# Supplementary material for: Mitochondrial related variants associated with cardiovascular traits
Source: Front Physiol. 2024 Aug 27;15:1395371. doi: 10.3389/fphys.2024.1395371 (PMC11385366; doi:10.3389/fphys.2024.1395371)
Supplement: Supplementary file 1 [file Table2.xlsx]

## Sheet: CAD
PHENO	COHORT	CHROM	Overlapped Gene	Type	Annotation	BP	RS	REF	ALT	A1	OBS_CT	OR.or.BETA	SE.or.LOG(OR)_SE	P	SP2
CAD	Overall	1	MRPL20	protein_coding	intronic,non-coding intronic,3downstream	1339288	rs35299041	G	C	G	381974	0.989238	0.0328204	0.74164	NA
CAD	noDM	1	MRPL20	protein_coding	intronic,non-coding intronic,3downstream	1339288	rs35299041	G	C	G	345225	1.00282	0.0367538	0.938854	NA
CAD	DM	1	MRPL20	protein_coding	intronic,non-coding intronic,3downstream	1339288	rs35299041	G	C	G	36749	0.938226	0.0725142	0.379215	NA
CAD	Overall	1	C1orf167	protein_coding	5upstream,non-coding intronic,intronic	11847335	rs183631107	C	G	C	381974	0.878715	0.0725311	0.0746491	NA
CAD	Overall	1	MTHFR	protein_coding	3utr,3downstream	11847335	rs183631107	C	G	C	381974	0.878715	0.0725311	0.0746491	NA
CAD	noDM	1	C1orf167	protein_coding	5upstream,non-coding intronic,intronic	11847335	rs183631107	C	G	C	345225	0.892353	0.0810244	0.159821	NA
CAD	noDM	1	MTHFR	protein_coding	3utr,3downstream	11847335	rs183631107	C	G	C	345225	0.892353	0.0810244	0.159821	NA
CAD	DM	1	C1orf167	protein_coding	5upstream,non-coding intronic,intronic	11847335	rs183631107	C	G	C	36749	0.831022	0.162158	0.253674	NA
CAD	DM	1	MTHFR	protein_coding	3utr,3downstream	11847335	rs183631107	C	G	C	36749	0.831022	0.162158	0.253674	NA
CAD	Overall	1	MTHFR	protein_coding	intronic	11851927	rs41394446	T	C	T	381974	0.960208	0.0319462	0.203711	NA
CAD	noDM	1	MTHFR	protein_coding	intronic	11851927	rs41394446	T	C	T	345225	0.961055	0.0359752	0.269503	NA
CAD	DM	1	MTHFR	protein_coding	intronic	11851927	rs41394446	T	C	T	36749	0.959472	0.0692624	0.550286	NA
CAD	Overall	1	MTHFR	protein_coding	coding nonsyn	11856378	rs1801133	A	G	A	381974	1.00321	0.0137321	0.815472	NA
CAD	noDM	1	MTHFR	protein_coding	coding nonsyn	11856378	rs1801133	A	G	A	345225	1.00764	0.0154439	0.622293	NA
CAD	DM	1	MTHFR	protein_coding	coding nonsyn	11856378	rs1801133	A	G	A	36749	0.987726	0.029924	0.679815	NA
CAD	Overall	1	MTHFR	protein_coding	intronic,5utr,5upstream	11864586	rs3753584	C	T	C	381974	0.985311	0.0176237	0.401101	NA
CAD	noDM	1	MTHFR	protein_coding	intronic,5utr,5upstream	11864586	rs3753584	C	T	C	345225	0.97103	0.0198728	0.13906	NA
CAD	DM	1	MTHFR	protein_coding	intronic,5utr,5upstream	11864586	rs3753584	C	T	C	36749	1.04125	0.0381575	0.289454	NA
CAD	Overall	1	CLIC4	protein_coding	non-coding intronic,intronic	25097223	rs200984770	C	CTTT	CTTT	381974	1.0359	0.0144515	0.0146616	NA
CAD	noDM	1	CLIC4	protein_coding	non-coding intronic,intronic	25097223	rs200984770	C	CTTT	CTTT	345225	1.04091	0.016239	0.013538	NA
CAD	DM	1	CLIC4	protein_coding	non-coding intronic,intronic	25097223	rs200984770	C	CTTT	CTTT	36749	1.01582	0.0316034	0.619417	NA
CAD	Overall	1	CLIC4	protein_coding	non-coding intronic,intronic	25113487	rs9661655	G	C	G	381974	1.03595	0.0143405	0.0137762	NA
CAD	noDM	1	CLIC4	protein_coding	non-coding intronic,intronic	25113487	rs9661655	G	C	G	345225	1.03907	0.0161278	0.0174779	NA
CAD	DM	1	CLIC4	protein_coding	non-coding intronic,intronic	25113487	rs9661655	G	C	G	36749	1.02306	0.0312729	0.465982	NA
CAD	Overall	1	CLIC4	protein_coding	non-coding intronic,intronic	25147689	rs11400541	GA	G	GA	381974	1.03454	0.0145762	0.0198149	NA
CAD	noDM	1	CLIC4	protein_coding	non-coding intronic,intronic	25147689	rs11400541	GA	G	GA	345225	1.03945	0.0163822	0.0181829	NA
CAD	DM	1	CLIC4	protein_coding	non-coding intronic,intronic	25147689	rs11400541	GA	G	GA	36749	1.01505	0.0318576	0.639129	NA
CAD	Overall	1	RP5-864K19.4	antisense	non-coding intronic	39363294	rs61780049	G	A	G	381974	1.03844	0.0180895	0.0370634	NA
CAD	Overall	1	RHBDL2	protein_coding	intronic	39363294	rs61780049	G	A	G	381974	1.03844	0.0180895	0.0370634	NA
CAD	noDM	1	RP5-864K19.4	antisense	non-coding intronic	39363294	rs61780049	G	A	G	345225	1.03607	0.0203765	0.0820648	NA
CAD	noDM	1	RHBDL2	protein_coding	intronic	39363294	rs61780049	G	A	G	345225	1.03607	0.0203765	0.0820648	NA
CAD	DM	1	RP5-864K19.4	antisense	non-coding intronic	39363294	rs61780049	G	A	G	36749	1.04686	0.0392159	0.242895	NA
CAD	DM	1	RHBDL2	protein_coding	intronic	39363294	rs61780049	G	A	G	36749	1.04686	0.0392159	0.242895	NA
CAD	Overall	1	HEYL	protein_coding	intronic	40095534	rs72663570	T	C	T	381974	0.988505	0.0175847	0.510876	NA
CAD	noDM	1	HEYL	protein_coding	intronic	40095534	rs72663570	T	C	T	345225	1.00132	0.0197137	0.946792	NA
CAD	DM	1	HEYL	protein_coding	intronic	40095534	rs72663570	T	C	T	36749	0.941568	0.0387328	0.120073	NA
CAD	Overall	1	TRIT1	protein_coding	non-coding intronic,intronic,coding frameshift:stop-loss	40341762	rs144707726	CA	C	CA	381974	1.01938	0.0152388	0.207727	NA
CAD	noDM	1	TRIT1	protein_coding	non-coding intronic,intronic,coding frameshift:stop-loss	40341762	rs144707726	CA	C	CA	345225	1.02572	0.0171204	0.137943	NA
CAD	DM	1	TRIT1	protein_coding	non-coding intronic,intronic,coding frameshift:stop-loss	40341762	rs144707726	CA	C	CA	36749	0.997329	0.0333291	0.936031	NA
CAD	Overall	1	ATG4C	protein_coding	intronic	63265523	rs58583743	A	G	A	381974	1.01602	0.0172672	0.357262	NA
CAD	noDM	1	ATG4C	protein_coding	intronic	63265523	rs58583743	A	G	A	345225	1.00769	0.0194591	0.693818	NA
CAD	DM	1	ATG4C	protein_coding	intronic	63265523	rs58583743	A	G	A	36749	1.04676	0.0373923	0.221636	NA
CAD	Overall	1	ATG4C	protein_coding	intronic	63272138	rs943696	A	G	A	381974	1.01592	0.0172717	0.360367	NA
CAD	noDM	1	ATG4C	protein_coding	intronic	63272138	rs943696	A	G	A	345225	1.00725	0.0194672	0.710703	NA
CAD	DM	1	ATG4C	protein_coding	intronic	63272138	rs943696	A	G	A	36749	1.04775	0.0373828	0.212124	NA
CAD	Overall	1	ATG4C	protein_coding	intronic	63274605	rs147655722	AT	A	AT	381974	0.957836	0.0396391	0.277137	NA
CAD	noDM	1	ATG4C	protein_coding	intronic	63274605	rs147655722	AT	A	AT	345225	0.925495	0.0451772	0.0865588	NA
CAD	DM	1	ATG4C	protein_coding	intronic	63274605	rs147655722	AT	A	AT	36749	1.08005	0.0830296	0.353712	NA
CAD	Overall	1	ATG4C	protein_coding	intronic	63280852	rs796528709	C	CT	C	381974	0.998835	0.0156719	0.940729	NA
CAD	noDM	1	ATG4C	protein_coding	intronic	63280852	rs796528709	C	CT	C	345225	1.00421	0.0175731	0.811163	NA
CAD	DM	1	ATG4C	protein_coding	intronic	63280852	rs796528709	C	CT	C	36749	0.979309	0.0345309	0.544852	NA
CAD	Overall	1	ATG4C	protein_coding	intronic	63281099	rs12406542	G	A	G	381974	1.03325	0.0286739	0.253919	NA
CAD	noDM	1	ATG4C	protein_coding	intronic	63281099	rs12406542	G	A	G	345225	1.02094	0.032388	0.522266	NA
CAD	DM	1	ATG4C	protein_coding	intronic	63281099	rs12406542	G	A	G	36749	1.08026	0.0616879	0.210773	NA
CAD	Overall	1	ATG4C	protein_coding	intronic	63283005	rs7539616	T	C	T	381974	0.999855	0.0156228	0.992607	NA
CAD	noDM	1	ATG4C	protein_coding	intronic	63283005	rs7539616	T	C	T	345225	1.00583	0.0175166	0.740185	NA
CAD	DM	1	ATG4C	protein_coding	intronic	63283005	rs7539616	T	C	T	36749	0.978135	0.034432	0.520834	NA
CAD	Overall	1	ATG4C	protein_coding	intronic	63290942	rs67922190	T	C	T	381974	1.02319	0.0167583	0.171251	NA
CAD	noDM	1	ATG4C	protein_coding	intronic	63290942	rs67922190	T	C	T	345225	1.01698	0.0188791	0.372446	NA
CAD	DM	1	ATG4C	protein_coding	intronic	63290942	rs67922190	T	C	T	36749	1.04603	0.036336	0.215546	NA
CAD	Overall	1	ATG4C	protein_coding	intronic	63305579	rs569483209	GA	G	GA	381974	1.01083	0.0175044	0.53814	NA
CAD	noDM	1	ATG4C	protein_coding	intronic	63305579	rs569483209	GA	G	GA	345225	1.00094	0.0197395	0.96207	NA
CAD	DM	1	ATG4C	protein_coding	intronic	63305579	rs569483209	GA	G	GA	36749	1.0471	0.0378272	0.223698	NA
CAD	Overall	1	ATG4C	protein_coding	intronic	63310797	rs144171645	A	T	A	381974	0.98005	0.0531594	0.704634	NA
CAD	noDM	1	ATG4C	protein_coding	intronic	63310797	rs144171645	A	T	A	345225	0.950343	0.0602677	0.398049	NA
CAD	DM	1	ATG4C	protein_coding	intronic	63310797	rs144171645	A	T	A	36749	1.09503	0.113355	0.42322	NA
CAD	Overall	1	ATG4C	protein_coding	intronic	63320239	rs116466322	T	C	T	381974	0.901937	0.033328	0.00195617	NA
CAD	noDM	1	ATG4C	protein_coding	intronic	63320239	rs116466322	T	C	T	345225	0.916851	0.0371471	0.0194425	NA
CAD	DM	1	ATG4C	protein_coding	intronic	63320239	rs116466322	T	C	T	36749	0.845707	0.0750158	0.0254853	NA
CAD	Overall	1	ATG4C	protein_coding	intronic	63329415	rs77871448	G	A	G	381974	0.963054	0.0374578	0.314889	NA
CAD	noDM	1	ATG4C	protein_coding	intronic	63329415	rs77871448	G	A	G	345225	0.932859	0.0426511	0.1032	NA
CAD	DM	1	ATG4C	protein_coding	intronic	63329415	rs77871448	G	A	G	36749	1.07723	0.0786896	0.344472	NA
CAD	Overall	1	SGIP1	protein_coding	non-coding intronic,intronic	67010104	rs7553325	T	C	C	381974	1.01956	0.013016	0.136728	NA
CAD	noDM	1	SGIP1	protein_coding	non-coding intronic,intronic	67010104	rs7553325	T	C	C	345225	1.01557	0.0146405	0.291295	NA
CAD	DM	1	SGIP1	protein_coding	non-coding intronic,intronic	67010104	rs7553325	T	C	C	36749	1.03441	0.0283711	0.233058	NA
CAD	Overall	1	SGIP1	protein_coding	non-coding intronic,intronic	67069745	rs115261885	A	G	A	381974	0.989028	0.0278367	0.691847	NA
CAD	noDM	1	SGIP1	protein_coding	non-coding intronic,intronic	67069745	rs115261885	A	G	A	345225	0.996313	0.0312744	0.905969	NA
CAD	DM	1	SGIP1	protein_coding	non-coding intronic,intronic	67069745	rs115261885	A	G	A	36749	0.959993	0.0608512	0.50224	NA
CAD	Overall	1	SGIP1	protein_coding	non-coding,coding nonsyn,coding *nonsyn	67109335	rs7526812	G	A	G	381974	0.980154	0.0179993	0.265408	NA
CAD	noDM	1	SGIP1	protein_coding	non-coding,coding nonsyn,coding *nonsyn	67109335	rs7526812	G	A	G	345225	0.98369	0.02021	0.415839	NA
CAD	DM	1	SGIP1	protein_coding	non-coding,coding nonsyn,coding *nonsyn	67109335	rs7526812	G	A	G	36749	0.966478	0.039471	0.387679	NA
CAD	Overall	1	CCBL2	protein_coding	intronic,non-coding intronic	89408394	rs12732490	T	C	T	381974	1.01629	0.0132679	0.223281	NA
CAD	noDM	1	CCBL2	protein_coding	intronic,non-coding intronic	89408394	rs12732490	T	C	T	345225	1.02103	0.014897	0.162318	NA
CAD	DM	1	CCBL2	protein_coding	intronic,non-coding intronic	89408394	rs12732490	T	C	T	36749	0.998785	0.0290912	0.966663	NA
CAD	Overall	1	CCBL2	protein_coding	non-coding intronic,intronic	89410840	rs11391031	GT	G	GT	381974	1.01564	0.0210989	0.462062	NA
CAD	noDM	1	CCBL2	protein_coding	non-coding intronic,intronic	89410840	rs11391031	GT	G	GT	345225	1.01079	0.0237261	0.651058	NA
CAD	DM	1	CCBL2	protein_coding	non-coding intronic,intronic	89410840	rs11391031	GT	G	GT	36749	1.03546	0.0460475	0.449171	NA
CAD	Overall	1	SARS	protein_coding	intronic,non-coding,non-coding intronic	109757295	rs4970829	A	G	A	381974	0.918351	0.0258291	0.000974977	NA
CAD	noDM	1	SARS	protein_coding	intronic,non-coding,non-coding intronic	109757295	rs4970829	A	G	A	345225	0.918105	0.0291388	0.00336476	NA
CAD	DM	1	SARS	protein_coding	intronic,non-coding,non-coding intronic	109757295	rs4970829	A	G	A	36749	0.920845	0.0556645	0.13849	NA
CAD	Overall	1	SARS	protein_coding	non-coding intronic,3downstream,intronic	109759776	rs685653	G	A	G	381974	1.02982	0.014996	0.0500646	NA
CAD	noDM	1	SARS	protein_coding	non-coding intronic,3downstream,intronic	109759776	rs685653	G	A	G	345225	1.03098	0.0168445	0.0701202	NA
CAD	DM	1	SARS	protein_coding	non-coding intronic,3downstream,intronic	109759776	rs685653	G	A	G	36749	1.02785	0.0328475	0.403078	NA
CAD	Overall	1	SARS	protein_coding	intronic,non-coding intronic	109760555	rs61799425	C	T	C	381974	0.919856	0.025835	0.00122275	NA
CAD	noDM	1	SARS	protein_coding	intronic,non-coding intronic	109760555	rs61799425	C	T	C	345225	0.919879	0.0291423	0.0041608	NA
CAD	DM	1	SARS	protein_coding	intronic,non-coding intronic	109760555	rs61799425	C	T	C	36749	0.921332	0.0556965	0.141265	NA
CAD	Overall	1	SARS	protein_coding	non-coding intronic,intronic	109762333	rs2485323	T	C	T	381974	1.01642	0.015515	0.293744	NA
CAD	noDM	1	SARS	protein_coding	non-coding intronic,intronic	109762333	rs2485323	T	C	T	345225	1.01753	0.0174234	0.318583	NA
CAD	DM	1	SARS	protein_coding	non-coding intronic,intronic	109762333	rs2485323	T	C	T	36749	1.01499	0.034015	0.661886	NA
CAD	Overall	1	SARS	protein_coding	non-coding intronic,intronic	109763768	rs55723005	T	C	T	381974	1.01166	0.0234748	0.621547	NA
CAD	noDM	1	SARS	protein_coding	non-coding intronic,intronic	109763768	rs55723005	T	C	T	345225	1.00143	0.0264385	0.95675	NA
CAD	DM	1	SARS	protein_coding	non-coding intronic,intronic	109763768	rs55723005	T	C	T	36749	1.05048	0.0510212	0.334446	NA
CAD	Overall	1	SARS	protein_coding	non-coding intronic,intronic	109763924	rs1277928	A	G	A	381974	1.0287	0.0204801	0.167079	NA
CAD	noDM	1	SARS	protein_coding	non-coding intronic,intronic	109763924	rs1277928	A	G	A	345225	1.02921	0.0230236	0.211123	NA
CAD	DM	1	SARS	protein_coding	non-coding intronic,intronic	109763924	rs1277928	A	G	A	36749	1.03063	0.0447332	0.500033	NA
CAD	Overall	1	SARS	protein_coding	non-coding intronic,intronic	109766191	rs626784	T	C	T	381974	1.03305	0.0205075	0.11288	NA
CAD	noDM	1	SARS	protein_coding	non-coding intronic,intronic	109766191	rs626784	T	C	T	345225	1.03397	0.0230511	0.147306	NA
CAD	DM	1	SARS	protein_coding	non-coding intronic,intronic	109766191	rs626784	T	C	T	36749	1.03348	0.0448152	0.462438	NA
CAD	Overall	1	SARS	protein_coding	intronic,non-coding intronic	109776285	rs35271870	C	T	C	381974	0.892849	0.0238969	2.10791e-06	NA
CAD	noDM	1	SARS	protein_coding	intronic,non-coding intronic	109776285	rs35271870	C	T	C	345225	0.904622	0.0268015	0.000183998	NA
CAD	DM	1	SARS	protein_coding	intronic,non-coding intronic	109776285	rs35271870	C	T	C	36749	0.849957	0.0525664	0.00198372	NA
CAD	Overall	1	SARS	protein_coding	non-coding intronic,intronic,5upstream	109777764	rs114166723	A	G	A	381974	1.05276	0.0431402	0.233323	NA
CAD	noDM	1	SARS	protein_coding	non-coding intronic,intronic,5upstream	109777764	rs114166723	A	G	A	345225	1.05966	0.0484588	0.231785	NA
CAD	DM	1	SARS	protein_coding	non-coding intronic,intronic,5upstream	109777764	rs114166723	A	G	A	36749	1.02387	0.0942909	0.802444	NA
CAD	Overall	1	SARS	protein_coding	3downstream,intronic,5upstream	109778237	rs4268379	T	C	T	381974	1.02137	0.013017	0.104265	NA
CAD	noDM	1	SARS	protein_coding	3downstream,intronic,5upstream	109778237	rs4268379	T	C	T	345225	1.02888	0.0146287	0.051597	NA
CAD	DM	1	SARS	protein_coding	3downstream,intronic,5upstream	109778237	rs4268379	T	C	T	36749	0.993039	0.0284673	0.80616	NA
CAD	Overall	1	GSTM4	protein_coding	5utr,5upstream	110198709	rs566427988	C	G	C	381974	0.891673	0.0543569	0.0349183	NA
CAD	noDM	1	GSTM4	protein_coding	5utr,5upstream	110198709	rs566427988	C	G	C	345225	0.878885	0.0613222	0.0352659	NA
CAD	DM	1	GSTM4	protein_coding	5utr,5upstream	110198709	rs566427988	C	G	C	36749	0.933775	0.117449	0.559628	NA
CAD	Overall	1	GSTM4	protein_coding	5upstream,5utr	110198727	rs1010167	G	C	G	381974	1.0499	0.0133077	0.000253082	NA
CAD	noDM	1	GSTM4	protein_coding	5upstream,5utr	110198727	rs1010167	G	C	G	345225	1.04382	0.014968	0.00416614	NA
CAD	DM	1	GSTM4	protein_coding	5upstream,5utr	110198727	rs1010167	G	C	G	36749	1.07214	0.0290198	0.016386	NA
CAD	Overall	1	GSTM4	protein_coding	non-coding intronic,3downstream,intronic	110201580	rs650985	T	C	C	381974	0.950921	0.0261618	0.0544063	NA
CAD	noDM	1	GSTM4	protein_coding	non-coding intronic,3downstream,intronic	110201580	rs650985	T	C	C	345225	0.944518	0.0295282	0.0532259	NA
CAD	DM	1	GSTM4	protein_coding	non-coding intronic,3downstream,intronic	110201580	rs650985	T	C	C	36749	0.972436	0.0563435	0.61984	NA
CAD	Overall	1	GSTM2	protein_coding	intronic	110248468	rs1296955	G	A	A	381974	1.00966	0.0199898	0.630462	NA
CAD	Overall	1	GSTM1	protein_coding	non-coding intronic,intronic	110248468	rs1296955	G	A	A	381974	1.00966	0.0199898	0.630462	NA
CAD	noDM	1	GSTM2	protein_coding	intronic	110248468	rs1296955	G	A	A	345225	0.993642	0.0226234	0.777997	NA
CAD	noDM	1	GSTM1	protein_coding	non-coding intronic,intronic	110248468	rs1296955	G	A	A	345225	0.993642	0.0226234	0.777997	NA
CAD	DM	1	GSTM2	protein_coding	intronic	110248468	rs1296955	G	A	A	36749	1.07197	0.0426978	0.103582	NA
CAD	DM	1	GSTM1	protein_coding	non-coding intronic,intronic	110248468	rs1296955	G	A	A	36749	1.07197	0.0426978	0.103582	NA
CAD	Overall	1	RHOC	protein_coding	non-coding intronic,3downstream,intronic	113244433	rs2279500	C	T	T	381974	1.00818	0.0173027	0.637634	NA
CAD	noDM	1	RHOC	protein_coding	non-coding intronic,3downstream,intronic	113244433	rs2279500	C	T	T	345225	0.992205	0.0195043	0.688255	NA
CAD	DM	1	RHOC	protein_coding	non-coding intronic,3downstream,intronic	113244433	rs2279500	C	T	T	36749	1.07159	0.037495	0.0651855	NA
CAD	Overall	1	RP11-426L16.10	protein_coding	non-coding intronic,intronic	113247563	rs2279499	A	G	A	381974	0.998611	0.0160122	0.93082	NA
CAD	Overall	1	RHOC	protein_coding	5utr,non-coding,intronic,5upstream,non-coding intronic	113247563	rs2279499	A	G	A	381974	0.998611	0.0160122	0.93082	NA
CAD	noDM	1	RP11-426L16.10	protein_coding	non-coding intronic,intronic	113247563	rs2279499	A	G	A	345225	1.01175	0.0179494	0.51519	NA
CAD	noDM	1	RHOC	protein_coding	5utr,non-coding,intronic,5upstream,non-coding intronic	113247563	rs2279499	A	G	A	345225	1.01175	0.0179494	0.51519	NA
CAD	DM	1	RP11-426L16.10	protein_coding	non-coding intronic,intronic	113247563	rs2279499	A	G	A	36749	0.950157	0.0352832	0.147318	NA
CAD	DM	1	RHOC	protein_coding	5utr,non-coding,intronic,5upstream,non-coding intronic	113247563	rs2279499	A	G	A	36749	0.950157	0.0352832	0.147318	NA
CAD	Overall	1	RP11-426L16.10	protein_coding	non-coding intronic,intronic	113247713	rs35221527	A	G	A	381974	0.995613	0.0173612	0.800081	NA
CAD	Overall	1	RHOC	protein_coding	5upstream,non-coding intronic,non-coding,intronic,5utr	113247713	rs35221527	A	G	A	381974	0.995613	0.0173612	0.800081	NA
CAD	noDM	1	RP11-426L16.10	protein_coding	non-coding intronic,intronic	113247713	rs35221527	A	G	A	345225	0.985942	0.0195358	0.468646	NA
CAD	noDM	1	RHOC	protein_coding	5upstream,non-coding intronic,non-coding,intronic,5utr	113247713	rs35221527	A	G	A	345225	0.985942	0.0195358	0.468646	NA
CAD	DM	1	RP11-426L16.10	protein_coding	non-coding intronic,intronic	113247713	rs35221527	A	G	A	36749	1.03352	0.0378159	0.38334	NA
CAD	DM	1	RHOC	protein_coding	5upstream,non-coding intronic,non-coding,intronic,5utr	113247713	rs35221527	A	G	A	36749	1.03352	0.0378159	0.38334	NA
CAD	Overall	1	SLC16A1	protein_coding	3downstream,3utr	113455099	rs7169	A	G	G	381974	0.963833	0.0130782	0.00485177	NA
CAD	noDM	1	SLC16A1	protein_coding	3downstream,3utr	113455099	rs7169	A	G	G	345225	0.967204	0.0147056	0.0233579	NA
CAD	DM	1	SLC16A1	protein_coding	3downstream,3utr	113455099	rs7169	A	G	G	36749	0.950289	0.0285366	0.0739695	NA
CAD	Overall	1	SLC16A1	protein_coding	3utr,3downstream,intronic	113458987	rs6682142	A	G	A	381974	1.04344	0.0139204	0.0022549	NA
CAD	noDM	1	SLC16A1	protein_coding	3utr,3downstream,intronic	113458987	rs6682142	A	G	A	345225	1.04555	0.0156173	0.00434502	NA
CAD	DM	1	SLC16A1	protein_coding	3utr,3downstream,intronic	113458987	rs6682142	A	G	A	36749	1.03656	0.0306321	0.241144	NA
CAD	Overall	1	SLC16A1	protein_coding	non-coding intronic,intronic	113481608	rs6537764	G	T	T	381974	0.96477	0.0130785	0.00610078	NA
CAD	noDM	1	SLC16A1	protein_coding	non-coding intronic,intronic	113481608	rs6537764	G	T	T	345225	0.967824	0.0147058	0.0261514	NA
CAD	DM	1	SLC16A1	protein_coding	non-coding intronic,intronic	113481608	rs6537764	G	T	T	36749	0.952361	0.0285393	0.0872105	NA
CAD	Overall	1	SLC16A1	protein_coding	non-coding intronic,intronic	113491364	rs6663872	A	T	T	381974	0.964717	0.0130927	0.00607853	NA
CAD	noDM	1	SLC16A1	protein_coding	non-coding intronic,intronic	113491364	rs6663872	A	T	T	345225	0.967499	0.0147211	0.0248024	NA
CAD	DM	1	SLC16A1	protein_coding	non-coding intronic,intronic	113491364	rs6663872	A	T	T	36749	0.953341	0.0285751	0.0944884	NA
CAD	Overall	1	RNF115	protein_coding	intronic	145630111	rs75246752	C	G	C	381974	0.961073	0.0585441	0.497641	NA
CAD	noDM	1	RNF115	protein_coding	intronic	145630111	rs75246752	C	G	C	345225	0.919804	0.0669203	0.211602	NA
CAD	DM	1	RNF115	protein_coding	intronic	145630111	rs75246752	C	G	C	36749	1.12133	0.1218	0.347105	NA
CAD	Overall	1	RNF115	protein_coding	3utr	145690999	rs10910842	C	G	C	381974	1.00093	0.0154038	0.952003	NA
CAD	noDM	1	RNF115	protein_coding	3utr	145690999	rs10910842	C	G	C	345225	1.00505	0.017314	0.77117	NA
CAD	DM	1	RNF115	protein_coding	3utr	145690999	rs10910842	C	G	C	36749	0.98806	0.0336418	0.721046	NA
CAD	Overall	1	BOLA1	protein_coding	intronic	149864493	rs141142383	T	C	T	381974	1.01201	0.0237312	0.614802	NA
CAD	noDM	1	BOLA1	protein_coding	intronic	149864493	rs141142383	T	C	T	345225	0.992869	0.026812	0.789528	NA
CAD	DM	1	BOLA1	protein_coding	intronic	149864493	rs141142383	T	C	T	36749	1.08566	0.0510901	0.107684	NA
CAD	Overall	1	BOLA1	protein_coding	non-coding,coding nonsyn	149871905	rs1044808	C	G	C	381974	1.01094	0.023491	0.643153	NA
CAD	noDM	1	BOLA1	protein_coding	non-coding,coding nonsyn	149871905	rs1044808	C	G	C	345225	0.992303	0.0265344	0.770913	NA
CAD	DM	1	BOLA1	protein_coding	non-coding,coding nonsyn	149871905	rs1044808	C	G	C	36749	1.08264	0.0506076	0.116649	NA
CAD	Overall	1	TARS2	protein_coding	non-coding intronic,intronic	150467096	rs141935877	A	T	A	381974	1.00511	0.0246993	0.836569	NA
CAD	noDM	1	TARS2	protein_coding	non-coding intronic,intronic	150467096	rs141935877	A	T	A	345225	0.993525	0.0278415	0.815497	NA
CAD	DM	1	TARS2	protein_coding	non-coding intronic,intronic	150467096	rs141935877	A	T	A	36749	1.05021	0.0535243	0.360014	NA
CAD	Overall	1	TARS2	protein_coding	intronic,non-coding intronic,3downstream	150470478	rs11590353	A	C	A	381974	1.01898	0.0132412	0.155556	NA
CAD	noDM	1	TARS2	protein_coding	intronic,non-coding intronic,3downstream	150470478	rs11590353	A	C	A	345225	1.0148	0.0148898	0.323677	NA
CAD	DM	1	TARS2	protein_coding	intronic,non-coding intronic,3downstream	150470478	rs11590353	A	C	A	36749	1.03328	0.0288933	0.257129	NA
CAD	Overall	1	TARS2	protein_coding	5upstream,non-coding intronic,intronic	150476186	rs77257036	T	C	T	381974	1.03531	0.0136409	0.0109622	NA
CAD	noDM	1	TARS2	protein_coding	5upstream,non-coding intronic,intronic	150476186	rs77257036	T	C	T	345225	1.02654	0.0153327	0.0875849	NA
CAD	DM	1	TARS2	protein_coding	5upstream,non-coding intronic,intronic	150476186	rs77257036	T	C	T	36749	1.06795	0.0298256	0.0275018	NA
CAD	Overall	1	PRUNE	protein_coding	non-coding intronic,intronic	150986662	rs1673161	G	A	G	381974	1.00892	0.023992	0.711335	NA
CAD	noDM	1	PRUNE	protein_coding	non-coding intronic,intronic	150986662	rs1673161	G	A	G	345225	0.988935	0.0271324	0.681747	NA
CAD	DM	1	PRUNE	protein_coding	non-coding intronic,intronic	150986662	rs1673161	G	A	G	36749	1.08669	0.051457	0.106173	NA
CAD	Overall	1	HAX1	protein_coding	5upstream,non-coding,5utr	154245142	rs11265425	G	T	G	381974	1.00778	0.0141596	0.584034	NA
CAD	noDM	1	HAX1	protein_coding	5upstream,non-coding,5utr	154245142	rs11265425	G	T	G	345225	1.00977	0.0159163	0.541434	NA
CAD	DM	1	HAX1	protein_coding	5upstream,non-coding,5utr	154245142	rs11265425	G	T	G	36749	1.00231	0.0309249	0.940599	NA
CAD	Overall	1	LMNA	protein_coding	non-coding intronic,intronic	156080441	rs59729272	AC	A	AC	381974	0.984605	0.0152269	0.308249	NA
CAD	noDM	1	LMNA	protein_coding	non-coding intronic,intronic	156080441	rs59729272	AC	A	AC	345225	0.991322	0.0170877	0.610002	NA
CAD	DM	1	LMNA	protein_coding	non-coding intronic,intronic	156080441	rs59729272	AC	A	AC	36749	0.961335	0.0334319	0.23821	NA
CAD	Overall	1	DNM3	protein_coding	intronic,non-coding intronic	172357441	rs12405515	T	G	G	381974	1.02799	0.0131149	0.0353306	NA
CAD	Overall	1	PIGC	protein_coding	non-coding intronic	172357441	rs12405515	T	G	G	381974	1.02799	0.0131149	0.0353306	NA
CAD	noDM	1	DNM3	protein_coding	intronic,non-coding intronic	172357441	rs12405515	T	G	G	345225	1.0329	0.0147386	0.0280684	NA
CAD	noDM	1	PIGC	protein_coding	non-coding intronic	172357441	rs12405515	T	G	G	345225	1.0329	0.0147386	0.0280684	NA
CAD	DM	1	DNM3	protein_coding	intronic,non-coding intronic	172357441	rs12405515	T	G	G	36749	1.01072	0.0286764	0.709893	NA
CAD	DM	1	PIGC	protein_coding	non-coding intronic	172357441	rs12405515	T	G	G	36749	1.01072	0.0286764	0.709893	NA
CAD	Overall	1	LAMC1	protein_coding	intronic	183058452	rs41475048	G	A	G	381974	1.03706	0.0148479	0.0142466	NA
CAD	noDM	1	LAMC1	protein_coding	intronic	183058452	rs41475048	G	A	G	345225	1.05111	0.0166306	0.00272437	NA
CAD	DM	1	LAMC1	protein_coding	intronic	183058452	rs41475048	G	A	G	36749	0.983443	0.0328396	0.611168	NA
CAD	Overall	1	LAMC1	protein_coding	5upstream,intronic	183077896	rs10752898	C	T	T	381974	0.961547	0.0130886	0.00273673	NA
CAD	noDM	1	LAMC1	protein_coding	5upstream,intronic	183077896	rs10752898	C	T	T	345225	0.966752	0.0147031	0.0214623	NA
CAD	DM	1	LAMC1	protein_coding	5upstream,intronic	183077896	rs10752898	C	T	T	36749	0.942468	0.0286654	0.0387261	NA
CAD	Overall	1	GLRX2	protein_coding	non-coding intronic,intronic	193073566	rs10801174	A	T	T	381974	1.02361	0.0138852	0.092833	NA
CAD	noDM	1	GLRX2	protein_coding	non-coding intronic,intronic	193073566	rs10801174	A	T	T	345225	1.02277	0.0156003	0.148935	NA
CAD	DM	1	GLRX2	protein_coding	non-coding intronic,intronic	193073566	rs10801174	A	T	T	36749	1.02571	0.030382	0.403496	NA
CAD	Overall	1	LYPLAL1	protein_coding	intronic,non-coding intronic	219377340	rs17049143	C	G	C	381974	0.98116	0.0142727	0.182669	NA
CAD	noDM	1	LYPLAL1	protein_coding	intronic,non-coding intronic	219377340	rs17049143	C	G	C	345225	0.970422	0.0160681	0.0616873	NA
CAD	DM	1	LYPLAL1	protein_coding	intronic,non-coding intronic	219377340	rs17049143	C	G	C	36749	1.02339	0.0310259	0.456126	NA
CAD	Overall	1	SLC30A10	protein_coding	non-coding intronic	220023215	rs61836039	A	C	A	381974	1.05661	0.0445442	0.216413	NA
CAD	noDM	1	SLC30A10	protein_coding	non-coding intronic	220023215	rs61836039	A	C	A	345225	1.06402	0.0500564	0.215094	NA
CAD	DM	1	SLC30A10	protein_coding	non-coding intronic	220023215	rs61836039	A	C	A	36749	1.02872	0.0972509	0.770893	NA
CAD	Overall	1	MARC1	protein_coding	5upstream,non-coding,coding nonsyn	220970028	rs2642438	G	A	A	381974	0.985181	0.014203	0.293167	NA
CAD	noDM	1	MARC1	protein_coding	5upstream,non-coding,coding nonsyn	220970028	rs2642438	G	A	A	345225	0.980996	0.0160074	0.230677	NA
CAD	DM	1	MARC1	protein_coding	5upstream,non-coding,coding nonsyn	220970028	rs2642438	G	A	A	36749	0.999211	0.0307388	0.979518	NA
CAD	Overall	1	MARC1	protein_coding	non-coding intronic,intronic,5upstream	220970593	rs2807834	G	T	T	381974	0.98102	0.0140039	0.171199	NA
CAD	noDM	1	MARC1	protein_coding	non-coding intronic,intronic,5upstream	220970593	rs2807834	G	T	T	345225	0.972988	0.0157915	0.0829103	NA
CAD	DM	1	MARC1	protein_coding	non-coding intronic,intronic,5upstream	220970593	rs2807834	G	T	T	36749	1.01001	0.0302644	0.742156	NA
CAD	Overall	1	MARC1	protein_coding	non-coding intronic,intronic	220975414	rs12124030	T	G	T	381974	1.00188	0.0145858	0.897372	NA
CAD	noDM	1	MARC1	protein_coding	non-coding intronic,intronic	220975414	rs12124030	T	G	T	345225	0.999455	0.0164248	0.973539	NA
CAD	DM	1	MARC1	protein_coding	non-coding intronic,intronic	220975414	rs12124030	T	G	T	36749	1.01314	0.0316683	0.680155	NA
CAD	Overall	1	MARC1	protein_coding	non-coding intronic,3downstream,intronic	220983017	rs11118606	G	A	G	381974	1.01264	0.0147687	0.395104	NA
CAD	noDM	1	MARC1	protein_coding	non-coding intronic,3downstream,intronic	220983017	rs11118606	G	A	G	345225	1.01338	0.0165923	0.42316	NA
CAD	DM	1	MARC1	protein_coding	non-coding intronic,3downstream,intronic	220983017	rs11118606	G	A	G	36749	1.00823	0.0323388	0.799988	NA
CAD	Overall	1	MARC1	protein_coding	non-coding intronic,intronic,3downstream	220983402	rs17649913	C	T	C	381974	0.976627	0.0157846	0.134044	NA
CAD	noDM	1	MARC1	protein_coding	non-coding intronic,intronic,3downstream	220983402	rs17649913	C	T	C	345225	0.979738	0.0177049	0.247606	NA
CAD	DM	1	MARC1	protein_coding	non-coding intronic,intronic,3downstream	220983402	rs17649913	C	T	C	36749	0.963607	0.0347338	0.285835	NA
CAD	Overall	1	MARC1	protein_coding	non-coding intronic,intronic	220985811	rs903319	C	T	C	381974	0.992763	0.0147529	0.622502	NA
CAD	noDM	1	MARC1	protein_coding	non-coding intronic,intronic	220985811	rs903319	C	T	C	345225	0.987578	0.0166211	0.45203	NA
CAD	DM	1	MARC1	protein_coding	non-coding intronic,intronic	220985811	rs903319	C	T	C	36749	1.01407	0.0319832	0.662299	NA
CAD	Overall	1	NVL	protein_coding	non-coding intronic,intronic	224517064	rs77674430	A	G	A	381974	1.02383	0.0191625	0.219025	NA
CAD	noDM	1	NVL	protein_coding	non-coding intronic,intronic	224517064	rs77674430	A	G	A	345225	1.02477	0.0215116	0.255389	NA
CAD	DM	1	NVL	protein_coding	non-coding intronic,intronic	224517064	rs77674430	A	G	A	36749	1.02192	0.0420689	0.606293	NA
CAD	Overall	1	ADCK3	protein_coding	non-coding intronic,intronic	227139143	rs2482450	C	T	T	381974	1.02161	0.0129721	0.0993291	NA
CAD	noDM	1	ADCK3	protein_coding	non-coding intronic,intronic	227139143	rs2482450	C	T	T	345225	1.02463	0.014556	0.0945771	NA
CAD	DM	1	ADCK3	protein_coding	non-coding intronic,intronic	227139143	rs2482450	C	T	T	36749	1.00857	0.0285236	0.764922	NA
CAD	Overall	1	GUK1	protein_coding	5upstream,intronic,non-coding intronic,3downstream	228331040	rs2313602	A	C	C	381974	0.99011	0.0132074	0.451726	NA
CAD	noDM	1	GUK1	protein_coding	5upstream,intronic,non-coding intronic,3downstream	228331040	rs2313602	A	C	C	345225	1.00319	0.0148124	0.829555	NA
CAD	DM	1	GUK1	protein_coding	5upstream,intronic,non-coding intronic,3downstream	228331040	rs2313602	A	C	C	36749	0.941495	0.029096	0.038266	NA
CAD	Overall	1	IBA57	protein_coding	non-coding,intronic	228359775	rs2066237	C	T	T	381974	0.989296	0.0133218	0.419171	NA
CAD	noDM	1	IBA57	protein_coding	non-coding,intronic	228359775	rs2066237	C	T	T	345225	1.00135	0.0149403	0.927945	NA
CAD	DM	1	IBA57	protein_coding	non-coding,intronic	228359775	rs2066237	C	T	T	36749	0.944254	0.0293484	0.0506458	NA
CAD	Overall	1	AKT3	protein_coding	intronic	243703179	rs72759896	G	A	G	381974	1.00499	0.0194382	0.797926	NA
CAD	noDM	1	AKT3	protein_coding	intronic	243703179	rs72759896	G	A	G	345225	0.999978	0.0218521	0.999207	NA
CAD	DM	1	AKT3	protein_coding	intronic	243703179	rs72759896	G	A	G	36749	1.02264	0.0424979	0.598369	NA
CAD	Overall	2	HS1BP3	protein_coding	intronic	20767472	rs181981723	T	C	T	381974	1.02477	0.0651246	0.707089	NA
CAD	noDM	2	HS1BP3	protein_coding	intronic	20767472	rs181981723	T	C	T	345225	1.00786	0.0735253	0.91516	NA
CAD	DM	2	HS1BP3	protein_coding	intronic	20767472	rs181981723	T	C	T	36749	1.09395	0.14043	0.522533	NA
CAD	Overall	2	DNAJC27	protein_coding	3utr,3downstream	25170158	rs139553812	TC	T	TC	381974	0.996335	0.0152621	0.809857	NA
CAD	noDM	2	DNAJC27	protein_coding	3utr,3downstream	25170158	rs139553812	TC	T	TC	345225	0.999291	0.0171879	0.967077	NA
CAD	DM	2	DNAJC27	protein_coding	3utr,3downstream	25170158	rs139553812	TC	T	TC	36749	0.986905	0.0331012	0.690467	NA
CAD	Overall	2	DNAJC27	protein_coding	intronic,non-coding intronic,3downstream	25180474	rs536112017	GA	G	GA	381974	1.03829	0.0205023	0.0668633	NA
CAD	noDM	2	DNAJC27	protein_coding	intronic,non-coding intronic,3downstream	25180474	rs536112017	GA	G	GA	345225	1.04202	0.0230306	0.0739001	NA
CAD	DM	2	DNAJC27	protein_coding	intronic,non-coding intronic,3downstream	25180474	rs536112017	GA	G	GA	36749	1.02398	0.044894	0.597602	NA
CAD	Overall	2	DNAJC27-AS1	antisense	5upstream,non-coding intronic	25194741	rs7593864	A	G	G	381974	0.997333	0.0152436	0.860941	NA
CAD	Overall	2	DNAJC27	protein_coding	5upstream,coding syn	25194741	rs7593864	A	G	G	381974	0.997333	0.0152436	0.860941	NA
CAD	noDM	2	DNAJC27-AS1	antisense	5upstream,non-coding intronic	25194741	rs7593864	A	G	G	345225	1.00006	0.0171669	0.997115	NA
CAD	noDM	2	DNAJC27	protein_coding	5upstream,coding syn	25194741	rs7593864	A	G	G	345225	1.00006	0.0171669	0.997115	NA
CAD	DM	2	DNAJC27-AS1	antisense	5upstream,non-coding intronic	25194741	rs7593864	A	G	G	36749	0.988817	0.0330615	0.733731	NA
CAD	DM	2	DNAJC27	protein_coding	5upstream,coding syn	25194741	rs7593864	A	G	G	36749	0.988817	0.0330615	0.733731	NA
CAD	Overall	2	SLC35F6	protein_coding	non-coding intronic,intronic	26990430	rs116561716	A	T	A	381974	0.974059	0.0333959	0.431267	NA
CAD	Overall	2	CENPA	protein_coding	non-coding intronic	26990430	rs116561716	A	T	A	381974	0.974059	0.0333959	0.431267	NA
CAD	noDM	2	SLC35F6	protein_coding	non-coding intronic,intronic	26990430	rs116561716	A	T	A	345225	0.990531	0.0371745	0.79801	NA
CAD	noDM	2	CENPA	protein_coding	non-coding intronic	26990430	rs116561716	A	T	A	345225	0.990531	0.0371745	0.79801	NA
CAD	DM	2	SLC35F6	protein_coding	non-coding intronic,intronic	26990430	rs116561716	A	T	A	36749	0.912359	0.0755061	0.224458	NA
CAD	DM	2	CENPA	protein_coding	non-coding intronic	26990430	rs116561716	A	T	A	36749	0.912359	0.0755061	0.224458	NA
CAD	Overall	2	SLC35F6	protein_coding	non-coding intronic,intronic	26994277	rs828263	G	A	A	381974	1.02972	0.0254944	0.250592	NA
CAD	Overall	2	CENPA	protein_coding	non-coding intronic	26994277	rs828263	G	A	A	381974	1.02972	0.0254944	0.250592	NA
CAD	noDM	2	SLC35F6	protein_coding	non-coding intronic,intronic	26994277	rs828263	G	A	A	345225	1.00496	0.0290034	0.864617	NA
CAD	noDM	2	CENPA	protein_coding	non-coding intronic	26994277	rs828263	G	A	A	345225	1.00496	0.0290034	0.864617	NA
CAD	DM	2	SLC35F6	protein_coding	non-coding intronic,intronic	26994277	rs828263	G	A	A	36749	1.12044	0.0536327	0.0339771	NA
CAD	DM	2	CENPA	protein_coding	non-coding intronic	26994277	rs828263	G	A	A	36749	1.12044	0.0536327	0.0339771	NA
CAD	Overall	2	CENPA	protein_coding	non-coding intronic	26995082	rs76508715	T	C	T	381974	1.01225	0.034314	0.722785	NA
CAD	Overall	2	SLC35F6	protein_coding	non-coding intronic,intronic	26995082	rs76508715	T	C	T	381974	1.01225	0.034314	0.722785	NA
CAD	noDM	2	CENPA	protein_coding	non-coding intronic	26995082	rs76508715	T	C	T	345225	1.04238	0.0383015	0.278512	NA
CAD	noDM	2	SLC35F6	protein_coding	non-coding intronic,intronic	26995082	rs76508715	T	C	T	345225	1.04238	0.0383015	0.278512	NA
CAD	DM	2	CENPA	protein_coding	non-coding intronic	26995082	rs76508715	T	C	T	36749	0.905594	0.0765474	0.195163	NA
CAD	DM	2	SLC35F6	protein_coding	non-coding intronic,intronic	26995082	rs76508715	T	C	T	36749	0.905594	0.0765474	0.195163	NA
CAD	Overall	2	SLC35F6	protein_coding	3downstream,3utr	27003021	rs10186142	C	T	C	381974	1.01713	0.0135734	0.210743	NA
CAD	Overall	2	CENPA	protein_coding	non-coding intronic	27003021	rs10186142	C	T	C	381974	1.01713	0.0135734	0.210743	NA
CAD	noDM	2	SLC35F6	protein_coding	3downstream,3utr	27003021	rs10186142	C	T	C	345225	1.01626	0.0152568	0.290523	NA
CAD	noDM	2	CENPA	protein_coding	non-coding intronic	27003021	rs10186142	C	T	C	345225	1.01626	0.0152568	0.290523	NA
CAD	DM	2	SLC35F6	protein_coding	3downstream,3utr	27003021	rs10186142	C	T	C	36749	1.02167	0.0296471	0.469593	NA
CAD	DM	2	CENPA	protein_coding	non-coding intronic	27003021	rs10186142	C	T	C	36749	1.02167	0.0296471	0.469593	NA
CAD	Overall	2	MPV17	protein_coding	non-coding intronic,3downstream,intronic	27533048	rs115371897	T	C	T	381974	1.0629	0.0478555	0.20241	NA
CAD	noDM	2	MPV17	protein_coding	non-coding intronic,3downstream,intronic	27533048	rs115371897	T	C	T	345225	1.08366	0.0528781	0.128661	NA
CAD	DM	2	MPV17	protein_coding	non-coding intronic,3downstream,intronic	27533048	rs115371897	T	C	T	36749	0.974933	0.111753	0.820294	NA
CAD	Overall	2	MPV17	protein_coding	non-coding intronic,3downstream,intronic	27533116	rs187628677	C	A	C	381974	0.952833	0.0468245	0.302147	NA
CAD	noDM	2	MPV17	protein_coding	non-coding intronic,3downstream,intronic	27533116	rs187628677	C	A	C	345225	0.99001	0.0521026	0.847188	NA
CAD	DM	2	MPV17	protein_coding	non-coding intronic,3downstream,intronic	27533116	rs187628677	C	A	C	36749	0.820092	0.105746	0.0607089	NA
CAD	Overall	2	MPV17	protein_coding	3utr,non-coding intronic,intronic,3downstream	27538635	rs35686293	A	G	A	381974	1.0122	0.0291353	0.67728	NA
CAD	noDM	2	MPV17	protein_coding	3utr,non-coding intronic,intronic,3downstream	27538635	rs35686293	A	G	A	345225	1.01441	0.0326685	0.661466	NA
CAD	DM	2	MPV17	protein_coding	3utr,non-coding intronic,intronic,3downstream	27538635	rs35686293	A	G	A	36749	1.00608	0.0641965	0.924813	NA
CAD	Overall	2	MPV17	protein_coding	3downstream,non-coding intronic,intronic	27543209	rs145680464	AT	A	AT	381974	0.999292	0.0216608	0.973923	NA
CAD	noDM	2	MPV17	protein_coding	3downstream,non-coding intronic,intronic	27543209	rs145680464	AT	A	AT	345225	0.994785	0.0244281	0.830503	NA
CAD	DM	2	MPV17	protein_coding	3downstream,non-coding intronic,intronic	27543209	rs145680464	AT	A	AT	36749	1.01735	0.0467676	0.71298	NA
CAD	Overall	2	MPV17	protein_coding	3downstream,non-coding intronic,intronic	27544094	rs73924414	A	G	A	381974	1.03479	0.0335326	0.307789	NA
CAD	noDM	2	MPV17	protein_coding	3downstream,non-coding intronic,intronic	27544094	rs73924414	A	G	A	345225	1.03525	0.0376797	0.357913	NA
CAD	DM	2	MPV17	protein_coding	3downstream,non-coding intronic,intronic	27544094	rs73924414	A	G	A	36749	1.03091	0.0733276	0.678064	NA
CAD	Overall	2	MPV17	protein_coding	non-coding intronic,intronic,3downstream	27544713	rs189682050	C	A	C	381974	1.03896	0.0585491	0.513862	NA
CAD	noDM	2	MPV17	protein_coding	non-coding intronic,intronic,3downstream	27544713	rs189682050	C	A	C	345225	1.04528	0.0655093	0.499029	NA
CAD	DM	2	MPV17	protein_coding	non-coding intronic,intronic,3downstream	27544713	rs189682050	C	A	C	36749	1.01047	0.130036	0.936173	NA
CAD	Overall	2	GCKR	protein_coding	3downstream,intronic,non-coding intronic	27724535	rs8179210	G	C	G	381974	1.11444	0.0447798	0.0155339	NA
CAD	noDM	2	GCKR	protein_coding	3downstream,intronic,non-coding intronic	27724535	rs8179210	G	C	G	345225	1.09225	0.0503675	0.0798032	NA
CAD	DM	2	GCKR	protein_coding	3downstream,intronic,non-coding intronic	27724535	rs8179210	G	C	G	36749	1.2081	0.0981482	0.05409	NA
CAD	Overall	2	GCKR	protein_coding	3downstream,non-coding,coding nonsyn	27730940	rs1260326	C	T	T	381974	1.03506	0.0132366	0.00922903	NA
CAD	noDM	2	GCKR	protein_coding	3downstream,non-coding,coding nonsyn	27730940	rs1260326	C	T	T	345225	1.05051	0.0148557	0.000909944	NA
CAD	DM	2	GCKR	protein_coding	3downstream,non-coding,coding nonsyn	27730940	rs1260326	C	T	T	36749	0.977577	0.0290991	0.435784	NA
CAD	Overall	2	GCKR	protein_coding	3downstream,intronic	27732845	rs116361102	A	G	A	381974	1.01256	0.040822	0.759708	NA
CAD	noDM	2	GCKR	protein_coding	3downstream,intronic	27732845	rs116361102	A	G	A	345225	1.02721	0.0453363	0.553788	NA
CAD	DM	2	GCKR	protein_coding	3downstream,intronic	27732845	rs116361102	A	G	A	36749	0.949126	0.0931856	0.575261	NA
CAD	Overall	2	GCKR	protein_coding	intronic	27735033	rs141428740	A	G	A	381974	1.0478	0.0278146	0.0932311	NA
CAD	noDM	2	GCKR	protein_coding	intronic	27735033	rs141428740	A	G	A	345225	1.05741	0.0311158	0.0728178	NA
CAD	DM	2	GCKR	protein_coding	intronic	27735033	rs141428740	A	G	A	36749	1.01337	0.0617808	0.829732	NA
CAD	Overall	2	GCKR	protein_coding	intronic	27739306	rs12472643	T	C	T	381974	0.986702	0.0225625	0.55294	NA
CAD	noDM	2	GCKR	protein_coding	intronic	27739306	rs12472643	T	C	T	345225	0.987081	0.0253963	0.608646	NA
CAD	DM	2	GCKR	protein_coding	intronic	27739306	rs12472643	T	C	T	36749	0.989451	0.0490049	0.828666	NA
CAD	Overall	2	GCKR	protein_coding	intronic	27745828	rs111882222	T	C	T	381974	0.97033	0.0466195	0.518243	NA
CAD	noDM	2	GCKR	protein_coding	intronic	27745828	rs111882222	T	C	T	345225	0.933662	0.053392	0.198581	NA
CAD	DM	2	GCKR	protein_coding	intronic	27745828	rs111882222	T	C	T	36749	1.10257	0.0961528	0.309849	NA
CAD	Overall	2	GPN1	protein_coding	intronic,3downstream,non-coding intronic	27855397	rs10173720	T	A	T	381974	0.991414	0.0157589	0.584257	NA
CAD	Overall	2	RP11-158I13.2	processed_transcript	non-coding intronic	27855397	rs10173720	T	A	T	381974	0.991414	0.0157589	0.584257	NA
CAD	Overall	2	ZNF512	protein_coding	intronic	27855397	rs10173720	T	A	T	381974	0.991414	0.0157589	0.584257	NA
CAD	noDM	2	GPN1	protein_coding	intronic,3downstream,non-coding intronic	27855397	rs10173720	T	A	T	345225	0.995485	0.0177463	0.798729	NA
CAD	noDM	2	RP11-158I13.2	processed_transcript	non-coding intronic	27855397	rs10173720	T	A	T	345225	0.995485	0.0177463	0.798729	NA
CAD	noDM	2	ZNF512	protein_coding	intronic	27855397	rs10173720	T	A	T	345225	0.995485	0.0177463	0.798729	NA
CAD	DM	2	GPN1	protein_coding	intronic,3downstream,non-coding intronic	27855397	rs10173720	T	A	T	36749	0.976002	0.03417	0.477161	NA
CAD	DM	2	RP11-158I13.2	processed_transcript	non-coding intronic	27855397	rs10173720	T	A	T	36749	0.976002	0.03417	0.477161	NA
CAD	DM	2	ZNF512	protein_coding	intronic	27855397	rs10173720	T	A	T	36749	0.976002	0.03417	0.477161	NA
CAD	Overall	2	GPN1	protein_coding	3downstream,3utr	27873326	rs8731	G	C	G	381974	0.991969	0.0157619	0.608928	NA
CAD	noDM	2	GPN1	protein_coding	3downstream,3utr	27873326	rs8731	G	C	G	345225	0.994777	0.0177515	0.767994	NA
CAD	DM	2	GPN1	protein_coding	3downstream,3utr	27873326	rs8731	G	C	G	36749	0.981036	0.0341694	0.57526	NA
CAD	Overall	2	MRPL33	protein_coding	5utr,5upstream	27994597	rs34796799	T	G	T	381974	1.05816	0.0346841	0.103099	NA
CAD	noDM	2	MRPL33	protein_coding	5utr,5upstream	27994597	rs34796799	T	G	T	345225	1.08265	0.0387849	0.0406039	NA
CAD	DM	2	MRPL33	protein_coding	5utr,5upstream	27994597	rs34796799	T	G	T	36749	0.97846	0.0769293	0.777133	NA
CAD	Overall	2	AC110084.1	protein_coding	intronic	28001745	rs77829337	A	G	A	381974	1.10961	0.0622145	0.0945796	NA
CAD	Overall	2	MRPL33	protein_coding	non-coding intronic,intronic	28001745	rs77829337	A	G	A	381974	1.10961	0.0622145	0.0945796	NA
CAD	noDM	2	AC110084.1	protein_coding	intronic	28001745	rs77829337	A	G	A	345225	1.08353	0.0704373	0.254723	NA
CAD	noDM	2	MRPL33	protein_coding	non-coding intronic,intronic	28001745	rs77829337	A	G	A	345225	1.08353	0.0704373	0.254723	NA
CAD	DM	2	AC110084.1	protein_coding	intronic	28001745	rs77829337	A	G	A	36749	1.21515	0.133244	0.143604	NA
CAD	DM	2	MRPL33	protein_coding	non-coding intronic,intronic	28001745	rs77829337	A	G	A	36749	1.21515	0.133244	0.143604	NA
CAD	Overall	2	RBKS	protein_coding	intronic	28017486	rs565509271	C	T	C	381974	0.970326	0.0594174	0.612173	NA
CAD	Overall	2	MRPL33	protein_coding	intronic	28017486	rs565509271	C	T	C	381974	0.970326	0.0594174	0.612173	NA
CAD	noDM	2	RBKS	protein_coding	intronic	28017486	rs565509271	C	T	C	345225	0.926258	0.0682265	0.261536	NA
CAD	noDM	2	MRPL33	protein_coding	intronic	28017486	rs565509271	C	T	C	345225	0.926258	0.0682265	0.261536	NA
CAD	DM	2	RBKS	protein_coding	intronic	28017486	rs565509271	C	T	C	36749	1.14412	0.1218	0.268998	NA
CAD	DM	2	MRPL33	protein_coding	intronic	28017486	rs565509271	C	T	C	36749	1.14412	0.1218	0.268998	NA
CAD	Overall	2	RBKS	protein_coding	3downstream,intronic	28030735	rs114031902	G	A	G	381974	1.04195	0.0479217	0.39121	NA
CAD	Overall	2	MRPL33	protein_coding	intronic	28030735	rs114031902	G	A	G	381974	1.04195	0.0479217	0.39121	NA
CAD	noDM	2	RBKS	protein_coding	3downstream,intronic	28030735	rs114031902	G	A	G	345225	1.07319	0.053514	0.186848	NA
CAD	noDM	2	MRPL33	protein_coding	intronic	28030735	rs114031902	G	A	G	345225	1.07319	0.053514	0.186848	NA
CAD	DM	2	RBKS	protein_coding	3downstream,intronic	28030735	rs114031902	G	A	G	36749	0.936157	0.106775	0.536669	NA
CAD	DM	2	MRPL33	protein_coding	intronic	28030735	rs114031902	G	A	G	36749	0.936157	0.106775	0.536669	NA
CAD	Overall	2	MRPL33	protein_coding	intronic	28031825	rs75446579	C	G	C	381974	0.985512	0.0525052	0.781047	NA
CAD	Overall	2	RBKS	protein_coding	3downstream,intronic	28031825	rs75446579	C	G	C	381974	0.985512	0.0525052	0.781047	NA
CAD	noDM	2	MRPL33	protein_coding	intronic	28031825	rs75446579	C	G	C	345225	0.980141	0.0592824	0.735095	NA
CAD	noDM	2	RBKS	protein_coding	3downstream,intronic	28031825	rs75446579	C	G	C	345225	0.980141	0.0592824	0.735095	NA
CAD	DM	2	MRPL33	protein_coding	intronic	28031825	rs75446579	C	G	C	36749	1.00211	0.112935	0.985113	NA
CAD	DM	2	RBKS	protein_coding	3downstream,intronic	28031825	rs75446579	C	G	C	36749	1.00211	0.112935	0.985113	NA
CAD	Overall	2	MRPL33	protein_coding	intronic	28037815	rs142921279	TA	T	TA	381974	0.938048	0.0483254	0.185699	NA
CAD	Overall	2	RBKS	protein_coding	intronic	28037815	rs142921279	TA	T	TA	381974	0.938048	0.0483254	0.185699	NA
CAD	noDM	2	MRPL33	protein_coding	intronic	28037815	rs142921279	TA	T	TA	345225	0.95856	0.0541927	0.434813	NA
CAD	noDM	2	RBKS	protein_coding	intronic	28037815	rs142921279	TA	T	TA	345225	0.95856	0.0541927	0.434813	NA
CAD	DM	2	MRPL33	protein_coding	intronic	28037815	rs142921279	TA	T	TA	36749	0.863173	0.105938	0.164854	NA
CAD	DM	2	RBKS	protein_coding	intronic	28037815	rs142921279	TA	T	TA	36749	0.863173	0.105938	0.164854	NA
CAD	Overall	2	RBKS	protein_coding	intronic	28039665	rs4465729	C	T	C	381974	1.03793	0.0130853	0.00444346	NA
CAD	Overall	2	MRPL33	protein_coding	intronic	28039665	rs4465729	C	T	C	381974	1.03793	0.0130853	0.00444346	NA
CAD	noDM	2	RBKS	protein_coding	intronic	28039665	rs4465729	C	T	C	345225	1.04718	0.0146992	0.00171204	NA
CAD	noDM	2	MRPL33	protein_coding	intronic	28039665	rs4465729	C	T	C	345225	1.04718	0.0146992	0.00171204	NA
CAD	DM	2	RBKS	protein_coding	intronic	28039665	rs4465729	C	T	C	36749	1.00349	0.0286556	0.903199	NA
CAD	DM	2	MRPL33	protein_coding	intronic	28039665	rs4465729	C	T	C	36749	1.00349	0.0286556	0.903199	NA
CAD	Overall	2	MRPL33	protein_coding	intronic	28043391	rs74994332	C	T	C	381974	0.987144	0.0349764	0.711431	NA
CAD	Overall	2	RBKS	protein_coding	intronic	28043391	rs74994332	C	T	C	381974	0.987144	0.0349764	0.711431	NA
CAD	noDM	2	MRPL33	protein_coding	intronic	28043391	rs74994332	C	T	C	345225	0.977581	0.0395789	0.566717	NA
CAD	noDM	2	RBKS	protein_coding	intronic	28043391	rs74994332	C	T	C	345225	0.977581	0.0395789	0.566717	NA
CAD	DM	2	MRPL33	protein_coding	intronic	28043391	rs74994332	C	T	C	36749	1.02558	0.074705	0.735258	NA
CAD	DM	2	RBKS	protein_coding	intronic	28043391	rs74994332	C	T	C	36749	1.02558	0.074705	0.735258	NA
CAD	Overall	2	RBKS	protein_coding	intronic	28049020	rs56242350	G	A	G	381974	0.936717	0.0480831	0.173954	NA
CAD	Overall	2	MRPL33	protein_coding	intronic	28049020	rs56242350	G	A	G	381974	0.936717	0.0480831	0.173954	NA
CAD	noDM	2	RBKS	protein_coding	intronic	28049020	rs56242350	G	A	G	345225	0.960931	0.0538687	0.459413	NA
CAD	noDM	2	MRPL33	protein_coding	intronic	28049020	rs56242350	G	A	G	345225	0.960931	0.0538687	0.459413	NA
CAD	DM	2	RBKS	protein_coding	intronic	28049020	rs56242350	G	A	G	36749	0.849654	0.10571	0.123255	NA
CAD	DM	2	MRPL33	protein_coding	intronic	28049020	rs56242350	G	A	G	36749	0.849654	0.10571	0.123255	NA
CAD	Overall	2	RBKS	protein_coding	intronic	28065344	rs114225310	A	G	A	381974	1.01387	0.0423462	0.74492	NA
CAD	Overall	2	MRPL33	protein_coding	intronic	28065344	rs114225310	A	G	A	381974	1.01387	0.0423462	0.74492	NA
CAD	noDM	2	RBKS	protein_coding	intronic	28065344	rs114225310	A	G	A	345225	0.981114	0.0482698	0.692845	NA
CAD	noDM	2	MRPL33	protein_coding	intronic	28065344	rs114225310	A	G	A	345225	0.981114	0.0482698	0.692845	NA
CAD	DM	2	RBKS	protein_coding	intronic	28065344	rs114225310	A	G	A	36749	1.1389	0.0887653	0.142844	NA
CAD	DM	2	MRPL33	protein_coding	intronic	28065344	rs114225310	A	G	A	36749	1.1389	0.0887653	0.142844	NA
CAD	Overall	2	MRPL33	protein_coding	intronic	28090343	rs76414065	C	A	C	381974	1.02189	0.0410235	0.597629	NA
CAD	Overall	2	RBKS	protein_coding	intronic	28090343	rs76414065	C	A	C	381974	1.02189	0.0410235	0.597629	NA
CAD	noDM	2	MRPL33	protein_coding	intronic	28090343	rs76414065	C	A	C	345225	0.981825	0.0468707	0.69555	NA
CAD	noDM	2	RBKS	protein_coding	intronic	28090343	rs76414065	C	A	C	345225	0.981825	0.0468707	0.69555	NA
CAD	DM	2	MRPL33	protein_coding	intronic	28090343	rs76414065	C	A	C	36749	1.17654	0.0854923	0.0572089	NA
CAD	DM	2	RBKS	protein_coding	intronic	28090343	rs76414065	C	A	C	36749	1.17654	0.0854923	0.0572089	NA
CAD	Overall	2	RBKS	protein_coding	intronic	28100166	rs182760615	G	C	G	381974	0.942752	0.0481108	0.220448	NA
CAD	Overall	2	MRPL33	protein_coding	intronic	28100166	rs182760615	G	C	G	381974	0.942752	0.0481108	0.220448	NA
CAD	noDM	2	RBKS	protein_coding	intronic	28100166	rs182760615	G	C	G	345225	0.940433	0.0542206	0.257343	NA
CAD	noDM	2	MRPL33	protein_coding	intronic	28100166	rs182760615	G	C	G	345225	0.940433	0.0542206	0.257343	NA
CAD	DM	2	RBKS	protein_coding	intronic	28100166	rs182760615	G	C	G	36749	0.951903	0.104115	0.6359	NA
CAD	DM	2	MRPL33	protein_coding	intronic	28100166	rs182760615	G	C	G	36749	0.951903	0.104115	0.6359	NA
CAD	Overall	2	MRPL33	protein_coding	intronic	28102495	rs77841344	A	G	A	381974	1.04475	0.0512941	0.393449	NA
CAD	Overall	2	RBKS	protein_coding	intronic	28102495	rs77841344	A	G	A	381974	1.04475	0.0512941	0.393449	NA
CAD	noDM	2	MRPL33	protein_coding	intronic	28102495	rs77841344	A	G	A	345225	1.07071	0.0567666	0.228784	NA
CAD	noDM	2	RBKS	protein_coding	intronic	28102495	rs77841344	A	G	A	345225	1.07071	0.0567666	0.228784	NA
CAD	DM	2	MRPL33	protein_coding	intronic	28102495	rs77841344	A	G	A	36749	0.939004	0.11876	0.596153	NA
CAD	DM	2	RBKS	protein_coding	intronic	28102495	rs77841344	A	G	A	36749	0.939004	0.11876	0.596153	NA
CAD	Overall	2	BRE	protein_coding	intronic,5upstream,non-coding intronic	28116885	rs541694097	G	A	G	381974	1.06926	0.0557371	0.229594	NA
CAD	Overall	2	MRPL33	protein_coding	intronic	28116885	rs541694097	G	A	G	381974	1.06926	0.0557371	0.229594	NA
CAD	noDM	2	BRE	protein_coding	intronic,5upstream,non-coding intronic	28116885	rs541694097	G	A	G	345225	1.10543	0.061446	0.102849	NA
CAD	noDM	2	MRPL33	protein_coding	intronic	28116885	rs541694097	G	A	G	345225	1.10543	0.061446	0.102849	NA
CAD	DM	2	BRE	protein_coding	intronic,5upstream,non-coding intronic	28116885	rs541694097	G	A	G	36749	0.929398	0.131163	0.576692	NA
CAD	DM	2	MRPL33	protein_coding	intronic	28116885	rs541694097	G	A	G	36749	0.929398	0.131163	0.576692	NA
CAD	Overall	2	MRPL33	protein_coding	intronic	28128426	rs72810578	A	G	A	381974	0.962364	0.0421185	0.362389	NA
CAD	Overall	2	BRE	protein_coding	intronic,non-coding intronic	28128426	rs72810578	A	G	A	381974	0.962364	0.0421185	0.362389	NA
CAD	noDM	2	MRPL33	protein_coding	intronic	28128426	rs72810578	A	G	A	345225	0.94666	0.0475878	0.249368	NA
CAD	noDM	2	BRE	protein_coding	intronic,non-coding intronic	28128426	rs72810578	A	G	A	345225	0.94666	0.0475878	0.249368	NA
CAD	DM	2	MRPL33	protein_coding	intronic	28128426	rs72810578	A	G	A	36749	1.02277	0.0905454	0.80364	NA
CAD	DM	2	BRE	protein_coding	intronic,non-coding intronic	28128426	rs72810578	A	G	A	36749	1.02277	0.0905454	0.80364	NA
CAD	Overall	2	BRE	protein_coding	intronic,non-coding intronic	28128711	rs115682245	T	C	T	381974	1.05395	0.0450748	0.243758	NA
CAD	Overall	2	MRPL33	protein_coding	intronic	28128711	rs115682245	T	C	T	381974	1.05395	0.0450748	0.243758	NA
CAD	noDM	2	BRE	protein_coding	intronic,non-coding intronic	28128711	rs115682245	T	C	T	345225	1.06995	0.0498706	0.175209	NA
CAD	noDM	2	MRPL33	protein_coding	intronic	28128711	rs115682245	T	C	T	345225	1.06995	0.0498706	0.175209	NA
CAD	DM	2	BRE	protein_coding	intronic,non-coding intronic	28128711	rs115682245	T	C	T	36749	0.985412	0.104845	0.888529	NA
CAD	DM	2	MRPL33	protein_coding	intronic	28128711	rs115682245	T	C	T	36749	0.985412	0.104845	0.888529	NA
CAD	Overall	2	MRPL33	protein_coding	intronic	28136911	rs116769126	A	G	A	381974	0.950233	0.030054	0.089403	NA
CAD	Overall	2	BRE	protein_coding	intronic,non-coding intronic	28136911	rs116769126	A	G	A	381974	0.950233	0.030054	0.089403	NA
CAD	noDM	2	MRPL33	protein_coding	intronic	28136911	rs116769126	A	G	A	345225	0.944989	0.0338392	0.0945091	NA
CAD	noDM	2	BRE	protein_coding	intronic,non-coding intronic	28136911	rs116769126	A	G	A	345225	0.944989	0.0338392	0.0945091	NA
CAD	DM	2	MRPL33	protein_coding	intronic	28136911	rs116769126	A	G	A	36749	0.972754	0.0653557	0.672534	NA
CAD	DM	2	BRE	protein_coding	intronic,non-coding intronic	28136911	rs116769126	A	G	A	36749	0.972754	0.0653557	0.672534	NA
CAD	Overall	2	BRE	protein_coding	non-coding intronic,intronic	28165568	rs147417158	G	T	G	381974	1.03453	0.0657384	0.605605	NA
CAD	Overall	2	MRPL33	protein_coding	intronic	28165568	rs147417158	G	T	G	381974	1.03453	0.0657384	0.605605	NA
CAD	noDM	2	BRE	protein_coding	non-coding intronic,intronic	28165568	rs147417158	G	T	G	345225	1.09051	0.0728642	0.234368	NA
CAD	noDM	2	MRPL33	protein_coding	intronic	28165568	rs147417158	G	T	G	345225	1.09051	0.0728642	0.234368	NA
CAD	DM	2	BRE	protein_coding	non-coding intronic,intronic	28165568	rs147417158	G	T	G	36749	0.846053	0.150267	0.26592	NA
CAD	DM	2	MRPL33	protein_coding	intronic	28165568	rs147417158	G	T	G	36749	0.846053	0.150267	0.26592	NA
CAD	Overall	2	MRPL33	protein_coding	intronic	28187137	rs56410752	T	C	T	381974	0.990801	0.0144909	0.523646	NA
CAD	Overall	2	BRE	protein_coding	intronic,non-coding intronic	28187137	rs56410752	T	C	T	381974	0.990801	0.0144909	0.523646	NA
CAD	noDM	2	MRPL33	protein_coding	intronic	28187137	rs56410752	T	C	T	345225	0.977737	0.0163286	0.167944	NA
CAD	noDM	2	BRE	protein_coding	intronic,non-coding intronic	28187137	rs56410752	T	C	T	345225	0.977737	0.0163286	0.167944	NA
CAD	DM	2	MRPL33	protein_coding	intronic	28187137	rs56410752	T	C	T	36749	1.04063	0.0314196	0.204993	NA
CAD	DM	2	BRE	protein_coding	intronic,non-coding intronic	28187137	rs56410752	T	C	T	36749	1.04063	0.0314196	0.204993	NA
CAD	Overall	2	MRPL33	protein_coding	intronic	28189637	rs145482534	T	G	T	381974	1.00147	0.0336413	0.965199	NA
CAD	Overall	2	BRE	protein_coding	intronic,non-coding intronic	28189637	rs145482534	T	G	T	381974	1.00147	0.0336413	0.965199	NA
CAD	noDM	2	MRPL33	protein_coding	intronic	28189637	rs145482534	T	G	T	345225	0.98906	0.0378424	0.771296	NA
CAD	noDM	2	BRE	protein_coding	intronic,non-coding intronic	28189637	rs145482534	T	G	T	345225	0.98906	0.0378424	0.771296	NA
CAD	DM	2	MRPL33	protein_coding	intronic	28189637	rs145482534	T	G	T	36749	1.05072	0.0734888	0.500782	NA
CAD	DM	2	BRE	protein_coding	intronic,non-coding intronic	28189637	rs145482534	T	G	T	36749	1.05072	0.0734888	0.500782	NA
CAD	Overall	2	TRMT61B	protein_coding	intronic	29088338	rs10179580	G	T	T	381974	0.969261	0.0130076	0.0163845	NA
CAD	noDM	2	TRMT61B	protein_coding	intronic	29088338	rs10179580	G	T	T	345225	0.963497	0.014639	0.0110779	NA
CAD	DM	2	TRMT61B	protein_coding	intronic	29088338	rs10179580	G	T	T	36749	0.990592	0.0282745	0.738133	NA
CAD	Overall	2	TTC27	protein_coding	intronic	32937346	rs74261852	A	G	A	381974	0.985115	0.0262545	0.567858	NA
CAD	noDM	2	TTC27	protein_coding	intronic	32937346	rs74261852	A	G	A	345225	1.0027	0.029283	0.926695	NA
CAD	DM	2	TTC27	protein_coding	intronic	32937346	rs74261852	A	G	A	36749	0.913389	0.0589931	0.124621	NA
CAD	Overall	2	NDUFAF7	protein_coding	non-coding intronic,intronic	37463620	rs2430494	T	G	G	381974	1.02377	0.0133133	0.0775815	NA
CAD	noDM	2	NDUFAF7	protein_coding	non-coding intronic,intronic	37463620	rs2430494	T	G	G	345225	1.01618	0.0149621	0.283456	NA
CAD	DM	2	NDUFAF7	protein_coding	non-coding intronic,intronic	37463620	rs2430494	T	G	G	36749	1.05343	0.0291131	0.0737955	NA
CAD	Overall	2	NDUFAF7	protein_coding	intronic,3downstream	37476688	rs56059847	G	C	G	381974	0.961355	0.0179904	0.0284754	NA
CAD	noDM	2	NDUFAF7	protein_coding	intronic,3downstream	37476688	rs56059847	G	C	G	345225	0.979303	0.0201054	0.298223	NA
CAD	DM	2	NDUFAF7	protein_coding	intronic,3downstream	37476688	rs56059847	G	C	G	36749	0.896888	0.0400924	0.00664075	NA
CAD	Overall	2	NDUFAF7	protein_coding	intronic,3downstream	37477169	rs374474201	AT	A	AT	381974	0.983307	0.0231981	0.468044	NA
CAD	noDM	2	NDUFAF7	protein_coding	intronic,3downstream	37477169	rs374474201	AT	A	AT	345225	1.00391	0.0258738	0.880045	NA
CAD	DM	2	NDUFAF7	protein_coding	intronic,3downstream	37477169	rs374474201	AT	A	AT	36749	0.906894	0.05204	0.0603841	NA
CAD	Overall	2	SLC8A1	protein_coding	intronic	40577162	rs12611608	C	G	C	381974	1.00111	0.0130309	0.931913	NA
CAD	noDM	2	SLC8A1	protein_coding	intronic	40577162	rs12611608	C	G	C	345225	1.00117	0.0146347	0.936091	NA
CAD	DM	2	SLC8A1	protein_coding	intronic	40577162	rs12611608	C	G	C	36749	1.00119	0.0285583	0.966768	NA
CAD	Overall	2	SLC8A1	protein_coding	intronic	40578036	rs12989852	A	G	A	381974	1.00394	0.0132329	0.766075	NA
CAD	noDM	2	SLC8A1	protein_coding	intronic	40578036	rs12989852	A	G	A	345225	1.00703	0.0148634	0.637213	NA
CAD	DM	2	SLC8A1	protein_coding	intronic	40578036	rs12989852	A	G	A	36749	0.992188	0.0289835	0.786704	NA
CAD	Overall	2	LRPPRC	protein_coding	intronic,non-coding intronic	44125185	rs17031754	A	T	A	381974	0.984573	0.018851	0.409529	NA
CAD	noDM	2	LRPPRC	protein_coding	intronic,non-coding intronic	44125185	rs17031754	A	T	A	345225	0.964412	0.0212995	0.0888896	NA
CAD	DM	2	LRPPRC	protein_coding	intronic,non-coding intronic	44125185	rs17031754	A	T	A	36749	1.06718	0.040576	0.109048	NA
CAD	Overall	2	LRPPRC	protein_coding	intronic	44166222	rs192596395	C	T	C	381974	1.02543	0.0415681	0.545714	NA
CAD	noDM	2	LRPPRC	protein_coding	intronic	44166222	rs192596395	C	T	C	345225	1.04091	0.0463429	0.386935	NA
CAD	DM	2	LRPPRC	protein_coding	intronic	44166222	rs192596395	C	T	C	36749	0.967823	0.0934829	0.726446	NA
CAD	Overall	2	LRPPRC	protein_coding	intronic	44216369	rs115933697	A	T	A	381974	1.01353	0.0367763	0.714872	NA
CAD	noDM	2	LRPPRC	protein_coding	intronic	44216369	rs115933697	A	T	A	345225	1.0273	0.0409607	0.510747	NA
CAD	DM	2	LRPPRC	protein_coding	intronic	44216369	rs115933697	A	T	A	36749	0.956967	0.0831226	0.596684	NA
CAD	Overall	2	PREPL	protein_coding	intronic,non-coding intronic	44576049	rs72804944	A	T	A	381974	0.968729	0.0515205	0.537465	NA
CAD	noDM	2	PREPL	protein_coding	intronic,non-coding intronic	44576049	rs72804944	A	T	A	345225	0.973916	0.0580094	0.648659	NA
CAD	DM	2	PREPL	protein_coding	intronic,non-coding intronic	44576049	rs72804944	A	T	A	36749	0.953563	0.111713	0.670365	NA
CAD	Overall	2	PRKCE	protein_coding	5utr,5upstream	45878760	rs687914	T	G	T	381974	1.03259	0.014939	0.0318212	NA
CAD	noDM	2	PRKCE	protein_coding	5utr,5upstream	45878760	rs687914	T	G	T	345225	1.02814	0.0168122	0.0988248	NA
CAD	DM	2	PRKCE	protein_coding	5utr,5upstream	45878760	rs687914	T	G	T	36749	1.04765	0.0325138	0.152254	NA
CAD	Overall	2	PRKCE	protein_coding	non-coding intronic,intronic	45883832	rs56104374	G	A	G	381974	0.951215	0.0220981	0.0236159	NA
CAD	noDM	2	PRKCE	protein_coding	non-coding intronic,intronic	45883832	rs56104374	G	A	G	345225	0.956612	0.0247875	0.0735305	NA
CAD	DM	2	PRKCE	protein_coding	non-coding intronic,intronic	45883832	rs56104374	G	A	G	36749	0.931732	0.0486173	0.14583	NA
CAD	Overall	2	PRKCE	protein_coding	intronic,non-coding intronic	45905193	rs513386	T	A	T	381974	1.00888	0.014462	0.541055	NA
CAD	noDM	2	PRKCE	protein_coding	intronic,non-coding intronic	45905193	rs513386	T	A	T	345225	1.00233	0.0162719	0.886196	NA
CAD	DM	2	PRKCE	protein_coding	intronic,non-coding intronic	45905193	rs513386	T	A	T	36749	1.03321	0.0315057	0.299774	NA
CAD	Overall	2	PRKCE	protein_coding	non-coding intronic,intronic	46355051	rs4953318	C	A	C	381974	1.00012	0.01351	0.992901	NA
CAD	noDM	2	PRKCE	protein_coding	non-coding intronic,intronic	46355051	rs4953318	C	A	C	345225	0.997802	0.0152104	0.884954	NA
CAD	DM	2	PRKCE	protein_coding	non-coding intronic,intronic	46355051	rs4953318	C	A	C	36749	1.00949	0.0293518	0.747676	NA
CAD	Overall	2	EML6	protein_coding	non-coding intronic,intronic	55179006	rs7566508	A	C	C	381974	1.00308	0.013234	0.816002	NA
CAD	noDM	2	EML6	protein_coding	non-coding intronic,intronic	55179006	rs7566508	A	C	C	345225	1.01283	0.01486	0.390848	NA
CAD	DM	2	EML6	protein_coding	non-coding intronic,intronic	55179006	rs7566508	A	C	C	36749	0.966692	0.0290248	0.243164	NA
CAD	Overall	2	EML6	protein_coding	intronic,5upstream,non-coding intronic	55179365	rs7569471	T	C	C	381974	1.0029	0.0132337	0.826677	NA
CAD	noDM	2	EML6	protein_coding	intronic,5upstream,non-coding intronic	55179365	rs7569471	T	C	C	345225	1.0129	0.0148604	0.388383	NA
CAD	DM	2	EML6	protein_coding	intronic,5upstream,non-coding intronic	55179365	rs7569471	T	C	C	36749	0.965511	0.0290203	0.226506	NA
CAD	Overall	2	PNPT1	protein_coding	intronic	55888612	rs7596377	A	T	A	381974	0.998299	0.0132917	0.89807	NA
CAD	noDM	2	PNPT1	protein_coding	intronic	55888612	rs7596377	A	T	A	345225	1.00629	0.0149552	0.675057	NA
CAD	DM	2	PNPT1	protein_coding	intronic	55888612	rs7596377	A	T	A	36749	0.969834	0.0289323	0.289736	NA
CAD	Overall	2	VRK2	protein_coding	non-coding intronic,intronic	58175242	rs72808468	A	G	A	381974	0.963464	0.0259835	0.152015	NA
CAD	noDM	2	VRK2	protein_coding	non-coding intronic,intronic	58175242	rs72808468	A	G	A	345225	0.966201	0.0291957	0.238926	NA
CAD	DM	2	VRK2	protein_coding	non-coding intronic,intronic	58175242	rs72808468	A	G	A	36749	0.955248	0.0568082	0.420273	NA
CAD	Overall	2	VRK2	protein_coding	non-coding intronic,intronic	58223236	rs72808494	A	G	A	381974	0.993067	0.0222613	0.754649	NA
CAD	noDM	2	VRK2	protein_coding	non-coding intronic,intronic	58223236	rs72808494	A	G	A	345225	0.980875	0.0250891	0.44149	NA
CAD	DM	2	VRK2	protein_coding	non-coding intronic,intronic	58223236	rs72808494	A	G	A	36749	1.04108	0.0482792	0.404321	NA
CAD	Overall	2	VRK2	protein_coding	non-coding intronic,intronic	58228826	rs115659806	A	G	A	381974	0.986057	0.0226811	0.535882	NA
CAD	noDM	2	VRK2	protein_coding	non-coding intronic,intronic	58228826	rs115659806	A	G	A	345225	0.973242	0.025571	0.288841	NA
CAD	DM	2	VRK2	protein_coding	non-coding intronic,intronic	58228826	rs115659806	A	G	A	36749	1.0372	0.0491381	0.457273	NA
CAD	Overall	2	RAB1A	protein_coding	non-coding	65298282	rs2723087	A	T	A	381974	0.976199	0.0137829	0.0805132	NA
CAD	Overall	2	CEP68	protein_coding	non-coding intronic,non-coding,intronic	65298282	rs2723087	A	T	A	381974	0.976199	0.0137829	0.0805132	NA
CAD	noDM	2	RAB1A	protein_coding	non-coding	65298282	rs2723087	A	T	A	345225	0.983017	0.0154692	0.26817	NA
CAD	noDM	2	CEP68	protein_coding	non-coding intronic,non-coding,intronic	65298282	rs2723087	A	T	A	345225	0.983017	0.0154692	0.26817	NA
CAD	DM	2	RAB1A	protein_coding	non-coding	65298282	rs2723087	A	T	A	36749	0.950389	0.0302826	0.0928985	NA
CAD	DM	2	CEP68	protein_coding	non-coding intronic,non-coding,intronic	65298282	rs2723087	A	T	A	36749	0.950389	0.0302826	0.0928985	NA
CAD	Overall	2	RAB1A	protein_coding	non-coding intronic,intronic	65315903	rs1420185	A	G	G	381974	0.988206	0.0137963	0.38983	NA
CAD	noDM	2	RAB1A	protein_coding	non-coding intronic,intronic	65315903	rs1420185	A	G	G	345225	0.996227	0.0154758	0.807015	NA
CAD	DM	2	RAB1A	protein_coding	non-coding intronic,intronic	65315903	rs1420185	A	G	G	36749	0.958684	0.0303684	0.164711	NA
CAD	Overall	2	RAB1A	protein_coding	intronic,non-coding intronic	65345731	rs12465024	G	C	C	381974	0.987556	0.0138007	0.364241	NA
CAD	noDM	2	RAB1A	protein_coding	intronic,non-coding intronic	65345731	rs12465024	G	C	C	345225	0.995731	0.0154793	0.782268	NA
CAD	DM	2	RAB1A	protein_coding	intronic,non-coding intronic	65345731	rs12465024	G	C	C	36749	0.957439	0.0303885	0.152363	NA
CAD	Overall	2	RAB1A	protein_coding	intronic,non-coding intronic	65346974	rs201667812	AC	A	A	381974	0.98837	0.0137884	0.396206	NA
CAD	noDM	2	RAB1A	protein_coding	intronic,non-coding intronic	65346974	rs201667812	AC	A	A	345225	0.99775	0.0154639	0.884198	NA
CAD	DM	2	RAB1A	protein_coding	intronic,non-coding intronic	65346974	rs201667812	AC	A	A	36749	0.953591	0.0303747	0.117703	NA
CAD	Overall	2	NFU1	protein_coding	non-coding intronic,intronic	69656354	rs59129812	C	T	C	381974	0.991369	0.0168794	0.607571	NA
CAD	noDM	2	NFU1	protein_coding	non-coding intronic,intronic	69656354	rs59129812	C	T	C	345225	1.00038	0.0189346	0.983874	NA
CAD	DM	2	NFU1	protein_coding	non-coding intronic,intronic	69656354	rs59129812	C	T	C	36749	0.958479	0.0371182	0.25325	NA
CAD	Overall	2	RAB11FIP5	protein_coding	non-coding intronic	73383375	rs13414338	T	C	T	381974	0.993997	0.013661	0.659395	NA
CAD	noDM	2	RAB11FIP5	protein_coding	non-coding intronic	73383375	rs13414338	T	C	T	345225	0.991216	0.0153679	0.565903	NA
CAD	DM	2	RAB11FIP5	protein_coding	non-coding intronic	73383375	rs13414338	T	C	T	36749	1.00425	0.0297579	0.886797	NA
CAD	Overall	2	ELMOD3	protein_coding	intronic,non-coding intronic,3downstream	85584988	rs56352074	C	T	C	381974	1.00596	0.0134494	0.658807	NA
CAD	noDM	2	ELMOD3	protein_coding	intronic,non-coding intronic,3downstream	85584988	rs56352074	C	T	C	345225	1.00657	0.0151249	0.665255	NA
CAD	DM	2	ELMOD3	protein_coding	intronic,non-coding intronic,3downstream	85584988	rs56352074	C	T	C	36749	1.00624	0.0293343	0.83206	NA
CAD	Overall	2	ELMOD3	protein_coding	3downstream,5upstream,non-coding intronic,intronic	85615287	rs6707822	A	T	T	381974	0.993106	0.0138104	0.616451	NA
CAD	noDM	2	ELMOD3	protein_coding	3downstream,5upstream,non-coding intronic,intronic	85615287	rs6707822	A	T	T	345225	0.994769	0.0155075	0.735196	NA
CAD	DM	2	ELMOD3	protein_coding	3downstream,5upstream,non-coding intronic,intronic	85615287	rs6707822	A	T	T	36749	0.984535	0.0302848	0.606808	NA
CAD	Overall	2	VAMP8	protein_coding	intronic	85796961	rs532988600	CA	C	CA	381974	1.0669	0.0131825	9.01272e-07	NA
CAD	noDM	2	VAMP8	protein_coding	intronic	85796961	rs532988600	CA	C	CA	345225	1.0738	0.0148006	1.50397e-06	NA
CAD	DM	2	VAMP8	protein_coding	intronic	85796961	rs532988600	CA	C	CA	36749	1.04267	0.0289165	0.148462	NA
CAD	Overall	2	MRPL35	protein_coding	intronic	86427821	rs2059352	A	G	A	381974	0.985709	0.0136776	0.292606	NA
CAD	noDM	2	MRPL35	protein_coding	intronic	86427821	rs2059352	A	G	A	345225	1.00101	0.0153333	0.947544	NA
CAD	DM	2	MRPL35	protein_coding	intronic	86427821	rs2059352	A	G	A	36749	0.92981	0.0301642	0.0158384	NA
CAD	Overall	2	FAHD2A	protein_coding	3utr	96081230	rs3866290	C	T	C	381974	0.999775	0.0134777	0.986663	NA
CAD	noDM	2	FAHD2A	protein_coding	3utr	96081230	rs3866290	C	T	C	345225	0.996809	0.0151573	0.832989	NA
CAD	DM	2	FAHD2A	protein_coding	3utr	96081230	rs3866290	C	T	C	36749	1.01053	0.0293915	0.721582	NA
CAD	Overall	2	GPAT2	protein_coding	intronic,non-coding,non-coding intronic	96689334	rs2969473	C	G	C	381974	1.01073	0.0138584	0.441088	NA
CAD	noDM	2	GPAT2	protein_coding	intronic,non-coding,non-coding intronic	96689334	rs2969473	C	G	C	345225	1.00986	0.0155799	0.528848	NA
CAD	DM	2	GPAT2	protein_coding	intronic,non-coding,non-coding intronic	96689334	rs2969473	C	G	C	36749	1.01374	0.0302508	0.651826	NA
CAD	Overall	2	AFF3	protein_coding	non-coding intronic,intronic	100735304	rs3748927	T	C	T	381974	0.960858	0.0154441	0.00972756	NA
CAD	noDM	2	AFF3	protein_coding	non-coding intronic,intronic	100735304	rs3748927	T	C	T	345225	0.953454	0.0173802	0.00609904	NA
CAD	DM	2	AFF3	protein_coding	non-coding intronic,intronic	100735304	rs3748927	T	C	T	36749	0.989264	0.033624	0.748198	NA
CAD	Overall	2	BCL2L11	protein_coding	3downstream,intronic	111888043	rs72836348	A	G	A	381974	0.942891	0.0220966	0.0077845	NA
CAD	noDM	2	BCL2L11	protein_coding	3downstream,intronic	111888043	rs72836348	A	G	A	345225	0.945984	0.0247393	0.0247942	NA
CAD	DM	2	BCL2L11	protein_coding	3downstream,intronic	111888043	rs72836348	A	G	A	36749	0.931182	0.0489931	0.145582	NA
CAD	Overall	2	BCL2L11	protein_coding	intronic	111894720	rs17041868	C	T	C	381974	1.07152	0.0258369	0.00750085	NA
CAD	noDM	2	BCL2L11	protein_coding	intronic	111894720	rs17041868	C	T	C	345225	1.07215	0.0290984	0.0166556	NA
CAD	DM	2	BCL2L11	protein_coding	intronic	111894720	rs17041868	C	T	C	36749	1.0657	0.0559917	0.25574	NA
CAD	Overall	2	BCL2L11	protein_coding	intronic	111899881	rs3761706	A	G	A	381974	1.07082	0.0259396	0.00833965	NA
CAD	noDM	2	BCL2L11	protein_coding	intronic	111899881	rs3761706	A	G	A	345225	1.07095	0.0292158	0.01896	NA
CAD	DM	2	BCL2L11	protein_coding	intronic	111899881	rs3761706	A	G	A	36749	1.0665	0.0562062	0.252041	NA
CAD	Overall	2	BCL2L11	protein_coding	intronic	111909247	rs3789068	G	A	G	381974	0.976786	0.0130377	0.0716163	NA
CAD	noDM	2	BCL2L11	protein_coding	intronic	111909247	rs3789068	G	A	G	345225	0.980228	0.014639	0.172507	NA
CAD	DM	2	BCL2L11	protein_coding	intronic	111909247	rs3789068	G	A	G	36749	0.964376	0.0285904	0.204534	NA
CAD	Overall	2	PLA2R1	protein_coding	intronic	160914549	rs11901391	C	T	C	381974	0.993252	0.0166923	0.685032	NA
CAD	noDM	2	PLA2R1	protein_coding	intronic	160914549	rs11901391	C	T	C	345225	1.00596	0.0186819	0.75049	NA
CAD	DM	2	PLA2R1	protein_coding	intronic	160914549	rs11901391	C	T	C	36749	0.945739	0.0370339	0.131959	NA
CAD	Overall	2	PSMD14	protein_coding	intronic,non-coding,non-coding intronic	162265189	rs12471336	T	G	T	381974	0.952927	0.0244472	0.0485781	NA
CAD	noDM	2	PSMD14	protein_coding	intronic,non-coding,non-coding intronic	162265189	rs12471336	T	G	T	345225	0.979842	0.0272236	0.454445	NA
CAD	DM	2	PSMD14	protein_coding	intronic,non-coding,non-coding intronic	162265189	rs12471336	T	G	T	36749	0.856774	0.0551532	0.00506663	NA
CAD	Overall	2	IFIH1	protein_coding	intronic	163132346	rs78456138	T	C	T	381974	0.903827	0.0439841	0.0215072	NA
CAD	noDM	2	IFIH1	protein_coding	intronic	163132346	rs78456138	T	C	T	345225	0.880888	0.0499847	0.0111719	NA
CAD	DM	2	IFIH1	protein_coding	intronic	163132346	rs78456138	T	C	T	36749	0.995244	0.0928996	0.959072	NA
CAD	Overall	2	SLC25A12	protein_coding	5upstream,intronic	172646017	rs7604821	C	A	C	381974	0.971482	0.0138091	0.0361549	NA
CAD	noDM	2	SLC25A12	protein_coding	5upstream,intronic	172646017	rs7604821	C	A	C	345225	0.97556	0.0155172	0.110802	NA
CAD	DM	2	SLC25A12	protein_coding	5upstream,intronic	172646017	rs7604821	C	A	C	36749	0.955456	0.0302005	0.131352	NA
CAD	Overall	2	SLC25A12	protein_coding	intronic,5upstream	172668715	rs3770451	G	T	G	381974	0.97901	0.0144844	0.143042	NA
CAD	noDM	2	SLC25A12	protein_coding	intronic,5upstream	172668715	rs3770451	G	T	G	345225	0.980756	0.0162668	0.232255	NA
CAD	DM	2	SLC25A12	protein_coding	intronic,5upstream	172668715	rs3770451	G	T	G	36749	0.972067	0.0317333	0.371982	NA
CAD	Overall	2	SLC25A12	protein_coding	intronic,3downstream,non-coding intronic	172690265	rs908671	G	C	G	381974	0.979069	0.0143962	0.141741	NA
CAD	noDM	2	SLC25A12	protein_coding	intronic,3downstream,non-coding intronic	172690265	rs908671	G	C	G	345225	0.98467	0.0161559	0.338942	NA
CAD	DM	2	SLC25A12	protein_coding	intronic,3downstream,non-coding intronic	172690265	rs908671	G	C	G	36749	0.957522	0.0316165	0.169784	NA
CAD	Overall	2	ANKRD44	protein_coding	non-coding intronic,intronic	198145185	rs781683171	C	CT	C	381974	0.966829	0.0150773	0.0252616	NA
CAD	Overall	2	ANKRD44-IT1	sense_intronic	non-coding intronic	198145185	rs781683171	C	CT	C	381974	0.966829	0.0150773	0.0252616	NA
CAD	noDM	2	ANKRD44	protein_coding	non-coding intronic,intronic	198145185	rs781683171	C	CT	C	345225	0.953619	0.0170053	0.00522607	NA
CAD	noDM	2	ANKRD44-IT1	sense_intronic	non-coding intronic	198145185	rs781683171	C	CT	C	345225	0.953619	0.0170053	0.00522607	NA
CAD	DM	2	ANKRD44	protein_coding	non-coding intronic,intronic	198145185	rs781683171	C	CT	C	36749	1.01681	0.0325715	0.608726	NA
CAD	DM	2	ANKRD44-IT1	sense_intronic	non-coding intronic	198145185	rs781683171	C	CT	C	36749	1.01681	0.0325715	0.608726	NA
CAD	Overall	2	ICA1L	protein_coding	intronic	203649341	rs72932725	A	G	A	381974	1.14466	0.0187002	5.01882e-13	NA
CAD	noDM	2	ICA1L	protein_coding	intronic	203649341	rs72932725	A	G	A	345225	1.15851	0.0208816	1.8379e-12	NA
CAD	DM	2	ICA1L	protein_coding	intronic	203649341	rs72932725	A	G	A	36749	1.09134	0.041829	0.0366603	NA
CAD	Overall	2	ICA1L	protein_coding	intronic,3downstream,non-coding intronic	203683990	rs79633844	G	A	G	381974	1.14716	0.0186682	1.92339e-13	rs2036927(1),rs72932716(1),rs112806695(1),rs56193304(1),rs72932720(1),rs11675462(1),rs72932722(1),rs72932723(1),rs72932725(1),rs72932727(1),rs72932731(1),rs143911965(1),rs368863059(1),rs72932737(1),2:203655123_CTAT_C(1),rs6732078(1),rs6435168(1),rs72932741(1),rs6705330(1),rs72932745(1),rs72932746(1),rs78128841(1),rs76122535(1),rs72932752(1),rs72932753(1),rs144505847(1),rs80087860(1),rs74675536(1)…
CAD	noDM	2	ICA1L	protein_coding	intronic,3downstream,non-coding intronic	203683990	rs79633844	G	A	G	345225	1.16244	0.0208367	5.05382e-13	NA
CAD	DM	2	ICA1L	protein_coding	intronic,3downstream,non-coding intronic	203683990	rs79633844	G	A	G	36749	1.08854	0.0418212	0.0424994	NA
CAD	Overall	2	ICA1L	protein_coding	non-coding intronic,intronic	203704796	rs532184078	AT	A	AT	381974	0.972673	0.0150044	0.0648082	NA
CAD	noDM	2	ICA1L	protein_coding	non-coding intronic,intronic	203704796	rs532184078	AT	A	AT	345225	0.961492	0.0169297	0.0203675	NA
CAD	DM	2	ICA1L	protein_coding	non-coding intronic,intronic	203704796	rs532184078	AT	A	AT	36749	1.01501	0.0323815	0.645372	NA
CAD	Overall	2	ICA1L	protein_coding	non-coding intronic,intronic	203706530	rs4675300	C	G	C	381974	0.953168	0.0138904	0.000554301	NA
CAD	noDM	2	ICA1L	protein_coding	non-coding intronic,intronic	203706530	rs4675300	C	G	C	345225	0.936387	0.0156673	2.72714e-05	NA
CAD	DM	2	ICA1L	protein_coding	non-coding intronic,intronic	203706530	rs4675300	C	G	C	36749	1.01793	0.0300429	0.554183	NA
CAD	Overall	2	ICA1L	protein_coding	intronic,non-coding intronic	203726994	rs538755961	AC	A	A	381974	1.09473	0.016405	3.44176e-08	NA
CAD	noDM	2	ICA1L	protein_coding	intronic,non-coding intronic	203726994	rs538755961	AC	A	A	345225	1.11837	0.0183191	1.01595e-09	NA
CAD	DM	2	ICA1L	protein_coding	intronic,non-coding intronic	203726994	rs538755961	AC	A	A	36749	1.00801	0.0366772	0.82785	NA
CAD	Overall	2	ICA1L	protein_coding	intronic,non-coding intronic	203728984	rs186399184	T	C	T	381974	1.14932	0.0191405	3.56428e-13	NA
CAD	noDM	2	ICA1L	protein_coding	intronic,non-coding intronic	203728984	rs186399184	T	C	T	345225	1.16723	0.0213436	4.32459e-13	rs2036927(1),rs72932716(1),rs112806695(1),rs56193304(1),rs72932720(1),rs11675462(1),rs72932722(1),rs72932723(1),rs72932725(1),rs72932727(1),rs72932731(1),rs143911965(1),rs368863059(1),rs72932737(1),2:203655123_CTAT_C(1),rs6732078(1),rs6435168(1),rs72932741(1),rs6705330(1),rs72932745(1),rs72932746(1),rs78128841(1),rs76122535(1),rs72932752(1),rs72932753(1),rs144505847(1),rs80087860(1),rs74675536(1)…
CAD	DM	2	ICA1L	protein_coding	intronic,non-coding intronic	203728984	rs186399184	T	C	T	36749	1.08014	0.0430254	0.0731682	NA
CAD	Overall	2	ICA1L	protein_coding	intronic,5upstream,non-coding intronic	203734866	rs4510208	A	C	A	381974	1.14444	0.0186454	4.62948e-13	NA
CAD	noDM	2	ICA1L	protein_coding	intronic,5upstream,non-coding intronic	203734866	rs4510208	A	C	A	345225	1.1602	0.0208107	9.32079e-13	NA
CAD	DM	2	ICA1L	protein_coding	intronic,5upstream,non-coding intronic	203734866	rs4510208	A	C	A	36749	1.08391	0.041774	0.0537585	NA
CAD	Overall	2	CREB1	protein_coding	5utr,5upstream	208394531	rs2464976	T	G	T	381974	0.99638	0.0167933	0.82902	NA
CAD	noDM	2	CREB1	protein_coding	5utr,5upstream	208394531	rs2464976	T	G	T	345225	0.996789	0.0188686	0.864645	NA
CAD	DM	2	CREB1	protein_coding	5utr,5upstream	208394531	rs2464976	T	G	T	36749	0.994301	0.0367254	0.876328	NA
CAD	Overall	2	CREB1	protein_coding	non-coding intronic,intronic	208402750	rs4675682	C	T	C	381974	0.989518	0.0130342	0.418853	NA
CAD	noDM	2	CREB1	protein_coding	non-coding intronic,intronic	208402750	rs4675682	C	T	C	345225	0.98623	0.0146527	0.343983	NA
CAD	DM	2	CREB1	protein_coding	non-coding intronic,intronic	208402750	rs4675682	C	T	C	36749	1.00197	0.0284347	0.944912	NA
CAD	Overall	2	CREB1	protein_coding	non-coding intronic,intronic	208409339	rs2360970	C	G	C	381974	0.98885	0.0130434	0.39	NA
CAD	noDM	2	CREB1	protein_coding	non-coding intronic,intronic	208409339	rs2360970	C	G	C	345225	0.985358	0.0146642	0.314488	NA
CAD	DM	2	CREB1	protein_coding	non-coding intronic,intronic	208409339	rs2360970	C	G	C	36749	1.00204	0.0284454	0.942883	NA
CAD	Overall	2	CREB1	protein_coding	non-coding intronic,intronic	208412847	rs138246582	A	G	A	381974	1.02738	0.0254561	0.288562	NA
CAD	noDM	2	CREB1	protein_coding	non-coding intronic,intronic	208412847	rs138246582	A	G	A	345225	1.04468	0.0284261	0.124126	NA
CAD	DM	2	CREB1	protein_coding	non-coding intronic,intronic	208412847	rs138246582	A	G	A	36749	0.961597	0.0568769	0.491139	NA
CAD	Overall	2	CPS1	protein_coding	3downstream,intronic	211446121	rs10165443	T	C	C	381974	1.00029	0.0130409	0.982546	NA
CAD	noDM	2	CPS1	protein_coding	3downstream,intronic	211446121	rs10165443	T	C	C	345225	0.987057	0.0146781	0.374786	NA
CAD	DM	2	CPS1	protein_coding	3downstream,intronic	211446121	rs10165443	T	C	C	36749	1.0528	0.0283552	0.0696093	NA
CAD	Overall	2	CPS1	protein_coding	non-coding,coding nonsyn	211540507	rs1047891	A	C	A	381974	0.977789	0.0140223	0.109192	NA
CAD	noDM	2	CPS1	protein_coding	non-coding,coding nonsyn	211540507	rs1047891	A	C	A	345225	0.971866	0.0157937	0.0707775	NA
CAD	DM	2	CPS1	protein_coding	non-coding,coding nonsyn	211540507	rs1047891	A	C	A	36749	1.00273	0.0304148	0.928479	NA
CAD	Overall	2	FN1	protein_coding	intronic	216300185	rs1250258	T	C	C	381974	1.06315	0.0145771	2.65824e-05	NA
CAD	noDM	2	FN1	protein_coding	intronic	216300185	rs1250258	T	C	C	345225	1.06649	0.0163884	8.55744e-05	NA
CAD	DM	2	FN1	protein_coding	intronic	216300185	rs1250258	T	C	C	36749	1.05185	0.031803	0.11197	NA
CAD	Overall	2	FN1	protein_coding	coding nonsyn	216300482	rs1250259	A	T	T	381974	1.06383	0.0145721	2.17677e-05	NA
CAD	noDM	2	FN1	protein_coding	coding nonsyn	216300482	rs1250259	A	T	T	345225	1.0674	0.0163834	6.86118e-05	NA
CAD	DM	2	FN1	protein_coding	coding nonsyn	216300482	rs1250259	A	T	T	36749	1.05162	0.0317873	0.113327	NA
CAD	Overall	2	TMBIM1	protein_coding	intronic,non-coding,3downstream,non-coding intronic	219142773	rs6707559	T	C	C	381974	1.02702	0.0132093	0.0435777	NA
CAD	Overall	2	PNKD	protein_coding	non-coding intronic,intronic	219142773	rs6707559	T	C	C	381974	1.02702	0.0132093	0.0435777	NA
CAD	noDM	2	TMBIM1	protein_coding	intronic,non-coding,3downstream,non-coding intronic	219142773	rs6707559	T	C	C	345225	1.02708	0.0148333	0.0716724	NA
CAD	noDM	2	PNKD	protein_coding	non-coding intronic,intronic	219142773	rs6707559	T	C	C	345225	1.02708	0.0148333	0.0716724	NA
CAD	DM	2	TMBIM1	protein_coding	intronic,non-coding,3downstream,non-coding intronic	219142773	rs6707559	T	C	C	36749	1.02584	0.0289525	0.378245	NA
CAD	DM	2	PNKD	protein_coding	non-coding intronic,intronic	219142773	rs6707559	T	C	C	36749	1.02584	0.0289525	0.378245	NA
CAD	Overall	2	PNKD	protein_coding	non-coding intronic,intronic	219157692	rs10193383	T	C	C	381974	1.02324	0.013207	0.0819034	NA
CAD	noDM	2	PNKD	protein_coding	non-coding intronic,intronic	219157692	rs10193383	T	C	C	345225	1.02197	0.0148343	0.142999	NA
CAD	DM	2	PNKD	protein_coding	non-coding intronic,intronic	219157692	rs10193383	T	C	C	36749	1.02691	0.0289228	0.358526	NA
CAD	Overall	2	ZNF142	protein_coding	5utr,intronic	219524089	rs13011338	T	C	T	381974	0.910995	0.0378348	0.0137467	NA
CAD	Overall	2	BCS1L	protein_coding	5upstream,intronic	219524089	rs13011338	T	C	T	381974	0.910995	0.0378348	0.0137467	NA
CAD	noDM	2	ZNF142	protein_coding	5utr,intronic	219524089	rs13011338	T	C	T	345225	0.91444	0.0425848	0.0356965	NA
CAD	noDM	2	BCS1L	protein_coding	5upstream,intronic	219524089	rs13011338	T	C	T	345225	0.91444	0.0425848	0.0356965	NA
CAD	DM	2	ZNF142	protein_coding	5utr,intronic	219524089	rs13011338	T	C	T	36749	0.901596	0.0821598	0.207372	NA
CAD	DM	2	BCS1L	protein_coding	5upstream,intronic	219524089	rs13011338	T	C	T	36749	0.901596	0.0821598	0.207372	NA
CAD	Overall	2	TTLL4	protein_coding	intronic	219578361	rs6436066	G	T	G	381974	0.996964	0.0130676	0.815987	NA
CAD	noDM	2	TTLL4	protein_coding	intronic	219578361	rs6436066	G	T	G	345225	0.994476	0.0147031	0.706386	NA
CAD	DM	2	TTLL4	protein_coding	intronic	219578361	rs6436066	G	T	G	36749	1.00592	0.0284513	0.83564	NA
CAD	Overall	2	TTLL4	protein_coding	intronic	219590348	rs148358468	A	G	A	381974	1.06195	0.0292563	0.0399431	NA
CAD	noDM	2	TTLL4	protein_coding	intronic	219590348	rs148358468	A	G	A	345225	1.07541	0.0327205	0.0262967	NA
CAD	DM	2	TTLL4	protein_coding	intronic	219590348	rs148358468	A	G	A	36749	1.00954	0.0649974	0.883801	NA
CAD	Overall	2	TTLL4	protein_coding	intronic	219596321	rs62191629	A	G	A	381974	0.977743	0.0297459	0.449231	NA
CAD	noDM	2	TTLL4	protein_coding	intronic	219596321	rs62191629	A	G	A	345225	0.980876	0.0334239	0.563465	NA
CAD	DM	2	TTLL4	protein_coding	intronic	219596321	rs62191629	A	G	A	36749	0.968895	0.0650181	0.626967	NA
CAD	Overall	3	ATG7	protein_coding	intronic	11396100	rs9873503	C	T	T	381974	0.99171	0.013936	0.550258	NA
CAD	noDM	3	ATG7	protein_coding	intronic	11396100	rs9873503	C	T	T	345225	0.99041	0.0156692	0.538567	NA
CAD	DM	3	ATG7	protein_coding	intronic	11396100	rs9873503	C	T	T	36749	0.996537	0.0304089	0.909186	NA
CAD	Overall	3	ATG7	protein_coding	intronic	11396562	rs2606738	C	T	T	381974	0.996043	0.013806	0.773993	NA
CAD	noDM	3	ATG7	protein_coding	intronic	11396562	rs2606738	C	T	T	345225	0.994417	0.0155227	0.718332	NA
CAD	DM	3	ATG7	protein_coding	intronic	11396562	rs2606738	C	T	T	36749	1.00204	0.0301293	0.946081	NA
CAD	Overall	3	ATG7	protein_coding	intronic	11413429	rs7627171	C	G	G	381974	0.991495	0.0136659	0.53197	NA
CAD	noDM	3	ATG7	protein_coding	intronic	11413429	rs7627171	C	G	G	345225	0.985552	0.0153821	0.34409	NA
CAD	DM	3	ATG7	protein_coding	intronic	11413429	rs7627171	C	G	G	36749	1.01402	0.0297051	0.639186	NA
CAD	Overall	3	ATG7	protein_coding	intronic	11427455	rs7632040	G	A	A	381974	0.989426	0.0133314	0.42521	NA
CAD	noDM	3	ATG7	protein_coding	intronic	11427455	rs7632040	G	A	A	345225	0.981919	0.0150052	0.223987	NA
CAD	DM	3	ATG7	protein_coding	intronic	11427455	rs7632040	G	A	A	36749	1.01875	0.0289842	0.52163	NA
CAD	Overall	3	ATG7	protein_coding	intronic	11461863	rs9826803	A	G	G	381974	0.995853	0.0137943	0.763199	NA
CAD	noDM	3	ATG7	protein_coding	intronic	11461863	rs9826803	A	G	G	345225	0.9924	0.0155186	0.623013	NA
CAD	DM	3	ATG7	protein_coding	intronic	11461863	rs9826803	A	G	G	36749	1.00872	0.0300356	0.772465	NA
CAD	Overall	3	PPARG	protein_coding	5upstream,intronic,5utr	12329452	rs17029006	T	C	T	381974	0.975968	0.014785	0.0999124	NA
CAD	noDM	3	PPARG	protein_coding	5upstream,intronic,5utr	12329452	rs17029006	T	C	T	345225	0.970487	0.0166201	0.0714706	NA
CAD	DM	3	PPARG	protein_coding	5upstream,intronic,5utr	12329452	rs17029006	T	C	T	36749	0.996835	0.032307	0.921845	NA
CAD	Overall	3	PPARG	protein_coding	intronic,5utr,5upstream	12330411	rs17036170	A	G	A	381974	1.04293	0.0641805	0.512493	NA
CAD	noDM	3	PPARG	protein_coding	intronic,5utr,5upstream	12330411	rs17036170	A	G	A	345225	0.990638	0.0738404	0.898634	NA
CAD	DM	3	PPARG	protein_coding	intronic,5utr,5upstream	12330411	rs17036170	A	G	A	36749	1.23805	0.130717	0.102348	NA
CAD	Overall	3	PPARG	protein_coding	non-coding intronic,intronic	12351223	rs12485478	G	A	G	381974	1.08501	0.0398514	0.0406148	NA
CAD	noDM	3	PPARG	protein_coding	non-coding intronic,intronic	12351223	rs12485478	G	A	G	345225	1.0633	0.0452969	0.175394	NA
CAD	DM	3	PPARG	protein_coding	non-coding intronic,intronic	12351223	rs12485478	G	A	G	36749	1.16289	0.083968	0.0723037	NA
CAD	Overall	3	PPARG	protein_coding	intronic,non-coding intronic	12351521	rs35000407	G	T	G	381974	1.04061	0.019754	0.0439068	NA
CAD	noDM	3	PPARG	protein_coding	intronic,non-coding intronic	12351521	rs35000407	G	T	G	345225	1.0509	0.0220359	0.0242685	NA
CAD	DM	3	PPARG	protein_coding	intronic,non-coding intronic	12351521	rs35000407	G	T	G	36749	1.00019	0.0444217	0.996651	NA
CAD	Overall	3	PPARG	protein_coding	intronic,non-coding intronic	12359049	rs2067819	A	G	A	381974	1.01101	0.0157746	0.487435	NA
CAD	noDM	3	PPARG	protein_coding	intronic,non-coding intronic	12359049	rs2067819	A	G	A	345225	1.01612	0.017684	0.36581	NA
CAD	DM	3	PPARG	protein_coding	intronic,non-coding intronic	12359049	rs2067819	A	G	A	36749	0.99102	0.0348155	0.795558	NA
CAD	Overall	3	PPARG	protein_coding	intronic,non-coding intronic	12369401	rs13064760	T	C	T	381974	1.04029	0.0197676	0.0456869	NA
CAD	noDM	3	PPARG	protein_coding	intronic,non-coding intronic	12369401	rs13064760	T	C	T	345225	1.05059	0.0220505	0.025208	NA
CAD	DM	3	PPARG	protein_coding	intronic,non-coding intronic	12369401	rs13064760	T	C	T	36749	0.999769	0.0444565	0.995851	NA
CAD	Overall	3	PPARG	protein_coding	non-coding intronic,intronic	12396588	rs4135247	A	G	G	381974	0.989083	0.0131596	0.404195	NA
CAD	noDM	3	PPARG	protein_coding	non-coding intronic,intronic	12396588	rs4135247	A	G	G	345225	0.982268	0.0147915	0.226452	NA
CAD	DM	3	PPARG	protein_coding	non-coding intronic,intronic	12396588	rs4135247	A	G	G	36749	1.01577	0.0287568	0.586463	NA
CAD	Overall	3	PPARG	protein_coding	non-coding intronic,intronic	12396732	rs4135248	C	T	C	381974	1.00662	0.0418024	0.874595	NA
CAD	noDM	3	PPARG	protein_coding	non-coding intronic,intronic	12396732	rs4135248	C	T	C	345225	0.983439	0.0473885	0.724533	NA
CAD	DM	3	PPARG	protein_coding	non-coding intronic,intronic	12396732	rs4135248	C	T	C	36749	1.09735	0.0889959	0.29657	NA
CAD	Overall	3	PPARG	protein_coding	intronic,3downstream	12448940	rs709147	G	A	G	381974	0.994536	0.0133965	0.682572	NA
CAD	noDM	3	PPARG	protein_coding	intronic,3downstream	12448940	rs709147	G	A	G	345225	0.997325	0.0150503	0.858717	NA
CAD	DM	3	PPARG	protein_coding	intronic,3downstream	12448940	rs709147	G	A	G	36749	0.984142	0.0293236	0.585657	NA
CAD	Overall	3	PPARG	protein_coding	intronic	12451117	rs776435324	A	AGTGGCTATGGCTGT	A	381974	0.994376	0.0134135	0.674142	NA
CAD	noDM	3	PPARG	protein_coding	intronic	12451117	rs776435324	A	AGTGGCTATGGCTGT	A	345225	0.996984	0.0150685	0.841117	NA
CAD	DM	3	PPARG	protein_coding	intronic	12451117	rs776435324	A	AGTGGCTATGGCTGT	A	36749	0.984663	0.0293684	0.598704	NA
CAD	Overall	3	RAF1	protein_coding	intronic	12655927	rs35902148	GTA	G	G	381974	1.00321	0.0131032	0.806829	NA
CAD	noDM	3	RAF1	protein_coding	intronic	12655927	rs35902148	GTA	G	G	345225	1.0096	0.0147455	0.51688	NA
CAD	DM	3	RAF1	protein_coding	intronic	12655927	rs35902148	GTA	G	G	36749	0.979108	0.0285048	0.458873	NA
CAD	Overall	3	RAF1	protein_coding	intronic	12689451	rs55762590	T	C	T	381974	1.0052	0.016555	0.754097	NA
CAD	noDM	3	RAF1	protein_coding	intronic	12689451	rs55762590	T	C	T	345225	1.00571	0.0185902	0.759438	NA
CAD	DM	3	RAF1	protein_coding	intronic	12689451	rs55762590	T	C	T	36749	1.00212	0.0362971	0.953583	NA
CAD	Overall	3	RAF1	protein_coding	intronic	12701069	rs142536918	CAATAAAAGACCT	C	CAATAAAAGACCT	381974	0.98303	0.0140376	0.222755	NA
CAD	noDM	3	RAF1	protein_coding	intronic	12701069	rs142536918	CAATAAAAGACCT	C	CAATAAAAGACCT	345225	0.981509	0.0157769	0.236816	NA
CAD	DM	3	RAF1	protein_coding	intronic	12701069	rs142536918	CAATAAAAGACCT	C	CAATAAAAGACCT	36749	0.98828	0.0306914	0.7009	NA
CAD	Overall	3	BTD	protein_coding	non-coding intronic,intronic	15647537	rs547507925	C	G	C	381974	1.01377	0.0146271	0.349763	NA
CAD	noDM	3	BTD	protein_coding	non-coding intronic,intronic	15647537	rs547507925	C	G	C	345225	1.01708	0.0164282	0.302483	NA
CAD	DM	3	BTD	protein_coding	non-coding intronic,intronic	15647537	rs547507925	C	G	C	36749	1.00058	0.0320243	0.985595	NA
CAD	Overall	3	BTD	protein_coding	non-coding intronic,intronic	15681940	rs2455821	A	C	A	381974	1.01226	0.0145558	0.402337	NA
CAD	noDM	3	BTD	protein_coding	non-coding intronic,intronic	15681940	rs2455821	A	C	A	345225	1.01453	0.0163557	0.377709	NA
CAD	DM	3	BTD	protein_coding	non-coding intronic,intronic	15681940	rs2455821	A	C	A	36749	1.0034	0.0318217	0.915065	NA
CAD	Overall	3	BTD	protein_coding	coding nonsyn,3downstream	15686534	rs35034250	T	C	T	381974	0.954867	0.0399704	0.247916	NA
CAD	noDM	3	BTD	protein_coding	coding nonsyn,3downstream	15686534	rs35034250	T	C	T	345225	0.912321	0.0455405	0.0439055	NA
CAD	DM	3	BTD	protein_coding	coding nonsyn,3downstream	15686534	rs35034250	T	C	T	36749	1.12705	0.0841626	0.155289	NA
CAD	Overall	3	MLH1	protein_coding	non-coding intronic,intronic	37036099	rs3836491	AG	A	AG	381974	0.999668	0.0130276	0.979691	NA
CAD	noDM	3	MLH1	protein_coding	non-coding intronic,intronic	37036099	rs3836491	AG	A	AG	345225	1.00533	0.0146493	0.716486	NA
CAD	DM	3	MLH1	protein_coding	non-coding intronic,intronic	37036099	rs3836491	AG	A	AG	36749	0.977178	0.0284229	0.416642	NA
CAD	Overall	3	ULK4	protein_coding	intronic,non-coding intronic	41306063	rs4973930	C	A	A	381974	0.991703	0.013015	0.522093	NA
CAD	noDM	3	ULK4	protein_coding	intronic,non-coding intronic	41306063	rs4973930	C	A	A	345225	0.997813	0.0146393	0.881112	NA
CAD	DM	3	ULK4	protein_coding	intronic,non-coding intronic	41306063	rs4973930	C	A	A	36749	0.969034	0.0283607	0.267377	NA
CAD	Overall	3	ULK4	protein_coding	intronic	41672700	rs75008287	A	G	A	381974	0.955417	0.0426459	0.284872	NA
CAD	noDM	3	ULK4	protein_coding	intronic	41672700	rs75008287	A	G	A	345225	0.909094	0.0489968	0.0517547	NA
CAD	DM	3	ULK4	protein_coding	intronic	41672700	rs75008287	A	G	A	36749	1.13695	0.0873539	0.141763	NA
CAD	Overall	3	ULK4	protein_coding	intronic,non-coding intronic	41865999	rs111574393	G	C	G	381974	0.984689	0.0181316	0.394797	NA
CAD	noDM	3	ULK4	protein_coding	intronic,non-coding intronic	41865999	rs111574393	G	C	G	345225	0.980013	0.0204034	0.322409	NA
CAD	DM	3	ULK4	protein_coding	intronic,non-coding intronic	41865999	rs111574393	G	C	G	36749	1.00278	0.039462	0.943893	NA
CAD	Overall	3	ULK4	protein_coding	intronic,non-coding intronic	41867446	rs3005543	A	G	A	381974	0.983053	0.0178115	0.337247	NA
CAD	noDM	3	ULK4	protein_coding	intronic,non-coding intronic	41867446	rs3005543	A	G	A	345225	0.976727	0.0200627	0.2405	NA
CAD	DM	3	ULK4	protein_coding	intronic,non-coding intronic	41867446	rs3005543	A	G	A	36749	1.0078	0.0386346	0.840596	NA
CAD	Overall	3	ULK4	protein_coding	intronic,non-coding intronic	41869234	rs147161670	T	C	T	381974	0.983955	0.0180111	0.36915	NA
CAD	noDM	3	ULK4	protein_coding	intronic,non-coding intronic	41869234	rs147161670	T	C	T	345225	0.976902	0.020291	0.249444	NA
CAD	DM	3	ULK4	protein_coding	intronic,non-coding intronic	41869234	rs147161670	T	C	T	36749	1.01164	0.0390443	0.766961	NA
CAD	Overall	3	DHX30	protein_coding	non-coding intronic,intronic	47855594	rs62263573	C	T	C	381974	1.01971	0.0137875	0.156777	NA
CAD	noDM	3	DHX30	protein_coding	non-coding intronic,intronic	47855594	rs62263573	C	T	C	345225	1.01999	0.0155068	0.20181	NA
CAD	DM	3	DHX30	protein_coding	non-coding intronic,intronic	47855594	rs62263573	C	T	C	36749	1.0188	0.0300745	0.535631	NA
CAD	Overall	3	DHX30	protein_coding	intronic	47881942	rs145943094	T	C	T	381974	0.946733	0.0512304	0.285309	NA
CAD	noDM	3	DHX30	protein_coding	intronic	47881942	rs145943094	T	C	T	345225	0.93008	0.058251	0.213369	NA
CAD	DM	3	DHX30	protein_coding	intronic	47881942	rs145943094	T	C	T	36749	1.01137	0.107743	0.916437	NA
CAD	Overall	3	NME6	protein_coding	non-coding intronic,intronic	48342669	rs34523942	T	C	T	381974	0.969306	0.0140371	0.0263582	NA
CAD	noDM	3	NME6	protein_coding	non-coding intronic,intronic	48342669	rs34523942	T	C	T	345225	0.981876	0.0157403	0.245223	NA
CAD	DM	3	NME6	protein_coding	non-coding intronic,intronic	48342669	rs34523942	T	C	T	36749	0.922013	0.0309312	0.0086639	NA
CAD	Overall	3	NME6	protein_coding	5upstream,5utr	48343087	rs36075665	T	C	T	381974	0.970408	0.014044	0.0324469	NA
CAD	noDM	3	NME6	protein_coding	5upstream,5utr	48343087	rs36075665	T	C	T	345225	0.983301	0.0157473	0.284909	NA
CAD	DM	3	NME6	protein_coding	5upstream,5utr	48343087	rs36075665	T	C	T	36749	0.92193	0.030954	0.00863934	NA
CAD	Overall	3	CCDC51	protein_coding	intronic	48477252	rs146948889	A	G	A	381974	0.988133	0.0578834	0.836602	NA
CAD	noDM	3	CCDC51	protein_coding	intronic	48477252	rs146948889	A	G	A	345225	0.963557	0.0658678	0.573022	NA
CAD	DM	3	CCDC51	protein_coding	intronic	48477252	rs146948889	A	G	A	36749	1.08024	0.121507	0.525274	NA
CAD	Overall	3	SLC25A20	protein_coding	intronic	48926161	rs140502640	T	C	T	381974	1.06127	0.0291409	0.0412881	NA
CAD	noDM	3	SLC25A20	protein_coding	intronic	48926161	rs140502640	T	C	T	345225	1.05111	0.0328252	0.128867	NA
CAD	DM	3	SLC25A20	protein_coding	intronic	48926161	rs140502640	T	C	T	36749	1.09815	0.0632904	0.139053	NA
CAD	Overall	3	RHOA	protein_coding	intronic	49425004	rs34071734	A	G	A	381974	0.970606	0.0275863	0.279469	NA
CAD	noDM	3	RHOA	protein_coding	intronic	49425004	rs34071734	A	G	A	345225	0.971358	0.0310002	0.348536	NA
CAD	DM	3	RHOA	protein_coding	intronic	49425004	rs34071734	A	G	A	36749	0.96905	0.0603094	0.602161	NA
CAD	Overall	3	RNF123	protein_coding	intronic,non-coding intronic,5upstream	49757592	rs138638683	TACA	T	T	381974	1.03468	0.0130092	0.00877615	NA
CAD	Overall	3	AMIGO3	protein_coding	5utr,5upstream	49757592	rs138638683	TACA	T	T	381974	1.03468	0.0130092	0.00877615	NA
CAD	Overall	3	GMPPB	protein_coding	3downstream,3utr	49757592	rs138638683	TACA	T	T	381974	1.03468	0.0130092	0.00877615	NA
CAD	noDM	3	RNF123	protein_coding	intronic,non-coding intronic,5upstream	49757592	rs138638683	TACA	T	T	345225	1.03237	0.0146147	0.0292815	NA
CAD	noDM	3	AMIGO3	protein_coding	5utr,5upstream	49757592	rs138638683	TACA	T	T	345225	1.03237	0.0146147	0.0292815	NA
CAD	noDM	3	GMPPB	protein_coding	3downstream,3utr	49757592	rs138638683	TACA	T	T	345225	1.03237	0.0146147	0.0292815	NA
CAD	DM	3	RNF123	protein_coding	intronic,non-coding intronic,5upstream	49757592	rs138638683	TACA	T	T	36749	1.04284	0.0284781	0.140715	NA
CAD	DM	3	AMIGO3	protein_coding	5utr,5upstream	49757592	rs138638683	TACA	T	T	36749	1.04284	0.0284781	0.140715	NA
CAD	DM	3	GMPPB	protein_coding	3downstream,3utr	49757592	rs138638683	TACA	T	T	36749	1.04284	0.0284781	0.140715	NA
CAD	Overall	3	GMPPB	protein_coding	3utr,3downstream	49758764	rs4768	G	A	G	381974	1.02765	0.0137967	0.0480385	NA
CAD	Overall	3	AMIGO3	protein_coding	5upstream,5utr	49758764	rs4768	G	A	G	381974	1.02765	0.0137967	0.0480385	NA
CAD	Overall	3	RNF123	protein_coding	3utr,non-coding,3downstream	49758764	rs4768	G	A	G	381974	1.02765	0.0137967	0.0480385	NA
CAD	noDM	3	GMPPB	protein_coding	3utr,3downstream	49758764	rs4768	G	A	G	345225	1.02281	0.0155258	0.146355	NA
CAD	noDM	3	AMIGO3	protein_coding	5upstream,5utr	49758764	rs4768	G	A	G	345225	1.02281	0.0155258	0.146355	NA
CAD	noDM	3	RNF123	protein_coding	3utr,non-coding,3downstream	49758764	rs4768	G	A	G	345225	1.02281	0.0155258	0.146355	NA
CAD	DM	3	GMPPB	protein_coding	3utr,3downstream	49758764	rs4768	G	A	G	36749	1.04505	0.0300353	0.14234	NA
CAD	DM	3	AMIGO3	protein_coding	5upstream,5utr	49758764	rs4768	G	A	G	36749	1.04505	0.0300353	0.14234	NA
CAD	DM	3	RNF123	protein_coding	3utr,non-coding,3downstream	49758764	rs4768	G	A	G	36749	1.04505	0.0300353	0.14234	NA
CAD	Overall	3	HEMK1	protein_coding	non-coding intronic,intronic	50610696	rs417592	G	A	A	381974	0.973983	0.0188547	0.162079	NA
CAD	noDM	3	HEMK1	protein_coding	non-coding intronic,intronic	50610696	rs417592	G	A	A	345225	0.97632	0.0211443	0.25705	NA
CAD	DM	3	HEMK1	protein_coding	non-coding intronic,intronic	50610696	rs417592	G	A	A	36749	0.963299	0.041541	0.368061	NA
CAD	Overall	3	HEMK1	protein_coding	intronic,non-coding intronic,3downstream	50616538	rs139853420	T	C	T	381974	0.985987	0.0583154	0.808783	NA
CAD	noDM	3	HEMK1	protein_coding	intronic,non-coding intronic,3downstream	50616538	rs139853420	T	C	T	345225	1.00589	0.0649376	0.927976	NA
CAD	DM	3	HEMK1	protein_coding	intronic,non-coding intronic,3downstream	50616538	rs139853420	T	C	T	36749	0.908221	0.131716	0.464857	NA
CAD	Overall	3	WDR82	protein_coding	intronic,non-coding intronic	52299521	rs59612757	C	T	C	381974	0.981416	0.0169274	0.267781	NA
CAD	noDM	3	WDR82	protein_coding	intronic,non-coding intronic	52299521	rs59612757	C	T	C	345225	0.980421	0.0190188	0.298499	NA
CAD	DM	3	WDR82	protein_coding	intronic,non-coding intronic	52299521	rs59612757	C	T	C	36749	0.981198	0.03706	0.608527	NA
CAD	Overall	3	WDR82	protein_coding	intronic	52305719	rs71297387	G	A	G	381974	1.01016	0.0283839	0.721783	NA
CAD	noDM	3	WDR82	protein_coding	intronic	52305719	rs71297387	G	A	G	345225	1.02023	0.0318129	0.529008	NA
CAD	DM	3	WDR82	protein_coding	intronic	52305719	rs71297387	G	A	G	36749	0.970691	0.0625826	0.634555	NA
CAD	Overall	3	WDR82	protein_coding	intronic	52321809	rs141250728	C	A	C	381974	0.950583	0.0564192	0.369042	NA
CAD	Overall	3	GLYCTK	protein_coding	5upstream,intronic	52321809	rs141250728	C	A	C	381974	0.950583	0.0564192	0.369042	NA
CAD	noDM	3	WDR82	protein_coding	intronic	52321809	rs141250728	C	A	C	345225	0.981894	0.0628888	0.771403	NA
CAD	noDM	3	GLYCTK	protein_coding	5upstream,intronic	52321809	rs141250728	C	A	C	345225	0.981894	0.0628888	0.771403	NA
CAD	DM	3	WDR82	protein_coding	intronic	52321809	rs141250728	C	A	C	36749	0.838514	0.126622	0.164243	NA
CAD	DM	3	GLYCTK	protein_coding	5upstream,intronic	52321809	rs141250728	C	A	C	36749	0.838514	0.126622	0.164243	NA
CAD	Overall	3	NT5DC2	protein_coding	5upstream,non-coding intronic,3downstream,non-coding,intronic	52559705	rs11709284	A	G	G	381974	0.985992	0.0130609	0.280085	NA
CAD	noDM	3	NT5DC2	protein_coding	5upstream,non-coding intronic,3downstream,non-coding,intronic	52559705	rs11709284	A	G	G	345225	0.980103	0.0146935	0.171378	NA
CAD	DM	3	NT5DC2	protein_coding	5upstream,non-coding intronic,3downstream,non-coding,intronic	52559705	rs11709284	A	G	G	36749	1.00994	0.0284415	0.728024	NA
CAD	Overall	3	SMIM4	protein_coding	5upstream,non-coding,non-coding intronic	52568805	rs7639267	T	G	G	381974	0.984943	0.0130736	0.245854	NA
CAD	Overall	3	NT5DC2	protein_coding	5upstream,5utr	52568805	rs7639267	T	G	G	381974	0.984943	0.0130736	0.245854	NA
CAD	noDM	3	SMIM4	protein_coding	5upstream,non-coding,non-coding intronic	52568805	rs7639267	T	G	G	345225	0.979404	0.0147091	0.157114	NA
CAD	noDM	3	NT5DC2	protein_coding	5upstream,5utr	52568805	rs7639267	T	G	G	345225	0.979404	0.0147091	0.157114	NA
CAD	DM	3	SMIM4	protein_coding	5upstream,non-coding,non-coding intronic	52568805	rs7639267	T	G	G	36749	1.00762	0.0284612	0.789759	NA
CAD	DM	3	NT5DC2	protein_coding	5upstream,5utr	52568805	rs7639267	T	G	G	36749	1.00762	0.0284612	0.789759	NA
CAD	Overall	3	SMIM4	protein_coding	intronic	52611554	rs34735556	T	G	T	381974	0.984177	0.023116	0.490202	NA
CAD	Overall	3	PBRM1	protein_coding	intronic	52611554	rs34735556	T	G	T	381974	0.984177	0.023116	0.490202	NA
CAD	noDM	3	SMIM4	protein_coding	intronic	52611554	rs34735556	T	G	T	345225	0.983603	0.0259546	0.524124	NA
CAD	noDM	3	PBRM1	protein_coding	intronic	52611554	rs34735556	T	G	T	345225	0.983603	0.0259546	0.524124	NA
CAD	DM	3	SMIM4	protein_coding	intronic	52611554	rs34735556	T	G	T	36749	0.983246	0.0507186	0.739041	NA
CAD	DM	3	PBRM1	protein_coding	intronic	52611554	rs34735556	T	G	T	36749	0.983246	0.0507186	0.739041	NA
CAD	Overall	3	SMIM4	protein_coding	intronic	52612178	rs34115864	G	A	G	381974	1.01367	0.0133585	0.309438	NA
CAD	Overall	3	PBRM1	protein_coding	intronic	52612178	rs34115864	G	A	G	381974	1.01367	0.0133585	0.309438	NA
CAD	noDM	3	SMIM4	protein_coding	intronic	52612178	rs34115864	G	A	G	345225	1.01503	0.015021	0.320485	NA
CAD	noDM	3	PBRM1	protein_coding	intronic	52612178	rs34115864	G	A	G	345225	1.01503	0.015021	0.320485	NA
CAD	DM	3	SMIM4	protein_coding	intronic	52612178	rs34115864	G	A	G	36749	1.00821	0.0291384	0.779133	NA
CAD	DM	3	PBRM1	protein_coding	intronic	52612178	rs34115864	G	A	G	36749	1.00821	0.0291384	0.779133	NA
CAD	Overall	3	TKT	protein_coding	5upstream,intronic,non-coding intronic	53277859	rs79453591	A	C	A	381974	0.991004	0.0265517	0.733589	NA
CAD	noDM	3	TKT	protein_coding	5upstream,intronic,non-coding intronic	53277859	rs79453591	A	C	A	345225	0.999429	0.029762	0.984677	NA
CAD	DM	3	TKT	protein_coding	5upstream,intronic,non-coding intronic	53277859	rs79453591	A	C	A	36749	0.961745	0.0585359	0.505184	NA
CAD	Overall	3	CHDH	protein_coding	3utr	53850005	rs11130381	T	C	C	381974	0.999967	0.0130466	0.997973	NA
CAD	noDM	3	CHDH	protein_coding	3utr	53850005	rs11130381	T	C	C	345225	1.01069	0.0146745	0.468516	NA
CAD	DM	3	CHDH	protein_coding	3utr	53850005	rs11130381	T	C	C	36749	0.961525	0.0284422	0.167751	NA
CAD	Overall	3	CHDH	protein_coding	3utr	53850855	rs11714712	T	A	A	381974	0.997255	0.0131206	0.834031	NA
CAD	noDM	3	CHDH	protein_coding	3utr	53850855	rs11714712	T	A	A	345225	1.00866	0.01476	0.559216	NA
CAD	DM	3	CHDH	protein_coding	3utr	53850855	rs11714712	T	A	A	36749	0.956241	0.0285939	0.117613	NA
CAD	Overall	3	ABHD6	protein_coding	intronic	58228628	rs4681671	T	G	T	381974	1.02653	0.0130673	0.0450604	NA
CAD	noDM	3	ABHD6	protein_coding	intronic	58228628	rs4681671	T	G	T	345225	1.02294	0.0146852	0.12248	NA
CAD	DM	3	ABHD6	protein_coding	intronic	58228628	rs4681671	T	G	T	36749	1.03883	0.0285762	0.182444	NA
CAD	Overall	3	PDHB	protein_coding	3downstream,non-coding intronic,intronic	58415031	rs11719957	G	A	G	381974	0.991145	0.0236203	0.706497	NA
CAD	noDM	3	PDHB	protein_coding	3downstream,non-coding intronic,intronic	58415031	rs11719957	G	A	G	345225	0.985829	0.0265892	0.591426	NA
CAD	DM	3	PDHB	protein_coding	3downstream,non-coding intronic,intronic	58415031	rs11719957	G	A	G	36749	1.01218	0.0513804	0.813723	NA
CAD	Overall	3	PDHB	protein_coding	3utr,non-coding,3downstream,intronic,non-coding intronic	58415567	rs4585221	T	C	T	381974	0.991135	0.0236201	0.706195	NA
CAD	noDM	3	PDHB	protein_coding	3utr,non-coding,3downstream,intronic,non-coding intronic	58415567	rs4585221	T	C	T	345225	0.985807	0.0265893	0.590843	NA
CAD	DM	3	PDHB	protein_coding	3utr,non-coding,3downstream,intronic,non-coding intronic	58415567	rs4585221	T	C	T	36749	1.01223	0.0513791	0.812932	NA
CAD	Overall	3	ATXN7	protein_coding	intronic,non-coding intronic	63884292	rs832197	T	C	C	381974	0.978164	0.0140642	0.116467	NA
CAD	noDM	3	ATXN7	protein_coding	intronic,non-coding intronic	63884292	rs832197	T	C	C	345225	0.986752	0.015759	0.397399	NA
CAD	DM	3	ATXN7	protein_coding	intronic,non-coding intronic	63884292	rs832197	T	C	C	36749	0.945137	0.0310733	0.0693875	NA
CAD	Overall	3	SLC25A26	protein_coding	non-coding intronic,intronic	66362386	rs56250028	G	A	G	381974	1.00593	0.0148159	0.690032	NA
CAD	noDM	3	SLC25A26	protein_coding	non-coding intronic,intronic	66362386	rs56250028	G	A	G	345225	1.00789	0.0166246	0.636544	NA
CAD	DM	3	SLC25A26	protein_coding	non-coding intronic,intronic	66362386	rs56250028	G	A	G	36749	0.99722	0.0325728	0.931881	NA
CAD	Overall	3	GSK3B	protein_coding	non-coding intronic,intronic	119546455	rs56254723	AT	A	A	381974	0.971668	0.0225889	0.203249	NA
CAD	noDM	3	GSK3B	protein_coding	non-coding intronic,intronic	119546455	rs56254723	AT	A	A	345225	0.974666	0.0253403	0.311238	NA
CAD	DM	3	GSK3B	protein_coding	non-coding intronic,intronic	119546455	rs56254723	AT	A	A	36749	0.960227	0.0497088	0.41424	NA
CAD	Overall	3	GSK3B	protein_coding	intronic	119711992	rs540364070	GA	G	GA	381974	0.985518	0.016299	0.370763	NA
CAD	noDM	3	GSK3B	protein_coding	intronic	119711992	rs540364070	GA	G	GA	345225	0.986785	0.0183496	0.468452	NA
CAD	DM	3	GSK3B	protein_coding	intronic	119711992	rs540364070	GA	G	GA	36749	0.981079	0.0354017	0.589484	NA
CAD	Overall	3	GSK3B	protein_coding	intronic	119797761	rs112003116	TACAC	T	TACAC	381974	0.971778	0.0162694	0.0784752	NA
CAD	noDM	3	GSK3B	protein_coding	intronic	119797761	rs112003116	TACAC	T	TACAC	345225	0.97787	0.0182316	0.219658	NA
CAD	DM	3	GSK3B	protein_coding	intronic	119797761	rs112003116	TACAC	T	TACAC	36749	0.948703	0.0359138	0.142575	NA
CAD	Overall	3	CCDC58	protein_coding	non-coding intronic,intronic	122100023	rs9863881	T	C	T	381974	1.00693	0.013073	0.597514	NA
CAD	noDM	3	CCDC58	protein_coding	non-coding intronic,intronic	122100023	rs9863881	T	C	T	345225	1.00674	0.0146788	0.647116	NA
CAD	DM	3	CCDC58	protein_coding	non-coding intronic,intronic	122100023	rs9863881	T	C	T	36749	1.00665	0.0286759	0.817188	NA
CAD	Overall	3	PARP9	protein_coding	intronic	122282569	rs9841897	C	T	C	381974	1.00829	0.0177553	0.641789	NA
CAD	noDM	3	PARP9	protein_coding	intronic	122282569	rs9841897	C	T	C	345225	1.01383	0.0199274	0.490756	NA
CAD	DM	3	PARP9	protein_coding	intronic	122282569	rs9841897	C	T	C	36749	0.987041	0.0389504	0.737716	NA
CAD	Overall	3	ITGB5	protein_coding	coding pepshift,non-coding,3downstream	124482494	rs745372859	T	TTTGTTGAAC	T	381974	1.09856	0.0188709	6.32095e-07	rs17282078(1),rs614664(1),3:124489739_CG_C(1),rs621209(1),rs62265637(1),rs2035264(1),rs702036(1),rs702035(1),rs2619328(1),rs3772831(1),rs62265639(1),rs17282085(1),rs2619330(1),rs2650067(1),rs201689739(1),rs62265641(1),rs4678165(1),rs4678166(1),rs3755710(1),rs4678167(1),3:124540916_TAA_T(1),rs66464554(1),rs6438855(1),rs3851349(1),rs7635307(1),rs3772841(1)
CAD	noDM	3	ITGB5	protein_coding	coding pepshift,non-coding,3downstream	124482494	rs745372859	T	TTTGTTGAAC	T	345225	1.10654	0.0211167	1.63241e-06	NA
CAD	DM	3	ITGB5	protein_coding	coding pepshift,non-coding,3downstream	124482494	rs745372859	T	TTTGTTGAAC	T	36749	1.07082	0.0418883	0.102342	NA
CAD	Overall	3	ITGB5	protein_coding	intronic	124594955	rs1948696	C	T	T	381974	0.989498	0.0134073	0.431025	NA
CAD	noDM	3	ITGB5	protein_coding	intronic	124594955	rs1948696	C	T	T	345225	0.990629	0.0150632	0.531937	NA
CAD	DM	3	ITGB5	protein_coding	intronic	124594955	rs1948696	C	T	T	36749	0.984527	0.0293237	0.594879	NA
CAD	Overall	3	ITGB5	protein_coding	5upstream,intronic	124606753	rs4679113	A	T	T	381974	0.993629	0.0135091	0.636104	NA
CAD	noDM	3	ITGB5	protein_coding	5upstream,intronic	124606753	rs4679113	A	T	T	345225	0.994116	0.0151854	0.697547	NA
CAD	DM	3	ITGB5	protein_coding	5upstream,intronic	124606753	rs4679113	A	T	T	36749	0.991189	0.0294957	0.764151	NA
CAD	Overall	3	ITGB5	protein_coding	intronic,non-coding intronic	124614317	rs9869147	T	C	T	381974	0.994427	0.0133196	0.674769	NA
CAD	noDM	3	ITGB5	protein_coding	intronic,non-coding intronic	124614317	rs9869147	T	C	T	345225	0.989298	0.0149511	0.471727	NA
CAD	DM	3	ITGB5	protein_coding	intronic,non-coding intronic	124614317	rs9869147	T	C	T	36749	1.01502	0.0292388	0.610245	NA
CAD	Overall	3	EEFSEC	protein_coding	intronic,non-coding intronic	128039895	rs11708733	A	G	A	381974	0.9049	0.0318188	0.00168592	NA
CAD	noDM	3	EEFSEC	protein_coding	intronic,non-coding intronic	128039895	rs11708733	A	G	A	345225	0.890172	0.0359152	0.00119814	NA
CAD	DM	3	EEFSEC	protein_coding	intronic,non-coding intronic	128039895	rs11708733	A	G	A	36749	0.965603	0.0686547	0.610165	NA
CAD	Overall	3	NPHP3	protein_coding	intronic	132288497	rs76651220	A	C	A	381974	1.00726	0.0305234	0.812563	NA
CAD	Overall	3	ACAD11	protein_coding	non-coding intronic,intronic	132288497	rs76651220	A	C	A	381974	1.00726	0.0305234	0.812563	NA
CAD	noDM	3	NPHP3	protein_coding	intronic	132288497	rs76651220	A	C	A	345225	0.973844	0.0346549	0.444396	NA
CAD	noDM	3	ACAD11	protein_coding	non-coding intronic,intronic	132288497	rs76651220	A	C	A	345225	0.973844	0.0346549	0.444396	NA
CAD	DM	3	NPHP3	protein_coding	intronic	132288497	rs76651220	A	C	A	36749	1.13602	0.0647264	0.0488002	NA
CAD	DM	3	ACAD11	protein_coding	non-coding intronic,intronic	132288497	rs76651220	A	C	A	36749	1.13602	0.0647264	0.0488002	NA
CAD	Overall	3	NPHP3	protein_coding	intronic	132345723	rs78240150	C	T	C	381974	0.94851	0.0236412	0.0253482	NA
CAD	Overall	3	ACAD11	protein_coding	intronic,non-coding,non-coding intronic	132345723	rs78240150	C	T	C	381974	0.94851	0.0236412	0.0253482	NA
CAD	noDM	3	NPHP3	protein_coding	intronic	132345723	rs78240150	C	T	C	345225	0.944774	0.0265383	0.0323032	NA
CAD	noDM	3	ACAD11	protein_coding	intronic,non-coding,non-coding intronic	132345723	rs78240150	C	T	C	345225	0.944774	0.0265383	0.0323032	NA
CAD	DM	3	NPHP3	protein_coding	intronic	132345723	rs78240150	C	T	C	36749	0.964719	0.0519834	0.48959	NA
CAD	DM	3	ACAD11	protein_coding	intronic,non-coding,non-coding intronic	132345723	rs78240150	C	T	C	36749	0.964719	0.0519834	0.48959	NA
CAD	Overall	3	PCCB	protein_coding	non-coding intronic,5upstream,non-coding,intronic,5utr	135974216	rs9844666	A	G	A	381974	1.02623	0.0150975	0.0864042	NA
CAD	noDM	3	PCCB	protein_coding	non-coding intronic,5upstream,non-coding,intronic,5utr	135974216	rs9844666	A	G	A	345225	1.02874	0.0169857	0.0952385	NA
CAD	DM	3	PCCB	protein_coding	non-coding intronic,5upstream,non-coding,intronic,5utr	135974216	rs9844666	A	G	A	36749	1.01612	0.03286	0.626579	NA
CAD	Overall	3	PCCB	protein_coding	5upstream,non-coding intronic,intronic	135976917	rs113793438	ATTTC	A	ATTTC	381974	1.02768	0.0136387	0.0452583	NA
CAD	noDM	3	PCCB	protein_coding	5upstream,non-coding intronic,intronic	135976917	rs113793438	ATTTC	A	ATTTC	345225	1.03006	0.015337	0.0534613	NA
CAD	DM	3	PCCB	protein_coding	5upstream,non-coding intronic,intronic	135976917	rs113793438	ATTTC	A	ATTTC	36749	1.01757	0.0297463	0.558129	NA
CAD	Overall	3	PCCB	protein_coding	3downstream,non-coding intronic,intronic	135982096	rs372863955	GTT	G	G	381974	0.930036	0.016759	1.505e-05	NA
CAD	noDM	3	PCCB	protein_coding	3downstream,non-coding intronic,intronic	135982096	rs372863955	GTT	G	G	345225	0.920515	0.0188835	1.15471e-05	NA
CAD	DM	3	PCCB	protein_coding	3downstream,non-coding intronic,intronic	135982096	rs372863955	GTT	G	G	36749	0.966687	0.0363335	0.351084	NA
CAD	Overall	3	PCCB	protein_coding	non-coding intronic,intronic	135983497	rs866782	T	C	T	381974	0.927586	0.016466	4.99132e-06	NA
CAD	noDM	3	PCCB	protein_coding	non-coding intronic,intronic	135983497	rs866782	T	C	T	345225	0.919106	0.0185508	5.43729e-06	NA
CAD	DM	3	PCCB	protein_coding	non-coding intronic,intronic	135983497	rs866782	T	C	T	36749	0.960202	0.0357178	0.255529	NA
CAD	Overall	3	PCCB	protein_coding	non-coding intronic,intronic	135986438	rs9872178	G	T	G	381974	1.03136	0.015049	0.0402073	NA
CAD	noDM	3	PCCB	protein_coding	non-coding intronic,intronic	135986438	rs9872178	G	T	G	345225	1.033	0.0169321	0.0552059	NA
CAD	DM	3	PCCB	protein_coding	non-coding intronic,intronic	135986438	rs9872178	G	T	G	36749	1.02445	0.0327504	0.460683	NA
CAD	Overall	3	PCCB	protein_coding	non-coding intronic,intronic	135998670	rs6785225	C	T	C	381974	1.02851	0.0136435	0.0393321	NA
CAD	noDM	3	PCCB	protein_coding	non-coding intronic,intronic	135998670	rs6785225	C	T	C	345225	1.03045	0.0153419	0.0505394	NA
CAD	DM	3	PCCB	protein_coding	non-coding intronic,intronic	135998670	rs6785225	C	T	C	36749	1.02005	0.0297611	0.504837	NA
CAD	Overall	3	PCCB	protein_coding	3downstream,intronic,non-coding intronic	136003157	rs532597494	CTGATGT	C	C	381974	0.931517	0.0152654	3.36525e-06	NA
CAD	noDM	3	PCCB	protein_coding	3downstream,intronic,non-coding intronic	136003157	rs532597494	CTGATGT	C	C	345225	0.930883	0.0171625	3.00397e-05	NA
CAD	DM	3	PCCB	protein_coding	3downstream,intronic,non-coding intronic	136003157	rs532597494	CTGATGT	C	C	36749	0.933817	0.0333332	0.0399512	NA
CAD	Overall	3	PCCB	protein_coding	non-coding intronic,intronic	136027145	rs1618069	G	A	A	381974	0.932884	0.0152534	5.24646e-06	NA
CAD	noDM	3	PCCB	protein_coding	non-coding intronic,intronic	136027145	rs1618069	G	A	A	345225	0.932282	0.0171519	4.34725e-05	NA
CAD	DM	3	PCCB	protein_coding	non-coding intronic,intronic	136027145	rs1618069	G	A	A	36749	0.934994	0.0332871	0.0434616	NA
CAD	Overall	3	PARL	protein_coding	non-coding intronic,intronic	183593456	rs7635679	C	T	T	381974	1.0123	0.0130364	0.348245	NA
CAD	noDM	3	PARL	protein_coding	non-coding intronic,intronic	183593456	rs7635679	C	T	T	345225	1.00647	0.0146667	0.659944	NA
CAD	DM	3	PARL	protein_coding	non-coding intronic,intronic	183593456	rs7635679	C	T	T	36749	1.03214	0.0283817	0.265009	NA
CAD	Overall	3	TP63	protein_coding	intronic,non-coding intronic	189389626	rs1920280	C	T	C	381974	0.997923	0.0132199	0.87502	NA
CAD	noDM	3	TP63	protein_coding	intronic,non-coding intronic	189389626	rs1920280	C	T	C	345225	1.00187	0.0148325	0.899701	NA
CAD	DM	3	TP63	protein_coding	intronic,non-coding intronic	189389626	rs1920280	C	T	C	36749	0.982691	0.0290792	0.548216	NA
CAD	Overall	4	NOP14	protein_coding	intronic	2956963	rs71597204	G	A	G	381974	0.969849	0.013278	0.0211301	NA
CAD	Overall	4	NOP14-AS1	antisense	non-coding intronic	2956963	rs71597204	G	A	G	381974	0.969849	0.013278	0.0211301	NA
CAD	noDM	4	NOP14	protein_coding	intronic	2956963	rs71597204	G	A	G	345225	0.969534	0.0149186	0.0380894	NA
CAD	noDM	4	NOP14-AS1	antisense	non-coding intronic	2956963	rs71597204	G	A	G	345225	0.969534	0.0149186	0.0380894	NA
CAD	DM	4	NOP14	protein_coding	intronic	2956963	rs71597204	G	A	G	36749	0.971442	0.0290502	0.318586	NA
CAD	DM	4	NOP14-AS1	antisense	non-coding intronic	2956963	rs71597204	G	A	G	36749	0.971442	0.0290502	0.318586	NA
CAD	Overall	4	NOP14	protein_coding	intronic	2962452	rs35681707	T	C	T	381974	0.967141	0.0140021	0.0170267	NA
CAD	Overall	4	NOP14-AS1	antisense	non-coding intronic	2962452	rs35681707	T	C	T	381974	0.967141	0.0140021	0.0170267	NA
CAD	noDM	4	NOP14	protein_coding	intronic	2962452	rs35681707	T	C	T	345225	0.965109	0.0157249	0.0239176	NA
CAD	noDM	4	NOP14-AS1	antisense	non-coding intronic	2962452	rs35681707	T	C	T	345225	0.965109	0.0157249	0.0239176	NA
CAD	DM	4	NOP14	protein_coding	intronic	2962452	rs35681707	T	C	T	36749	0.973728	0.0306951	0.385749	NA
CAD	DM	4	NOP14-AS1	antisense	non-coding intronic	2962452	rs35681707	T	C	T	36749	0.973728	0.0306951	0.385749	NA
CAD	Overall	4	HTT	protein_coding	non-coding intronic,intronic	3138200	rs369081036	GAAA	G	GAAA	381974	1.02708	0.0292621	0.361203	NA
CAD	noDM	4	HTT	protein_coding	non-coding intronic,intronic	3138200	rs369081036	GAAA	G	GAAA	345225	1.03173	0.0327676	0.340472	NA
CAD	DM	4	HTT	protein_coding	non-coding intronic,intronic	3138200	rs369081036	GAAA	G	GAAA	36749	1.00932	0.0648129	0.886206	NA
CAD	Overall	4	HTT	protein_coding	intronic,non-coding intronic	3140409	rs113928896	T	C	T	381974	0.993896	0.019032	0.747692	NA
CAD	noDM	4	HTT	protein_coding	intronic,non-coding intronic	3140409	rs113928896	T	C	T	345225	0.985887	0.0214209	0.506989	NA
CAD	DM	4	HTT	protein_coding	intronic,non-coding intronic	3140409	rs113928896	T	C	T	36749	1.02246	0.0414446	0.592084	NA
CAD	Overall	4	HTT	protein_coding	intronic,non-coding intronic	3141410	rs363064	T	C	T	381974	0.98632	0.0141909	0.331709	NA
CAD	noDM	4	HTT	protein_coding	intronic,non-coding intronic	3141410	rs363064	T	C	T	345225	0.976926	0.0159564	0.143468	NA
CAD	DM	4	HTT	protein_coding	intronic,non-coding intronic	3141410	rs363064	T	C	T	36749	1.01965	0.0310121	0.530279	NA
CAD	Overall	4	DOK7	protein_coding	intronic,non-coding intronic	3469341	rs10937926	A	G	A	381974	1.01261	0.0129541	0.333294	NA
CAD	noDM	4	DOK7	protein_coding	intronic,non-coding intronic	3469341	rs10937926	A	G	A	345225	1.01517	0.0145667	0.301291	NA
CAD	DM	4	DOK7	protein_coding	intronic,non-coding intronic	3469341	rs10937926	A	G	A	36749	1.00262	0.028248	0.92616	NA
CAD	Overall	4	DOK7	protein_coding	non-coding intronic,intronic	3469348	rs56298023	T	C	T	381974	0.964418	0.0257598	0.159578	NA
CAD	noDM	4	DOK7	protein_coding	non-coding intronic,intronic	3469348	rs56298023	T	C	T	345225	0.96922	0.0288594	0.278667	NA
CAD	DM	4	DOK7	protein_coding	non-coding intronic,intronic	3469348	rs56298023	T	C	T	36749	0.945964	0.0569193	0.329083	NA
CAD	Overall	4	DOK7	protein_coding	intronic,non-coding intronic	3469443	rs10937927	G	A	G	381974	1.00935	0.0129299	0.471483	NA
CAD	noDM	4	DOK7	protein_coding	intronic,non-coding intronic	3469443	rs10937927	G	A	G	345225	1.01159	0.0145383	0.427908	NA
CAD	DM	4	DOK7	protein_coding	intronic,non-coding intronic	3469443	rs10937927	G	A	G	36749	1.00034	0.0282021	0.990328	NA
CAD	Overall	4	DOK7	protein_coding	non-coding intronic,intronic	3469976	rs62275881	C	A	C	381974	1.03519	0.0146752	0.0184254	NA
CAD	noDM	4	DOK7	protein_coding	non-coding intronic,intronic	3469976	rs62275881	C	A	C	345225	1.04115	0.0164628	0.0143044	NA
CAD	DM	4	DOK7	protein_coding	non-coding intronic,intronic	3469976	rs62275881	C	A	C	36749	1.01238	0.0322776	0.703008	NA
CAD	Overall	4	DOK7	protein_coding	intronic,non-coding intronic	3470174	rs139750425	TCTGC	T	TCTGC	381974	1.03324	0.0147591	0.0267147	NA
CAD	noDM	4	DOK7	protein_coding	intronic,non-coding intronic	3470174	rs139750425	TCTGC	T	TCTGC	345225	1.03986	0.0165573	0.0182457	NA
CAD	DM	4	DOK7	protein_coding	intronic,non-coding intronic	3470174	rs139750425	TCTGC	T	TCTGC	36749	1.00802	0.0324578	0.805703	NA
CAD	Overall	4	DOK7	protein_coding	non-coding intronic,intronic	3470604	rs36205397	G	A	G	381974	1.04415	0.0131368	0.00100543	NA
CAD	noDM	4	DOK7	protein_coding	non-coding intronic,intronic	3470604	rs36205397	G	A	G	345225	1.0524	0.0147556	0.000537092	NA
CAD	DM	4	DOK7	protein_coding	non-coding intronic,intronic	3470604	rs36205397	G	A	G	36749	1.01427	0.0287676	0.622419	NA
CAD	Overall	4	DOK7	protein_coding	intronic,non-coding intronic	3477082	rs79295655	A	G	A	381974	1.11104	0.0429115	0.0141355	NA
CAD	noDM	4	DOK7	protein_coding	intronic,non-coding intronic	3477082	rs79295655	A	G	A	345225	1.13838	0.0474102	0.00626209	NA
CAD	DM	4	DOK7	protein_coding	intronic,non-coding intronic	3477082	rs79295655	A	G	A	36749	1.00134	0.100152	0.989315	NA
CAD	Overall	4	DOK7	protein_coding	non-coding intronic,intronic	3488992	rs1881801	G	A	A	381974	0.983819	0.0137928	0.23692	NA
CAD	noDM	4	DOK7	protein_coding	non-coding intronic,intronic	3488992	rs1881801	G	A	A	345225	0.979934	0.0155217	0.191579	NA
CAD	DM	4	DOK7	protein_coding	non-coding intronic,intronic	3488992	rs1881801	G	A	A	36749	0.996975	0.030019	0.919601	NA
CAD	Overall	4	DOK7	protein_coding	non-coding intronic,intronic	3489875	rs1881800	T	C	T	381974	1.01002	0.0129903	0.442639	NA
CAD	noDM	4	DOK7	protein_coding	non-coding intronic,intronic	3489875	rs1881800	T	C	T	345225	1.00834	0.0146199	0.570048	NA
CAD	DM	4	DOK7	protein_coding	non-coding intronic,intronic	3489875	rs1881800	T	C	T	36749	1.01872	0.028262	0.511588	NA
CAD	Overall	4	DOK7	protein_coding	intronic,non-coding intronic	3490072	rs2857984	T	A	A	381974	0.984304	0.0137794	0.250928	NA
CAD	noDM	4	DOK7	protein_coding	intronic,non-coding intronic	3490072	rs2857984	T	A	A	345225	0.981918	0.0155066	0.239299	NA
CAD	DM	4	DOK7	protein_coding	intronic,non-coding intronic	3490072	rs2857984	T	A	A	36749	0.991828	0.0299854	0.784347	NA
CAD	Overall	4	DOK7	protein_coding	5upstream,non-coding intronic,intronic	3493542	rs2699417	A	T	A	381974	0.983056	0.0130286	0.189638	NA
CAD	noDM	4	DOK7	protein_coding	5upstream,non-coding intronic,intronic	3493542	rs2699417	A	T	A	345225	0.983899	0.0146549	0.268032	NA
CAD	DM	4	DOK7	protein_coding	5upstream,non-coding intronic,intronic	3493542	rs2699417	A	T	A	36749	0.980705	0.0283953	0.49261	NA
CAD	Overall	4	OCIAD1	protein_coding	intronic	48808989	rs13141838	T	C	C	381974	0.988383	0.0130343	0.369992	NA
CAD	noDM	4	OCIAD1	protein_coding	intronic	48808989	rs13141838	T	C	C	345225	0.983918	0.0146336	0.267905	NA
CAD	DM	4	OCIAD1	protein_coding	intronic	48808989	rs13141838	T	C	C	36749	1.0034	0.0285874	0.905577	NA
CAD	Overall	4	ALB	protein_coding	intronic,5upstream,3downstream,non-coding intronic	74282652	rs55637321	T	C	T	381974	0.933894	0.0416002	0.100169	NA
CAD	noDM	4	ALB	protein_coding	intronic,5upstream,3downstream,non-coding intronic	74282652	rs55637321	T	C	T	345225	0.90815	0.0474122	0.042144	NA
CAD	DM	4	ALB	protein_coding	intronic,5upstream,3downstream,non-coding intronic	74282652	rs55637321	T	C	T	36749	1.02872	0.087079	0.745076	NA
CAD	Overall	4	THAP9	protein_coding	intronic,3downstream	83830244	rs60909079	C	G	C	381974	0.995608	0.0148619	0.767114	NA
CAD	noDM	4	THAP9	protein_coding	intronic,3downstream	83830244	rs60909079	C	G	C	345225	1.0096	0.0166658	0.566342	NA
CAD	DM	4	THAP9	protein_coding	intronic,3downstream	83830244	rs60909079	C	G	C	36749	0.94359	0.0327221	0.0759918	NA
CAD	Overall	4	MAPK10	protein_coding	non-coding intronic,intronic	87240063	rs141031540	TA	T	TA	381974	1.00711	0.0134989	0.599896	NA
CAD	noDM	4	MAPK10	protein_coding	non-coding intronic,intronic	87240063	rs141031540	TA	T	TA	345225	1.00882	0.0151731	0.562967	NA
CAD	DM	4	MAPK10	protein_coding	non-coding intronic,intronic	87240063	rs141031540	TA	T	TA	36749	1.00193	0.0294851	0.947773	NA
CAD	Overall	4	MAPK10	protein_coding	non-coding intronic,intronic	87242057	rs62307367	T	C	T	381974	1.00651	0.0134336	0.629269	NA
CAD	noDM	4	MAPK10	protein_coding	non-coding intronic,intronic	87242057	rs62307367	T	C	T	345225	1.00784	0.0150982	0.60512	NA
CAD	DM	4	MAPK10	protein_coding	non-coding intronic,intronic	87242057	rs62307367	T	C	T	36749	1.00278	0.0293533	0.924688	NA
CAD	Overall	4	MAPK10	protein_coding	intronic,non-coding intronic	87269712	rs62307409	G	A	G	381974	1.00662	0.0150988	0.662037	NA
CAD	noDM	4	MAPK10	protein_coding	intronic,non-coding intronic	87269712	rs62307409	G	A	G	345225	0.995859	0.0170278	0.807456	NA
CAD	DM	4	MAPK10	protein_coding	intronic,non-coding intronic	87269712	rs62307409	G	A	G	36749	1.0499	0.0326412	0.135778	NA
CAD	Overall	4	MAPK10	protein_coding	non-coding intronic,intronic	87294293	rs72663972	A	C	A	381974	1.00741	0.0134355	0.582433	NA
CAD	noDM	4	MAPK10	protein_coding	non-coding intronic,intronic	87294293	rs72663972	A	C	A	345225	1.00954	0.0150982	0.529426	NA
CAD	DM	4	MAPK10	protein_coding	non-coding intronic,intronic	87294293	rs72663972	A	C	A	36749	1.00067	0.0293733	0.981769	NA
CAD	Overall	4	MAPK10	protein_coding	non-coding intronic,intronic	87398449	rs13109115	C	T	C	381974	1.03518	0.0201649	0.0864402	NA
CAD	noDM	4	MAPK10	protein_coding	non-coding intronic,intronic	87398449	rs13109115	C	T	C	345225	1.0269	0.0227281	0.242811	NA
CAD	DM	4	MAPK10	protein_coding	non-coding intronic,intronic	87398449	rs13109115	C	T	C	36749	1.06656	0.0436572	0.139947	NA
CAD	Overall	4	MAPK10	protein_coding	non-coding intronic,intronic	87413424	rs2869441	G	A	A	381974	1.04747	0.0194671	0.0172084	NA
CAD	noDM	4	MAPK10	protein_coding	non-coding intronic,intronic	87413424	rs2869441	G	A	A	345225	1.03942	0.0219342	0.0779431	NA
CAD	DM	4	MAPK10	protein_coding	non-coding intronic,intronic	87413424	rs2869441	G	A	A	36749	1.07723	0.0421932	0.0778893	NA
CAD	Overall	4	MAPK10	protein_coding	non-coding intronic,intronic	87438563	rs7661663	G	A	A	381974	1.04646	0.0194656	0.0196458	NA
CAD	noDM	4	MAPK10	protein_coding	non-coding intronic,intronic	87438563	rs7661663	G	A	A	345225	1.03874	0.0219328	0.0830733	NA
CAD	DM	4	MAPK10	protein_coding	non-coding intronic,intronic	87438563	rs7661663	G	A	A	36749	1.07485	0.042184	0.0870485	NA
CAD	Overall	4	MAPK10	protein_coding	intronic,non-coding intronic	87502391	rs74678260	G	A	G	381974	1.00489	0.0160672	0.761487	NA
CAD	noDM	4	MAPK10	protein_coding	intronic,non-coding intronic	87502391	rs74678260	G	A	G	345225	0.993212	0.0181287	0.707149	NA
CAD	DM	4	MAPK10	protein_coding	intronic,non-coding intronic	87502391	rs74678260	G	A	G	36749	1.05018	0.0346546	0.157679	NA
CAD	Overall	4	NUDT9	protein_coding	intronic,non-coding intronic	88367239	rs114460567	T	C	T	381974	0.990943	0.0205131	0.65737	NA
CAD	noDM	4	NUDT9	protein_coding	intronic,non-coding intronic	88367239	rs114460567	T	C	T	345225	0.987046	0.0231238	0.572857	NA
CAD	DM	4	NUDT9	protein_coding	intronic,non-coding intronic	88367239	rs114460567	T	C	T	36749	1.00459	0.0443838	0.917738	NA
CAD	Overall	4	ADH5	protein_coding	5upstream,non-coding intronic,non-coding,3utr,intronic	100006645	rs1154410	G	A	A	381974	1.01178	0.0145595	0.420998	NA
CAD	noDM	4	ADH5	protein_coding	5upstream,non-coding intronic,non-coding,3utr,intronic	100006645	rs1154410	G	A	A	345225	1.02009	0.0163373	0.223339	NA
CAD	DM	4	ADH5	protein_coding	5upstream,non-coding intronic,non-coding,3utr,intronic	100006645	rs1154410	G	A	A	36749	0.982956	0.0319771	0.59085	NA
CAD	Overall	4	ADH5	protein_coding	intronic,non-coding intronic	100009596	rs1154402	G	C	G	381974	0.991664	0.0131088	0.523115	NA
CAD	noDM	4	ADH5	protein_coding	intronic,non-coding intronic	100009596	rs1154402	G	C	G	345225	0.981996	0.0147504	0.218051	NA
CAD	DM	4	ADH5	protein_coding	intronic,non-coding intronic	100009596	rs1154402	G	C	G	36749	1.02718	0.0285429	0.347495	NA
CAD	Overall	4	PPP3CA	protein_coding	intronic	102084331	rs1527351	C	T	C	381974	1.00841	0.0136465	0.539212	NA
CAD	noDM	4	PPP3CA	protein_coding	intronic	102084331	rs1527351	C	T	C	345225	0.996608	0.0153631	0.824961	NA
CAD	DM	4	PPP3CA	protein_coding	intronic	102084331	rs1527351	C	T	C	36749	1.05292	0.0296768	0.0822499	NA
CAD	Overall	4	SLC39A8	protein_coding	intronic,coding nonsyn	103184239	rs112519623	A	G	A	381974	0.989579	0.0514742	0.838728	NA
CAD	noDM	4	SLC39A8	protein_coding	intronic,coding nonsyn	103184239	rs112519623	A	G	A	345225	0.961889	0.0586211	0.507432	NA
CAD	DM	4	SLC39A8	protein_coding	intronic,coding nonsyn	103184239	rs112519623	A	G	A	36749	1.09164	0.107948	0.416638	NA
CAD	Overall	4	SLC39A8	protein_coding	coding nonsyn|nonsyn	103188709	rs13107325	T	C	T	381974	0.959738	0.0249515	0.0995607	NA
CAD	noDM	4	SLC39A8	protein_coding	coding nonsyn|nonsyn	103188709	rs13107325	T	C	T	345225	0.955124	0.0282551	0.104167	NA
CAD	DM	4	SLC39A8	protein_coding	coding nonsyn|nonsyn	103188709	rs13107325	T	C	T	36749	0.97548	0.0531276	0.640298	NA
CAD	Overall	4	SLC39A8	protein_coding	intronic,non-coding intronic	103191376	rs5860722	CA	C	CA	381974	0.985416	0.013063	0.26074	NA
CAD	noDM	4	SLC39A8	protein_coding	intronic,non-coding intronic	103191376	rs5860722	CA	C	CA	345225	0.988039	0.0146922	0.412783	NA
CAD	DM	4	SLC39A8	protein_coding	intronic,non-coding intronic	103191376	rs5860722	CA	C	CA	36749	0.975906	0.0284774	0.391757	NA
CAD	Overall	4	SLC39A8	protein_coding	non-coding intronic,intronic	103232168	rs13103835	C	T	C	381974	1.02211	0.0136813	0.109965	NA
CAD	noDM	4	SLC39A8	protein_coding	non-coding intronic,intronic	103232168	rs13103835	C	T	C	345225	1.01315	0.0154061	0.396558	NA
CAD	DM	4	SLC39A8	protein_coding	non-coding intronic,intronic	103232168	rs13103835	C	T	C	36749	1.05433	0.0297209	0.0750706	NA
CAD	Overall	4	SLC39A8	protein_coding	non-coding intronic	103293738	rs537107181	C	T	C	381974	0.919833	0.0733573	0.254648	NA
CAD	noDM	4	SLC39A8	protein_coding	non-coding intronic	103293738	rs537107181	C	T	C	345225	0.852571	0.0847091	0.0597133	NA
CAD	DM	4	SLC39A8	protein_coding	non-coding intronic	103293738	rs537107181	C	T	C	36749	1.18688	0.148469	0.248516	NA
CAD	Overall	4	SLC39A8	protein_coding	non-coding intronic	103336344	rs143546063	A	G	A	381974	0.996868	0.0172737	0.855911	NA
CAD	noDM	4	SLC39A8	protein_coding	non-coding intronic	103336344	rs143546063	A	G	A	345225	1.01281	0.0193294	0.510108	NA
CAD	DM	4	SLC39A8	protein_coding	non-coding intronic	103336344	rs143546063	A	G	A	36749	0.939163	0.0382904	0.101166	NA
CAD	Overall	4	CISD2	protein_coding	intronic	103800194	rs223322	A	G	A	381974	1.03354	0.0137424	0.016369	NA
CAD	noDM	4	CISD2	protein_coding	intronic	103800194	rs223322	A	G	A	345225	1.02552	0.0154329	0.102455	NA
CAD	DM	4	CISD2	protein_coding	intronic	103800194	rs223322	A	G	A	36749	1.06242	0.030148	0.0446154	NA
CAD	Overall	4	CISD2	protein_coding	intronic	103802824	rs223317	C	T	C	381974	1.03355	0.0137431	0.0163358	NA
CAD	noDM	4	CISD2	protein_coding	intronic	103802824	rs223317	C	T	C	345225	1.02575	0.0154326	0.0995189	NA
CAD	DM	4	CISD2	protein_coding	intronic	103802824	rs223317	C	T	C	36749	1.06156	0.0301557	0.0475743	NA
CAD	Overall	4	SLC9B2	protein_coding	3downstream,3utr	103941075	rs34955446	C	T	C	381974	0.983082	0.0341242	0.617063	NA
CAD	noDM	4	SLC9B2	protein_coding	3downstream,3utr	103941075	rs34955446	C	T	C	345225	1.00143	0.0381608	0.970068	NA
CAD	DM	4	SLC9B2	protein_coding	3downstream,3utr	103941075	rs34955446	C	T	C	36749	0.921616	0.0757015	0.280917	NA
CAD	Overall	4	SLC9B2	protein_coding	intronic	103942714	rs10516497	C	A	C	381974	1.03343	0.0162126	0.042562	NA
CAD	noDM	4	SLC9B2	protein_coding	intronic	103942714	rs10516497	C	A	C	345225	1.02212	0.0182354	0.230258	NA
CAD	DM	4	SLC9B2	protein_coding	intronic	103942714	rs10516497	C	A	C	36749	1.07753	0.0353842	0.0348244	NA
CAD	Overall	4	SLC9B2	protein_coding	intronic	103950425	rs1080081	T	C	T	381974	1.02494	0.0129888	0.0578643	NA
CAD	noDM	4	SLC9B2	protein_coding	intronic	103950425	rs1080081	T	C	T	345225	1.01086	0.014594	0.4594	NA
CAD	DM	4	SLC9B2	protein_coding	intronic	103950425	rs1080081	T	C	T	36749	1.0788	0.0284309	0.00763744	NA
CAD	Overall	4	SLC9B2	protein_coding	intronic	103953389	rs1383732	G	A	G	381974	0.991066	0.0182515	0.622919	NA
CAD	noDM	4	SLC9B2	protein_coding	intronic	103953389	rs1383732	G	A	G	345225	0.976988	0.0205912	0.258206	NA
CAD	DM	4	SLC9B2	protein_coding	intronic	103953389	rs1383732	G	A	G	36749	1.04748	0.0394169	0.239252	NA
CAD	Overall	4	SLC9B2	protein_coding	intronic	103954109	rs113733701	T	C	T	381974	1.00765	0.057201	0.893969	NA
CAD	noDM	4	SLC9B2	protein_coding	intronic	103954109	rs113733701	T	C	T	345225	1.00065	0.0649264	0.991974	NA
CAD	DM	4	SLC9B2	protein_coding	intronic	103954109	rs113733701	T	C	T	36749	1.03394	0.120759	0.782269	NA
CAD	Overall	4	CCDC109B	protein_coding	non-coding intronic,intronic	110537251	rs36121800	C	T	C	381974	1.23345	0.0463665	6.03397e-06	NA
CAD	noDM	4	CCDC109B	protein_coding	non-coding intronic,intronic	110537251	rs36121800	C	T	C	345225	1.30858	0.0509974	1.3372e-07	rs13118855(1),rs148009164(1),rs13353725(1),rs11936187(1),rs6858600(1),rs71595503(1),rs10017480(1),rs6830801(1),rs60422601(1),rs56077978(1),rs13133957(1),rs10488884(1),rs13145412(1),rs10032195(1),rs13101299(1),rs28462209(1),rs34682042(1),rs78267951(1),rs28369312(1),rs7654752(1)
CAD	DM	4	CCDC109B	protein_coding	non-coding intronic,intronic	110537251	rs36121800	C	T	C	36749	0.961834	0.109782	0.722991	NA
CAD	Overall	4	CCDC109B	protein_coding	non-coding intronic,intronic	110569620	rs78025076	T	C	T	381974	1.06598	0.0445308	0.151332	NA
CAD	noDM	4	CCDC109B	protein_coding	non-coding intronic,intronic	110569620	rs78025076	T	C	T	345225	1.0802	0.0496011	0.119878	NA
CAD	DM	4	CCDC109B	protein_coding	non-coding intronic,intronic	110569620	rs78025076	T	C	T	36749	1.00884	0.100461	0.930166	NA
CAD	Overall	4	CCDC109B	protein_coding	intronic,non-coding intronic,3downstream	110582100	rs17440280	C	T	C	381974	1.00955	0.0134595	0.480179	NA
CAD	noDM	4	CCDC109B	protein_coding	intronic,non-coding intronic,3downstream	110582100	rs17440280	C	T	C	345225	1.01833	0.0151062	0.229259	NA
CAD	DM	4	CCDC109B	protein_coding	intronic,non-coding intronic,3downstream	110582100	rs17440280	C	T	C	36749	0.976917	0.0295514	0.429377	NA
CAD	Overall	4	CCDC109B	protein_coding	non-coding intronic,intronic	110600672	rs28369312	T	C	T	381974	1.04597	0.0232527	0.0532259	NA
CAD	noDM	4	CCDC109B	protein_coding	non-coding intronic,intronic	110600672	rs28369312	T	C	T	345225	1.07214	0.0259075	0.00717099	NA
CAD	DM	4	CCDC109B	protein_coding	non-coding intronic,intronic	110600672	rs28369312	T	C	T	36749	0.948528	0.0523784	0.313028	NA
CAD	Overall	4	RP11-557J10.4	antisense	non-coding intronic	146567584	rs17014946	G	T	G	381974	0.976692	0.0155128	0.128442	NA
CAD	Overall	4	MMAA	protein_coding	non-coding,intronic	146567584	rs17014946	G	T	G	381974	0.976692	0.0155128	0.128442	NA
CAD	noDM	4	RP11-557J10.4	antisense	non-coding intronic	146567584	rs17014946	G	T	G	345225	0.996086	0.0173509	0.821197	NA
CAD	noDM	4	MMAA	protein_coding	non-coding,intronic	146567584	rs17014946	G	T	G	345225	0.996086	0.0173509	0.821197	NA
CAD	DM	4	RP11-557J10.4	antisense	non-coding intronic	146567584	rs17014946	G	T	G	36749	0.905473	0.0344586	0.00395589	NA
CAD	DM	4	MMAA	protein_coding	non-coding,intronic	146567584	rs17014946	G	T	G	36749	0.905473	0.0344586	0.00395589	NA
CAD	Overall	4	PALLD	protein_coding	intronic	169708457	rs12331592	C	T	C	381974	1.03416	0.0131624	0.0107168	NA
CAD	noDM	4	PALLD	protein_coding	intronic	169708457	rs12331592	C	T	C	345225	1.05283	0.0147725	0.000491846	NA
CAD	DM	4	PALLD	protein_coding	intronic	169708457	rs12331592	C	T	C	36749	0.965454	0.0289385	0.224417	NA
CAD	Overall	4	CBR4	protein_coding	non-coding intronic,intronic	169876537	rs113614541	C	A	C	381974	1.01025	0.0540749	0.850396	NA
CAD	noDM	4	CBR4	protein_coding	non-coding intronic,intronic	169876537	rs113614541	C	A	C	345225	0.980011	0.0617361	0.743617	NA
CAD	DM	4	CBR4	protein_coding	non-coding intronic,intronic	169876537	rs113614541	C	A	C	36749	1.12049	0.112562	0.312143	NA
CAD	Overall	5	TERT	protein_coding	non-coding intronic,intronic	1280028	rs2242652	A	G	A	381974	0.98093	0.0166545	0.24764	NA
CAD	noDM	5	TERT	protein_coding	non-coding intronic,intronic	1280028	rs2242652	A	G	A	345225	0.974985	0.0187297	0.176191	NA
CAD	DM	5	TERT	protein_coding	non-coding intronic,intronic	1280028	rs2242652	A	G	A	36749	1.00362	0.0363381	0.920753	NA
CAD	Overall	5	TERT	protein_coding	non-coding intronic,intronic	1282414	rs7725218	A	G	A	381974	0.965386	0.0137959	0.0106668	NA
CAD	noDM	5	TERT	protein_coding	non-coding intronic,intronic	1282414	rs7725218	A	G	A	345225	0.963188	0.0155126	0.0156138	NA
CAD	DM	5	TERT	protein_coding	non-coding intronic,intronic	1282414	rs7725218	A	G	A	36749	0.973455	0.0300877	0.371234	NA
CAD	Overall	5	WDR70	protein_coding	non-coding intronic,intronic	37670324	rs529647795	AG	A	AG	381974	0.996696	0.0145981	0.820658	NA
CAD	noDM	5	WDR70	protein_coding	non-coding intronic,intronic	37670324	rs529647795	AG	A	AG	345225	0.994341	0.0164395	0.729937	NA
CAD	DM	5	WDR70	protein_coding	non-coding intronic,intronic	37670324	rs529647795	AG	A	AG	36749	1.0056	0.0316742	0.860033	NA
CAD	Overall	5	NNT	protein_coding	intronic	43614589	rs62367623	G	A	G	381974	0.99208	0.0288256	0.782668	NA
CAD	noDM	5	NNT	protein_coding	intronic	43614589	rs62367623	G	A	G	345225	1.00156	0.0324125	0.961542	NA
CAD	DM	5	NNT	protein_coding	intronic	43614589	rs62367623	G	A	G	36749	0.962568	0.0627578	0.543255	NA
CAD	Overall	5	NNT	protein_coding	intronic	43665323	rs62367652	A	T	A	381974	0.996716	0.0291179	0.910057	NA
CAD	noDM	5	NNT	protein_coding	intronic	43665323	rs62367652	A	T	A	345225	1.00665	0.0327111	0.839319	NA
CAD	DM	5	NNT	protein_coding	intronic	43665323	rs62367652	A	T	A	36749	0.965475	0.0636171	0.580752	NA
CAD	Overall	5	KIF2A	protein_coding	non-coding intronic	61685944	rs3822487	G	A	G	381974	0.950675	0.0253575	0.0460643	NA
CAD	Overall	5	DIMT1	protein_coding	3downstream,non-coding intronic,intronic	61685944	rs3822487	G	A	G	381974	0.950675	0.0253575	0.0460643	NA
CAD	noDM	5	KIF2A	protein_coding	non-coding intronic	61685944	rs3822487	G	A	G	345225	0.941294	0.0286109	0.0344663	NA
CAD	noDM	5	DIMT1	protein_coding	3downstream,non-coding intronic,intronic	61685944	rs3822487	G	A	G	345225	0.941294	0.0286109	0.0344663	NA
CAD	DM	5	KIF2A	protein_coding	non-coding intronic	61685944	rs3822487	G	A	G	36749	0.985899	0.0547074	0.795187	NA
CAD	DM	5	DIMT1	protein_coding	3downstream,non-coding intronic,intronic	61685944	rs3822487	G	A	G	36749	0.985899	0.0547074	0.795187	NA
CAD	Overall	5	CDK7	protein_coding	coding nonsyn,3downstream,3utr	68568858	rs34584424	T	C	T	381974	1.09536	0.0406716	0.0251292	NA
CAD	noDM	5	CDK7	protein_coding	coding nonsyn,3downstream,3utr	68568858	rs34584424	T	C	T	345225	1.10867	0.0456137	0.0237216	NA
CAD	DM	5	CDK7	protein_coding	coding nonsyn,3downstream,3utr	68568858	rs34584424	T	C	T	36749	1.04862	0.0893996	0.595385	NA
CAD	Overall	5	MRPS27	protein_coding	non-coding intronic,intronic	71544539	rs750838224	T	TTAAA	TTAAA	381974	1.00137	0.0133521	0.918285	NA
CAD	noDM	5	MRPS27	protein_coding	non-coding intronic,intronic	71544539	rs750838224	T	TTAAA	TTAAA	345225	1.00598	0.014991	0.690665	NA
CAD	DM	5	MRPS27	protein_coding	non-coding intronic,intronic	71544539	rs750838224	T	TTAAA	TTAAA	36749	0.983612	0.0292947	0.572728	NA
CAD	Overall	5	COL4A3BP	protein_coding	3downstream,non-coding,intronic	74665860	rs3733907	C	G	C	381974	1.02186	0.0181609	0.233796	NA
CAD	noDM	5	COL4A3BP	protein_coding	3downstream,non-coding,intronic	74665860	rs3733907	C	G	C	345225	1.01344	0.0204382	0.513498	NA
CAD	DM	5	COL4A3BP	protein_coding	3downstream,non-coding,intronic	74665860	rs3733907	C	G	C	36749	1.05477	0.039544	0.177527	NA
CAD	Overall	5	COL4A3BP	protein_coding	intronic,3utr,non-coding intronic	74674975	rs10462517	C	T	C	381974	1.01791	0.0158302	0.262213	NA
CAD	noDM	5	COL4A3BP	protein_coding	intronic,3utr,non-coding intronic	74674975	rs10462517	C	T	C	345225	1.02678	0.0177399	0.136293	NA
CAD	DM	5	COL4A3BP	protein_coding	intronic,3utr,non-coding intronic	74674975	rs10462517	C	T	C	36749	0.982858	0.0349785	0.621081	NA
CAD	Overall	5	COL4A3BP	protein_coding	intronic	74693438	rs141549057	T	G	T	381974	0.836994	0.0664817	0.00743966	NA
CAD	noDM	5	COL4A3BP	protein_coding	intronic	74693438	rs141549057	T	G	T	345225	0.840602	0.0750365	0.020666	NA
CAD	DM	5	COL4A3BP	protein_coding	intronic	74693438	rs141549057	T	G	T	36749	0.822075	0.143022	0.170725	NA
CAD	Overall	5	COL4A3BP	protein_coding	intronic	74700126	rs185707939	C	A	C	381974	0.997958	0.0567253	0.971258	NA
CAD	noDM	5	COL4A3BP	protein_coding	intronic	74700126	rs185707939	C	A	C	345225	1.01306	0.0635625	0.838203	NA
CAD	DM	5	COL4A3BP	protein_coding	intronic	74700126	rs185707939	C	A	C	36749	0.943312	0.125118	0.640912	NA
CAD	Overall	5	COL4A3BP	protein_coding	intronic	74713742	rs182142147	A	G	A	381974	1.05082	0.059346	0.403539	NA
CAD	noDM	5	COL4A3BP	protein_coding	intronic	74713742	rs182142147	A	G	A	345225	1.09091	0.0651439	0.181642	NA
CAD	DM	5	COL4A3BP	protein_coding	intronic	74713742	rs182142147	A	G	A	36749	0.88256	0.142142	0.379458	NA
CAD	Overall	5	COL4A3BP	protein_coding	intronic	74717761	rs80324692	T	C	T	381974	0.990305	0.0240048	0.684855	NA
CAD	noDM	5	COL4A3BP	protein_coding	intronic	74717761	rs80324692	T	C	T	345225	1.00173	0.0269626	0.948764	NA
CAD	DM	5	COL4A3BP	protein_coding	intronic	74717761	rs80324692	T	C	T	36749	0.949133	0.0525079	0.320097	NA
CAD	Overall	5	COL4A3BP	protein_coding	intronic	74728175	rs75580049	A	G	A	381974	0.979595	0.0313244	0.510433	NA
CAD	noDM	5	COL4A3BP	protein_coding	intronic	74728175	rs75580049	A	G	A	345225	0.962398	0.0354386	0.279466	NA
CAD	DM	5	COL4A3BP	protein_coding	intronic	74728175	rs75580049	A	G	A	36749	1.04496	0.06713	0.512425	NA
CAD	Overall	5	COL4A3BP	protein_coding	intronic	74778480	rs80220036	C	T	C	381974	1.0081	0.0308864	0.794023	NA
CAD	noDM	5	COL4A3BP	protein_coding	intronic	74778480	rs80220036	C	T	C	345225	1.00118	0.0348092	0.973008	NA
CAD	DM	5	COL4A3BP	protein_coding	intronic	74778480	rs80220036	C	T	C	36749	1.03488	0.0668847	0.608237	NA
CAD	Overall	5	COL4A3BP	protein_coding	intronic	74782411	rs72768359	G	T	G	381974	0.995526	0.0198035	0.820868	NA
CAD	noDM	5	COL4A3BP	protein_coding	intronic	74782411	rs72768359	G	T	G	345225	0.992781	0.0223697	0.746032	NA
CAD	DM	5	COL4A3BP	protein_coding	intronic	74782411	rs72768359	G	T	G	36749	1.00547	0.0425035	0.897923	NA
CAD	Overall	5	COL4A3BP	protein_coding	intronic	74791319	rs146491289	A	G	A	381974	0.998451	0.0555363	0.977729	NA
CAD	noDM	5	COL4A3BP	protein_coding	intronic	74791319	rs146491289	A	G	A	345225	1.00579	0.0621827	0.925994	NA
CAD	DM	5	COL4A3BP	protein_coding	intronic	74791319	rs146491289	A	G	A	36749	0.976821	0.122845	0.8486	NA
CAD	Overall	5	COL4A3BP	protein_coding	intronic	74806104	rs5744533	T	C	T	381974	1.01854	0.0158355	0.245941	NA
CAD	noDM	5	COL4A3BP	protein_coding	intronic	74806104	rs5744533	T	C	T	345225	1.02743	0.0177454	0.127329	NA
CAD	DM	5	COL4A3BP	protein_coding	intronic	74806104	rs5744533	T	C	T	36749	0.983497	0.0349917	0.634386	NA
CAD	Overall	5	DMGDH	protein_coding	non-coding intronic	78416416	rs567754	T	C	T	381974	1.02664	0.0136805	0.0546045	NA
CAD	Overall	5	BHMT	protein_coding	5upstream,non-coding intronic,intronic,3downstream	78416416	rs567754	T	C	T	381974	1.02664	0.0136805	0.0546045	NA
CAD	noDM	5	DMGDH	protein_coding	non-coding intronic	78416416	rs567754	T	C	T	345225	1.04504	0.0153247	0.00404378	NA
CAD	noDM	5	BHMT	protein_coding	5upstream,non-coding intronic,intronic,3downstream	78416416	rs567754	T	C	T	345225	1.04504	0.0153247	0.00404378	NA
CAD	DM	5	DMGDH	protein_coding	non-coding intronic	78416416	rs567754	T	C	T	36749	0.959599	0.0302627	0.172964	NA
CAD	DM	5	BHMT	protein_coding	5upstream,non-coding intronic,intronic,3downstream	78416416	rs567754	T	C	T	36749	0.959599	0.0302627	0.172964	NA
CAD	Overall	5	BHMT	protein_coding	3downstream,non-coding intronic,intronic	78422570	rs10037045	T	A	T	381974	1.00817	0.0142205	0.567016	NA
CAD	Overall	5	DMGDH	protein_coding	non-coding intronic	78422570	rs10037045	T	A	T	381974	1.00817	0.0142205	0.567016	NA
CAD	noDM	5	BHMT	protein_coding	3downstream,non-coding intronic,intronic	78422570	rs10037045	T	A	T	345225	1.00687	0.0159784	0.668218	NA
CAD	noDM	5	DMGDH	protein_coding	non-coding intronic	78422570	rs10037045	T	A	T	345225	1.00687	0.0159784	0.668218	NA
CAD	DM	5	BHMT	protein_coding	3downstream,non-coding intronic,intronic	78422570	rs10037045	T	A	T	36749	1.01345	0.0311149	0.667614	NA
CAD	DM	5	DMGDH	protein_coding	non-coding intronic	78422570	rs10037045	T	A	T	36749	1.01345	0.0311149	0.667614	NA
CAD	Overall	5	DMGDH	protein_coding	non-coding intronic	78531337	rs1316753	C	G	C	381974	1.01828	0.0132318	0.171085	NA
CAD	noDM	5	DMGDH	protein_coding	non-coding intronic	78531337	rs1316753	C	G	C	345225	1.03149	0.0148502	0.0368089	NA
CAD	DM	5	DMGDH	protein_coding	non-coding intronic	78531337	rs1316753	C	G	C	36749	0.969599	0.0290728	0.288269	NA
CAD	Overall	5	CTD-2260A17.2	protein_coding	non-coding intronic	96223880	rs4869313	G	T	T	381974	1.03999	0.0130364	0.00263002	NA
CAD	Overall	5	ERAP2	protein_coding	intronic,5upstream	96223880	rs4869313	G	T	T	381974	1.03999	0.0130364	0.00263002	NA
CAD	noDM	5	CTD-2260A17.2	protein_coding	non-coding intronic	96223880	rs4869313	G	T	T	345225	1.04145	0.0146495	0.0055635	NA
CAD	noDM	5	ERAP2	protein_coding	intronic,5upstream	96223880	rs4869313	G	T	T	345225	1.04145	0.0146495	0.0055635	NA
CAD	DM	5	CTD-2260A17.2	protein_coding	non-coding intronic	96223880	rs4869313	G	T	T	36749	1.03338	0.0285101	0.249476	NA
CAD	DM	5	ERAP2	protein_coding	intronic,5upstream	96223880	rs4869313	G	T	T	36749	1.03338	0.0285101	0.249476	NA
CAD	Overall	5	ERAP2	protein_coding	3downstream,intronic	96252589	rs2910686	C	T	C	381974	1.03968	0.0130301	0.00282397	NA
CAD	Overall	5	CTD-2260A17.2	protein_coding	non-coding intronic	96252589	rs2910686	C	T	C	381974	1.03968	0.0130301	0.00282397	NA
CAD	noDM	5	ERAP2	protein_coding	3downstream,intronic	96252589	rs2910686	C	T	C	345225	1.04023	0.0146378	0.00704801	NA
CAD	noDM	5	CTD-2260A17.2	protein_coding	non-coding intronic	96252589	rs2910686	C	T	C	345225	1.04023	0.0146378	0.00704801	NA
CAD	DM	5	ERAP2	protein_coding	3downstream,intronic	96252589	rs2910686	C	T	C	36749	1.03695	0.0285211	0.203263	NA
CAD	DM	5	CTD-2260A17.2	protein_coding	non-coding intronic	96252589	rs2910686	C	T	C	36749	1.03695	0.0285211	0.203263	NA
CAD	Overall	5	LNPEP	protein_coding	intronic	96302572	rs114110091	T	C	T	381974	1.06787	0.0263873	0.0128307	NA
CAD	noDM	5	LNPEP	protein_coding	intronic	96302572	rs114110091	T	C	T	345225	1.04762	0.0298931	0.119644	NA
CAD	DM	5	LNPEP	protein_coding	intronic	96302572	rs114110091	T	C	T	36749	1.1471	0.0563086	0.0147971	NA
CAD	Overall	5	LNPEP	protein_coding	intronic	96344592	rs112824186	A	G	A	381974	0.959721	0.0413497	0.320088	NA
CAD	noDM	5	LNPEP	protein_coding	intronic	96344592	rs112824186	A	G	A	345225	0.943128	0.0468327	0.211205	NA
CAD	DM	5	LNPEP	protein_coding	intronic	96344592	rs112824186	A	G	A	36749	1.02698	0.088099	0.762491	NA
CAD	Overall	5	HSD17B4	protein_coding	non-coding intronic,intronic	118789338	rs6897978	G	A	G	381974	0.992066	0.0161933	0.622787	NA
CAD	noDM	5	HSD17B4	protein_coding	non-coding intronic,intronic	118789338	rs6897978	G	A	G	345225	0.999432	0.0181476	0.975042	NA
CAD	DM	5	HSD17B4	protein_coding	non-coding intronic,intronic	118789338	rs6897978	G	A	G	36749	0.965138	0.0357539	0.320973	NA
CAD	Overall	5	HSD17B4	protein_coding	non-coding intronic,intronic	118798793	rs2451814	A	C	A	381974	0.987043	0.0138827	0.347524	NA
CAD	noDM	5	HSD17B4	protein_coding	non-coding intronic,intronic	118798793	rs2451814	A	C	A	345225	0.989471	0.0155988	0.497411	NA
CAD	DM	5	HSD17B4	protein_coding	non-coding intronic,intronic	118798793	rs2451814	A	C	A	36749	0.97691	0.0303621	0.441654	NA
CAD	Overall	5	ACSL6	protein_coding	intronic,non-coding	131320462	rs253942	T	C	T	381974	1.00268	0.0280148	0.92384	NA
CAD	noDM	5	ACSL6	protein_coding	intronic,non-coding	131320462	rs253942	T	C	T	345225	0.995444	0.0315629	0.884975	NA
CAD	DM	5	ACSL6	protein_coding	intronic,non-coding	131320462	rs253942	T	C	T	36749	1.02739	0.0607538	0.656542	NA
CAD	Overall	5	SLC22A5	protein_coding	5upstream,intronic	131709911	rs546280079	CA	C	CA	381974	1.02131	0.0170643	0.216609	NA
CAD	noDM	5	SLC22A5	protein_coding	5upstream,intronic	131709911	rs546280079	CA	C	CA	345225	1.00539	0.0192678	0.780074	NA
CAD	DM	5	SLC22A5	protein_coding	5upstream,intronic	131709911	rs546280079	CA	C	CA	36749	1.08136	0.0367404	0.0332653	NA
CAD	Overall	5	ATP6V0E1P1	pseudogene	non-coding	132284251	rs17691584	C	A	C	381974	1.00412	0.0172149	0.811094	NA
CAD	Overall	5	AFF4	protein_coding	non-coding intronic,intronic	132284251	rs17691584	C	A	C	381974	1.00412	0.0172149	0.811094	NA
CAD	noDM	5	ATP6V0E1P1	pseudogene	non-coding	132284251	rs17691584	C	A	C	345225	1.01224	0.0193165	0.52896	NA
CAD	noDM	5	AFF4	protein_coding	non-coding intronic,intronic	132284251	rs17691584	C	A	C	345225	1.01224	0.0193165	0.52896	NA
CAD	DM	5	ATP6V0E1P1	pseudogene	non-coding	132284251	rs17691584	C	A	C	36749	0.973427	0.0378354	0.476564	NA
CAD	DM	5	AFF4	protein_coding	non-coding intronic,intronic	132284251	rs17691584	C	A	C	36749	0.973427	0.0378354	0.476564	NA
CAD	Overall	5	HARS	protein_coding	3downstream,non-coding intronic,intronic	140061761	rs61093427	T	C	T	381974	1.03315	0.0154377	0.0346211	NA
CAD	noDM	5	HARS	protein_coding	3downstream,non-coding intronic,intronic	140061761	rs61093427	T	C	T	345225	1.0387	0.0173044	0.0282232	NA
CAD	DM	5	HARS	protein_coding	3downstream,non-coding intronic,intronic	140061761	rs61093427	T	C	T	36749	1.01283	0.0340404	0.707963	NA
CAD	Overall	5	CANX	protein_coding	5utr,intronic,5upstream	179125678	rs17079630	G	C	G	381974	1.03861	0.0170343	0.0261478	NA
CAD	noDM	5	CANX	protein_coding	5utr,intronic,5upstream	179125678	rs17079630	G	C	G	345225	1.03795	0.0191299	0.0515175	NA
CAD	DM	5	CANX	protein_coding	5utr,intronic,5upstream	179125678	rs17079630	G	C	G	36749	1.04445	0.037319	0.243866	NA
CAD	Overall	6	FARS2	protein_coding	intronic	5524393	rs9405273	A	G	G	381974	1.00418	0.0132909	0.753585	NA
CAD	noDM	6	FARS2	protein_coding	intronic	5524393	rs9405273	A	G	G	345225	1.00004	0.0149321	0.997869	NA
CAD	DM	6	FARS2	protein_coding	intronic	5524393	rs9405273	A	G	G	36749	1.01861	0.0290988	0.526291	NA
CAD	Overall	6	RNF144B	protein_coding	intronic	18412469	rs6931433	G	C	G	381974	1.02279	0.0162658	0.16602	NA
CAD	noDM	6	RNF144B	protein_coding	intronic	18412469	rs6931433	G	C	G	345225	1.02002	0.0183234	0.279445	NA
CAD	DM	6	RNF144B	protein_coding	intronic	18412469	rs6931433	G	C	G	36749	1.03322	0.0352656	0.354076	NA
CAD	Overall	6	HFE	protein_coding	non-coding intronic,intronic	26090270	rs34555420	T	G	T	381974	0.989054	0.0216363	0.610964	NA
CAD	noDM	6	HFE	protein_coding	non-coding intronic,intronic	26090270	rs34555420	T	G	T	345225	0.988878	0.024443	0.64726	NA
CAD	DM	6	HFE	protein_coding	non-coding intronic,intronic	26090270	rs34555420	T	G	T	36749	0.992449	0.0463763	0.870172	NA
CAD	Overall	6	HFE	protein_coding	non-coding,coding nonsyn,intronic,5upstream	26091179	rs1799945	G	C	G	381974	0.978851	0.018237	0.241148	NA
CAD	noDM	6	HFE	protein_coding	non-coding,coding nonsyn,intronic,5upstream	26091179	rs1799945	G	C	G	345225	0.988257	0.0204182	0.562922	NA
CAD	DM	6	HFE	protein_coding	non-coding,coding nonsyn,intronic,5upstream	26091179	rs1799945	G	C	G	36749	0.944112	0.040379	0.154367	NA
CAD	Overall	6	HFE	protein_coding	intronic,5upstream,non-coding intronic	26092170	rs2032451	T	G	T	381974	0.981856	0.0181597	0.313296	NA
CAD	noDM	6	HFE	protein_coding	intronic,5upstream,non-coding intronic	26092170	rs2032451	T	G	T	345225	0.989386	0.0203434	0.599894	NA
CAD	DM	6	HFE	protein_coding	intronic,5upstream,non-coding intronic	26092170	rs2032451	T	G	T	36749	0.954116	0.0401258	0.241768	NA
CAD	Overall	6	HFE	protein_coding	5upstream,non-coding,intronic,coding nonsyn	26093141	rs1800562	A	G	A	381974	0.960728	0.0244119	0.10076	NA
CAD	noDM	6	HFE	protein_coding	5upstream,non-coding,intronic,coding nonsyn	26093141	rs1800562	A	G	A	345225	0.963426	0.0275722	0.176584	NA
CAD	DM	6	HFE	protein_coding	5upstream,non-coding,intronic,coding nonsyn	26093141	rs1800562	A	G	A	36749	0.952857	0.0523926	0.356684	NA
CAD	Overall	6	HFE	protein_coding	3downstream,3utr	26095442	rs143278243	A	G	A	381974	0.98563	0.0609058	0.812158	NA
CAD	noDM	6	HFE	protein_coding	3downstream,3utr	26095442	rs143278243	A	G	A	345225	0.983295	0.0681282	0.804699	NA
CAD	DM	6	HFE	protein_coding	3downstream,3utr	26095442	rs143278243	A	G	A	36749	0.991461	0.13569	0.949608	NA
CAD	Overall	6	HFE	protein_coding	3downstream,3utr	26097384	rs6918586	C	T	C	381974	0.989792	0.0131703	0.435945	NA
CAD	noDM	6	HFE	protein_coding	3downstream,3utr	26097384	rs6918586	C	T	C	345225	0.989107	0.0148112	0.459598	NA
CAD	DM	6	HFE	protein_coding	3downstream,3utr	26097384	rs6918586	C	T	C	36749	0.992481	0.0287059	0.792609	NA
CAD	Overall	6	HFE	protein_coding	3utr	26098474	rs79220007	C	T	C	381974	0.962404	0.0244847	0.117557	NA
CAD	noDM	6	HFE	protein_coding	3utr	26098474	rs79220007	C	T	C	345225	0.964573	0.0276652	0.192302	NA
CAD	DM	6	HFE	protein_coding	3utr	26098474	rs79220007	C	T	C	36749	0.956523	0.05248	0.396992	NA
CAD	Overall	6	BTN2A2	protein_coding	3downstream,intronic,3utr	26391395	rs2237235	G	A	G	381974	0.983191	0.0152341	0.265819	NA
CAD	noDM	6	BTN2A2	protein_coding	3downstream,intronic,3utr	26391395	rs2237235	G	A	G	345225	0.975481	0.0171956	0.148831	NA
CAD	DM	6	BTN2A2	protein_coding	3downstream,intronic,3utr	26391395	rs2237235	G	A	G	36749	1.01374	0.0328184	0.677568	NA
CAD	Overall	6	BTN2A2	protein_coding	3downstream,coding nonsyn,3utr,intronic	26392515	rs2072803	C	G	C	381974	0.998009	0.0189222	0.91613	NA
CAD	noDM	6	BTN2A2	protein_coding	3downstream,coding nonsyn,3utr,intronic	26392515	rs2072803	C	G	C	345225	0.987295	0.0214034	0.550233	NA
CAD	DM	6	BTN2A2	protein_coding	3downstream,coding nonsyn,3utr,intronic	26392515	rs2072803	C	G	C	36749	1.03994	0.0404781	0.333343	NA
CAD	Overall	6	PPP1R11	protein_coding	intronic,5utr	30036333	rs17187693	C	G	C	381974	1.03129	0.0269651	0.253215	NA
CAD	noDM	6	PPP1R11	protein_coding	intronic,5utr	30036333	rs17187693	C	G	C	345225	1.06705	0.0298497	0.0296866	NA
CAD	DM	6	PPP1R11	protein_coding	intronic,5utr	30036333	rs17187693	C	G	C	36749	0.895004	0.0623298	0.0751292	NA
CAD	Overall	6	TRIM31	protein_coding	3downstream,3utr,non-coding intronic,intronic	30071110	rs2240070	C	T	T	381974	0.996799	0.013804	0.816322	NA
CAD	noDM	6	TRIM31	protein_coding	3downstream,3utr,non-coding intronic,intronic	30071110	rs2240070	C	T	T	345225	0.997875	0.0155074	0.890903	NA
CAD	DM	6	TRIM31	protein_coding	3downstream,3utr,non-coding intronic,intronic	30071110	rs2240070	C	T	T	36749	0.99134	0.0302101	0.773416	NA
CAD	Overall	6	TRIM31-AS1	antisense	non-coding intronic	30073847	rs2844795	T	C	C	381974	0.983116	0.0129736	0.189345	NA
CAD	Overall	6	TRIM31	protein_coding	5upstream,intronic,non-coding intronic	30073847	rs2844795	T	C	C	381974	0.983116	0.0129736	0.189345	NA
CAD	noDM	6	TRIM31-AS1	antisense	non-coding intronic	30073847	rs2844795	T	C	C	345225	0.983027	0.0145859	0.240537	NA
CAD	noDM	6	TRIM31	protein_coding	5upstream,intronic,non-coding intronic	30073847	rs2844795	T	C	C	345225	0.983027	0.0145859	0.240537	NA
CAD	DM	6	TRIM31-AS1	antisense	non-coding intronic	30073847	rs2844795	T	C	C	36749	0.983782	0.0283229	0.563737	NA
CAD	DM	6	TRIM31	protein_coding	5upstream,intronic,non-coding intronic	30073847	rs2844795	T	C	C	36749	0.983782	0.0283229	0.563737	NA
CAD	Overall	6	TRIM31-AS1	antisense	non-coding intronic	30074028	rs9261407	C	T	T	381974	0.977013	0.0174803	0.183388	NA
CAD	Overall	6	TRIM31	protein_coding	non-coding intronic,5upstream,intronic	30074028	rs9261407	C	T	T	381974	0.977013	0.0174803	0.183388	NA
CAD	noDM	6	TRIM31-AS1	antisense	non-coding intronic	30074028	rs9261407	C	T	T	345225	0.976289	0.0196236	0.221387	NA
CAD	noDM	6	TRIM31	protein_coding	non-coding intronic,5upstream,intronic	30074028	rs9261407	C	T	T	345225	0.976289	0.0196236	0.221387	NA
CAD	DM	6	TRIM31-AS1	antisense	non-coding intronic	30074028	rs9261407	C	T	T	36749	0.978133	0.0383787	0.564561	NA
CAD	DM	6	TRIM31	protein_coding	non-coding intronic,5upstream,intronic	30074028	rs9261407	C	T	T	36749	0.978133	0.0383787	0.564561	NA
CAD	Overall	6	TRIM31	protein_coding	non-coding intronic,5upstream,intronic	30074072	rs2517601	C	G	C	381974	0.965731	0.0189992	0.066452	NA
CAD	Overall	6	TRIM31-AS1	antisense	non-coding intronic	30074072	rs2517601	C	G	C	381974	0.965731	0.0189992	0.066452	NA
CAD	noDM	6	TRIM31	protein_coding	non-coding intronic,5upstream,intronic	30074072	rs2517601	C	G	C	345225	0.960114	0.0214687	0.0579683	NA
CAD	noDM	6	TRIM31-AS1	antisense	non-coding intronic	30074072	rs2517601	C	G	C	345225	0.960114	0.0214687	0.0579683	NA
CAD	DM	6	TRIM31	protein_coding	non-coding intronic,5upstream,intronic	30074072	rs2517601	C	G	C	36749	0.987591	0.0407238	0.759128	NA
CAD	DM	6	TRIM31-AS1	antisense	non-coding intronic	30074072	rs2517601	C	G	C	36749	0.987591	0.0407238	0.759128	NA
CAD	Overall	6	TRIM31-AS1	antisense	non-coding intronic	30075864	rs2023472	G	A	A	381974	0.98669	0.0131947	0.309855	NA
CAD	Overall	6	TRIM31	protein_coding	non-coding,3downstream,coding nonsyn|syn	30075864	rs2023472	G	A	A	381974	0.98669	0.0131947	0.309855	NA
CAD	noDM	6	TRIM31-AS1	antisense	non-coding intronic	30075864	rs2023472	G	A	A	345225	0.9776	0.0148332	0.126689	NA
CAD	noDM	6	TRIM31	protein_coding	non-coding,3downstream,coding nonsyn|syn	30075864	rs2023472	G	A	A	345225	0.9776	0.0148332	0.126689	NA
CAD	DM	6	TRIM31-AS1	antisense	non-coding intronic	30075864	rs2023472	G	A	A	36749	1.02141	0.0288275	0.462384	NA
CAD	DM	6	TRIM31	protein_coding	non-coding,3downstream,coding nonsyn|syn	30075864	rs2023472	G	A	A	36749	1.02141	0.0288275	0.462384	NA
CAD	Overall	6	TRIM31	protein_coding	non-coding intronic,3downstream,5upstream,intronic	30077135	rs9378220	A	C	A	381974	1.01746	0.0180632	0.338064	NA
CAD	Overall	6	TRIM31-AS1	antisense	non-coding intronic	30077135	rs9378220	A	C	A	381974	1.01746	0.0180632	0.338064	NA
CAD	noDM	6	TRIM31	protein_coding	non-coding intronic,3downstream,5upstream,intronic	30077135	rs9378220	A	C	A	345225	1.01954	0.0202704	0.339798	NA
CAD	noDM	6	TRIM31-AS1	antisense	non-coding intronic	30077135	rs9378220	A	C	A	345225	1.01954	0.0202704	0.339798	NA
CAD	DM	6	TRIM31	protein_coding	non-coding intronic,3downstream,5upstream,intronic	30077135	rs9378220	A	C	A	36749	1.00771	0.0396962	0.846599	NA
CAD	DM	6	TRIM31-AS1	antisense	non-coding intronic	30077135	rs9378220	A	C	A	36749	1.00771	0.0396962	0.846599	NA
CAD	Overall	6	TRIM39	protein_coding	5upstream,intronic	30296253	rs3094064	A	G	A	381974	0.953242	0.0191434	0.0123687	NA
CAD	noDM	6	TRIM39	protein_coding	5upstream,intronic	30296253	rs3094064	A	G	A	345225	0.949589	0.0216362	0.0168143	NA
CAD	DM	6	TRIM39	protein_coding	5upstream,intronic	30296253	rs3094064	A	G	A	36749	0.968191	0.0410029	0.430468	NA
CAD	Overall	6	TRIM39	protein_coding	3downstream,intronic	30299245	rs3094067	G	T	G	381974	0.951622	0.019359	0.0104234	NA
CAD	Overall	6	TRIM39-RPP21	protein_coding	intronic	30299245	rs3094067	G	T	G	381974	0.951622	0.019359	0.0104234	NA
CAD	noDM	6	TRIM39	protein_coding	3downstream,intronic	30299245	rs3094067	G	T	G	345225	0.946692	0.0218818	0.0122969	NA
CAD	noDM	6	TRIM39-RPP21	protein_coding	intronic	30299245	rs3094067	G	T	G	345225	0.946692	0.0218818	0.0122969	NA
CAD	DM	6	TRIM39	protein_coding	3downstream,intronic	30299245	rs3094067	G	T	G	36749	0.970862	0.0414588	0.475689	NA
CAD	DM	6	TRIM39-RPP21	protein_coding	intronic	30299245	rs3094067	G	T	G	36749	0.970862	0.0414588	0.475689	NA
CAD	Overall	6	TRIM39-RPP21	protein_coding	intronic	30301600	rs12663184	T	C	T	381974	1.01557	0.0203371	0.447481	NA
CAD	Overall	6	TRIM39	protein_coding	intronic	30301600	rs12663184	T	C	T	381974	1.01557	0.0203371	0.447481	NA
CAD	noDM	6	TRIM39-RPP21	protein_coding	intronic	30301600	rs12663184	T	C	T	345225	1.01809	0.0228593	0.432982	NA
CAD	noDM	6	TRIM39	protein_coding	intronic	30301600	rs12663184	T	C	T	345225	1.01809	0.0228593	0.432982	NA
CAD	DM	6	TRIM39-RPP21	protein_coding	intronic	30301600	rs12663184	T	C	T	36749	1.00835	0.0444026	0.851454	NA
CAD	DM	6	TRIM39	protein_coding	intronic	30301600	rs12663184	T	C	T	36749	1.00835	0.0444026	0.851454	NA
CAD	Overall	6	TRIM39-RPP21	protein_coding	intronic	30304818	rs115544616	A	G	A	381974	1.02776	0.0559769	0.62477	NA
CAD	Overall	6	TRIM39	protein_coding	3downstream,intronic	30304818	rs115544616	A	G	A	381974	1.02776	0.0559769	0.62477	NA
CAD	noDM	6	TRIM39-RPP21	protein_coding	intronic	30304818	rs115544616	A	G	A	345225	1.01516	0.0628739	0.810836	NA
CAD	noDM	6	TRIM39	protein_coding	3downstream,intronic	30304818	rs115544616	A	G	A	345225	1.01516	0.0628739	0.810836	NA
CAD	DM	6	TRIM39-RPP21	protein_coding	intronic	30304818	rs115544616	A	G	A	36749	1.07171	0.122945	0.573201	NA
CAD	DM	6	TRIM39	protein_coding	3downstream,intronic	30304818	rs115544616	A	G	A	36749	1.07171	0.122945	0.573201	NA
CAD	Overall	6	TRIM39-RPP21	protein_coding	intronic	30306553	rs3129838	A	G	G	381974	1.00906	0.0196017	0.645517	NA
CAD	Overall	6	TRIM39	protein_coding	intronic	30306553	rs3129838	A	G	G	381974	1.00906	0.0196017	0.645517	NA
CAD	noDM	6	TRIM39-RPP21	protein_coding	intronic	30306553	rs3129838	A	G	G	345225	1.01268	0.0220014	0.566924	NA
CAD	noDM	6	TRIM39	protein_coding	intronic	30306553	rs3129838	A	G	G	345225	1.01268	0.0220014	0.566924	NA
CAD	DM	6	TRIM39-RPP21	protein_coding	intronic	30306553	rs3129838	A	G	G	36749	0.995412	0.0430443	0.914929	NA
CAD	DM	6	TRIM39	protein_coding	intronic	30306553	rs3129838	A	G	G	36749	0.995412	0.0430443	0.914929	NA
CAD	Overall	6	TRIM39	protein_coding	intronic	30307342	rs3129840	C	G	C	381974	0.975342	0.0171617	0.14572	NA
CAD	Overall	6	TRIM39-RPP21	protein_coding	intronic	30307342	rs3129840	C	G	C	381974	0.975342	0.0171617	0.14572	NA
CAD	noDM	6	TRIM39	protein_coding	intronic	30307342	rs3129840	C	G	C	345225	0.969703	0.0193655	0.112131	NA
CAD	noDM	6	TRIM39-RPP21	protein_coding	intronic	30307342	rs3129840	C	G	C	345225	0.969703	0.0193655	0.112131	NA
CAD	DM	6	TRIM39	protein_coding	intronic	30307342	rs3129840	C	G	C	36749	0.997527	0.0369913	0.946639	NA
CAD	DM	6	TRIM39-RPP21	protein_coding	intronic	30307342	rs3129840	C	G	C	36749	0.997527	0.0369913	0.946639	NA
CAD	Overall	6	TUBB	protein_coding	5upstream,intronic	30689001	rs3132582	A	T	A	381974	0.963709	0.0179416	0.039365	NA
CAD	noDM	6	TUBB	protein_coding	5upstream,intronic	30689001	rs3132582	A	T	A	345225	0.955533	0.0203115	0.0251287	NA
CAD	DM	6	TUBB	protein_coding	5upstream,intronic	30689001	rs3132582	A	T	A	36749	0.995396	0.0382432	0.903956	NA
CAD	Overall	6	FLOT1	protein_coding	3downstream,non-coding intronic,intronic	30696762	rs4947288	G	A	G	381974	1.00038	0.0156854	0.980526	NA
CAD	noDM	6	FLOT1	protein_coding	3downstream,non-coding intronic,intronic	30696762	rs4947288	G	A	G	345225	1.00652	0.0175841	0.71184	NA
CAD	DM	6	FLOT1	protein_coding	3downstream,non-coding intronic,intronic	30696762	rs4947288	G	A	G	36749	0.977271	0.0345985	0.506367	NA
CAD	Overall	6	FLOT1	protein_coding	non-coding intronic,intronic	30699022	rs3095327	A	G	A	381974	0.963546	0.0179448	0.0385072	NA
CAD	noDM	6	FLOT1	protein_coding	non-coding intronic,intronic	30699022	rs3095327	A	G	A	345225	0.9552	0.020316	0.0240664	NA
CAD	DM	6	FLOT1	protein_coding	non-coding intronic,intronic	30699022	rs3095327	A	G	A	36749	0.995866	0.0382455	0.91375	NA
CAD	Overall	6	GTF2H4	protein_coding	3downstream,5upstream,non-coding,non-coding intronic,intronic	30879987	rs1264308	T	C	T	381974	0.963921	0.0182379	0.0439255	NA
CAD	Overall	6	VARS2	protein_coding	5upstream,non-coding	30879987	rs1264308	T	C	T	381974	0.963921	0.0182379	0.0439255	NA
CAD	noDM	6	GTF2H4	protein_coding	3downstream,5upstream,non-coding,non-coding intronic,intronic	30879987	rs1264308	T	C	T	345225	0.959345	0.0206294	0.0442306	NA
CAD	noDM	6	VARS2	protein_coding	5upstream,non-coding	30879987	rs1264308	T	C	T	345225	0.959345	0.0206294	0.0442306	NA
CAD	DM	6	GTF2H4	protein_coding	3downstream,5upstream,non-coding,non-coding intronic,intronic	30879987	rs1264308	T	C	T	36749	0.981007	0.0389649	0.622637	NA
CAD	DM	6	VARS2	protein_coding	5upstream,non-coding	30879987	rs1264308	T	C	T	36749	0.981007	0.0389649	0.622637	NA
CAD	Overall	6	VARS2	protein_coding	5upstream,non-coding,5utr,non-coding intronic,intronic	30882415	rs1264304	T	C	T	381974	0.964246	0.0182369	0.0458893	NA
CAD	noDM	6	VARS2	protein_coding	5upstream,non-coding,5utr,non-coding intronic,intronic	30882415	rs1264304	T	C	T	345225	0.959883	0.020626	0.0471378	NA
CAD	DM	6	VARS2	protein_coding	5upstream,non-coding,5utr,non-coding intronic,intronic	30882415	rs1264304	T	C	T	36749	0.980471	0.0389768	0.612849	NA
CAD	Overall	6	VARS2	protein_coding	3downstream,non-coding intronic,5upstream,intronic	30885990	rs140159913	A	G	A	381974	0.975725	0.0604781	0.684493	NA
CAD	noDM	6	VARS2	protein_coding	3downstream,non-coding intronic,5upstream,intronic	30885990	rs140159913	A	G	A	345225	0.954233	0.0680369	0.4911	NA
CAD	DM	6	VARS2	protein_coding	3downstream,non-coding intronic,5upstream,intronic	30885990	rs140159913	A	G	A	36749	1.05422	0.132348	0.689931	NA
CAD	Overall	6	MCCD1	protein_coding	5utr	31496791	rs2516480	G	C	G	381974	1.00887	0.0188944	0.640132	NA
CAD	noDM	6	MCCD1	protein_coding	5utr	31496791	rs2516480	G	C	G	345225	0.998024	0.021434	0.926457	NA
CAD	DM	6	MCCD1	protein_coding	5utr	31496791	rs2516480	G	C	G	36749	1.04686	0.0399927	0.252161	NA
CAD	Overall	6	MCCD1	protein_coding	intronic	31497310	rs114064880	A	G	A	381974	1.00801	0.0526912	0.879646	NA
CAD	noDM	6	MCCD1	protein_coding	intronic	31497310	rs114064880	A	G	A	345225	0.98073	0.0597674	0.744761	NA
CAD	DM	6	MCCD1	protein_coding	intronic	31497310	rs114064880	A	G	A	36749	1.11117	0.112147	0.347235	NA
CAD	Overall	6	ATP6V1G2-DDX39B	protein_coding	intronic,non-coding intronic	31512799	rs2071593	A	G	A	381974	0.996091	0.0277305	0.887687	NA
CAD	Overall	6	ATP6V1G2	protein_coding	3utr,3downstream	31512799	rs2071593	A	G	A	381974	0.996091	0.0277305	0.887687	NA
CAD	noDM	6	ATP6V1G2-DDX39B	protein_coding	intronic,non-coding intronic	31512799	rs2071593	A	G	A	345225	0.99187	0.0311502	0.793278	NA
CAD	noDM	6	ATP6V1G2	protein_coding	3utr,3downstream	31512799	rs2071593	A	G	A	345225	0.99187	0.0311502	0.793278	NA
CAD	DM	6	ATP6V1G2-DDX39B	protein_coding	intronic,non-coding intronic	31512799	rs2071593	A	G	A	36749	1.01309	0.0607698	0.830482	NA
CAD	DM	6	ATP6V1G2	protein_coding	3utr,3downstream	31512799	rs2071593	A	G	A	36749	1.01309	0.0607698	0.830482	NA
CAD	Overall	6	ATP6V1G2-DDX39B	protein_coding	intronic,non-coding intronic	31513559	rs2523503	A	C	A	381974	1.01911	0.0179365	0.291271	NA
CAD	Overall	6	ATP6V1G2	protein_coding	non-coding,intronic,non-coding intronic	31513559	rs2523503	A	C	A	381974	1.01911	0.0179365	0.291271	NA
CAD	noDM	6	ATP6V1G2-DDX39B	protein_coding	intronic,non-coding intronic	31513559	rs2523503	A	C	A	345225	1.01455	0.0202873	0.476358	NA
CAD	noDM	6	ATP6V1G2	protein_coding	non-coding,intronic,non-coding intronic	31513559	rs2523503	A	C	A	345225	1.01455	0.0202873	0.476358	NA
CAD	DM	6	ATP6V1G2-DDX39B	protein_coding	intronic,non-coding intronic	31513559	rs2523503	A	C	A	36749	1.03514	0.0383228	0.367442	NA
CAD	DM	6	ATP6V1G2	protein_coding	non-coding,intronic,non-coding intronic	31513559	rs2523503	A	C	A	36749	1.03514	0.0383228	0.367442	NA
CAD	Overall	6	ATP6V1G2-DDX39B	protein_coding	intronic,non-coding intronic	31514247	rs9267488	G	A	G	381974	0.958113	0.0188735	0.0233806	NA
CAD	Overall	6	ATP6V1G2	protein_coding	intronic,non-coding intronic	31514247	rs9267488	G	A	G	381974	0.958113	0.0188735	0.0233806	NA
CAD	noDM	6	ATP6V1G2-DDX39B	protein_coding	intronic,non-coding intronic	31514247	rs9267488	G	A	G	345225	0.954644	0.0213422	0.0296401	NA
CAD	noDM	6	ATP6V1G2	protein_coding	intronic,non-coding intronic	31514247	rs9267488	G	A	G	345225	0.954644	0.0213422	0.0296401	NA
CAD	DM	6	ATP6V1G2-DDX39B	protein_coding	intronic,non-coding intronic	31514247	rs9267488	G	A	G	36749	0.971256	0.0403441	0.469733	NA
CAD	DM	6	ATP6V1G2	protein_coding	intronic,non-coding intronic	31514247	rs9267488	G	A	G	36749	0.971256	0.0403441	0.469733	NA
CAD	Overall	6	CSNK2B	protein_coding	5upstream,intronic	31633496	rs3117579	T	G	T	381974	0.965798	0.0164513	0.0343971	NA
CAD	Overall	6	GPANK1	protein_coding	5utr,5upstream,intronic	31633496	rs3117579	T	G	T	381974	0.965798	0.0164513	0.0343971	NA
CAD	noDM	6	CSNK2B	protein_coding	5upstream,intronic	31633496	rs3117579	T	G	T	345225	0.957597	0.0186023	0.0198493	NA
CAD	noDM	6	GPANK1	protein_coding	5utr,5upstream,intronic	31633496	rs3117579	T	G	T	345225	0.957597	0.0186023	0.0198493	NA
CAD	DM	6	CSNK2B	protein_coding	5upstream,intronic	31633496	rs3117579	T	G	T	36749	0.996132	0.0351975	0.912325	NA
CAD	DM	6	GPANK1	protein_coding	5utr,5upstream,intronic	31633496	rs3117579	T	G	T	36749	0.996132	0.0351975	0.912325	NA
CAD	Overall	6	CSNK2B	protein_coding	intronic,non-coding intronic	31634288	rs539322116	CT	C	CT	381974	1.00687	0.0566116	0.903754	NA
CAD	Overall	6	CSNK2B-LY6G5B-1181	protein_coding	intronic	31634288	rs539322116	CT	C	CT	381974	1.00687	0.0566116	0.903754	NA
CAD	noDM	6	CSNK2B	protein_coding	intronic,non-coding intronic	31634288	rs539322116	CT	C	CT	345225	0.981495	0.0641755	0.771017	NA
CAD	noDM	6	CSNK2B-LY6G5B-1181	protein_coding	intronic	31634288	rs539322116	CT	C	CT	345225	0.981495	0.0641755	0.771017	NA
CAD	DM	6	CSNK2B	protein_coding	intronic,non-coding intronic	31634288	rs539322116	CT	C	CT	36749	1.10207	0.120528	0.420023	NA
CAD	DM	6	CSNK2B-LY6G5B-1181	protein_coding	intronic	31634288	rs539322116	CT	C	CT	36749	1.10207	0.120528	0.420023	NA
CAD	Overall	6	CSNK2B	protein_coding	3downstream,coding syn,non-coding	31635710	rs14365	C	T	C	381974	1.0133	0.0169004	0.43427	NA
CAD	Overall	6	CSNK2B-LY6G5B-1181	protein_coding	coding syn,5upstream	31635710	rs14365	C	T	C	381974	1.0133	0.0169004	0.43427	NA
CAD	noDM	6	CSNK2B	protein_coding	3downstream,coding syn,non-coding	31635710	rs14365	C	T	C	345225	0.999607	0.0190517	0.983522	NA
CAD	noDM	6	CSNK2B-LY6G5B-1181	protein_coding	coding syn,5upstream	31635710	rs14365	C	T	C	345225	0.999607	0.0190517	0.983522	NA
CAD	DM	6	CSNK2B	protein_coding	3downstream,coding syn,non-coding	31635710	rs14365	C	T	C	36749	1.0645	0.0365991	0.0876559	NA
CAD	DM	6	CSNK2B-LY6G5B-1181	protein_coding	coding syn,5upstream	31635710	rs14365	C	T	C	36749	1.0645	0.0365991	0.0876559	NA
CAD	Overall	6	CSNK2B-LY6G5B-1181	protein_coding	intronic,5upstream	31636031	rs3117578	G	A	A	381974	0.957793	0.0183591	0.0188295	NA
CAD	Overall	6	CSNK2B	protein_coding	intronic,3downstream,non-coding intronic	31636031	rs3117578	G	A	A	381974	0.957793	0.0183591	0.0188295	NA
CAD	noDM	6	CSNK2B-LY6G5B-1181	protein_coding	intronic,5upstream	31636031	rs3117578	G	A	A	345225	0.972343	0.0204249	0.169702	NA
CAD	noDM	6	CSNK2B	protein_coding	intronic,3downstream,non-coding intronic	31636031	rs3117578	G	A	A	345225	0.972343	0.0204249	0.169702	NA
CAD	DM	6	CSNK2B-LY6G5B-1181	protein_coding	intronic,5upstream	31636031	rs3117578	G	A	A	36749	0.900128	0.0417064	0.0116412	NA
CAD	DM	6	CSNK2B	protein_coding	intronic,3downstream,non-coding intronic	31636031	rs3117578	G	A	A	36749	0.900128	0.0417064	0.0116412	NA
CAD	Overall	6	CSNK2B-LY6G5B-1181	protein_coding	5upstream,intronic	31636742	rs9267531	G	A	G	381974	0.956987	0.0192715	0.0225268	NA
CAD	Overall	6	CSNK2B	protein_coding	3downstream,non-coding intronic,non-coding,intronic	31636742	rs9267531	G	A	G	381974	0.956987	0.0192715	0.0225268	NA
CAD	noDM	6	CSNK2B-LY6G5B-1181	protein_coding	5upstream,intronic	31636742	rs9267531	G	A	G	345225	0.954919	0.0217904	0.0342674	NA
CAD	noDM	6	CSNK2B	protein_coding	3downstream,non-coding intronic,non-coding,intronic	31636742	rs9267531	G	A	G	345225	0.954919	0.0217904	0.0342674	NA
CAD	DM	6	CSNK2B-LY6G5B-1181	protein_coding	5upstream,intronic	31636742	rs9267531	G	A	G	36749	0.964734	0.0411926	0.383436	NA
CAD	DM	6	CSNK2B	protein_coding	3downstream,non-coding intronic,non-coding,intronic	31636742	rs9267531	G	A	G	36749	0.964734	0.0411926	0.383436	NA
CAD	Overall	6	CSNK2B-LY6G5B-1181	protein_coding	intronic	31637734	rs5872	T	A	T	381974	1.03866	0.0143051	0.00801817	NA
CAD	Overall	6	CSNK2B	protein_coding	3downstream,non-coding,3utr	31637734	rs5872	T	A	T	381974	1.03866	0.0143051	0.00801817	NA
CAD	noDM	6	CSNK2B-LY6G5B-1181	protein_coding	intronic	31637734	rs5872	T	A	T	345225	1.03602	0.0160883	0.0278589	NA
CAD	noDM	6	CSNK2B	protein_coding	3downstream,non-coding,3utr	31637734	rs5872	T	A	T	345225	1.03602	0.0160883	0.0278589	NA
CAD	DM	6	CSNK2B-LY6G5B-1181	protein_coding	intronic	31637734	rs5872	T	A	T	36749	1.04763	0.0311749	0.135524	NA
CAD	DM	6	CSNK2B	protein_coding	3downstream,non-coding,3utr	31637734	rs5872	T	A	T	36749	1.04763	0.0311749	0.135524	NA
CAD	Overall	6	CSNK2B	protein_coding	3downstream,3utr,non-coding	31637807	rs4569	T	C	T	381974	1.0086	0.015151	0.572074	NA
CAD	Overall	6	CSNK2B-LY6G5B-1181	protein_coding	intronic	31637807	rs4569	T	C	T	381974	1.0086	0.015151	0.572074	NA
CAD	noDM	6	CSNK2B	protein_coding	3downstream,3utr,non-coding	31637807	rs4569	T	C	T	345225	0.991961	0.0170752	0.636417	NA
CAD	noDM	6	CSNK2B-LY6G5B-1181	protein_coding	intronic	31637807	rs4569	T	C	T	345225	0.991961	0.0170752	0.636417	NA
CAD	DM	6	CSNK2B	protein_coding	3downstream,3utr,non-coding	31637807	rs4569	T	C	T	36749	1.07205	0.0328528	0.034206	NA
CAD	DM	6	CSNK2B-LY6G5B-1181	protein_coding	intronic	31637807	rs4569	T	C	T	36749	1.07205	0.0328528	0.034206	NA
CAD	Overall	6	CLIC1	protein_coding	intronic	31699573	rs17201046	A	G	A	381974	1.04794	0.0408668	0.251898	NA
CAD	noDM	6	CLIC1	protein_coding	intronic	31699573	rs17201046	A	G	A	345225	1.05824	0.0457228	0.215683	NA
CAD	DM	6	CLIC1	protein_coding	intronic	31699573	rs17201046	A	G	A	36749	1.0097	0.0906273	0.915207	NA
CAD	Overall	6	CLIC1	protein_coding	5upstream,intronic	31706852	rs396369	T	A	A	381974	0.995616	0.0146812	0.764727	NA
CAD	noDM	6	CLIC1	protein_coding	5upstream,intronic	31706852	rs396369	T	A	A	345225	1.00221	0.0164238	0.892979	NA
CAD	DM	6	CLIC1	protein_coding	5upstream,intronic	31706852	rs396369	T	A	A	36749	0.968626	0.0326556	0.32899	NA
CAD	Overall	6	VARS	protein_coding	3downstream,intronic,non-coding intronic	31745464	rs3130491	A	G	A	381974	0.955878	0.019632	0.0215314	NA
CAD	noDM	6	VARS	protein_coding	3downstream,intronic,non-coding intronic	31745464	rs3130491	A	G	A	345225	0.95553	0.0221857	0.0403274	NA
CAD	DM	6	VARS	protein_coding	3downstream,intronic,non-coding intronic	31745464	rs3130491	A	G	A	36749	0.957718	0.0420364	0.304078	NA
CAD	Overall	6	VARS	protein_coding	non-coding intronic,5upstream,intronic	31754008	rs140091914	A	G	A	381974	1.02089	0.0202448	0.307223	NA
CAD	noDM	6	VARS	protein_coding	non-coding intronic,5upstream,intronic	31754008	rs140091914	A	G	A	345225	1.02264	0.0227236	0.324477	NA
CAD	DM	6	VARS	protein_coding	non-coding intronic,5upstream,intronic	31754008	rs140091914	A	G	A	36749	1.01235	0.0444221	0.782324	NA
CAD	Overall	6	VARS	protein_coding	intronic,5upstream	31761152	rs142045354	A	G	A	381974	1.07999	0.0517058	0.136681	NA
CAD	noDM	6	VARS	protein_coding	intronic,5upstream	31761152	rs142045354	A	G	A	345225	1.10727	0.0567292	0.0724662	NA
CAD	DM	6	VARS	protein_coding	intronic,5upstream	31761152	rs142045354	A	G	A	36749	0.957436	0.124447	0.726701	NA
CAD	Overall	6	VARS	protein_coding	intronic,coding nonsyn|nonsyn,coding *nonsyn|nonsyn	31762843	rs2607015	C	G	C	381974	1.02482	0.0131631	0.0624952	NA
CAD	noDM	6	VARS	protein_coding	intronic,coding nonsyn|nonsyn,coding *nonsyn|nonsyn	31762843	rs2607015	C	G	C	345225	1.02969	0.0147956	0.0479526	NA
CAD	DM	6	VARS	protein_coding	intronic,coding nonsyn|nonsyn,coding *nonsyn|nonsyn	31762843	rs2607015	C	G	C	36749	1.00839	0.0287563	0.771356	NA
CAD	Overall	6	HSPA1L	protein_coding	intronic	31782544	rs34416404	A	C	A	381974	0.987733	0.0407882	0.762183	NA
CAD	noDM	6	HSPA1L	protein_coding	intronic	31782544	rs34416404	A	C	A	345225	0.980997	0.0458082	0.67534	NA
CAD	DM	6	HSPA1L	protein_coding	intronic	31782544	rs34416404	A	C	A	36749	1.00741	0.0895749	0.934294	NA
CAD	Overall	6	HSPA1A	protein_coding	intronic,coding syn|nonsyn	31783755	rs1043620	C	T	T	381974	0.952831	0.0185447	0.00917457	NA
CAD	noDM	6	HSPA1A	protein_coding	intronic,coding syn|nonsyn	31783755	rs1043620	C	T	T	345225	0.97102	0.0206096	0.153603	NA
CAD	DM	6	HSPA1A	protein_coding	intronic,coding syn|nonsyn	31783755	rs1043620	C	T	T	36749	0.880743	0.0423085	0.00268637	NA
CAD	Overall	6	FKBPL	protein_coding	coding nonsyn	32097290	rs28732176	T	C	T	381974	1.02337	0.0211155	0.273878	NA
CAD	noDM	6	FKBPL	protein_coding	coding nonsyn	32097290	rs28732176	T	C	T	345225	1.00301	0.0239089	0.899896	NA
CAD	DM	6	FKBPL	protein_coding	coding nonsyn	32097290	rs28732176	T	C	T	36749	1.10069	0.0450955	0.0333907	NA
CAD	Overall	6	RNF5	protein_coding	non-coding intronic,intronic	32146657	rs9469089	C	G	C	381974	1.03018	0.0176918	0.0927958	NA
CAD	noDM	6	RNF5	protein_coding	non-coding intronic,intronic	32146657	rs9469089	C	G	C	345225	1.01351	0.0199818	0.501788	NA
CAD	DM	6	RNF5	protein_coding	non-coding intronic,intronic	32146657	rs9469089	C	G	C	36749	1.09399	0.0380583	0.0182612	NA
CAD	Overall	6	RNF5	protein_coding	intronic,3downstream	32147761	rs3134943	C	T	T	381974	0.961561	0.0183739	0.0328993	NA
CAD	noDM	6	RNF5	protein_coding	intronic,3downstream	32147761	rs3134943	C	T	T	345225	0.980875	0.0204506	0.345042	NA
CAD	DM	6	RNF5	protein_coding	intronic,3downstream	32147761	rs3134943	C	T	T	36749	0.886731	0.0416668	0.00391265	NA
CAD	Overall	6	RNF5	protein_coding	3downstream,coding syn,intronic	32148031	rs1062070	G	A	G	381974	0.977598	0.0162991	0.164507	NA
CAD	noDM	6	RNF5	protein_coding	3downstream,coding syn,intronic	32148031	rs1062070	G	A	G	345225	0.964321	0.0184576	0.0490284	NA
CAD	DM	6	RNF5	protein_coding	3downstream,coding syn,intronic	32148031	rs1062070	G	A	G	36749	1.02596	0.0347199	0.460344	NA
CAD	Overall	6	AGER	protein_coding	intronic,5upstream,non-coding intronic	32151222	rs1035798	A	G	A	381974	1.02792	0.0161613	0.0883742	NA
CAD	Overall	6	RNF5	protein_coding	3utr	32151222	rs1035798	A	G	A	381974	1.02792	0.0161613	0.0883742	NA
CAD	noDM	6	AGER	protein_coding	intronic,5upstream,non-coding intronic	32151222	rs1035798	A	G	A	345225	1.03385	0.0181528	0.0666553	NA
CAD	noDM	6	RNF5	protein_coding	3utr	32151222	rs1035798	A	G	A	345225	1.03385	0.0181528	0.0666553	NA
CAD	DM	6	AGER	protein_coding	intronic,5upstream,non-coding intronic	32151222	rs1035798	A	G	A	36749	1.00567	0.0353545	0.872859	NA
CAD	DM	6	RNF5	protein_coding	3utr	32151222	rs1035798	A	G	A	36749	1.00567	0.0353545	0.872859	NA
CAD	Overall	6	AGER	protein_coding	5utr,coding syn|syn,5upstream,coding *syn|syn,non-coding	32151420	rs35795092	C	G	C	381974	1.01802	0.0277445	0.519851	NA
CAD	Overall	6	RNF5	protein_coding	3utr	32151420	rs35795092	C	G	C	381974	1.01802	0.0277445	0.519851	NA
CAD	noDM	6	AGER	protein_coding	5utr,coding syn|syn,5upstream,coding *syn|syn,non-coding	32151420	rs35795092	C	G	C	345225	1.01752	0.0310697	0.576258	NA
CAD	noDM	6	RNF5	protein_coding	3utr	32151420	rs35795092	C	G	C	345225	1.01752	0.0310697	0.576258	NA
CAD	DM	6	AGER	protein_coding	5utr,coding syn|syn,5upstream,coding *syn|syn,non-coding	32151420	rs35795092	C	G	C	36749	1.02179	0.0615221	0.726082	NA
CAD	DM	6	RNF5	protein_coding	3utr	32151420	rs35795092	C	G	C	36749	1.02179	0.0615221	0.726082	NA
CAD	Overall	6	HLA-DQA1	protein_coding	intronic	32596878	rs114786106	G	A	G	381974	1.00545	0.0335172	0.871202	NA
CAD	noDM	6	HLA-DQA1	protein_coding	intronic	32596878	rs114786106	G	A	G	345225	0.999523	0.0376868	0.989893	NA
CAD	DM	6	HLA-DQA1	protein_coding	intronic	32596878	rs114786106	G	A	G	36749	1.02877	0.0732085	0.698467	NA
CAD	Overall	6	HLA-DQA1	protein_coding	intronic	32597064	rs3129770	A	G	G	381974	0.973805	0.0132523	0.0451763	NA
CAD	noDM	6	HLA-DQA1	protein_coding	intronic	32597064	rs3129770	A	G	G	345225	0.977742	0.0148802	0.13035	NA
CAD	DM	6	HLA-DQA1	protein_coding	intronic	32597064	rs3129770	A	G	G	36749	0.958976	0.0290668	0.149548	NA
CAD	Overall	6	HLA-DQA1	protein_coding	intronic	32597088	rs13211653	G	A	G	381974	0.973249	0.0184982	0.142689	NA
CAD	noDM	6	HLA-DQA1	protein_coding	intronic	32597088	rs13211653	G	A	G	345225	0.972253	0.0207626	0.175333	NA
CAD	DM	6	HLA-DQA1	protein_coding	intronic	32597088	rs13211653	G	A	G	36749	0.977964	0.0406306	0.583412	NA
CAD	Overall	6	HLA-DQA1	protein_coding	intronic	32597801	rs9271997	A	G	A	381974	0.976204	0.0140378	0.086236	NA
CAD	noDM	6	HLA-DQA1	protein_coding	intronic	32597801	rs9271997	A	G	A	345225	0.973138	0.0157891	0.0846086	NA
CAD	DM	6	HLA-DQA1	protein_coding	intronic	32597801	rs9271997	A	G	A	36749	0.988673	0.0305868	0.709561	NA
CAD	Overall	6	HLA-DQA1	protein_coding	intronic	32599071	rs9272050	A	G	G	381974	1.03361	0.0133009	0.0129415	NA
CAD	noDM	6	HLA-DQA1	protein_coding	intronic	32599071	rs9272050	A	G	G	345225	1.03492	0.0149348	0.0215341	NA
CAD	DM	6	HLA-DQA1	protein_coding	intronic	32599071	rs9272050	A	G	G	36749	1.02702	0.0291508	0.360485	NA
CAD	Overall	6	HLA-DQA1	protein_coding	intronic	32602308	rs183736834	C	T	C	381974	0.998352	0.0339168	0.961206	NA
CAD	noDM	6	HLA-DQA1	protein_coding	intronic	32602308	rs183736834	C	T	C	345225	0.996767	0.0380727	0.932227	NA
CAD	DM	6	HLA-DQA1	protein_coding	intronic	32602308	rs183736834	C	T	C	36749	1.00468	0.0744858	0.950017	NA
CAD	Overall	6	HLA-DQA1	protein_coding	intronic	32602665	rs139299944	CT	C	CT	381974	0.988881	0.013734	0.415576	NA
CAD	noDM	6	HLA-DQA1	protein_coding	intronic	32602665	rs139299944	CT	C	CT	345225	0.988922	0.0154282	0.470253	NA
CAD	DM	6	HLA-DQA1	protein_coding	intronic	32602665	rs139299944	CT	C	CT	36749	0.988823	0.0300513	0.708389	NA
CAD	Overall	6	HLA-DQA1	protein_coding	intronic	32602698	rs2040410	T	C	T	381974	0.966594	0.0184288	0.0652304	NA
CAD	noDM	6	HLA-DQA1	protein_coding	intronic	32602698	rs2040410	T	C	T	345225	0.959527	0.0208686	0.0477337	NA
CAD	DM	6	HLA-DQA1	protein_coding	intronic	32602698	rs2040410	T	C	T	36749	0.993172	0.0392223	0.861332	NA
CAD	Overall	6	HLA-DQA1	protein_coding	5upstream,intronic	32603660	rs1391373	C	T	C	381974	1.0323	0.0134484	0.0180736	NA
CAD	noDM	6	HLA-DQA1	protein_coding	5upstream,intronic	32603660	rs1391373	C	T	C	345225	1.02917	0.0151458	0.0576064	NA
CAD	DM	6	HLA-DQA1	protein_coding	5upstream,intronic	32603660	rs1391373	C	T	C	36749	1.0438	0.0291693	0.141644	NA
CAD	Overall	6	HLA-DQA1	protein_coding	5upstream,intronic	32603936	rs9272309	G	A	G	381974	0.98294	0.0134943	0.202245	NA
CAD	noDM	6	HLA-DQA1	protein_coding	5upstream,intronic	32603936	rs9272309	G	A	G	345225	0.983471	0.0151741	0.272042	NA
CAD	DM	6	HLA-DQA1	protein_coding	5upstream,intronic	32603936	rs9272309	G	A	G	36749	0.981591	0.0294294	0.527811	NA
CAD	Overall	6	HLA-DQA1	protein_coding	intronic,5upstream	32604221	rs6910310	G	A	G	381974	0.968305	0.0185528	0.0825626	NA
CAD	noDM	6	HLA-DQA1	protein_coding	intronic,5upstream	32604221	rs6910310	G	A	G	345225	0.961692	0.0210015	0.0629	NA
CAD	DM	6	HLA-DQA1	protein_coding	intronic,5upstream	32604221	rs6910310	G	A	G	36749	0.99329	0.0395331	0.864767	NA
CAD	Overall	6	HLA-DQA1	protein_coding	5upstream,intronic	32604743	rs6938008	C	T	C	381974	1.03594	0.0131061	0.00705123	NA
CAD	noDM	6	HLA-DQA1	protein_coding	5upstream,intronic	32604743	rs6938008	C	T	C	345225	1.03634	0.0147212	0.0153298	NA
CAD	DM	6	HLA-DQA1	protein_coding	5upstream,intronic	32604743	rs6938008	C	T	C	36749	1.03324	0.0287106	0.254721	NA
CAD	Overall	6	HLA-DQA1	protein_coding	intronic,5upstream	32605078	rs9272417	G	A	G	381974	1.05112	0.0158498	0.00165791	NA
CAD	noDM	6	HLA-DQA1	protein_coding	intronic,5upstream	32605078	rs9272417	G	A	G	345225	1.0488	0.0178908	0.00774034	NA
CAD	DM	6	HLA-DQA1	protein_coding	intronic,5upstream	32605078	rs9272417	G	A	G	36749	1.05781	0.0340873	0.0991959	NA
CAD	Overall	6	HLA-DQA1	protein_coding	3downstream,non-coding intronic,intronic	32605699	rs111541957	A	G	A	381974	0.988435	0.0204052	0.568635	NA
CAD	noDM	6	HLA-DQA1	protein_coding	3downstream,non-coding intronic,intronic	32605699	rs111541957	A	G	A	345225	0.992779	0.022876	0.751383	NA
CAD	DM	6	HLA-DQA1	protein_coding	3downstream,non-coding intronic,intronic	32605699	rs111541957	A	G	A	36749	0.973528	0.0449795	0.55086	NA
CAD	Overall	6	HLA-DQA1	protein_coding	intronic,3downstream,non-coding intronic	32605935	rs2395227	T	G	T	381974	0.969039	0.0184234	0.0878065	NA
CAD	noDM	6	HLA-DQA1	protein_coding	intronic,3downstream,non-coding intronic	32605935	rs2395227	T	G	T	345225	0.962078	0.020861	0.0638562	NA
CAD	DM	6	HLA-DQA1	protein_coding	intronic,3downstream,non-coding intronic	32605935	rs2395227	T	G	T	36749	0.995301	0.0392196	0.904402	NA
CAD	Overall	6	HLA-DQA1	protein_coding	3downstream,intronic,non-coding intronic	32606444	rs4530904	A	G	G	381974	0.987105	0.018321	0.478684	NA
CAD	noDM	6	HLA-DQA1	protein_coding	3downstream,intronic,non-coding intronic	32606444	rs4530904	A	G	G	345225	0.999198	0.0204625	0.968729	NA
CAD	DM	6	HLA-DQA1	protein_coding	3downstream,intronic,non-coding intronic	32606444	rs4530904	A	G	G	36749	0.94054	0.0409857	0.134741	NA
CAD	Overall	6	HLA-DQA1	protein_coding	3downstream,3utr,intronic,non-coding intronic	32606819	rs9272539	A	G	A	381974	1.01752	0.0130423	0.182948	NA
CAD	noDM	6	HLA-DQA1	protein_coding	3downstream,3utr,intronic,non-coding intronic	32606819	rs9272539	A	G	A	345225	1.01265	0.0147034	0.392434	NA
CAD	DM	6	HLA-DQA1	protein_coding	3downstream,3utr,intronic,non-coding intronic	32606819	rs9272539	A	G	A	36749	1.0346	0.0281962	0.227622	NA
CAD	Overall	6	HLA-DQA1	protein_coding	3downstream,3utr,intronic,non-coding intronic	32607019	rs28802989	G	C	G	381974	0.973774	0.0181718	0.143604	NA
CAD	noDM	6	HLA-DQA1	protein_coding	3downstream,3utr,intronic,non-coding intronic	32607019	rs28802989	G	C	G	345225	0.971897	0.0204094	0.162516	NA
CAD	DM	6	HLA-DQA1	protein_coding	3downstream,3utr,intronic,non-coding intronic	32607019	rs28802989	G	C	G	36749	0.982099	0.0398229	0.650125	NA
CAD	Overall	6	HLA-DQA1	protein_coding	3downstream,3utr,intronic,non-coding intronic	32607174	rs28383372	T	C	T	381974	1.04554	0.0134044	0.000893289	NA
CAD	noDM	6	HLA-DQA1	protein_coding	3downstream,3utr,intronic,non-coding intronic	32607174	rs28383372	T	C	T	345225	1.04364	0.015068	0.00458971	NA
CAD	DM	6	HLA-DQA1	protein_coding	3downstream,3utr,intronic,non-coding intronic	32607174	rs28383372	T	C	T	36749	1.0516	0.0292751	0.0856913	NA
CAD	Overall	6	HLA-DQA1	protein_coding	intronic,non-coding intronic,3downstream,3utr	32607254	rs7763805	A	G	A	381974	0.96656	0.0184563	0.0653521	NA
CAD	noDM	6	HLA-DQA1	protein_coding	intronic,non-coding intronic,3downstream,3utr	32607254	rs7763805	A	G	A	345225	0.958845	0.0208997	0.044344	NA
CAD	DM	6	HLA-DQA1	protein_coding	intronic,non-coding intronic,3downstream,3utr	32607254	rs7763805	A	G	A	36749	0.995634	0.0392825	0.911307	NA
CAD	Overall	6	HLA-DQA1	protein_coding	3utr,intronic,non-coding intronic	32607516	rs9272588	C	T	C	381974	1.01789	0.0130939	0.175702	NA
CAD	noDM	6	HLA-DQA1	protein_coding	3utr,intronic,non-coding intronic	32607516	rs9272588	C	T	C	345225	1.01263	0.0147602	0.395057	NA
CAD	DM	6	HLA-DQA1	protein_coding	3utr,intronic,non-coding intronic	32607516	rs9272588	C	T	C	36749	1.03639	0.0283243	0.206943	NA
CAD	Overall	6	HLA-DQA1	protein_coding	coding *nonsyn,3utr,non-coding,coding nonsyn	32609147	rs12722051	T	A	T	381974	1.00228	0.0161535	0.888022	NA
CAD	noDM	6	HLA-DQA1	protein_coding	coding *nonsyn,3utr,non-coding,coding nonsyn	32609147	rs12722051	T	A	T	345225	1.00356	0.0181556	0.844991	NA
CAD	DM	6	HLA-DQA1	protein_coding	coding *nonsyn,3utr,non-coding,coding nonsyn	32609147	rs12722051	T	A	T	36749	0.998115	0.0353185	0.95739	NA
CAD	Overall	6	HLA-DQA1	protein_coding	non-coding intronic,intronic	32609594	rs9272729	A	G	A	381974	0.969557	0.0183354	0.0917653	NA
CAD	noDM	6	HLA-DQA1	protein_coding	non-coding intronic,intronic	32609594	rs9272729	A	G	A	345225	0.962186	0.0207614	0.0633577	NA
CAD	DM	6	HLA-DQA1	protein_coding	non-coding intronic,intronic	32609594	rs9272729	A	G	A	36749	0.997384	0.0390311	0.946499	NA
CAD	Overall	6	HLA-DQA1	protein_coding	non-coding,3utr,intronic,coding syn	32610436	rs1048372	C	T	T	381974	0.991546	0.0133106	0.523568	NA
CAD	noDM	6	HLA-DQA1	protein_coding	non-coding,3utr,intronic,coding syn	32610436	rs1048372	C	T	T	345225	0.997325	0.0149772	0.858069	NA
CAD	DM	6	HLA-DQA1	protein_coding	non-coding,3utr,intronic,coding syn	32610436	rs1048372	C	T	T	36749	0.970852	0.0289857	0.307466	NA
CAD	Overall	6	PSMB9	protein_coding	intronic	32814975	rs1135216	C	T	C	381974	0.975213	0.0194788	0.197557	NA
CAD	Overall	6	TAP1	protein_coding	coding nonsyn,non-coding	32814975	rs1135216	C	T	C	381974	0.975213	0.0194788	0.197557	NA
CAD	noDM	6	PSMB9	protein_coding	intronic	32814975	rs1135216	C	T	C	345225	0.978221	0.0218546	0.313679	NA
CAD	noDM	6	TAP1	protein_coding	coding nonsyn,non-coding	32814975	rs1135216	C	T	C	345225	0.978221	0.0218546	0.313679	NA
CAD	DM	6	PSMB9	protein_coding	intronic	32814975	rs1135216	C	T	C	36749	0.959659	0.0428406	0.336465	NA
CAD	DM	6	TAP1	protein_coding	coding nonsyn,non-coding	32814975	rs1135216	C	T	C	36749	0.959659	0.0428406	0.336465	NA
CAD	Overall	6	PSMB9	protein_coding	intronic	32818678	rs2071538	A	G	A	381974	0.992165	0.0156265	0.614707	NA
CAD	Overall	6	TAP1	protein_coding	intronic,5upstream	32818678	rs2071538	A	G	A	381974	0.992165	0.0156265	0.614707	NA
CAD	noDM	6	PSMB9	protein_coding	intronic	32818678	rs2071538	A	G	A	345225	1.00271	0.0175023	0.877119	NA
CAD	noDM	6	TAP1	protein_coding	intronic,5upstream	32818678	rs2071538	A	G	A	345225	1.00271	0.0175023	0.877119	NA
CAD	DM	6	PSMB9	protein_coding	intronic	32818678	rs2071538	A	G	A	36749	0.954732	0.0345515	0.180007	NA
CAD	DM	6	TAP1	protein_coding	intronic,5upstream	32818678	rs2071538	A	G	A	36749	0.954732	0.0345515	0.180007	NA
CAD	Overall	6	VEGFA	protein_coding	3downstream,3utr,non-coding	43753325	rs3025053	A	G	A	381974	0.967404	0.0204277	0.104749	NA
CAD	noDM	6	VEGFA	protein_coding	3downstream,3utr,non-coding	43753325	rs3025053	A	G	A	345225	0.956531	0.0230251	0.05359	NA
CAD	DM	6	VEGFA	protein_coding	3downstream,3utr,non-coding	43753325	rs3025053	A	G	A	36749	1.00758	0.0442808	0.864571	NA
CAD	Overall	6	PRSS35	protein_coding	intronic	84226380	rs769572661	T	TAAAAC	TAAAAC	381974	0.985495	0.0131432	0.266266	NA
CAD	noDM	6	PRSS35	protein_coding	intronic	84226380	rs769572661	T	TAAAAC	TAAAAC	345225	0.988347	0.0147636	0.427246	NA
CAD	DM	6	PRSS35	protein_coding	intronic	84226380	rs769572661	T	TAAAAC	TAAAAC	36749	0.974925	0.0287674	0.377368	NA
CAD	Overall	6	PRSS35	protein_coding	intronic	84229623	rs1171115	T	C	C	381974	0.978127	0.0145512	0.12854	NA
CAD	noDM	6	PRSS35	protein_coding	intronic	84229623	rs1171115	T	C	C	345225	0.982496	0.0163285	0.279485	NA
CAD	DM	6	PRSS35	protein_coding	intronic	84229623	rs1171115	T	C	C	36749	0.961619	0.031963	0.220784	NA
CAD	Overall	6	FOXO3	protein_coding	intronic	108952337	rs4946930	A	G	A	381974	0.976429	0.0180752	0.186938	NA
CAD	noDM	6	FOXO3	protein_coding	intronic	108952337	rs4946930	A	G	A	345225	0.981593	0.0202567	0.359065	NA
CAD	DM	6	FOXO3	protein_coding	intronic	108952337	rs4946930	A	G	A	36749	0.954352	0.0399109	0.24173	NA
CAD	Overall	6	GJA1	protein_coding	intronic	121762233	rs35586997	C	T	C	381974	1.00189	0.0146029	0.89734	NA
CAD	noDM	6	GJA1	protein_coding	intronic	121762233	rs35586997	C	T	C	345225	1.00636	0.0163858	0.698774	NA
CAD	DM	6	GJA1	protein_coding	intronic	121762233	rs35586997	C	T	C	36749	0.984818	0.0321023	0.633677	NA
CAD	Overall	6	MED23	protein_coding	intronic	131897278	rs2781668	T	C	T	381974	1.02867	0.0172084	0.100465	NA
CAD	Overall	6	ARG1	protein_coding	5upstream,intronic,non-coding intronic	131897278	rs2781668	T	C	T	381974	1.02867	0.0172084	0.100465	NA
CAD	noDM	6	MED23	protein_coding	intronic	131897278	rs2781668	T	C	T	345225	1.03698	0.0193687	0.0607974	NA
CAD	noDM	6	ARG1	protein_coding	5upstream,intronic,non-coding intronic	131897278	rs2781668	T	C	T	345225	1.03698	0.0193687	0.0607974	NA
CAD	DM	6	MED23	protein_coding	intronic	131897278	rs2781668	T	C	T	36749	0.999136	0.0373642	0.981544	NA
CAD	DM	6	ARG1	protein_coding	5upstream,intronic,non-coding intronic	131897278	rs2781668	T	C	T	36749	0.999136	0.0373642	0.981544	NA
CAD	Overall	6	ACAT2	protein_coding	intronic,non-coding intronic	160185151	rs5015801	C	A	C	381974	1.19486	0.0491082	0.000288672	NA
CAD	noDM	6	ACAT2	protein_coding	intronic,non-coding intronic	160185151	rs5015801	C	A	C	345225	1.18053	0.055457	0.00276507	NA
CAD	DM	6	ACAT2	protein_coding	intronic,non-coding intronic	160185151	rs5015801	C	A	C	36749	1.24389	0.105762	0.0390635	NA
CAD	Overall	6	SLC22A2	protein_coding	non-coding intronic	160633223	rs150856119	A	G	A	381974	0.947902	0.042557	0.208672	NA
CAD	noDM	6	SLC22A2	protein_coding	non-coding intronic	160633223	rs150856119	A	G	A	345225	0.925634	0.048354	0.110013	NA
CAD	DM	6	SLC22A2	protein_coding	non-coding intronic	160633223	rs150856119	A	G	A	36749	1.02723	0.0898053	0.764847	NA
CAD	Overall	6	SLC22A2	protein_coding	non-coding intronic	160634047	rs3101824	T	C	T	381974	1.09721	0.0186893	6.90423e-07	NA
CAD	noDM	6	SLC22A2	protein_coding	non-coding intronic	160634047	rs3101824	T	C	T	345225	1.0998	0.0209851	5.81017e-06	NA
CAD	DM	6	SLC22A2	protein_coding	non-coding intronic	160634047	rs3101824	T	C	T	36749	1.08635	0.0409546	0.0431399	NA
CAD	Overall	6	SLC22A2	protein_coding	intronic,non-coding intronic	160662910	rs3127606	C	T	C	381974	1.34355	0.0523884	1.73038e-08	NONE
CAD	noDM	6	SLC22A2	protein_coding	intronic,non-coding intronic	160662910	rs3127606	C	T	C	345225	1.37977	0.0581709	3.13041e-08	rs180937395(1)
CAD	DM	6	SLC22A2	protein_coding	intronic,non-coding intronic	160662910	rs3127606	C	T	C	36749	1.20212	0.119357	0.122991	NA
CAD	Overall	6	SLC22A2	protein_coding	coding syn|syn,non-coding	160679400	rs624249	A	C	A	381974	0.933285	0.0132915	2.05124e-07	rs3861973(1),rs17588242(1),rs492453(1),rs639774(1),rs576075(1),rs643960(1),rs577940(1),rs615056(1),rs492315(1),rs614564(1)
CAD	noDM	6	SLC22A2	protein_coding	coding syn|syn,non-coding	160679400	rs624249	A	C	A	345225	0.926947	0.01497	4.03336e-07	rs3861973(1),rs17588242(1),rs492453(1),rs639774(1),rs576075(1),rs643960(1),rs577940(1),rs615056(1),rs492315(1),rs614564(1)
CAD	DM	6	SLC22A2	protein_coding	coding syn|syn,non-coding	160679400	rs624249	A	C	A	36749	0.958027	0.0288306	0.136939	NA
CAD	Overall	6	SLC22A2	protein_coding	intronic	160683146	rs76182445	A	G	A	381974	1.10552	0.0183086	4.27943e-08	rs1086568(1),rs4123902(1),rs3119304(1),rs3101822(1),rs56360293(1),rs148015788(1),rs3127604(1),rs3101820(1),rs590726(1),6:160630486_AT_A(1),rs605564(1),rs477674(1),6:160631546_CTGTT_C(1),rs12215128(1),rs619017(1),rs3101821(1),6:160632416_GCCTC_G(1),rs535785599(1),rs12207180(1),rs4629714(1),rs2481032(1),6:160633822_GC_G(1),6:160633824_CT_C(1),rs3101824(1),rs77166114(1),rs2619264(1),rs10945655(1),rs…
CAD	noDM	6	SLC22A2	protein_coding	intronic	160683146	rs76182445	A	G	A	345225	1.11861	0.0205237	4.72915e-08	NA
CAD	DM	6	SLC22A2	protein_coding	intronic	160683146	rs76182445	A	G	A	36749	1.05499	0.0403275	0.184352	NA
CAD	Overall	6	SLC22A2	protein_coding	intronic	160684859	rs74475987	T	A	T	381974	1.0433	0.0425415	0.319013	NA
CAD	noDM	6	SLC22A2	protein_coding	intronic	160684859	rs74475987	T	A	T	345225	1.06191	0.0475789	0.206777	NA
CAD	DM	6	SLC22A2	protein_coding	intronic	160684859	rs74475987	T	A	T	36749	0.97536	0.0944119	0.791585	NA
CAD	Overall	6	SLC22A2	protein_coding	intronic	160685047	rs77881708	A	G	A	381974	0.957753	0.0330595	0.191661	NA
CAD	noDM	6	SLC22A2	protein_coding	intronic	160685047	rs77881708	A	G	A	345225	0.928261	0.0378933	0.0494706	NA
CAD	DM	6	SLC22A2	protein_coding	intronic	160685047	rs77881708	A	G	A	36749	1.06885	0.0679351	0.327044	NA
CAD	Overall	6	SLC22A2	protein_coding	intronic	160687412	rs10080815	G	T	G	381974	1.55766	0.0389917	6.16979e-30	rs9456506(1),rs4709405(1),rs13209686(1),rs9457853(1),rs13194446(1),rs9457855(1),rs9457856(1),rs9457857(1),rs13220715(1),rs3912158(1),rs13211753(1),6:160623738_TTTACTAC_T(1)
CAD	noDM	6	SLC22A2	protein_coding	intronic	160687412	rs10080815	G	T	G	345225	1.62174	0.0430972	3.29763e-29	rs9456506(1),rs4709405(1),rs13209686(1),rs9457853(1),rs13194446(1),rs9457855(1),rs9457856(1),rs9457857(1),rs13220715(1),rs3912158(1),rs13211753(1),6:160623738_TTTACTAC_T(1)
CAD	DM	6	SLC22A2	protein_coding	intronic	160687412	rs10080815	G	T	G	36749	1.31648	0.0902994	0.00232673	NA
CAD	Overall	6	SLC22A2	protein_coding	intronic	160687893	rs75147699	C	A	C	381974	0.958985	0.0330574	0.205202	NA
CAD	noDM	6	SLC22A2	protein_coding	intronic	160687893	rs75147699	C	A	C	345225	0.931572	0.0378578	0.061161	NA
CAD	DM	6	SLC22A2	protein_coding	intronic	160687893	rs75147699	C	A	C	36749	1.06228	0.0680881	0.374857	NA
CAD	Overall	6	RP1-276N6.2	lincRNA	non-coding	160696828	rs662421	T	C	T	381974	0.995643	0.013096	0.738788	NA
CAD	Overall	6	SLC22A2	protein_coding	intronic	160696828	rs662421	T	C	T	381974	0.995643	0.013096	0.738788	NA
CAD	noDM	6	RP1-276N6.2	lincRNA	non-coding	160696828	rs662421	T	C	T	345225	1.00002	0.0147055	0.999088	NA
CAD	noDM	6	SLC22A2	protein_coding	intronic	160696828	rs662421	T	C	T	345225	1.00002	0.0147055	0.999088	NA
CAD	DM	6	RP1-276N6.2	lincRNA	non-coding	160696828	rs662421	T	C	T	36749	0.978832	0.0286941	0.45588	NA
CAD	DM	6	SLC22A2	protein_coding	intronic	160696828	rs662421	T	C	T	36749	0.978832	0.0286941	0.45588	NA
CAD	Overall	6	SLC22A2	protein_coding	intronic	160697306	rs316036	A	G	A	381974	0.935759	0.0130886	3.91714e-07	NA
CAD	noDM	6	SLC22A2	protein_coding	intronic	160697306	rs316036	A	G	A	345225	0.930926	0.0147116	1.14326e-06	NA
CAD	DM	6	SLC22A2	protein_coding	intronic	160697306	rs316036	A	G	A	36749	0.953956	0.0286011	0.0993302	NA
CAD	Overall	6	SLC22A2	protein_coding	intronic	160697762	rs533452	G	A	A	381974	0.976454	0.0138516	0.0853928	NA
CAD	noDM	6	SLC22A2	protein_coding	intronic	160697762	rs533452	G	A	A	345225	0.969893	0.0156127	0.0502284	NA
CAD	DM	6	SLC22A2	protein_coding	intronic	160697762	rs533452	G	A	A	36749	0.999933	0.0299596	0.998212	NA
CAD	Overall	6	SLC22A2	protein_coding	intronic	160698155	rs3127578	C	T	C	381974	1.10468	0.0183138	5.44227e-08	NA
CAD	noDM	6	SLC22A2	protein_coding	intronic	160698155	rs3127578	C	T	C	345225	1.11904	0.0205272	4.27158e-08	rs1086568(1),rs4123902(1),rs3119304(1),rs3101822(1),rs56360293(1),rs148015788(1),rs3127604(1),rs3101820(1),rs590726(1),6:160630486_AT_A(1),rs605564(1),rs477674(1),6:160631546_CTGTT_C(1),rs12215128(1),rs619017(1),rs3101821(1),6:160632416_GCCTC_G(1),rs535785599(1),rs12207180(1),rs4629714(1),rs2481032(1),6:160633822_GC_G(1),6:160633824_CT_C(1),rs3101824(1),rs77166114(1),rs2619264(1),rs10945655(1),rs…
CAD	DM	6	SLC22A2	protein_coding	intronic	160698155	rs3127578	C	T	C	36749	1.04969	0.0403598	0.229568	NA
CAD	Overall	6	SLC22A2	protein_coding	intronic	160698177	rs316037	G	A	G	381974	0.978389	0.0162613	0.179083	NA
CAD	noDM	6	SLC22A2	protein_coding	intronic	160698177	rs316037	G	A	G	345225	0.977131	0.0182766	0.205578	NA
CAD	DM	6	SLC22A2	protein_coding	intronic	160698177	rs316037	G	A	G	36749	0.981093	0.0355453	0.591255	NA
CAD	Overall	6	PACRG	protein_coding	non-coding intronic,intronic	163173485	rs4709648	C	G	C	381974	0.988683	0.0138064	0.409743	NA
CAD	noDM	6	PACRG	protein_coding	non-coding intronic,intronic	163173485	rs4709648	C	G	C	345225	0.991108	0.015488	0.564166	NA
CAD	DM	6	PACRG	protein_coding	non-coding intronic,intronic	163173485	rs4709648	C	G	C	36749	0.978429	0.0303855	0.472947	NA
CAD	Overall	6	PACRG	protein_coding	intronic	163331597	rs74447557	A	C	A	381974	0.973812	0.0255569	0.299106	NA
CAD	noDM	6	PACRG	protein_coding	intronic	163331597	rs74447557	A	C	A	345225	0.977773	0.0286865	0.433295	NA
CAD	DM	6	PACRG	protein_coding	intronic	163331597	rs74447557	A	C	A	36749	0.959186	0.0561108	0.457697	NA
CAD	Overall	6	PACRG	protein_coding	3downstream,3utr	163736502	rs6903758	G	A	G	381974	1.0042	0.0138526	0.762493	NA
CAD	noDM	6	PACRG	protein_coding	3downstream,3utr	163736502	rs6903758	G	A	G	345225	1.00768	0.0155714	0.623266	NA
CAD	DM	6	PACRG	protein_coding	3downstream,3utr	163736502	rs6903758	G	A	G	36749	0.991589	0.0302543	0.780098	NA
CAD	Overall	7	COX19	protein_coding	intronic	987356	rs62433091	A	G	A	381974	0.988108	0.0160723	0.456672	NA
CAD	Overall	7	ADAP1	protein_coding	5upstream,non-coding intronic,intronic	987356	rs62433091	A	G	A	381974	0.988108	0.0160723	0.456672	NA
CAD	noDM	7	COX19	protein_coding	intronic	987356	rs62433091	A	G	A	345225	0.981391	0.0181056	0.299506	NA
CAD	noDM	7	ADAP1	protein_coding	5upstream,non-coding intronic,intronic	987356	rs62433091	A	G	A	345225	0.981391	0.0181056	0.299506	NA
CAD	DM	7	COX19	protein_coding	intronic	987356	rs62433091	A	G	A	36749	1.01358	0.034867	0.698823	NA
CAD	DM	7	ADAP1	protein_coding	5upstream,non-coding intronic,intronic	987356	rs62433091	A	G	A	36749	1.01358	0.034867	0.698823	NA
CAD	Overall	7	COX19	protein_coding	intronic	990242	rs113766238	T	C	T	381974	1.02456	0.0181206	0.180547	NA
CAD	Overall	7	ADAP1	protein_coding	intronic,non-coding intronic	990242	rs113766238	T	C	T	381974	1.02456	0.0181206	0.180547	NA
CAD	noDM	7	COX19	protein_coding	intronic	990242	rs113766238	T	C	T	345225	1.03486	0.0202836	0.0911233	NA
CAD	noDM	7	ADAP1	protein_coding	intronic,non-coding intronic	990242	rs113766238	T	C	T	345225	1.03486	0.0202836	0.0911233	NA
CAD	DM	7	COX19	protein_coding	intronic	990242	rs113766238	T	C	T	36749	0.983508	0.040172	0.678903	NA
CAD	DM	7	ADAP1	protein_coding	intronic,non-coding intronic	990242	rs113766238	T	C	T	36749	0.983508	0.040172	0.678903	NA
CAD	Overall	7	COX19	protein_coding	intronic	1001545	rs79928190	T	C	T	381974	1.02239	0.0291458	0.447384	NA
CAD	noDM	7	COX19	protein_coding	intronic	1001545	rs79928190	T	C	T	345225	1.03977	0.0326184	0.231838	NA
CAD	DM	7	COX19	protein_coding	intronic	1001545	rs79928190	T	C	T	36749	0.95961	0.064524	0.522843	NA
CAD	Overall	7	GPER1	protein_coding	5upstream,intronic	1125893	rs3808350	G	A	G	381974	0.989605	0.0133419	0.433528	NA
CAD	Overall	7	C7orf50	protein_coding	non-coding intronic,intronic	1125893	rs3808350	G	A	G	381974	0.989605	0.0133419	0.433528	NA
CAD	noDM	7	GPER1	protein_coding	5upstream,intronic	1125893	rs3808350	G	A	G	345225	0.984165	0.0150127	0.287678	NA
CAD	noDM	7	C7orf50	protein_coding	non-coding intronic,intronic	1125893	rs3808350	G	A	G	345225	0.984165	0.0150127	0.287678	NA
CAD	DM	7	GPER1	protein_coding	5upstream,intronic	1125893	rs3808350	G	A	G	36749	1.01087	0.0290348	0.709552	NA
CAD	DM	7	C7orf50	protein_coding	non-coding intronic,intronic	1125893	rs3808350	G	A	G	36749	1.01087	0.0290348	0.709552	NA
CAD	Overall	7	C7orf50	protein_coding	intronic,non-coding intronic	1128011	rs56208327	C	G	C	381974	0.935034	0.0389499	0.0846004	NA
CAD	Overall	7	GPER1	protein_coding	intronic	1128011	rs56208327	C	G	C	381974	0.935034	0.0389499	0.0846004	NA
CAD	noDM	7	C7orf50	protein_coding	intronic,non-coding intronic	1128011	rs56208327	C	G	C	345225	0.933866	0.0438517	0.118684	NA
CAD	noDM	7	GPER1	protein_coding	intronic	1128011	rs56208327	C	G	C	345225	0.933866	0.0438517	0.118684	NA
CAD	DM	7	C7orf50	protein_coding	intronic,non-coding intronic	1128011	rs56208327	C	G	C	36749	0.941786	0.0846086	0.478396	NA
CAD	DM	7	GPER1	protein_coding	intronic	1128011	rs56208327	C	G	C	36749	0.941786	0.0846086	0.478396	NA
CAD	Overall	7	ACTB	protein_coding	intronic	5574239	rs852388	C	G	C	381974	1.01843	0.0159292	0.2516	NA
CAD	noDM	7	ACTB	protein_coding	intronic	5574239	rs852388	C	G	C	345225	1.00683	0.0179533	0.704758	NA
CAD	DM	7	ACTB	protein_coding	intronic	5574239	rs852388	C	G	C	36749	1.06241	0.0345179	0.0794723	NA
CAD	Overall	7	HIBADH	protein_coding	intronic	27566315	rs12700814	A	T	T	381974	1.01709	0.0130807	0.195268	NA
CAD	noDM	7	HIBADH	protein_coding	intronic	27566315	rs12700814	A	T	T	345225	1.01583	0.0147073	0.285507	NA
CAD	DM	7	HIBADH	protein_coding	intronic	27566315	rs12700814	A	T	T	36749	1.02108	0.0285489	0.464922	NA
CAD	Overall	7	SUGCT	protein_coding	intronic	40472936	rs750629636	CT	C	CT	381974	1.02722	0.0215792	0.213294	NA
CAD	noDM	7	SUGCT	protein_coding	intronic	40472936	rs750629636	CT	C	CT	345225	1.03896	0.024083	0.112505	NA
CAD	DM	7	SUGCT	protein_coding	intronic	40472936	rs750629636	CT	C	CT	36749	0.982112	0.0483527	0.708921	NA
CAD	Overall	7	GCK	protein_coding	intronic,3downstream	44191309	rs2971679	T	C	T	381974	0.982834	0.0179907	0.33583	NA
CAD	noDM	7	GCK	protein_coding	intronic,3downstream	44191309	rs2971679	T	C	T	345225	0.990694	0.0201615	0.642853	NA
CAD	DM	7	GCK	protein_coding	intronic,3downstream	44191309	rs2971679	T	C	T	36749	0.954545	0.0397207	0.241527	NA
CAD	Overall	7	GCK	protein_coding	intronic,non-coding intronic,5utr	44198764	rs150560724	T	C	T	381974	0.993216	0.055257	0.901954	NA
CAD	noDM	7	GCK	protein_coding	intronic,non-coding intronic,5utr	44198764	rs150560724	T	C	T	345225	1.01106	0.0613509	0.857708	NA
CAD	DM	7	GCK	protein_coding	intronic,non-coding intronic,5utr	44198764	rs150560724	T	C	T	36749	0.92315	0.126331	0.526755	NA
CAD	Overall	7	GCK	protein_coding	non-coding intronic,5upstream	44229320	rs35670475	A	G	A	381974	0.971721	0.025576	0.262018	NA
CAD	noDM	7	GCK	protein_coding	non-coding intronic,5upstream	44229320	rs35670475	A	G	A	345225	0.985469	0.0285938	0.608714	NA
CAD	DM	7	GCK	protein_coding	non-coding intronic,5upstream	44229320	rs35670475	A	G	A	36749	0.922927	0.0569262	0.158855	NA
CAD	Overall	7	GCK	protein_coding	non-coding intronic	44231778	rs2971669	T	C	T	381974	1.01136	0.0156705	0.471125	NA
CAD	noDM	7	GCK	protein_coding	non-coding intronic	44231778	rs2971669	T	C	T	345225	0.999643	0.0176813	0.983906	NA
CAD	DM	7	GCK	protein_coding	non-coding intronic	44231778	rs2971669	T	C	T	36749	1.05636	0.0338095	0.104871	NA
CAD	Overall	7	YKT6	protein_coding	non-coding,5utr	44240664	rs11540050	T	G	T	381974	0.961337	0.0303466	0.193828	NA
CAD	noDM	7	YKT6	protein_coding	non-coding,5utr	44240664	rs11540050	T	G	T	345225	0.985764	0.0337671	0.671113	NA
CAD	DM	7	YKT6	protein_coding	non-coding,5utr	44240664	rs11540050	T	G	T	36749	0.873568	0.068716	0.049175	NA
CAD	Overall	7	OGDH	protein_coding	intronic	44646763	rs732797	A	G	G	381974	0.961781	0.0130845	0.00289893	NA
CAD	noDM	7	OGDH	protein_coding	intronic	44646763	rs732797	A	G	G	345225	0.956754	0.0147283	0.00268552	NA
CAD	DM	7	OGDH	protein_coding	intronic	44646763	rs732797	A	G	G	36749	0.981325	0.0284399	0.507421	NA
CAD	Overall	7	ZMIZ2	protein_coding	intronic	44790807	rs55812947	C	T	C	381974	0.99155	0.0193974	0.661758	NA
CAD	noDM	7	ZMIZ2	protein_coding	intronic	44790807	rs55812947	C	T	C	345225	0.991604	0.0217755	0.698625	NA
CAD	DM	7	ZMIZ2	protein_coding	intronic	44790807	rs55812947	C	T	C	36749	0.990422	0.0425993	0.821267	NA
CAD	Overall	7	ZMIZ2	protein_coding	intronic	44792326	rs56230523	T	G	T	381974	0.991006	0.0194162	0.641719	NA
CAD	noDM	7	ZMIZ2	protein_coding	intronic	44792326	rs56230523	T	G	T	345225	0.992011	0.021787	0.712759	NA
CAD	DM	7	ZMIZ2	protein_coding	intronic	44792326	rs56230523	T	G	T	36749	0.986317	0.0427064	0.746987	NA
CAD	Overall	7	GBAS	protein_coding	non-coding intronic,intronic	56055286	rs4314612	A	C	C	381974	1.02224	0.0185012	0.234419	NA
CAD	noDM	7	GBAS	protein_coding	non-coding intronic,intronic	56055286	rs4314612	A	C	C	345225	1.02619	0.0207562	0.212948	NA
CAD	DM	7	GBAS	protein_coding	non-coding intronic,intronic	56055286	rs4314612	A	C	C	36749	1.00729	0.0406767	0.858211	NA
CAD	Overall	7	FZD9	protein_coding	3utr	72850178	rs1178947	C	T	C	381974	0.976551	0.0162197	0.143491	NA
CAD	noDM	7	FZD9	protein_coding	3utr	72850178	rs1178947	C	T	C	345225	0.980693	0.0182129	0.284412	NA
CAD	DM	7	FZD9	protein_coding	3utr	72850178	rs1178947	C	T	C	36749	0.960382	0.0355421	0.255389	NA
CAD	Overall	7	FZD9	protein_coding	3utr	72850305	rs113683726	A	G	A	381974	0.978655	0.0596233	0.717449	NA
CAD	noDM	7	FZD9	protein_coding	3utr	72850305	rs113683726	A	G	A	345225	0.972497	0.0670131	0.677296	NA
CAD	DM	7	FZD9	protein_coding	3utr	72850305	rs113683726	A	G	A	36749	1.00502	0.130536	0.969408	NA
CAD	Overall	7	DNAJC30	protein_coding	3utr	73096993	rs8891	C	T	C	381974	1.0116	0.0130268	0.375912	NA
CAD	noDM	7	DNAJC30	protein_coding	3utr	73096993	rs8891	C	T	C	345225	1.01528	0.014657	0.300709	NA
CAD	DM	7	DNAJC30	protein_coding	3utr	73096993	rs8891	C	T	C	36749	0.998347	0.0283674	0.95348	NA
CAD	Overall	7	WBSCR22	protein_coding	5upstream,non-coding intronic	73097720	rs28494095	C	G	C	381974	1.03665	0.0247347	0.145633	NA
CAD	Overall	7	DNAJC30	protein_coding	coding nonsyn	73097720	rs28494095	C	G	C	381974	1.03665	0.0247347	0.145633	NA
CAD	noDM	7	WBSCR22	protein_coding	5upstream,non-coding intronic	73097720	rs28494095	C	G	C	345225	1.0491	0.0276873	0.0833907	NA
CAD	noDM	7	DNAJC30	protein_coding	coding nonsyn	73097720	rs28494095	C	G	C	345225	1.0491	0.0276873	0.0833907	NA
CAD	DM	7	WBSCR22	protein_coding	5upstream,non-coding intronic	73097720	rs28494095	C	G	C	36749	0.990653	0.0547678	0.863851	NA
CAD	DM	7	DNAJC30	protein_coding	coding nonsyn	73097720	rs28494095	C	G	C	36749	0.990653	0.0547678	0.863851	NA
CAD	Overall	7	ELN	protein_coding	3downstream,intronic,non-coding intronic	73457701	rs28763982	A	G	A	381974	0.97699	0.0328593	0.478665	NA
CAD	noDM	7	ELN	protein_coding	3downstream,intronic,non-coding intronic	73457701	rs28763982	A	G	A	345225	0.992287	0.0367621	0.833187	NA
CAD	DM	7	ELN	protein_coding	3downstream,intronic,non-coding intronic	73457701	rs28763982	A	G	A	36749	0.919276	0.0728874	0.248181	NA
CAD	Overall	7	POR	protein_coding	intronic,non-coding intronic	75603658	rs6964550	A	G	A	381974	1.00843	0.0141299	0.552432	NA
CAD	noDM	7	POR	protein_coding	intronic,non-coding intronic	75603658	rs6964550	A	G	A	345225	1.00762	0.0158681	0.632319	NA
CAD	DM	7	POR	protein_coding	intronic,non-coding intronic	75603658	rs6964550	A	G	A	36749	1.01152	0.0309679	0.711511	NA
CAD	Overall	7	POR	protein_coding	5upstream,3downstream,intronic,non-coding intronic	75614777	rs2302429	A	G	A	381974	1.00274	0.0167428	0.870035	NA
CAD	noDM	7	POR	protein_coding	5upstream,3downstream,intronic,non-coding intronic	75614777	rs2302429	A	G	A	345225	1.00139	0.0188077	0.941106	NA
CAD	DM	7	POR	protein_coding	5upstream,3downstream,intronic,non-coding intronic	75614777	rs2302429	A	G	A	36749	1.00841	0.0366707	0.819336	NA
CAD	Overall	7	GTPBP10	protein_coding	non-coding intronic,intronic	89994834	rs6955587	A	C	A	381974	0.999498	0.0130098	0.969219	NA
CAD	noDM	7	GTPBP10	protein_coding	non-coding intronic,intronic	89994834	rs6955587	A	C	A	345225	1.0019	0.0146308	0.896845	NA
CAD	DM	7	GTPBP10	protein_coding	non-coding intronic,intronic	89994834	rs6955587	A	C	A	36749	0.991375	0.0283803	0.760188	NA
CAD	Overall	7	PON1	protein_coding	intronic	95011948	rs183906992	C	T	C	381974	0.976311	0.0325153	0.460924	NA
CAD	Overall	7	PON3	protein_coding	intronic,non-coding intronic	95011948	rs183906992	C	T	C	381974	0.976311	0.0325153	0.460924	NA
CAD	noDM	7	PON1	protein_coding	intronic	95011948	rs183906992	C	T	C	345225	0.989749	0.0363934	0.777086	NA
CAD	noDM	7	PON3	protein_coding	intronic,non-coding intronic	95011948	rs183906992	C	T	C	345225	0.989749	0.0363934	0.777086	NA
CAD	DM	7	PON1	protein_coding	intronic	95011948	rs183906992	C	T	C	36749	0.926911	0.0720213	0.291967	NA
CAD	DM	7	PON3	protein_coding	intronic,non-coding intronic	95011948	rs183906992	C	T	C	36749	0.926911	0.0720213	0.291967	NA
CAD	Overall	7	GNB2	protein_coding	5upstream,intronic,5utr	100271521	rs221789	C	T	T	381974	0.988618	0.0180693	0.526408	NA
CAD	noDM	7	GNB2	protein_coding	5upstream,intronic,5utr	100271521	rs221789	C	T	T	345225	0.982077	0.0203788	0.374819	NA
CAD	DM	7	GNB2	protein_coding	5upstream,intronic,5utr	100271521	rs221789	C	T	T	36749	1.01464	0.0390204	0.709469	NA
CAD	Overall	7	GNB2	protein_coding	5upstream,intronic,non-coding intronic	100274063	rs62482252	A	C	A	381974	1.01095	0.0151399	0.471772	NA
CAD	noDM	7	GNB2	protein_coding	5upstream,intronic,non-coding intronic	100274063	rs62482252	A	C	A	345225	1.00628	0.0170518	0.713315	NA
CAD	DM	7	GNB2	protein_coding	5upstream,intronic,non-coding intronic	100274063	rs62482252	A	C	A	36749	1.03036	0.0328542	0.362651	NA
CAD	Overall	7	PRKAR2B	protein_coding	intronic	106789152	rs975935	G	T	T	381974	0.958987	0.0163163	0.010269	NA
CAD	noDM	7	PRKAR2B	protein_coding	intronic	106789152	rs975935	G	T	T	345225	0.946282	0.0184118	0.00271002	NA
CAD	DM	7	PRKAR2B	protein_coding	intronic	106789152	rs975935	G	T	T	36749	1.00867	0.0351984	0.806213	NA
CAD	Overall	7	AKR1B10	protein_coding	intronic,non-coding intronic	134215259	rs1722886	T	A	T	381974	1.00292	0.0131029	0.824067	NA
CAD	noDM	7	AKR1B10	protein_coding	intronic,non-coding intronic	134215259	rs1722886	T	A	T	345225	0.98635	0.0147467	0.351327	NA
CAD	DM	7	AKR1B10	protein_coding	intronic,non-coding intronic	134215259	rs1722886	T	A	T	36749	1.06673	0.0285117	0.0234698	NA
CAD	Overall	7	AGBL3	protein_coding	3downstream,intronic,non-coding intronic	134681306	rs11973318	C	T	C	381974	1.02474	0.0184267	0.184666	NA
CAD	noDM	7	AGBL3	protein_coding	3downstream,intronic,non-coding intronic	134681306	rs11973318	C	T	C	345225	1.03261	0.0206707	0.120513	NA
CAD	DM	7	AGBL3	protein_coding	3downstream,intronic,non-coding intronic	134681306	rs11973318	C	T	C	36749	0.995904	0.0405179	0.919309	NA
CAD	Overall	7	TMEM176A	protein_coding	coding syn,non-coding,coding *syn,3downstream,5upstream	150500520	rs741066	T	C	T	381974	1.00533	0.0141899	0.708049	NA
CAD	noDM	7	TMEM176A	protein_coding	coding syn,non-coding,coding *syn,3downstream,5upstream	150500520	rs741066	T	C	T	345225	1.00983	0.015934	0.539391	NA
CAD	DM	7	TMEM176A	protein_coding	coding syn,non-coding,coding *syn,3downstream,5upstream	150500520	rs741066	T	C	T	36749	0.987768	0.0310963	0.692266	NA
CAD	Overall	7	TMEM176A	protein_coding	non-coding intronic,non-coding,3downstream,coding nonsyn	150501455	rs10378	T	G	T	381974	0.980291	0.016957	0.240437	NA
CAD	noDM	7	TMEM176A	protein_coding	non-coding intronic,non-coding,3downstream,coding nonsyn	150501455	rs10378	T	G	T	345225	0.98132	0.0190438	0.322085	NA
CAD	DM	7	TMEM176A	protein_coding	non-coding intronic,non-coding,3downstream,coding nonsyn	150501455	rs10378	T	G	T	36749	0.977004	0.037173	0.531412	NA
CAD	Overall	7	NOS3	protein_coding	5upstream,intronic	150690079	rs2070744	T	C	C	381974	1.00112	0.0134236	0.933667	NA
CAD	noDM	7	NOS3	protein_coding	5upstream,intronic	150690079	rs2070744	T	C	C	345225	1.00481	0.0150717	0.750437	NA
CAD	DM	7	NOS3	protein_coding	5upstream,intronic	150690079	rs2070744	T	C	C	36749	0.986964	0.0294445	0.655844	NA
CAD	Overall	7	NOS3	protein_coding	intronic,5upstream	150690176	rs3918226	T	C	T	381974	1.14457	0.0229979	4.32632e-09	rs138595199(1),rs3918225(1),rs753482(1),rs743506(1),rs743507(1)
CAD	noDM	7	NOS3	protein_coding	intronic,5upstream	150690176	rs3918226	T	C	T	345225	1.14474	0.0257415	1.50853e-07	rs138595199(1),rs3918225(1)
CAD	DM	7	NOS3	protein_coding	intronic,5upstream	150690176	rs3918226	T	C	T	36749	1.14246	0.0510492	0.00908388	NA
CAD	Overall	7	NOS3	protein_coding	intronic	150696008	rs1007311	G	A	G	381974	1.01542	0.0132225	0.247294	NA
CAD	noDM	7	NOS3	protein_coding	intronic	150696008	rs1007311	G	A	G	345225	1.01888	0.0148487	0.207842	NA
CAD	DM	7	NOS3	protein_coding	intronic	150696008	rs1007311	G	A	G	36749	1.00233	0.0289836	0.936041	NA
CAD	Overall	7	NOS3	protein_coding	intronic,5upstream	150704843	rs891511	A	G	A	381974	0.955655	0.0141721	0.00137175	NA
CAD	noDM	7	NOS3	protein_coding	intronic,5upstream	150704843	rs891511	A	G	A	345225	0.957343	0.015943	0.00625036	NA
CAD	DM	7	NOS3	protein_coding	intronic,5upstream	150704843	rs891511	A	G	A	36749	0.950203	0.0308726	0.0980168	NA
CAD	Overall	7	ABCB8	protein_coding	intronic,5upstream,3downstream	150732649	rs76884999	T	C	T	381974	1.09667	0.040159	0.0215728	NA
CAD	noDM	7	ABCB8	protein_coding	intronic,5upstream,3downstream	150732649	rs76884999	T	C	T	345225	1.08788	0.0453451	0.0632336	NA
CAD	DM	7	ABCB8	protein_coding	intronic,5upstream,3downstream	150732649	rs76884999	T	C	T	36749	1.12911	0.0864166	0.159958	NA
CAD	Overall	8	MSRA	protein_coding	intronic	9941858	rs11249970	T	C	C	381974	1.01856	0.0135945	0.176166	NA
CAD	noDM	8	MSRA	protein_coding	intronic	9941858	rs11249970	T	C	C	345225	1.01277	0.0153151	0.407382	NA
CAD	DM	8	MSRA	protein_coding	intronic	9941858	rs11249970	T	C	C	36749	1.04092	0.0294642	0.173435	NA
CAD	Overall	8	MSRA	protein_coding	non-coding intronic,intronic	9965858	rs77741956	T	G	T	381974	0.980555	0.0206398	0.341413	NA
CAD	noDM	8	MSRA	protein_coding	non-coding intronic,intronic	9965858	rs77741956	T	G	T	345225	0.976391	0.0232799	0.304756	NA
CAD	DM	8	MSRA	protein_coding	non-coding intronic,intronic	9965858	rs77741956	T	G	T	36749	0.996215	0.0445736	0.932197	NA
CAD	Overall	8	MSRA	protein_coding	non-coding intronic,intronic	9989730	rs12545469	G	C	G	381974	0.999998	0.0140286	0.999871	NA
CAD	noDM	8	MSRA	protein_coding	non-coding intronic,intronic	9989730	rs12545469	G	C	G	345225	1.00885	0.0157579	0.575858	NA
CAD	DM	8	MSRA	protein_coding	non-coding intronic,intronic	9989730	rs12545469	G	C	G	36749	0.966309	0.0307038	0.264329	NA
CAD	Overall	8	MSRA	protein_coding	non-coding intronic,intronic	10002027	rs13272793	T	C	T	381974	0.992212	0.0130862	0.550224	NA
CAD	noDM	8	MSRA	protein_coding	non-coding intronic,intronic	10002027	rs13272793	T	C	T	345225	0.99273	0.0146933	0.619501	NA
CAD	DM	8	MSRA	protein_coding	non-coding intronic,intronic	10002027	rs13272793	T	C	T	36749	0.990521	0.0287028	0.740013	NA
CAD	Overall	8	MSRA	protein_coding	non-coding intronic,intronic	10019163	rs71516557	C	A	C	381974	0.98391	0.0174822	0.353485	NA
CAD	noDM	8	MSRA	protein_coding	non-coding intronic,intronic	10019163	rs71516557	C	A	C	345225	0.996631	0.0195603	0.863018	NA
CAD	DM	8	MSRA	protein_coding	non-coding intronic,intronic	10019163	rs71516557	C	A	C	36749	0.935965	0.0387641	0.0877871	NA
CAD	Overall	8	MSRA	protein_coding	non-coding intronic,intronic	10020535	rs7007046	T	C	T	381974	0.980626	0.0169403	0.248137	NA
CAD	noDM	8	MSRA	protein_coding	non-coding intronic,intronic	10020535	rs7007046	T	C	T	345225	0.989354	0.0189717	0.572647	NA
CAD	DM	8	MSRA	protein_coding	non-coding intronic,intronic	10020535	rs7007046	T	C	T	36749	0.947071	0.0374491	0.146464	NA
CAD	Overall	8	MSRA	protein_coding	non-coding intronic,intronic	10063124	rs71516559	G	A	G	381974	1.00147	0.0331385	0.964647	NA
CAD	noDM	8	MSRA	protein_coding	non-coding intronic,intronic	10063124	rs71516559	G	A	G	345225	1.00874	0.0371937	0.814941	NA
CAD	DM	8	MSRA	protein_coding	non-coding intronic,intronic	10063124	rs71516559	G	A	G	36749	0.973245	0.0726734	0.70902	NA
CAD	Overall	8	MSRA	protein_coding	intronic,non-coding intronic	10087849	rs56198596	C	G	C	381974	0.992006	0.0137611	0.559707	NA
CAD	noDM	8	MSRA	protein_coding	intronic,non-coding intronic	10087849	rs56198596	C	G	C	345225	1.00085	0.0154605	0.955925	NA
CAD	DM	8	MSRA	protein_coding	intronic,non-coding intronic	10087849	rs56198596	C	G	C	36749	0.959121	0.0301127	0.165728	NA
CAD	Overall	8	MSRA	protein_coding	intronic,non-coding intronic	10102863	rs4841293	G	A	A	381974	1.0094	0.0144198	0.516546	NA
CAD	noDM	8	MSRA	protein_coding	intronic,non-coding intronic	10102863	rs4841293	G	A	A	345225	1.01516	0.0161728	0.352114	NA
CAD	DM	8	MSRA	protein_coding	intronic,non-coding intronic	10102863	rs4841293	G	A	A	36749	0.986979	0.0317547	0.679788	NA
CAD	Overall	8	MSRA	protein_coding	non-coding intronic,intronic	10113273	rs6995687	T	C	T	381974	1.00176	0.0224866	0.93769	NA
CAD	noDM	8	MSRA	protein_coding	non-coding intronic,intronic	10113273	rs6995687	T	C	T	345225	1.00167	0.0252368	0.947364	NA
CAD	DM	8	MSRA	protein_coding	non-coding intronic,intronic	10113273	rs6995687	T	C	T	36749	0.999518	0.049403	0.992215	NA
CAD	Overall	8	MSRA	protein_coding	intronic,non-coding intronic	10126062	rs2952183	C	T	T	381974	1.00218	0.0181221	0.904171	NA
CAD	noDM	8	MSRA	protein_coding	intronic,non-coding intronic	10126062	rs2952183	C	T	T	345225	0.991747	0.0203945	0.684505	NA
CAD	DM	8	MSRA	protein_coding	intronic,non-coding intronic	10126062	rs2952183	C	T	T	36749	1.04248	0.0394722	0.291869	NA
CAD	Overall	8	MSRA	protein_coding	intronic,non-coding intronic	10130494	rs2975662	G	C	C	381974	0.990775	0.0146876	0.528042	NA
CAD	noDM	8	MSRA	protein_coding	intronic,non-coding intronic	10130494	rs2975662	G	C	C	345225	0.986413	0.0165066	0.407235	NA
CAD	DM	8	MSRA	protein_coding	intronic,non-coding intronic	10130494	rs2975662	G	C	C	36749	1.00717	0.0321239	0.823916	NA
CAD	Overall	8	MSRA	protein_coding	non-coding intronic,intronic	10135976	rs2975648	C	T	C	381974	1.01094	0.013126	0.40708	NA
CAD	noDM	8	MSRA	protein_coding	non-coding intronic,intronic	10135976	rs2975648	C	T	C	345225	1.02029	0.0147307	0.172774	NA
CAD	DM	8	MSRA	protein_coding	non-coding intronic,intronic	10135976	rs2975648	C	T	C	36749	0.974917	0.0288353	0.378341	NA
CAD	Overall	8	MSRA	protein_coding	non-coding intronic,intronic	10152599	rs4840475	C	T	T	381974	0.997901	0.0143391	0.883488	NA
CAD	noDM	8	MSRA	protein_coding	non-coding intronic,intronic	10152599	rs4840475	C	T	T	345225	1.00529	0.0161181	0.743489	NA
CAD	DM	8	MSRA	protein_coding	non-coding intronic,intronic	10152599	rs4840475	C	T	T	36749	0.969647	0.0312902	0.324581	NA
CAD	Overall	8	MSRA	protein_coding	non-coding intronic,intronic	10184132	rs62490330	G	A	G	381974	1.00795	0.0239204	0.740577	NA
CAD	noDM	8	MSRA	protein_coding	non-coding intronic,intronic	10184132	rs62490330	G	A	G	345225	0.996204	0.027044	0.888166	NA
CAD	DM	8	MSRA	protein_coding	non-coding intronic,intronic	10184132	rs62490330	G	A	G	36749	1.0503	0.0512944	0.338675	NA
CAD	Overall	8	MSRA	protein_coding	non-coding intronic,intronic	10189730	rs77480704	A	G	A	381974	0.964327	0.0245876	0.139584	NA
CAD	noDM	8	MSRA	protein_coding	non-coding intronic,intronic	10189730	rs77480704	A	G	A	345225	0.969884	0.0276261	0.268351	NA
CAD	DM	8	MSRA	protein_coding	non-coding intronic,intronic	10189730	rs77480704	A	G	A	36749	0.94525	0.0537295	0.294666	NA
CAD	Overall	8	MSRA	protein_coding	intronic,non-coding intronic	10193772	rs6982308	G	C	C	381974	1.01091	0.0130165	0.404538	NA
CAD	noDM	8	MSRA	protein_coding	intronic,non-coding intronic	10193772	rs6982308	G	C	C	345225	1.01817	0.0146091	0.217608	NA
CAD	DM	8	MSRA	protein_coding	intronic,non-coding intronic	10193772	rs6982308	G	C	C	36749	0.982284	0.0285942	0.531888	NA
CAD	Overall	8	MSRA	protein_coding	non-coding intronic,intronic	10197718	rs7460226	G	A	G	381974	1.02489	0.0132495	0.0634847	NA
CAD	noDM	8	MSRA	protein_coding	non-coding intronic,intronic	10197718	rs7460226	G	A	G	345225	1.02828	0.014867	0.0606832	NA
CAD	DM	8	MSRA	protein_coding	non-coding intronic,intronic	10197718	rs7460226	G	A	G	36749	1.01069	0.0291319	0.714996	NA
CAD	Overall	8	MSRA	protein_coding	non-coding intronic,intronic	10198534	rs7837979	T	C	T	381974	1.02132	0.0131752	0.10928	NA
CAD	noDM	8	MSRA	protein_coding	non-coding intronic,intronic	10198534	rs7837979	T	C	T	345225	1.02605	0.0147816	0.0818697	NA
CAD	DM	8	MSRA	protein_coding	non-coding intronic,intronic	10198534	rs7837979	T	C	T	36749	1.0019	0.0289785	0.947734	NA
CAD	Overall	8	MSRA	protein_coding	non-coding intronic,intronic	10199548	rs17708276	A	G	A	381974	0.978469	0.0190543	0.253328	NA
CAD	noDM	8	MSRA	protein_coding	non-coding intronic,intronic	10199548	rs17708276	A	G	A	345225	0.965269	0.0214764	0.0997776	NA
CAD	DM	8	MSRA	protein_coding	non-coding intronic,intronic	10199548	rs17708276	A	G	A	36749	1.02929	0.0413086	0.484589	NA
CAD	Overall	8	MSRA	protein_coding	non-coding intronic,intronic	10239304	rs76813926	C	G	C	381974	0.977244	0.0286477	0.421675	NA
CAD	noDM	8	MSRA	protein_coding	non-coding intronic,intronic	10239304	rs76813926	C	G	C	345225	0.984017	0.0321859	0.616658	NA
CAD	DM	8	MSRA	protein_coding	non-coding intronic,intronic	10239304	rs76813926	C	G	C	36749	0.950655	0.0625809	0.418733	NA
CAD	Overall	8	MSRA	protein_coding	non-coding intronic,intronic	10252577	rs73197263	C	A	C	381974	0.987399	0.0187902	0.49975	NA
CAD	noDM	8	MSRA	protein_coding	non-coding intronic,intronic	10252577	rs73197263	C	A	C	345225	0.96912	0.0212159	0.139287	NA
CAD	DM	8	MSRA	protein_coding	non-coding intronic,intronic	10252577	rs73197263	C	A	C	36749	1.05922	0.0405053	0.15553	NA
CAD	Overall	8	MSRA	protein_coding	non-coding intronic,intronic	10262373	rs1962392	G	C	G	381974	0.989481	0.0144284	0.463604	NA
CAD	noDM	8	MSRA	protein_coding	non-coding intronic,intronic	10262373	rs1962392	G	C	G	345225	0.985485	0.0162194	0.367338	NA
CAD	DM	8	MSRA	protein_coding	non-coding intronic,intronic	10262373	rs1962392	G	C	G	36749	1.00646	0.0315247	0.838075	NA
CAD	Overall	8	MSRA	protein_coding	non-coding,intronic	10268736	rs1986971	G	A	G	381974	1.0018	0.0143572	0.900344	NA
CAD	noDM	8	MSRA	protein_coding	non-coding,intronic	10268736	rs1986971	G	A	G	345225	1.00476	0.0161151	0.768072	NA
CAD	DM	8	MSRA	protein_coding	non-coding,intronic	10268736	rs1986971	G	A	G	36749	0.992051	0.0315251	0.800137	NA
CAD	Overall	8	MSRA	protein_coding	intronic	10283748	rs7005363	C	T	C	381974	1.00178	0.0130327	0.891347	NA
CAD	noDM	8	MSRA	protein_coding	intronic	10283748	rs7005363	C	T	C	345225	1.00027	0.014636	0.985536	NA
CAD	DM	8	MSRA	protein_coding	intronic	10283748	rs7005363	C	T	C	36749	1.0061	0.0285619	0.831498	NA
CAD	Overall	8	CTD-2135J3.3	antisense	non-coding intronic,3downstream	10623633	rs891556	C	G	G	381974	1.01274	0.0132332	0.338846	NA
CAD	Overall	8	PINX1	protein_coding	intronic	10623633	rs891556	C	G	G	381974	1.01274	0.0132332	0.338846	NA
CAD	Overall	8	SOX7	protein_coding	intronic	10623633	rs891556	C	G	G	381974	1.01274	0.0132332	0.338846	NA
CAD	noDM	8	CTD-2135J3.3	antisense	non-coding intronic,3downstream	10623633	rs891556	C	G	G	345225	1.017	0.0148882	0.257486	NA
CAD	noDM	8	PINX1	protein_coding	intronic	10623633	rs891556	C	G	G	345225	1.017	0.0148882	0.257486	NA
CAD	noDM	8	SOX7	protein_coding	intronic	10623633	rs891556	C	G	G	345225	1.017	0.0148882	0.257486	NA
CAD	DM	8	CTD-2135J3.3	antisense	non-coding intronic,3downstream	10623633	rs891556	C	G	G	36749	0.996966	0.0287877	0.915937	NA
CAD	DM	8	PINX1	protein_coding	intronic	10623633	rs891556	C	G	G	36749	0.996966	0.0287877	0.915937	NA
CAD	DM	8	SOX7	protein_coding	intronic	10623633	rs891556	C	G	G	36749	0.996966	0.0287877	0.915937	NA
CAD	Overall	8	SOX7	protein_coding	intronic	10637552	rs7814142	A	G	G	381974	1.01023	0.0131968	0.440502	NA
CAD	Overall	8	PINX1	protein_coding	intronic	10637552	rs7814142	A	G	G	381974	1.01023	0.0131968	0.440502	NA
CAD	noDM	8	SOX7	protein_coding	intronic	10637552	rs7814142	A	G	G	345225	1.01189	0.0148478	0.426179	NA
CAD	noDM	8	PINX1	protein_coding	intronic	10637552	rs7814142	A	G	G	345225	1.01189	0.0148478	0.426179	NA
CAD	DM	8	SOX7	protein_coding	intronic	10637552	rs7814142	A	G	G	36749	1.00406	0.0287074	0.887844	NA
CAD	DM	8	PINX1	protein_coding	intronic	10637552	rs7814142	A	G	G	36749	1.00406	0.0287074	0.887844	NA
CAD	Overall	8	PINX1	protein_coding	intronic	10640065	rs1821002	G	C	C	381974	1.0098	0.0132011	0.460212	NA
CAD	Overall	8	SOX7	protein_coding	intronic	10640065	rs1821002	G	C	C	381974	1.0098	0.0132011	0.460212	NA
CAD	noDM	8	PINX1	protein_coding	intronic	10640065	rs1821002	G	C	C	345225	1.01205	0.0148533	0.419845	NA
CAD	noDM	8	SOX7	protein_coding	intronic	10640065	rs1821002	G	C	C	345225	1.01205	0.0148533	0.419845	NA
CAD	DM	8	PINX1	protein_coding	intronic	10640065	rs1821002	G	C	C	36749	1.00152	0.0287116	0.957761	NA
CAD	DM	8	SOX7	protein_coding	intronic	10640065	rs1821002	G	C	C	36749	1.00152	0.0287116	0.957761	NA
CAD	Overall	8	PINX1	protein_coding	intronic	10640359	rs10092781	T	C	T	381974	0.998964	0.0130006	0.93644	NA
CAD	Overall	8	SOX7	protein_coding	intronic	10640359	rs10092781	T	C	T	381974	0.998964	0.0130006	0.93644	NA
CAD	noDM	8	PINX1	protein_coding	intronic	10640359	rs10092781	T	C	T	345225	1.00552	0.0146087	0.706224	NA
CAD	noDM	8	SOX7	protein_coding	intronic	10640359	rs10092781	T	C	T	345225	1.00552	0.0146087	0.706224	NA
CAD	DM	8	PINX1	protein_coding	intronic	10640359	rs10092781	T	C	T	36749	0.974538	0.0284311	0.364309	NA
CAD	DM	8	SOX7	protein_coding	intronic	10640359	rs10092781	T	C	T	36749	0.974538	0.0284311	0.364309	NA
CAD	Overall	8	PINX1	protein_coding	3downstream,intronic	10643164	rs9657541	T	C	T	381974	0.980008	0.0162402	0.213677	NA
CAD	Overall	8	SOX7	protein_coding	intronic	10643164	rs9657541	T	C	T	381974	0.980008	0.0162402	0.213677	NA
CAD	noDM	8	PINX1	protein_coding	3downstream,intronic	10643164	rs9657541	T	C	T	345225	0.986091	0.0182218	0.442078	NA
CAD	noDM	8	SOX7	protein_coding	intronic	10643164	rs9657541	T	C	T	345225	0.986091	0.0182218	0.442078	NA
CAD	DM	8	PINX1	protein_coding	3downstream,intronic	10643164	rs9657541	T	C	T	36749	0.958643	0.0356898	0.236638	NA
CAD	DM	8	SOX7	protein_coding	intronic	10643164	rs9657541	T	C	T	36749	0.958643	0.0356898	0.236638	NA
CAD	Overall	8	SOX7	protein_coding	intronic	10644101	rs7821812	C	G	C	381974	0.984162	0.0161049	0.321535	NA
CAD	Overall	8	PINX1	protein_coding	3downstream,intronic	10644101	rs7821812	C	G	C	381974	0.984162	0.0161049	0.321535	NA
CAD	noDM	8	SOX7	protein_coding	intronic	10644101	rs7821812	C	G	C	345225	0.989376	0.0180712	0.55449	NA
CAD	noDM	8	PINX1	protein_coding	3downstream,intronic	10644101	rs7821812	C	G	C	345225	0.989376	0.0180712	0.55449	NA
CAD	DM	8	SOX7	protein_coding	intronic	10644101	rs7821812	C	G	C	36749	0.965674	0.0353883	0.323633	NA
CAD	DM	8	PINX1	protein_coding	3downstream,intronic	10644101	rs7821812	C	G	C	36749	0.965674	0.0353883	0.323633	NA
CAD	Overall	8	SOX7	protein_coding	intronic	10668751	rs10105487	A	T	A	381974	0.976308	0.0139381	0.085381	NA
CAD	Overall	8	PINX1	protein_coding	intronic	10668751	rs10105487	A	T	A	381974	0.976308	0.0139381	0.085381	NA
CAD	noDM	8	SOX7	protein_coding	intronic	10668751	rs10105487	A	T	A	345225	0.973011	0.0156651	0.0807126	NA
CAD	noDM	8	PINX1	protein_coding	intronic	10668751	rs10105487	A	T	A	345225	0.973011	0.0156651	0.0807126	NA
CAD	DM	8	SOX7	protein_coding	intronic	10668751	rs10105487	A	T	A	36749	0.988808	0.030462	0.711769	NA
CAD	DM	8	PINX1	protein_coding	intronic	10668751	rs10105487	A	T	A	36749	0.988808	0.030462	0.711769	NA
CAD	Overall	8	PINX1	protein_coding	intronic,non-coding intronic,5upstream	10685185	rs13274017	G	A	G	381974	0.97472	0.0134668	0.0572551	NA
CAD	Overall	8	SOX7	protein_coding	intronic	10685185	rs13274017	G	A	G	381974	0.97472	0.0134668	0.0572551	NA
CAD	noDM	8	PINX1	protein_coding	intronic,non-coding intronic,5upstream	10685185	rs13274017	G	A	G	345225	0.965765	0.0151466	0.0214592	NA
CAD	noDM	8	SOX7	protein_coding	intronic	10685185	rs13274017	G	A	G	345225	0.965765	0.0151466	0.0214592	NA
CAD	DM	8	PINX1	protein_coding	intronic,non-coding intronic,5upstream	10685185	rs13274017	G	A	G	36749	1.00953	0.0293607	0.746723	NA
CAD	DM	8	SOX7	protein_coding	intronic	10685185	rs13274017	G	A	G	36749	1.00953	0.0293607	0.746723	NA
CAD	Overall	8	PINX1	protein_coding	non-coding,intronic,5upstream,3downstream	10691088	rs112120919	AAT	A	AAT	381974	0.989718	0.0172842	0.54987	NA
CAD	Overall	8	SOX7	protein_coding	intronic	10691088	rs112120919	AAT	A	AAT	381974	0.989718	0.0172842	0.54987	NA
CAD	noDM	8	PINX1	protein_coding	non-coding,intronic,5upstream,3downstream	10691088	rs112120919	AAT	A	AAT	345225	0.982262	0.019498	0.358683	NA
CAD	noDM	8	SOX7	protein_coding	intronic	10691088	rs112120919	AAT	A	AAT	345225	0.982262	0.019498	0.358683	NA
CAD	DM	8	PINX1	protein_coding	non-coding,intronic,5upstream,3downstream	10691088	rs112120919	AAT	A	AAT	36749	1.01971	0.0372957	0.600749	NA
CAD	DM	8	SOX7	protein_coding	intronic	10691088	rs112120919	AAT	A	AAT	36749	1.01971	0.0372957	0.600749	NA
CAD	Overall	8	PINX1	protein_coding	non-coding intronic,intronic	10694671	rs10099929	T	C	T	381974	0.962786	0.0146936	0.00985262	NA
CAD	Overall	8	SOX7	protein_coding	intronic	10694671	rs10099929	T	C	T	381974	0.962786	0.0146936	0.00985262	NA
CAD	noDM	8	PINX1	protein_coding	non-coding intronic,intronic	10694671	rs10099929	T	C	T	345225	0.962865	0.0165045	0.0218584	NA
CAD	noDM	8	SOX7	protein_coding	intronic	10694671	rs10099929	T	C	T	345225	0.962865	0.0165045	0.0218584	NA
CAD	DM	8	PINX1	protein_coding	non-coding intronic,intronic	10694671	rs10099929	T	C	T	36749	0.9629	0.0321782	0.240036	NA
CAD	DM	8	SOX7	protein_coding	intronic	10694671	rs10099929	T	C	T	36749	0.9629	0.0321782	0.240036	NA
CAD	Overall	8	SOX7	protein_coding	intronic	10696360	rs61615360	T	C	T	381974	1.0444	0.030484	0.154171	NA
CAD	Overall	8	PINX1	protein_coding	non-coding intronic,intronic	10696360	rs61615360	T	C	T	381974	1.0444	0.030484	0.154171	NA
CAD	noDM	8	SOX7	protein_coding	intronic	10696360	rs61615360	T	C	T	345225	1.024	0.0345327	0.492131	NA
CAD	noDM	8	PINX1	protein_coding	non-coding intronic,intronic	10696360	rs61615360	T	C	T	345225	1.024	0.0345327	0.492131	NA
CAD	DM	8	SOX7	protein_coding	intronic	10696360	rs61615360	T	C	T	36749	1.11992	0.0650324	0.0815771	NA
CAD	DM	8	PINX1	protein_coding	non-coding intronic,intronic	10696360	rs61615360	T	C	T	36749	1.11992	0.0650324	0.0815771	NA
CAD	Overall	8	SOX7	protein_coding	intronic	10696620	rs10091386	C	A	A	381974	1.01774	0.0130853	0.179037	NA
CAD	Overall	8	PINX1	protein_coding	intronic,non-coding intronic	10696620	rs10091386	C	A	A	381974	1.01774	0.0130853	0.179037	NA
CAD	noDM	8	SOX7	protein_coding	intronic	10696620	rs10091386	C	A	A	345225	1.01869	0.0147351	0.208851	NA
CAD	noDM	8	PINX1	protein_coding	intronic,non-coding intronic	10696620	rs10091386	C	A	A	345225	1.01869	0.0147351	0.208851	NA
CAD	DM	8	SOX7	protein_coding	intronic	10696620	rs10091386	C	A	A	36749	1.01335	0.0283824	0.64037	NA
CAD	DM	8	PINX1	protein_coding	intronic,non-coding intronic	10696620	rs10091386	C	A	A	36749	1.01335	0.0283824	0.64037	NA
CAD	Overall	8	PINX1	protein_coding	intronic,non-coding intronic	10696997	rs7012199	C	A	A	381974	1.01546	0.0130957	0.241347	NA
CAD	Overall	8	SOX7	protein_coding	intronic	10696997	rs7012199	C	A	A	381974	1.01546	0.0130957	0.241347	NA
CAD	noDM	8	PINX1	protein_coding	intronic,non-coding intronic	10696997	rs7012199	C	A	A	345225	1.01725	0.0147436	0.246149	NA
CAD	noDM	8	SOX7	protein_coding	intronic	10696997	rs7012199	C	A	A	345225	1.01725	0.0147436	0.246149	NA
CAD	DM	8	PINX1	protein_coding	intronic,non-coding intronic	10696997	rs7012199	C	A	A	36749	1.00799	0.0284235	0.779424	NA
CAD	DM	8	SOX7	protein_coding	intronic	10696997	rs7012199	C	A	A	36749	1.00799	0.0284235	0.779424	NA
CAD	Overall	8	TDH	pseudogene	non-coding intronic	11199938	rs2736273	A	C	C	381974	1.00256	0.0129957	0.843755	NA
CAD	noDM	8	TDH	pseudogene	non-coding intronic	11199938	rs2736273	A	C	C	345225	1.00274	0.0146104	0.851405	NA
CAD	DM	8	TDH	pseudogene	non-coding intronic	11199938	rs2736273	A	C	C	36749	1.00364	0.0283724	0.898167	NA
CAD	Overall	8	TDH	pseudogene	non-coding intronic	11208903	rs2572385	A	G	G	381974	1.00113	0.0129968	0.930481	NA
CAD	noDM	8	TDH	pseudogene	non-coding intronic	11208903	rs2572385	A	G	G	345225	1.00178	0.0146109	0.903068	NA
CAD	DM	8	TDH	pseudogene	non-coding intronic	11208903	rs2572385	A	G	G	36749	1.00062	0.0283799	0.982606	NA
CAD	Overall	8	TDH	pseudogene	non-coding intronic	11217284	rs4363158	C	T	T	381974	0.997227	0.0130448	0.831458	NA
CAD	noDM	8	TDH	pseudogene	non-coding intronic	11217284	rs4363158	C	T	T	345225	0.995477	0.0146674	0.757274	NA
CAD	DM	8	TDH	pseudogene	non-coding intronic	11217284	rs4363158	C	T	T	36749	1.00608	0.028466	0.831264	NA
CAD	Overall	8	TDH	pseudogene	non-coding intronic	11219781	rs2736278	T	C	C	381974	0.999072	0.0130378	0.943228	NA
CAD	noDM	8	TDH	pseudogene	non-coding intronic	11219781	rs2736278	T	C	C	345225	0.997782	0.0146581	0.87961	NA
CAD	DM	8	TDH	pseudogene	non-coding intronic	11219781	rs2736278	T	C	C	36749	1.00609	0.0284594	0.830951	NA
CAD	Overall	8	CTSB	protein_coding	3downstream,intronic,3utr	11701096	rs8005	C	A	A	381974	0.994059	0.0142509	0.675849	NA
CAD	noDM	8	CTSB	protein_coding	3downstream,intronic,3utr	11701096	rs8005	C	A	A	345225	1.00049	0.0159861	0.975647	NA
CAD	DM	8	CTSB	protein_coding	3downstream,intronic,3utr	11701096	rs8005	C	A	A	36749	0.969801	0.031366	0.328249	NA
CAD	Overall	8	CTSB	protein_coding	3downstream,intronic,5upstream,non-coding intronic	11703652	rs6601616	G	A	G	381974	1.00527	0.0162824	0.746669	NA
CAD	noDM	8	CTSB	protein_coding	3downstream,intronic,5upstream,non-coding intronic	11703652	rs6601616	G	A	G	345225	1.00862	0.0183257	0.639645	NA
CAD	DM	8	CTSB	protein_coding	3downstream,intronic,5upstream,non-coding intronic	11703652	rs6601616	G	A	G	36749	0.993029	0.0353659	0.843206	NA
CAD	Overall	8	CTSB	protein_coding	non-coding intronic,3downstream,5upstream,intronic	11708684	rs546172309	AT	A	AT	381974	1.0205	0.0387302	0.600378	NA
CAD	noDM	8	CTSB	protein_coding	non-coding intronic,3downstream,5upstream,intronic	11708684	rs546172309	AT	A	AT	345225	1.00831	0.0438729	0.850471	NA
CAD	DM	8	CTSB	protein_coding	non-coding intronic,3downstream,5upstream,intronic	11708684	rs546172309	AT	A	AT	36749	1.06209	0.082379	0.464649	NA
CAD	Overall	8	CTSB	protein_coding	non-coding,5utr,5upstream	11710974	rs1137063	A	G	A	381974	1.02069	0.0238978	0.391486	NA
CAD	noDM	8	CTSB	protein_coding	non-coding,5utr,5upstream	11710974	rs1137063	A	G	A	345225	1.02484	0.0269228	0.362096	NA
CAD	DM	8	CTSB	protein_coding	non-coding,5utr,5upstream	11710974	rs1137063	A	G	A	36749	1.00663	0.0517125	0.898259	NA
CAD	Overall	8	CTSB	protein_coding	intronic,5upstream,non-coding intronic	11725283	rs1293310	T	C	T	381974	0.996395	0.0141492	0.798534	NA
CAD	noDM	8	CTSB	protein_coding	intronic,5upstream,non-coding intronic	11725283	rs1293310	T	C	T	345225	1.00688	0.015895	0.66603	NA
CAD	DM	8	CTSB	protein_coding	intronic,5upstream,non-coding intronic	11725283	rs1293310	T	C	T	36749	0.956726	0.0309542	0.152964	NA
CAD	Overall	8	MTUS1	protein_coding	non-coding intronic,intronic	17626950	rs1966290	A	G	G	381974	0.981094	0.0132791	0.15061	NA
CAD	noDM	8	MTUS1	protein_coding	non-coding intronic,intronic	17626950	rs1966290	A	G	G	345225	0.98413	0.0149231	0.283724	NA
CAD	DM	8	MTUS1	protein_coding	non-coding intronic,intronic	17626950	rs1966290	A	G	G	36749	0.972463	0.0290219	0.335973	NA
CAD	Overall	8	ASAH1	protein_coding	3downstream,3utr	17913970	rs7508	A	G	G	381974	0.985163	0.0146011	0.305929	NA
CAD	noDM	8	ASAH1	protein_coding	3downstream,3utr	17913970	rs7508	A	G	G	345225	0.983828	0.0164436	0.321442	NA
CAD	DM	8	ASAH1	protein_coding	3downstream,3utr	17913970	rs7508	A	G	G	36749	0.991615	0.031682	0.790409	NA
CAD	Overall	8	ATP6V1B2	protein_coding	non-coding intronic,intronic	20056640	rs117853493	A	G	A	381974	1.04144	0.0526677	0.440779	NA
CAD	noDM	8	ATP6V1B2	protein_coding	non-coding intronic,intronic	20056640	rs117853493	A	G	A	345225	1.0555	0.0588636	0.358849	NA
CAD	DM	8	ATP6V1B2	protein_coding	non-coding intronic,intronic	20056640	rs117853493	A	G	A	36749	0.989249	0.117335	0.926601	NA
CAD	Overall	8	ATP6V1B2	protein_coding	non-coding intronic,intronic	20057082	rs7819232	C	A	C	381974	1.04136	0.0142809	0.00454475	NA
CAD	noDM	8	ATP6V1B2	protein_coding	non-coding intronic,intronic	20057082	rs7819232	C	A	C	345225	1.04303	0.0160294	0.008582	NA
CAD	DM	8	ATP6V1B2	protein_coding	non-coding intronic,intronic	20057082	rs7819232	C	A	C	36749	1.03343	0.0313671	0.294532	NA
CAD	Overall	8	ATP6V1B2	protein_coding	non-coding intronic,intronic	20058757	rs6586899	G	T	G	381974	1.01064	0.0176856	0.549437	NA
CAD	noDM	8	ATP6V1B2	protein_coding	non-coding intronic,intronic	20058757	rs6586899	G	T	G	345225	1.02261	0.019788	0.25844	NA
CAD	DM	8	ATP6V1B2	protein_coding	non-coding intronic,intronic	20058757	rs6586899	G	T	G	36749	0.966708	0.0392565	0.38841	NA
CAD	Overall	8	ATP6V1B2	protein_coding	non-coding intronic,intronic	20077296	rs78556007	T	C	T	381974	1.1503	0.0594482	0.0185026	NA
CAD	noDM	8	ATP6V1B2	protein_coding	non-coding intronic,intronic	20077296	rs78556007	T	C	T	345225	1.11445	0.0677822	0.109886	NA
CAD	DM	8	ATP6V1B2	protein_coding	non-coding intronic,intronic	20077296	rs78556007	T	C	T	36749	1.28939	0.124469	0.0411513	NA
CAD	Overall	8	SLC25A37	protein_coding	intronic,non-coding intronic	23402482	rs7844887	A	G	A	381974	1.0151	0.0155798	0.336191	NA
CAD	noDM	8	SLC25A37	protein_coding	intronic,non-coding intronic	23402482	rs7844887	A	G	A	345225	1.01368	0.0175193	0.437908	NA
CAD	DM	8	SLC25A37	protein_coding	intronic,non-coding intronic	23402482	rs7844887	A	G	A	36749	1.02214	0.033995	0.519515	NA
CAD	Overall	8	BNIP3L	protein_coding	intronic,non-coding intronic	26266252	rs141808794	A	G	A	381974	0.972593	0.0465369	0.550404	NA
CAD	noDM	8	BNIP3L	protein_coding	intronic,non-coding intronic	26266252	rs141808794	A	G	A	345225	0.995184	0.0520158	0.92606	NA
CAD	DM	8	BNIP3L	protein_coding	intronic,non-coding intronic	26266252	rs141808794	A	G	A	36749	0.892838	0.10341	0.273021	NA
CAD	Overall	8	DPYSL2	protein_coding	intronic	26382839	rs28575479	T	C	T	381974	0.976317	0.0173618	0.16744	NA
CAD	noDM	8	DPYSL2	protein_coding	intronic	26382839	rs28575479	T	C	T	345225	0.991751	0.0194513	0.670208	NA
CAD	DM	8	DPYSL2	protein_coding	intronic	26382839	rs28575479	T	C	T	36749	0.919248	0.038357	0.0281535	NA
CAD	Overall	8	DPYSL2	protein_coding	intronic	26400135	rs10107066	C	G	C	381974	1.00477	0.0150417	0.751895	NA
CAD	noDM	8	DPYSL2	protein_coding	intronic	26400135	rs10107066	C	G	C	345225	1.01527	0.0168697	0.369035	NA
CAD	DM	8	DPYSL2	protein_coding	intronic	26400135	rs10107066	C	G	C	36749	0.964284	0.0331124	0.272041	NA
CAD	Overall	8	WRN	protein_coding	intronic	30934923	rs5890551	AT	A	A	381974	1.01823	0.0134011	0.177527	NA
CAD	noDM	8	WRN	protein_coding	intronic	30934923	rs5890551	AT	A	A	345225	1.02612	0.0150843	0.087343	NA
CAD	DM	8	WRN	protein_coding	intronic	30934923	rs5890551	AT	A	A	36749	0.991607	0.029124	0.772275	NA
CAD	Overall	8	FAM110B	protein_coding	non-coding intronic	59104799	rs1395613	C	A	C	381974	1.01624	0.0351757	0.647071	NA
CAD	noDM	8	FAM110B	protein_coding	non-coding intronic	59104799	rs1395613	C	A	C	345225	1.01115	0.0398986	0.781158	NA
CAD	DM	8	FAM110B	protein_coding	non-coding intronic	59104799	rs1395613	C	A	C	36749	1.02946	0.0744845	0.696722	NA
CAD	Overall	8	ADHFE1	protein_coding	non-coding intronic,intronic	67354250	rs7005366	T	C	C	381974	1.02732	0.0129787	0.0378338	NA
CAD	noDM	8	ADHFE1	protein_coding	non-coding intronic,intronic	67354250	rs7005366	T	C	C	345225	1.02995	0.0145925	0.0431154	NA
CAD	DM	8	ADHFE1	protein_coding	non-coding intronic,intronic	67354250	rs7005366	T	C	C	36749	1.01585	0.0283137	0.578571	NA
CAD	Overall	8	LACTB2	protein_coding	intronic	71571981	rs17687300	C	T	C	381974	0.969588	0.0296608	0.297757	NA
CAD	Overall	8	RP11-382J12.1	protein_coding	intronic	71571981	rs17687300	C	T	C	381974	0.969588	0.0296608	0.297757	NA
CAD	noDM	8	LACTB2	protein_coding	intronic	71571981	rs17687300	C	T	C	345225	0.966442	0.0334543	0.307585	NA
CAD	noDM	8	RP11-382J12.1	protein_coding	intronic	71571981	rs17687300	C	T	C	345225	0.966442	0.0334543	0.307585	NA
CAD	DM	8	LACTB2	protein_coding	intronic	71571981	rs17687300	C	T	C	36749	0.98429	0.0640627	0.804778	NA
CAD	DM	8	RP11-382J12.1	protein_coding	intronic	71571981	rs17687300	C	T	C	36749	0.98429	0.0640627	0.804778	NA
CAD	Overall	8	XKR9	protein_coding	non-coding intronic,intronic	71602995	rs7844508	T	G	G	381974	0.996569	0.013284	0.795851	NA
CAD	noDM	8	XKR9	protein_coding	non-coding intronic,intronic	71602995	rs7844508	T	G	G	345225	1.0045	0.0149282	0.763398	NA
CAD	DM	8	XKR9	protein_coding	non-coding intronic,intronic	71602995	rs7844508	T	G	G	36749	0.968363	0.0290271	0.26807	NA
CAD	Overall	8	TMEM70	protein_coding	5utr,non-coding intronic,non-coding	74888494	rs2306486	T	C	T	381974	0.952647	0.0140242	0.000542011	NA
CAD	noDM	8	TMEM70	protein_coding	5utr,non-coding intronic,non-coding	74888494	rs2306486	T	C	T	345225	0.967165	0.0157348	0.0338562	NA
CAD	DM	8	TMEM70	protein_coding	5utr,non-coding intronic,non-coding	74888494	rs2306486	T	C	T	36749	0.900305	0.030815	0.000654096	NA
CAD	Overall	8	NDUFAF6	protein_coding	intronic	95949666	rs113910919	G	C	G	381974	1.05693	0.016962	0.00109814	NA
CAD	Overall	8	TP53INP1	protein_coding	intronic	95949666	rs113910919	G	C	G	381974	1.05693	0.016962	0.00109814	NA
CAD	noDM	8	NDUFAF6	protein_coding	intronic	95949666	rs113910919	G	C	G	345225	1.05738	0.0191137	0.00351273	NA
CAD	noDM	8	TP53INP1	protein_coding	intronic	95949666	rs113910919	G	C	G	345225	1.05738	0.0191137	0.00351273	NA
CAD	DM	8	NDUFAF6	protein_coding	intronic	95949666	rs113910919	G	C	G	36749	1.05487	0.0366981	0.14554	NA
CAD	DM	8	TP53INP1	protein_coding	intronic	95949666	rs113910919	G	C	G	36749	1.05487	0.0366981	0.14554	NA
CAD	Overall	8	NDUFAF6	protein_coding	non-coding intronic,intronic,5utr	95988209	rs6983948	T	C	C	381974	1.03456	0.0129733	0.00882494	NA
CAD	noDM	8	NDUFAF6	protein_coding	non-coding intronic,intronic,5utr	95988209	rs6983948	T	C	C	345225	1.02849	0.0145692	0.0538429	NA
CAD	DM	8	NDUFAF6	protein_coding	non-coding intronic,intronic,5utr	95988209	rs6983948	T	C	C	36749	1.05614	0.0284407	0.0548017	NA
CAD	Overall	8	NDUFAF6	protein_coding	intronic	96044076	rs11781001	A	G	A	381974	1.04053	0.0179936	0.02723	NA
CAD	noDM	8	NDUFAF6	protein_coding	intronic	96044076	rs11781001	A	G	A	345225	1.04342	0.0202393	0.0357188	NA
CAD	DM	8	NDUFAF6	protein_coding	intronic	96044076	rs11781001	A	G	A	36749	1.02756	0.0391815	0.487831	NA
CAD	Overall	8	SLC30A8	protein_coding	3downstream,3utr	118185025	rs3802177	A	G	A	381974	1.01208	0.0140255	0.39206	NA
CAD	noDM	8	SLC30A8	protein_coding	3downstream,3utr	118185025	rs3802177	A	G	A	345225	1.01767	0.0157062	0.264637	NA
CAD	DM	8	SLC30A8	protein_coding	3downstream,3utr	118185025	rs3802177	A	G	A	36749	0.988836	0.0311077	0.718177	NA
CAD	Overall	8	CYP11B2	protein_coding	3utr	143992218	rs3802228	G	A	A	381974	1.01338	0.0130232	0.307434	NA
CAD	Overall	8	GML	protein_coding	intronic	143992218	rs3802228	G	A	A	381974	1.01338	0.0130232	0.307434	NA
CAD	noDM	8	CYP11B2	protein_coding	3utr	143992218	rs3802228	G	A	A	345225	1.01178	0.0146334	0.423516	NA
CAD	noDM	8	GML	protein_coding	intronic	143992218	rs3802228	G	A	A	345225	1.01178	0.0146334	0.423516	NA
CAD	DM	8	CYP11B2	protein_coding	3utr	143992218	rs3802228	G	A	A	36749	1.01918	0.028484	0.504854	NA
CAD	DM	8	GML	protein_coding	intronic	143992218	rs3802228	G	A	A	36749	1.01918	0.028484	0.504854	NA
CAD	Overall	8	CYP11B2	protein_coding	3utr	143992864	rs3802230	A	C	C	381974	1.01327	0.0130232	0.31155	NA
CAD	Overall	8	GML	protein_coding	intronic	143992864	rs3802230	A	C	C	381974	1.01327	0.0130232	0.31155	NA
CAD	noDM	8	CYP11B2	protein_coding	3utr	143992864	rs3802230	A	C	C	345225	1.01197	0.0146333	0.416068	NA
CAD	noDM	8	GML	protein_coding	intronic	143992864	rs3802230	A	C	C	345225	1.01197	0.0146333	0.416068	NA
CAD	DM	8	CYP11B2	protein_coding	3utr	143992864	rs3802230	A	C	C	36749	1.01786	0.0284852	0.534309	NA
CAD	DM	8	GML	protein_coding	intronic	143992864	rs3802230	A	C	C	36749	1.01786	0.0284852	0.534309	NA
CAD	Overall	8	GML	protein_coding	intronic	143996365	rs6399	A	G	A	381974	0.994889	0.0131219	0.696153	NA
CAD	Overall	8	CYP11B2	protein_coding	intronic	143996365	rs6399	A	G	A	381974	0.994889	0.0131219	0.696153	NA
CAD	noDM	8	GML	protein_coding	intronic	143996365	rs6399	A	G	A	345225	0.999637	0.014736	0.98037	NA
CAD	noDM	8	CYP11B2	protein_coding	intronic	143996365	rs6399	A	G	A	345225	0.999637	0.014736	0.98037	NA
CAD	DM	8	GML	protein_coding	intronic	143996365	rs6399	A	G	A	36749	0.976854	0.0287636	0.415553	NA
CAD	DM	8	CYP11B2	protein_coding	intronic	143996365	rs6399	A	G	A	36749	0.976854	0.0287636	0.415553	NA
CAD	Overall	8	TOP1MT	protein_coding	3downstream,intronic	144425024	rs55729288	A	G	A	381974	1.01875	0.0317968	0.559064	NA
CAD	noDM	8	TOP1MT	protein_coding	3downstream,intronic	144425024	rs55729288	A	G	A	345225	1.04514	0.0353612	0.211826	NA
CAD	DM	8	TOP1MT	protein_coding	3downstream,intronic	144425024	rs55729288	A	G	A	36749	0.920667	0.0720719	0.251437	NA
CAD	Overall	8	TOP1MT	protein_coding	intronic,5upstream,non-coding intronic	144427344	rs72701741	T	C	T	381974	1.02226	0.0142648	0.122814	NA
CAD	noDM	8	TOP1MT	protein_coding	intronic,5upstream,non-coding intronic	144427344	rs72701741	T	C	T	345225	1.0217	0.0160262	0.180415	NA
CAD	DM	8	TOP1MT	protein_coding	intronic,5upstream,non-coding intronic	144427344	rs72701741	T	C	T	36749	1.02257	0.031226	0.474819	NA
CAD	Overall	8	TOP1MT	protein_coding	intronic,non-coding intronic	144440615	rs55949834	C	T	C	381974	1.0068	0.0318832	0.831581	NA
CAD	noDM	8	TOP1MT	protein_coding	intronic,non-coding intronic	144440615	rs55949834	C	T	C	345225	1.03408	0.0354693	0.34477	NA
CAD	DM	8	TOP1MT	protein_coding	intronic,non-coding intronic	144440615	rs55949834	C	T	C	36749	0.906217	0.0721921	0.172541	NA
CAD	Overall	8	PLEC	protein_coding	5upstream,non-coding intronic,intronic	145018354	rs11786896	T	C	T	381974	1.00673	0.0299869	0.823121	NA
[truncated: 2,174 more rows]

## Sheet: CVD
PHENO	COHORT	CHROM	Overlapped Gene	Type	Annotation	BP	RS	REF	ALT	A1	OBS_CT	OR.or.BETA	SE.or.LOG(OR)_SE	P	SP2
CVD	Overall	1	MRPL20	protein_coding	intronic,non-coding intronic,3downstream	1339288	rs35299041	G	C	G	381994	0.974229	0.0126555	0.0391041	NA
CVD	noDM	1	MRPL20	protein_coding	intronic,non-coding intronic,3downstream	1339288	rs35299041	G	C	G	345245	0.967313	0.0133941	0.0130956	NA
CVD	DM	1	MRPL20	protein_coding	intronic,non-coding intronic,3downstream	1339288	rs35299041	G	C	G	36749	1.03562	0.0391976	0.371928	NA
CVD	Overall	1	C1orf167	protein_coding	5upstream,non-coding intronic,intronic	11847335	rs183631107	C	G	C	381994	0.870268	0.0271994	3.2438e-07	NONE
CVD	Overall	1	MTHFR	protein_coding	3utr,3downstream	11847335	rs183631107	C	G	C	381994	0.870268	0.0271994	3.2438e-07	NONE
CVD	noDM	1	C1orf167	protein_coding	5upstream,non-coding intronic,intronic	11847335	rs183631107	C	G	C	345245	0.867643	0.0287384	7.80244e-07	NONE
CVD	noDM	1	MTHFR	protein_coding	3utr,3downstream	11847335	rs183631107	C	G	C	345245	0.867643	0.0287384	7.80244e-07	NONE
CVD	DM	1	C1orf167	protein_coding	5upstream,non-coding intronic,intronic	11847335	rs183631107	C	G	C	36749	0.889089	0.0848989	0.16615	NA
CVD	DM	1	MTHFR	protein_coding	3utr,3downstream	11847335	rs183631107	C	G	C	36749	0.889089	0.0848989	0.16615	NA
CVD	Overall	1	MTHFR	protein_coding	intronic	11851927	rs41394446	T	C	T	381994	1.0506	0.0120709	4.3216e-05	NA
CVD	noDM	1	MTHFR	protein_coding	intronic	11851927	rs41394446	T	C	T	345245	1.04907	0.012751	0.000171939	NA
CVD	DM	1	MTHFR	protein_coding	intronic	11851927	rs41394446	T	C	T	36749	1.06372	0.0376121	0.100499	NA
CVD	Overall	1	MTHFR	protein_coding	coding nonsyn	11856378	rs1801133	A	G	A	381994	1.01663	0.00531525	0.00191622	NA
CVD	noDM	1	MTHFR	protein_coding	coding nonsyn	11856378	rs1801133	A	G	A	345245	1.01688	0.00561491	0.0028712	NA
CVD	DM	1	MTHFR	protein_coding	coding nonsyn	11856378	rs1801133	A	G	A	36749	1.01436	0.016531	0.388262	NA
CVD	Overall	1	MTHFR	protein_coding	intronic,5utr,5upstream	11864586	rs3753584	C	T	C	381994	0.9312	0.0068274	1.62047e-25	rs1057624(1),rs755027235(1),rs2184227(1),rs35134728(1),1:11847740_CCT_C(1),rs3737966(1),rs3820192(1),rs1537516(1),rs1537515(1),rs1537514(1),rs72640221(1),rs4846049(1),rs35737219(1),rs3818762(1),rs13306556(1),rs1476413(1),rs17375901(1),rs1801131(1),rs12121543(1),rs1994798(1),rs2066462(1),rs6541003(1),rs45439601(1),rs45475403(1),rs7526128(1),rs6541005(1),rs45577533(1),rs17037388(1),rs17421560(1),rs…
CVD	noDM	1	MTHFR	protein_coding	intronic,5utr,5upstream	11864586	rs3753584	C	T	C	345245	0.931867	0.00721017	1.28088e-22	rs1057624(1),rs755027235(1),rs2184227(1),rs35134728(1),1:11847740_CCT_C(1),rs3737966(1),rs3820192(1),rs1537516(1),rs1537515(1),rs1537514(1),rs72640221(1),rs4846049(1),rs35737219(1),rs3818762(1),rs13306556(1),rs1476413(1),rs17375901(1),rs1801131(1),rs12121543(1),rs1994798(1),rs2066462(1),rs6541003(1),rs45439601(1),rs45475403(1),rs7526128(1),rs6541005(1),rs45577533(1),rs17037388(1),rs17421560(1),rs…
CVD	DM	1	MTHFR	protein_coding	intronic,5utr,5upstream	11864586	rs3753584	C	T	C	36749	0.925875	0.0212843	0.000296372	NA
CVD	Overall	1	CLIC4	protein_coding	non-coding intronic,intronic	25097223	rs200984770	C	CTTT	CTTT	381994	1.0295	0.00561819	2.27286e-07	NA
CVD	noDM	1	CLIC4	protein_coding	non-coding intronic,intronic	25097223	rs200984770	C	CTTT	CTTT	345245	1.028	0.00593233	3.25214e-06	NA
CVD	DM	1	CLIC4	protein_coding	non-coding intronic,intronic	25097223	rs200984770	C	CTTT	CTTT	36749	1.04192	0.0175594	0.0193613	NA
CVD	Overall	1	CLIC4	protein_coding	non-coding intronic,intronic	25113487	rs9661655	G	C	G	381994	1.02987	0.00557671	1.30618e-07	rs4649017(1),rs1890449(1),rs765482915(1),rs66958265(1),rs4649018(1),rs4648874(1),rs7525139(1),rs6670470(1),rs12029925(1),rs6604978(1),rs1981195(1),rs35494633(1),rs3122053(1),rs3120831(1),rs6692599(1),rs757222137(1),1:25097214_ATTC_A(1),rs200984770(1),rs9332415(1),rs7548438(1),rs6604979(1),rs71652338(1),rs12133698(1),rs199522856(1),rs4562565(1),rs4549986(1),rs10903102(1),rs7550184(1),rs4641258(1),…
CVD	noDM	1	CLIC4	protein_coding	non-coding intronic,intronic	25113487	rs9661655	G	C	G	345245	1.02828	0.00588879	2.17616e-06	NA
CVD	DM	1	CLIC4	protein_coding	non-coding intronic,intronic	25113487	rs9661655	G	C	G	36749	1.04308	0.0174259	0.0155119	NA
CVD	Overall	1	CLIC4	protein_coding	non-coding intronic,intronic	25147689	rs11400541	GA	G	GA	381994	1.02925	0.00566622	3.63194e-07	NA
CVD	noDM	1	CLIC4	protein_coding	non-coding intronic,intronic	25147689	rs11400541	GA	G	GA	345245	1.02786	0.00598258	4.37468e-06	NA
CVD	DM	1	CLIC4	protein_coding	non-coding intronic,intronic	25147689	rs11400541	GA	G	GA	36749	1.04057	0.0177204	0.0248281	NA
CVD	Overall	1	RP5-864K19.4	antisense	non-coding intronic	39363294	rs61780049	G	A	G	381994	1.01919	0.00706795	0.00716929	NA
CVD	Overall	1	RHBDL2	protein_coding	intronic	39363294	rs61780049	G	A	G	381994	1.01919	0.00706795	0.00716929	NA
CVD	noDM	1	RP5-864K19.4	antisense	non-coding intronic	39363294	rs61780049	G	A	G	345245	1.01297	0.00746846	0.0844485	NA
CVD	noDM	1	RHBDL2	protein_coding	intronic	39363294	rs61780049	G	A	G	345245	1.01297	0.00746846	0.0844485	NA
CVD	DM	1	RP5-864K19.4	antisense	non-coding intronic	39363294	rs61780049	G	A	G	36749	1.07562	0.0221108	0.000978046	NA
CVD	DM	1	RHBDL2	protein_coding	intronic	39363294	rs61780049	G	A	G	36749	1.07562	0.0221108	0.000978046	NA
CVD	Overall	1	HEYL	protein_coding	intronic	40095534	rs72663570	T	C	T	381994	0.996857	0.00677849	0.642311	NA
CVD	noDM	1	HEYL	protein_coding	intronic	40095534	rs72663570	T	C	T	345245	0.997775	0.00716001	0.755761	NA
CVD	DM	1	HEYL	protein_coding	intronic	40095534	rs72663570	T	C	T	36749	0.988372	0.0210714	0.57884	NA
CVD	Overall	1	TRIT1	protein_coding	non-coding intronic,intronic,coding frameshift:stop-loss	40341762	rs144707726	CA	C	CA	381994	1.01732	0.00592153	0.00372381	NA
CVD	noDM	1	TRIT1	protein_coding	non-coding intronic,intronic,coding frameshift:stop-loss	40341762	rs144707726	CA	C	CA	345245	1.01518	0.00625537	0.0160354	NA
CVD	DM	1	TRIT1	protein_coding	non-coding intronic,intronic,coding frameshift:stop-loss	40341762	rs144707726	CA	C	CA	36749	1.03347	0.0184558	0.0744344	NA
CVD	Overall	1	ATG4C	protein_coding	intronic	63265523	rs58583743	A	G	A	381994	0.996584	0.00672296	0.610735	NA
CVD	noDM	1	ATG4C	protein_coding	intronic	63265523	rs58583743	A	G	A	345245	0.993254	0.00710303	0.340637	NA
CVD	DM	1	ATG4C	protein_coding	intronic	63265523	rs58583743	A	G	A	36749	1.0241	0.0209699	0.256017	NA
CVD	Overall	1	ATG4C	protein_coding	intronic	63272138	rs943696	A	G	A	381994	0.996708	0.00672528	0.62397	NA
CVD	noDM	1	ATG4C	protein_coding	intronic	63272138	rs943696	A	G	A	345245	0.993139	0.00710593	0.332651	NA
CVD	DM	1	ATG4C	protein_coding	intronic	63272138	rs943696	A	G	A	36749	1.0265	0.0209723	0.212359	NA
CVD	Overall	1	ATG4C	protein_coding	intronic	63274605	rs147655722	AT	A	AT	381994	0.99103	0.0151245	0.551345	NA
CVD	noDM	1	ATG4C	protein_coding	intronic	63274605	rs147655722	AT	A	AT	345245	0.991642	0.0159788	0.599402	NA
CVD	DM	1	ATG4C	protein_coding	intronic	63274605	rs147655722	AT	A	AT	36749	0.98792	0.0469153	0.7956	NA
CVD	Overall	1	ATG4C	protein_coding	intronic	63280852	rs796528709	C	CT	C	381994	1.00477	0.0060669	0.433176	NA
CVD	noDM	1	ATG4C	protein_coding	intronic	63280852	rs796528709	C	CT	C	345245	1.00356	0.00640186	0.578494	NA
CVD	DM	1	ATG4C	protein_coding	intronic	63280852	rs796528709	C	CT	C	36749	1.01593	0.0190788	0.407363	NA
CVD	Overall	1	ATG4C	protein_coding	intronic	63281099	rs12406542	G	A	G	381994	1.01073	0.0112569	0.343045	NA
CVD	noDM	1	ATG4C	protein_coding	intronic	63281099	rs12406542	G	A	G	345245	1.00643	0.0118965	0.590157	NA
CVD	DM	1	ATG4C	protein_coding	intronic	63281099	rs12406542	G	A	G	36749	1.04871	0.0351335	0.175842	NA
CVD	Overall	1	ATG4C	protein_coding	intronic	63283005	rs7539616	T	C	T	381994	1.00442	0.00604867	0.465864	NA
CVD	noDM	1	ATG4C	protein_coding	intronic	63283005	rs7539616	T	C	T	345245	1.00299	0.00638267	0.639789	NA
CVD	DM	1	ATG4C	protein_coding	intronic	63283005	rs7539616	T	C	T	36749	1.01745	0.0190251	0.363057	NA
CVD	Overall	1	ATG4C	protein_coding	intronic	63290942	rs67922190	T	C	T	381994	1.00365	0.00653004	0.576921	NA
CVD	noDM	1	ATG4C	protein_coding	intronic	63290942	rs67922190	T	C	T	345245	1.00498	0.00689642	0.471732	NA
CVD	DM	1	ATG4C	protein_coding	intronic	63290942	rs67922190	T	C	T	36749	0.992172	0.0203265	0.699042	NA
CVD	Overall	1	ATG4C	protein_coding	intronic	63305579	rs569483209	GA	G	GA	381994	0.996383	0.0068092	0.594595	NA
CVD	noDM	1	ATG4C	protein_coding	intronic	63305579	rs569483209	GA	G	GA	345245	0.992838	0.00719461	0.317741	NA
CVD	DM	1	ATG4C	protein_coding	intronic	63305579	rs569483209	GA	G	GA	36749	1.02596	0.0212341	0.227504	NA
CVD	Overall	1	ATG4C	protein_coding	intronic	63310797	rs144171645	A	T	A	381994	0.996046	0.020311	0.845342	NA
CVD	noDM	1	ATG4C	protein_coding	intronic	63310797	rs144171645	A	T	A	345245	0.985623	0.0214439	0.499472	NA
CVD	DM	1	ATG4C	protein_coding	intronic	63310797	rs144171645	A	T	A	36749	1.09328	0.0646627	0.167834	NA
CVD	Overall	1	ATG4C	protein_coding	intronic	63320239	rs116466322	T	C	T	381994	1.00394	0.0123925	0.751251	NA
CVD	noDM	1	ATG4C	protein_coding	intronic	63320239	rs116466322	T	C	T	345245	1.01079	0.0130654	0.411601	NA
CVD	DM	1	ATG4C	protein_coding	intronic	63320239	rs116466322	T	C	T	36749	0.947653	0.0388027	0.165855	NA
CVD	Overall	1	ATG4C	protein_coding	intronic	63329415	rs77871448	G	A	G	381994	0.989787	0.0143176	0.473375	NA
CVD	noDM	1	ATG4C	protein_coding	intronic	63329415	rs77871448	G	A	G	345245	0.991645	0.0151201	0.578955	NA
CVD	DM	1	ATG4C	protein_coding	intronic	63329415	rs77871448	G	A	G	36749	0.975767	0.0444871	0.581339	NA
CVD	Overall	1	SGIP1	protein_coding	non-coding intronic,intronic	67010104	rs7553325	T	C	C	381994	0.985477	0.00503727	0.00368247	NA
CVD	noDM	1	SGIP1	protein_coding	non-coding intronic,intronic	67010104	rs7553325	T	C	C	345245	0.9844	0.00531951	0.00311912	NA
CVD	DM	1	SGIP1	protein_coding	non-coding intronic,intronic	67010104	rs7553325	T	C	C	36749	0.994238	0.0157144	0.713055	NA
CVD	Overall	1	SGIP1	protein_coding	non-coding intronic,intronic	67069745	rs115261885	A	G	A	381994	1.00627	0.0107315	0.560035	NA
CVD	noDM	1	SGIP1	protein_coding	non-coding intronic,intronic	67069745	rs115261885	A	G	A	345245	1.00581	0.0113431	0.609412	NA
CVD	DM	1	SGIP1	protein_coding	non-coding intronic,intronic	67069745	rs115261885	A	G	A	36749	1.01153	0.0332425	0.730282	NA
CVD	Overall	1	SGIP1	protein_coding	non-coding,coding nonsyn,coding *nonsyn	67109335	rs7526812	G	A	G	381994	1.00594	0.0069274	0.392944	NA
CVD	noDM	1	SGIP1	protein_coding	non-coding,coding nonsyn,coding *nonsyn	67109335	rs7526812	G	A	G	345245	1.00995	0.00731062	0.175687	NA
CVD	DM	1	SGIP1	protein_coding	non-coding,coding nonsyn,coding *nonsyn	67109335	rs7526812	G	A	G	36749	0.972294	0.0216343	0.19404	NA
CVD	Overall	1	CCBL2	protein_coding	intronic,non-coding intronic	89408394	rs12732490	T	C	T	381994	1.02936	0.00513536	1.74871e-08	NA
CVD	noDM	1	CCBL2	protein_coding	intronic,non-coding intronic	89408394	rs12732490	T	C	T	345245	1.03136	0.00542189	1.22738e-08	NA
CVD	DM	1	CCBL2	protein_coding	intronic,non-coding intronic	89408394	rs12732490	T	C	T	36749	1.01236	0.0160372	0.443595	NA
CVD	Overall	1	CCBL2	protein_coding	non-coding intronic,intronic	89410840	rs11391031	GT	G	GT	381994	0.963296	0.00823439	5.5904e-06	NA
CVD	noDM	1	CCBL2	protein_coding	non-coding intronic,intronic	89410840	rs11391031	GT	G	GT	345245	0.955316	0.00870745	1.52233e-07	rs17130657(1),rs60436973(1),rs17471884(1),rs17472003(1),1:89410321_CAA_C(1),rs12064123(1),rs1325921(1),rs17432348(1),rs114836593(1),rs3820243(1),rs10518418(1),rs78329324(1),rs150279348(1),rs574418374(1),rs149571223(1),rs777582210(1),rs41288369(1),rs76109623(1),rs56673908(1)
CVD	DM	1	CCBL2	protein_coding	non-coding intronic,intronic	89410840	rs11391031	GT	G	GT	36749	1.03612	0.0257065	0.167449	NA
CVD	Overall	1	SARS	protein_coding	intronic,non-coding,non-coding intronic	109757295	rs4970829	A	G	A	381994	0.976106	0.00973564	0.0129877	NA
CVD	noDM	1	SARS	protein_coding	intronic,non-coding,non-coding intronic	109757295	rs4970829	A	G	A	345245	0.970656	0.0103012	0.00383786	NA
CVD	DM	1	SARS	protein_coding	intronic,non-coding,non-coding intronic	109757295	rs4970829	A	G	A	36749	1.02423	0.0301465	0.427038	NA
CVD	Overall	1	SARS	protein_coding	non-coding intronic,3downstream,intronic	109759776	rs685653	G	A	G	381994	1.00439	0.00584261	0.453246	NA
CVD	noDM	1	SARS	protein_coding	non-coding intronic,3downstream,intronic	109759776	rs685653	G	A	G	345245	1.00416	0.00616852	0.500608	NA
CVD	DM	1	SARS	protein_coding	non-coding intronic,3downstream,intronic	109759776	rs685653	G	A	G	36749	1.00828	0.0182704	0.651796	NA
CVD	Overall	1	SARS	protein_coding	intronic,non-coding intronic	109760555	rs61799425	C	T	C	381994	0.976236	0.00974533	0.0135893	NA
CVD	noDM	1	SARS	protein_coding	intronic,non-coding intronic	109760555	rs61799425	C	T	C	345245	0.970811	0.0103116	0.00406841	NA
CVD	DM	1	SARS	protein_coding	intronic,non-coding intronic	109760555	rs61799425	C	T	C	36749	1.02415	0.0301707	0.429045	NA
CVD	Overall	1	SARS	protein_coding	non-coding intronic,intronic	109762333	rs2485323	T	C	T	381994	1.00164	0.00603123	0.786037	NA
CVD	noDM	1	SARS	protein_coding	non-coding intronic,intronic	109762333	rs2485323	T	C	T	345245	1.001	0.00636637	0.875706	NA
CVD	DM	1	SARS	protein_coding	non-coding intronic,intronic	109762333	rs2485323	T	C	T	36749	1.0092	0.0189006	0.627899	NA
CVD	Overall	1	SARS	protein_coding	non-coding intronic,intronic	109763768	rs55723005	T	C	T	381994	0.999	0.0091271	0.912697	NA
CVD	noDM	1	SARS	protein_coding	non-coding intronic,intronic	109763768	rs55723005	T	C	T	345245	1.0044	0.00962685	0.648486	NA
CVD	DM	1	SARS	protein_coding	non-coding intronic,intronic	109763768	rs55723005	T	C	T	36749	0.952504	0.0285403	0.0881931	NA
CVD	Overall	1	SARS	protein_coding	non-coding intronic,intronic	109763924	rs1277928	A	G	A	381994	1.01079	0.00799784	0.179616	NA
CVD	noDM	1	SARS	protein_coding	non-coding intronic,intronic	109763924	rs1277928	A	G	A	345245	1.01279	0.00843729	0.132008	NA
CVD	DM	1	SARS	protein_coding	non-coding intronic,intronic	109763924	rs1277928	A	G	A	36749	0.993098	0.0251062	0.782649	NA
CVD	Overall	1	SARS	protein_coding	non-coding intronic,intronic	109766191	rs626784	T	C	T	381994	1.01084	0.00802024	0.178927	NA
CVD	noDM	1	SARS	protein_coding	non-coding intronic,intronic	109766191	rs626784	T	C	T	345245	1.01299	0.00846073	0.12703	NA
CVD	DM	1	SARS	protein_coding	non-coding intronic,intronic	109766191	rs626784	T	C	T	36749	0.991818	0.0251758	0.744184	NA
CVD	Overall	1	SARS	protein_coding	intronic,non-coding intronic	109776285	rs35271870	C	T	C	381994	0.982284	0.00891823	0.0450361	NA
CVD	noDM	1	SARS	protein_coding	intronic,non-coding intronic	109776285	rs35271870	C	T	C	345245	0.982836	0.00941571	0.065957	NA
CVD	DM	1	SARS	protein_coding	intronic,non-coding intronic	109776285	rs35271870	C	T	C	36749	0.976076	0.0278524	0.384634	NA
CVD	Overall	1	SARS	protein_coding	non-coding intronic,intronic,5upstream	109777764	rs114166723	A	G	A	381994	0.996344	0.0171565	0.830946	NA
CVD	noDM	1	SARS	protein_coding	non-coding intronic,intronic,5upstream	109777764	rs114166723	A	G	A	345245	1.00451	0.018117	0.803781	NA
CVD	DM	1	SARS	protein_coding	non-coding intronic,intronic,5upstream	109777764	rs114166723	A	G	A	36749	0.929316	0.0528797	0.16566	NA
CVD	Overall	1	SARS	protein_coding	3downstream,intronic,5upstream	109778237	rs4268379	T	C	T	381994	1.00641	0.00502954	0.204043	NA
CVD	noDM	1	SARS	protein_coding	3downstream,intronic,5upstream	109778237	rs4268379	T	C	T	345245	1.00495	0.00530873	0.352307	NA
CVD	DM	1	SARS	protein_coding	3downstream,intronic,5upstream	109778237	rs4268379	T	C	T	36749	1.01985	0.0157572	0.212169	NA
CVD	Overall	1	GSTM4	protein_coding	5utr,5upstream	110198709	rs566427988	C	G	C	381994	1.0055	0.0200295	0.784362	NA
CVD	noDM	1	GSTM4	protein_coding	5utr,5upstream	110198709	rs566427988	C	G	C	345245	1.00718	0.0211639	0.735384	NA
CVD	DM	1	GSTM4	protein_coding	5utr,5upstream	110198709	rs566427988	C	G	C	36749	0.996325	0.0619925	0.952643	NA
CVD	Overall	1	GSTM4	protein_coding	5upstream,5utr	110198727	rs1010167	G	C	G	381994	0.999601	0.00517553	0.938587	NA
CVD	noDM	1	GSTM4	protein_coding	5upstream,5utr	110198727	rs1010167	G	C	G	345245	0.996287	0.00546689	0.496257	NA
CVD	DM	1	GSTM4	protein_coding	5upstream,5utr	110198727	rs1010167	G	C	G	36749	1.02986	0.0161337	0.0681864	NA
CVD	Overall	1	GSTM4	protein_coding	non-coding intronic,3downstream,intronic	110201580	rs650985	T	C	C	381994	0.980566	0.00998029	0.0492518	NA
CVD	noDM	1	GSTM4	protein_coding	non-coding intronic,3downstream,intronic	110201580	rs650985	T	C	C	345245	0.986994	0.0105453	0.214454	NA
CVD	DM	1	GSTM4	protein_coding	non-coding intronic,3downstream,intronic	110201580	rs650985	T	C	C	36749	0.927507	0.0306982	0.014229	NA
CVD	Overall	1	GSTM2	protein_coding	intronic	110248468	rs1296955	G	A	A	381994	0.993	0.00777935	0.36657	NA
CVD	Overall	1	GSTM1	protein_coding	non-coding intronic,intronic	110248468	rs1296955	G	A	A	381994	0.993	0.00777935	0.36657	NA
CVD	noDM	1	GSTM2	protein_coding	intronic	110248468	rs1296955	G	A	A	345245	0.993268	0.00821719	0.411044	NA
CVD	noDM	1	GSTM1	protein_coding	non-coding intronic,intronic	110248468	rs1296955	G	A	A	345245	0.993268	0.00821719	0.411044	NA
CVD	DM	1	GSTM2	protein_coding	intronic	110248468	rs1296955	G	A	A	36749	0.986488	0.0242036	0.574078	NA
CVD	DM	1	GSTM1	protein_coding	non-coding intronic,intronic	110248468	rs1296955	G	A	A	36749	0.986488	0.0242036	0.574078	NA
CVD	Overall	1	RHOC	protein_coding	non-coding intronic,3downstream,intronic	113244433	rs2279500	C	T	T	381994	0.95794	0.00673718	1.79294e-10	rs3795820(1),rs6537746(1),rs4838960(1),1:113163910_ATT_A(1),rs4838961(1),rs11102517(1),rs55718535(1),rs4240534(1),rs6691025(1),rs6537747(1),rs12137161(1),rs368847117(1),1:113185716_CA_C(1),rs10745331(1),rs6690292(1),1:113188587_TA_T(1),rs10745332(1),rs10857969(1),rs3013441(1),rs2932529(1),rs60973907(1),rs7512984(1),rs9662162(1),rs11408839(1),rs2932534(1),rs2932535(1),rs12750621(1),rs6682678(1),rs…
CVD	noDM	1	RHOC	protein_coding	non-coding intronic,3downstream,intronic	113244433	rs2279500	C	T	T	345245	0.957904	0.00711308	1.48212e-09	rs3795820(1),rs6537746(1),rs4838960(1),1:113163910_ATT_A(1),rs4838961(1),rs11102517(1),rs55718535(1),rs4240534(1),rs6691025(1),rs6537747(1),rs12137161(1),rs368847117(1),1:113185716_CA_C(1),rs10745331(1),rs6690292(1),1:113188587_TA_T(1),rs10745332(1),rs10857969(1),rs3013441(1),rs2932529(1),rs60973907(1),rs7512984(1),rs9662162(1),rs11408839(1),rs2932534(1),rs2932535(1),rs12750621(1),rs6682678(1),rs…
CVD	DM	1	RHOC	protein_coding	non-coding intronic,3downstream,intronic	113244433	rs2279500	C	T	T	36749	0.958048	0.0210613	0.0418618	NA
CVD	Overall	1	RP11-426L16.10	protein_coding	non-coding intronic,intronic	113247563	rs2279499	A	G	A	381994	1.03058	0.00618683	1.1259e-06	NA
CVD	Overall	1	RHOC	protein_coding	5utr,non-coding,intronic,5upstream,non-coding intronic	113247563	rs2279499	A	G	A	381994	1.03058	0.00618683	1.1259e-06	NA
CVD	noDM	1	RP11-426L16.10	protein_coding	non-coding intronic,intronic	113247563	rs2279499	A	G	A	345245	1.0292	0.00653302	1.05644e-05	NA
CVD	noDM	1	RHOC	protein_coding	5utr,non-coding,intronic,5upstream,non-coding intronic	113247563	rs2279499	A	G	A	345245	1.0292	0.00653302	1.05644e-05	NA
CVD	DM	1	RP11-426L16.10	protein_coding	non-coding intronic,intronic	113247563	rs2279499	A	G	A	36749	1.04409	0.0193335	0.0256242	NA
CVD	DM	1	RHOC	protein_coding	5utr,non-coding,intronic,5upstream,non-coding intronic	113247563	rs2279499	A	G	A	36749	1.04409	0.0193335	0.0256242	NA
CVD	Overall	1	RP11-426L16.10	protein_coding	non-coding intronic,intronic	113247713	rs35221527	A	G	A	381994	0.960895	0.00673498	3.16366e-09	NA
CVD	Overall	1	RHOC	protein_coding	5upstream,non-coding intronic,non-coding,intronic,5utr	113247713	rs35221527	A	G	A	381994	0.960895	0.00673498	3.16366e-09	NA
CVD	noDM	1	RP11-426L16.10	protein_coding	non-coding intronic,intronic	113247713	rs35221527	A	G	A	345245	0.960672	0.00711122	1.67939e-08	NA
CVD	noDM	1	RHOC	protein_coding	5upstream,non-coding intronic,non-coding,intronic,5utr	113247713	rs35221527	A	G	A	345245	0.960672	0.00711122	1.67939e-08	NA
CVD	DM	1	RP11-426L16.10	protein_coding	non-coding intronic,intronic	113247713	rs35221527	A	G	A	36749	0.962595	0.0210452	0.0700674	NA
CVD	DM	1	RHOC	protein_coding	5upstream,non-coding intronic,non-coding,intronic,5utr	113247713	rs35221527	A	G	A	36749	0.962595	0.0210452	0.0700674	NA
CVD	Overall	1	SLC16A1	protein_coding	3downstream,3utr	113455099	rs7169	A	G	G	381994	0.973716	0.00505628	1.37996e-07	rs1049434(1),rs10684892(1),rs6682142(1),rs7556664(1),rs202094726(1),rs3789592(1),rs11102565(1),rs10857982(1),rs111308820(1),rs6537764(1),rs10857983(1),rs10776763(1),rs12028967(1),rs11102568(1),rs6663872(1),rs4301628(1),rs6537765(1)
CVD	noDM	1	SLC16A1	protein_coding	3downstream,3utr	113455099	rs7169	A	G	G	345245	0.970237	0.00534101	1.53986e-08	rs1049434(1),rs10684892(1),rs6682142(1),rs7556664(1),rs202094726(1),rs3789592(1),rs11102565(1),rs10857982(1),rs111308820(1),rs6537764(1),rs10857983(1),rs10776763(1),rs12028967(1),rs11102568(1),rs6663872(1),rs4301628(1),rs6537765(1)
CVD	DM	1	SLC16A1	protein_coding	3downstream,3utr	113455099	rs7169	A	G	G	36749	1.00408	0.0157499	0.796223	NA
CVD	Overall	1	SLC16A1	protein_coding	3utr,3downstream,intronic	113458987	rs6682142	A	G	A	381994	1.02847	0.00541347	2.14567e-07	NA
CVD	noDM	1	SLC16A1	protein_coding	3utr,3downstream,intronic	113458987	rs6682142	A	G	A	345245	1.03165	0.00571115	4.86863e-08	NA
CVD	DM	1	SLC16A1	protein_coding	3utr,3downstream,intronic	113458987	rs6682142	A	G	A	36749	1.00039	0.016992	0.981587	NA
CVD	Overall	1	SLC16A1	protein_coding	non-coding intronic,intronic	113481608	rs6537764	G	T	T	381994	0.973993	0.00505657	1.87592e-07	NA
CVD	noDM	1	SLC16A1	protein_coding	non-coding intronic,intronic	113481608	rs6537764	G	T	T	345245	0.970537	0.00534134	2.15759e-08	NA
CVD	DM	1	SLC16A1	protein_coding	non-coding intronic,intronic	113481608	rs6537764	G	T	T	36749	1.0042	0.0157502	0.790131	NA
CVD	Overall	1	SLC16A1	protein_coding	non-coding intronic,intronic	113491364	rs6663872	A	T	T	381994	0.974367	0.00506194	2.9e-07	NA
CVD	noDM	1	SLC16A1	protein_coding	non-coding intronic,intronic	113491364	rs6663872	A	T	T	345245	0.971049	0.00534688	3.91789e-08	NA
CVD	DM	1	SLC16A1	protein_coding	non-coding intronic,intronic	113491364	rs6663872	A	T	T	36749	1.00331	0.0157696	0.83405	NA
CVD	Overall	1	RNF115	protein_coding	intronic	145630111	rs75246752	C	G	C	381994	1.02095	0.0222515	0.351355	NA
CVD	noDM	1	RNF115	protein_coding	intronic	145630111	rs75246752	C	G	C	345245	1.0128	0.0235149	0.588481	NA
CVD	DM	1	RNF115	protein_coding	intronic	145630111	rs75246752	C	G	C	36749	1.09591	0.0699642	0.190508	NA
CVD	Overall	1	RNF115	protein_coding	3utr	145690999	rs10910842	C	G	C	381994	1.0154	0.00596222	0.0103886	NA
CVD	noDM	1	RNF115	protein_coding	3utr	145690999	rs10910842	C	G	C	345245	1.01588	0.00629683	0.0123258	NA
CVD	DM	1	RNF115	protein_coding	3utr	145690999	rs10910842	C	G	C	36749	1.01173	0.0185761	0.530204	NA
CVD	Overall	1	BOLA1	protein_coding	intronic	149864493	rs141142383	T	C	T	381994	0.980297	0.00923743	0.0312214	NA
CVD	noDM	1	BOLA1	protein_coding	intronic	149864493	rs141142383	T	C	T	345245	0.982333	0.00975006	0.0675205	NA
CVD	DM	1	BOLA1	protein_coding	intronic	149864493	rs141142383	T	C	T	36749	0.963367	0.0288578	0.195923	NA
CVD	Overall	1	BOLA1	protein_coding	non-coding,coding nonsyn	149871905	rs1044808	C	G	C	381994	0.980341	0.00913908	0.0298147	NA
CVD	noDM	1	BOLA1	protein_coding	non-coding,coding nonsyn	149871905	rs1044808	C	G	C	345245	0.982265	0.00964644	0.0635889	NA
CVD	DM	1	BOLA1	protein_coding	non-coding,coding nonsyn	149871905	rs1044808	C	G	C	36749	0.964338	0.028549	0.203383	NA
CVD	Overall	1	TARS2	protein_coding	non-coding intronic,intronic	150467096	rs141935877	A	T	A	381994	0.995079	0.00958441	0.606769	NA
CVD	noDM	1	TARS2	protein_coding	non-coding intronic,intronic	150467096	rs141935877	A	T	A	345245	0.997705	0.0101155	0.82035	NA
CVD	DM	1	TARS2	protein_coding	non-coding intronic,intronic	150467096	rs141935877	A	T	A	36749	0.973895	0.029931	0.376819	NA
CVD	Overall	1	TARS2	protein_coding	intronic,non-coding intronic,3downstream	150470478	rs11590353	A	C	A	381994	1.0032	0.00513133	0.533722	NA
CVD	noDM	1	TARS2	protein_coding	intronic,non-coding intronic,3downstream	150470478	rs11590353	A	C	A	345245	1.0042	0.005419	0.439609	NA
CVD	DM	1	TARS2	protein_coding	intronic,non-coding intronic,3downstream	150470478	rs11590353	A	C	A	36749	0.995562	0.0159994	0.780996	NA
CVD	Overall	1	TARS2	protein_coding	5upstream,non-coding intronic,intronic	150476186	rs77257036	T	C	T	381994	1.00412	0.00529959	0.437796	NA
CVD	noDM	1	TARS2	protein_coding	5upstream,non-coding intronic,intronic	150476186	rs77257036	T	C	T	345245	1.00374	0.0055946	0.504694	NA
CVD	DM	1	TARS2	protein_coding	5upstream,non-coding intronic,intronic	150476186	rs77257036	T	C	T	36749	1.00866	0.0165865	0.603047	NA
CVD	Overall	1	PRUNE	protein_coding	non-coding intronic,intronic	150986662	rs1673161	G	A	G	381994	0.992296	0.00931038	0.406166	NA
CVD	noDM	1	PRUNE	protein_coding	non-coding intronic,intronic	150986662	rs1673161	G	A	G	345245	0.994205	0.00983046	0.554366	NA
CVD	DM	1	PRUNE	protein_coding	non-coding intronic,intronic	150986662	rs1673161	G	A	G	36749	0.976133	0.0290004	0.404856	NA
CVD	Overall	1	HAX1	protein_coding	5upstream,non-coding,5utr	154245142	rs11265425	G	T	G	381994	1.00509	0.00550145	0.355966	NA
CVD	noDM	1	HAX1	protein_coding	5upstream,non-coding,5utr	154245142	rs11265425	G	T	G	345245	1.00348	0.00580942	0.550239	NA
CVD	DM	1	HAX1	protein_coding	5upstream,non-coding,5utr	154245142	rs11265425	G	T	G	36749	1.01689	0.017192	0.329974	NA
CVD	Overall	1	LMNA	protein_coding	non-coding intronic,intronic	156080441	rs59729272	AC	A	AC	381994	0.983447	0.00587685	0.00450752	NA
CVD	noDM	1	LMNA	protein_coding	non-coding intronic,intronic	156080441	rs59729272	AC	A	AC	345245	0.984387	0.00620781	0.0112467	NA
CVD	DM	1	LMNA	protein_coding	non-coding intronic,intronic	156080441	rs59729272	AC	A	AC	36749	0.976309	0.0182763	0.189556	NA
CVD	Overall	1	DNM3	protein_coding	intronic,non-coding intronic	172357441	rs12405515	T	G	G	381994	1.01903	0.00508314	0.00020792	NA
CVD	Overall	1	PIGC	protein_coding	non-coding intronic	172357441	rs12405515	T	G	G	381994	1.01903	0.00508314	0.00020792	NA
CVD	noDM	1	DNM3	protein_coding	intronic,non-coding intronic	172357441	rs12405515	T	G	G	345245	1.022	0.00536635	5.00959e-05	NA
CVD	noDM	1	PIGC	protein_coding	non-coding intronic	172357441	rs12405515	T	G	G	345245	1.022	0.00536635	5.00959e-05	NA
CVD	DM	1	DNM3	protein_coding	intronic,non-coding intronic	172357441	rs12405515	T	G	G	36749	0.99291	0.0158902	0.654319	NA
CVD	DM	1	PIGC	protein_coding	non-coding intronic	172357441	rs12405515	T	G	G	36749	0.99291	0.0158902	0.654319	NA
CVD	Overall	1	LAMC1	protein_coding	intronic	183058452	rs41475048	G	A	G	381994	1.01123	0.00578758	0.0536568	NA
CVD	noDM	1	LAMC1	protein_coding	intronic	183058452	rs41475048	G	A	G	345245	1.01045	0.00610984	0.0888509	NA
CVD	DM	1	LAMC1	protein_coding	intronic	183058452	rs41475048	G	A	G	36749	1.01815	0.0181175	0.320838	NA
CVD	Overall	1	LAMC1	protein_coding	5upstream,intronic	183077896	rs10752898	C	T	T	381994	0.99922	0.00505356	0.877251	NA
CVD	noDM	1	LAMC1	protein_coding	5upstream,intronic	183077896	rs10752898	C	T	T	345245	0.999323	0.00533498	0.898977	NA
CVD	DM	1	LAMC1	protein_coding	5upstream,intronic	183077896	rs10752898	C	T	T	36749	0.997569	0.0158049	0.877603	NA
CVD	Overall	1	GLRX2	protein_coding	non-coding intronic,intronic	193073566	rs10801174	A	T	T	381994	1.03036	0.00538018	2.71875e-08	rs4657845(1),rs10801175(1),rs10921310(1),rs912071(1),rs3079948(1)
CVD	noDM	1	GLRX2	protein_coding	non-coding intronic,intronic	193073566	rs10801174	A	T	T	345245	1.03103	0.00567976	7.42287e-08	rs4657845(1),rs10801175(1),rs10921310(1),rs912071(1),rs3079948(1)
CVD	DM	1	GLRX2	protein_coding	non-coding intronic,intronic	193073566	rs10801174	A	T	T	36749	1.02565	0.0168228	0.132205	NA
CVD	Overall	1	LYPLAL1	protein_coding	intronic,non-coding intronic	219377340	rs17049143	C	G	C	381994	0.994419	0.00551457	0.31012	NA
CVD	noDM	1	LYPLAL1	protein_coding	intronic,non-coding intronic	219377340	rs17049143	C	G	C	345245	0.993868	0.00582195	0.290765	NA
CVD	DM	1	LYPLAL1	protein_coding	intronic,non-coding intronic	219377340	rs17049143	C	G	C	36749	1.0004	0.0172497	0.981314	NA
CVD	Overall	1	SLC30A10	protein_coding	non-coding intronic	220023215	rs61836039	A	C	A	381994	1.00025	0.0176075	0.988532	NA
CVD	noDM	1	SLC30A10	protein_coding	non-coding intronic	220023215	rs61836039	A	C	A	345245	0.995419	0.0186313	0.805336	NA
CVD	DM	1	SLC30A10	protein_coding	non-coding intronic	220023215	rs61836039	A	C	A	36749	1.03943	0.0544275	0.47742	NA
CVD	Overall	1	MARC1	protein_coding	5upstream,non-coding,coding nonsyn	220970028	rs2642438	G	A	A	381994	1.00799	0.00549022	0.147164	NA
CVD	noDM	1	MARC1	protein_coding	5upstream,non-coding,coding nonsyn	220970028	rs2642438	G	A	A	345245	1.00891	0.00579853	0.125862	NA
CVD	DM	1	MARC1	protein_coding	5upstream,non-coding,coding nonsyn	220970028	rs2642438	G	A	A	36749	0.999766	0.0171002	0.989093	NA
CVD	Overall	1	MARC1	protein_coding	non-coding intronic,intronic,5upstream	220970593	rs2807834	G	T	T	381994	1.00999	0.00540977	0.0660089	NA
CVD	noDM	1	MARC1	protein_coding	non-coding intronic,intronic,5upstream	220970593	rs2807834	G	T	T	345245	1.01128	0.00571307	0.0496388	NA
CVD	DM	1	MARC1	protein_coding	non-coding intronic,intronic,5upstream	220970593	rs2807834	G	T	T	36749	0.998431	0.0168597	0.925806	NA
CVD	Overall	1	MARC1	protein_coding	non-coding intronic,intronic	220975414	rs12124030	T	G	T	381994	0.979914	0.00565399	0.000332319	NA
CVD	noDM	1	MARC1	protein_coding	non-coding intronic,intronic	220975414	rs12124030	T	G	T	345245	0.976868	0.00597433	8.95291e-05	NA
CVD	DM	1	MARC1	protein_coding	non-coding intronic,intronic	220975414	rs12124030	T	G	T	36749	1.00749	0.0175925	0.671482	NA
CVD	Overall	1	MARC1	protein_coding	non-coding intronic,3downstream,intronic	220983017	rs11118606	G	A	G	381994	1.00456	0.00572602	0.426722	NA
CVD	noDM	1	MARC1	protein_coding	non-coding intronic,3downstream,intronic	220983017	rs11118606	G	A	G	345245	1.00546	0.00604419	0.36737	NA
CVD	DM	1	MARC1	protein_coding	non-coding intronic,3downstream,intronic	220983017	rs11118606	G	A	G	36749	0.996237	0.0179164	0.833335	NA
CVD	Overall	1	MARC1	protein_coding	non-coding intronic,intronic,3downstream	220983402	rs17649913	C	T	C	381994	1.00166	0.00607705	0.784927	NA
CVD	noDM	1	MARC1	protein_coding	non-coding intronic,intronic,3downstream	220983402	rs17649913	C	T	C	345245	1.00328	0.00641455	0.609637	NA
CVD	DM	1	MARC1	protein_coding	non-coding intronic,intronic,3downstream	220983402	rs17649913	C	T	C	36749	0.988371	0.0190016	0.538181	NA
CVD	Overall	1	MARC1	protein_coding	non-coding intronic,intronic	220985811	rs903319	C	T	C	381994	0.977674	0.00570645	7.59594e-05	NA
CVD	noDM	1	MARC1	protein_coding	non-coding intronic,intronic	220985811	rs903319	C	T	C	345245	0.97443	0.0060295	1.73923e-05	NA
CVD	DM	1	MARC1	protein_coding	non-coding intronic,intronic	220985811	rs903319	C	T	C	36749	1.00666	0.0177674	0.708853	NA
CVD	Overall	1	NVL	protein_coding	non-coding intronic,intronic	224517064	rs77674430	A	G	A	381994	1.0141	0.00748688	0.0614624	NA
CVD	noDM	1	NVL	protein_coding	non-coding intronic,intronic	224517064	rs77674430	A	G	A	345245	1.01095	0.00790187	0.167988	NA
CVD	DM	1	NVL	protein_coding	non-coding intronic,intronic	224517064	rs77674430	A	G	A	36749	1.04296	0.0235702	0.0743608	NA
CVD	Overall	1	ADCK3	protein_coding	non-coding intronic,intronic	227139143	rs2482450	C	T	T	381994	0.994366	0.00501952	0.260356	NA
CVD	noDM	1	ADCK3	protein_coding	non-coding intronic,intronic	227139143	rs2482450	C	T	T	345245	0.990654	0.0052956	0.0762042	NA
CVD	DM	1	ADCK3	protein_coding	non-coding intronic,intronic	227139143	rs2482450	C	T	T	36749	1.02839	0.0157958	0.0763389	NA
CVD	Overall	1	GUK1	protein_coding	5upstream,intronic,non-coding intronic,3downstream	228331040	rs2313602	A	C	C	381994	0.966603	0.00511395	3.09361e-11	NA
CVD	noDM	1	GUK1	protein_coding	5upstream,intronic,non-coding intronic,3downstream	228331040	rs2313602	A	C	C	345245	0.968484	0.00539581	2.94038e-09	NA
CVD	DM	1	GUK1	protein_coding	5upstream,intronic,non-coding intronic,3downstream	228331040	rs2313602	A	C	C	36749	0.950918	0.0160621	0.00172851	NA
CVD	Overall	1	IBA57	protein_coding	non-coding,intronic	228359775	rs2066237	C	T	T	381994	0.965002	0.00515689	4.9092e-12	rs849749(1),rs2313602(1),rs10916268(1),rs761069536(1),rs55873533(1),rs55873785(1),rs12130630(1),rs2298014(1),rs4653915(1),1:228366119_TA_T(1),rs769863774(1),rs4653536(1),rs72757811(1),1:228369893_CTTCA_C(1),rs11800309(1),rs7532924(1),rs72757829(1),rs2313601(1),rs10799471(1),rs12024649(1),rs12726781(1),rs12745416(1),rs11799681(1),rs11804508(1),rs55971985(1),rs3121192(1),rs3121191(1),rs3121190(1),r…
CVD	noDM	1	IBA57	protein_coding	non-coding,intronic	228359775	rs2066237	C	T	T	345245	0.96666	0.00544121	4.61353e-10	rs849749(1),rs2313602(1),rs10916268(1),rs761069536(1),rs55873533(1),rs55873785(1),rs12130630(1),rs2298014(1),rs4653915(1),1:228366119_TA_T(1),rs769863774(1),rs4653536(1),rs72757811(1),1:228369893_CTTCA_C(1),rs11800309(1),rs7532924(1),rs72757829(1),rs2313601(1),rs10799471(1),rs12024649(1),rs12726781(1),rs12745416(1),rs11799681(1),rs11804508(1),rs55971985(1),rs3121192(1),rs3121191(1),rs3121190(1),r…
CVD	DM	1	IBA57	protein_coding	non-coding,intronic	228359775	rs2066237	C	T	T	36749	0.951443	0.0161955	0.00211623	NA
CVD	Overall	1	AKT3	protein_coding	intronic	243703179	rs72759896	G	A	G	381994	0.997229	0.00753234	0.712571	NA
CVD	noDM	1	AKT3	protein_coding	intronic	243703179	rs72759896	G	A	G	345245	1.00185	0.00794805	0.815881	NA
CVD	DM	1	AKT3	protein_coding	intronic	243703179	rs72759896	G	A	G	36749	0.960167	0.0235285	0.0840612	NA
CVD	Overall	2	HS1BP3	protein_coding	intronic	20767472	rs181981723	T	C	T	381994	0.977262	0.0255593	0.368185	NA
CVD	noDM	2	HS1BP3	protein_coding	intronic	20767472	rs181981723	T	C	T	345245	0.986281	0.0269835	0.608697	NA
CVD	DM	2	HS1BP3	protein_coding	intronic	20767472	rs181981723	T	C	T	36749	0.903448	0.0787946	0.197528	NA
CVD	Overall	2	DNAJC27	protein_coding	3utr,3downstream	25170158	rs139553812	TC	T	TC	381994	0.96988	0.00592673	2.46705e-07	rs1172293(1),rs955856(1),rs955855(1),rs114577122(1),rs1172296(1),rs10179344(1),rs71397454(1),rs1439097(1),rs1439096(1),rs12151737(1),rs1811421(1),rs2241834(1),rs536112017(1),rs12986502(1),rs4665735(1),rs10432684(1),rs7572472(1),rs4643490(1),rs10203353(1),rs2384063(1),rs4233706(1),rs74493154(1),rs114791586(1),rs56784950(1),rs80098057(1),rs4146916(1),rs7593864(1)
CVD	noDM	2	DNAJC27	protein_coding	3utr,3downstream	25170158	rs139553812	TC	T	TC	345245	0.971664	0.00626355	4.44678e-06	NA
CVD	DM	2	DNAJC27	protein_coding	3utr,3downstream	25170158	rs139553812	TC	T	TC	36749	0.95383	0.0183401	0.0099543	NA
CVD	Overall	2	DNAJC27	protein_coding	intronic,non-coding intronic,3downstream	25180474	rs536112017	GA	G	GA	381994	0.964837	0.00806139	8.97759e-06	NA
CVD	noDM	2	DNAJC27	protein_coding	intronic,non-coding intronic,3downstream	25180474	rs536112017	GA	G	GA	345245	0.966004	0.00851585	4.87496e-05	NA
CVD	DM	2	DNAJC27	protein_coding	intronic,non-coding intronic,3downstream	25180474	rs536112017	GA	G	GA	36749	0.954744	0.0250425	0.0644068	NA
CVD	Overall	2	DNAJC27-AS1	antisense	5upstream,non-coding intronic	25194741	rs7593864	A	G	G	381994	0.969999	0.00592101	2.68217e-07	NA
CVD	Overall	2	DNAJC27	protein_coding	5upstream,coding syn	25194741	rs7593864	A	G	G	381994	0.969999	0.00592101	2.68217e-07	NA
CVD	noDM	2	DNAJC27-AS1	antisense	5upstream,non-coding intronic	25194741	rs7593864	A	G	G	345245	0.97167	0.00625759	4.37537e-06	NA
CVD	noDM	2	DNAJC27	protein_coding	5upstream,coding syn	25194741	rs7593864	A	G	G	345245	0.97167	0.00625759	4.37537e-06	NA
CVD	DM	2	DNAJC27-AS1	antisense	5upstream,non-coding intronic	25194741	rs7593864	A	G	G	36749	0.954925	0.0183227	0.0118281	NA
CVD	DM	2	DNAJC27	protein_coding	5upstream,coding syn	25194741	rs7593864	A	G	G	36749	0.954925	0.0183227	0.0118281	NA
CVD	Overall	2	SLC35F6	protein_coding	non-coding intronic,intronic	26990430	rs116561716	A	T	A	381994	0.987777	0.0127579	0.33504	NA
CVD	Overall	2	CENPA	protein_coding	non-coding intronic	26990430	rs116561716	A	T	A	381994	0.987777	0.0127579	0.33504	NA
CVD	noDM	2	SLC35F6	protein_coding	non-coding intronic,intronic	26990430	rs116561716	A	T	A	345245	0.990616	0.0134406	0.483002	NA
CVD	noDM	2	CENPA	protein_coding	non-coding intronic	26990430	rs116561716	A	T	A	345245	0.990616	0.0134406	0.483002	NA
CVD	DM	2	SLC35F6	protein_coding	non-coding intronic,intronic	26990430	rs116561716	A	T	A	36749	0.962368	0.0404338	0.34279	NA
CVD	DM	2	CENPA	protein_coding	non-coding intronic	26990430	rs116561716	A	T	A	36749	0.962368	0.0404338	0.34279	NA
CVD	Overall	2	SLC35F6	protein_coding	non-coding intronic,intronic	26994277	rs828263	G	A	A	381994	1.01253	0.00997235	0.21176	NA
CVD	Overall	2	CENPA	protein_coding	non-coding intronic	26994277	rs828263	G	A	A	381994	1.01253	0.00997235	0.21176	NA
CVD	noDM	2	SLC35F6	protein_coding	non-coding intronic,intronic	26994277	rs828263	G	A	A	345245	1.00578	0.0105442	0.584821	NA
CVD	noDM	2	CENPA	protein_coding	non-coding intronic	26994277	rs828263	G	A	A	345245	1.00578	0.0105442	0.584821	NA
CVD	DM	2	SLC35F6	protein_coding	non-coding intronic,intronic	26994277	rs828263	G	A	A	36749	1.06891	0.031099	0.0321197	NA
CVD	DM	2	CENPA	protein_coding	non-coding intronic	26994277	rs828263	G	A	A	36749	1.06891	0.031099	0.0321197	NA
CVD	Overall	2	CENPA	protein_coding	non-coding intronic	26995082	rs76508715	T	C	T	381994	1.0191	0.0133745	0.157167	NA
CVD	Overall	2	SLC35F6	protein_coding	non-coding intronic,intronic	26995082	rs76508715	T	C	T	381994	1.0191	0.0133745	0.157167	NA
CVD	noDM	2	CENPA	protein_coding	non-coding intronic	26995082	rs76508715	T	C	T	345245	1.00849	0.0141635	0.550707	NA
CVD	noDM	2	SLC35F6	protein_coding	non-coding intronic,intronic	26995082	rs76508715	T	C	T	345245	1.00849	0.0141635	0.550707	NA
CVD	DM	2	CENPA	protein_coding	non-coding intronic	26995082	rs76508715	T	C	T	36749	1.11119	0.0414594	0.0109904	NA
CVD	DM	2	SLC35F6	protein_coding	non-coding intronic,intronic	26995082	rs76508715	T	C	T	36749	1.11119	0.0414594	0.0109904	NA
CVD	Overall	2	SLC35F6	protein_coding	3downstream,3utr	27003021	rs10186142	C	T	C	381994	1.00761	0.00526872	0.149974	NA
CVD	Overall	2	CENPA	protein_coding	non-coding intronic	27003021	rs10186142	C	T	C	381994	1.00761	0.00526872	0.149974	NA
CVD	noDM	2	SLC35F6	protein_coding	3downstream,3utr	27003021	rs10186142	C	T	C	345245	1.00842	0.00556226	0.131869	NA
CVD	noDM	2	CENPA	protein_coding	non-coding intronic	27003021	rs10186142	C	T	C	345245	1.00842	0.00556226	0.131869	NA
CVD	DM	2	SLC35F6	protein_coding	3downstream,3utr	27003021	rs10186142	C	T	C	36749	1.0008	0.0164704	0.961093	NA
CVD	DM	2	CENPA	protein_coding	non-coding intronic	27003021	rs10186142	C	T	C	36749	1.0008	0.0164704	0.961093	NA
CVD	Overall	2	MPV17	protein_coding	non-coding intronic,3downstream,intronic	27533048	rs115371897	T	C	T	381994	0.998487	0.0190529	0.936639	NA
CVD	noDM	2	MPV17	protein_coding	non-coding intronic,3downstream,intronic	27533048	rs115371897	T	C	T	345245	1.00378	0.0200502	0.850638	NA
CVD	DM	2	MPV17	protein_coding	non-coding intronic,3downstream,intronic	27533048	rs115371897	T	C	T	36749	0.956241	0.0607764	0.461596	NA
CVD	Overall	2	MPV17	protein_coding	non-coding intronic,3downstream,intronic	27533116	rs187628677	C	A	C	381994	1.00704	0.0178496	0.694177	NA
CVD	noDM	2	MPV17	protein_coding	non-coding intronic,3downstream,intronic	27533116	rs187628677	C	A	C	345245	0.995739	0.0189337	0.821576	NA
CVD	DM	2	MPV17	protein_coding	non-coding intronic,3downstream,intronic	27533116	rs187628677	C	A	C	36749	1.10599	0.0546793	0.0654243	NA
CVD	Overall	2	MPV17	protein_coding	3utr,non-coding intronic,intronic,3downstream	27538635	rs35686293	A	G	A	381994	1.02987	0.0112435	0.00885606	NA
CVD	noDM	2	MPV17	protein_coding	3utr,non-coding intronic,intronic,3downstream	27538635	rs35686293	A	G	A	345245	1.03378	0.0118507	0.00505432	NA
CVD	DM	2	MPV17	protein_coding	3utr,non-coding intronic,intronic,3downstream	27538635	rs35686293	A	G	A	36749	0.995176	0.0354598	0.891538	NA
CVD	Overall	2	MPV17	protein_coding	3downstream,non-coding intronic,intronic	27543209	rs145680464	AT	A	AT	381994	0.99326	0.00838664	0.420014	NA
CVD	noDM	2	MPV17	protein_coding	3downstream,non-coding intronic,intronic	27543209	rs145680464	AT	A	AT	345245	0.991339	0.00886624	0.326513	NA
CVD	DM	2	MPV17	protein_coding	3downstream,non-coding intronic,intronic	27543209	rs145680464	AT	A	AT	36749	1.00901	0.0259799	0.729858	NA
CVD	Overall	2	MPV17	protein_coding	3downstream,non-coding intronic,intronic	27544094	rs73924414	A	G	A	381994	0.995861	0.0131793	0.752981	NA
CVD	noDM	2	MPV17	protein_coding	3downstream,non-coding intronic,intronic	27544094	rs73924414	A	G	A	345245	0.992202	0.0139275	0.57404	NA
CVD	DM	2	MPV17	protein_coding	3downstream,non-coding intronic,intronic	27544094	rs73924414	A	G	A	36749	1.02534	0.0410996	0.542621	NA
CVD	Overall	2	MPV17	protein_coding	non-coding intronic,intronic,3downstream	27544713	rs189682050	C	A	C	381994	1.00519	0.0228005	0.820467	NA
CVD	noDM	2	MPV17	protein_coding	non-coding intronic,intronic,3downstream	27544713	rs189682050	C	A	C	345245	1.00555	0.0240538	0.817932	NA
CVD	DM	2	MPV17	protein_coding	non-coding intronic,intronic,3downstream	27544713	rs189682050	C	A	C	36749	1.0024	0.0717221	0.973336	NA
CVD	Overall	2	GCKR	protein_coding	3downstream,intronic,non-coding intronic	27724535	rs8179210	G	C	G	381994	0.995835	0.0180741	0.817387	NA
CVD	noDM	2	GCKR	protein_coding	3downstream,intronic,non-coding intronic	27724535	rs8179210	G	C	G	345245	0.995237	0.0190508	0.802124	NA
CVD	DM	2	GCKR	protein_coding	3downstream,intronic,non-coding intronic	27724535	rs8179210	G	C	G	36749	1.00311	0.0574031	0.956795	NA
CVD	Overall	2	GCKR	protein_coding	3downstream,non-coding,coding nonsyn	27730940	rs1260326	C	T	T	381994	1.01428	0.00513624	0.00577868	NA
CVD	noDM	2	GCKR	protein_coding	3downstream,non-coding,coding nonsyn	27730940	rs1260326	C	T	T	345245	1.01894	0.00542076	0.000538369	NA
CVD	DM	2	GCKR	protein_coding	3downstream,non-coding,coding nonsyn	27730940	rs1260326	C	T	T	36749	0.977311	0.0160846	0.153624	NA
CVD	Overall	2	GCKR	protein_coding	3downstream,intronic	27732845	rs116361102	A	G	A	381994	0.990616	0.0158214	0.55122	NA
CVD	noDM	2	GCKR	protein_coding	3downstream,intronic	27732845	rs116361102	A	G	A	345245	0.99205	0.0166779	0.632257	NA
CVD	DM	2	GCKR	protein_coding	3downstream,intronic	27732845	rs116361102	A	G	A	36749	0.982019	0.0500166	0.716781	NA
CVD	Overall	2	GCKR	protein_coding	intronic	27735033	rs141428740	A	G	A	381994	1.02171	0.0108926	0.0486428	NA
CVD	noDM	2	GCKR	protein_coding	intronic	27735033	rs141428740	A	G	A	345245	1.02688	0.0114799	0.0208481	NA
CVD	DM	2	GCKR	protein_coding	intronic	27735033	rs141428740	A	G	A	36749	0.975605	0.0343141	0.471677	NA
CVD	Overall	2	GCKR	protein_coding	intronic	27739306	rs12472643	T	C	T	381994	0.982241	0.00873401	0.0402138	NA
CVD	noDM	2	GCKR	protein_coding	intronic	27739306	rs12472643	T	C	T	345245	0.980353	0.00922525	0.0314842	NA
CVD	DM	2	GCKR	protein_coding	intronic	27739306	rs12472643	T	C	T	36749	0.994996	0.0272747	0.854073	NA
CVD	Overall	2	GCKR	protein_coding	intronic	27745828	rs111882222	T	C	T	381994	0.96181	0.0179174	0.0297651	NA
CVD	noDM	2	GCKR	protein_coding	intronic	27745828	rs111882222	T	C	T	345245	0.958396	0.0189615	0.0250199	NA
CVD	DM	2	GCKR	protein_coding	intronic	27745828	rs111882222	T	C	T	36749	0.990715	0.0552367	0.865891	NA
CVD	Overall	2	GPN1	protein_coding	intronic,3downstream,non-coding intronic	27855397	rs10173720	T	A	T	381994	1.00614	0.00609625	0.315088	NA
CVD	Overall	2	RP11-158I13.2	processed_transcript	non-coding intronic	27855397	rs10173720	T	A	T	381994	1.00614	0.00609625	0.315088	NA
CVD	Overall	2	ZNF512	protein_coding	intronic	27855397	rs10173720	T	A	T	381994	1.00614	0.00609625	0.315088	NA
CVD	noDM	2	GPN1	protein_coding	intronic,3downstream,non-coding intronic	27855397	rs10173720	T	A	T	345245	1.00512	0.00644184	0.427931	NA
CVD	noDM	2	RP11-158I13.2	processed_transcript	non-coding intronic	27855397	rs10173720	T	A	T	345245	1.00512	0.00644184	0.427931	NA
CVD	noDM	2	ZNF512	protein_coding	intronic	27855397	rs10173720	T	A	T	345245	1.00512	0.00644184	0.427931	NA
CVD	DM	2	GPN1	protein_coding	intronic,3downstream,non-coding intronic	27855397	rs10173720	T	A	T	36749	1.01326	0.018932	0.486462	NA
CVD	DM	2	RP11-158I13.2	processed_transcript	non-coding intronic	27855397	rs10173720	T	A	T	36749	1.01326	0.018932	0.486462	NA
CVD	DM	2	ZNF512	protein_coding	intronic	27855397	rs10173720	T	A	T	36749	1.01326	0.018932	0.486462	NA
CVD	Overall	2	GPN1	protein_coding	3downstream,3utr	27873326	rs8731	G	C	G	381994	1.0061	0.00609856	0.318293	NA
CVD	noDM	2	GPN1	protein_coding	3downstream,3utr	27873326	rs8731	G	C	G	345245	1.00496	0.00644403	0.442177	NA
CVD	DM	2	GPN1	protein_coding	3downstream,3utr	27873326	rs8731	G	C	G	36749	1.01431	0.0189478	0.453402	NA
CVD	Overall	2	MRPL33	protein_coding	5utr,5upstream	27994597	rs34796799	T	G	T	381994	1.00291	0.0136847	0.831778	NA
CVD	noDM	2	MRPL33	protein_coding	5utr,5upstream	27994597	rs34796799	T	G	T	345245	1.00281	0.014459	0.84621	NA
CVD	DM	2	MRPL33	protein_coding	5utr,5upstream	27994597	rs34796799	T	G	T	36749	1.00308	0.042511	0.94226	NA
CVD	Overall	2	AC110084.1	protein_coding	intronic	28001745	rs77829337	A	G	A	381994	1.01991	0.0252432	0.434847	NA
CVD	Overall	2	MRPL33	protein_coding	non-coding intronic,intronic	28001745	rs77829337	A	G	A	381994	1.01991	0.0252432	0.434847	NA
CVD	noDM	2	AC110084.1	protein_coding	intronic	28001745	rs77829337	A	G	A	345245	1.03484	0.0265798	0.197582	NA
CVD	noDM	2	MRPL33	protein_coding	non-coding intronic,intronic	28001745	rs77829337	A	G	A	345245	1.03484	0.0265798	0.197582	NA
CVD	DM	2	AC110084.1	protein_coding	intronic	28001745	rs77829337	A	G	A	36749	0.901599	0.0789597	0.189559	NA
CVD	DM	2	MRPL33	protein_coding	non-coding intronic,intronic	28001745	rs77829337	A	G	A	36749	0.901599	0.0789597	0.189559	NA
CVD	Overall	2	RBKS	protein_coding	intronic	28017486	rs565509271	C	T	C	381994	0.977104	0.0229271	0.312371	NA
CVD	Overall	2	MRPL33	protein_coding	intronic	28017486	rs565509271	C	T	C	381994	0.977104	0.0229271	0.312371	NA
CVD	noDM	2	RBKS	protein_coding	intronic	28017486	rs565509271	C	T	C	345245	0.967776	0.0242722	0.177179	NA
CVD	noDM	2	MRPL33	protein_coding	intronic	28017486	rs565509271	C	T	C	345245	0.967776	0.0242722	0.177179	NA
CVD	DM	2	RBKS	protein_coding	intronic	28017486	rs565509271	C	T	C	36749	1.05521	0.0710916	0.44967	NA
CVD	DM	2	MRPL33	protein_coding	intronic	28017486	rs565509271	C	T	C	36749	1.05521	0.0710916	0.44967	NA
CVD	Overall	2	RBKS	protein_coding	3downstream,intronic	28030735	rs114031902	G	A	G	381994	1.02392	0.0188208	0.209148	NA
CVD	Overall	2	MRPL33	protein_coding	intronic	28030735	rs114031902	G	A	G	381994	1.02392	0.0188208	0.209148	NA
CVD	noDM	2	RBKS	protein_coding	3downstream,intronic	28030735	rs114031902	G	A	G	345245	1.0208	0.0199005	0.300994	NA
CVD	noDM	2	MRPL33	protein_coding	intronic	28030735	rs114031902	G	A	G	345245	1.0208	0.0199005	0.300994	NA
CVD	DM	2	RBKS	protein_coding	3downstream,intronic	28030735	rs114031902	G	A	G	36749	1.0497	0.058376	0.406075	NA
CVD	DM	2	MRPL33	protein_coding	intronic	28030735	rs114031902	G	A	G	36749	1.0497	0.058376	0.406075	NA
CVD	Overall	2	MRPL33	protein_coding	intronic	28031825	rs75446579	C	G	C	381994	1.02265	0.0200355	0.263661	NA
CVD	Overall	2	RBKS	protein_coding	3downstream,intronic	28031825	rs75446579	C	G	C	381994	1.02265	0.0200355	0.263661	NA
CVD	noDM	2	MRPL33	protein_coding	intronic	28031825	rs75446579	C	G	C	345245	1.02314	0.021175	0.280001	NA
CVD	noDM	2	RBKS	protein_coding	3downstream,intronic	28031825	rs75446579	C	G	C	345245	1.02314	0.021175	0.280001	NA
CVD	DM	2	MRPL33	protein_coding	intronic	28031825	rs75446579	C	G	C	36749	1.01738	0.0620511	0.781201	NA
CVD	DM	2	RBKS	protein_coding	3downstream,intronic	28031825	rs75446579	C	G	C	36749	1.01738	0.0620511	0.781201	NA
CVD	Overall	2	MRPL33	protein_coding	intronic	28037815	rs142921279	TA	T	TA	381994	0.997928	0.0182619	0.909576	NA
CVD	Overall	2	RBKS	protein_coding	intronic	28037815	rs142921279	TA	T	TA	381994	0.997928	0.0182619	0.909576	NA
CVD	noDM	2	MRPL33	protein_coding	intronic	28037815	rs142921279	TA	T	TA	345245	0.996211	0.0193336	0.844331	NA
CVD	noDM	2	RBKS	protein_coding	intronic	28037815	rs142921279	TA	T	TA	345245	0.996211	0.0193336	0.844331	NA
CVD	DM	2	MRPL33	protein_coding	intronic	28037815	rs142921279	TA	T	TA	36749	1.01007	0.0559051	0.857816	NA
CVD	DM	2	RBKS	protein_coding	intronic	28037815	rs142921279	TA	T	TA	36749	1.01007	0.0559051	0.857816	NA
CVD	Overall	2	RBKS	protein_coding	intronic	28039665	rs4465729	C	T	C	381994	1.01855	0.00506582	0.000284618	NA
CVD	Overall	2	MRPL33	protein_coding	intronic	28039665	rs4465729	C	T	C	381994	1.01855	0.00506582	0.000284618	NA
CVD	noDM	2	RBKS	protein_coding	intronic	28039665	rs4465729	C	T	C	345245	1.02075	0.00534794	0.000123127	NA
CVD	noDM	2	MRPL33	protein_coding	intronic	28039665	rs4465729	C	T	C	345245	1.02075	0.00534794	0.000123127	NA
CVD	DM	2	RBKS	protein_coding	intronic	28039665	rs4465729	C	T	C	36749	0.999274	0.0158397	0.963405	NA
CVD	DM	2	MRPL33	protein_coding	intronic	28039665	rs4465729	C	T	C	36749	0.999274	0.0158397	0.963405	NA
CVD	Overall	2	MRPL33	protein_coding	intronic	28043391	rs74994332	C	T	C	381994	0.979452	0.0135343	0.125024	NA
CVD	Overall	2	RBKS	protein_coding	intronic	28043391	rs74994332	C	T	C	381994	0.979452	0.0135343	0.125024	NA
CVD	noDM	2	MRPL33	protein_coding	intronic	28043391	rs74994332	C	T	C	345245	0.973073	0.0143361	0.0569028	NA
CVD	noDM	2	RBKS	protein_coding	intronic	28043391	rs74994332	C	T	C	345245	0.973073	0.0143361	0.0569028	NA
CVD	DM	2	MRPL33	protein_coding	intronic	28043391	rs74994332	C	T	C	36749	1.03869	0.0416078	0.361566	NA
CVD	DM	2	RBKS	protein_coding	intronic	28043391	rs74994332	C	T	C	36749	1.03869	0.0416078	0.361566	NA
CVD	Overall	2	RBKS	protein_coding	intronic	28049020	rs56242350	G	A	G	381994	0.998307	0.0181592	0.925643	NA
CVD	Overall	2	MRPL33	protein_coding	intronic	28049020	rs56242350	G	A	G	381994	0.998307	0.0181592	0.925643	NA
CVD	noDM	2	RBKS	protein_coding	intronic	28049020	rs56242350	G	A	G	345245	0.996851	0.0192266	0.869712	NA
CVD	noDM	2	MRPL33	protein_coding	intronic	28049020	rs56242350	G	A	G	345245	0.996851	0.0192266	0.869712	NA
CVD	DM	2	RBKS	protein_coding	intronic	28049020	rs56242350	G	A	G	36749	1.00828	0.055529	0.881902	NA
CVD	DM	2	MRPL33	protein_coding	intronic	28049020	rs56242350	G	A	G	36749	1.00828	0.055529	0.881902	NA
CVD	Overall	2	RBKS	protein_coding	intronic	28065344	rs114225310	A	G	A	381994	0.997241	0.0165211	0.867184	NA
CVD	Overall	2	MRPL33	protein_coding	intronic	28065344	rs114225310	A	G	A	381994	0.997241	0.0165211	0.867184	NA
CVD	noDM	2	RBKS	protein_coding	intronic	28065344	rs114225310	A	G	A	345245	0.991221	0.0174543	0.613439	NA
CVD	noDM	2	MRPL33	protein_coding	intronic	28065344	rs114225310	A	G	A	345245	0.991221	0.0174543	0.613439	NA
CVD	DM	2	RBKS	protein_coding	intronic	28065344	rs114225310	A	G	A	36749	1.04881	0.0518564	0.358046	NA
CVD	DM	2	MRPL33	protein_coding	intronic	28065344	rs114225310	A	G	A	36749	1.04881	0.0518564	0.358046	NA
CVD	Overall	2	MRPL33	protein_coding	intronic	28090343	rs76414065	C	A	C	381994	0.998058	0.0160232	0.903435	NA
CVD	Overall	2	RBKS	protein_coding	intronic	28090343	rs76414065	C	A	C	381994	0.998058	0.0160232	0.903435	NA
CVD	noDM	2	MRPL33	protein_coding	intronic	28090343	rs76414065	C	A	C	345245	0.990378	0.0169273	0.567886	NA
CVD	noDM	2	RBKS	protein_coding	intronic	28090343	rs76414065	C	A	C	345245	0.990378	0.0169273	0.567886	NA
CVD	DM	2	MRPL33	protein_coding	intronic	28090343	rs76414065	C	A	C	36749	1.06567	0.0504765	0.207668	NA
CVD	DM	2	RBKS	protein_coding	intronic	28090343	rs76414065	C	A	C	36749	1.06567	0.0504765	0.207668	NA
CVD	Overall	2	RBKS	protein_coding	intronic	28100166	rs182760615	G	C	G	381994	1.00611	0.0180949	0.73647	NA
CVD	Overall	2	MRPL33	protein_coding	intronic	28100166	rs182760615	G	C	G	381994	1.00611	0.0180949	0.73647	NA
CVD	noDM	2	RBKS	protein_coding	intronic	28100166	rs182760615	G	C	G	345245	1.01133	0.0190943	0.555165	NA
CVD	noDM	2	MRPL33	protein_coding	intronic	28100166	rs182760615	G	C	G	345245	1.01133	0.0190943	0.555165	NA
CVD	DM	2	RBKS	protein_coding	intronic	28100166	rs182760615	G	C	G	36749	0.962127	0.056325	0.493053	NA
CVD	DM	2	MRPL33	protein_coding	intronic	28100166	rs182760615	G	C	G	36749	0.962127	0.056325	0.493053	NA
CVD	Overall	2	MRPL33	protein_coding	intronic	28102495	rs77841344	A	G	A	381994	1.04415	0.020129	0.0318549	NA
CVD	Overall	2	RBKS	protein_coding	intronic	28102495	rs77841344	A	G	A	381994	1.04415	0.020129	0.0318549	NA
CVD	noDM	2	MRPL33	protein_coding	intronic	28102495	rs77841344	A	G	A	345245	1.05875	0.0211668	0.00699681	NA
CVD	noDM	2	RBKS	protein_coding	intronic	28102495	rs77841344	A	G	A	345245	1.05875	0.0211668	0.00699681	NA
CVD	DM	2	MRPL33	protein_coding	intronic	28102495	rs77841344	A	G	A	36749	0.922956	0.0638021	0.208899	NA
CVD	DM	2	RBKS	protein_coding	intronic	28102495	rs77841344	A	G	A	36749	0.922956	0.0638021	0.208899	NA
CVD	Overall	2	BRE	protein_coding	intronic,5upstream,non-coding intronic	28116885	rs541694097	G	A	G	381994	1.06425	0.0219246	0.00451004	NA
CVD	Overall	2	MRPL33	protein_coding	intronic	28116885	rs541694097	G	A	G	381994	1.06425	0.0219246	0.00451004	NA
CVD	noDM	2	BRE	protein_coding	intronic,5upstream,non-coding intronic	28116885	rs541694097	G	A	G	345245	1.07129	0.0230559	0.00281993	NA
CVD	noDM	2	MRPL33	protein_coding	intronic	28116885	rs541694097	G	A	G	345245	1.07129	0.0230559	0.00281993	NA
CVD	DM	2	BRE	protein_coding	intronic,5upstream,non-coding intronic	28116885	rs541694097	G	A	G	36749	0.999032	0.0700944	0.988976	NA
CVD	DM	2	MRPL33	protein_coding	intronic	28116885	rs541694097	G	A	G	36749	0.999032	0.0700944	0.988976	NA
CVD	Overall	2	MRPL33	protein_coding	intronic	28128426	rs72810578	A	G	A	381994	0.987855	0.0160997	0.447865	NA
CVD	Overall	2	BRE	protein_coding	intronic,non-coding intronic	28128426	rs72810578	A	G	A	381994	0.987855	0.0160997	0.447865	NA
CVD	noDM	2	MRPL33	protein_coding	intronic	28128426	rs72810578	A	G	A	345245	0.98472	0.0170038	0.36518	NA
CVD	noDM	2	BRE	protein_coding	intronic,non-coding intronic	28128426	rs72810578	A	G	A	345245	0.98472	0.0170038	0.36518	NA
CVD	DM	2	MRPL33	protein_coding	intronic	28128426	rs72810578	A	G	A	36749	1.01348	0.0504584	0.790716	NA
CVD	DM	2	BRE	protein_coding	intronic,non-coding intronic	28128426	rs72810578	A	G	A	36749	1.01348	0.0504584	0.790716	NA
CVD	Overall	2	BRE	protein_coding	intronic,non-coding intronic	28128711	rs115682245	T	C	T	381994	1.00852	0.0178791	0.634952	NA
CVD	Overall	2	MRPL33	protein_coding	intronic	28128711	rs115682245	T	C	T	381994	1.00852	0.0178791	0.634952	NA
CVD	noDM	2	BRE	protein_coding	intronic,non-coding intronic	28128711	rs115682245	T	C	T	345245	1.01391	0.0188064	0.462524	NA
CVD	noDM	2	MRPL33	protein_coding	intronic	28128711	rs115682245	T	C	T	345245	1.01391	0.0188064	0.462524	NA
CVD	DM	2	BRE	protein_coding	intronic,non-coding intronic	28128711	rs115682245	T	C	T	36749	0.965976	0.0572435	0.545362	NA
CVD	DM	2	MRPL33	protein_coding	intronic	28128711	rs115682245	T	C	T	36749	0.965976	0.0572435	0.545362	NA
CVD	Overall	2	MRPL33	protein_coding	intronic	28136911	rs116769126	A	G	A	381994	0.982904	0.0114631	0.132502	NA
CVD	Overall	2	BRE	protein_coding	intronic,non-coding intronic	28136911	rs116769126	A	G	A	381994	0.982904	0.0114631	0.132502	NA
CVD	noDM	2	MRPL33	protein_coding	intronic	28136911	rs116769126	A	G	A	345245	0.984891	0.0120948	0.208107	NA
CVD	noDM	2	BRE	protein_coding	intronic,non-coding intronic	28136911	rs116769126	A	G	A	345245	0.984891	0.0120948	0.208107	NA
CVD	DM	2	MRPL33	protein_coding	intronic	28136911	rs116769126	A	G	A	36749	0.966543	0.0359341	0.343645	NA
CVD	DM	2	BRE	protein_coding	intronic,non-coding intronic	28136911	rs116769126	A	G	A	36749	0.966543	0.0359341	0.343645	NA
CVD	Overall	2	BRE	protein_coding	non-coding intronic,intronic	28165568	rs147417158	G	T	G	381994	1.02445	0.0257255	0.347816	NA
CVD	Overall	2	MRPL33	protein_coding	intronic	28165568	rs147417158	G	T	G	381994	1.02445	0.0257255	0.347816	NA
CVD	noDM	2	BRE	protein_coding	non-coding intronic,intronic	28165568	rs147417158	G	T	G	345245	1.00873	0.0272495	0.74967	NA
CVD	noDM	2	MRPL33	protein_coding	intronic	28165568	rs147417158	G	T	G	345245	1.00873	0.0272495	0.74967	NA
CVD	DM	2	BRE	protein_coding	non-coding intronic,intronic	28165568	rs147417158	G	T	G	36749	1.16521	0.0802618	0.056782	NA
CVD	DM	2	MRPL33	protein_coding	intronic	28165568	rs147417158	G	T	G	36749	1.16521	0.0802618	0.056782	NA
CVD	Overall	2	MRPL33	protein_coding	intronic	28187137	rs56410752	T	C	T	381994	0.992077	0.00559735	0.155272	NA
CVD	Overall	2	BRE	protein_coding	intronic,non-coding intronic	28187137	rs56410752	T	C	T	381994	0.992077	0.00559735	0.155272	NA
CVD	noDM	2	MRPL33	protein_coding	intronic	28187137	rs56410752	T	C	T	345245	0.992939	0.00590866	0.230408	NA
CVD	noDM	2	BRE	protein_coding	intronic,non-coding intronic	28187137	rs56410752	T	C	T	345245	0.992939	0.00590866	0.230408	NA
CVD	DM	2	MRPL33	protein_coding	intronic	28187137	rs56410752	T	C	T	36749	0.984736	0.0175061	0.379608	NA
CVD	DM	2	BRE	protein_coding	intronic,non-coding intronic	28187137	rs56410752	T	C	T	36749	0.984736	0.0175061	0.379608	NA
CVD	Overall	2	MRPL33	protein_coding	intronic	28189637	rs145482534	T	G	T	381994	0.985211	0.0130063	0.251964	NA
CVD	Overall	2	BRE	protein_coding	intronic,non-coding intronic	28189637	rs145482534	T	G	T	381994	0.985211	0.0130063	0.251964	NA
CVD	noDM	2	MRPL33	protein_coding	intronic	28189637	rs145482534	T	G	T	345245	0.9808	0.0137161	0.157524	NA
CVD	noDM	2	BRE	protein_coding	intronic,non-coding intronic	28189637	rs145482534	T	G	T	345245	0.9808	0.0137161	0.157524	NA
CVD	DM	2	MRPL33	protein_coding	intronic	28189637	rs145482534	T	G	T	36749	1.02751	0.0413785	0.511873	NA
CVD	DM	2	BRE	protein_coding	intronic,non-coding intronic	28189637	rs145482534	T	G	T	36749	1.02751	0.0413785	0.511873	NA
CVD	Overall	2	TRMT61B	protein_coding	intronic	29088338	rs10179580	G	T	T	381994	1.00611	0.00503887	0.226373	NA
CVD	noDM	2	TRMT61B	protein_coding	intronic	29088338	rs10179580	G	T	T	345245	1.00569	0.00532267	0.28666	NA
CVD	DM	2	TRMT61B	protein_coding	intronic	29088338	rs10179580	G	T	T	36749	1.0099	0.0156829	0.529805	NA
CVD	Overall	2	TTC27	protein_coding	intronic	32937346	rs74261852	A	G	A	381994	1.04452	0.010028	1.40077e-05	NA
CVD	noDM	2	TTC27	protein_coding	intronic	32937346	rs74261852	A	G	A	345245	1.05595	0.0105683	2.58256e-07	rs2568465(1),rs4952344(1),rs4952345(1),rs2710605(1),rs1971205(1),rs75949879(1),rs2568466(1),rs2754526(1),rs2710624(1),rs6757767(1),rs17012046(1),rs71446076(1),rs71446077(1),rs13016481(1),rs2163664(1),rs151264015(1),rs190480896(1),rs182713132(1),rs76828096(1),rs1807918(1),2:32892036_GT_G(1),rs76177886(1),rs116073612(1),rs2295728(1),rs2295731(1),rs76706280(1),rs116115559(1),rs77579348(1),rs7594173(…
CVD	DM	2	TTC27	protein_coding	intronic	32937346	rs74261852	A	G	A	36749	0.951134	0.031314	0.109611	NA
CVD	Overall	2	NDUFAF7	protein_coding	non-coding intronic,intronic	37463620	rs2430494	T	G	G	381994	1.02867	0.00515261	4.10664e-08	rs2465488(1),rs2540973(1),rs2540972(1),rs2465489(1),rs2160391(1),rs10779921(1),rs2430490(1),rs2714474(1),rs2372888(1),rs7602924(1),rs9973852(1),rs12712528(1),rs6743961(1),rs2540977(1),rs146636681(1),rs13409250(1),rs1861444(1),rs7560904(1),rs7601628(1),rs12622740(1),rs34196749(1),rs2041840(1),rs2041837(1),rs7579990(1),rs2110965(1),rs759461(1),rs12712529(1),rs4670679(1),rs574919857(1),rs56059847(1)…
CVD	noDM	2	NDUFAF7	protein_coding	non-coding intronic,intronic	37463620	rs2430494	T	G	G	345245	1.02843	0.00543951	2.5624e-07	rs2465488(1),rs2540973(1),rs2540972(1),rs2465489(1),rs2160391(1),rs10779921(1),rs2430490(1),rs2714474(1),rs2372888(1),rs7602924(1),rs9973852(1),rs12712528(1),rs6743961(1),rs2540977(1),rs146636681(1),rs13409250(1),rs1861444(1),rs7560904(1),rs7601628(1),rs12622740(1),rs34196749(1),rs2041840(1),rs2041837(1),rs7579990(1),rs2110965(1),rs759461(1),rs12712529(1),rs4670679(1),rs574919857(1),rs56059847(1)…
CVD	DM	2	NDUFAF7	protein_coding	non-coding intronic,intronic	37463620	rs2430494	T	G	G	36749	1.03072	0.0161217	0.0605678	NA
CVD	Overall	2	NDUFAF7	protein_coding	intronic,3downstream	37476688	rs56059847	G	C	G	381994	0.971365	0.00690112	2.55459e-05	NA
CVD	noDM	2	NDUFAF7	protein_coding	intronic,3downstream	37476688	rs56059847	G	C	G	345245	0.969548	0.00728719	2.19748e-05	NA
CVD	DM	2	NDUFAF7	protein_coding	intronic,3downstream	37476688	rs56059847	G	C	G	36749	0.986437	0.0215983	0.527212	NA
CVD	Overall	2	NDUFAF7	protein_coding	intronic,3downstream	37477169	rs374474201	AT	A	AT	381994	0.977888	0.0089673	0.0126496	NA
CVD	noDM	2	NDUFAF7	protein_coding	intronic,3downstream	37477169	rs374474201	AT	A	AT	345245	0.980198	0.00946751	0.0346399	NA
CVD	DM	2	NDUFAF7	protein_coding	intronic,3downstream	37477169	rs374474201	AT	A	AT	36749	0.957948	0.0279462	0.124214	NA
CVD	Overall	2	SLC8A1	protein_coding	intronic	40577162	rs12611608	C	G	C	381994	0.989463	0.00504217	0.035645	NA
CVD	noDM	2	SLC8A1	protein_coding	intronic	40577162	rs12611608	C	G	C	345245	0.986864	0.00532295	0.012988	NA
CVD	DM	2	SLC8A1	protein_coding	intronic	40577162	rs12611608	C	G	C	36749	1.01246	0.0157785	0.432722	NA
CVD	Overall	2	SLC8A1	protein_coding	intronic	40578036	rs12989852	A	G	A	381994	0.992464	0.00511929	0.139502	NA
CVD	noDM	2	SLC8A1	protein_coding	intronic	40578036	rs12989852	A	G	A	345245	0.988555	0.00540576	0.0332213	NA
CVD	DM	2	SLC8A1	protein_coding	intronic	40578036	rs12989852	A	G	A	36749	1.02748	0.0160005	0.0902596	NA
CVD	Overall	2	LRPPRC	protein_coding	intronic,non-coding intronic	44125185	rs17031754	A	T	A	381994	1.00981	0.00724266	0.17754	NA
CVD	noDM	2	LRPPRC	protein_coding	intronic,non-coding intronic	44125185	rs17031754	A	T	A	345245	1.0099	0.00763997	0.197214	NA
CVD	DM	2	LRPPRC	protein_coding	intronic,non-coding intronic	44125185	rs17031754	A	T	A	36749	1.00952	0.0228109	0.677764	NA
CVD	Overall	2	LRPPRC	protein_coding	intronic	44166222	rs192596395	C	T	C	381994	1.02314	0.01627	0.159645	NA
CVD	noDM	2	LRPPRC	protein_coding	intronic	44166222	rs192596395	C	T	C	345245	1.02489	0.0171608	0.151968	NA
CVD	DM	2	LRPPRC	protein_coding	intronic	44166222	rs192596395	C	T	C	36749	1.01237	0.0511611	0.810128	NA
CVD	Overall	2	LRPPRC	protein_coding	intronic	44216369	rs115933697	A	T	A	381994	1.00897	0.014318	0.532836	NA
CVD	noDM	2	LRPPRC	protein_coding	intronic	44216369	rs115933697	A	T	A	345245	1.0117	0.0151048	0.441095	NA
CVD	DM	2	LRPPRC	protein_coding	intronic	44216369	rs115933697	A	T	A	36749	0.989757	0.0448672	0.818505	NA
CVD	Overall	2	PREPL	protein_coding	intronic,non-coding intronic	44576049	rs72804944	A	T	A	381994	1.01545	0.0197731	0.438102	NA
CVD	noDM	2	PREPL	protein_coding	intronic,non-coding intronic	44576049	rs72804944	A	T	A	345245	1.0157	0.020889	0.45583	NA
CVD	DM	2	PREPL	protein_coding	intronic,non-coding intronic	44576049	rs72804944	A	T	A	36749	1.0162	0.0614933	0.793854	NA
CVD	Overall	2	PRKCE	protein_coding	5utr,5upstream	45878760	rs687914	T	G	T	381994	1.02625	0.00580685	8.08212e-06	NA
CVD	noDM	2	PRKCE	protein_coding	5utr,5upstream	45878760	rs687914	T	G	T	345245	1.02749	0.00612841	9.6496e-06	NA
CVD	DM	2	PRKCE	protein_coding	5utr,5upstream	45878760	rs687914	T	G	T	36749	1.01554	0.0181886	0.396524	NA
CVD	Overall	2	PRKCE	protein_coding	non-coding intronic,intronic	45883832	rs56104374	G	A	G	381994	0.97552	0.00842173	0.0032511	NA
CVD	noDM	2	PRKCE	protein_coding	non-coding intronic,intronic	45883832	rs56104374	G	A	G	345245	0.972438	0.00890021	0.00168798	NA
CVD	DM	2	PRKCE	protein_coding	non-coding intronic,intronic	45883832	rs56104374	G	A	G	36749	1.00469	0.0262303	0.858445	NA
CVD	Overall	2	PRKCE	protein_coding	intronic,non-coding intronic	45905193	rs513386	T	A	T	381994	1.01403	0.00560371	0.0129393	NA
CVD	noDM	2	PRKCE	protein_coding	intronic,non-coding intronic	45905193	rs513386	T	A	T	345245	1.01465	0.00591398	0.0139456	NA
CVD	DM	2	PRKCE	protein_coding	intronic,non-coding intronic	45905193	rs513386	T	A	T	36749	1.00806	0.0175687	0.647577	NA
CVD	Overall	2	PRKCE	protein_coding	non-coding intronic,intronic	46355051	rs4953318	C	A	C	381994	0.994792	0.0052287	0.318	NA
CVD	noDM	2	PRKCE	protein_coding	non-coding intronic,intronic	46355051	rs4953318	C	A	C	345245	0.994724	0.005523	0.338177	NA
CVD	DM	2	PRKCE	protein_coding	non-coding intronic,intronic	46355051	rs4953318	C	A	C	36749	0.995526	0.0162801	0.782982	NA
CVD	Overall	2	EML6	protein_coding	non-coding intronic,intronic	55179006	rs7566508	A	C	C	381994	0.997234	0.00512111	0.58862	NA
CVD	noDM	2	EML6	protein_coding	non-coding intronic,intronic	55179006	rs7566508	A	C	C	345245	0.996812	0.00540616	0.554713	NA
CVD	DM	2	EML6	protein_coding	non-coding intronic,intronic	55179006	rs7566508	A	C	C	36749	0.99945	0.0160267	0.97261	NA
CVD	Overall	2	EML6	protein_coding	intronic,5upstream,non-coding intronic	55179365	rs7569471	T	C	C	381994	0.997518	0.00512111	0.627496	NA
CVD	noDM	2	EML6	protein_coding	intronic,5upstream,non-coding intronic	55179365	rs7569471	T	C	C	345245	0.997072	0.00540624	0.587551	NA
CVD	DM	2	EML6	protein_coding	intronic,5upstream,non-coding intronic	55179365	rs7569471	T	C	C	36749	0.999974	0.0160243	0.998697	NA
CVD	Overall	2	PNPT1	protein_coding	intronic	55888612	rs7596377	A	T	A	381994	0.98261	0.0051468	0.000652931	NA
CVD	noDM	2	PNPT1	protein_coding	intronic	55888612	rs7596377	A	T	A	345245	0.982201	0.00543849	0.000959116	NA
CVD	DM	2	PNPT1	protein_coding	intronic	55888612	rs7596377	A	T	A	36749	0.985795	0.0159772	0.370542	NA
CVD	Overall	2	VRK2	protein_coding	non-coding intronic,intronic	58175242	rs72808468	A	G	A	381994	1.01371	0.00990967	0.169316	NA
CVD	noDM	2	VRK2	protein_coding	non-coding intronic,intronic	58175242	rs72808468	A	G	A	345245	1.00506	0.0104687	0.629886	NA
CVD	DM	2	VRK2	protein_coding	non-coding intronic,intronic	58175242	rs72808468	A	G	A	36749	1.09196	0.0312451	0.00486962	NA
CVD	Overall	2	VRK2	protein_coding	non-coding intronic,intronic	58223236	rs72808494	A	G	A	381994	1.0281	0.00855868	0.00120574	NA
CVD	noDM	2	VRK2	protein_coding	non-coding intronic,intronic	58223236	rs72808494	A	G	A	345245	1.01839	0.00903251	0.0436644	NA
CVD	DM	2	VRK2	protein_coding	non-coding intronic,intronic	58223236	rs72808494	A	G	A	36749	1.11844	0.0272299	3.94438e-05	NA
CVD	Overall	2	VRK2	protein_coding	non-coding intronic,intronic	58228826	rs115659806	A	G	A	381994	1.02828	0.00870421	0.0013548	NA
CVD	noDM	2	VRK2	protein_coding	non-coding intronic,intronic	58228826	rs115659806	A	G	A	345245	1.01801	0.00918537	0.0520067	NA
CVD	DM	2	VRK2	protein_coding	non-coding intronic,intronic	58228826	rs115659806	A	G	A	36749	1.12385	0.0277384	2.56129e-05	NA
CVD	Overall	2	RAB1A	protein_coding	non-coding	65298282	rs2723087	A	T	A	381994	0.975354	0.00532595	2.79154e-06	NA
CVD	Overall	2	CEP68	protein_coding	non-coding intronic,non-coding,intronic	65298282	rs2723087	A	T	A	381994	0.975354	0.00532595	2.79154e-06	NA
CVD	noDM	2	RAB1A	protein_coding	non-coding	65298282	rs2723087	A	T	A	345245	0.97567	0.00562171	1.17907e-05	NA
CVD	noDM	2	CEP68	protein_coding	non-coding intronic,non-coding,intronic	65298282	rs2723087	A	T	A	345245	0.97567	0.00562171	1.17907e-05	NA
CVD	DM	2	RAB1A	protein_coding	non-coding	65298282	rs2723087	A	T	A	36749	0.971721	0.0166788	0.0854475	NA
CVD	DM	2	CEP68	protein_coding	non-coding intronic,non-coding,intronic	65298282	rs2723087	A	T	A	36749	0.971721	0.0166788	0.0854475	NA
CVD	Overall	2	RAB1A	protein_coding	non-coding intronic,intronic	65315903	rs1420185	A	G	G	381994	0.969941	0.00534469	1.12744e-08	rs2723087(1),rs17849707(1),rs12621608(1),rs2723091(1),rs6546123(1),rs771963775(1),rs141323732(1),rs76221156(1),rs6736728(1),rs6546124(1),rs6741255(1),rs1894874(1),rs7597073(1),rs3052194(1),2:65308825_ATTTTT_A(1),2:65308828_TTTTTG_T(1),rs113359765(1),rs6546125(1),rs78945874(1),rs1420183(1),rs1050676(1),rs1050675(1),rs1229(1),rs1228(1),rs4671638(1),rs3052195(1),rs61758846(1),rs1420184(1),rs1055903(…
CVD	noDM	2	RAB1A	protein_coding	non-coding intronic,intronic	65315903	rs1420185	A	G	G	345245	0.970214	0.0056415	8.31701e-08	NA
CVD	DM	2	RAB1A	protein_coding	non-coding intronic,intronic	65315903	rs1420185	A	G	G	36749	0.966314	0.0167399	0.0406566	NA
CVD	Overall	2	RAB1A	protein_coding	intronic,non-coding intronic	65345731	rs12465024	G	C	C	381994	0.970713	0.00534563	2.68985e-08	NA
CVD	noDM	2	RAB1A	protein_coding	intronic,non-coding intronic	65345731	rs12465024	G	C	C	345245	0.970987	0.0056423	1.80667e-07	NA
CVD	DM	2	RAB1A	protein_coding	intronic,non-coding intronic	65345731	rs12465024	G	C	C	36749	0.967049	0.0167477	0.0454329	NA
CVD	Overall	2	RAB1A	protein_coding	intronic,non-coding intronic	65346974	rs201667812	AC	A	A	381994	0.97013	0.00534167	1.37051e-08	NA
CVD	noDM	2	RAB1A	protein_coding	intronic,non-coding intronic	65346974	rs201667812	AC	A	A	345245	0.969947	0.00563808	6.23115e-08	rs2723087(1),rs17849707(1),rs12621608(1),rs2723091(1),rs6546123(1),rs771963775(1),rs141323732(1),rs541852068(1),rs76221156(1),rs6736728(1),rs6546124(1),rs6741255(1),rs1894874(1),rs7597073(1),2:65308345_CAA_C(1),rs3052194(1),rs1541576(1),2:65308825_ATTTTT_A(1),2:65308828_TTTTTG_T(1),rs113359765(1),rs6546125(1),rs78945874(1),rs1420183(1),rs1050676(1),rs1050675(1),rs1229(1),rs1228(1),rs4671638(1),rs…
CVD	DM	2	RAB1A	protein_coding	intronic,non-coding intronic	65346974	rs201667812	AC	A	A	36749	0.970537	0.0167402	0.0740289	NA
CVD	Overall	2	NFU1	protein_coding	non-coding intronic,intronic	69656354	rs59129812	C	T	C	381994	1.01799	0.00652718	0.00630339	NA
CVD	noDM	2	NFU1	protein_coding	non-coding intronic,intronic	69656354	rs59129812	C	T	C	345245	1.02095	0.00688934	0.00261933	NA
CVD	DM	2	NFU1	protein_coding	non-coding intronic,intronic	69656354	rs59129812	C	T	C	36749	0.991917	0.0203813	0.690497	NA
CVD	Overall	2	RAB11FIP5	protein_coding	non-coding intronic	73383375	rs13414338	T	C	T	381994	1.01804	0.00528269	0.000712764	NA
CVD	noDM	2	RAB11FIP5	protein_coding	non-coding intronic	73383375	rs13414338	T	C	T	345245	1.01923	0.00557815	0.000637127	NA
CVD	DM	2	RAB11FIP5	protein_coding	non-coding intronic	73383375	rs13414338	T	C	T	36749	1.00702	0.0164823	0.671082	NA
CVD	Overall	2	ELMOD3	protein_coding	intronic,non-coding intronic,3downstream	85584988	rs56352074	C	T	C	381994	0.998712	0.00520922	0.804573	NA
CVD	noDM	2	ELMOD3	protein_coding	intronic,non-coding intronic,3downstream	85584988	rs56352074	C	T	C	345245	1.00203	0.00550049	0.712344	NA
CVD	DM	2	ELMOD3	protein_coding	intronic,non-coding intronic,3downstream	85584988	rs56352074	C	T	C	36749	0.970501	0.0162455	0.0653094	NA
CVD	Overall	2	ELMOD3	protein_coding	3downstream,5upstream,non-coding intronic,intronic	85615287	rs6707822	A	T	T	381994	0.998674	0.00533467	0.803561	NA
CVD	noDM	2	ELMOD3	protein_coding	3downstream,5upstream,non-coding intronic,intronic	85615287	rs6707822	A	T	T	345245	0.998359	0.00563077	0.770515	NA
CVD	DM	2	ELMOD3	protein_coding	3downstream,5upstream,non-coding intronic,intronic	85615287	rs6707822	A	T	T	36749	1.00133	0.0167135	0.936779	NA
CVD	Overall	2	VAMP8	protein_coding	intronic	85796961	rs532988600	CA	C	CA	381994	0.999328	0.00511912	0.895576	NA
CVD	noDM	2	VAMP8	protein_coding	intronic	85796961	rs532988600	CA	C	CA	345245	0.998827	0.00540361	0.828061	NA
CVD	DM	2	VAMP8	protein_coding	intronic	85796961	rs532988600	CA	C	CA	36749	1.00376	0.0160297	0.814829	NA
CVD	Overall	2	MRPL35	protein_coding	intronic	86427821	rs2059352	A	G	A	381994	0.980333	0.00528808	0.000172581	NA
CVD	noDM	2	MRPL35	protein_coding	intronic	86427821	rs2059352	A	G	A	345245	0.982345	0.00558355	0.00142204	NA
CVD	DM	2	MRPL35	protein_coding	intronic	86427821	rs2059352	A	G	A	36749	0.963009	0.016498	0.0223322	NA
CVD	Overall	2	FAHD2A	protein_coding	3utr	96081230	rs3866290	C	T	C	381994	1.00633	0.00521569	0.226118	NA
CVD	noDM	2	FAHD2A	protein_coding	3utr	96081230	rs3866290	C	T	C	345245	1.0052	0.00550809	0.346454	NA
CVD	DM	2	FAHD2A	protein_coding	3utr	96081230	rs3866290	C	T	C	36749	1.01697	0.0162748	0.301118	NA
CVD	Overall	2	GPAT2	protein_coding	intronic,non-coding,non-coding intronic	96689334	rs2969473	C	G	C	381994	1.01336	0.00536476	0.0133812	NA
CVD	noDM	2	GPAT2	protein_coding	intronic,non-coding,non-coding intronic	96689334	rs2969473	C	G	C	345245	1.01076	0.0056661	0.0589336	NA
CVD	DM	2	GPAT2	protein_coding	intronic,non-coding,non-coding intronic	96689334	rs2969473	C	G	C	36749	1.03725	0.0167435	0.028945	NA
CVD	Overall	2	AFF3	protein_coding	non-coding intronic,intronic	100735304	rs3748927	T	C	T	381994	0.996756	0.00592177	0.583188	NA
CVD	noDM	2	AFF3	protein_coding	non-coding intronic,intronic	100735304	rs3748927	T	C	T	345245	0.998451	0.00624781	0.803996	NA
CVD	DM	2	AFF3	protein_coding	non-coding intronic,intronic	100735304	rs3748927	T	C	T	36749	0.980696	0.0185877	0.294323	NA
CVD	Overall	2	BCL2L11	protein_coding	3downstream,intronic	111888043	rs72836348	A	G	A	381994	1.01346	0.00837093	0.110253	NA
CVD	noDM	2	BCL2L11	protein_coding	3downstream,intronic	111888043	rs72836348	A	G	A	345245	1.01456	0.00882182	0.101272	NA
CVD	DM	2	BCL2L11	protein_coding	3downstream,intronic	111888043	rs72836348	A	G	A	36749	1.00427	0.0265349	0.8725	NA
CVD	Overall	2	BCL2L11	protein_coding	intronic	111894720	rs17041868	C	T	C	381994	1.04682	0.0101926	7.13963e-06	NA
CVD	noDM	2	BCL2L11	protein_coding	intronic	111894720	rs17041868	C	T	C	345245	1.04441	0.0107761	5.51665e-05	NA
CVD	DM	2	BCL2L11	protein_coding	intronic	111894720	rs17041868	C	T	C	36749	1.0667	0.0315731	0.0408598	NA
CVD	Overall	2	BCL2L11	protein_coding	intronic	111899881	rs3761706	A	G	A	381994	1.0458	0.0102333	1.20746e-05	NA
CVD	noDM	2	BCL2L11	protein_coding	intronic	111899881	rs3761706	A	G	A	345245	1.04353	0.0108195	8.21059e-05	NA
CVD	DM	2	BCL2L11	protein_coding	intronic	111899881	rs3761706	A	G	A	36749	1.06468	0.0316859	0.0479353	NA
CVD	Overall	2	BCL2L11	protein_coding	intronic	111909247	rs3789068	G	A	G	381994	0.994867	0.00504124	0.307366	NA
CVD	noDM	2	BCL2L11	protein_coding	intronic	111909247	rs3789068	G	A	G	345245	0.995833	0.00531991	0.432457	NA
CVD	DM	2	BCL2L11	protein_coding	intronic	111909247	rs3789068	G	A	G	36749	0.985996	0.0158204	0.372683	NA
CVD	Overall	2	PLA2R1	protein_coding	intronic	160914549	rs11901391	C	T	C	381994	0.984573	0.00644938	0.0159253	NA
CVD	noDM	2	PLA2R1	protein_coding	intronic	160914549	rs11901391	C	T	C	345245	0.98723	0.00680678	0.0589982	NA
CVD	DM	2	PLA2R1	protein_coding	intronic	160914549	rs11901391	C	T	C	36749	0.962749	0.0201636	0.0597363	NA
CVD	Overall	2	PSMD14	protein_coding	intronic,non-coding,non-coding intronic	162265189	rs12471336	T	G	T	381994	0.951245	0.00936186	9.34245e-08	rs62197074(1),rs4664044(1),rs3769967(1),rs77276341(1),2:162175851_ATCTC_A(1),rs57090160(1),rs62197078(1),rs60767767(1),rs112335657(1),rs62197080(1),rs386652136(1),rs6755815(1),rs62194491(1),rs3769964(1),rs62194492(1),rs62194493(1),rs2303319(1),rs2042489(1),rs144262443(1),rs12467117(1),rs10497214(1),rs76063526(1),rs62188121(1),rs62188122(1),rs2194726(1),rs2194727(1),rs16845807(1),rs1921674(1),rs37…
CVD	noDM	2	PSMD14	protein_coding	intronic,non-coding,non-coding intronic	162265189	rs12471336	T	G	T	345245	0.955687	0.00988553	4.54084e-06	NA
CVD	DM	2	PSMD14	protein_coding	intronic,non-coding,non-coding intronic	162265189	rs12471336	T	G	T	36749	0.912738	0.02904	0.00166574	NA
CVD	Overall	2	IFIH1	protein_coding	intronic	163132346	rs78456138	T	C	T	381994	0.973676	0.0163965	0.103743	NA
CVD	noDM	2	IFIH1	protein_coding	intronic	163132346	rs78456138	T	C	T	345245	0.967411	0.0173105	0.0556217	NA
CVD	DM	2	IFIH1	protein_coding	intronic	163132346	rs78456138	T	C	T	36749	1.03364	0.0518839	0.523643	NA
CVD	Overall	2	SLC25A12	protein_coding	5upstream,intronic	172646017	rs7604821	C	A	C	381994	0.985428	0.00533386	0.00592199	NA
CVD	noDM	2	SLC25A12	protein_coding	5upstream,intronic	172646017	rs7604821	C	A	C	345245	0.987001	0.00563111	0.0201442	NA
CVD	DM	2	SLC25A12	protein_coding	5upstream,intronic	172646017	rs7604821	C	A	C	36749	0.970982	0.0166672	0.0772684	NA
CVD	Overall	2	SLC25A12	protein_coding	intronic,5upstream	172668715	rs3770451	G	T	G	381994	0.985383	0.00559613	0.00850721	NA
CVD	noDM	2	SLC25A12	protein_coding	intronic,5upstream	172668715	rs3770451	G	T	G	345245	0.986921	0.0059087	0.0258739	NA
CVD	DM	2	SLC25A12	protein_coding	intronic,5upstream	172668715	rs3770451	G	T	G	36749	0.97122	0.0174638	0.0944911	NA
CVD	Overall	2	SLC25A12	protein_coding	intronic,3downstream,non-coding intronic	172690265	rs908671	G	C	G	381994	0.984366	0.00556226	0.00461242	NA
CVD	noDM	2	SLC25A12	protein_coding	intronic,3downstream,non-coding intronic	172690265	rs908671	G	C	G	345245	0.986132	0.00587283	0.017415	NA
CVD	DM	2	SLC25A12	protein_coding	intronic,3downstream,non-coding intronic	172690265	rs908671	G	C	G	36749	0.968193	0.0173584	0.0625793	NA
CVD	Overall	2	ANKRD44	protein_coding	non-coding intronic,intronic	198145185	rs781683171	C	CT	C	381994	0.994922	0.00580175	0.380178	NA
CVD	Overall	2	ANKRD44-IT1	sense_intronic	non-coding intronic	198145185	rs781683171	C	CT	C	381994	0.994922	0.00580175	0.380178	NA
CVD	noDM	2	ANKRD44	protein_coding	non-coding intronic,intronic	198145185	rs781683171	C	CT	C	345245	0.997222	0.00612556	0.649705	NA
CVD	noDM	2	ANKRD44-IT1	sense_intronic	non-coding intronic	198145185	rs781683171	C	CT	C	345245	0.997222	0.00612556	0.649705	NA
CVD	DM	2	ANKRD44	protein_coding	non-coding intronic,intronic	198145185	rs781683171	C	CT	C	36749	0.974689	0.018092	0.156467	NA
CVD	DM	2	ANKRD44-IT1	sense_intronic	non-coding intronic	198145185	rs781683171	C	CT	C	36749	0.974689	0.018092	0.156467	NA
CVD	Overall	2	ICA1L	protein_coding	intronic	203649341	rs72932725	A	G	A	381994	1.0179	0.00751322	0.0182348	NA
CVD	noDM	2	ICA1L	protein_coding	intronic	203649341	rs72932725	A	G	A	345245	1.01644	0.00792719	0.0396333	NA
CVD	DM	2	ICA1L	protein_coding	intronic	203649341	rs72932725	A	G	A	36749	1.03188	0.0236582	0.184663	NA
CVD	Overall	2	ICA1L	protein_coding	intronic,3downstream,non-coding intronic	203683990	rs79633844	G	A	G	381994	1.01888	0.00750603	0.0127207	NA
CVD	noDM	2	ICA1L	protein_coding	intronic,3downstream,non-coding intronic	203683990	rs79633844	G	A	G	345245	1.01732	0.00792004	0.0301634	NA
CVD	DM	2	ICA1L	protein_coding	intronic,3downstream,non-coding intronic	203683990	rs79633844	G	A	G	36749	1.0339	0.0236276	0.158198	NA
CVD	Overall	2	ICA1L	protein_coding	non-coding intronic,intronic	203704796	rs532184078	AT	A	AT	381994	0.996635	0.00578797	0.560283	NA
CVD	noDM	2	ICA1L	protein_coding	non-coding intronic,intronic	203704796	rs532184078	AT	A	AT	345245	1.00037	0.00611105	0.951162	NA
CVD	DM	2	ICA1L	protein_coding	non-coding intronic,intronic	203704796	rs532184078	AT	A	AT	36749	0.965247	0.0180336	0.0498299	NA
CVD	Overall	2	ICA1L	protein_coding	non-coding intronic,intronic	203706530	rs4675300	C	G	C	381994	0.996228	0.00534735	0.479755	NA
CVD	noDM	2	ICA1L	protein_coding	non-coding intronic,intronic	203706530	rs4675300	C	G	C	345245	0.997508	0.00564442	0.658407	NA
CVD	DM	2	ICA1L	protein_coding	non-coding intronic,intronic	203706530	rs4675300	C	G	C	36749	0.984811	0.016734	0.36038	NA
CVD	Overall	2	ICA1L	protein_coding	intronic,non-coding intronic	203726994	rs538755961	AC	A	A	381994	1.00761	0.00649169	0.242959	NA
CVD	noDM	2	ICA1L	protein_coding	intronic,non-coding intronic	203726994	rs538755961	AC	A	A	345245	1.00617	0.00685416	0.36923	NA
CVD	DM	2	ICA1L	protein_coding	intronic,non-coding intronic	203726994	rs538755961	AC	A	A	36749	1.02086	0.0203126	0.309424	NA
CVD	Overall	2	ICA1L	protein_coding	intronic,non-coding intronic	203728984	rs186399184	T	C	T	381994	1.02111	0.0076994	0.00665608	NA
CVD	noDM	2	ICA1L	protein_coding	intronic,non-coding intronic	203728984	rs186399184	T	C	T	345245	1.01983	0.00812364	0.0156211	NA
CVD	DM	2	ICA1L	protein_coding	intronic,non-coding intronic	203728984	rs186399184	T	C	T	36749	1.03378	0.024238	0.170438	NA
CVD	Overall	2	ICA1L	protein_coding	intronic,5upstream,non-coding intronic	203734866	rs4510208	A	C	A	381994	1.01972	0.00749178	0.00914759	NA
CVD	noDM	2	ICA1L	protein_coding	intronic,5upstream,non-coding intronic	203734866	rs4510208	A	C	A	345245	1.01815	0.00790513	0.0228458	NA
CVD	DM	2	ICA1L	protein_coding	intronic,5upstream,non-coding intronic	203734866	rs4510208	A	C	A	36749	1.03474	0.0235799	0.147564	NA
CVD	Overall	2	CREB1	protein_coding	5utr,5upstream	208394531	rs2464976	T	G	T	381994	0.981615	0.00650178	0.00431755	NA
CVD	noDM	2	CREB1	protein_coding	5utr,5upstream	208394531	rs2464976	T	G	T	345245	0.982338	0.00686808	0.009469	NA
CVD	DM	2	CREB1	protein_coding	5utr,5upstream	208394531	rs2464976	T	G	T	36749	0.976539	0.0202097	0.240099	NA
CVD	Overall	2	CREB1	protein_coding	non-coding intronic,intronic	208402750	rs4675682	C	T	C	381994	1.02853	0.00503788	2.34034e-08	rs2464976(1),rs2551639(1),rs35303892(1),rs889895(1),rs11883511(1),rs2551640(1),rs113889746(1),rs2360970(1),rs2551641(1),rs561597834(1),rs2709356(1),rs2709357(1),rs2551642(1),rs2042486(1),rs2709398(1),rs2709399(1),rs2709400(1),rs2551917(1),rs2709402(1),rs2709403(1),rs2709404(1),rs2709378(1),rs10932201(1),rs11904814(1),rs2709381(1),rs34127936(1),rs6740584(1),2:208429762_GT_G(1),rs2551919(1),rs25519…
CVD	noDM	2	CREB1	protein_coding	non-coding intronic,intronic	208402750	rs4675682	C	T	C	345245	1.02676	0.00532107	6.92861e-07	rs2464976(1),rs2551639(1),rs35303892(1),rs889895(1),rs11883511(1),rs2551640(1),rs113889746(1),rs2360970(1),rs2551641(1),rs561597834(1),rs2709356(1),rs2709357(1),rs2551642(1),rs2042486(1),rs2709398(1),rs2709399(1),rs2709400(1),rs2551917(1),rs2709402(1),rs2709403(1),rs2709404(1),rs2709378(1),rs10932201(1),rs11904814(1),rs2709381(1),rs34127936(1),rs6740584(1),2:208429762_GT_G(1),rs2551919(1),rs25519…
CVD	DM	2	CREB1	protein_coding	non-coding intronic,intronic	208402750	rs4675682	C	T	C	36749	1.04536	0.0156961	0.00470903	NA
CVD	Overall	2	CREB1	protein_coding	non-coding intronic,intronic	208409339	rs2360970	C	G	C	381994	1.02852	0.00504123	2.43382e-08	NA
CVD	noDM	2	CREB1	protein_coding	non-coding intronic,intronic	208409339	rs2360970	C	G	C	345245	1.02672	0.00532477	7.37054e-07	NA
CVD	DM	2	CREB1	protein_coding	non-coding intronic,intronic	208409339	rs2360970	C	G	C	36749	1.0456	0.0157028	0.00451446	NA
CVD	Overall	2	CREB1	protein_coding	non-coding intronic,intronic	208412847	rs138246582	A	G	A	381994	0.983471	0.00993215	0.0933292	NA
CVD	noDM	2	CREB1	protein_coding	non-coding intronic,intronic	208412847	rs138246582	A	G	A	345245	0.987467	0.0104828	0.228937	NA
CVD	DM	2	CREB1	protein_coding	non-coding intronic,intronic	208412847	rs138246582	A	G	A	36749	0.949829	0.0309456	0.096244	NA
CVD	Overall	2	CPS1	protein_coding	3downstream,intronic	211446121	rs10165443	T	C	C	381994	0.996852	0.00504842	0.532299	NA
CVD	noDM	2	CPS1	protein_coding	3downstream,intronic	211446121	rs10165443	T	C	C	345245	0.997473	0.00533441	0.635329	NA
CVD	DM	2	CPS1	protein_coding	3downstream,intronic	211446121	rs10165443	T	C	C	36749	0.990119	0.0156678	0.526206	NA
CVD	Overall	2	CPS1	protein_coding	non-coding,coding nonsyn	211540507	rs1047891	A	C	A	381994	0.980931	0.00540654	0.000369354	NA
CVD	noDM	2	CPS1	protein_coding	non-coding,coding nonsyn	211540507	rs1047891	A	C	A	345245	0.97954	0.00571242	0.000296027	NA
CVD	DM	2	CPS1	protein_coding	non-coding,coding nonsyn	211540507	rs1047891	A	C	A	36749	0.993112	0.0168077	0.680915	NA
CVD	Overall	2	FN1	protein_coding	intronic	216300185	rs1250258	T	C	C	381994	1.01706	0.00570669	0.00303392	NA
CVD	noDM	2	FN1	protein_coding	intronic	216300185	rs1250258	T	C	C	345245	1.01755	0.00602767	0.00390585	NA
CVD	DM	2	FN1	protein_coding	intronic	216300185	rs1250258	T	C	C	36749	1.01345	0.017763	0.451838	NA
CVD	Overall	2	FN1	protein_coding	coding nonsyn	216300482	rs1250259	A	T	T	381994	1.0173	0.00570479	0.00264317	NA
CVD	noDM	2	FN1	protein_coding	coding nonsyn	216300482	rs1250259	A	T	T	345245	1.01764	0.00602578	0.00370018	NA
CVD	DM	2	FN1	protein_coding	coding nonsyn	216300482	rs1250259	A	T	T	36749	1.01501	0.0177562	0.40142	NA
CVD	Overall	2	TMBIM1	protein_coding	intronic,non-coding,3downstream,non-coding intronic	219142773	rs6707559	T	C	C	381994	1.01554	0.00511595	0.00257184	NA
CVD	Overall	2	PNKD	protein_coding	non-coding intronic,intronic	219142773	rs6707559	T	C	C	381994	1.01554	0.00511595	0.00257184	NA
CVD	noDM	2	TMBIM1	protein_coding	intronic,non-coding,3downstream,non-coding intronic	219142773	rs6707559	T	C	C	345245	1.0148	0.00540056	0.0065352	NA
CVD	noDM	2	PNKD	protein_coding	non-coding intronic,intronic	219142773	rs6707559	T	C	C	345245	1.0148	0.00540056	0.0065352	NA
CVD	DM	2	TMBIM1	protein_coding	intronic,non-coding,3downstream,non-coding intronic	219142773	rs6707559	T	C	C	36749	1.02144	0.0160133	0.185165	NA
CVD	DM	2	PNKD	protein_coding	non-coding intronic,intronic	219142773	rs6707559	T	C	C	36749	1.02144	0.0160133	0.185165	NA
CVD	Overall	2	PNKD	protein_coding	non-coding intronic,intronic	219157692	rs10193383	T	C	C	381994	1.01479	0.00511423	0.00410654	NA
CVD	noDM	2	PNKD	protein_coding	non-coding intronic,intronic	219157692	rs10193383	T	C	C	345245	1.0138	0.00539914	0.0111055	NA
CVD	DM	2	PNKD	protein_coding	non-coding intronic,intronic	219157692	rs10193383	T	C	C	36749	1.02284	0.0159995	0.158172	NA
CVD	Overall	2	ZNF142	protein_coding	5utr,intronic	219524089	rs13011338	T	C	T	381994	0.954463	0.0141869	0.00101915	NA
CVD	Overall	2	BCS1L	protein_coding	5upstream,intronic	219524089	rs13011338	T	C	T	381994	0.954463	0.0141869	0.00101915	NA
CVD	noDM	2	ZNF142	protein_coding	5utr,intronic	219524089	rs13011338	T	C	T	345245	0.950072	0.0150191	0.000649322	NA
CVD	noDM	2	BCS1L	protein_coding	5upstream,intronic	219524089	rs13011338	T	C	T	345245	0.950072	0.0150191	0.000649322	NA
CVD	DM	2	ZNF142	protein_coding	5utr,intronic	219524089	rs13011338	T	C	T	36749	0.995488	0.0436955	0.917566	NA
CVD	DM	2	BCS1L	protein_coding	5upstream,intronic	219524089	rs13011338	T	C	T	36749	0.995488	0.0436955	0.917566	NA
CVD	Overall	2	TTLL4	protein_coding	intronic	219578361	rs6436066	G	T	G	381994	1.01197	0.00505615	0.0186291	NA
CVD	noDM	2	TTLL4	protein_coding	intronic	219578361	rs6436066	G	T	G	345245	1.01102	0.00533878	0.0400414	NA
CVD	DM	2	TTLL4	protein_coding	intronic	219578361	rs6436066	G	T	G	36749	1.02038	0.0157946	0.201505	NA
CVD	Overall	2	TTLL4	protein_coding	intronic	219590348	rs148358468	A	G	A	381994	1.02071	0.0115467	0.0757999	NA
CVD	noDM	2	TTLL4	protein_coding	intronic	219590348	rs148358468	A	G	A	345245	1.01637	0.0121989	0.183171	NA
CVD	DM	2	TTLL4	protein_coding	intronic	219590348	rs148358468	A	G	A	36749	1.05895	0.0361102	0.112719	NA
CVD	Overall	2	TTLL4	protein_coding	intronic	219596321	rs62191629	A	G	A	381994	0.96549	0.0114678	0.00219515	NA
CVD	noDM	2	TTLL4	protein_coding	intronic	219596321	rs62191629	A	G	A	345245	0.964329	0.0121239	0.00273543	NA
CVD	DM	2	TTLL4	protein_coding	intronic	219596321	rs62191629	A	G	A	36749	0.976455	0.0355132	0.502278	NA
CVD	Overall	3	ATG7	protein_coding	intronic	11396100	rs9873503	C	T	T	381994	0.964877	0.00540604	3.74401e-11	rs2606729(1),rs2122031(1),rs2594989(1),rs2594990(1),rs71316462(1),rs384989(1),rs388407(1),rs439738(1),rs2594965(1),rs921226(1),rs2594966(1),rs346077(1),rs346078(1),rs346079(1),3:11328595_TTTA_T(1),rs346081(1),rs346082(1),rs2594986(1),rs60056696(1),rs1499119(1),rs7625184(1),rs13084898(1),rs11391218(1),rs1470612(1),rs1375206(1),rs2594994(1),rs13081232(1),rs13058769(1),rs11706903(1),rs11706990(1),rs…
CVD	noDM	3	ATG7	protein_coding	intronic	11396100	rs9873503	C	T	T	345245	0.963885	0.00571046	1.18377e-10	NA
CVD	DM	3	ATG7	protein_coding	intronic	11396100	rs9873503	C	T	T	36749	0.973513	0.0168379	0.110872	NA
CVD	Overall	3	ATG7	protein_coding	intronic	11396562	rs2606738	C	T	T	381994	0.965581	0.00535837	6.2958e-11	NA
CVD	noDM	3	ATG7	protein_coding	intronic	11396562	rs2606738	C	T	T	345245	0.964855	0.00565988	2.59398e-10	NA
CVD	DM	3	ATG7	protein_coding	intronic	11396562	rs2606738	C	T	T	36749	0.972071	0.0166927	0.0897103	NA
CVD	Overall	3	ATG7	protein_coding	intronic	11413429	rs7627171	C	G	G	381994	0.966889	0.00529959	2.10405e-10	NA
CVD	noDM	3	ATG7	protein_coding	intronic	11413429	rs7627171	C	G	G	345245	0.965044	0.00559869	2.07857e-10	NA
CVD	DM	3	ATG7	protein_coding	intronic	11413429	rs7627171	C	G	G	36749	0.982873	0.0164949	0.294966	NA
CVD	Overall	3	ATG7	protein_coding	intronic	11427455	rs7632040	G	A	A	381994	0.967146	0.00516736	1.01487e-10	NA
CVD	noDM	3	ATG7	protein_coding	intronic	11427455	rs7632040	G	A	A	345245	0.965309	0.00545799	9.86842e-11	rs2606729(1),rs2122031(1),rs2594989(1),rs2594990(1),rs71316462(1),rs384989(1),rs388407(1),rs439738(1),rs2594965(1),rs921226(1),rs2594966(1),rs346077(1),rs346078(1),rs346079(1),3:11328595_TTTA_T(1),rs346081(1),rs346082(1),rs2594986(1),rs60056696(1),rs1499119(1),rs7625184(1),rs13084898(1),rs11391218(1),rs1470612(1),rs1375206(1),rs2594994(1),rs13081232(1),rs13058769(1),rs11706903(1),rs11706990(1),rs…
CVD	DM	3	ATG7	protein_coding	intronic	11427455	rs7632040	G	A	A	36749	0.982665	0.0161047	0.277559	NA
CVD	Overall	3	ATG7	protein_coding	intronic	11461863	rs9826803	A	G	G	381994	0.966589	0.00535434	2.19973e-10	NA
CVD	noDM	3	ATG7	protein_coding	intronic	11461863	rs9826803	A	G	G	345245	0.965787	0.00565691	7.56497e-10	NA
CVD	DM	3	ATG7	protein_coding	intronic	11461863	rs9826803	A	G	G	36749	0.973791	0.0166488	0.110656	NA
CVD	Overall	3	PPARG	protein_coding	5upstream,intronic,5utr	12329452	rs17029006	T	C	T	381994	0.991062	0.0056935	0.114807	NA
CVD	noDM	3	PPARG	protein_coding	5upstream,intronic,5utr	12329452	rs17029006	T	C	T	345245	0.98624	0.00601034	0.0211539	NA
CVD	DM	3	PPARG	protein_coding	5upstream,intronic,5utr	12329452	rs17029006	T	C	T	36749	1.03428	0.017884	0.0594559	NA
CVD	Overall	3	PPARG	protein_coding	intronic,5utr,5upstream	12330411	rs17036170	A	G	A	381994	0.976526	0.025121	0.344358	NA
CVD	noDM	3	PPARG	protein_coding	intronic,5utr,5upstream	12330411	rs17036170	A	G	A	345245	0.975395	0.0266467	0.349824	NA
CVD	DM	3	PPARG	protein_coding	intronic,5utr,5upstream	12330411	rs17036170	A	G	A	36749	0.993016	0.0756789	0.926218	NA
CVD	Overall	3	PPARG	protein_coding	non-coding intronic,intronic	12351223	rs12485478	G	A	G	381994	1.03098	0.0158133	0.0536502	NA
CVD	noDM	3	PPARG	protein_coding	non-coding intronic,intronic	12351223	rs12485478	G	A	G	345245	1.0313	0.0167326	0.065521	NA
CVD	DM	3	PPARG	protein_coding	non-coding intronic,intronic	12351223	rs12485478	G	A	G	36749	1.03202	0.048471	0.515519	NA
CVD	Overall	3	PPARG	protein_coding	intronic,non-coding intronic	12351521	rs35000407	G	T	G	381994	1.00105	0.00774743	0.892024	NA
CVD	noDM	3	PPARG	protein_coding	intronic,non-coding intronic	12351521	rs35000407	G	T	G	345245	1.0125	0.0081563	0.127762	NA
CVD	DM	3	PPARG	protein_coding	intronic,non-coding intronic	12351521	rs35000407	G	T	G	36749	0.905531	0.0244772	5.03227e-05	NA
CVD	Overall	3	PPARG	protein_coding	intronic,non-coding intronic	12359049	rs2067819	A	G	A	381994	0.999827	0.00612147	0.97749	NA
CVD	noDM	3	PPARG	protein_coding	intronic,non-coding intronic	12359049	rs2067819	A	G	A	345245	1.0063	0.00645582	0.330364	NA
CVD	DM	3	PPARG	protein_coding	intronic,non-coding intronic	12359049	rs2067819	A	G	A	36749	0.945903	0.0191956	0.0037642	NA
CVD	Overall	3	PPARG	protein_coding	intronic,non-coding intronic	12369401	rs13064760	T	C	T	381994	1.001	0.00775194	0.897446	NA
CVD	noDM	3	PPARG	protein_coding	intronic,non-coding intronic	12369401	rs13064760	T	C	T	345245	1.01238	0.00816114	0.131624	NA
CVD	DM	3	PPARG	protein_coding	intronic,non-coding intronic	12369401	rs13064760	T	C	T	36749	0.906071	0.024491	5.63721e-05	NA
CVD	Overall	3	PPARG	protein_coding	non-coding intronic,intronic	12396588	rs4135247	A	G	G	381994	1.00393	0.00508702	0.440999	NA
CVD	noDM	3	PPARG	protein_coding	non-coding intronic,intronic	12396588	rs4135247	A	G	G	345245	0.999133	0.00537116	0.871763	NA
CVD	DM	3	PPARG	protein_coding	non-coding intronic,intronic	12396588	rs4135247	A	G	G	36749	1.04598	0.0159105	0.00472272	NA
CVD	Overall	3	PPARG	protein_coding	non-coding intronic,intronic	12396732	rs4135248	C	T	C	381994	1.00482	0.0161341	0.765535	NA
CVD	noDM	3	PPARG	protein_coding	non-coding intronic,intronic	12396732	rs4135248	C	T	C	345245	0.995444	0.0170416	0.788747	NA
CVD	DM	3	PPARG	protein_coding	non-coding intronic,intronic	12396732	rs4135248	C	T	C	36749	1.09215	0.051036	0.0841321	NA
CVD	Overall	3	PPARG	protein_coding	intronic,3downstream	12448940	rs709147	G	A	G	381994	0.994611	0.00517771	0.296673	NA
CVD	noDM	3	PPARG	protein_coding	intronic,3downstream	12448940	rs709147	G	A	G	345245	0.995394	0.00546595	0.39829	NA
CVD	DM	3	PPARG	protein_coding	intronic,3downstream	12448940	rs709147	G	A	G	36749	0.987851	0.0161934	0.450352	NA
CVD	Overall	3	PPARG	protein_coding	intronic	12451117	rs776435324	A	AGTGGCTATGGCTGT	A	381994	0.994169	0.00518418	0.259304	NA
CVD	noDM	3	PPARG	protein_coding	intronic	12451117	rs776435324	A	AGTGGCTATGGCTGT	A	345245	0.995028	0.0054727	0.362401	NA
CVD	DM	3	PPARG	protein_coding	intronic	12451117	rs776435324	A	AGTGGCTATGGCTGT	A	36749	0.986779	0.0162151	0.411784	NA
CVD	Overall	3	RAF1	protein_coding	intronic	12655927	rs35902148	GTA	G	G	381994	0.995715	0.00508075	0.397966	NA
CVD	noDM	3	RAF1	protein_coding	intronic	12655927	rs35902148	GTA	G	G	345245	0.995576	0.00536681	0.408725	NA
CVD	DM	3	RAF1	protein_coding	intronic	12655927	rs35902148	GTA	G	G	36749	0.996862	0.0158177	0.842488	NA
CVD	Overall	3	RAF1	protein_coding	intronic	12689451	rs55762590	T	C	T	381994	0.99038	0.00642477	0.132444	NA
CVD	noDM	3	RAF1	protein_coding	intronic	12689451	rs55762590	T	C	T	345245	0.992071	0.00678036	0.240389	NA
CVD	DM	3	RAF1	protein_coding	intronic	12689451	rs55762590	T	C	T	36749	0.976396	0.0201117	0.234944	NA
CVD	Overall	3	RAF1	protein_coding	intronic	12701069	rs142536918	CAATAAAAGACCT	C	CAATAAAAGACCT	381994	0.989846	0.00542262	0.0598207	NA
CVD	noDM	3	RAF1	protein_coding	intronic	12701069	rs142536918	CAATAAAAGACCT	C	CAATAAAAGACCT	345245	0.990451	0.00572351	0.093643	NA
CVD	DM	3	RAF1	protein_coding	intronic	12701069	rs142536918	CAATAAAAGACCT	C	CAATAAAAGACCT	36749	0.984015	0.0169837	0.34272	NA
CVD	Overall	3	BTD	protein_coding	non-coding intronic,intronic	15647537	rs547507925	C	G	C	381994	1.00709	0.00567523	0.212898	NA
CVD	noDM	3	BTD	protein_coding	non-coding intronic,intronic	15647537	rs547507925	C	G	C	345245	1.00683	0.00599311	0.256323	NA
CVD	DM	3	BTD	protein_coding	non-coding intronic,intronic	15647537	rs547507925	C	G	C	36749	1.0097	0.0177101	0.585554	NA
CVD	Overall	3	BTD	protein_coding	non-coding intronic,intronic	15681940	rs2455821	A	C	A	381994	1.00769	0.00564868	0.174906	NA
CVD	noDM	3	BTD	protein_coding	non-coding intronic,intronic	15681940	rs2455821	A	C	A	345245	1.0084	0.00596478	0.16102	NA
CVD	DM	3	BTD	protein_coding	non-coding intronic,intronic	15681940	rs2455821	A	C	A	36749	1.0014	0.0176208	0.936715	NA
CVD	Overall	3	BTD	protein_coding	coding nonsyn,3downstream	15686534	rs35034250	T	C	T	381994	0.972329	0.0152215	0.0652573	NA
CVD	noDM	3	BTD	protein_coding	coding nonsyn,3downstream	15686534	rs35034250	T	C	T	345245	0.969504	0.0160752	0.0540248	NA
CVD	DM	3	BTD	protein_coding	coding nonsyn,3downstream	15686534	rs35034250	T	C	T	36749	1.0005	0.0477206	0.991634	NA
CVD	Overall	3	MLH1	protein_coding	non-coding intronic,intronic	37036099	rs3836491	AG	A	AG	381994	1.00245	0.00504425	0.627151	NA
CVD	noDM	3	MLH1	protein_coding	non-coding intronic,intronic	37036099	rs3836491	AG	A	AG	345245	1.00078	0.0053264	0.882928	NA
CVD	DM	3	MLH1	protein_coding	non-coding intronic,intronic	37036099	rs3836491	AG	A	AG	36749	1.0166	0.0157484	0.295914	NA
CVD	Overall	3	ULK4	protein_coding	intronic,non-coding intronic	41306063	rs4973930	C	A	A	381994	0.985713	0.00503906	0.00429483	NA
CVD	noDM	3	ULK4	protein_coding	intronic,non-coding intronic	41306063	rs4973930	C	A	A	345245	0.987511	0.00532232	0.0182059	NA
CVD	DM	3	ULK4	protein_coding	intronic,non-coding intronic	41306063	rs4973930	C	A	A	36749	0.969903	0.0156932	0.0515023	NA
CVD	Overall	3	ULK4	protein_coding	intronic	41672700	rs75008287	A	G	A	381994	1.00808	0.0161892	0.619133	NA
CVD	noDM	3	ULK4	protein_coding	intronic	41672700	rs75008287	A	G	A	345245	1.00814	0.0170813	0.635067	NA
CVD	DM	3	ULK4	protein_coding	intronic	41672700	rs75008287	A	G	A	36749	1.00607	0.0508535	0.905264	NA
CVD	Overall	3	ULK4	protein_coding	intronic,non-coding intronic	41865999	rs111574393	G	C	G	381994	1.00609	0.00698099	0.384477	NA
CVD	noDM	3	ULK4	protein_coding	intronic,non-coding intronic	41865999	rs111574393	G	C	G	345245	1.00668	0.0073694	0.36656	NA
CVD	DM	3	ULK4	protein_coding	intronic,non-coding intronic	41865999	rs111574393	G	C	G	36749	1.00234	0.0218295	0.91484	NA
CVD	Overall	3	ULK4	protein_coding	intronic,non-coding intronic	41867446	rs3005543	A	G	A	381994	1.00533	0.00685606	0.438495	NA
CVD	noDM	3	ULK4	protein_coding	intronic,non-coding intronic	41867446	rs3005543	A	G	A	345245	1.00597	0.00723835	0.411031	NA
CVD	DM	3	ULK4	protein_coding	intronic,non-coding intronic	41867446	rs3005543	A	G	A	36749	1.00071	0.0214158	0.973739	NA
CVD	Overall	3	ULK4	protein_coding	intronic,non-coding intronic	41869234	rs147161670	T	C	T	381994	1.0057	0.00693346	0.412376	NA
CVD	noDM	3	ULK4	protein_coding	intronic,non-coding intronic	41869234	rs147161670	T	C	T	345245	1.00624	0.0073198	0.395616	NA
CVD	DM	3	ULK4	protein_coding	intronic,non-coding intronic	41869234	rs147161670	T	C	T	36749	1.00198	0.0216667	0.927179	NA
CVD	Overall	3	DHX30	protein_coding	non-coding intronic,intronic	47855594	rs62263573	C	T	C	381994	1.02284	0.0053429	2.377e-05	NA
CVD	noDM	3	DHX30	protein_coding	non-coding intronic,intronic	47855594	rs62263573	C	T	C	345245	1.02447	0.00564038	1.82261e-05	NA
CVD	DM	3	DHX30	protein_coding	non-coding intronic,intronic	47855594	rs62263573	C	T	C	36749	1.00953	0.0167028	0.570087	NA
CVD	Overall	3	DHX30	protein_coding	intronic	47881942	rs145943094	T	C	T	381994	0.999528	0.0195203	0.980685	NA
CVD	noDM	3	DHX30	protein_coding	intronic	47881942	rs145943094	T	C	T	345245	0.996995	0.0206439	0.884105	NA
CVD	DM	3	DHX30	protein_coding	intronic	47881942	rs145943094	T	C	T	36749	1.02332	0.0604183	0.702761	NA
CVD	Overall	3	NME6	protein_coding	non-coding intronic,intronic	48342669	rs34523942	T	C	T	381994	0.969632	0.00541437	1.22866e-08	NA
CVD	noDM	3	NME6	protein_coding	non-coding intronic,intronic	48342669	rs34523942	T	C	T	345245	0.969222	0.00571646	4.53153e-08	NA
CVD	DM	3	NME6	protein_coding	non-coding intronic,intronic	48342669	rs34523942	T	C	T	36749	0.973383	0.0169296	0.111048	NA
CVD	Overall	3	NME6	protein_coding	5upstream,5utr	48343087	rs36075665	T	C	T	381994	0.9693	0.00541774	8.64694e-09	rs34338515(1),3:47847655_TG_T(1),rs2101398(1),rs4858863(1),rs62263575(1),rs7629850(1),rs3888(1),3:47858407_TA_T(1),rs4858860(1),rs13079407(1),rs752519940(1),rs13072132(1),rs3772399(1),rs3915654(1),rs35582375(1),rs13077230(1),rs11130150(1),rs34507589(1),rs34249203(1),rs9850154(1),rs11710199(1),rs11270376(1),3:47881493_CT_C(1),rs17290490(1),rs319695(1),rs319694(1),rs319693(1),rs1134867(1),rs3197223…
CVD	noDM	3	NME6	protein_coding	5upstream,5utr	48343087	rs36075665	T	C	T	345245	0.969054	0.00572011	3.89728e-08	rs34338515(1),3:47847655_TG_T(1),rs2101398(1),rs4858863(1),rs62263575(1),rs7629850(1),rs3888(1),3:47858407_TA_T(1),rs4858860(1),rs13079407(1),rs752519940(1),rs13072132(1),rs3772399(1),rs3915654(1),rs35582375(1),rs13077230(1),rs11130150(1),rs34507589(1),rs34249203(1),rs9850154(1),rs11710199(1),rs11270376(1),3:47881493_CT_C(1),rs17290490(1),rs319695(1),rs319694(1),rs319693(1),rs1134867(1),rs3197223…
CVD	DM	3	NME6	protein_coding	5upstream,5utr	48343087	rs36075665	T	C	T	36749	0.971637	0.0169364	0.0893454	NA
CVD	Overall	3	CCDC51	protein_coding	intronic	48477252	rs146948889	A	G	A	381994	0.987305	0.0224164	0.568701	NA
CVD	noDM	3	CCDC51	protein_coding	intronic	48477252	rs146948889	A	G	A	345245	0.976472	0.0237589	0.316281	NA
CVD	DM	3	CCDC51	protein_coding	intronic	48477252	rs146948889	A	G	A	36749	1.08811	0.0690815	0.221565	NA
CVD	Overall	3	SLC25A20	protein_coding	intronic	48926161	rs140502640	T	C	T	381994	1.03192	0.0114718	0.00616539	NA
CVD	noDM	3	SLC25A20	protein_coding	intronic	48926161	rs140502640	T	C	T	345245	1.02427	0.0121226	0.0479203	NA
CVD	DM	3	SLC25A20	protein_coding	intronic	48926161	rs140502640	T	C	T	36749	1.10477	0.0360192	0.00566894	NA
CVD	Overall	3	RHOA	protein_coding	intronic	49425004	rs34071734	A	G	A	381994	0.963284	0.0106192	0.000427362	NA
CVD	noDM	3	RHOA	protein_coding	intronic	49425004	rs34071734	A	G	A	345245	0.959979	0.0112195	0.000272176	NA
CVD	DM	3	RHOA	protein_coding	intronic	49425004	rs34071734	A	G	A	36749	0.992548	0.0331846	0.82167	NA
CVD	Overall	3	RNF123	protein_coding	intronic,non-coding intronic,5upstream	49757592	rs138638683	TACA	T	T	381994	1.01821	0.00503294	0.000336988	NA
CVD	Overall	3	AMIGO3	protein_coding	5utr,5upstream	49757592	rs138638683	TACA	T	T	381994	1.01821	0.00503294	0.000336988	NA
CVD	Overall	3	GMPPB	protein_coding	3downstream,3utr	49757592	rs138638683	TACA	T	T	381994	1.01821	0.00503294	0.000336988	NA
CVD	noDM	3	RNF123	protein_coding	intronic,non-coding intronic,5upstream	49757592	rs138638683	TACA	T	T	345245	1.01505	0.00531201	0.00493303	NA
CVD	noDM	3	AMIGO3	protein_coding	5utr,5upstream	49757592	rs138638683	TACA	T	T	345245	1.01505	0.00531201	0.00493303	NA
CVD	noDM	3	GMPPB	protein_coding	3downstream,3utr	49757592	rs138638683	TACA	T	T	345245	1.01505	0.00531201	0.00493303	NA
CVD	DM	3	RNF123	protein_coding	intronic,non-coding intronic,5upstream	49757592	rs138638683	TACA	T	T	36749	1.04496	0.0157732	0.00529872	NA
CVD	DM	3	AMIGO3	protein_coding	5utr,5upstream	49757592	rs138638683	TACA	T	T	36749	1.04496	0.0157732	0.00529872	NA
CVD	DM	3	GMPPB	protein_coding	3downstream,3utr	49757592	rs138638683	TACA	T	T	36749	1.04496	0.0157732	0.00529872	NA
CVD	Overall	3	GMPPB	protein_coding	3utr,3downstream	49758764	rs4768	G	A	G	381994	1.01551	0.00535651	0.00406603	NA
CVD	Overall	3	AMIGO3	protein_coding	5upstream,5utr	49758764	rs4768	G	A	G	381994	1.01551	0.00535651	0.00406603	NA
CVD	Overall	3	RNF123	protein_coding	3utr,non-coding,3downstream	49758764	rs4768	G	A	G	381994	1.01551	0.00535651	0.00406603	NA
CVD	noDM	3	GMPPB	protein_coding	3utr,3downstream	49758764	rs4768	G	A	G	345245	1.01348	0.00565552	0.0179466	NA
CVD	noDM	3	AMIGO3	protein_coding	5upstream,5utr	49758764	rs4768	G	A	G	345245	1.01348	0.00565552	0.0179466	NA
CVD	noDM	3	RNF123	protein_coding	3utr,non-coding,3downstream	49758764	rs4768	G	A	G	345245	1.01348	0.00565552	0.0179466	NA
CVD	DM	3	GMPPB	protein_coding	3utr,3downstream	49758764	rs4768	G	A	G	36749	1.03411	0.0167567	0.0453237	NA
CVD	DM	3	AMIGO3	protein_coding	5upstream,5utr	49758764	rs4768	G	A	G	36749	1.03411	0.0167567	0.0453237	NA
CVD	DM	3	RNF123	protein_coding	3utr,non-coding,3downstream	49758764	rs4768	G	A	G	36749	1.03411	0.0167567	0.0453237	NA
CVD	Overall	3	HEMK1	protein_coding	non-coding intronic,intronic	50610696	rs417592	G	A	A	381994	1.00711	0.00723337	0.327038	NA
CVD	noDM	3	HEMK1	protein_coding	non-coding intronic,intronic	50610696	rs417592	G	A	A	345245	1.00684	0.00763291	0.37177	NA
CVD	DM	3	HEMK1	protein_coding	non-coding intronic,intronic	50610696	rs417592	G	A	A	36749	1.00926	0.0227186	0.68502	NA
CVD	Overall	3	HEMK1	protein_coding	intronic,non-coding intronic,3downstream	50616538	rs139853420	T	C	T	381994	0.982069	0.0225653	0.422653	NA
CVD	noDM	3	HEMK1	protein_coding	intronic,non-coding intronic,3downstream	50616538	rs139853420	T	C	T	345245	0.969289	0.0238836	0.19154	NA
CVD	DM	3	HEMK1	protein_coding	intronic,non-coding intronic,3downstream	50616538	rs139853420	T	C	T	36749	1.10088	0.0706817	0.173894	NA
CVD	Overall	3	WDR82	protein_coding	intronic,non-coding intronic	52299521	rs59612757	C	T	C	381994	0.989143	0.0065243	0.0942794	NA
CVD	noDM	3	WDR82	protein_coding	intronic,non-coding intronic	52299521	rs59612757	C	T	C	345245	0.988441	0.00689059	0.0915534	NA
CVD	DM	3	WDR82	protein_coding	intronic,non-coding intronic	52299521	rs59612757	C	T	C	36749	0.996581	0.0203533	0.866354	NA
CVD	Overall	3	WDR82	protein_coding	intronic	52305719	rs71297387	G	A	G	381994	1.00842	0.0110109	0.44643	NA
CVD	noDM	3	WDR82	protein_coding	intronic	52305719	rs71297387	G	A	G	345245	1.00462	0.0116469	0.692252	NA
CVD	DM	3	WDR82	protein_coding	intronic	52305719	rs71297387	G	A	G	36749	1.04233	0.0340632	0.223561	NA
CVD	Overall	3	WDR82	protein_coding	intronic	52321809	rs141250728	C	A	C	381994	1.01733	0.0214719	0.423474	NA
CVD	Overall	3	GLYCTK	protein_coding	5upstream,intronic	52321809	rs141250728	C	A	C	381994	1.01733	0.0214719	0.423474	NA
CVD	noDM	3	WDR82	protein_coding	intronic	52321809	rs141250728	C	A	C	345245	1.03165	0.0226672	0.169254	NA
CVD	noDM	3	GLYCTK	protein_coding	5upstream,intronic	52321809	rs141250728	C	A	C	345245	1.03165	0.0226672	0.169254	NA
CVD	DM	3	WDR82	protein_coding	intronic	52321809	rs141250728	C	A	C	36749	0.903988	0.065674	0.124298	NA
CVD	DM	3	GLYCTK	protein_coding	5upstream,intronic	52321809	rs141250728	C	A	C	36749	0.903988	0.065674	0.124298	NA
CVD	Overall	3	NT5DC2	protein_coding	5upstream,non-coding intronic,3downstream,non-coding,intronic	52559705	rs11709284	A	G	G	381994	0.996136	0.00505258	0.443477	NA
CVD	noDM	3	NT5DC2	protein_coding	5upstream,non-coding intronic,3downstream,non-coding,intronic	52559705	rs11709284	A	G	G	345245	0.998811	0.0053366	0.823557	NA
CVD	DM	3	NT5DC2	protein_coding	5upstream,non-coding intronic,3downstream,non-coding,intronic	52559705	rs11709284	A	G	G	36749	0.973808	0.015731	0.09157	NA
CVD	Overall	3	SMIM4	protein_coding	5upstream,non-coding,non-coding intronic	52568805	rs7639267	T	G	G	381994	0.996308	0.00505711	0.464506	NA
CVD	Overall	3	NT5DC2	protein_coding	5upstream,5utr	52568805	rs7639267	T	G	G	381994	0.996308	0.00505711	0.464506	NA
CVD	noDM	3	SMIM4	protein_coding	5upstream,non-coding,non-coding intronic	52568805	rs7639267	T	G	G	345245	0.999077	0.00534143	0.862785	NA
CVD	noDM	3	NT5DC2	protein_coding	5upstream,5utr	52568805	rs7639267	T	G	G	345245	0.999077	0.00534143	0.862785	NA
CVD	DM	3	SMIM4	protein_coding	5upstream,non-coding,non-coding intronic	52568805	rs7639267	T	G	G	36749	0.973213	0.0157437	0.0845874	NA
CVD	DM	3	NT5DC2	protein_coding	5upstream,5utr	52568805	rs7639267	T	G	G	36749	0.973213	0.0157437	0.0845874	NA
CVD	Overall	3	SMIM4	protein_coding	intronic	52611554	rs34735556	T	G	T	381994	0.997643	0.00893511	0.791716	NA
CVD	Overall	3	PBRM1	protein_coding	intronic	52611554	rs34735556	T	G	T	381994	0.997643	0.00893511	0.791716	NA
CVD	noDM	3	SMIM4	protein_coding	intronic	52611554	rs34735556	T	G	T	345245	1.00335	0.0094219	0.722806	NA
CVD	noDM	3	PBRM1	protein_coding	intronic	52611554	rs34735556	T	G	T	345245	1.00335	0.0094219	0.722806	NA
CVD	DM	3	SMIM4	protein_coding	intronic	52611554	rs34735556	T	G	T	36749	0.948655	0.0279968	0.0597388	NA
CVD	DM	3	PBRM1	protein_coding	intronic	52611554	rs34735556	T	G	T	36749	0.948655	0.0279968	0.0597388	NA
CVD	Overall	3	SMIM4	protein_coding	intronic	52612178	rs34115864	G	A	G	381994	1.011	0.00517354	0.0344318	NA
CVD	Overall	3	PBRM1	protein_coding	intronic	52612178	rs34115864	G	A	G	381994	1.011	0.00517354	0.0344318	NA
CVD	noDM	3	SMIM4	protein_coding	intronic	52612178	rs34115864	G	A	G	345245	1.00661	0.00546562	0.227875	NA
CVD	noDM	3	PBRM1	protein_coding	intronic	52612178	rs34115864	G	A	G	345245	1.00661	0.00546562	0.227875	NA
CVD	DM	3	SMIM4	protein_coding	intronic	52612178	rs34115864	G	A	G	36749	1.049	0.0161145	0.00299186	NA
CVD	DM	3	PBRM1	protein_coding	intronic	52612178	rs34115864	G	A	G	36749	1.049	0.0161145	0.00299186	NA
CVD	Overall	3	TKT	protein_coding	5upstream,intronic,non-coding intronic	53277859	rs79453591	A	C	A	381994	0.976343	0.0102942	0.0200361	NA
CVD	noDM	3	TKT	protein_coding	5upstream,intronic,non-coding intronic	53277859	rs79453591	A	C	A	345245	0.981676	0.0108685	0.0888337	NA
CVD	DM	3	TKT	protein_coding	5upstream,intronic,non-coding intronic	53277859	rs79453591	A	C	A	36749	0.931554	0.031931	0.0263877	NA
CVD	Overall	3	CHDH	protein_coding	3utr	53850005	rs11130381	T	C	C	381994	0.973105	0.00505018	6.7214e-08	NA
CVD	noDM	3	CHDH	protein_coding	3utr	53850005	rs11130381	T	C	C	345245	0.973967	0.00533349	7.58549e-07	3:53846617_GGTAA_G(1),rs877483(1),rs877484(1),rs78659222(1),rs893363(1),rs14165(1),rs893362(1),rs920252(1),rs4687587(1),rs12485510(1),rs11714712(1),rs10626142(1),rs7625247(1),rs9836592(1),rs6445606(1),rs2241808(1),rs2241807(1),rs12676(1),rs2276838(1),rs7626693(1),rs2196663(1),rs11718497(1),rs4687750(1),rs35518479(1),rs56052250(1),rs55974100(1),3:53875069_CT_C(1),rs2118421(1),rs6801605(1),rs644560…
CVD	DM	3	CHDH	protein_coding	3utr	53850005	rs11130381	T	C	C	36749	0.965482	0.0157436	0.025665	NA
CVD	Overall	3	CHDH	protein_coding	3utr	53850855	rs11714712	T	A	A	381994	0.972903	0.00507808	6.31111e-08	3:53846617_GGTAA_G(1),rs877483(1),rs877484(1),rs78659222(1),rs893363(1),rs14165(1),rs893362(1),rs920252(1),rs4687587(1),rs11130381(1),rs12485510(1),rs7625247(1),rs9836592(1),rs6445606(1),rs2241808(1),rs2241807(1),rs12676(1),rs2276838(1),rs7626693(1),rs2196663(1),rs11718497(1),rs4687750(1),rs35518479(1),rs56052250(1),rs55974100(1),3:53875069_CT_C(1),rs2118421(1),rs6801605(1),rs6445607(1),rs7689472…
CVD	noDM	3	CHDH	protein_coding	3utr	53850855	rs11714712	T	A	A	345245	0.974087	0.00536318	9.81005e-07	NA
CVD	DM	3	CHDH	protein_coding	3utr	53850855	rs11714712	T	A	A	36749	0.962771	0.0158268	0.0165225	NA
CVD	Overall	3	ABHD6	protein_coding	intronic	58228628	rs4681671	T	G	T	381994	1.00408	0.00506359	0.421283	NA
CVD	noDM	3	ABHD6	protein_coding	intronic	58228628	rs4681671	T	G	T	345245	1.00222	0.00534626	0.678667	NA
CVD	DM	3	ABHD6	protein_coding	intronic	58228628	rs4681671	T	G	T	36749	1.02087	0.0158271	0.191962	NA
CVD	Overall	3	PDHB	protein_coding	3downstream,non-coding intronic,intronic	58415031	rs11719957	G	A	G	381994	0.985803	0.00914027	0.117743	NA
CVD	noDM	3	PDHB	protein_coding	3downstream,non-coding intronic,intronic	58415031	rs11719957	G	A	G	345245	0.986611	0.00965015	0.162481	NA
CVD	DM	3	PDHB	protein_coding	3downstream,non-coding intronic,intronic	58415031	rs11719957	G	A	G	36749	0.978222	0.028528	0.440223	NA
CVD	Overall	3	PDHB	protein_coding	3utr,non-coding,3downstream,intronic,non-coding intronic	58415567	rs4585221	T	C	T	381994	0.985883	0.00914005	0.119827	NA
CVD	noDM	3	PDHB	protein_coding	3utr,non-coding,3downstream,intronic,non-coding intronic	58415567	rs4585221	T	C	T	345245	0.986686	0.00964992	0.164844	NA
CVD	DM	3	PDHB	protein_coding	3utr,non-coding,3downstream,intronic,non-coding intronic	58415567	rs4585221	T	C	T	36749	0.978344	0.0285277	0.4428	NA
CVD	Overall	3	ATXN7	protein_coding	intronic,non-coding intronic	63884292	rs832197	T	C	C	381994	1.00675	0.00542456	0.214826	NA
CVD	noDM	3	ATXN7	protein_coding	intronic,non-coding intronic	63884292	rs832197	T	C	C	345245	1.00966	0.00572176	0.0930635	NA
CVD	DM	3	ATXN7	protein_coding	intronic,non-coding intronic	63884292	rs832197	T	C	C	36749	0.982988	0.0170637	0.314645	NA
CVD	Overall	3	SLC25A26	protein_coding	non-coding intronic,intronic	66362386	rs56250028	G	A	G	381994	0.998634	0.00574623	0.811944	NA
CVD	noDM	3	SLC25A26	protein_coding	non-coding intronic,intronic	66362386	rs56250028	G	A	G	345245	0.997984	0.0060634	0.739288	NA
CVD	DM	3	SLC25A26	protein_coding	non-coding intronic,intronic	66362386	rs56250028	G	A	G	36749	1.00474	0.018058	0.793444	NA
CVD	Overall	3	GSK3B	protein_coding	non-coding intronic,intronic	119546455	rs56254723	AT	A	A	381994	1.00396	0.00862042	0.646471	NA
CVD	noDM	3	GSK3B	protein_coding	non-coding intronic,intronic	119546455	rs56254723	AT	A	A	345245	1.00273	0.00909817	0.764378	NA
CVD	DM	3	GSK3B	protein_coding	non-coding intronic,intronic	119546455	rs56254723	AT	A	A	36749	1.01633	0.0270724	0.549684	NA
CVD	Overall	3	GSK3B	protein_coding	intronic	119711992	rs540364070	GA	G	GA	381994	1.0018	0.00629051	0.775172	NA
CVD	noDM	3	GSK3B	protein_coding	intronic	119711992	rs540364070	GA	G	GA	345245	0.998464	0.00664647	0.817104	NA
CVD	DM	3	GSK3B	protein_coding	intronic	119711992	rs540364070	GA	G	GA	36749	1.03131	0.0196087	0.115946	NA
CVD	Overall	3	GSK3B	protein_coding	intronic	119797761	rs112003116	TACAC	T	TACAC	381994	0.987206	0.00625951	0.0396819	NA
CVD	noDM	3	GSK3B	protein_coding	intronic	119797761	rs112003116	TACAC	T	TACAC	345245	0.987978	0.00660679	0.0671478	NA
CVD	DM	3	GSK3B	protein_coding	intronic	119797761	rs112003116	TACAC	T	TACAC	36749	0.981575	0.0195981	0.342674	NA
CVD	Overall	3	CCDC58	protein_coding	non-coding intronic,intronic	122100023	rs9863881	T	C	T	381994	1.01946	0.00505832	0.000138741	NA
CVD	noDM	3	CCDC58	protein_coding	non-coding intronic,intronic	122100023	rs9863881	T	C	T	345245	1.01948	0.00533885	0.000301605	NA
CVD	DM	3	CCDC58	protein_coding	non-coding intronic,intronic	122100023	rs9863881	T	C	T	36749	1.01925	0.0158517	0.228982	NA
CVD	Overall	3	PARP9	protein_coding	intronic	122282569	rs9841897	C	T	C	381994	1.01084	0.00688276	0.117139	NA
CVD	noDM	3	PARP9	protein_coding	intronic	122282569	rs9841897	C	T	C	345245	1.0111	0.00726908	0.129023	NA
CVD	DM	3	PARP9	protein_coding	intronic	122282569	rs9841897	C	T	C	36749	1.00909	0.0214434	0.673144	NA
CVD	Overall	3	ITGB5	protein_coding	coding pepshift,non-coding,3downstream	124482494	rs745372859	T	TTTGTTGAAC	T	381994	1.00514	0.00751278	0.495296	NA
CVD	noDM	3	ITGB5	protein_coding	coding pepshift,non-coding,3downstream	124482494	rs745372859	T	TTTGTTGAAC	T	345245	1.00459	0.0079253	0.563447	NA
CVD	DM	3	ITGB5	protein_coding	coding pepshift,non-coding,3downstream	124482494	rs745372859	T	TTTGTTGAAC	T	36749	1.00989	0.02367	0.677514	NA
CVD	Overall	3	ITGB5	protein_coding	intronic	124594955	rs1948696	C	T	T	381994	1.01885	0.00518134	0.000312128	NA
CVD	noDM	3	ITGB5	protein_coding	intronic	124594955	rs1948696	C	T	T	345245	1.01939	0.00547075	0.000448774	NA
CVD	DM	3	ITGB5	protein_coding	intronic	124594955	rs1948696	C	T	T	36749	1.01483	0.0161807	0.362903	NA
CVD	Overall	3	ITGB5	protein_coding	5upstream,intronic	124606753	rs4679113	A	T	T	381994	1.01854	0.0052233	0.000437017	NA
CVD	noDM	3	ITGB5	protein_coding	5upstream,intronic	124606753	rs4679113	A	T	T	345245	1.01863	0.00551499	0.000816829	NA
CVD	DM	3	ITGB5	protein_coding	5upstream,intronic	124606753	rs4679113	A	T	T	36749	1.01853	0.016316	0.260418	NA
CVD	Overall	3	ITGB5	protein_coding	intronic,non-coding intronic	124614317	rs9869147	T	C	T	381994	0.981168	0.00515184	0.000224019	NA
CVD	noDM	3	ITGB5	protein_coding	intronic,non-coding intronic	124614317	rs9869147	T	C	T	345245	0.978663	0.00543936	7.33626e-05	NA
CVD	DM	3	ITGB5	protein_coding	intronic,non-coding intronic	124614317	rs9869147	T	C	T	36749	1.00312	0.0161125	0.846606	NA
CVD	Overall	3	EEFSEC	protein_coding	intronic,non-coding intronic	128039895	rs11708733	A	G	A	381994	0.938056	0.0119142	7.99853e-08	rs11711710(1),rs11719546(1),rs11709066(1),rs11716941(1),rs2999049(1),rs139076049(1),rs67575175(1),rs13071740(1),rs2955117(1),rs13077913(1),rs13077790(1),rs10934850(1),rs34409786(1),rs3122173(1),rs13067650(1),rs11706455(1),rs2999052(1),rs11715394(1),rs11712798(1),rs2687729(1),rs2811476(1),rs2811477(1),3:127898942_TG_T(1),rs2811478(1),rs2811479(1),rs2811480(1),rs2811481(1),rs2811516(1),rs2811515(1)…
CVD	noDM	3	EEFSEC	protein_coding	intronic,non-coding intronic	128039895	rs11708733	A	G	A	345245	0.933834	0.0125816	5.29826e-08	rs11711710(1),rs11719546(1),rs11709066(1),rs11716941(1),rs2999049(1),rs139076049(1),rs67575175(1),rs13071740(1),rs2955117(1),rs13077913(1),rs13077790(1),rs10934850(1),rs34409786(1),rs3122173(1),rs13067650(1),rs11706455(1),rs2999052(1),rs11715394(1),rs11712798(1),rs2687729(1),rs2811476(1),rs2811477(1),3:127898942_TG_T(1),rs2811478(1),rs2811479(1),rs2811480(1),rs2811481(1),rs2811516(1),rs2811515(1)…
CVD	DM	3	EEFSEC	protein_coding	intronic,non-coding intronic	128039895	rs11708733	A	G	A	36749	0.975334	0.037449	0.504818	NA
CVD	Overall	3	NPHP3	protein_coding	intronic	132288497	rs76651220	A	C	A	381994	1.01211	0.0118138	0.308153	NA
CVD	Overall	3	ACAD11	protein_coding	non-coding intronic,intronic	132288497	rs76651220	A	C	A	381994	1.01211	0.0118138	0.308153	NA
CVD	noDM	3	NPHP3	protein_coding	intronic	132288497	rs76651220	A	C	A	345245	1.01264	0.0124758	0.313889	NA
CVD	noDM	3	ACAD11	protein_coding	non-coding intronic,intronic	132288497	rs76651220	A	C	A	345245	1.01264	0.0124758	0.313889	NA
CVD	DM	3	NPHP3	protein_coding	intronic	132288497	rs76651220	A	C	A	36749	1.01195	0.0368051	0.746975	NA
CVD	DM	3	ACAD11	protein_coding	non-coding intronic,intronic	132288497	rs76651220	A	C	A	36749	1.01195	0.0368051	0.746975	NA
CVD	Overall	3	NPHP3	protein_coding	intronic	132345723	rs78240150	C	T	C	381994	0.996515	0.00899102	0.697804	NA
CVD	Overall	3	ACAD11	protein_coding	intronic,non-coding,non-coding intronic	132345723	rs78240150	C	T	C	381994	0.996515	0.00899102	0.697804	NA
CVD	noDM	3	NPHP3	protein_coding	intronic	132345723	rs78240150	C	T	C	345245	0.995762	0.00947623	0.653999	NA
CVD	noDM	3	ACAD11	protein_coding	intronic,non-coding,non-coding intronic	132345723	rs78240150	C	T	C	345245	0.995762	0.00947623	0.653999	NA
CVD	DM	3	NPHP3	protein_coding	intronic	132345723	rs78240150	C	T	C	36749	1.00137	0.0285681	0.961756	NA
CVD	DM	3	ACAD11	protein_coding	intronic,non-coding,non-coding intronic	132345723	rs78240150	C	T	C	36749	1.00137	0.0285681	0.961756	NA
CVD	Overall	3	PCCB	protein_coding	non-coding intronic,5upstream,non-coding,intronic,5utr	135974216	rs9844666	A	G	A	381994	1.00518	0.00588383	0.380204	NA
CVD	noDM	3	PCCB	protein_coding	non-coding intronic,5upstream,non-coding,intronic,5utr	135974216	rs9844666	A	G	A	345245	1.00054	0.00621808	0.930762	NA
CVD	DM	3	PCCB	protein_coding	non-coding intronic,5upstream,non-coding,intronic,5utr	135974216	rs9844666	A	G	A	36749	1.04608	0.0183219	0.0139426	NA
CVD	Overall	3	PCCB	protein_coding	5upstream,non-coding intronic,intronic	135976917	rs113793438	ATTTC	A	ATTTC	381994	1.01172	0.00530063	0.0279556	NA
CVD	noDM	3	PCCB	protein_coding	5upstream,non-coding intronic,intronic	135976917	rs113793438	ATTTC	A	ATTTC	345245	1.00756	0.00559953	0.178674	NA
CVD	DM	3	PCCB	protein_coding	5upstream,non-coding intronic,intronic	135976917	rs113793438	ATTTC	A	ATTTC	36749	1.04989	0.0165315	0.00322839	NA
CVD	Overall	3	PCCB	protein_coding	3downstream,non-coding intronic,intronic	135982096	rs372863955	GTT	G	G	381994	0.959358	0.00638732	8.25493e-11	NA
CVD	noDM	3	PCCB	protein_coding	3downstream,non-coding intronic,intronic	135982096	rs372863955	GTT	G	G	345245	0.959084	0.00674342	5.82415e-10	NA
CVD	DM	3	PCCB	protein_coding	3downstream,non-coding intronic,intronic	135982096	rs372863955	GTT	G	G	36749	0.961142	0.0199803	0.0472979	NA
CVD	Overall	3	PCCB	protein_coding	non-coding intronic,intronic	135983497	rs866782	T	C	T	381994	0.96066	0.00627318	1.57556e-10	NA
CVD	noDM	3	PCCB	protein_coding	non-coding intronic,intronic	135983497	rs866782	T	C	T	345245	0.960488	0.00662211	1.14508e-09	NA
CVD	DM	3	PCCB	protein_coding	non-coding intronic,intronic	135983497	rs866782	T	C	T	36749	0.961379	0.0196427	0.0449484	NA
CVD	Overall	3	PCCB	protein_coding	non-coding intronic,intronic	135986438	rs9872178	G	T	G	381994	1.00571	0.00587143	0.332128	NA
CVD	noDM	3	PCCB	protein_coding	non-coding intronic,intronic	135986438	rs9872178	G	T	G	345245	1.00153	0.00620477	0.805236	NA
CVD	DM	3	PCCB	protein_coding	non-coding intronic,intronic	135986438	rs9872178	G	T	G	36749	1.04259	0.018279	0.0225001	NA
CVD	Overall	3	PCCB	protein_coding	non-coding intronic,intronic	135998670	rs6785225	C	T	C	381994	1.01098	0.00530306	0.0395214	NA
CVD	noDM	3	PCCB	protein_coding	non-coding intronic,intronic	135998670	rs6785225	C	T	C	345245	1.00671	0.00560189	0.23246	NA
CVD	DM	3	PCCB	protein_coding	non-coding intronic,intronic	135998670	rs6785225	C	T	C	36749	1.05008	0.016545	0.00314438	NA
CVD	Overall	3	PCCB	protein_coding	3downstream,intronic,non-coding intronic	136003157	rs532597494	CTGATGT	C	C	381994	0.958443	0.00582977	3.32011e-13	rs548288(1),rs113793438(1),rs632016(1),rs7650071(1),3:135980420_GA_G(1),rs35681043(1),rs372863955(1),rs73222262(1),rs9826146(1),rs866782(1),rs28812220(1),rs606725(1),rs9872326(1),rs60614489(1),rs114968564(1),rs4678428(1),rs576771(1),rs67214626(1),rs650505(1),rs113630844(1),rs665200(1),rs489398(1),rs7628146(1),rs6785225(1),rs9843801(1),rs3821445(1),rs369720172(1),rs7653249(1),rs1279840(1),rs127942…
CVD	noDM	3	PCCB	protein_coding	3downstream,intronic,non-coding intronic	136003157	rs532597494	CTGATGT	C	C	345245	0.95996	0.0061539	3.12963e-11	NA
CVD	DM	3	PCCB	protein_coding	3downstream,intronic,non-coding intronic	136003157	rs532597494	CTGATGT	C	C	36749	0.944111	0.0182262	0.00160257	NA
CVD	Overall	3	PCCB	protein_coding	non-coding intronic,intronic	136027145	rs1618069	G	A	A	381994	0.958934	0.0058265	6.15404e-13	NA
CVD	noDM	3	PCCB	protein_coding	non-coding intronic,intronic	136027145	rs1618069	G	A	A	345245	0.959978	0.00615073	3.12201e-11	rs548288(1),rs632016(1),rs7650071(1),rs372863955(1),rs866782(1),rs606725(1),rs114968564(1),rs4678428(1),rs576771(1),rs650505(1),rs113630844(1),rs665200(1),rs489398(1),rs7628146(1),rs3821445(1),rs532597494(1),rs369720172(1),rs7653249(1),rs1279840(1),rs1279425(1),rs9848883(1),rs12330635(1),rs17252498(1),rs13071085(1),rs71336055(1),rs1711171(1),rs9856769(1),rs1291921(1),rs61789606(1),rs483465(1),rs6…
CVD	DM	3	PCCB	protein_coding	non-coding intronic,intronic	136027145	rs1618069	G	A	A	36749	0.948736	0.0182162	0.00386611	NA
CVD	Overall	3	PARL	protein_coding	non-coding intronic,intronic	183593456	rs7635679	C	T	T	381994	1.01344	0.00505062	0.00821237	NA
CVD	noDM	3	PARL	protein_coding	non-coding intronic,intronic	183593456	rs7635679	C	T	T	345245	1.01195	0.0053345	0.0259477	NA
CVD	DM	3	PARL	protein_coding	non-coding intronic,intronic	183593456	rs7635679	C	T	T	36749	1.02714	0.0157371	0.0888186	NA
CVD	Overall	3	TP63	protein_coding	intronic,non-coding intronic	189389626	rs1920280	C	T	C	381994	0.986504	0.00510989	0.00783489	NA
CVD	noDM	3	TP63	protein_coding	intronic,non-coding intronic	189389626	rs1920280	C	T	C	345245	0.987681	0.00539354	0.0215523	NA
CVD	DM	3	TP63	protein_coding	intronic,non-coding intronic	189389626	rs1920280	C	T	C	36749	0.976588	0.0160001	0.138694	NA
CVD	Overall	4	NOP14	protein_coding	intronic	2956963	rs71597204	G	A	G	381994	0.982929	0.0051237	0.000777889	NA
CVD	Overall	4	NOP14-AS1	antisense	non-coding intronic	2956963	rs71597204	G	A	G	381994	0.982929	0.0051237	0.000777889	NA
CVD	noDM	4	NOP14	protein_coding	intronic	2956963	rs71597204	G	A	G	345245	0.984538	0.00540953	0.00396799	NA
CVD	noDM	4	NOP14-AS1	antisense	non-coding intronic	2956963	rs71597204	G	A	G	345245	0.984538	0.00540953	0.00396799	NA
CVD	DM	4	NOP14	protein_coding	intronic	2956963	rs71597204	G	A	G	36749	0.969995	0.0160068	0.0570089	NA
CVD	DM	4	NOP14-AS1	antisense	non-coding intronic	2956963	rs71597204	G	A	G	36749	0.969995	0.0160068	0.0570089	NA
CVD	Overall	4	NOP14	protein_coding	intronic	2962452	rs35681707	T	C	T	381994	0.981786	0.00538575	0.000642233	NA
CVD	Overall	4	NOP14-AS1	antisense	non-coding intronic	2962452	rs35681707	T	C	T	381994	0.981786	0.00538575	0.000642233	NA
CVD	noDM	4	NOP14	protein_coding	intronic	2962452	rs35681707	T	C	T	345245	0.983175	0.00568537	0.00284014	NA
CVD	noDM	4	NOP14-AS1	antisense	non-coding intronic	2962452	rs35681707	T	C	T	345245	0.983175	0.00568537	0.00284014	NA
CVD	DM	4	NOP14	protein_coding	intronic	2962452	rs35681707	T	C	T	36749	0.971501	0.0168399	0.0859952	NA
CVD	DM	4	NOP14-AS1	antisense	non-coding intronic	2962452	rs35681707	T	C	T	36749	0.971501	0.0168399	0.0859952	NA
CVD	Overall	4	HTT	protein_coding	non-coding intronic,intronic	3138200	rs369081036	GAAA	G	GAAA	381994	1.00552	0.0114103	0.629592	NA
CVD	noDM	4	HTT	protein_coding	non-coding intronic,intronic	3138200	rs369081036	GAAA	G	GAAA	345245	1.01294	0.0120265	0.285229	NA
CVD	DM	4	HTT	protein_coding	non-coding intronic,intronic	3138200	rs369081036	GAAA	G	GAAA	36749	0.941133	0.0357589	0.0897577	NA
CVD	Overall	4	HTT	protein_coding	intronic,non-coding intronic	3140409	rs113928896	T	C	T	381994	0.979781	0.00737248	0.00559559	NA
CVD	noDM	4	HTT	protein_coding	intronic,non-coding intronic	3140409	rs113928896	T	C	T	345245	0.981719	0.00778332	0.0177644	NA
CVD	DM	4	HTT	protein_coding	intronic,non-coding intronic	3140409	rs113928896	T	C	T	36749	0.964896	0.023005	0.120342	NA
CVD	Overall	4	HTT	protein_coding	intronic,non-coding intronic	3141410	rs363064	T	C	T	381994	0.986685	0.00547682	0.0143825	NA
CVD	noDM	4	HTT	protein_coding	intronic,non-coding intronic	3141410	rs363064	T	C	T	345245	0.986749	0.00577924	0.0209864	NA
CVD	DM	4	HTT	protein_coding	intronic,non-coding intronic	3141410	rs363064	T	C	T	36749	0.987603	0.0171987	0.468267	NA
CVD	Overall	4	DOK7	protein_coding	intronic,non-coding intronic	3469341	rs10937926	A	G	A	381994	1.01043	0.00502802	0.0389725	NA
CVD	noDM	4	DOK7	protein_coding	intronic,non-coding intronic	3469341	rs10937926	A	G	A	345245	1.01079	0.00530984	0.0432857	NA
CVD	DM	4	DOK7	protein_coding	intronic,non-coding intronic	3469341	rs10937926	A	G	A	36749	1.00893	0.0156822	0.57098	NA
CVD	Overall	4	DOK7	protein_coding	non-coding intronic,intronic	3469348	rs56298023	T	C	T	381994	0.973009	0.00985932	0.00551699	NA
CVD	noDM	4	DOK7	protein_coding	non-coding intronic,intronic	3469348	rs56298023	T	C	T	345245	0.973111	0.0104101	0.00883628	NA
CVD	DM	4	DOK7	protein_coding	non-coding intronic,intronic	3469348	rs56298023	T	C	T	36749	0.974645	0.0308012	0.404392	NA
CVD	Overall	4	DOK7	protein_coding	intronic,non-coding intronic	3469443	rs10937927	G	A	G	381994	1.01026	0.00501779	0.0419586	NA
CVD	noDM	4	DOK7	protein_coding	intronic,non-coding intronic	3469443	rs10937927	G	A	G	345245	1.0105	0.00529872	0.0487856	NA
CVD	DM	4	DOK7	protein_coding	intronic,non-coding intronic	3469443	rs10937927	G	A	G	36749	1.00973	0.0156572	0.536205	NA
CVD	Overall	4	DOK7	protein_coding	non-coding intronic,intronic	3469976	rs62275881	C	A	C	381994	1.02025	0.00572385	0.000462196	NA
CVD	noDM	4	DOK7	protein_coding	non-coding intronic,intronic	3469976	rs62275881	C	A	C	345245	1.02452	0.00604066	6.05193e-05	NA
CVD	DM	4	DOK7	protein_coding	non-coding intronic,intronic	3469976	rs62275881	C	A	C	36749	0.984427	0.0178934	0.380405	NA
CVD	Overall	4	DOK7	protein_coding	intronic,non-coding intronic	3470174	rs139750425	TCTGC	T	TCTGC	381994	1.02005	0.0057547	0.000560806	NA
CVD	noDM	4	DOK7	protein_coding	intronic,non-coding intronic	3470174	rs139750425	TCTGC	T	TCTGC	345245	1.02427	0.00607324	7.86937e-05	NA
CVD	DM	4	DOK7	protein_coding	intronic,non-coding intronic	3470174	rs139750425	TCTGC	T	TCTGC	36749	0.984628	0.0179897	0.389178	NA
CVD	Overall	4	DOK7	protein_coding	non-coding intronic,intronic	3470604	rs36205397	G	A	G	381994	1.01278	0.00509988	0.0127412	NA
CVD	noDM	4	DOK7	protein_coding	non-coding intronic,intronic	3470604	rs36205397	G	A	G	345245	1.01584	0.00538411	0.00352179	NA
CVD	DM	4	DOK7	protein_coding	non-coding intronic,intronic	3470604	rs36205397	G	A	G	36749	0.985757	0.0159355	0.368018	NA
CVD	Overall	4	DOK7	protein_coding	intronic,non-coding intronic	3477082	rs79295655	A	G	A	381994	1.02289	0.0173786	0.192908	NA
CVD	noDM	4	DOK7	protein_coding	intronic,non-coding intronic	3477082	rs79295655	A	G	A	345245	1.02543	0.0183057	0.170162	NA
CVD	DM	4	DOK7	protein_coding	intronic,non-coding intronic	3477082	rs79295655	A	G	A	36749	1.00423	0.0551816	0.939047	NA
CVD	Overall	4	DOK7	protein_coding	non-coding intronic,intronic	3488992	rs1881801	G	A	A	381994	0.995265	0.00533114	0.373346	NA
CVD	noDM	4	DOK7	protein_coding	non-coding intronic,intronic	3488992	rs1881801	G	A	A	345245	0.995558	0.00563127	0.42915	NA
CVD	DM	4	DOK7	protein_coding	non-coding intronic,intronic	3488992	rs1881801	G	A	A	36749	0.993844	0.0165933	0.709778	NA
CVD	Overall	4	DOK7	protein_coding	non-coding intronic,intronic	3489875	rs1881800	T	C	T	381994	0.994557	0.00503421	0.278279	NA
CVD	noDM	4	DOK7	protein_coding	non-coding intronic,intronic	3489875	rs1881800	T	C	T	345245	0.991804	0.00531553	0.12154	NA
CVD	DM	4	DOK7	protein_coding	non-coding intronic,intronic	3489875	rs1881800	T	C	T	36749	1.01706	0.0157298	0.282167	NA
CVD	Overall	4	DOK7	protein_coding	intronic,non-coding intronic	3490072	rs2857984	T	A	A	381994	0.995637	0.00532616	0.411623	NA
CVD	noDM	4	DOK7	protein_coding	intronic,non-coding intronic	3490072	rs2857984	T	A	A	345245	0.995836	0.00562611	0.458277	NA
CVD	DM	4	DOK7	protein_coding	intronic,non-coding intronic	3490072	rs2857984	T	A	A	36749	0.994905	0.016576	0.75797	NA
CVD	Overall	4	DOK7	protein_coding	5upstream,non-coding intronic,intronic	3493542	rs2699417	A	T	A	381994	1.00416	0.00504172	0.410207	NA
CVD	noDM	4	DOK7	protein_coding	5upstream,non-coding intronic,intronic	3493542	rs2699417	A	T	A	345245	1.00561	0.00532282	0.293577	NA
CVD	DM	4	DOK7	protein_coding	5upstream,non-coding intronic,intronic	3493542	rs2699417	A	T	A	36749	0.99082	0.0157599	0.558419	NA
CVD	Overall	4	OCIAD1	protein_coding	intronic	48808989	rs13141838	T	C	C	381994	0.985865	0.00503552	0.00469816	NA
CVD	noDM	4	OCIAD1	protein_coding	intronic	48808989	rs13141838	T	C	C	345245	0.985822	0.00531701	0.0072406	NA
CVD	DM	4	OCIAD1	protein_coding	intronic	48808989	rs13141838	T	C	C	36749	0.988024	0.015723	0.443489	NA
CVD	Overall	4	ALB	protein_coding	intronic,5upstream,3downstream,non-coding intronic	74282652	rs55637321	T	C	T	381994	0.983602	0.0156264	0.290027	NA
CVD	noDM	4	ALB	protein_coding	intronic,5upstream,3downstream,non-coding intronic	74282652	rs55637321	T	C	T	345245	0.983581	0.0165197	0.316263	NA
CVD	DM	4	ALB	protein_coding	intronic,5upstream,3downstream,non-coding intronic	74282652	rs55637321	T	C	T	36749	0.984269	0.048323	0.742816	NA
CVD	Overall	4	THAP9	protein_coding	intronic,3downstream	83830244	rs60909079	C	G	C	381994	0.980301	0.00575391	0.000544724	NA
CVD	noDM	4	THAP9	protein_coding	intronic,3downstream	83830244	rs60909079	C	G	C	345245	0.981639	0.00607745	0.00229384	NA
CVD	DM	4	THAP9	protein_coding	intronic,3downstream	83830244	rs60909079	C	G	C	36749	0.968335	0.0178993	0.0722265	NA
CVD	Overall	4	MAPK10	protein_coding	non-coding intronic,intronic	87240063	rs141031540	TA	T	TA	381994	1.00645	0.00523337	0.219238	NA
CVD	noDM	4	MAPK10	protein_coding	non-coding intronic,intronic	87240063	rs141031540	TA	T	TA	345245	1.00587	0.00552651	0.289195	NA
CVD	DM	4	MAPK10	protein_coding	non-coding intronic,intronic	87240063	rs141031540	TA	T	TA	36749	1.01111	0.0163311	0.498637	NA
CVD	Overall	4	MAPK10	protein_coding	non-coding intronic,intronic	87242057	rs62307367	T	C	T	381994	1.00554	0.00520772	0.28908	NA
CVD	noDM	4	MAPK10	protein_coding	non-coding intronic,intronic	87242057	rs62307367	T	C	T	345245	1.00466	0.0054994	0.397546	NA
CVD	DM	4	MAPK10	protein_coding	non-coding intronic,intronic	87242057	rs62307367	T	C	T	36749	1.01287	0.016254	0.43138	NA
CVD	Overall	4	MAPK10	protein_coding	intronic,non-coding intronic	87269712	rs62307409	G	A	G	381994	1.00112	0.00585476	0.847913	NA
CVD	noDM	4	MAPK10	protein_coding	intronic,non-coding intronic	87269712	rs62307409	G	A	G	345245	0.998829	0.00618313	0.849668	NA
CVD	DM	4	MAPK10	protein_coding	intronic,non-coding intronic	87269712	rs62307409	G	A	G	36749	1.02138	0.0182951	0.247533	NA
CVD	Overall	4	MAPK10	protein_coding	non-coding intronic,intronic	87294293	rs72663972	A	C	A	381994	1.0049	0.00520877	0.348219	NA
CVD	noDM	4	MAPK10	protein_coding	non-coding intronic,intronic	87294293	rs72663972	A	C	A	345245	1.00404	0.00550036	0.463015	NA
CVD	DM	4	MAPK10	protein_coding	non-coding intronic,intronic	87294293	rs72663972	A	C	A	36749	1.01217	0.0162596	0.456924	NA
CVD	Overall	4	MAPK10	protein_coding	non-coding intronic,intronic	87398449	rs13109115	C	T	C	381994	0.993098	0.00791211	0.38138	NA
CVD	noDM	4	MAPK10	protein_coding	non-coding intronic,intronic	87398449	rs13109115	C	T	C	345245	0.992021	0.00835755	0.337801	NA
CVD	DM	4	MAPK10	protein_coding	non-coding intronic,intronic	87398449	rs13109115	C	T	C	36749	1.00373	0.0246714	0.880114	NA
CVD	Overall	4	MAPK10	protein_coding	non-coding intronic,intronic	87413424	rs2869441	G	A	A	381994	0.988388	0.00768055	0.128329	NA
CVD	noDM	4	MAPK10	protein_coding	non-coding intronic,intronic	87413424	rs2869441	G	A	A	345245	0.987975	0.00811383	0.135967	NA
CVD	DM	4	MAPK10	protein_coding	non-coding intronic,intronic	87413424	rs2869441	G	A	A	36749	0.993609	0.0239068	0.788544	NA
CVD	Overall	4	MAPK10	protein_coding	non-coding intronic,intronic	87438563	rs7661663	G	A	A	381994	0.988464	0.00767888	0.130786	NA
CVD	noDM	4	MAPK10	protein_coding	non-coding intronic,intronic	87438563	rs7661663	G	A	A	345245	0.988035	0.00811241	0.137874	NA
CVD	DM	4	MAPK10	protein_coding	non-coding intronic,intronic	87438563	rs7661663	G	A	A	36749	0.993777	0.0238934	0.79388	NA
CVD	Overall	4	MAPK10	protein_coding	intronic,non-coding intronic	87502391	rs74678260	G	A	G	381994	0.999938	0.0062271	0.992023	NA
CVD	noDM	4	MAPK10	protein_coding	intronic,non-coding intronic	87502391	rs74678260	G	A	G	345245	0.999883	0.00657676	0.985759	NA
CVD	DM	4	MAPK10	protein_coding	intronic,non-coding intronic	87502391	rs74678260	G	A	G	36749	0.998721	0.0194044	0.94743	NA
CVD	Overall	4	NUDT9	protein_coding	intronic,non-coding intronic	88367239	rs114460567	T	C	T	381994	1.00277	0.00792593	0.727409	NA
CVD	noDM	4	NUDT9	protein_coding	intronic,non-coding intronic	88367239	rs114460567	T	C	T	345245	1.00343	0.00837228	0.682496	NA
CVD	DM	4	NUDT9	protein_coding	intronic,non-coding intronic	88367239	rs114460567	T	C	T	36749	0.996003	0.0246425	0.8709	NA
CVD	Overall	4	ADH5	protein_coding	5upstream,non-coding intronic,non-coding,3utr,intronic	100006645	rs1154410	G	A	A	381994	1.01136	0.00565085	0.0456418	NA
CVD	noDM	4	ADH5	protein_coding	5upstream,non-coding intronic,non-coding,3utr,intronic	100006645	rs1154410	G	A	A	345245	1.01175	0.00596514	0.0501214	NA
CVD	DM	4	ADH5	protein_coding	5upstream,non-coding intronic,non-coding,3utr,intronic	100006645	rs1154410	G	A	A	36749	1.00691	0.0176777	0.696975	NA
CVD	Overall	4	ADH5	protein_coding	intronic,non-coding intronic	100009596	rs1154402	G	C	G	381994	0.993025	0.00507667	0.167985	NA
CVD	noDM	4	ADH5	protein_coding	intronic,non-coding intronic	100009596	rs1154402	G	C	G	345245	0.993974	0.00535989	0.259454	NA
CVD	DM	4	ADH5	protein_coding	intronic,non-coding intronic	100009596	rs1154402	G	C	G	36749	0.984862	0.0158684	0.336423	NA
CVD	Overall	4	PPP3CA	protein_coding	intronic	102084331	rs1527351	C	T	C	381994	0.99051	0.00529492	0.0717262	NA
CVD	noDM	4	PPP3CA	protein_coding	intronic	102084331	rs1527351	C	T	C	345245	0.990124	0.00558938	0.0757733	NA
CVD	DM	4	PPP3CA	protein_coding	intronic	102084331	rs1527351	C	T	C	36749	0.994031	0.0165804	0.718034	NA
CVD	Overall	4	SLC39A8	protein_coding	intronic,coding nonsyn	103184239	rs112519623	A	G	A	381994	0.970518	0.0199377	0.133369	NA
CVD	noDM	4	SLC39A8	protein_coding	intronic,coding nonsyn	103184239	rs112519623	A	G	A	345245	0.961686	0.0211062	0.0641709	NA
CVD	DM	4	SLC39A8	protein_coding	intronic,coding nonsyn	103184239	rs112519623	A	G	A	36749	1.05042	0.0619192	0.426953	NA
CVD	Overall	4	SLC39A8	protein_coding	coding nonsyn|nonsyn	103188709	rs13107325	T	C	T	381994	0.940668	0.00962878	2.12095e-10	rs151390(1),rs13135092(1),4:103207707_TA_T(1),rs13105581(1),rs13118152(1),rs34333163(1),rs13114461(1),rs13114738(1),rs13135688(1),rs13143234(1),rs13109272(1),rs71621626(1),rs13119968(1),rs12510679(1)
CVD	noDM	4	SLC39A8	protein_coding	coding nonsyn|nonsyn	103188709	rs13107325	T	C	T	345245	0.937063	0.0102052	1.89271e-10	rs151390(1),rs13135092(1),4:103207707_TA_T(1),rs233815(1),rs233811(1),rs233809(1),rs233808(1),rs233805(1),rs233804(1),rs13105581(1),rs13118152(1),rs34333163(1),rs13114461(1),rs13114738(1),rs13135688(1),rs13143234(1),rs13109272(1),rs71621626(1),rs12510679(1)
CVD	DM	4	SLC39A8	protein_coding	coding nonsyn|nonsyn	103188709	rs13107325	T	C	T	36749	0.970874	0.0293384	0.313686	NA
CVD	Overall	4	SLC39A8	protein_coding	intronic,non-coding intronic	103191376	rs5860722	CA	C	CA	381994	1.01344	0.00505157	0.0082387	NA
CVD	noDM	4	SLC39A8	protein_coding	intronic,non-coding intronic	103191376	rs5860722	CA	C	CA	345245	1.01378	0.00533375	0.0103129	NA
CVD	DM	4	SLC39A8	protein_coding	intronic,non-coding intronic	103191376	rs5860722	CA	C	CA	36749	1.01059	0.0157802	0.504214	NA
CVD	Overall	4	SLC39A8	protein_coding	non-coding intronic,intronic	103232168	rs13103835	C	T	C	381994	0.992484	0.00531234	0.155577	NA
CVD	noDM	4	SLC39A8	protein_coding	non-coding intronic,intronic	103232168	rs13103835	C	T	C	345245	0.991036	0.00561192	0.108583	NA
CVD	DM	4	SLC39A8	protein_coding	non-coding intronic,intronic	103232168	rs13103835	C	T	C	36749	1.00514	0.0165366	0.756607	NA
CVD	Overall	4	SLC39A8	protein_coding	non-coding intronic	103293738	rs537107181	C	T	C	381994	0.866878	0.0281935	4.04071e-07	NONE
CVD	noDM	4	SLC39A8	protein_coding	non-coding intronic	103293738	rs537107181	C	T	C	345245	0.859272	0.0298841	3.86985e-07	NONE
CVD	DM	4	SLC39A8	protein_coding	non-coding intronic	103293738	rs537107181	C	T	C	36749	0.935032	0.0864233	0.437001	NA
CVD	Overall	4	SLC39A8	protein_coding	non-coding intronic	103336344	rs143546063	A	G	A	381994	1.01712	0.00667185	0.0109466	NA
CVD	noDM	4	SLC39A8	protein_coding	non-coding intronic	103336344	rs143546063	A	G	A	345245	1.01946	0.00704109	0.00619085	NA
CVD	DM	4	SLC39A8	protein_coding	non-coding intronic	103336344	rs143546063	A	G	A	36749	0.996077	0.0208748	0.850634	NA
CVD	Overall	4	CISD2	protein_coding	intronic	103800194	rs223322	A	G	A	381994	0.97581	0.00534839	4.68543e-06	NA
CVD	noDM	4	CISD2	protein_coding	intronic	103800194	rs223322	A	G	A	345245	0.98031	0.00564403	0.000426046	NA
CVD	DM	4	CISD2	protein_coding	intronic	103800194	rs223322	A	G	A	36749	0.939003	0.0167466	0.000171181	NA
CVD	Overall	4	CISD2	protein_coding	intronic	103802824	rs223317	C	T	C	381994	0.975654	0.00534827	4.05762e-06	NA
CVD	noDM	4	CISD2	protein_coding	intronic	103802824	rs223317	C	T	C	345245	0.980229	0.00564388	0.00040279	NA
CVD	DM	4	CISD2	protein_coding	intronic	103802824	rs223317	C	T	C	36749	0.938236	0.0167458	0.000140566	NA
CVD	Overall	4	SLC9B2	protein_coding	3downstream,3utr	103941075	rs34955446	C	T	C	381994	1.00934	0.0131109	0.478162	NA
CVD	noDM	4	SLC9B2	protein_coding	3downstream,3utr	103941075	rs34955446	C	T	C	345245	1.01329	0.0138481	0.340334	NA
CVD	DM	4	SLC9B2	protein_coding	3downstream,3utr	103941075	rs34955446	C	T	C	36749	0.976131	0.040597	0.551788	NA
CVD	Overall	4	SLC9B2	protein_coding	intronic	103942714	rs10516497	C	A	C	381994	0.976082	0.00634627	0.000136408	NA
CVD	noDM	4	SLC9B2	protein_coding	intronic	103942714	rs10516497	C	A	C	345245	0.978297	0.00669693	0.00105121	NA
CVD	DM	4	SLC9B2	protein_coding	intronic	103942714	rs10516497	C	A	C	36749	0.958989	0.0198802	0.0351695	NA
CVD	Overall	4	SLC9B2	protein_coding	intronic	103950425	rs1080081	T	C	T	381994	0.971497	0.00503184	9.09038e-09	rs1598861(1),rs230502(1),4:103511747_TG_T(1),rs4648050(1),rs4648051(1),rs4648055(1),rs4648058(1),rs4235405(1),rs4648068(1),rs3774963(1),rs7684888(1),rs538619139(1),rs11722146(1),rs12509403(1),rs12509517(1),rs3774967(1),rs4699031(1),rs4235406(1),rs3755867(1),rs9790601(1),rs7683854(1),rs3774968(1),rs3817685(1),rs4648133(1),rs1609798(1),rs223332(1),rs763166370(1),rs223331(1),rs223330(1),rs223329(1),…
CVD	noDM	4	SLC9B2	protein_coding	intronic	103950425	rs1080081	T	C	T	345245	0.97401	0.00531205	7.14858e-07	rs4648058(1),rs4648068(1),rs3774963(1),rs7684888(1),rs12509403(1),rs3774967(1),rs3755867(1),rs9790601(1),rs7683854(1),rs3817685(1),rs223332(1),rs763166370(1),rs223331(1),rs223330(1),rs223329(1),rs223328(1),rs223327(1),rs223326(1),rs223325(1),rs223324(1),rs2738926(1),rs2850599(1),rs223323(1),rs223322(1),rs384833(1),rs368629(1),rs223319(1),rs223318(1),rs223317(1),rs223316(1),rs223315(1),rs223314(1)…
CVD	DM	4	SLC9B2	protein_coding	intronic	103950425	rs1080081	T	C	T	36749	0.950703	0.0157421	0.00132106	NA
CVD	Overall	4	SLC9B2	protein_coding	intronic	103953389	rs1383732	G	A	G	381994	0.986537	0.00704996	0.0545199	NA
CVD	noDM	4	SLC9B2	protein_coding	intronic	103953389	rs1383732	G	A	G	345245	0.983077	0.00744158	0.021814	NA
CVD	DM	4	SLC9B2	protein_coding	intronic	103953389	rs1383732	G	A	G	36749	1.01602	0.0221757	0.473672	NA
CVD	Overall	4	SLC9B2	protein_coding	intronic	103954109	rs113733701	T	C	T	381994	0.984339	0.0223828	0.480659	NA
CVD	noDM	4	SLC9B2	protein_coding	intronic	103954109	rs113733701	T	C	T	345245	0.97493	0.0237009	0.28405	NA
CVD	DM	4	SLC9B2	protein_coding	intronic	103954109	rs113733701	T	C	T	36749	1.06112	0.069397	0.392596	NA
CVD	Overall	4	CCDC109B	protein_coding	non-coding intronic,intronic	110537251	rs36121800	C	T	C	381994	1.04728	0.0193844	0.0171683	NA
CVD	noDM	4	CCDC109B	protein_coding	non-coding intronic,intronic	110537251	rs36121800	C	T	C	345245	1.06305	0.0204539	0.00279501	NA
CVD	DM	4	CCDC109B	protein_coding	non-coding intronic,intronic	110537251	rs36121800	C	T	C	36749	0.921777	0.0594431	0.170608	NA
CVD	Overall	4	CCDC109B	protein_coding	non-coding intronic,intronic	110569620	rs78025076	T	C	T	381994	0.980001	0.017637	0.252037	NA
CVD	noDM	4	CCDC109B	protein_coding	non-coding intronic,intronic	110569620	rs78025076	T	C	T	345245	0.985039	0.0186144	0.418065	NA
CVD	DM	4	CCDC109B	protein_coding	non-coding intronic,intronic	110569620	rs78025076	T	C	T	36749	0.937279	0.0548481	0.237612	NA
CVD	Overall	4	CCDC109B	protein_coding	intronic,non-coding intronic,3downstream	110582100	rs17440280	C	T	C	381994	0.997634	0.00521236	0.649464	NA
CVD	noDM	4	CCDC109B	protein_coding	intronic,non-coding intronic,3downstream	110582100	rs17440280	C	T	C	345245	0.998026	0.00550276	0.719494	NA
CVD	DM	4	CCDC109B	protein_coding	intronic,non-coding intronic,3downstream	110582100	rs17440280	C	T	C	36749	0.994716	0.0162977	0.745101	NA
CVD	Overall	4	CCDC109B	protein_coding	non-coding intronic,intronic	110600672	rs28369312	T	C	T	381994	1.01395	0.00911347	0.128588	NA
CVD	noDM	4	CCDC109B	protein_coding	non-coding intronic,intronic	110600672	rs28369312	T	C	T	345245	1.01708	0.00962662	0.0785704	NA
CVD	DM	4	CCDC109B	protein_coding	non-coding intronic,intronic	110600672	rs28369312	T	C	T	36749	0.988437	0.0282407	0.680473	NA
CVD	Overall	4	RP11-557J10.4	antisense	non-coding intronic	146567584	rs17014946	G	T	G	381994	1.01098	0.00597718	0.0676299	NA
CVD	Overall	4	MMAA	protein_coding	non-coding,intronic	146567584	rs17014946	G	T	G	381994	1.01098	0.00597718	0.0676299	NA
CVD	noDM	4	RP11-557J10.4	antisense	non-coding intronic	146567584	rs17014946	G	T	G	345245	1.0115	0.00630978	0.0699976	NA
CVD	noDM	4	MMAA	protein_coding	non-coding,intronic	146567584	rs17014946	G	T	G	345245	1.0115	0.00630978	0.0699976	NA
CVD	DM	4	RP11-557J10.4	antisense	non-coding intronic	146567584	rs17014946	G	T	G	36749	1.00661	0.0186959	0.724381	NA
CVD	DM	4	MMAA	protein_coding	non-coding,intronic	146567584	rs17014946	G	T	G	36749	1.00661	0.0186959	0.724381	NA
CVD	Overall	4	PALLD	protein_coding	intronic	169708457	rs12331592	C	T	C	381994	1.02084	0.00510248	5.30375e-05	NA
CVD	noDM	4	PALLD	protein_coding	intronic	169708457	rs12331592	C	T	C	345245	1.02057	0.00538532	0.000156519	NA
CVD	DM	4	PALLD	protein_coding	intronic	169708457	rs12331592	C	T	C	36749	1.02376	0.0159998	0.142228	NA
CVD	Overall	4	CBR4	protein_coding	non-coding intronic,intronic	169876537	rs113614541	C	A	C	381994	0.970067	0.0210555	0.148927	NA
CVD	noDM	4	CBR4	protein_coding	non-coding intronic,intronic	169876537	rs113614541	C	A	C	345245	0.958737	0.0223105	0.0589296	NA
CVD	DM	4	CBR4	protein_coding	non-coding intronic,intronic	169876537	rs113614541	C	A	C	36749	1.07074	0.0651555	0.29418	NA
CVD	Overall	5	TERT	protein_coding	non-coding intronic,intronic	1280028	rs2242652	A	G	A	381994	1.02737	0.00639356	2.41288e-05	NA
CVD	noDM	5	TERT	protein_coding	non-coding intronic,intronic	1280028	rs2242652	A	G	A	345245	1.02755	0.00674708	5.64224e-05	NA
CVD	DM	5	TERT	protein_coding	non-coding intronic,intronic	1280028	rs2242652	A	G	A	36749	1.02623	0.0200545	0.196747	NA
CVD	Overall	5	TERT	protein_coding	non-coding intronic,intronic	1282414	rs7725218	A	G	A	381994	1.01423	0.00531027	0.00780178	NA
CVD	noDM	5	TERT	protein_coding	non-coding intronic,intronic	1282414	rs7725218	A	G	A	345245	1.01449	0.00560739	0.0103127	NA
CVD	DM	5	TERT	protein_coding	non-coding intronic,intronic	1282414	rs7725218	A	G	A	36749	1.01189	0.0165677	0.475605	NA
CVD	Overall	5	WDR70	protein_coding	non-coding intronic,intronic	37670324	rs529647795	AG	A	AG	381994	1.00402	0.00565662	0.477872	NA
CVD	noDM	5	WDR70	protein_coding	non-coding intronic,intronic	37670324	rs529647795	AG	A	AG	345245	1.00489	0.00597577	0.414072	NA
CVD	DM	5	WDR70	protein_coding	non-coding intronic,intronic	37670324	rs529647795	AG	A	AG	36749	0.996772	0.0175776	0.854052	NA
CVD	Overall	5	NNT	protein_coding	intronic	43614589	rs62367623	G	A	G	381994	1.0005	0.0111705	0.964367	NA
CVD	noDM	5	NNT	protein_coding	intronic	43614589	rs62367623	G	A	G	345245	0.996732	0.011812	0.781658	NA
CVD	DM	5	NNT	protein_coding	intronic	43614589	rs62367623	G	A	G	36749	1.03166	0.0346667	0.36859	NA
CVD	Overall	5	NNT	protein_coding	intronic	43665323	rs62367652	A	T	A	381994	1.00167	0.011307	0.882735	NA
CVD	noDM	5	NNT	protein_coding	intronic	43665323	rs62367652	A	T	A	345245	0.99832	0.0119496	0.88807	NA
CVD	DM	5	NNT	protein_coding	intronic	43665323	rs62367652	A	T	A	36749	1.02904	0.0352393	0.416615	NA
CVD	Overall	5	KIF2A	protein_coding	non-coding intronic	61685944	rs3822487	G	A	G	381994	1.02042	0.00961401	0.0355171	NA
CVD	Overall	5	DIMT1	protein_coding	3downstream,non-coding intronic,intronic	61685944	rs3822487	G	A	G	381994	1.02042	0.00961401	0.0355171	NA
CVD	noDM	5	KIF2A	protein_coding	non-coding intronic	61685944	rs3822487	G	A	G	345245	1.02767	0.0101368	0.00709639	NA
CVD	noDM	5	DIMT1	protein_coding	3downstream,non-coding intronic,intronic	61685944	rs3822487	G	A	G	345245	1.02767	0.0101368	0.00709639	NA
CVD	DM	5	KIF2A	protein_coding	non-coding intronic	61685944	rs3822487	G	A	G	36749	0.959487	0.0300786	0.169152	NA
CVD	DM	5	DIMT1	protein_coding	3downstream,non-coding intronic,intronic	61685944	rs3822487	G	A	G	36749	0.959487	0.0300786	0.169152	NA
CVD	Overall	5	CDK7	protein_coding	coding nonsyn,3downstream,3utr	68568858	rs34584424	T	C	T	381994	1.09191	0.0161444	5.13482e-08	rs78643014(1),rs139910473(1)
CVD	noDM	5	CDK7	protein_coding	coding nonsyn,3downstream,3utr	68568858	rs34584424	T	C	T	345245	1.08282	0.0170285	2.96987e-06	NA
CVD	DM	5	CDK7	protein_coding	coding nonsyn,3downstream,3utr	68568858	rs34584424	T	C	T	36749	1.17864	0.0516579	0.00146381	NA
CVD	Overall	5	MRPS27	protein_coding	non-coding intronic,intronic	71544539	rs750838224	T	TTAAA	TTAAA	381994	1.00269	0.00516676	0.603645	NA
CVD	noDM	5	MRPS27	protein_coding	non-coding intronic,intronic	71544539	rs750838224	T	TTAAA	TTAAA	345245	1.00587	0.00545349	0.283278	NA
CVD	DM	5	MRPS27	protein_coding	non-coding intronic,intronic	71544539	rs750838224	T	TTAAA	TTAAA	36749	0.975214	0.0161683	0.120594	NA
CVD	Overall	5	COL4A3BP	protein_coding	3downstream,non-coding,intronic	74665860	rs3733907	C	G	C	381994	1.012	0.00705617	0.0909226	NA
CVD	noDM	5	COL4A3BP	protein_coding	3downstream,non-coding,intronic	74665860	rs3733907	C	G	C	345245	1.01073	0.0074489	0.151981	NA
CVD	DM	5	COL4A3BP	protein_coding	3downstream,non-coding,intronic	74665860	rs3733907	C	G	C	36749	1.02533	0.0221087	0.257808	NA
CVD	Overall	5	COL4A3BP	protein_coding	intronic,3utr,non-coding intronic	74674975	rs10462517	C	T	C	381994	0.995449	0.00615493	0.458677	NA
CVD	noDM	5	COL4A3BP	protein_coding	intronic,3utr,non-coding intronic	74674975	rs10462517	C	T	C	345245	0.997702	0.00649562	0.723167	NA
CVD	DM	5	COL4A3BP	protein_coding	intronic,3utr,non-coding intronic	74674975	rs10462517	C	T	C	36749	0.976495	0.0192581	0.216795	NA
CVD	Overall	5	COL4A3BP	protein_coding	intronic	74693438	rs141549057	T	G	T	381994	0.965936	0.0240613	0.149758	NA
CVD	noDM	5	COL4A3BP	protein_coding	intronic	74693438	rs141549057	T	G	T	345245	0.972447	0.0254415	0.272119	NA
CVD	DM	5	COL4A3BP	protein_coding	intronic	74693438	rs141549057	T	G	T	36749	0.912313	0.0734485	0.211493	NA
CVD	Overall	5	COL4A3BP	protein_coding	intronic	74700126	rs185707939	C	A	C	381994	1.00133	0.0219537	0.951673	NA
CVD	noDM	5	COL4A3BP	protein_coding	intronic	74700126	rs185707939	C	A	C	345245	0.998448	0.0232082	0.946641	NA
CVD	DM	5	COL4A3BP	protein_coding	intronic	74700126	rs185707939	C	A	C	36749	1.02548	0.0681824	0.712142	NA
CVD	Overall	5	COL4A3BP	protein_coding	intronic	74713742	rs182142147	A	G	A	381994	1.01366	0.0233642	0.561511	NA
CVD	noDM	5	COL4A3BP	protein_coding	intronic	74713742	rs182142147	A	G	A	345245	1.01121	0.0246105	0.650615	NA
CVD	DM	5	COL4A3BP	protein_coding	intronic	74713742	rs182142147	A	G	A	36749	1.03702	0.0748003	0.627003	NA
CVD	Overall	5	COL4A3BP	protein_coding	intronic	74717761	rs80324692	T	C	T	381994	0.999193	0.00927704	0.930667	NA
CVD	noDM	5	COL4A3BP	protein_coding	intronic	74717761	rs80324692	T	C	T	345245	0.997788	0.00980827	0.821342	NA
CVD	DM	5	COL4A3BP	protein_coding	intronic	74717761	rs80324692	T	C	T	36749	1.01153	0.0287233	0.689929	NA
CVD	Overall	5	COL4A3BP	protein_coding	intronic	74728175	rs75580049	A	G	A	381994	1.02407	0.0120474	0.0483551	NA
CVD	noDM	5	COL4A3BP	protein_coding	intronic	74728175	rs75580049	A	G	A	345245	1.02058	0.0127086	0.108897	NA
CVD	DM	5	COL4A3BP	protein_coding	intronic	74728175	rs75580049	A	G	A	36749	1.05435	0.0381557	0.165414	NA
CVD	Overall	5	COL4A3BP	protein_coding	intronic	74778480	rs80220036	C	T	C	381994	1.00791	0.0120183	0.511923	NA
CVD	noDM	5	COL4A3BP	protein_coding	intronic	74778480	rs80220036	C	T	C	345245	1.0145	0.0126792	0.256086	NA
CVD	DM	5	COL4A3BP	protein_coding	intronic	74778480	rs80220036	C	T	C	36749	0.95133	0.0374413	0.182666	NA
CVD	Overall	5	COL4A3BP	protein_coding	intronic	74782411	rs72768359	G	T	G	381994	0.997338	0.00768507	0.728715	NA
CVD	noDM	5	COL4A3BP	protein_coding	intronic	74782411	rs72768359	G	T	G	345245	0.996013	0.00812801	0.623081	NA
CVD	DM	5	COL4A3BP	protein_coding	intronic	74782411	rs72768359	G	T	G	36749	1.00801	0.0237216	0.736629	NA
CVD	Overall	5	COL4A3BP	protein_coding	intronic	74791319	rs146491289	A	G	A	381994	0.980387	0.0216277	0.359754	NA
CVD	noDM	5	COL4A3BP	protein_coding	intronic	74791319	rs146491289	A	G	A	345245	0.983701	0.0227852	0.470766	NA
CVD	DM	5	COL4A3BP	protein_coding	intronic	74791319	rs146491289	A	G	A	36749	0.950464	0.0685174	0.458392	NA
CVD	Overall	5	COL4A3BP	protein_coding	intronic	74806104	rs5744533	T	C	T	381994	0.995837	0.00615883	0.498157	NA
CVD	noDM	5	COL4A3BP	protein_coding	intronic	74806104	rs5744533	T	C	T	345245	0.998187	0.00649969	0.780151	NA
CVD	DM	5	COL4A3BP	protein_coding	intronic	74806104	rs5744533	T	C	T	36749	0.976052	0.0192696	0.208422	NA
CVD	Overall	5	DMGDH	protein_coding	non-coding intronic	78416416	rs567754	T	C	T	381994	0.996497	0.00531333	0.508927	NA
CVD	Overall	5	BHMT	protein_coding	5upstream,non-coding intronic,intronic,3downstream	78416416	rs567754	T	C	T	381994	0.996497	0.00531333	0.508927	NA
CVD	noDM	5	DMGDH	protein_coding	non-coding intronic	78416416	rs567754	T	C	T	345245	0.998073	0.0056059	0.730812	NA
CVD	noDM	5	BHMT	protein_coding	5upstream,non-coding intronic,intronic,3downstream	78416416	rs567754	T	C	T	345245	0.998073	0.0056059	0.730812	NA
CVD	DM	5	DMGDH	protein_coding	non-coding intronic	78416416	rs567754	T	C	T	36749	0.982621	0.0166902	0.293519	NA
CVD	DM	5	BHMT	protein_coding	5upstream,non-coding intronic,intronic,3downstream	78416416	rs567754	T	C	T	36749	0.982621	0.0166902	0.293519	NA
CVD	Overall	5	BHMT	protein_coding	3downstream,non-coding intronic,intronic	78422570	rs10037045	T	A	T	381994	0.994775	0.00551202	0.341921	NA
CVD	Overall	5	DMGDH	protein_coding	non-coding intronic	78422570	rs10037045	T	A	T	381994	0.994775	0.00551202	0.341921	NA
CVD	noDM	5	BHMT	protein_coding	3downstream,non-coding intronic,intronic	78422570	rs10037045	T	A	T	345245	0.996416	0.00581855	0.537152	NA
CVD	noDM	5	DMGDH	protein_coding	non-coding intronic	78422570	rs10037045	T	A	T	345245	0.996416	0.00581855	0.537152	NA
CVD	DM	5	BHMT	protein_coding	3downstream,non-coding intronic,intronic	78422570	rs10037045	T	A	T	36749	0.980784	0.0172292	0.260086	NA
CVD	DM	5	DMGDH	protein_coding	non-coding intronic	78422570	rs10037045	T	A	T	36749	0.980784	0.0172292	0.260086	NA
CVD	Overall	5	DMGDH	protein_coding	non-coding intronic	78531337	rs1316753	C	G	C	381994	0.997964	0.00513289	0.691262	NA
CVD	noDM	5	DMGDH	protein_coding	non-coding intronic	78531337	rs1316753	C	G	C	345245	1.00168	0.00541734	0.757358	NA
CVD	DM	5	DMGDH	protein_coding	non-coding intronic	78531337	rs1316753	C	G	C	36749	0.96654	0.016073	0.0342298	NA
CVD	Overall	5	CTD-2260A17.2	protein_coding	non-coding intronic	96223880	rs4869313	G	T	T	381994	1.01619	0.00505526	0.00149031	NA
CVD	Overall	5	ERAP2	protein_coding	intronic,5upstream	96223880	rs4869313	G	T	T	381994	1.01619	0.00505526	0.00149031	NA
CVD	noDM	5	CTD-2260A17.2	protein_coding	non-coding intronic	96223880	rs4869313	G	T	T	345245	1.01647	0.00533611	0.00220406	NA
CVD	noDM	5	ERAP2	protein_coding	intronic,5upstream	96223880	rs4869313	G	T	T	345245	1.01647	0.00533611	0.00220406	NA
CVD	DM	5	CTD-2260A17.2	protein_coding	non-coding intronic	96223880	rs4869313	G	T	T	36749	1.01347	0.0158295	0.398084	NA
CVD	DM	5	ERAP2	protein_coding	intronic,5upstream	96223880	rs4869313	G	T	T	36749	1.01347	0.0158295	0.398084	NA
CVD	Overall	5	ERAP2	protein_coding	3downstream,intronic	96252589	rs2910686	C	T	C	381994	1.01695	0.00505133	0.000877585	NA
CVD	Overall	5	CTD-2260A17.2	protein_coding	non-coding intronic	96252589	rs2910686	C	T	C	381994	1.01695	0.00505133	0.000877585	NA
CVD	noDM	5	ERAP2	protein_coding	3downstream,intronic	96252589	rs2910686	C	T	C	345245	1.01689	0.00533174	0.0016798	NA
CVD	noDM	5	CTD-2260A17.2	protein_coding	non-coding intronic	96252589	rs2910686	C	T	C	345245	1.01689	0.00533174	0.0016798	NA
CVD	DM	5	ERAP2	protein_coding	3downstream,intronic	96252589	rs2910686	C	T	C	36749	1.01682	0.0158234	0.291726	NA
CVD	DM	5	CTD-2260A17.2	protein_coding	non-coding intronic	96252589	rs2910686	C	T	C	36749	1.01682	0.0158234	0.291726	NA
CVD	Overall	5	LNPEP	protein_coding	intronic	96302572	rs114110091	T	C	T	381994	1.03234	0.0104667	0.0023605	NA
CVD	noDM	5	LNPEP	protein_coding	intronic	96302572	rs114110091	T	C	T	345245	1.02631	0.0110479	0.0187299	NA
CVD	DM	5	LNPEP	protein_coding	intronic	96302572	rs114110091	T	C	T	36749	1.08711	0.0331019	0.0116287	NA
CVD	Overall	5	LNPEP	protein_coding	intronic	96344592	rs112824186	A	G	A	381994	0.986511	0.0157739	0.38925	NA
CVD	noDM	5	LNPEP	protein_coding	intronic	96344592	rs112824186	A	G	A	345245	0.980524	0.0166736	0.23817	NA
CVD	DM	5	LNPEP	protein_coding	intronic	96344592	rs112824186	A	G	A	36749	1.03936	0.0492752	0.433304	NA
CVD	Overall	5	HSD17B4	protein_coding	non-coding intronic,intronic	118789338	rs6897978	G	A	G	381994	0.983615	0.00626168	0.00832846	NA
CVD	noDM	5	HSD17B4	protein_coding	non-coding intronic,intronic	118789338	rs6897978	G	A	G	345245	0.98441	0.00660842	0.0174209	NA
CVD	DM	5	HSD17B4	protein_coding	non-coding intronic,intronic	118789338	rs6897978	G	A	G	36749	0.974918	0.0196266	0.195579	NA
CVD	Overall	5	HSD17B4	protein_coding	non-coding intronic,intronic	118798793	rs2451814	A	C	A	381994	1.00261	0.00536135	0.626958	NA
CVD	noDM	5	HSD17B4	protein_coding	non-coding intronic,intronic	118798793	rs2451814	A	C	A	345245	0.999856	0.00566132	0.979757	NA
CVD	DM	5	HSD17B4	protein_coding	non-coding intronic,intronic	118798793	rs2451814	A	C	A	36749	1.02716	0.0167619	0.109824	NA
CVD	Overall	5	ACSL6	protein_coding	intronic,non-coding	131320462	rs253942	T	C	T	381994	1.0039	0.0108217	0.719157	NA
CVD	noDM	5	ACSL6	protein_coding	intronic,non-coding	131320462	rs253942	T	C	T	345245	1.00486	0.011427	0.671566	NA
CVD	DM	5	ACSL6	protein_coding	intronic,non-coding	131320462	rs253942	T	C	T	36749	0.997124	0.0337144	0.931919	NA
CVD	Overall	5	SLC22A5	protein_coding	5upstream,intronic	131709911	rs546280079	CA	C	CA	381994	1.01622	0.00662715	0.015218	NA
CVD	noDM	5	SLC22A5	protein_coding	5upstream,intronic	131709911	rs546280079	CA	C	CA	345245	1.01458	0.00700054	0.0386588	NA
CVD	DM	5	SLC22A5	protein_coding	5upstream,intronic	131709911	rs546280079	CA	C	CA	36749	1.03058	0.0206515	0.144674	NA
CVD	Overall	5	ATP6V0E1P1	pseudogene	non-coding	132284251	rs17691584	C	A	C	381994	0.982078	0.00669571	0.00691432	NA
CVD	Overall	5	AFF4	protein_coding	non-coding intronic,intronic	132284251	rs17691584	C	A	C	381994	0.982078	0.00669571	0.00691432	NA
CVD	noDM	5	ATP6V0E1P1	pseudogene	non-coding	132284251	rs17691584	C	A	C	345245	0.979461	0.00707497	0.0033548	NA
CVD	noDM	5	AFF4	protein_coding	non-coding intronic,intronic	132284251	rs17691584	C	A	C	345245	0.979461	0.00707497	0.0033548	NA
CVD	DM	5	ATP6V0E1P1	pseudogene	non-coding	132284251	rs17691584	C	A	C	36749	1.00481	0.0208527	0.81802	NA
CVD	DM	5	AFF4	protein_coding	non-coding intronic,intronic	132284251	rs17691584	C	A	C	36749	1.00481	0.0208527	0.81802	NA
CVD	Overall	5	HARS	protein_coding	3downstream,non-coding intronic,intronic	140061761	rs61093427	T	C	T	381994	1.00244	0.00601991	0.685495	NA
CVD	noDM	5	HARS	protein_coding	3downstream,non-coding intronic,intronic	140061761	rs61093427	T	C	T	345245	1.0032	0.00635223	0.614555	NA
[truncated: 2,986 more rows]

## Sheet: HBP
PHENO	COHORT	CHROM	Overlapped Gene	Type	Annotation	BP	RS	REF	ALT	A1	OBS_CT	OR.or.BETA	SE.or.LOG(OR)_SE	P	SP2
[truncated: 4,173 more rows]

## Sheet: Chol
PHENO	COHORT	CHROM	Overlapped Gene	Type	Annotation	BP	RS	REF	ALT	A1	OBS_CT	OR.or.BETA	SE.or.LOG(OR)_SE	P	SP2
[truncated: 4,173 more rows]

[truncated: 5 more sheets: DBP, HDL, LDL, SBP, TG]
