# Supplementary material for: Mitochondrial related variants associated with cardiovascular traits
Source: Front Physiol. 2024 Aug 27;15:1395371. doi: 10.3389/fphys.2024.1395371 (PMC11385366; doi:10.3389/fphys.2024.1395371)
Supplement: Supplementary file 2 [file Table3.xlsx]

## Sheet: Legends
Supplementary Table	Legend
Supplementary Table 1	Data Fields used to calculate variables in the UK Biobank. Abbreviations: BMI: body mass index. SBP: systolic blood pressure. DBP: diastolic blood pressure.
Supplementary Table 2	Codes from the UK Biobank Data Fields non-cancer illness (20002), operation (20004) and treatment/medication (20003) used for the definitions of cardiovascular disease, hypertension and diabetes. Abbreviations: RAASi: renin-angiotensin-aldosterone system inhibitors. * Full list of medications used in the analyses is available in: Albuminuria-related genetic biomarkers: replication and predictive …
Supplementary Table 3	Influence of traditional non-genomic risk factors for cardiovascular disease on the cardiac phenotypes investigated (coronary artery disease, cardiovascular disease, hypertension) in the overall, non-diabetic and diabetic cohorts of the UK Biobank (Multivariable logistic regression).
Supplementary Table 4	Frequency of the mitochondrial haplogroups in the UK Biobank Cohort.
Supplementary Table 5	Number of genes and gene variants significantly associated in all cohorts. *Number of traits and genes reported in GWAS Catalog, according to the FUMAGWAS analysis.
Supplementary Table 6	Enrichment analysis for significant genes in all cohorts

## Sheet: ST1
Supplementary Table 1	Data Fields used to calculate variables in the UKB. BMI: body mass index. DBP: diastolic blood pressure. SBP: systolic blood pressure.
Variable	Data Field
Age (years)	21003
Blood pressure medication (females)	6153
Blood pressure medication (males)	6177
BMI (kg/m2)	21001
DBP - automatic measure (mmHg)	4079
DBP - manual measure (mmHg)	94
Diabetes diagnosed by a doctor	2443
Fasting time (hours)	74
Glucose in blood (mmol/L)	30740
Glycated haemoglobin (HbA1c) (mmol/mol)	30750
Non-cancer illness	20002
Operations	20004
SBP - automatic measure (mmHg)	4080
SBP - manual measure (mmHg)	93
Sex	22001
Smoking habit	20116
Treatment or medication	20003

## Sheet: ST2
Supplementary Table 2	Codes from the UK Biobank Data Fields non-cancer illness (20002), operation (20004) and treatment/medication (20003) used for the definitions of cardiovascular disease, hypertension and diabetes. Abbreviations: RAASi: renin-angiotensin-aldosterone system inhibitors. * Full list of medications used in the analyses is available in: Albuminuria-related genetic biomarkers: replication and predictive …
Data Field	Hypertension		Diabetes		Cardiovascular Disease
20002	1065	Hypertension	1220	Diabetes	1065	Hypertension
	1072	Essential hypertension	1222	Type 1 diabetes	1066	Heart/cardiac problem
			1223	Type 2 diabetes	1067	Peripheral vascular disease
			1276	Diabetic eye disease	1068	Venous thromboembolic disease
			1468	Diabetic neuropathy or ulcers	1072	Essential hypertension
			1607	Diabetic nephropathy	1073	Gestational hypertension/pre-eclampsia
					1074	Angina
					1075	Heart attack/myocardial infarction
					1076	Heart failure/pulmonary oedema
					1077	Heart arrhythmia
					1078	Heart valve problem/heart murmur
					1079	Cardiomyopathy
					1080	Pericardial problem
					1081	Stroke
					1082	Transient ischaemic attack (TIA)
					1083	Subdural haemorrhage/haematoma
					1086	Subarachnoid haemorrhage
					1087	Leg claudication/ intermittent claudication
					1088	Arterial embolism
					1093	Pulmonary embolism +/- DVT
					1426	Myocarditis
					1471	Atrial fibrillation
					1483	Atrial flutter
					1484	Wolff parkinson white / WPW syndrome
					1485	Irregular heart beat
					1486	Sick sinus syndrome
					1487	Svt / supraventricular tachycardia
					1488	Mitral valve prolapse
					1489	Mitral stenosis
					1490	Aortic stenosis
					1491	Brain haemorrhage
					1492	Aortic aneurysm
					1583	Ischaemic stroke
					1584	Mitral valve disease
					1585	Mitral regurgitation / incompetence
					1586	Aortic valve disease
					1587	Aortic regurgitation / incompetence
					1588	Hypertrophic cardiomyopathy (HCM/HOCM)
					1589	Pericarditis
					1590	Pericardial effusion
					1591	Aortic aneurysm rupture
					1592	Aortic dissection
20004	1110	Renal artery angioplasty stent	1457	Pancreatic transplant	1069	Heart surgery
					1070	Coronary angioplasty (PTCA) stent
					1071	Other arterial surgery/revascularisation procedures
					1095	Coronary artery bypass grafts (CABG)
					1096	Pacemaker/defibrillator insertion
					1097	Heart valve surgery
					1098	Heart transplant
					1099	Aortic valve repair/replacement
					1100	Mitral valve repair/replacement
					1101	Other valve repair/replacement
					1102	Fem-pop bypass/leg artery bypass
					1103	Leg artery aneurysm repair
					1104	Aortic aneurysm/repair or stent
					1105	Carotid artery surgery/endarterectomy
					1106	Cerebral artery aneurysm surgery or clipping
					1107	Non-coronary artery angioplasty stent
					1108	Leg artery angioplasty stent
					1109	Carotid artery angioplasty stent
					1110	Renal artery angioplasty stent
					1514	Coronary angiogram
					1515	Angiogram not coronary
					1516	Echocardiogram/transoesophageal echo
					1523	Triple heart bypass
					1524	Cardioversion
					1545	ECG/electrocardiogram
					1548	Pacemaker insertion
					1549	Pacemaker battery change
					1550	Defibrillator/ICD insertion
					1551	Defibrillator/ICD battery change
					1552	Electrophysiological studies (EPS)
					1553	Cardiac ablation
					1554	Pericardial surgery
					1555	Femoral/popliteal/iliac aneurysm repair
20003	**Four hundred and nine drugs used for management of hypertension, including RAASi		*Forty-two drugs used for management of diabetes		**Five hundred and seven drugs used for management of cardiovascular disease, including RAASi

## Sheet: ST3
Supplementary Table 3	Influence of traditional non-genomic risk factors for cardiovascular disease on the cardiac phenotypes investigated (coronary artery disease, cardiovascular disease, hypertension) in the overall, non-diabetic and diabetic cohorts of the UK Biobank (Multivariable logistic regression).
PHENOTYPE	COHORT	N	VARIABLE	Beta	Standard Error	P-value	Odds Ratio	CI95, Lower Limit	CI95, Upper Limit
Coronary Artery Disease	Overall	330134
			Sex (Female)	-1.12028	0.027634	2e-16	0.326187	0.308932	0.34428
			Age (years)	0.085729	0.001753	2e-16	1.08951	1.08579	1.09327
			Body Mass Index (kg/m2)	0.048401	0.002309	2e-16	1.04959	1.04484	1.05434
			EverSmoker	0.521451	0.022144	2e-16	1.68447	1.61303	1.75932
			Diabetes (yes)	-0.201605	0.028362	1.17e-12	0.817418	0.773083	0.863995
			Diastolic blood pressure (mmHg)	-0.039089	0.00134	2e-16	0.961665	0.959142	0.964193
			Systolic blood pressure (mmHg)	-0.001527	0.000726	0.0354	0.998474	0.997052	0.999893
			Cholesterol (mmol/L)	-0.557495	0.087965	2.33e-10	0.572642	0.481834	0.680212
			HDL cholesterol (mmol/L)	-0.397859	0.091217	1.29e-05	0.671757	0.561805	0.803294
			LDL direct (mmol/L)	-0.526064	0.103263	3.5e-07	0.590927	0.482766	0.723647
			Triglycerides (mmol/L)	0.144374	0.017743	4.05e-16	1.15532	1.11577	1.19613
	Non Diabetic	299046
			Sex (Female)	-1.14057	0.0309653	2e-16	0.319638	0.300747	0.339562
			Age (years)	0.0875633	0.0019393	2e-16	1.09151	1.08739	1.09568
			Body Mass Index (kg/m2)	0.0565775	0.002713	2e-16	1.05821	1.05258	1.06384
			EverSmoker	0.516224	0.0247615	2e-16	1.67569	1.59643	1.75916
			Diastolic blood pressure (mmHg)	-0.0398566	0.0015338	2e-16	0.960927	0.958042	0.963819
			Systolic blood pressure (mmHg)	-0.0009494	0.0008287	0.25191	0.999051	0.997427	1.00067
			Cholesterol (mmol/L)	-0.663977	0.101	4.9e-11	0.5148	0.422239	0.627321
			HDL cholesterol (mmol/L)	-0.309247	0.104068	0.00296	0.734	0.598579	0.900081
			LDL direct (mmol/L)	-0.571719	0.118292	1.34e-06	0.564554	0.447827	0.711996
			Triglycerides (mmol/L)	0.141987	0.0208447	9.65e-12	1.15256	1.10633	1.20053
	Diabetic	31088
			Sex (Female)	-1.04489	0.061505	2e-16	0.35173	0.311471	0.396416
			Age (years)	0.071578	0.004133	2e-16	1.0742	1.0656	1.083
			Body Mass Index (kg/m2)	0.033644	0.004352	1.08e-14	1.03422	1.0254	1.04305
			EverSmoker	0.542299	0.050045	2e-16	1.71996	1.55995	1.89811
			Diastolic blood pressure (mmHg)	-0.041424	0.002797	2e-16	0.959423	0.95417	0.964689
			Systolic blood pressure (mmHg)	-0.002228	0.001511	0.140341	0.997775	0.994817	1.00073
			Cholesterol (mmol/L)	-0.217832	0.182287	0.232088	0.80426	0.561541	1.1471
			HDL cholesterol (mmol/L)	-0.768851	0.195097	8.12e-05	0.463545	0.316484	0.679881
			LDL direct (mmol/L)	-0.209711	0.216117	0.331869	0.810819	0.532022	1.2409
			Triglycerides (mmol/L)	0.120855	0.034194	0.000409	1.12846	1.05516	1.20651
Cardiovascular Disease	Overall	330147
CVD	Overall		Sex (Female)	-0.0137109	0.0091565	0.13429	0.986383	0.968841	1.00425
			Age (years)	0.0646232	0.0005916	2e-16	1.06676	1.06552	1.068
CVD	Overall		Body Mass Index (kg/m2)	0.0836535	0.0009738	2e-16	1.08725	1.08518	1.08933
CVD	Overall		EverSmoker	0.12378	0.0082605	2e-16	1.13177	1.11359	1.15024
CVD	Overall		Diabetes (yes)	0.495961	0.0139697	2e-16	1.64208	1.59773	1.68766
CVD	Overall		Diastolic blood pressure (mmHg)	0.0153619	0.0005348	2e-16	1.01548	1.01442	1.01655
CVD	Overall		Systolic blood pressure (mmHg)	0.0168908	0.0002946	2e-16	1.01703	1.01645	1.01762
CVD	Overall		Cholesterol (mmol/L)	-0.404623	0.0301806	2e-16	0.667228	0.628897	0.70788
CVD	Overall		HDL cholesterol (mmol/L)	0.10404	0.0318247	0.00108	1.10964	1.04255	1.18107
CVD	Overall		LDL direct (mmol/L)	-0.106834	0.0353755	0.00253	0.898675	0.838477	0.963198
CVD	Overall		Triglycerides (mmol/L)	0.180184	0.0072968	2e-16	1.19744	1.18044	1.21469
CVD	Non Diabetic	299059
CVD	noDM		Sex (Female)	-5.39e-06	0.009623	1	0.999995	0.981314	1.01904
			Age (years)	0.06435	0.0006205	2e-16	1.06647	1.06517	1.06777
CVD	noDM		Body Mass Index (kg/m2)	0.07983	0.001036	2e-16	1.0831	1.08091	1.0853
CVD	noDM		EverSmoker	0.123	0.008671	2e-16	1.13084	1.11179	1.15022
CVD	noDM		Diastolic blood pressure (mmHg)	0.01754	0.0005639	2e-16	1.0177	1.01657	1.01882
CVD	noDM		Systolic blood pressure (mmHg)	0.01655	0.0003097	2e-16	1.01669	1.01607	1.0173
CVD	noDM		Cholesterol (mmol/L)	-0.3475	0.03167	2e-16	0.706464	0.663938	0.751698
CVD	noDM		HDL cholesterol (mmol/L)	0.05319	0.03342	0.111	1.05463	0.987768	1.12603
CVD	noDM		LDL direct (mmol/L)	-0.1531	0.03709	3.66e-05	0.858036	0.797875	0.922733
CVD	noDM		Triglycerides (mmol/L)	0.1604	0.00774	2e-16	1.17402	1.15635	1.19197
CVD	Diabetic
CVD	DM	310888	Sex (Female)	-0.151875	0.0300737	4.42e-07	0.859096	0.809938	0.911278
			Age (years)	0.0646899	0.0019853	2e-16	1.06683	1.06269	1.071
CVD	DM		Body Mass Index (kg/m2)	0.107705	0.0029758	2e-16	1.11372	1.10727	1.12026
CVD	DM		EverSmoker	0.116015	0.0274171	2.32e-05	1.12301	1.06424	1.18499
CVD	DM		Diastolic blood pressure (mmHg)	-0.0028819	0.0017251	0.0948	0.997122	0.993755	1.0005
CVD	DM		Systolic blood pressure (mmHg)	0.0189477	0.0009678	2e-16	1.01913	1.0172	1.02107
CVD	DM		Cholesterol (mmol/L)	-0.811615	0.102219	2.02e-15	0.44414	0.36329	0.542374
CVD	DM		HDL cholesterol (mmol/L)	0.465266	0.106858	1.34e-05	1.59244	1.29203	1.96429
CVD	DM		LDL direct (mmol/L)	0.251078	0.120454	0.0371	1.28541	1.01561	1.62862
CVD	DM		Triglycerides (mmol/L)	0.319442	0.0228836	2e-16	1.37636	1.31616	1.43969
Hypertension	Overall	330410
Hypertension	Overall		Sex (Female)	-0.187065	0.009123	2e-16	0.82939	0.814692	0.844354
			Age (years)	0.0768139	0.0005688	2e-16	1.07984	1.07864	1.08105
Hypertension	Overall		Body Mass Index (kg/m2)	0.108111	0.0009566	2e-16	1.11417	1.11209	1.11626
Hypertension	Overall		EverSmoker	0.0806633	0.008338	2e-16	1.08401	1.06643	1.10186
Hypertension	Overall		Diabetes (yes)	0.493733	0.0138011	2e-16	1.63842	1.59469	1.68334
Hypertension	Overall		Cholesterol (mmol/L)	-0.378208	0.0304352	2e-16	0.685088	0.645406	0.727188
Hypertension	Overall		HDL cholesterol (mmol/L)	0.244884	0.0321137	2.43e-14	1.27747	1.19955	1.36047
Hypertension	Overall		LDL direct (mmol/L)	-0.0641794	0.0356859	0.0721	0.937837	0.874487	1.00579
Hypertension	Overall		Triglycerides (mmol/L)	0.220638	0.0073289	2e-16	1.24687	1.22909	1.26492
Hypertension	Non Diabetic	299285
Hypertension	noDM		Sex (Female)	-0.178799	0.0096086	2e-16	0.836274	0.820673	0.852173
			Age (years)	0.0767868	0.0005983	2e-16	1.07981	1.07855	1.08108
Hypertension	noDM		Body Mass Index (kg/m2)	0.106225	0.0010177	2e-16	1.11207	1.10986	1.11429
Hypertension	noDM		EverSmoker	0.0793573	0.0087707	2e-16	1.08259	1.06414	1.10136
Hypertension	noDM		Cholesterol (mmol/L)	-0.323987	0.0319688	2e-16	0.72326	0.679324	0.770019
Hypertension	noDM		HDL cholesterol (mmol/L)	0.203204	0.0337593	1.75e-09	1.22532	1.14687	1.30914
Hypertension	noDM		LDL direct (mmol/L)	-0.103043	0.0374496	0.00593	0.902088	0.838248	0.970795
Hypertension	noDM		Triglycerides (mmol/L)	0.203907	0.0077849	2e-16	1.22618	1.20762	1.24504
Hypertension	Diabetic	31125
Hypertension	DM		Sex (Female)	-0.272049	0.029267	2e-16	0.761817	0.71935	0.806801
			Age (years)	0.074778	0.001859	2e-16	1.07764	1.07373	1.08159
Hypertension	DM		Body Mass Index (kg/m2)	0.11775	0.002864	2e-16	1.12496	1.11869	1.13132
Hypertension	DM		EverSmoker	0.078953	0.027045	0.00351	1.08215	1.02626	1.14104
Hypertension	DM		Cholesterol (mmol/L)	-0.757151	0.101621	9.28e-14	0.469001	0.384103	0.572076
Hypertension	DM		HDL cholesterol (mmol/L)	0.532862	0.106161	5.18e-07	1.7038	1.38426	2.09871
Hypertension	DM		LDL direct (mmol/L)	0.208259	0.119791	0.08212	1.23153	0.974275	1.5582
Hypertension	DM		Triglycerides (mmol/L)	0.336311	0.02252	2e-16	1.39977	1.3395	1.46312

## Sheet: ST4
Supplementary Table 4	Frequency of the mitochondrial haplogroups in the UK Biobank Cohort.
	Overall Cohort		Non-Diabetic Cohort		Diabetic Cohort
Haplogroup	N	%	N	%	N	%
H	167637	43.9	151526	43.9	16111	43.8
U	51107	13.4	46157	13.4	4950	13.5
J	42218	11.1	38106	11	4112	11.2
T	37591	9.8	33979	9.8	3612	9.8
K	31703	8.3	28718	8.3	2985	8.1
Other	14329	3.8	12970	3.8	1359	3.7
I	12345	3.2	11146	3.2	1199	3.3
V	10532	2.8	9464	2.7	1068	2.9
W	7585	2	6837	2	748	2
X	5553	1.5	5066	1.5	487	1.3
N	915	0.2	842	0.2	73	0.2
HV	472	0.1	429	0.1	43	0.1
Z	7	0	5	0	2	0
Total	381994	100	345245	100	36749	100

## Sheet: ST5
Supplementary Table 5	Number of genes and gene variants significantly associated in all cohorts. *Number of traits and genes reported in GWAS Catalog, according to the FUMAGWAS analysis.
	Genes	Gene Variants	Traits/Genes reported in GWAS Catalog*
Cholesterol	5	12	4/4
Diastolic Blood Pressure	4	5	0
High-Density Lipoproteins	11	16	53/9
Low-Density Lipoproteins	8	8	8/5
Triglycerides	18	25	13/16
All	35	66	75/30

## Sheet: ST6
Supplementary Table 6	Enrichment analysis for significant genes in all cohorts
Phenotype	Source	GeneSet	N	n	P-value	adjusted P	genes
Triglycerides	Positional gene sets (MsigDB c1)	chr6p21	325	4	8.28e-05	0.0249	FLOT1, VARS2, ATP6V1G2, FKBPL
Triglycerides	GO cellular components (MsigDB c5)	GOCC_MITOCHONDRION	1598	9	6.34e-07	0.00064	GCKR, GPN1, MAPK10, TRIM31, VARS2, FZD9, MSRA, PINX1, TOMM40
Triglycerides	GWAS catalog reported genes	Autism spectrum disorder or schizophrenia	537	6	1.68e-06	0.00687	TRIM31, TRIM39, TRIM39-RPP21, FLOT1, VARS2, ATP6V1G2, FKBPL
Triglycerides	GWAS catalog reported genes	Body mass index and LDL-C (pairwise)	4	2	3.11e-06	0.00687	GCKR, TOMM40
Triglycerides	GWAS catalog reported genes	Body mass index and triglycerides (pairwise)	9	2	1.86e-05	0.0179	GCKR, TOMM40
Triglycerides	GWAS catalog reported genes	Protein C levels	10	2	2.32e-05	0.0179	GCKR, FZD9
Triglycerides	GWAS catalog reported genes	Cutaneous lupus erythematosus	10	2	2.32e-05	0.0179	TRIM39, TRIM39-RPP21, FLOT1
Triglycerides	GWAS catalog reported genes	Bipolar disorder	511	5	2.75e-05	0.0179	GPN1, MSRA, FADS1, MIR1908, SLC4A1, YJEFN3
Triglycerides	GWAS catalog reported genes	Fasting blood glucose adjusted for BMI	11	2	2.84e-05	0.0179	GCKR, GPN1
Triglycerides	GWAS catalog reported genes	Cardiovascular disease risk factors	18	2	7.87e-05	0.0414	GCKR, TOMM40
Triglycerides	GWAS catalog reported genes	Serum metabolite levels	333	4	9.1e-05	0.0414	GCKR, MSRA, FADS1, MIR1908, TOMM40
Triglycerides	GWAS catalog reported genes	Nonalcoholic fatty liver disease	21	2	0.000108	0.0414	GCKR, GPN1
Triglycerides	GWAS catalog reported genes	Lipid traits	22	2	0.000119	0.0414	GCKR, TOMM40
Triglycerides	GWAS catalog reported genes	C-reactive protein	22	2	0.000119	0.0414	GCKR, TOMM40
Triglycerides	GWAS catalog reported genes	Ulcerative colitis	359	4	0.000122	0.0414	FLOT1, VARS2, ATP6V1G2, FKBPL
Low-Density Lipoproteins	Curated_gene_sets	ROVERSI_GLIOMA_COPY_NUMBER_UP	97	3	3.4e-06	0.0221	CEACAM19, TOMM40, ERCC1
Low-Density Lipoproteins	Chemical and Genetic pertubation gene sets (MsigDB c2)	ROVERSI_GLIOMA_COPY_NUMBER_UP	97	3	3.4e-06	0.0116	CEACAM19, TOMM40, ERCC1
Low-Density Lipoproteins	GWAS catalog reported genes	Alzheimer's disease or HDL levels (pleiotropy)	51	3	4.84e-07	0.00126	CEACAM19, TOMM40, ERCC1
Low-Density Lipoproteins	GWAS catalog reported genes	Body mass index and LDL-C (pairwise)	4	2	5.69e-07	0.00126	GCKR, TOMM40
Low-Density Lipoproteins	GWAS catalog reported genes	Body mass index and triglycerides (pairwise)	9	2	3.41e-06	0.00425	GCKR, TOMM40
Low-Density Lipoproteins	GWAS catalog reported genes	Cholesterol	101	3	3.84e-06	0.00425	GCKR, KANK2, TOMM40
Low-Density Lipoproteins	GWAS catalog reported genes	Cardiovascular disease risk factors	18	2	1.45e-05	0.0128	GCKR, TOMM40
Low-Density Lipoproteins	GWAS catalog reported genes	Lipid traits	22	2	2.18e-05	0.0138	GCKR, TOMM40
Low-Density Lipoproteins	GWAS catalog reported genes	C-reactive protein	22	2	2.18e-05	0.0138	GCKR, TOMM40
Low-Density Lipoproteins	GWAS catalog reported genes	Body mass index x age interaction	32	2	4.68e-05	0.0259	TOMM40, ERCC1
High-Density Lipoproteins	Curated_gene_sets	WAKABAYASHI_ADIPOGENESIS_PPARG_RXRA_BOUND_8D	830	5	1e-05	0.0385	SLC39A13, MTCH2, FADS2, TOMM40, PLA2G6
High-Density Lipoproteins	Curated_gene_sets	WP_OMEGA3_OMEGA6_FATTY_ACID_SYNTHESIS	14	2	1.38e-05	0.0385	FADS2, PLA2G6
High-Density Lipoproteins	Curated_gene_sets	KEGG_ALPHA_LINOLENIC_ACID_METABOLISM	18	2	2.32e-05	0.0385	FADS2, PLA2G6
High-Density Lipoproteins	Curated_gene_sets	WAKABAYASHI_ADIPOGENESIS_PPARG_RXRA_BOUND_WITH_H4K20ME1_MARK	144	3	2.37e-05	0.0385	MTCH2, FADS2, PLA2G6
High-Density Lipoproteins	Chemical and Genetic pertubation gene sets (MsigDB c2)	WAKABAYASHI_ADIPOGENESIS_PPARG_RXRA_BOUND_8D	830	5	1e-05	0.0341	SLC39A13, MTCH2, FADS2, TOMM40, PLA2G6
High-Density Lipoproteins	Chemical and Genetic pertubation gene sets (MsigDB c2)	WAKABAYASHI_ADIPOGENESIS_PPARG_RXRA_BOUND_WITH_H4K20ME1_MARK	144	3	2.37e-05	0.0404	MTCH2, FADS2, PLA2G6
High-Density Lipoproteins	All Canonical Pathways (MsigDB c2)	WP_OMEGA3_OMEGA6_FATTY_ACID_SYNTHESIS	14	2	1.38e-05	0.0359	FADS2, PLA2G6
High-Density Lipoproteins	All Canonical Pathways (MsigDB c2)	KEGG_ALPHA_LINOLENIC_ACID_METABOLISM	18	2	2.32e-05	0.0359	FADS2, PLA2G6
High-Density Lipoproteins	KEGG (MsigDB c2)	KEGG_ALPHA_LINOLENIC_ACID_METABOLISM	18	2	2.32e-05	0.00432	FADS2, PLA2G6
High-Density Lipoproteins	KEGG (MsigDB c2)	KEGG_GLYCEROPHOSPHOLIPID_METABOLISM	75	2	0.000416	0.0387	PGS1, PLA2G6
High-Density Lipoproteins	GO biological processes (MsigDB c5)	GOBP_CHEMICAL_HOMEOSTASIS	991	6	8.26e-07	0.0064	SLC39A8, SLC39A13, MTCH2, SLC12A4, HNF4A, PLA2G6
High-Density Lipoproteins	GO biological processes (MsigDB c5)	GOBP_CARDIOLIPIN_BIOSYNTHETIC_PROCESS	8	2	4.26e-06	0.0165	PGS1, PLA2G6
High-Density Lipoproteins	GO biological processes (MsigDB c5)	GOBP_PHOSPHATIDYLGLYCEROL_BIOSYNTHETIC_PROCESS	10	2	6.85e-06	0.0177	PGS1, PLA2G6
High-Density Lipoproteins	GO biological processes (MsigDB c5)	GOBP_HOMEOSTATIC_PROCESS	1637	6	1.53e-05	0.0283	SLC39A8, SLC39A13, MTCH2, SLC12A4, HNF4A, PLA2G6
High-Density Lipoproteins	GO biological processes (MsigDB c5)	GOBP_CARDIOLIPIN_METABOLIC_PROCESS	16	2	1.82e-05	0.0283	PGS1, PLA2G6
High-Density Lipoproteins	WikiPathways	WP_OMEGA3_OMEGA6_FATTY_ACID_SYNTHESIS	14	2	1.38e-05	0.0101	FADS2, PLA2G6
High-Density Lipoproteins	WikiPathways	WP_ZINC_HOMEOSTASIS	37	2	0.000101	0.0369	SLC39A8, SLC39A13
High-Density Lipoproteins	GWAS catalog reported genes	Metabolic syndrome	111	5	4.49e-10	1.99e-06	SLC39A8, FADS2, PGS1, TOMM40, HNF4A
High-Density Lipoproteins	GWAS catalog reported genes	HDL cholesterol	197	5	8.11e-09	1.79e-05	SLC39A8, FADS2, PGS1, TOMM40, HNF4A
High-Density Lipoproteins	GWAS catalog reported genes	LDL cholesterol levels	220	5	1.41e-08	2.08e-05	SLC39A8, FADS2, PGS1, TOMM40, HNF4A
High-Density Lipoproteins	GWAS catalog reported genes	HDL cholesterol levels in current drinkers	97	4	4.92e-08	5.44e-05	SLC39A8, FADS2, PGS1, HNF4A
High-Density Lipoproteins	GWAS catalog reported genes	HDL cholesterol levels x alcohol consumption (regular vs non-regular drinkers) interaction (2df)	109	4	7.87e-08	6.96e-05	SLC39A8, FADS2, PGS1, HNF4A
High-Density Lipoproteins	GWAS catalog reported genes	HDL cholesterol levels x alcohol consumption (drinkers vs non-drinkers) interaction (2df)	114	4	9.44e-08	6.96e-05	SLC39A8, FADS2, PGS1, HNF4A
High-Density Lipoproteins	GWAS catalog reported genes	Apolipoprotein A1 levels	367	5	1.81e-07	0.000114	SLC39A8, FADS2, PGS1, HNF4A, PLA2G6
High-Density Lipoproteins	GWAS catalog reported genes	Refractive error	1399	7	2.12e-07	0.000117	SLC39A8, SLC39A13, MTCH2, FADS2, SLC12A4, TOMM40, PLA2G6
High-Density Lipoproteins	GWAS catalog reported genes	Triglycerides	153	4	3.08e-07	0.000151	FADS2, PGS1, TOMM40, PLA2G6
High-Density Lipoproteins	GWAS catalog reported genes	High density lipoprotein cholesterol levels	162	4	3.87e-07	0.000171	SLC39A8, FADS2, PGS1, HNF4A
High-Density Lipoproteins	GWAS catalog reported genes	Total cholesterol levels	192	4	7.64e-07	0.000297	SLC39A8, FADS2, PGS1, HNF4A
High-Density Lipoproteins	GWAS catalog reported genes	BMI in non-smokers	47	3	8.06e-07	0.000297	SLC39A8, MTCH2, TOMM40
High-Density Lipoproteins	GWAS catalog reported genes	HDL cholesterol levels	518	5	9.95e-07	0.000339	SLC39A8, FADS2, PGS1, HNF4A, PLA2G6
High-Density Lipoproteins	GWAS catalog reported genes	Low density lipoprotein cholesterol levels	234	4	1.68e-06	0.000526	SLC39A8, FADS2, PGS1, HNF4A
High-Density Lipoproteins	GWAS catalog reported genes	Serum metabolite levels (CMS)	61	3	1.78e-06	0.000526	MTCH2, FADS2, TOMM40
High-Density Lipoproteins	GWAS catalog reported genes	BMI (adjusted for smoking behaviour)	64	3	2.06e-06	0.000563	SLC39A8, MTCH2, TOMM40
High-Density Lipoproteins	GWAS catalog reported genes	Body mass index (joint analysis main effects and smoking interaction)	65	3	2.16e-06	0.000563	SLC39A8, MTCH2, TOMM40
High-Density Lipoproteins	GWAS catalog reported genes	LDL cholesterol levels x alcohol consumption (drinkers vs non-drinkers) interaction (2df)	86	3	5.04e-06	0.00124	FADS2, PGS1, HNF4A
High-Density Lipoproteins	GWAS catalog reported genes	Cholesterol	101	3	8.18e-06	0.00191	FADS2, TOMM40, HNF4A
High-Density Lipoproteins	GWAS catalog reported genes	Fruit consumption	112	3	1.12e-05	0.00247	SLC39A13, MTCH2, TOMM40
High-Density Lipoproteins	GWAS catalog reported genes	LDL cholesterol	149	3	2.63e-05	0.00553	FADS2, PGS1, TOMM40
High-Density Lipoproteins	GWAS catalog reported genes	C-reactive protein levels or LDL-cholesterol levels (pleiotropy)	20	2	2.88e-05	0.0058	FADS2, HNF4A
High-Density Lipoproteins	GWAS catalog reported genes	Brain morphology (MOSTest)	1049	5	3.12e-05	0.00588	SLC39A8, SLC39A13, MTCH2, FADS2, PLA2G6
High-Density Lipoproteins	GWAS catalog reported genes	Problematic alcohol use	21	2	3.19e-05	0.00588	SLC39A8, SLC39A13
High-Density Lipoproteins	GWAS catalog reported genes	C-reactive protein	22	2	3.5e-05	0.0062	TOMM40, HNF4A
High-Density Lipoproteins	GWAS catalog reported genes	Triglyceride levels	548	4	4.82e-05	0.0082	SLC39A8, FADS2, PGS1, PLA2G6
High-Density Lipoproteins	GWAS catalog reported genes	Gallstone disease	27	2	5.32e-05	0.00872	FADS2, HNF4A
High-Density Lipoproteins	GWAS catalog reported genes	Alcohol use disorder (total score)	28	2	5.73e-05	0.00905	SLC39A8, SLC39A13
High-Density Lipoproteins	GWAS catalog reported genes	Apolipoprotein B levels	203	3	6.6e-05	0.0101	FADS2, PGS1, HNF4A
High-Density Lipoproteins	GWAS catalog reported genes	Body fat percentage	32	2	7.51e-05	0.0111	TOMM40, PLA2G6
High-Density Lipoproteins	GWAS catalog reported genes	HDL cholesterol levels x long total sleep time interaction (2df test)	35	2	9e-05	0.0128	PGS1, HNF4A
High-Density Lipoproteins	GWAS catalog reported genes	Alzheimer's disease or fasting glucose levels (pleiotropy)	44	2	0.000143	0.0198	SLC39A13, MTCH2
High-Density Lipoproteins	GWAS catalog reported genes	Hemoglobin levels	319	3	0.000251	0.0337	SLC39A8, FADS2, HNF4A
High-Density Lipoproteins	GWAS catalog reported genes	Serum metabolite levels	333	3	0.000285	0.0353	MTCH2, FADS2, TOMM40
High-Density Lipoproteins	GWAS catalog reported genes	Loneliness (MTAG)	63	2	0.000294	0.0353	SLC39A13, MTCH2
High-Density Lipoproteins	GWAS catalog reported genes	Hemoglobin	339	3	0.0003	0.0353	SLC39A8, PGS1, HNF4A
High-Density Lipoproteins	GWAS catalog reported genes	Body mass index in physically active individuals	64	2	0.000303	0.0353	SLC39A8, MTCH2
High-Density Lipoproteins	GWAS catalog reported genes	LDL cholesterol levels in current drinkers	64	2	0.000303	0.0353	FADS2, HNF4A
High-Density Lipoproteins	GWAS catalog reported genes	Hematocrit	346	3	0.000319	0.0362	SLC39A8, FADS2, HNF4A
High-Density Lipoproteins	GWAS catalog reported genes	Walking pace	70	2	0.000363	0.0372	SLC39A8, MTCH2
High-Density Lipoproteins	GWAS catalog reported genes	Body mass index (joint analysis main effects and physical activity interaction)	73	2	0.000394	0.0372	SLC39A8, MTCH2
High-Density Lipoproteins	GWAS catalog reported genes	Triglyceride levels in current drinkers	73	2	0.000394	0.0372	FADS2, PGS1
High-Density Lipoproteins	GWAS catalog reported genes	Lipoprotein (a) levels	78	2	0.00045	0.0388	PGS1, TOMM40
High-Density Lipoproteins	GWAS catalog reported genes	Sleep duration (short sleep)	79	2	0.000462	0.0388	SLC39A8, MTCH2
High-Density Lipoproteins	GWAS catalog reported genes	Platelet distribution width	395	3	0.00047	0.0388	SLC39A8, FADS2, PLA2G6
High-Density Lipoproteins	GWAS catalog reported genes	Triglyceride levels x alcohol consumption (regular vs non-regular drinkers) interaction (2df)	80	2	0.000473	0.0388	FADS2, PGS1
High-Density Lipoproteins	GWAS catalog reported genes	Triglyceride levels x alcohol consumption (drinkers vs non-drinkers) interaction (2df)	80	2	0.000473	0.0388	FADS2, PGS1
High-Density Lipoproteins	GWAS catalog reported genes	LDL cholesterol levels x alcohol consumption (regular vs non-regular drinkers) interaction (2df)	82	2	0.000497	0.04	FADS2, HNF4A
High-Density Lipoproteins	GWAS catalog reported genes	Sum neutrophil eosinophil counts	88	2	0.000572	0.0437	FADS2, HNF4A
High-Density Lipoproteins	GWAS catalog reported genes	C-reactive protein levels	88	2	0.000572	0.0437	HNF4A, PLA2G6
High-Density Lipoproteins	GWAS catalog reported genes	Granulocyte count	88	2	0.000572	0.0437	FADS2, HNF4A
High-Density Lipoproteins	GWAS catalog reported genes	Loneliness	91	2	0.000612	0.0451	SLC39A13, MTCH2
High-Density Lipoproteins	GWAS catalog reported genes	Myeloid white cell count	91	2	0.000612	0.0451	FADS2, HNF4A
Diastolic Blood Pressure	Positional gene sets (MsigDB c1)	chr6p21	325	3	9.38e-06	0.00282	TUBB, ATP6V1G2, VARS
Diastolic Blood Pressure	Chemical and Genetic pertubation gene sets (MsigDB c2)	MODY_HIPPOCAMPUS_NEONATAL	33	2	1.07e-05	0.0365	TUBB, VARS
Cholesterol	GWAS catalog reported genes	Cholesterol	101	3	6.92e-07	0.00306	KANK2, TOMM40, HNF4A
Cholesterol	GWAS catalog reported genes	HDL cholesterol	197	3	5.18e-06	0.0115	KANK2, TOMM40, HNF4A
Cholesterol	GWAS catalog reported genes	C-reactive protein	22	2	7.81e-06	0.0115	TOMM40, HNF4A
Cholesterol	GWAS catalog reported genes	Alzheimer's disease or HDL levels (pleiotropy)	51	2	4.3e-05	0.0476	CEACAM19, TOMM40
