# Supplementary material for: Mitochondrial related variants associated with cardiovascular traits
Source: Front Physiol. 2024 Aug 27;15:1395371. doi: 10.3389/fphys.2024.1395371 (PMC11385366; doi:10.3389/fphys.2024.1395371)
Supplement: Supplementary file 12 [file Table1.xlsx]

## Sheet: CAD
PHENO	COHORT	ARRAY	GENE	REGION	DESCRIPTION	BP	RS	REF	ALT	A1	OBS_CT	OR.or.BETA	SE.or.LOG(OR)_SE	P	SP2
CAD	Overall	BiLEVE	MT-HV2	CR:HVS2	Hypervariable segment 2 [classic:73-340 ]	73	rs869183622	G	A	A	40763	1.05853	0.0492742	0.248338	NA
CAD	noDM	BiLEVE	MT-HV2	CR:HVS2	Hypervariable segment 2 [classic:73-340 ]	73	rs869183622	G	A	A	36196	1.10199	0.0563078	0.0845748	NA
CAD	DM	BiLEVE	MT-HV2	CR:HVS2	Hypervariable segment 2 [classic:73-340 ]	73	rs869183622	G	A	A	4567	0.926381	0.101916	0.453062	NA
CAD	Overall	UKB	MT-HV2	CR:HVS2	Hypervariable segment 2 [classic:73-340 ]	73	rs869183622	G	A	A	337073	0.984364	0.020033	0.431465	NA
CAD	noDM	UKB	MT-HV2	CR:HVS2	Hypervariable segment 2 [classic:73-340 ]	73	rs869183622	G	A	A	305299	1.00254	0.0224313	0.910134	NA
CAD	DM	UKB	MT-HV2	CR:HVS2	Hypervariable segment 2 [classic:73-340 ]	73	rs869183622	G	A	A	31774	0.916357	0.0444253	0.0492761	NA
CAD	Overall	BiLEVE	MT-OHR	CR:OH	H-strand origins	150	rs62581312	C	T	T	40737	1.00875	0.0836855	0.917084	NA
CAD	noDM	BiLEVE	MT-OHR	CR:OH	H-strand origins	150	rs62581312	C	T	T	36174	1.01736	0.0956042	0.8571	NA
CAD	DM	BiLEVE	MT-OHR	CR:OH	H-strand origins	150	rs62581312	C	T	T	4563	0.981338	0.172883	0.913228	NA
CAD	Overall	UKB	MT-OHR	CR:OH	H-strand origins	150	rs62581312	C	T	T	336898	0.967955	0.0347748	0.348975	NA
CAD	noDM	UKB	MT-OHR	CR:OH	H-strand origins	150	rs62581312	C	T	T	305122	0.955052	0.0391623	0.240258	NA
CAD	DM	UKB	MT-OHR	CR:OH	H-strand origins	150	rs62581312	C	T	T	31776	1.01788	0.075652	0.814767	NA
CAD	Overall	BiLEVE	MT-OHR	CR:OH	H-strand origins	228	rs41323649	G	A	A	40717	1.12258	0.0948639	0.222866	NA
CAD	noDM	BiLEVE	MT-OHR	CR:OH	H-strand origins	228	rs41323649	G	A	A	36154	0.996058	0.112953	0.972104	NA
CAD	DM	BiLEVE	MT-OHR	CR:OH	H-strand origins	228	rs41323649	G	A	A	4563	1.60776	0.18016	0.00839714	NA
CAD	Overall	UKB	MT-OHR	CR:OH	H-strand origins	228	rs41323649	G	A	A	336661	1.05131	0.0397215	0.207787	NA
CAD	noDM	UKB	MT-OHR	CR:OH	H-strand origins	228	rs41323649	G	A	A	304902	1.04177	0.0446943	0.359864	NA
CAD	DM	UKB	MT-OHR	CR:OH	H-strand origins	228	rs41323649	G	A	A	31759	1.08416	0.0866372	0.351007	NA
CAD	Overall	BiLEVE	MT-TFX	CR:TFX	mtTF1 binding site	239	rs879149197	T	C	C	40734	1.05357	0.14628	0.721263	NA
CAD	noDM	BiLEVE	MT-TFX	CR:TFX	mtTF1 binding site	239	rs879149197	T	C	C	36167	0.902391	0.174881	0.557002	NA
CAD	DM	BiLEVE	MT-TFX	CR:TFX	mtTF1 binding site	239	rs879149197	T	C	C	4567	1.68614	0.277098	0.0593745	NA
CAD	Overall	BiLEVE	MT-OHR	CR:OH	H-strand origins	263	rs2853515	G	A	A	40794	0.882278	0.247344	0.612598	NA
CAD	noDM	BiLEVE	MT-OHR	CR:OH	H-strand origins	263	rs2853515	G	A	A	36227	1.05324	0.261456	0.842727	NA
CAD	DM	BiLEVE	MT-OHR	CR:OH	H-strand origins	263	rs2853515	G	A	A	4567	0.365745	0.734556	0.170909	NA
CAD	Overall	UKB	MT-TFY	CR:TFY	mtTF1 binding site	295	rs41528348	C	T	T	334925	1.1048	0.031047	0.00132724	NA
CAD	noDM	UKB	MT-TFY	CR:TFY	mtTF1 binding site	295	rs41528348	C	T	T	303324	1.11535	0.0347933	0.00170289	NA
CAD	DM	UKB	MT-TFY	CR:TFY	mtTF1 binding site	295	rs41528348	C	T	T	31601	1.06764	0.0685011	0.339347	NA
CAD	Overall	BiLEVE	MT-HV3	CR:HVS3	Hypervariable segment 3	456	rs41356551	C	T	T	40689	0.914944	0.129488	0.492404	NA
CAD	noDM	BiLEVE	MT-HV3	CR:HVS3	Hypervariable segment 3	456	rs41356551	C	T	T	36131	0.926526	0.148026	0.606179	NA
CAD	DM	BiLEVE	MT-HV3	CR:HVS3	Hypervariable segment 3	456	rs41356551	C	T	T	4558	0.87937	0.266969	0.63015	NA
CAD	Overall	BiLEVE	MT-HV3	CR:HVS3	Hypervariable segment 3	497	rs28660704	C	T	T	40805	1.08076	0.111599	0.486499	NA
CAD	noDM	BiLEVE	MT-HV3	CR:HVS3	Hypervariable segment 3	497	rs28660704	C	T	T	36232	1.09095	0.126249	0.490506	NA
CAD	DM	BiLEVE	MT-HV3	CR:HVS3	Hypervariable segment 3	497	rs28660704	C	T	T	4573	1.05167	0.238489	0.832711	NA
CAD	Overall	UKB	MT-HV3	CR:HVS3	Hypervariable segment 3	497	rs28660704	C	T	T	337357	1.02514	0.0466457	0.59452	NA
CAD	noDM	UKB	MT-HV3	CR:HVS3	Hypervariable segment 3	497	rs28660704	C	T	T	305546	1.01864	0.0523056	0.723999	NA
CAD	DM	UKB	MT-HV3	CR:HVS3	Hypervariable segment 3	497	rs28660704	C	T	T	31811	1.05158	0.103023	0.62544	NA
CAD	Overall	BiLEVE	MT-RNR1	12S	12S ribosomal RNA	709	rs2853517	G	A	A	40644	0.907907	0.0707573	0.172122	NA
CAD	noDM	BiLEVE	MT-RNR1	12S	12S ribosomal RNA	709	rs2853517	G	A	A	36094	0.869887	0.0825289	0.0912167	NA
CAD	DM	BiLEVE	MT-RNR1	12S	12S ribosomal RNA	709	rs2853517	G	A	A	4550	1.02933	0.138918	0.835181	NA
CAD	Overall	UKB	MT-RNR1	12S	12S ribosomal RNA	709	rs2853517	G	A	A	335772	0.97664	0.0284334	0.405801	NA
CAD	noDM	UKB	MT-RNR1	12S	12S ribosomal RNA	709	rs2853517	G	A	A	304104	0.976306	0.0318432	0.451426	NA
CAD	DM	UKB	MT-RNR1	12S	12S ribosomal RNA	709	rs2853517	G	A	A	31668	0.974535	0.0630118	0.682277	NA
CAD	Overall	UKB	MT-RNR1	12S	12S ribosomal RNA	750	rs2853518	G	A	A	330192	0.944119	0.0795936	0.470017	NA
CAD	noDM	UKB	MT-RNR1	12S	12S ribosomal RNA	750	rs2853518	G	A	A	299178	0.933642	0.0891714	0.441301	NA
CAD	DM	UKB	MT-RNR1	12S	12S ribosomal RNA	750	rs2853518	G	A	A	31014	0.979205	0.176691	0.90533	NA
CAD	Overall	BiLEVE	MT-RNR1	12S	12S ribosomal RNA	1243	rs28358572	T	C	C	40825	1.04278	0.173446	0.809143	NA
CAD	noDM	BiLEVE	MT-RNR1	12S	12S ribosomal RNA	1243	rs28358572	T	C	C	36250	0.692828	0.237962	0.123037	NA
CAD	DM	BiLEVE	MT-RNR1	12S	12S ribosomal RNA	1243	rs28358572	T	C	C	4575	2.26399	0.277917	0.0032801	NA
CAD	Overall	UKB	MT-RNR1	12S	12S ribosomal RNA	1243	rs28358572	T	C	C	337609	1.03098	0.0700881	0.663385	NA
CAD	noDM	UKB	MT-RNR1	12S	12S ribosomal RNA	1243	rs28358572	T	C	C	305776	1.02883	0.0779986	0.715537	NA
CAD	DM	UKB	MT-RNR1	12S	12S ribosomal RNA	1243	rs28358572	T	C	C	31833	1.03147	0.159352	0.845815	NA
CAD	Overall	BiLEVE	MT-RNR1	12S	12S ribosomal RNA	1438	rs2001030	G	A	A	40759	0.942788	0.151975	0.69827	NA
CAD	noDM	BiLEVE	MT-RNR1	12S	12S ribosomal RNA	1438	rs2001030	G	A	A	36191	0.942338	0.177413	0.737802	NA
CAD	DM	BiLEVE	MT-RNR1	12S	12S ribosomal RNA	1438	rs2001030	G	A	A	4568	0.970404	0.295251	0.918951	NA
CAD	Overall	UKB	MT-RNR1	12S	12S ribosomal RNA	1438	rs2001030	G	A	A	336972	0.972072	0.0608317	0.641481	NA
CAD	noDM	UKB	MT-RNR1	12S	12S ribosomal RNA	1438	rs2001030	G	A	A	305191	0.952035	0.0691255	0.47704	NA
CAD	DM	UKB	MT-RNR1	12S	12S ribosomal RNA	1438	rs2001030	G	A	A	31781	1.04539	0.128396	0.729541	NA
CAD	Overall	BiLEVE	MT-RNR2	16S	16S ribosomal RNA	1719	rs3928305	G	A	A	40740	0.884963	0.0930256	0.188942	NA
CAD	noDM	BiLEVE	MT-RNR2	16S	16S ribosomal RNA	1719	rs3928305	G	A	A	36172	0.8752	0.106318	0.209911	NA
CAD	DM	BiLEVE	MT-RNR2	16S	16S ribosomal RNA	1719	rs3928305	G	A	A	4568	0.901319	0.193028	0.590408	NA
CAD	Overall	UKB	MT-RNR2	16S	16S ribosomal RNA	1719	rs3928305	G	A	A	336982	1.01916	0.0359757	0.597893	NA
CAD	noDM	UKB	MT-RNR2	16S	16S ribosomal RNA	1719	rs3928305	G	A	A	305203	0.991389	0.0407056	0.831753	NA
CAD	DM	UKB	MT-RNR2	16S	16S ribosomal RNA	1719	rs3928305	G	A	A	31779	1.13414	0.0771625	0.102822	NA
CAD	Overall	BiLEVE	MT-RNR2	16S	16S ribosomal RNA	1721	rs200626438	C	T	T	40820	0.86134	0.159561	0.349541	NA
CAD	noDM	BiLEVE	MT-RNR2	16S	16S ribosomal RNA	1721	rs200626438	C	T	T	36245	0.872958	0.180251	0.450986	NA
CAD	DM	BiLEVE	MT-RNR2	16S	16S ribosomal RNA	1721	rs200626438	C	T	T	4575	0.807167	0.342417	0.531561	NA
CAD	Overall	UKB	MT-RNR2	16S	16S ribosomal RNA	1721	rs200626438	C	T	T	337507	0.990505	0.0621543	0.878003	NA
CAD	noDM	UKB	MT-RNR2	16S	16S ribosomal RNA	1721	rs200626438	C	T	T	305674	0.908712	0.0720171	0.183774	NA
CAD	DM	UKB	MT-RNR2	16S	16S ribosomal RNA	1721	rs200626438	C	T	T	31833	1.33189	0.125239	0.0221134	NA
CAD	Overall	BiLEVE	MT-RNR2	16S	16S ribosomal RNA	1811	rs28358576	A	G	G	40788	0.994809	0.0734491	0.943514	NA
CAD	noDM	BiLEVE	MT-RNR2	16S	16S ribosomal RNA	1811	rs28358576	A	G	G	36217	0.991774	0.0839064	0.921581	NA
CAD	DM	BiLEVE	MT-RNR2	16S	16S ribosomal RNA	1811	rs28358576	A	G	G	4571	1.0169	0.152005	0.912192	NA
CAD	Overall	UKB	MT-RNR2	16S	16S ribosomal RNA	2158	rs41349444	T	C	C	337608	1.2306	0.0775722	0.00747298	NA
CAD	noDM	UKB	MT-RNR2	16S	16S ribosomal RNA	2158	rs41349444	T	C	C	305771	1.25557	0.0869075	0.00882457	NA
CAD	DM	UKB	MT-RNR2	16S	16S ribosomal RNA	2158	rs41349444	T	C	C	31837	1.14758	0.17079	0.42025	NA
CAD	Overall	BiLEVE	MT-RNR2	16S	16S ribosomal RNA	2706	rs2854128	G	A	A	40786	1.01646	0.0494439	0.741318	NA
CAD	noDM	BiLEVE	MT-RNR2	16S	16S ribosomal RNA	2706	rs2854128	G	A	A	36211	1.07297	0.056438	0.212071	NA
CAD	DM	BiLEVE	MT-RNR2	16S	16S ribosomal RNA	2706	rs2854128	G	A	A	4575	0.851629	0.102926	0.118667	NA
CAD	Overall	UKB	MT-RNR2	16S	16S ribosomal RNA	2706	rs2854128	G	A	A	337170	0.985486	0.020082	0.466608	NA
CAD	noDM	UKB	MT-RNR2	16S	16S ribosomal RNA	2706	rs2854128	G	A	A	305375	0.987758	0.022496	0.583994	NA
CAD	DM	UKB	MT-RNR2	16S	16S ribosomal RNA	2706	rs2854128	G	A	A	31795	0.976381	0.0444552	0.590806	NA
CAD	Overall	BiLEVE	MT-RNR2	16S	16S ribosomal RNA	3010	rs3928306	G	A	A	40767	1.02212	0.0555144	0.693476	NA
CAD	noDM	BiLEVE	MT-RNR2	16S	16S ribosomal RNA	3010	rs3928306	G	A	A	36200	1.02517	0.063465	0.695245	NA
CAD	DM	BiLEVE	MT-RNR2	16S	16S ribosomal RNA	3010	rs3928306	G	A	A	4567	1.01655	0.114475	0.885988	NA
CAD	Overall	UKB	MT-RNR2	16S	16S ribosomal RNA	3010	rs3928306	G	A	A	336890	1.02989	0.0225429	0.191404	NA
CAD	noDM	UKB	MT-RNR2	16S	16S ribosomal RNA	3010	rs3928306	G	A	A	305125	1.03114	0.0252693	0.224904	NA
CAD	DM	UKB	MT-RNR2	16S	16S ribosomal RNA	3010	rs3928306	G	A	A	31765	1.02532	0.0497749	0.615412	NA
CAD	Overall	BiLEVE	MT-RNR2	16S	16S ribosomal RNA	3197	rs2854131	T	C	C	40713	0.955022	0.0864009	0.594283	NA
CAD	noDM	BiLEVE	MT-RNR2	16S	16S ribosomal RNA	3197	rs2854131	T	C	C	36150	0.992387	0.0975692	0.937572	NA
CAD	DM	BiLEVE	MT-RNR2	16S	16S ribosomal RNA	3197	rs2854131	T	C	C	4563	0.838121	0.184527	0.338565	NA
CAD	Overall	UKB	MT-RNR2	16S	16S ribosomal RNA	3197	rs2854131	T	C	C	336900	0.976331	0.0348721	0.492145	NA
CAD	noDM	UKB	MT-RNR2	16S	16S ribosomal RNA	3197	rs2854131	T	C	C	305132	0.979391	0.0390185	0.593545	NA
CAD	DM	UKB	MT-RNR2	16S	16S ribosomal RNA	3197	rs2854131	T	C	C	31768	0.965423	0.0775199	0.649872	NA
CAD	Overall	UKB	MT-ND1	ND1	NADH Dehydrogenase subunit 1	3394	rs41460449	T	C	C	337010	1.07413	0.0802827	0.373055	NA
CAD	noDM	UKB	MT-ND1	ND1	NADH Dehydrogenase subunit 1	3394	rs41460449	T	C	C	305223	1.08205	0.0895942	0.37878	NA
CAD	DM	UKB	MT-ND1	ND1	NADH Dehydrogenase subunit 1	3394	rs41460449	T	C	C	31787	1.03866	0.180159	0.833233	NA
CAD	Overall	BiLEVE	MT-ND1	ND1	NADH Dehydrogenase subunit 1	3480	rs28358584	A	G	G	40796	0.938177	0.0902097	0.479302	NA
CAD	noDM	BiLEVE	MT-ND1	ND1	NADH Dehydrogenase subunit 1	3480	rs28358584	A	G	G	36223	0.957128	0.101942	0.667319	NA
CAD	DM	BiLEVE	MT-ND1	ND1	NADH Dehydrogenase subunit 1	3480	rs28358584	A	G	G	4573	0.884076	0.19303	0.523276	NA
CAD	Overall	UKB	MT-ND1	ND1	NADH Dehydrogenase subunit 1	3480	rs28358584	A	G	G	337340	0.962942	0.0361505	0.296211	NA
CAD	noDM	UKB	MT-ND1	ND1	NADH Dehydrogenase subunit 1	3480	rs28358584	A	G	G	305530	0.950911	0.0406507	0.215629	NA
CAD	DM	UKB	MT-ND1	ND1	NADH Dehydrogenase subunit 1	3480	rs28358584	A	G	G	31810	1.01009	0.0790789	0.898988	NA
CAD	Overall	UKB	MT-ND1	ND1	NADH Dehydrogenase subunit 1	3720	rs41355750	A	G	G	337015	0.908141	0.0956581	0.313794	NA
CAD	noDM	UKB	MT-ND1	ND1	NADH Dehydrogenase subunit 1	3720	rs41355750	A	G	G	305242	0.909963	0.107454	0.379911	NA
CAD	DM	UKB	MT-ND1	ND1	NADH Dehydrogenase subunit 1	3720	rs41355750	A	G	G	31773	0.901527	0.20942	0.620593	NA
CAD	Overall	BiLEVE	MT-ND1	ND1	NADH Dehydrogenase subunit 1	3796	rs28357970	A	G	G	40786	1.20604	0.178535	0.294017	NA
CAD	noDM	BiLEVE	MT-ND1	ND1	NADH Dehydrogenase subunit 1	3796	rs28357970	A	G	G	36213	1.18891	0.204171	0.396701	NA
CAD	DM	BiLEVE	MT-ND1	ND1	NADH Dehydrogenase subunit 1	3796	rs28357970	A	G	G	4573	1.22415	0.369032	0.583665	NA
CAD	Overall	UKB	MT-ND1	ND1	NADH Dehydrogenase subunit 1	3796	rs28357970	A	G	G	337288	1.04681	0.077875	0.556905	NA
CAD	noDM	UKB	MT-ND1	ND1	NADH Dehydrogenase subunit 1	3796	rs28357970	A	G	G	305482	1.07944	0.0862598	0.375545	NA
CAD	DM	UKB	MT-ND1	ND1	NADH Dehydrogenase subunit 1	3796	rs28357970	A	G	G	31806	0.923021	0.179321	0.65509	NA
CAD	Overall	UKB	MT-ND1	ND1	NADH Dehydrogenase subunit 1	3915	rs41524046,COSM1138362,COSM1138363	G	A	A	337252	0.904267	0.0649981	0.121573	NA
CAD	noDM	UKB	MT-ND1	ND1	NADH Dehydrogenase subunit 1	3915	rs41524046,COSM1138362,COSM1138363	G	A	A	305440	0.897478	0.0733274	0.140182	NA
CAD	DM	UKB	MT-ND1	ND1	NADH Dehydrogenase subunit 1	3915	rs41524046,COSM1138362,COSM1138363	G	A	A	31812	0.925598	0.140395	0.581841	NA
CAD	Overall	BiLEVE	MT-ND1	ND1	NADH Dehydrogenase subunit 1	3992	rs879051705	C	T	T	40803	1.30756	0.152062	0.0778122	NA
CAD	noDM	BiLEVE	MT-ND1	ND1	NADH Dehydrogenase subunit 1	3992	rs879051705	C	T	T	36230	1.30073	0.170511	0.123078	NA
CAD	DM	BiLEVE	MT-ND1	ND1	NADH Dehydrogenase subunit 1	3992	rs879051705	C	T	T	4573	1.29929	0.338363	0.439065	NA
CAD	Overall	UKB	MT-ND1	ND1	NADH Dehydrogenase subunit 1	3992	rs879051705	C	T	T	337313	0.927483	0.0685335	0.272006	NA
CAD	noDM	UKB	MT-ND1	ND1	NADH Dehydrogenase subunit 1	3992	rs879051705	C	T	T	305497	0.884476	0.0786403	0.118517	NA
CAD	DM	UKB	MT-ND1	ND1	NADH Dehydrogenase subunit 1	3992	rs879051705	C	T	T	31816	1.09928	0.14103	0.50211	NA
CAD	Overall	BiLEVE	MT-ND1	ND1	NADH Dehydrogenase subunit 1	4024	-	A	G	G	40791	1.27013	0.165349	0.148134	NA
CAD	noDM	BiLEVE	MT-ND1	ND1	NADH Dehydrogenase subunit 1	4024	-	A	G	G	36221	1.23626	0.187409	0.257753	NA
CAD	DM	BiLEVE	MT-ND1	ND1	NADH Dehydrogenase subunit 1	4024	-	A	G	G	4570	1.3889	0.355973	0.356079	NA
CAD	Overall	UKB	MT-ND1	ND1	NADH Dehydrogenase subunit 1	4024	-	A	G	G	337398	0.880764	0.075961	0.094632	NA
CAD	noDM	UKB	MT-ND1	ND1	NADH Dehydrogenase subunit 1	4024	-	A	G	G	305587	0.860676	0.0864657	0.0827005	NA
CAD	DM	UKB	MT-ND1	ND1	NADH Dehydrogenase subunit 1	4024	-	A	G	G	31811	0.962746	0.159576	0.811944	NA
CAD	Overall	BiLEVE	MT-ND1	ND1	NADH Dehydrogenase subunit 1	4216	COSM1138370,COSM1138371	T	C	C	40746	0.987738	0.0596677	0.836182	NA
CAD	noDM	BiLEVE	MT-ND1	ND1	NADH Dehydrogenase subunit 1	4216	COSM1138370,COSM1138371	T	C	C	36181	0.989463	0.0684585	0.877027	NA
CAD	DM	BiLEVE	MT-ND1	ND1	NADH Dehydrogenase subunit 1	4216	COSM1138370,COSM1138371	T	C	C	4565	0.983499	0.121938	0.891462	NA
CAD	Overall	UKB	MT-ND1	ND1	NADH Dehydrogenase subunit 1	4216	COSM1138370,COSM1138371	T	C	C	337132	1.04677	0.0241042	0.0579109	NA
CAD	noDM	UKB	MT-ND1	ND1	NADH Dehydrogenase subunit 1	4216	COSM1138370,COSM1138371	T	C	C	305341	1.04609	0.0270356	0.095559	NA
CAD	DM	UKB	MT-ND1	ND1	NADH Dehydrogenase subunit 1	4216	COSM1138370,COSM1138371	T	C	C	31791	1.04892	0.0531058	0.368505	NA
CAD	Overall	BiLEVE	MT-TQ	Q	tRNA glutamine	4336	rs41456348	T	C	C	40744	0.799587	0.17803	0.209004	NA
CAD	noDM	BiLEVE	MT-TQ	Q	tRNA glutamine	4336	rs41456348	T	C	C	36170	0.77941	0.208096	0.23107	NA
CAD	DM	BiLEVE	MT-TQ	Q	tRNA glutamine	4336	rs41456348	T	C	C	4574	0.857111	0.346081	0.655941	NA
CAD	Overall	UKB	MT-TQ	Q	tRNA glutamine	4336	rs41456348	T	C	C	337285	0.997025	0.0656306	0.963789	NA
CAD	noDM	UKB	MT-TQ	Q	tRNA glutamine	4336	rs41456348	T	C	C	305485	1.04315	0.0720807	0.557787	NA
CAD	DM	UKB	MT-TQ	Q	tRNA glutamine	4336	rs41456348	T	C	C	31800	0.822118	0.156975	0.21211	NA
CAD	Overall	UKB	MT-ND2	ND2	NADH dehydrogenase subunit 2	4529	-	A	T	T	337497	1.12522	0.053601	0.0277363	NA
CAD	noDM	UKB	MT-ND2	ND2	NADH dehydrogenase subunit 2	4529	-	A	T	T	305668	1.08232	0.0612103	0.196206	NA
CAD	DM	UKB	MT-ND2	ND2	NADH dehydrogenase subunit 2	4529	-	A	T	T	31829	1.29505	0.11182	0.0207675	NA
CAD	Overall	BiLEVE	MT-ND2	ND2	NADH dehydrogenase subunit 2	4561	-	T	C	C	40805	0.615548	0.268413	0.0706339	NA
CAD	noDM	BiLEVE	MT-ND2	ND2	NADH dehydrogenase subunit 2	4561	-	T	C	C	36233	0.548522	0.324755	0.0644331	NA
CAD	DM	BiLEVE	MT-ND2	ND2	NADH dehydrogenase subunit 2	4561	-	T	C	C	4572	0.843442	0.486576	0.726396	NA
CAD	Overall	UKB	MT-ND2	ND2	NADH dehydrogenase subunit 2	4561	-	T	C	C	337340	0.893281	0.0951471	0.235585	NA
CAD	noDM	UKB	MT-ND2	ND2	NADH dehydrogenase subunit 2	4561	-	T	C	C	305530	0.928947	0.104788	0.481834	NA
CAD	DM	UKB	MT-ND2	ND2	NADH dehydrogenase subunit 2	4561	-	T	C	C	31810	0.757996	0.225065	0.218284	NA
CAD	Overall	BiLEVE	MT-ND2	ND2	NADH dehydrogenase subunit 2	4580	-	G	A	A	40694	1.13397	0.130433	0.335089	NA
CAD	noDM	BiLEVE	MT-ND2	ND2	NADH dehydrogenase subunit 2	4580	-	G	A	A	36137	1.10701	0.151678	0.502697	NA
CAD	DM	BiLEVE	MT-ND2	ND2	NADH dehydrogenase subunit 2	4580	-	G	A	A	4557	1.20222	0.25693	0.473485	NA
CAD	Overall	UKB	MT-ND2	ND2	NADH dehydrogenase subunit 2	4580	-	G	A	A	336488	1.04283	0.0540075	0.437388	NA
CAD	noDM	UKB	MT-ND2	ND2	NADH dehydrogenase subunit 2	4580	-	G	A	A	304763	1.10271	0.0594919	0.100304	NA
CAD	DM	UKB	MT-ND2	ND2	NADH dehydrogenase subunit 2	4580	-	G	A	A	31725	0.83022	0.126909	0.142616	NA
CAD	Overall	BiLEVE	MT-ND2	ND2	NADH dehydrogenase subunit 2	4646	rs375312364	T	C	C	40815	1.04571	0.162665	0.783487	NA
CAD	noDM	BiLEVE	MT-ND2	ND2	NADH dehydrogenase subunit 2	4646	rs375312364	T	C	C	36241	0.990816	0.191639	0.9616	NA
CAD	DM	BiLEVE	MT-ND2	ND2	NADH dehydrogenase subunit 2	4646	rs375312364	T	C	C	4574	1.21447	0.312014	0.533451	NA
CAD	Overall	BiLEVE	MT-ND2	ND2	NADH dehydrogenase subunit 2	4769	rs3021086	G	A	A	40762	1.04696	0.154231	0.766046	NA
CAD	noDM	BiLEVE	MT-ND2	ND2	NADH dehydrogenase subunit 2	4769	rs3021086	G	A	A	36195	1.07193	0.178065	0.696476	NA
CAD	DM	BiLEVE	MT-ND2	ND2	NADH dehydrogenase subunit 2	4769	rs3021086	G	A	A	4567	1.0022	0.307616	0.994309	NA
CAD	Overall	UKB	MT-ND2	ND2	NADH dehydrogenase subunit 2	4769	rs3021086	G	A	A	337306	0.966803	0.0639968	0.597825	NA
CAD	noDM	UKB	MT-ND2	ND2	NADH dehydrogenase subunit 2	4769	rs3021086	G	A	A	305499	0.946043	0.0725886	0.44479	NA
CAD	DM	UKB	MT-ND2	ND2	NADH dehydrogenase subunit 2	4769	rs3021086	G	A	A	31807	1.04438	0.13596	0.749451	NA
CAD	Overall	BiLEVE	MT-ND2	ND2	NADH dehydrogenase subunit 2	4793	-	A	G	G	40777	1.24451	0.198356	0.270121	NA
CAD	noDM	BiLEVE	MT-ND2	ND2	NADH dehydrogenase subunit 2	4793	-	A	G	G	36208	1.24714	0.220529	0.316593	NA
CAD	DM	BiLEVE	MT-ND2	ND2	NADH dehydrogenase subunit 2	4793	-	A	G	G	4569	1.21455	0.452213	0.667326	NA
CAD	Overall	UKB	MT-ND2	ND2	NADH dehydrogenase subunit 2	4793	-	A	G	G	337310	0.986125	0.0864823	0.871653	NA
CAD	noDM	UKB	MT-ND2	ND2	NADH dehydrogenase subunit 2	4793	-	A	G	G	305497	0.921889	0.0998612	0.415398	NA
CAD	DM	UKB	MT-ND2	ND2	NADH dehydrogenase subunit 2	4793	-	A	G	G	31813	1.24399	0.175182	0.212665	NA
CAD	Overall	BiLEVE	MT-ND2	ND2	NADH dehydrogenase subunit 2	4917	rs28357980	A	G	G	40751	0.878434	0.0851429	0.127929	NA
CAD	noDM	BiLEVE	MT-ND2	ND2	NADH dehydrogenase subunit 2	4917	rs28357980	A	G	G	36182	0.926028	0.0963902	0.425284	NA
CAD	DM	BiLEVE	MT-ND2	ND2	NADH dehydrogenase subunit 2	4917	rs28357980	A	G	G	4569	0.735497	0.180165	0.0881645	NA
CAD	Overall	UKB	MT-ND2	ND2	NADH dehydrogenase subunit 2	4917	rs28357980	A	G	G	337081	1.00205	0.0333662	0.95095	NA
CAD	noDM	UKB	MT-ND2	ND2	NADH dehydrogenase subunit 2	4917	rs28357980	A	G	G	305291	0.993607	0.0374791	0.864124	NA
CAD	DM	UKB	MT-ND2	ND2	NADH dehydrogenase subunit 2	4917	rs28357980	A	G	G	31790	1.03271	0.0732046	0.660171	NA
CAD	Overall	BiLEVE	MT-ND2	ND2	NADH dehydrogenase subunit 2	5004	-	T	C	C	40793	1.27006	0.159948	0.135005	NA
CAD	noDM	BiLEVE	MT-ND2	ND2	NADH dehydrogenase subunit 2	5004	-	T	C	C	36221	1.23235	0.181924	0.250809	NA
CAD	DM	BiLEVE	MT-ND2	ND2	NADH dehydrogenase subunit 2	5004	-	T	C	C	4572	1.40283	0.340269	0.319844	NA
CAD	Overall	UKB	MT-ND2	ND2	NADH dehydrogenase subunit 2	5004	-	T	C	C	337372	0.886373	0.0735497	0.101016	NA
CAD	noDM	UKB	MT-ND2	ND2	NADH dehydrogenase subunit 2	5004	-	T	C	C	305551	0.864714	0.0836908	0.0824187	NA
CAD	DM	UKB	MT-ND2	ND2	NADH dehydrogenase subunit 2	5004	-	T	C	C	31821	0.973328	0.154716	0.86129	NA
CAD	Overall	UKB	MT-ND2	ND2	NADH dehydrogenase subunit 2	5046	rs878927053	G	A	A	336894	1.04371	0.0693662	0.537366	NA
CAD	noDM	UKB	MT-ND2	ND2	NADH dehydrogenase subunit 2	5046	rs878927053	G	A	A	305118	1.05685	0.0766304	0.470573	NA
CAD	DM	UKB	MT-ND2	ND2	NADH dehydrogenase subunit 2	5046	rs878927053	G	A	A	31776	0.97646	0.16232	0.883325	NA
CAD	Overall	BiLEVE	MT-ND2	ND2	NADH dehydrogenase subunit 2	5147	rs367778601	G	A	A	40765	0.8951	0.108733	0.308111	NA
CAD	noDM	BiLEVE	MT-ND2	ND2	NADH dehydrogenase subunit 2	5147	rs367778601	G	A	A	36197	0.970233	0.121004	0.80279	NA
CAD	DM	BiLEVE	MT-ND2	ND2	NADH dehydrogenase subunit 2	5147	rs367778601	G	A	A	4568	0.656293	0.244415	0.084873	NA
CAD	Overall	UKB	MT-ND2	ND2	NADH dehydrogenase subunit 2	5147	rs367778601	G	A	A	337305	1.01474	0.0424903	0.730583	NA
CAD	noDM	UKB	MT-ND2	ND2	NADH dehydrogenase subunit 2	5147	rs367778601	G	A	A	305503	1.01999	0.0473876	0.676225	NA
CAD	DM	UKB	MT-ND2	ND2	NADH dehydrogenase subunit 2	5147	rs367778601	G	A	A	31802	0.989482	0.0956453	0.911974	NA
CAD	Overall	UKB	MT-ND2	ND2	NADH dehydrogenase subunit 2	5390	rs41333444	A	G	G	337457	0.931641	0.094998	0.456056	NA
CAD	noDM	UKB	MT-ND2	ND2	NADH dehydrogenase subunit 2	5390	rs41333444	A	G	G	305639	0.933315	0.106986	0.518889	NA
CAD	DM	UKB	MT-ND2	ND2	NADH dehydrogenase subunit 2	5390	rs41333444	A	G	G	31818	0.927798	0.205974	0.71598	NA
CAD	Overall	UKB	MT-ND2	ND2	NADH dehydrogenase subunit 2	5495	rs3020602	T	C	C	337089	1.0504	0.0773751	0.525088	NA
CAD	noDM	UKB	MT-ND2	ND2	NADH dehydrogenase subunit 2	5495	rs3020602	T	C	C	305298	1.09099	0.0850461	0.305831	NA
CAD	DM	UKB	MT-ND2	ND2	NADH dehydrogenase subunit 2	5495	rs3020602	T	C	C	31791	0.893874	0.18415	0.542368	NA
CAD	Overall	BiLEVE	MT-NC4	NC4	non-coding nucleotides	5656	-	A	G	G	40798	0.826319	0.229706	0.406247	NA
CAD	noDM	BiLEVE	MT-NC4	NC4	non-coding nucleotides	5656	-	A	G	G	36227	1.03686	0.246507	0.883252	NA
CAD	DM	BiLEVE	MT-NC4	NC4	non-coding nucleotides	5656	-	A	G	G	4571	0.351332	0.601855	0.0822105	NA
CAD	Overall	UKB	MT-NC4	NC4	non-coding nucleotides	5656	-	A	G	G	337386	0.771415	0.0990293	0.00877416	NA
CAD	noDM	UKB	MT-NC4	NC4	non-coding nucleotides	5656	-	A	G	G	305565	0.873807	0.106301	0.204441	NA
CAD	DM	UKB	MT-NC4	NC4	non-coding nucleotides	5656	-	A	G	G	31821	0.430931	0.267132	0.00162558	NA
CAD	Overall	UKB	MT-CO1	COI	Cytochrome c oxidase subunit I	5999	rs879118820	T	C	C	337228	0.971441	0.0708645	0.682635	NA
CAD	noDM	UKB	MT-CO1	COI	Cytochrome c oxidase subunit I	5999	rs879118820	T	C	C	305425	0.931512	0.0808553	0.380245	NA
CAD	DM	UKB	MT-CO1	COI	Cytochrome c oxidase subunit I	5999	rs879118820	T	C	C	31803	1.13451	0.148132	0.394237	NA
CAD	Overall	UKB	MT-CO1	COI	Cytochrome c oxidase subunit I	6047	rs879104796	A	G	G	337377	0.999233	0.0698477	0.991237	NA
CAD	noDM	UKB	MT-CO1	COI	Cytochrome c oxidase subunit I	6047	rs879104796	A	G	G	305567	0.962326	0.079312	0.628255	NA
CAD	DM	UKB	MT-CO1	COI	Cytochrome c oxidase subunit I	6047	rs879104796	A	G	G	31810	1.15196	0.148287	0.340073	NA
CAD	Overall	UKB	MT-CO1	COI	Cytochrome c oxidase subunit I	6221	rs370472320	T	C	C	337230	0.899653	0.0864031	0.221002	NA
CAD	noDM	UKB	MT-CO1	COI	Cytochrome c oxidase subunit I	6221	rs370472320	T	C	C	305430	0.894051	0.0967255	0.24693	NA
CAD	DM	UKB	MT-CO1	COI	Cytochrome c oxidase subunit I	6221	rs370472320	T	C	C	31800	0.933591	0.192019	0.720444	NA
CAD	Overall	BiLEVE	MT-CO1	COI	Cytochrome c oxidase subunit I	6371	rs878870695	C	T	T	40763	0.693893	0.245295	0.13628	NA
CAD	noDM	BiLEVE	MT-CO1	COI	Cytochrome c oxidase subunit I	6371	rs878870695	C	T	T	36193	0.635578	0.28625	0.113352	NA
CAD	DM	BiLEVE	MT-CO1	COI	Cytochrome c oxidase subunit I	6371	rs878870695	C	T	T	4570	0.95013	0.483189	0.915683	NA
CAD	Overall	UKB	MT-CO1	COI	Cytochrome c oxidase subunit I	6371	rs878870695	C	T	T	337010	0.91089	0.0898236	0.298771	NA
CAD	noDM	UKB	MT-CO1	COI	Cytochrome c oxidase subunit I	6371	rs878870695	C	T	T	305229	0.9029	0.1007	0.31042	NA
CAD	DM	UKB	MT-CO1	COI	Cytochrome c oxidase subunit I	6371	rs878870695	C	T	T	31781	0.953498	0.198644	0.81055	NA
CAD	Overall	BiLEVE	MT-CO1	COI	Cytochrome c oxidase subunit I	6734	-	G	A	A	40656	0.640575	0.299063	0.136413	NA
CAD	noDM	BiLEVE	MT-CO1	COI	Cytochrome c oxidase subunit I	6734	-	G	A	A	36101	0.737182	0.326756	0.350729	NA
CAD	DM	BiLEVE	MT-CO1	COI	Cytochrome c oxidase subunit I	6734	-	G	A	A	4555	0.356139	0.73261	0.158759	NA
CAD	Overall	UKB	MT-CO1	COI	Cytochrome c oxidase subunit I	6734	-	G	A	A	336617	1.09014	0.0938524	0.357807	NA
CAD	noDM	UKB	MT-CO1	COI	Cytochrome c oxidase subunit I	6734	-	G	A	A	304888	1.05895	0.108006	0.595872	NA
CAD	DM	UKB	MT-CO1	COI	Cytochrome c oxidase subunit I	6734	-	G	A	A	31729	1.20882	0.190509	0.319509	NA
CAD	Overall	BiLEVE	MT-CO1	COI	Cytochrome c oxidase subunit I	6776	-	T	C	C	40783	1.08489	0.106471	0.444095	NA
CAD	noDM	BiLEVE	MT-CO1	COI	Cytochrome c oxidase subunit I	6776	-	T	C	C	36212	1.13435	0.119051	0.289673	NA
CAD	DM	BiLEVE	MT-CO1	COI	Cytochrome c oxidase subunit I	6776	-	T	C	C	4571	0.910389	0.235936	0.690692	NA
CAD	Overall	UKB	MT-CO1	COI	Cytochrome c oxidase subunit I	6776	-	T	C	C	337169	1.05868	0.0432602	0.187455	NA
CAD	noDM	UKB	MT-CO1	COI	Cytochrome c oxidase subunit I	6776	-	T	C	C	305370	1.07036	0.0482421	0.158674	NA
CAD	DM	UKB	MT-CO1	COI	Cytochrome c oxidase subunit I	6776	-	T	C	C	31799	1.01292	0.0972698	0.894997	NA
CAD	Overall	BiLEVE	MT-CO1	COI	Cytochrome c oxidase subunit I	7028	-	T	C	C	40786	1.02515	0.0494351	0.615347	NA
CAD	noDM	BiLEVE	MT-CO1	COI	Cytochrome c oxidase subunit I	7028	-	T	C	C	36217	1.08192	0.0564263	0.162898	NA
CAD	DM	BiLEVE	MT-CO1	COI	Cytochrome c oxidase subunit I	7028	-	T	C	C	4569	0.85905	0.102925	0.139915	NA
CAD	Overall	UKB	MT-CO1	COI	Cytochrome c oxidase subunit I	7028	-	T	C	C	337230	0.986113	0.0200904	0.486395	NA
CAD	noDM	UKB	MT-CO1	COI	Cytochrome c oxidase subunit I	7028	-	T	C	C	305425	0.989657	0.0225053	0.6441	NA
CAD	DM	UKB	MT-CO1	COI	Cytochrome c oxidase subunit I	7028	-	T	C	C	31805	0.972176	0.044473	0.525743	NA
CAD	Overall	BiLEVE	MT-TS1	S(UCN)	tRNA serine 1	7476	rs201950015	C	T	T	40799	0.981283	0.179238	0.916046	NA
CAD	noDM	BiLEVE	MT-TS1	S(UCN)	tRNA serine 1	7476	rs201950015	C	T	T	36225	0.9408	0.209278	0.770595	NA
CAD	DM	BiLEVE	MT-TS1	S(UCN)	tRNA serine 1	7476	rs201950015	C	T	T	4574	1.14445	0.350732	0.700463	NA
CAD	Overall	UKB	MT-TS1	S(UCN)	tRNA serine 1	7476	rs201950015	C	T	T	337458	1.07001	0.0716622	0.345046	NA
CAD	noDM	UKB	MT-TS1	S(UCN)	tRNA serine 1	7476	rs201950015	C	T	T	305637	1.10657	0.0793975	0.202163	NA
CAD	DM	UKB	MT-TS1	S(UCN)	tRNA serine 1	7476	rs201950015	C	T	T	31821	0.943174	0.164616	0.722288	NA
CAD	Overall	BiLEVE	MT-CO2	COII	Cytochrome c oxidase subunit II	7768	rs41534044	A	G	G	40810	0.880416	0.126739	0.314943	NA
CAD	noDM	BiLEVE	MT-CO2	COII	Cytochrome c oxidase subunit II	7768	rs41534044	A	G	G	36236	0.957182	0.140669	0.755724	NA
CAD	DM	BiLEVE	MT-CO2	COII	Cytochrome c oxidase subunit II	7768	rs41534044	A	G	G	4574	0.642658	0.287952	0.124668	NA
CAD	Overall	UKB	MT-CO2	COII	Cytochrome c oxidase subunit II	7768	rs41534044	A	G	G	337456	0.907275	0.0518905	0.0607517	NA
CAD	noDM	UKB	MT-CO2	COII	Cytochrome c oxidase subunit II	7768	rs41534044	A	G	G	305633	0.88861	0.058707	0.0442595	NA
CAD	DM	UKB	MT-CO2	COII	Cytochrome c oxidase subunit II	7768	rs41534044	A	G	G	31823	0.976751	0.111154	0.832394	NA
CAD	Overall	BiLEVE	MT-CO2	COII	Cytochrome c oxidase subunit II	8251	rs3021089	G	A	A	40781	0.921003	0.108466	0.448041	NA
CAD	noDM	BiLEVE	MT-CO2	COII	Cytochrome c oxidase subunit II	8251	rs3021089	G	A	A	36208	0.755177	0.134194	0.036392	NA
CAD	DM	BiLEVE	MT-CO2	COII	Cytochrome c oxidase subunit II	8251	rs3021089	G	A	A	4573	1.48513	0.193225	0.0406708	NA
CAD	Overall	BiLEVE	MT-CO2	COII	Cytochrome c oxidase subunit II	8269	-	G	A	A	40772	1.16992	0.129823	0.226714	NA
CAD	noDM	BiLEVE	MT-CO2	COII	Cytochrome c oxidase subunit II	8269	-	G	A	A	36202	1.19899	0.145406	0.211999	NA
CAD	DM	BiLEVE	MT-CO2	COII	Cytochrome c oxidase subunit II	8269	-	G	A	A	4570	1.03673	0.287101	0.900016	NA
CAD	Overall	UKB	MT-CO2	COII	Cytochrome c oxidase subunit II	8269	-	G	A	A	336839	1.02396	0.0555829	0.67017	NA
CAD	noDM	UKB	MT-CO2	COII	Cytochrome c oxidase subunit II	8269	-	G	A	A	305080	1.01932	0.0627361	0.760349	NA
CAD	DM	UKB	MT-CO2	COII	Cytochrome c oxidase subunit II	8269	-	G	A	A	31759	1.04817	0.11982	0.694575	NA
CAD	Overall	UKB	MT-ATP8	ATPase8	ATP synthase F0 subunit 8	8448	rs879056797	T	C	C	337505	0.916214	0.0932462	0.348021	NA
CAD	noDM	UKB	MT-ATP8	ATPase8	ATP synthase F0 subunit 8	8448	rs879056797	T	C	C	305677	0.940799	0.102289	0.550775	NA
CAD	DM	UKB	MT-ATP8	ATPase8	ATP synthase F0 subunit 8	8448	rs879056797	T	C	C	31828	0.811424	0.225372	0.353823	NA
CAD	Overall	BiLEVE	MT-ATP6	ATPase6	ATP synthase F0 subunit 6	8697	rs879233543	G	A	A	40749	0.901299	0.0842837	0.217591	NA
CAD	noDM	BiLEVE	MT-ATP6	ATPase6	ATP synthase F0 subunit 6	8697	rs879233543	G	A	A	36182	0.951078	0.0954354	0.59918	NA
CAD	DM	BiLEVE	MT-ATP6	ATPase6	ATP synthase F0 subunit 6	8697	rs879233543	G	A	A	4567	0.755338	0.178166	0.115283	NA
CAD	Overall	UKB	MT-ATP6	ATPase6	ATP synthase F0 subunit 6	8697	rs879233543	G	A	A	337133	0.989387	0.0334648	0.749848	NA
CAD	noDM	UKB	MT-ATP6	ATPase6	ATP synthase F0 subunit 6	8697	rs879233543	G	A	A	305344	0.983113	0.0375681	0.650304	NA
CAD	DM	UKB	MT-ATP6	ATPase6	ATP synthase F0 subunit 6	8697	rs879233543	G	A	A	31789	1.01148	0.0735585	0.876693	NA
CAD	Overall	BiLEVE	MT-ATP6	ATPase6	ATP synthase F0 subunit 6	8994	rs28358887,COSM6716156,COSM6716157	G	A	A	40634	1.00366	0.163051	0.982126	NA
CAD	noDM	BiLEVE	MT-ATP6	ATPase6	ATP synthase F0 subunit 6	8994	rs28358887,COSM6716156,COSM6716157	G	A	A	36080	0.701977	0.221449	0.110064	NA
CAD	DM	BiLEVE	MT-ATP6	ATPase6	ATP synthase F0 subunit 6	8994	rs28358887,COSM6716156,COSM6716157	G	A	A	4554	1.94011	0.25975	0.0107271	NA
CAD	Overall	UKB	MT-ATP6	ATPase6	ATP synthase F0 subunit 6	8994	rs28358887,COSM6716156,COSM6716157	G	A	A	337449	1.03153	0.0656954	0.636507	NA
CAD	noDM	UKB	MT-ATP6	ATPase6	ATP synthase F0 subunit 6	8994	rs28358887,COSM6716156,COSM6716157	G	A	A	305633	1.03799	0.073017	0.609591	NA
CAD	DM	UKB	MT-ATP6	ATPase6	ATP synthase F0 subunit 6	8994	rs28358887,COSM6716156,COSM6716157	G	A	A	31816	0.999816	0.149873	0.999021	NA
CAD	Overall	BiLEVE	MT-ATP6	ATPase6	ATP synthase F0 subunit 6	9055	rs193303045	G	A	A	40768	0.936542	0.0880817	0.456681	NA
CAD	noDM	BiLEVE	MT-ATP6	ATPase6	ATP synthase F0 subunit 6	9055	rs193303045	G	A	A	36198	0.949649	0.0999237	0.60514	NA
CAD	DM	BiLEVE	MT-ATP6	ATPase6	ATP synthase F0 subunit 6	9055	rs193303045	G	A	A	4570	0.897172	0.18631	0.560295	NA
CAD	Overall	UKB	MT-ATP6	ATPase6	ATP synthase F0 subunit 6	9055	rs193303045	G	A	A	336876	0.972389	0.0353035	0.427711	NA
CAD	noDM	UKB	MT-ATP6	ATPase6	ATP synthase F0 subunit 6	9055	rs193303045	G	A	A	305120	0.961436	0.0396548	0.321325	NA
CAD	DM	UKB	MT-ATP6	ATPase6	ATP synthase F0 subunit 6	9055	rs193303045	G	A	A	31756	1.01522	0.0775247	0.845508	NA
CAD	Overall	UKB	MT-ATP6	ATPase6	ATP synthase F0 subunit 6	9123	COSM1155692,COSM1155693	G	A	A	337244	0.857547	0.0758803	0.0428377	NA
CAD	noDM	UKB	MT-ATP6	ATPase6	ATP synthase F0 subunit 6	9123	COSM1155692,COSM1155693	G	A	A	305437	0.835676	0.0864009	0.0377378	NA
CAD	DM	UKB	MT-ATP6	ATPase6	ATP synthase F0 subunit 6	9123	COSM1155692,COSM1155693	G	A	A	31807	0.945771	0.159316	0.726364	NA
CAD	Overall	BiLEVE	MT-CO3	COIII	Cytochrome c oxidase subunit III	9477	rs2853825	G	A	A	40788	0.946418	0.0865954	0.524806	NA
CAD	noDM	BiLEVE	MT-CO3	COIII	Cytochrome c oxidase subunit III	9477	rs2853825	G	A	A	36218	0.979732	0.0981865	0.834807	NA
CAD	DM	BiLEVE	MT-CO3	COIII	Cytochrome c oxidase subunit III	9477	rs2853825	G	A	A	4570	0.845965	0.18235	0.358964	NA
CAD	Overall	UKB	MT-CO3	COIII	Cytochrome c oxidase subunit III	9667	rs41482146	A	G	G	337214	1.05325	0.0883185	0.556953	NA
CAD	noDM	UKB	MT-CO3	COIII	Cytochrome c oxidase subunit III	9667	rs41482146	A	G	G	305406	1.06388	0.0984204	0.529255	NA
CAD	DM	UKB	MT-CO3	COIII	Cytochrome c oxidase subunit III	9667	rs41482146	A	G	G	31808	1.01777	0.199254	0.929572	NA
CAD	Overall	BiLEVE	MT-CO3	COIII	Cytochrome c oxidase subunit III	9698	-	T	C	C	40675	0.991466	0.0889822	0.923269	NA
CAD	noDM	BiLEVE	MT-CO3	COIII	Cytochrome c oxidase subunit III	9698	-	T	C	C	36116	1.01464	0.100137	0.88459	NA
CAD	DM	BiLEVE	MT-CO3	COIII	Cytochrome c oxidase subunit III	9698	-	T	C	C	4559	0.919189	0.193192	0.662718	NA
CAD	Overall	UKB	MT-CO3	COIII	Cytochrome c oxidase subunit III	9698	-	T	C	C	336470	0.960645	0.0362603	0.268175	NA
CAD	noDM	UKB	MT-CO3	COIII	Cytochrome c oxidase subunit III	9698	-	T	C	C	304755	0.942501	0.0408816	0.147467	NA
CAD	DM	UKB	MT-CO3	COIII	Cytochrome c oxidase subunit III	9698	-	T	C	C	31715	1.03311	0.0786541	0.678769	NA
CAD	Overall	BiLEVE	MT-CO3	COIII	Cytochrome c oxidase subunit III	9716	rs41502750	T	C	C	40807	0.622861	0.23914	0.0477345	NA
CAD	noDM	BiLEVE	MT-CO3	COIII	Cytochrome c oxidase subunit III	9716	rs41502750	T	C	C	36232	0.653889	0.275738	0.1234	NA
CAD	DM	BiLEVE	MT-CO3	COIII	Cytochrome c oxidase subunit III	9716	rs41502750	T	C	C	4575	0.553613	0.47612	0.214276	NA
CAD	Overall	UKB	MT-CO3	COIII	Cytochrome c oxidase subunit III	9716	rs41502750	T	C	C	337430	0.848693	0.0868186	0.058804	NA
CAD	noDM	UKB	MT-CO3	COIII	Cytochrome c oxidase subunit III	9716	rs41502750	T	C	C	305610	0.90829	0.0943625	0.30802	NA
CAD	DM	UKB	MT-CO3	COIII	Cytochrome c oxidase subunit III	9716	rs41502750	T	C	C	31820	0.620033	0.218551	0.0287385	NA
CAD	Overall	UKB	MT-CO3	COIII	Cytochrome c oxidase subunit III	9899	rs41345446	T	C	C	337369	0.880493	0.0801921	0.11249	NA
CAD	noDM	UKB	MT-CO3	COIII	Cytochrome c oxidase subunit III	9899	rs41345446	T	C	C	305560	0.871256	0.0909639	0.129748	NA
CAD	DM	UKB	MT-CO3	COIII	Cytochrome c oxidase subunit III	9899	rs41345446	T	C	C	31809	0.913777	0.170007	0.595847	NA
CAD	Overall	BiLEVE	MT-ND3	ND3	NADH dehydrogenase subunit 3	10238	-	T	C	C	40689	0.876856	0.141993	0.354713	NA
CAD	noDM	BiLEVE	MT-ND3	ND3	NADH dehydrogenase subunit 3	10238	-	T	C	C	36133	0.774966	0.169903	0.133491	NA
CAD	DM	BiLEVE	MT-ND3	ND3	NADH dehydrogenase subunit 3	10238	-	T	C	C	4556	1.21387	0.266691	0.467396	NA
CAD	Overall	UKB	MT-ND3	ND3	NADH dehydrogenase subunit 3	10238	-	T	C	C	336960	1.09314	0.0522725	0.0884564	NA
CAD	noDM	UKB	MT-ND3	ND3	NADH dehydrogenase subunit 3	10238	-	T	C	C	305178	1.05322	0.0595403	0.383802	NA
CAD	DM	UKB	MT-ND3	ND3	NADH dehydrogenase subunit 3	10238	-	T	C	C	31782	1.25491	0.109908	0.0388316	NA
CAD	Overall	BiLEVE	MT-ND3	ND3	NADH dehydrogenase subunit 3	10398	rs2853826	A	G	G	40645	1.006	0.0601775	0.920839	NA
CAD	noDM	BiLEVE	MT-ND3	ND3	NADH dehydrogenase subunit 3	10398	rs2853826	A	G	G	36094	0.962534	0.0693941	0.582131	NA
CAD	DM	BiLEVE	MT-ND3	ND3	NADH dehydrogenase subunit 3	10398	rs2853826	A	G	G	4551	1.15847	0.121777	0.227076	NA
CAD	Overall	UKB	MT-ND3	ND3	NADH dehydrogenase subunit 3	10398	rs2853826	A	G	G	336006	1.07177	0.0241139	0.00404736	NA
CAD	noDM	UKB	MT-ND3	ND3	NADH dehydrogenase subunit 3	10398	rs2853826	A	G	G	304331	1.05491	0.0271428	0.0488869	NA
CAD	DM	UKB	MT-ND3	ND3	NADH dehydrogenase subunit 3	10398	rs2853826	A	G	G	31675	1.13983	0.0525504	0.0127532	NA
CAD	Overall	UKB	MT-ND3	ND3	NADH dehydrogenase subunit 3	10400	rs28358278	C	T	T	337356	0.688915	0.309294	0.228281	NA
CAD	noDM	UKB	MT-ND3	ND3	NADH dehydrogenase subunit 3	10400	rs28358278	C	T	T	305538	0.54366	0.384432	0.112904	NA
CAD	DM	UKB	MT-ND3	ND3	NADH dehydrogenase subunit 3	10400	rs28358278	C	T	T	31818	1.32386	0.538058	0.602073	NA
CAD	Overall	BiLEVE	MT-TR	R	tRNA arginine	10463	rs28358279	T	C	C	40696	0.919246	0.0812122	0.299826	NA
CAD	noDM	BiLEVE	MT-TR	R	tRNA arginine	10463	rs28358279	T	C	C	36131	0.931132	0.0929034	0.44246	NA
CAD	DM	BiLEVE	MT-TR	R	tRNA arginine	10463	rs28358279	T	C	C	4565	0.876383	0.167012	0.429483	NA
CAD	Overall	UKB	MT-TR	R	tRNA arginine	10463	rs28358279	T	C	C	336616	0.985211	0.0325823	0.647461	NA
CAD	noDM	UKB	MT-TR	R	tRNA arginine	10463	rs28358279	T	C	C	304863	0.979163	0.0365839	0.564886	NA
CAD	DM	UKB	MT-TR	R	tRNA arginine	10463	rs28358279	T	C	C	31753	1.00593	0.0715734	0.934127	NA
CAD	Overall	BiLEVE	MT-ND4L	ND4L	NADH dehydrogenase subunit 4L	10550	rs28358280	A	G	G	40799	0.942444	0.0902217	0.511156	NA
CAD	noDM	BiLEVE	MT-ND4L	ND4L	NADH dehydrogenase subunit 4L	10550	rs28358280	A	G	G	36225	0.961565	0.101952	0.700658	NA
CAD	DM	BiLEVE	MT-ND4L	ND4L	NADH dehydrogenase subunit 4L	10550	rs28358280	A	G	G	4574	0.888061	0.193082	0.53866	NA
CAD	Overall	UKB	MT-ND4L	ND4L	NADH dehydrogenase subunit 4L	10550	rs28358280	A	G	G	337411	0.969391	0.0361377	0.389652	NA
CAD	noDM	UKB	MT-ND4L	ND4L	NADH dehydrogenase subunit 4L	10550	rs28358280	A	G	G	305604	0.96022	0.0405803	0.317159	NA
CAD	DM	UKB	MT-ND4L	ND4L	NADH dehydrogenase subunit 4L	10550	rs28358280	A	G	G	31807	1.00521	0.0794151	0.947793	NA
CAD	Overall	UKB	MT-ND4	ND4	NADH dehydrogenase subunit 4	10819	rs28358283	A	G	G	337397	0.956043	0.118135	0.70356	NA
CAD	noDM	UKB	MT-ND4	ND4	NADH dehydrogenase subunit 4	10819	rs28358283	A	G	G	305569	0.93029	0.134614	0.591413	NA
CAD	DM	UKB	MT-ND4	ND4	NADH dehydrogenase subunit 4	10819	rs28358283	A	G	G	31828	1.05669	0.247396	0.823627	NA
CAD	Overall	UKB	MT-ND4	ND4	NADH dehydrogenase subunit 4	10873	rs2857284	T	C	C	337211	0.89232	0.168584	0.499163	NA
CAD	noDM	UKB	MT-ND4	ND4	NADH dehydrogenase subunit 4	10873	rs2857284	T	C	C	305407	0.653618	0.218157	0.0512712	NA
CAD	DM	UKB	MT-ND4	ND4	NADH dehydrogenase subunit 4	10873	rs2857284	T	C	C	31804	1.90743	0.281328	0.021711	NA
CAD	Overall	UKB	MT-ND4	ND4	NADH dehydrogenase subunit 4	10915	rs2857285	T	C	C	337274	1.06597	0.0885856	0.470778	NA
CAD	noDM	UKB	MT-ND4	ND4	NADH dehydrogenase subunit 4	10915	rs2857285	T	C	C	305467	1.05965	0.100301	0.56348	NA
CAD	DM	UKB	MT-ND4	ND4	NADH dehydrogenase subunit 4	10915	rs2857285	T	C	C	31807	1.09688	0.188712	0.624115	NA
CAD	Overall	BiLEVE	MT-ND4	ND4	NADH dehydrogenase subunit 4	11251	rs869096886,COSM1138232	A	G	G	40705	0.979289	0.0602363	0.728259	NA
CAD	noDM	BiLEVE	MT-ND4	ND4	NADH dehydrogenase subunit 4	11251	rs869096886,COSM1138232	A	G	G	36143	0.970376	0.0693288	0.664469	NA
CAD	DM	BiLEVE	MT-ND4	ND4	NADH dehydrogenase subunit 4	11251	rs869096886,COSM1138232	A	G	G	4562	1.00841	0.122111	0.94531	NA
CAD	Overall	UKB	MT-ND4	ND4	NADH dehydrogenase subunit 4	11251	rs869096886,COSM1138232	A	G	G	336632	1.05464	0.0242385	0.0281729	NA
CAD	noDM	UKB	MT-ND4	ND4	NADH dehydrogenase subunit 4	11251	rs869096886,COSM1138232	A	G	G	304881	1.0573	0.027168	0.0402626	NA
CAD	DM	UKB	MT-ND4	ND4	NADH dehydrogenase subunit 4	11251	rs869096886,COSM1138232	A	G	G	31751	1.04389	0.0535182	0.422161	NA
CAD	Overall	BiLEVE	MT-ND4	ND4	NADH dehydrogenase subunit 4	11299	rs28358285	T	C	C	40799	0.91643	0.0909777	0.337439	NA
CAD	noDM	BiLEVE	MT-ND4	ND4	NADH dehydrogenase subunit 4	11299	rs28358285	T	C	C	36230	0.947185	0.102303	0.59584	NA
CAD	DM	BiLEVE	MT-ND4	ND4	NADH dehydrogenase subunit 4	11299	rs28358285	T	C	C	4569	0.821061	0.197813	0.318917	NA
CAD	Overall	UKB	MT-ND4	ND4	NADH dehydrogenase subunit 4	11299	rs28358285	T	C	C	337396	0.964296	0.0361131	0.314057	NA
CAD	noDM	UKB	MT-ND4	ND4	NADH dehydrogenase subunit 4	11299	rs28358285	T	C	C	305583	0.952603	0.0405976	0.231673	NA
CAD	DM	UKB	MT-ND4	ND4	NADH dehydrogenase subunit 4	11299	rs28358285	T	C	C	31813	1.01022	0.0790707	0.897658	NA
CAD	Overall	UKB	MT-ND4	ND4	NADH dehydrogenase subunit 4	11332	rs55714831	C	T	T	337419	1.00411	0.06956	0.953022	NA
CAD	noDM	UKB	MT-ND4	ND4	NADH dehydrogenase subunit 4	11332	rs55714831	C	T	T	305606	0.962875	0.0790922	0.632418	NA
CAD	DM	UKB	MT-ND4	ND4	NADH dehydrogenase subunit 4	11332	rs55714831	C	T	T	31813	1.17544	0.147145	0.271972	NA
CAD	Overall	BiLEVE	MT-ND4	ND4	NADH dehydrogenase subunit 4	11377	rs193302938	G	A	A	40757	0.761741	0.209247	0.193391	NA
CAD	noDM	BiLEVE	MT-ND4	ND4	NADH dehydrogenase subunit 4	11377	rs193302938	G	A	A	36195	0.809995	0.23236	0.364458	NA
CAD	DM	BiLEVE	MT-ND4	ND4	NADH dehydrogenase subunit 4	11377	rs193302938	G	A	A	4562	0.622161	0.474735	0.317493	NA
CAD	Overall	UKB	MT-ND4	ND4	NADH dehydrogenase subunit 4	11377	rs193302938	G	A	A	336817	0.930397	0.0778845	0.354292	NA
CAD	noDM	UKB	MT-ND4	ND4	NADH dehydrogenase subunit 4	11377	rs193302938	G	A	A	305045	0.968429	0.0856378	0.707956	NA
CAD	DM	UKB	MT-ND4	ND4	NADH dehydrogenase subunit 4	11377	rs193302938	G	A	A	31772	0.783356	0.185258	0.187506	NA
CAD	Overall	BiLEVE	MT-ND4	ND4	NADH dehydrogenase subunit 4	11467	rs2853493,COSM6716752,COSM6716753	A	G	G	40718	0.984956	0.0593326	0.798346	NA
CAD	noDM	BiLEVE	MT-ND4	ND4	NADH dehydrogenase subunit 4	11467	rs2853493,COSM6716752,COSM6716753	A	G	G	36154	1.00453	0.067531	0.946685	NA
CAD	DM	BiLEVE	MT-ND4	ND4	NADH dehydrogenase subunit 4	11467	rs2853493,COSM6716752,COSM6716753	A	G	G	4564	0.931013	0.123909	0.564013	NA
CAD	Overall	UKB	MT-ND4	ND4	NADH dehydrogenase subunit 4	11467	rs2853493,COSM6716752,COSM6716753	A	G	G	336759	0.944659	0.0242818	0.0190468	NA
CAD	noDM	UKB	MT-ND4	ND4	NADH dehydrogenase subunit 4	11467	rs2853493,COSM6716752,COSM6716753	A	G	G	305002	0.933902	0.0272891	0.0122143	NA
CAD	DM	UKB	MT-ND4	ND4	NADH dehydrogenase subunit 4	11467	rs2853493,COSM6716752,COSM6716753	A	G	G	31757	0.987113	0.0531673	0.807259	NA
CAD	Overall	BiLEVE	MT-ND4	ND4	NADH dehydrogenase subunit 4	11485	-	T	C	C	40772	1.17447	0.163103	0.324149	NA
CAD	noDM	BiLEVE	MT-ND4	ND4	NADH dehydrogenase subunit 4	11485	-	T	C	C	36199	1.0756	0.1925	0.705006	NA
CAD	DM	BiLEVE	MT-ND4	ND4	NADH dehydrogenase subunit 4	11485	-	T	C	C	4573	1.51239	0.312941	0.186187	NA
CAD	Overall	BiLEVE	MT-ND4	ND4	NADH dehydrogenase subunit 4	11674	rs28358286	C	T	T	40792	1.03844	0.17115	0.825589	NA
CAD	noDM	BiLEVE	MT-ND4	ND4	NADH dehydrogenase subunit 4	11674	rs28358286	C	T	T	36221	0.701745	0.232112	0.127028	NA
CAD	DM	BiLEVE	MT-ND4	ND4	NADH dehydrogenase subunit 4	11674	rs28358286	C	T	T	4571	2.24191	0.277519	0.0036248	NA
CAD	Overall	UKB	MT-ND4	ND4	NADH dehydrogenase subunit 4	11674	rs28358286	C	T	T	337501	1.03979	0.0692215	0.573006	NA
CAD	noDM	UKB	MT-ND4	ND4	NADH dehydrogenase subunit 4	11674	rs28358286	C	T	T	305671	1.03342	0.0771741	0.670134	NA
CAD	DM	UKB	MT-ND4	ND4	NADH dehydrogenase subunit 4	11674	rs28358286	C	T	T	31830	1.05757	0.156333	0.720307	NA
CAD	Overall	BiLEVE	MT-ND4	ND4	NADH dehydrogenase subunit 4	11719	rs2853495	A	G	G	40767	1.06336	0.0490867	0.21074	NA
CAD	noDM	BiLEVE	MT-ND4	ND4	NADH dehydrogenase subunit 4	11719	rs2853495	A	G	G	36199	1.09578	0.0561949	0.103599	NA
CAD	DM	BiLEVE	MT-ND4	ND4	NADH dehydrogenase subunit 4	11719	rs2853495	A	G	G	4568	0.963216	0.101056	0.71074	NA
CAD	Overall	BiLEVE	MT-ND4	ND4	NADH dehydrogenase subunit 4	11812	rs3088053	A	G	G	40773	0.911236	0.0928421	0.31673	NA
CAD	noDM	BiLEVE	MT-ND4	ND4	NADH dehydrogenase subunit 4	11812	rs3088053	A	G	G	36202	0.95904	0.104981	0.690346	NA
CAD	DM	BiLEVE	MT-ND4	ND4	NADH dehydrogenase subunit 4	11812	rs3088053	A	G	G	4571	0.758174	0.197399	0.16078	NA
CAD	Overall	UKB	MT-ND4	ND4	NADH dehydrogenase subunit 4	11812	rs3088053	A	G	G	337272	1.01841	0.0364738	0.617	NA
CAD	noDM	UKB	MT-ND4	ND4	NADH dehydrogenase subunit 4	11812	rs3088053	A	G	G	305467	1.00807	0.0409341	0.844411	NA
CAD	DM	UKB	MT-ND4	ND4	NADH dehydrogenase subunit 4	11812	rs3088053	A	G	G	31805	1.05608	0.0803171	0.496877	NA
CAD	Overall	UKB	MT-ND4	ND4	NADH dehydrogenase subunit 4	11914	rs2853496,COSM1155517	G	A	A	336654	0.948664	0.077087	0.494193	NA
CAD	noDM	UKB	MT-ND4	ND4	NADH dehydrogenase subunit 4	11914	rs2853496,COSM1155517	G	A	A	304913	0.953338	0.0858624	0.577843	NA
CAD	DM	UKB	MT-ND4	ND4	NADH dehydrogenase subunit 4	11914	rs2853496,COSM1155517	G	A	A	31741	0.923914	0.174467	0.650123	NA
CAD	Overall	UKB	MT-ND4	ND4	NADH dehydrogenase subunit 4	11947	rs28359168	A	G	G	337396	1.02341	0.0710066	0.74451	NA
CAD	noDM	UKB	MT-ND4	ND4	NADH dehydrogenase subunit 4	11947	rs28359168	A	G	G	305577	1.02268	0.0790655	0.776727	NA
CAD	DM	UKB	MT-ND4	ND4	NADH dehydrogenase subunit 4	11947	rs28359168	A	G	G	31819	1.01815	0.160998	0.911044	NA
CAD	Overall	BiLEVE	MT-TL2	L(CUN)	tRNA leucine2	12308	rs2853498	A	G	G	40800	0.977523	0.0593123	0.701515	NA
CAD	noDM	BiLEVE	MT-TL2	L(CUN)	tRNA leucine2	12308	rs2853498	A	G	G	36226	0.993655	0.0675879	0.924967	NA
CAD	DM	BiLEVE	MT-TL2	L(CUN)	tRNA leucine2	12308	rs2853498	A	G	G	4574	0.93349	0.123415	0.57707	NA
CAD	Overall	BiLEVE	MT-ND5	ND5	NADH dehydrogenase subunit 5	12372	rs2853499	G	A	A	40778	0.983328	0.0591484	0.77623	NA
CAD	noDM	BiLEVE	MT-ND5	ND5	NADH dehydrogenase subunit 5	12372	rs2853499	G	A	A	36204	1.00096	0.0673441	0.988682	NA
CAD	DM	BiLEVE	MT-ND5	ND5	NADH dehydrogenase subunit 5	12372	rs2853499	G	A	A	4574	0.9347	0.123404	0.584227	NA
CAD	Overall	UKB	MT-ND5	ND5	NADH dehydrogenase subunit 5	12372	rs2853499	G	A	A	337175	0.951046	0.0241728	0.0378536	NA
CAD	noDM	UKB	MT-ND5	ND5	NADH dehydrogenase subunit 5	12372	rs2853499	G	A	A	305382	0.941182	0.0271489	0.0255613	NA
CAD	DM	UKB	MT-ND5	ND5	NADH dehydrogenase subunit 5	12372	rs2853499	G	A	A	31793	0.990287	0.053051	0.854023	NA
CAD	Overall	BiLEVE	MT-ND5	ND5	NADH dehydrogenase subunit 5	12501	rs28397767	G	A	A	40792	0.925494	0.136606	0.570855	NA
CAD	noDM	BiLEVE	MT-ND5	ND5	NADH dehydrogenase subunit 5	12501	rs28397767	G	A	A	36222	0.836605	0.16216	0.27126	NA
CAD	DM	BiLEVE	MT-ND5	ND5	NADH dehydrogenase subunit 5	12501	rs28397767	G	A	A	4570	1.21367	0.260402	0.457091	NA
CAD	Overall	UKB	MT-ND5	ND5	NADH dehydrogenase subunit 5	12501	rs28397767	G	A	A	337103	1.10305	0.0514022	0.0563735	NA
CAD	noDM	UKB	MT-ND5	ND5	NADH dehydrogenase subunit 5	12501	rs28397767	G	A	A	305314	1.06108	0.0585721	0.311467	NA
CAD	DM	UKB	MT-ND5	ND5	NADH dehydrogenase subunit 5	12501	rs28397767	G	A	A	31789	1.27251	0.107988	0.0256392	NA
CAD	Overall	BiLEVE	MT-ND5	ND5	NADH dehydrogenase subunit 5	12612	rs28359172	A	G	G	40733	1.05982	0.0756493	0.442497	NA
CAD	noDM	BiLEVE	MT-ND5	ND5	NADH dehydrogenase subunit 5	12612	rs28359172	A	G	G	36172	1.00242	0.088275	0.978191	NA
CAD	DM	BiLEVE	MT-ND5	ND5	NADH dehydrogenase subunit 5	12612	rs28359172	A	G	G	4561	1.25909	0.148954	0.121929	NA
CAD	Overall	UKB	MT-ND5	ND5	NADH dehydrogenase subunit 5	12612	rs28359172	A	G	G	336772	1.10223	0.030782	0.00156597	NA
CAD	noDM	UKB	MT-ND5	ND5	NADH dehydrogenase subunit 5	12612	rs28359172	A	G	G	305020	1.11856	0.0343875	0.00112138	NA
CAD	DM	UKB	MT-ND5	ND5	NADH dehydrogenase subunit 5	12612	rs28359172	A	G	G	31752	1.04195	0.0687153	0.549853	NA
CAD	Overall	BiLEVE	MT-ND5	ND5	NADH dehydrogenase subunit 5	12633	rs3926883	C	A	A	40702	0.877367	0.184735	0.478817	NA
CAD	noDM	BiLEVE	MT-ND5	ND5	NADH dehydrogenase subunit 5	12633	rs3926883	C	A	A	36145	0.882774	0.214086	0.560289	NA
CAD	DM	BiLEVE	MT-ND5	ND5	NADH dehydrogenase subunit 5	12633	rs3926883	C	A	A	4557	0.888857	0.36458	0.746571	NA
CAD	Overall	UKB	MT-ND5	ND5	NADH dehydrogenase subunit 5	12633	rs3926883	C	A	A	337317	0.886497	0.0765236	0.115397	NA
CAD	noDM	UKB	MT-ND5	ND5	NADH dehydrogenase subunit 5	12633	rs3926883	C	A	A	305495	0.896481	0.085973	0.203703	NA
CAD	DM	UKB	MT-ND5	ND5	NADH dehydrogenase subunit 5	12633	rs3926883	C	A	A	31822	0.850954	0.167226	0.334474	NA
CAD	Overall	BiLEVE	MT-ND5	ND5	NADH dehydrogenase subunit 5	12705	rs193302956,COSM1155526	C	T	T	40749	0.880459	0.0997186	0.201705	NA
CAD	noDM	BiLEVE	MT-ND5	ND5	NADH dehydrogenase subunit 5	12705	rs193302956,COSM1155526	C	T	T	36179	0.739378	0.121822	0.0131906	NA
CAD	DM	BiLEVE	MT-ND5	ND5	NADH dehydrogenase subunit 5	12705	rs193302956,COSM1155526	C	T	T	4570	1.37285	0.180759	0.0795835	NA
CAD	Overall	UKB	MT-ND5	ND5	NADH dehydrogenase subunit 5	12705	rs193302956,COSM1155526	C	T	T	337166	1.04092	0.0378004	0.288755	NA
CAD	noDM	UKB	MT-ND5	ND5	NADH dehydrogenase subunit 5	12705	rs193302956,COSM1155526	C	T	T	305376	1.01423	0.0427055	0.740747	NA
CAD	DM	UKB	MT-ND5	ND5	NADH dehydrogenase subunit 5	12705	rs193302956,COSM1155526	C	T	T	31790	1.1501	0.0814916	0.0861389	NA
CAD	Overall	UKB	MT-ND5	ND5	NADH dehydrogenase subunit 5	13020	rs75577869	T	C	C	337339	0.89464	0.0915334	0.223862	NA
CAD	noDM	UKB	MT-ND5	ND5	NADH dehydrogenase subunit 5	13020	rs75577869	T	C	C	305531	0.896994	0.102641	0.289557	NA
CAD	DM	UKB	MT-ND5	ND5	NADH dehydrogenase subunit 5	13020	rs75577869	T	C	C	31808	0.885509	0.201733	0.546682	NA
CAD	Overall	UKB	MT-ND5	ND5	NADH dehydrogenase subunit 5	13104	rs878871104	A	G	G	336322	1.05784	0.0987514	0.569099	NA
CAD	noDM	UKB	MT-ND5	ND5	NADH dehydrogenase subunit 5	13104	rs878871104	A	G	G	304616	1.06816	0.110978	0.552419	NA
CAD	DM	UKB	MT-ND5	ND5	NADH dehydrogenase subunit 5	13104	rs878871104	A	G	G	31706	1.0348	0.215405	0.873808	NA
CAD	Overall	BiLEVE	MT-ND5	ND5	NADH dehydrogenase subunit 5	13105	rs2853501,COSM6716789	A	G	G	40728	0.937104	0.240717	0.787263	NA
CAD	noDM	BiLEVE	MT-ND5	ND5	NADH dehydrogenase subunit 5	13105	rs2853501,COSM6716789	A	G	G	36166	0.98023	0.2694	0.940914	NA
CAD	DM	BiLEVE	MT-ND5	ND5	NADH dehydrogenase subunit 5	13105	rs2853501,COSM6716789	A	G	G	4562	0.849315	0.531472	0.758609	NA
CAD	Overall	UKB	MT-ND5	ND5	NADH dehydrogenase subunit 5	13105	rs2853501,COSM6716789	A	G	G	336780	1.00069	0.0916031	0.99397	NA
CAD	noDM	UKB	MT-ND5	ND5	NADH dehydrogenase subunit 5	13105	rs2853501,COSM6716789	A	G	G	305014	1.00247	0.10298	0.980883	NA
CAD	DM	UKB	MT-ND5	ND5	NADH dehydrogenase subunit 5	13105	rs2853501,COSM6716789	A	G	G	31766	1.00211	0.199912	0.991599	NA
CAD	Overall	BiLEVE	MT-ND5	ND5	NADH dehydrogenase subunit 5	13617	rs2853503	T	C	C	40772	0.960155	0.0859051	0.635989	NA
CAD	noDM	BiLEVE	MT-ND5	ND5	NADH dehydrogenase subunit 5	13617	rs2853503	T	C	C	36200	1.00176	0.0968629	0.985494	NA
CAD	DM	BiLEVE	MT-ND5	ND5	NADH dehydrogenase subunit 5	13617	rs2853503	T	C	C	4572	0.830709	0.18435	0.314362	NA
CAD	Overall	UKB	MT-ND5	ND5	NADH dehydrogenase subunit 5	13617	rs2853503	T	C	C	337159	0.971727	0.0347548	0.409242	NA
CAD	noDM	UKB	MT-ND5	ND5	NADH dehydrogenase subunit 5	13617	rs2853503	T	C	C	305370	0.982021	0.0387737	0.639841	NA
CAD	DM	UKB	MT-ND5	ND5	NADH dehydrogenase subunit 5	13617	rs2853503	T	C	C	31789	0.932266	0.0780645	0.368942	NA
CAD	Overall	BiLEVE	MT-ND5	ND5	NADH dehydrogenase subunit 5	13708	rs28359178	G	A	A	40672	0.988158	0.0727389	0.869906	NA
CAD	noDM	BiLEVE	MT-ND5	ND5	NADH dehydrogenase subunit 5	13708	rs28359178	G	A	A	36112	0.932577	0.0849364	0.411172	NA
CAD	DM	BiLEVE	MT-ND5	ND5	NADH dehydrogenase subunit 5	13708	rs28359178	G	A	A	4560	1.19009	0.142913	0.223329	NA
CAD	Overall	UKB	MT-ND5	ND5	NADH dehydrogenase subunit 5	13708	rs28359178	G	A	A	336254	1.07593	0.0292165	0.0122467	NA
CAD	noDM	UKB	MT-ND5	ND5	NADH dehydrogenase subunit 5	13708	rs28359178	G	A	A	304536	1.09185	0.0326527	0.00712341	NA
CAD	DM	UKB	MT-ND5	ND5	NADH dehydrogenase subunit 5	13708	rs28359178	G	A	A	31718	1.01869	0.0651104	0.77611	NA
CAD	Overall	UKB	MT-ND5	ND5	NADH dehydrogenase subunit 5	13759	rs386420024	G	A	A	336155	0.972815	0.0795923	0.729128	NA
CAD	noDM	UKB	MT-ND5	ND5	NADH dehydrogenase subunit 5	13759	rs386420024	G	A	A	304446	0.991392	0.087735	0.921504	NA
CAD	DM	UKB	MT-ND5	ND5	NADH dehydrogenase subunit 5	13759	rs386420024	G	A	A	31709	0.894865	0.188177	0.554983	NA
CAD	Overall	UKB	MT-ND5	ND5	NADH dehydrogenase subunit 5	13780	rs41358152	A	G	G	337248	1.11749	0.0526876	0.0350023	NA
CAD	noDM	UKB	MT-ND5	ND5	NADH dehydrogenase subunit 5	13780	rs41358152	A	G	G	305451	1.07421	0.0601285	0.233838	NA
CAD	DM	UKB	MT-ND5	ND5	NADH dehydrogenase subunit 5	13780	rs41358152	A	G	G	31797	1.29006	0.110151	0.0207668	NA
CAD	Overall	BiLEVE	MT-ND5	ND5	NADH dehydrogenase subunit 5	13879	rs879087566	T	C	C	40727	1.10986	0.188697	0.580695	NA
CAD	noDM	BiLEVE	MT-ND5	ND5	NADH dehydrogenase subunit 5	13879	rs879087566	T	C	C	36163	1.26376	0.204242	0.251732	NA
CAD	DM	BiLEVE	MT-ND5	ND5	NADH dehydrogenase subunit 5	13879	rs879087566	T	C	C	4564	0.619354	0.478219	0.316442	NA
CAD	Overall	UKB	MT-ND5	ND5	NADH dehydrogenase subunit 5	13879	rs879087566	T	C	C	336591	1.18449	0.0780442	0.0300461	NA
CAD	noDM	UKB	MT-ND5	ND5	NADH dehydrogenase subunit 5	13879	rs879087566	T	C	C	304838	1.19627	0.0876466	0.0408916	NA
CAD	DM	UKB	MT-ND5	ND5	NADH dehydrogenase subunit 5	13879	rs879087566	T	C	C	31753	1.14931	0.170705	0.414935	NA
CAD	Overall	BiLEVE	MT-ND5	ND5	NADH dehydrogenase subunit 5	13965	rs869156190	T	C	C	40706	1.16926	0.208915	0.454156	NA
CAD	noDM	BiLEVE	MT-ND5	ND5	NADH dehydrogenase subunit 5	13965	rs869156190	T	C	C	36142	1.18466	0.241544	0.482949	NA
CAD	DM	BiLEVE	MT-ND5	ND5	NADH dehydrogenase subunit 5	13965	rs869156190	T	C	C	4564	1.08952	0.41521	0.836414	NA
CAD	Overall	UKB	MT-ND5	ND5	NADH dehydrogenase subunit 5	13965	rs869156190	T	C	C	336847	1.11398	0.0873886	0.216764	NA
CAD	noDM	UKB	MT-ND5	ND5	NADH dehydrogenase subunit 5	13965	rs869156190	T	C	C	305084	1.07493	0.0989811	0.465408	NA
CAD	DM	UKB	MT-ND5	ND5	NADH dehydrogenase subunit 5	13965	rs869156190	T	C	C	31763	1.27236	0.187286	0.198396	NA
CAD	Overall	BiLEVE	MT-ND5	ND5	NADH dehydrogenase subunit 5	13966	rs41535848	A	G	G	40800	0.787516	0.205414	0.244877	NA
CAD	noDM	BiLEVE	MT-ND5	ND5	NADH dehydrogenase subunit 5	13966	rs41535848	A	G	G	36226	0.701967	0.24419	0.147295	NA
CAD	DM	BiLEVE	MT-ND5	ND5	NADH dehydrogenase subunit 5	13966	rs41535848	A	G	G	4574	1.11801	0.388263	0.773883	NA
CAD	Overall	UKB	MT-ND5	ND5	NADH dehydrogenase subunit 5	13966	rs41535848	A	G	G	337299	1.03564	0.0750882	0.640983	NA
CAD	noDM	UKB	MT-ND5	ND5	NADH dehydrogenase subunit 5	13966	rs41535848	A	G	G	305500	1.05683	0.082857	0.504694	NA
CAD	DM	UKB	MT-ND5	ND5	NADH dehydrogenase subunit 5	13966	rs41535848	A	G	G	31799	0.954949	0.176315	0.793744	NA
CAD	Overall	BiLEVE	MT-ND5	ND5	NADH dehydrogenase subunit 5	14133	rs879100848	A	G	G	40750	0.85252	0.247412	0.518985	NA
CAD	noDM	BiLEVE	MT-ND5	ND5	NADH dehydrogenase subunit 5	14133	rs879100848	A	G	G	36181	0.89285	0.278184	0.683701	NA
CAD	DM	BiLEVE	MT-ND5	ND5	NADH dehydrogenase subunit 5	14133	rs879100848	A	G	G	4569	0.7683	0.534914	0.622195	NA
CAD	Overall	BiLEVE	MT-ND6	ND6	NADH dehydrogenase subunit 6	14167	rs193302977	C	T	T	40803	0.942578	0.0902195	0.512162	NA
CAD	noDM	BiLEVE	MT-ND6	ND6	NADH dehydrogenase subunit 6	14167	rs193302977	C	T	T	36229	0.962664	0.101952	0.708987	NA
CAD	DM	BiLEVE	MT-ND6	ND6	NADH dehydrogenase subunit 6	14167	rs193302977	C	T	T	4574	0.885153	0.193016	0.527359	NA
CAD	Overall	UKB	MT-ND6	ND6	NADH dehydrogenase subunit 6	14167	rs193302977	C	T	T	337417	0.964418	0.0362228	0.317206	NA
CAD	noDM	UKB	MT-ND6	ND6	NADH dehydrogenase subunit 6	14167	rs193302977	C	T	T	305598	0.952365	0.0407292	0.230795	NA
CAD	DM	UKB	MT-ND6	ND6	NADH dehydrogenase subunit 6	14167	rs193302977	C	T	T	31819	1.01145	0.0792585	0.88583	NA
CAD	Overall	BiLEVE	MT-ND6	ND6	NADH dehydrogenase subunit 6	14233	rs3915611,COSM1138250,COSM1138251	A	G	G	40793	0.911622	0.0922259	0.315717	NA
CAD	noDM	BiLEVE	MT-ND6	ND6	NADH dehydrogenase subunit 6	14233	rs3915611,COSM1138250,COSM1138251	A	G	G	36220	0.953882	0.104526	0.651482	NA
CAD	DM	BiLEVE	MT-ND6	ND6	NADH dehydrogenase subunit 6	14233	rs3915611,COSM1138250,COSM1138251	A	G	G	4573	0.775335	0.194714	0.191269	NA
CAD	Overall	UKB	MT-ND6	ND6	NADH dehydrogenase subunit 6	14582	rs41354845	A	G	G	333535	0.876432	0.078213	0.0917242	NA
CAD	noDM	UKB	MT-ND6	ND6	NADH dehydrogenase subunit 6	14582	rs41354845	A	G	G	302130	0.852203	0.0892353	0.0730961	NA
CAD	DM	UKB	MT-ND6	ND6	NADH dehydrogenase subunit 6	14582	rs41354845	A	G	G	31405	0.974855	0.16321	0.876003	NA
CAD	Overall	UKB	MT-ND6	ND6	NADH dehydrogenase subunit 6	14620	rs879141731,COSM6716820,COSM6716821	C	T	T	337246	0.999346	0.0691206	0.992451	NA
CAD	noDM	UKB	MT-ND6	ND6	NADH dehydrogenase subunit 6	14620	rs879141731,COSM6716820,COSM6716821	C	T	T	305451	0.957052	0.0786469	0.576732	NA
CAD	DM	UKB	MT-ND6	ND6	NADH dehydrogenase subunit 6	14620	rs879141731,COSM6716820,COSM6716821	C	T	T	31795	1.17258	0.145915	0.275232	NA
CAD	Overall	BiLEVE	MT-CYB	Cytb	Cytochrome b	14766	rs193302980,rs527236041	T	C	C	40755	1.05654	0.049079	0.262427	NA
CAD	noDM	BiLEVE	MT-CYB	Cytb	Cytochrome b	14766	rs193302980,rs527236041	T	C	C	36187	1.09264	0.0561843	0.114817	NA
CAD	DM	BiLEVE	MT-CYB	Cytb	Cytochrome b	14766	rs193302980,rs527236041	T	C	C	4568	0.946828	0.101047	0.588704	NA
CAD	Overall	BiLEVE	MT-CYB	Cytb	Cytochrome b	14793	rs2853504	A	G	G	40742	1.03505	0.111411	0.757175	NA
CAD	noDM	BiLEVE	MT-CYB	Cytb	Cytochrome b	14793	rs2853504	A	G	G	36179	1.02739	0.12755	0.83224	NA
CAD	DM	BiLEVE	MT-CYB	Cytb	Cytochrome b	14793	rs2853504	A	G	G	4563	1.07098	0.228867	0.764451	NA
CAD	Overall	BiLEVE	MT-CYB	Cytb	Cytochrome b	14798	rs28357681	T	C	C	40801	0.978892	0.0666331	0.748836	NA
CAD	noDM	BiLEVE	MT-CYB	Cytb	Cytochrome b	14798	rs28357681	T	C	C	36232	0.926559	0.0772611	0.323512	NA
CAD	DM	BiLEVE	MT-CYB	Cytb	Cytochrome b	14798	rs28357681	T	C	C	4569	1.17451	0.133215	0.227264	NA
CAD	Overall	UKB	MT-CYB	Cytb	Cytochrome b	14798	rs28357681	T	C	C	337286	1.01688	0.0268422	0.532992	NA
CAD	noDM	UKB	MT-CYB	Cytb	Cytochrome b	14798	rs28357681	T	C	C	305482	1.01498	0.0300833	0.621205	NA
CAD	DM	UKB	MT-CYB	Cytb	Cytochrome b	14798	rs28357681	T	C	C	31804	1.02276	0.0593324	0.704486	NA
CAD	Overall	UKB	MT-CYB	Cytb	Cytochrome b	14869	rs879218419	G	A	A	321892	0.891728	0.101353	0.258203	NA
CAD	noDM	UKB	MT-CYB	Cytb	Cytochrome b	14869	rs879218419	G	A	A	291469	0.981476	0.108433	0.863096	NA
CAD	DM	UKB	MT-CYB	Cytb	Cytochrome b	14869	rs879218419	G	A	A	30423	0.543484	0.278902	0.0287958	NA
CAD	Overall	UKB	MT-CYB	Cytb	Cytochrome b	14872	rs878879194,COSM1133253,COSM1133254	C	T	T	337446	0.910238	0.103749	0.364664	NA
CAD	noDM	UKB	MT-CYB	Cytb	Cytochrome b	14872	rs878879194,COSM1133253,COSM1133254	C	T	T	305630	0.994224	0.110798	0.958301	NA
CAD	DM	UKB	MT-CYB	Cytb	Cytochrome b	14872	rs878879194,COSM1133253,COSM1133254	C	T	T	31816	0.563783	0.289441	0.0477065	NA
CAD	Overall	BiLEVE	MT-CYB	Cytb	Cytochrome b	14905	rs193302983,rs527236203	G	A	A	40742	0.895517	0.0838319	0.18805	NA
CAD	noDM	BiLEVE	MT-CYB	Cytb	Cytochrome b	14905	rs193302983,rs527236203	G	A	A	36178	0.939587	0.0950805	0.51222	NA
CAD	DM	BiLEVE	MT-CYB	Cytb	Cytochrome b	14905	rs193302983,rs527236203	G	A	A	4564	0.763428	0.176343	0.125834	NA
CAD	Overall	UKB	MT-CYB	Cytb	Cytochrome b	14905	rs193302983,rs527236203	G	A	A	337081	0.985527	0.0333641	0.662152	NA
CAD	noDM	UKB	MT-CYB	Cytb	Cytochrome b	14905	rs193302983,rs527236203	G	A	A	305294	0.978851	0.0374468	0.56811	NA
CAD	DM	UKB	MT-CYB	Cytb	Cytochrome b	14905	rs193302983,rs527236203	G	A	A	31787	1.00919	0.0734013	0.900857	NA
CAD	Overall	BiLEVE	MT-CYB	Cytb	Cytochrome b	15043	rs193302985,rs527236043	G	A	A	40735	0.862201	0.132036	0.261471	NA
CAD	noDM	BiLEVE	MT-CYB	Cytb	Cytochrome b	15043	rs193302985,rs527236043	G	A	A	36166	0.80161	0.154987	0.153642	NA
CAD	DM	BiLEVE	MT-CYB	Cytb	Cytochrome b	15043	rs193302985,rs527236043	G	A	A	4569	1.05531	0.256983	0.834058	NA
CAD	Overall	UKB	MT-CYB	Cytb	Cytochrome b	15043	rs193302985,rs527236043	G	A	A	336901	1.11864	0.0475483	0.0183822	NA
CAD	noDM	UKB	MT-CYB	Cytb	Cytochrome b	15043	rs193302985,rs527236043	G	A	A	305130	1.07268	0.0543467	0.196696	NA
CAD	DM	UKB	MT-CYB	Cytb	Cytochrome b	15043	rs193302985,rs527236043	G	A	A	31771	1.30077	0.0989706	0.00788571	NA
CAD	Overall	BiLEVE	MT-CYB	Cytb	Cytochrome b	15218	rs2853506	A	G	G	40732	0.997954	0.126424	0.987073	NA
CAD	noDM	BiLEVE	MT-CYB	Cytb	Cytochrome b	15218	rs2853506	A	G	G	36169	0.953446	0.147992	0.747357	NA
CAD	DM	BiLEVE	MT-CYB	Cytb	Cytochrome b	15218	rs2853506	A	G	G	4563	1.15021	0.245416	0.568521	NA
CAD	Overall	UKB	MT-CYB	Cytb	Cytochrome b	15218	rs2853506	A	G	G	337102	0.980649	0.0515351	0.704559	NA
CAD	noDM	UKB	MT-CYB	Cytb	Cytochrome b	15218	rs2853506	A	G	G	305315	1.03086	0.0565798	0.591188	NA
CAD	DM	UKB	MT-CYB	Cytb	Cytochrome b	15218	rs2853506	A	G	G	31787	0.794396	0.123299	0.0619296	NA
CAD	Overall	BiLEVE	MT-CYB	Cytb	Cytochrome b	15257	rs41518645,COSM1138306,COSM1138307	G	A	A	40768	0.963206	0.167749	0.823165	NA
CAD	noDM	BiLEVE	MT-CYB	Cytb	Cytochrome b	15257	rs41518645,COSM1138306,COSM1138307	G	A	A	36198	0.947262	0.194532	0.780618	NA
CAD	DM	BiLEVE	MT-CYB	Cytb	Cytochrome b	15257	rs41518645,COSM1138306,COSM1138307	G	A	A	4570	1.06168	0.332645	0.857213	NA
CAD	Overall	UKB	MT-CYB	Cytb	Cytochrome b	15257	rs41518645,COSM1138306,COSM1138307	G	A	A	337264	1.05939	0.066557	0.386075	NA
CAD	noDM	UKB	MT-CYB	Cytb	Cytochrome b	15257	rs41518645,COSM1138306,COSM1138307	G	A	A	305468	1.05928	0.0746261	0.440286	NA
CAD	DM	UKB	MT-CYB	Cytb	Cytochrome b	15257	rs41518645,COSM1138306,COSM1138307	G	A	A	31796	1.06949	0.146773	0.647157	NA
CAD	Overall	UKB	MT-CYB	Cytb	Cytochrome b	15301	rs193302991,rs527236045	G	A	A	337205	0.829025	0.135185	0.165435	NA
CAD	noDM	UKB	MT-CYB	Cytb	Cytochrome b	15301	rs193302991,rs527236045	G	A	A	305402	0.763976	0.158659	0.0897258	NA
CAD	DM	UKB	MT-CYB	Cytb	Cytochrome b	15301	rs193302991,rs527236045	G	A	A	31803	1.07418	0.261743	0.78456	NA
CAD	Overall	BiLEVE	MT-CYB	Cytb	Cytochrome b	15452	rs193302994,rs527236209	C	A	A	40628	0.979885	0.0601157	0.735356	NA
CAD	noDM	BiLEVE	MT-CYB	Cytb	Cytochrome b	15452	rs193302994,rs527236209	C	A	A	36073	0.968745	0.0692249	0.646444	NA
CAD	DM	BiLEVE	MT-CYB	Cytb	Cytochrome b	15452	rs193302994,rs527236209	C	A	A	4555	1.01692	0.121738	0.890363	NA
CAD	Overall	UKB	MT-CYB	Cytb	Cytochrome b	15452	rs193302994,rs527236209	C	A	A	336195	1.05216	0.0242218	0.0358038	NA
CAD	noDM	UKB	MT-CYB	Cytb	Cytochrome b	15452	rs193302994,rs527236209	C	A	A	304493	1.05531	0.0271382	0.0472985	NA
CAD	DM	UKB	MT-CYB	Cytb	Cytochrome b	15452	rs193302994,rs527236209	C	A	A	31702	1.03926	0.053563	0.472134	NA
CAD	Overall	BiLEVE	MT-CYB	Cytb	Cytochrome b	15693	rs200975632,COSM6716259,COSM6716260	T	C	C	40812	1.05594	0.166644	0.743962	NA
CAD	noDM	BiLEVE	MT-CYB	Cytb	Cytochrome b	15693	rs200975632,COSM6716259,COSM6716260	T	C	C	36240	0.992126	0.198165	0.968181	NA
CAD	DM	BiLEVE	MT-CYB	Cytb	Cytochrome b	15693	rs200975632,COSM6716259,COSM6716260	T	C	C	4572	1.24485	0.312883	0.48393	NA
CAD	Overall	UKB	MT-CYB	Cytb	Cytochrome b	15693	rs200975632,COSM6716259,COSM6716260	T	C	C	337504	1.02038	0.0691568	0.770495	NA
CAD	noDM	UKB	MT-CYB	Cytb	Cytochrome b	15693	rs200975632,COSM6716259,COSM6716260	T	C	C	305676	0.976925	0.078682	0.766693	NA
CAD	DM	UKB	MT-CYB	Cytb	Cytochrome b	15693	rs200975632,COSM6716259,COSM6716260	T	C	C	31828	1.20009	0.146051	0.211726	NA
CAD	Overall	BiLEVE	MT-CYB	Cytb	Cytochrome b	15758	rs527236193	A	G	G	40788	1.04579	0.173369	0.796229	NA
CAD	noDM	BiLEVE	MT-CYB	Cytb	Cytochrome b	15758	rs527236193	A	G	G	36219	0.999369	0.202458	0.997513	NA
CAD	DM	BiLEVE	MT-CYB	Cytb	Cytochrome b	15758	rs527236193	A	G	G	4569	1.19218	0.340834	0.60603	NA
CAD	Overall	UKB	MT-CYB	Cytb	Cytochrome b	15758	rs527236193	A	G	G	337296	1.01673	0.0714839	0.816438	NA
CAD	noDM	UKB	MT-CYB	Cytb	Cytochrome b	15758	rs527236193	A	G	G	305492	0.989284	0.0805907	0.893651	NA
CAD	DM	UKB	MT-CYB	Cytb	Cytochrome b	15758	rs527236193	A	G	G	31804	1.12892	0.155541	0.43563	NA
CAD	Overall	BiLEVE	MT-CYB	Cytb	Cytochrome b	15833	rs41504845	C	T	T	40780	0.811303	0.192088	0.276315	NA
CAD	noDM	BiLEVE	MT-CYB	Cytb	Cytochrome b	15833	rs41504845	C	T	T	36212	0.835937	0.217355	0.409673	NA
CAD	DM	BiLEVE	MT-CYB	Cytb	Cytochrome b	15833	rs41504845	C	T	T	4568	0.728585	0.408229	0.437945	NA
CAD	Overall	UKB	MT-CYB	Cytb	Cytochrome b	15833	rs41504845	C	T	T	337209	0.963346	0.0736032	0.611908	NA
CAD	noDM	UKB	MT-CYB	Cytb	Cytochrome b	15833	rs41504845	C	T	T	305418	1.00846	0.0809601	0.917139	NA
CAD	DM	UKB	MT-CYB	Cytb	Cytochrome b	15833	rs41504845	C	T	T	31791	0.79785	0.174632	0.195941	NA
CAD	Overall	BiLEVE	MT-CYB	Cytb	Cytochrome b	15884	rs527236195	G	A	A	40724	1.28776	0.189618	0.182289	NA
CAD	noDM	BiLEVE	MT-CYB	Cytb	Cytochrome b	15884	rs527236195	G	A	A	36157	1.25411	0.221113	0.305823	NA
CAD	DM	BiLEVE	MT-CYB	Cytb	Cytochrome b	15884	rs527236195	G	A	A	4567	1.37539	0.371272	0.390621	NA
CAD	Overall	UKB	MT-CYB	Cytb	Cytochrome b	15884	rs527236195	G	A	A	336808	0.990158	0.087012	0.909497	NA
CAD	noDM	UKB	MT-CYB	Cytb	Cytochrome b	15884	rs527236195	G	A	A	305044	0.97181	0.0977585	0.769901	NA
CAD	DM	UKB	MT-CYB	Cytb	Cytochrome b	15884	rs527236195	G	A	A	31764	1.07344	0.191427	0.711232	NA
CAD	Overall	UKB	MT-TT	T	tRNA threonine	15924	-	A	G	G	336380	1.0869	0.0406438	0.0403516	NA
CAD	noDM	UKB	MT-TT	T	tRNA threonine	15924	-	A	G	G	304661	1.09402	0.0454521	0.0480492	NA
CAD	DM	UKB	MT-TT	T	tRNA threonine	15924	-	A	G	G	31719	1.06111	0.0904583	0.511992	NA
CAD	Overall	BiLEVE	MT-TT	T	tRNA threonine	15928	rs527236198	G	A	A	40576	0.919555	0.0834954	0.315169	NA
CAD	noDM	BiLEVE	MT-TT	T	tRNA threonine	15928	rs527236198	G	A	A	36035	0.952543	0.0951432	0.609334	NA
CAD	DM	BiLEVE	MT-TT	T	tRNA threonine	15928	rs527236198	G	A	A	4541	0.822508	0.17324	0.259364	NA
CAD	Overall	UKB	MT-TT	T	tRNA threonine	15928	rs527236198	G	A	A	335666	0.989835	0.0334285	0.75988	NA
CAD	noDM	UKB	MT-TT	T	tRNA threonine	15928	rs527236198	G	A	A	304013	0.985994	0.0374991	0.706805	NA
CAD	DM	UKB	MT-TT	T	tRNA threonine	15928	rs527236198	G	A	A	31653	1.00273	0.073658	0.970513	NA
CAD	Overall	UKB	MT-HV1	CR:HVS1/HV1	Hypervariable segment 1 [classic:16024-16365]	16145	rs41419246	G	A	A	337039	1.0682	0.0538142	0.220198	NA
CAD	noDM	UKB	MT-HV1	CR:HVS1/HV1	Hypervariable segment 1 [classic:16024-16365]	16145	rs41419246	G	A	A	305254	1.11741	0.0592669	0.0610604	NA
CAD	DM	UKB	MT-HV1	CR:HVS1/HV1	Hypervariable segment 1 [classic:16024-16365]	16145	rs41419246	G	A	A	31785	0.888722	0.126779	0.352102	NA
CAD	Overall	BiLEVE	MT-TAS	CR:TAS	termination-associated sequence	16162	rs41466049	A	G	G	40725	0.897876	0.167357	0.519787	NA
CAD	noDM	BiLEVE	MT-TAS	CR:TAS	termination-associated sequence	16162	rs41466049	A	G	G	36158	1.00204	0.183251	0.991122	NA
CAD	DM	BiLEVE	MT-TAS	CR:TAS	termination-associated sequence	16162	rs41466049	A	G	G	4567	0.592188	0.401255	0.191644	NA
CAD	Overall	BiLEVE	MT-TAS	CR:TAS	termination-associated sequence	16172	rs2853817	T	C	C	40692	0.838563	0.133075	0.185814	NA
CAD	noDM	BiLEVE	MT-TAS	CR:TAS	termination-associated sequence	16172	rs2853817	T	C	C	36122	0.926153	0.146787	0.601226	NA
CAD	DM	BiLEVE	MT-TAS	CR:TAS	termination-associated sequence	16172	rs2853817	T	C	C	4570	0.566031	0.309493	0.0659397	NA
CAD	Overall	BiLEVE	MT-HV1	CR:HVS1/HV1	Hypervariable segment 1 [classic:16024-16365]	16193	rs879091650	C	T	T	40648	1.10932	0.201034	0.605816	NA
CAD	noDM	BiLEVE	MT-HV1	CR:HVS1/HV1	Hypervariable segment 1 [classic:16024-16365]	16193	rs879091650	C	T	T	36095	0.951267	0.245784	0.838925	NA
CAD	DM	BiLEVE	MT-HV1	CR:HVS1/HV1	Hypervariable segment 1 [classic:16024-16365]	16193	rs879091650	C	T	T	4553	1.6377	0.364187	0.175575	NA
CAD	Overall	UKB	MT-HV1	CR:HVS1/HV1	Hypervariable segment 1 [classic:16024-16365]	16193	rs879091650	C	T	T	336424	0.992735	0.0889835	0.934693	NA
CAD	noDM	UKB	MT-HV1	CR:HVS1/HV1	Hypervariable segment 1 [classic:16024-16365]	16193	rs879091650	C	T	T	304708	0.999187	0.100913	0.993573	NA
CAD	DM	UKB	MT-HV1	CR:HVS1/HV1	Hypervariable segment 1 [classic:16024-16365]	16193	rs879091650	C	T	T	31716	0.985339	0.188059	0.937399	NA
CAD	Overall	BiLEVE	MT-HV1	CR:HVS1/HV1	Hypervariable segment 1 [classic:16024-16365]	16223	rs2853513	C	T	T	40712	0.94264	0.0965737	0.540761	NA
CAD	noDM	BiLEVE	MT-HV1	CR:HVS1/HV1	Hypervariable segment 1 [classic:16024-16365]	16223	rs2853513	C	T	T	36154	0.802525	0.11712	0.0603335	NA
CAD	DM	BiLEVE	MT-HV1	CR:HVS1/HV1	Hypervariable segment 1 [classic:16024-16365]	16223	rs2853513	C	T	T	4558	1.42829	0.177439	0.0445366	NA
CAD	Overall	UKB	MT-HV1	CR:HVS1/HV1	Hypervariable segment 1 [classic:16024-16365]	16270	rs2857290	C	T	T	336490	0.934679	0.0359922	0.0605389	NA
CAD	noDM	UKB	MT-HV1	CR:HVS1/HV1	Hypervariable segment 1 [classic:16024-16365]	16270	rs2857290	C	T	T	304753	0.935981	0.0403116	0.100754	NA
CAD	DM	UKB	MT-HV1	CR:HVS1/HV1	Hypervariable segment 1 [classic:16024-16365]	16270	rs2857290	C	T	T	31737	0.930738	0.0797208	0.367925	NA
CAD	Overall	BiLEVE	MT-HV1	CR:HVS1/HV1	Hypervariable segment 1 [classic:16024-16365]	16298	rs148377232	T	C	C	40748	1.2003	0.114397	0.110507	NA
CAD	noDM	BiLEVE	MT-HV1	CR:HVS1/HV1	Hypervariable segment 1 [classic:16024-16365]	16298	rs148377232	T	C	C	36184	1.14963	0.133671	0.296863	NA
CAD	DM	BiLEVE	MT-HV1	CR:HVS1/HV1	Hypervariable segment 1 [classic:16024-16365]	16298	rs148377232	T	C	C	4564	1.34165	0.223357	0.188227	NA
CAD	Overall	BiLEVE	MT-HV1	CR:HVS1/HV1	Hypervariable segment 1 [classic:16024-16365]	16356	rs62581340	T	C	C	40596	1.05007	0.121255	0.687008	NA
CAD	noDM	BiLEVE	MT-HV1	CR:HVS1/HV1	Hypervariable segment 1 [classic:16024-16365]	16356	rs62581340	T	C	C	36040	1.02791	0.140814	0.845031	NA
CAD	DM	BiLEVE	MT-HV1	CR:HVS1/HV1	Hypervariable segment 1 [classic:16024-16365]	16356	rs62581340	T	C	C	4556	1.0934	0.23977	0.709598	NA
CAD	Overall	UKB	MT-HV1	CR:HVS1/HV1	Hypervariable segment 1 [classic:16024-16365]	16356	rs62581340	T	C	C	335787	0.981344	0.0506707	0.710147	NA
CAD	noDM	UKB	MT-HV1	CR:HVS1/HV1	Hypervariable segment 1 [classic:16024-16365]	16356	rs62581340	T	C	C	304156	0.962118	0.0571603	0.499289	NA
CAD	DM	UKB	MT-HV1	CR:HVS1/HV1	Hypervariable segment 1 [classic:16024-16365]	16356	rs62581340	T	C	C	31631	1.06086	0.109719	0.590238	NA
CAD	Overall	BiLEVE	MT-HV1	CR:HVS1/HV1	Hypervariable segment 1 [classic:16024-16365]	16362	rs62581341	T	C	C	40692	1.1135	0.0850819	0.206361	NA
CAD	noDM	BiLEVE	MT-HV1	CR:HVS1/HV1	Hypervariable segment 1 [classic:16024-16365]	16362	rs62581341	T	C	C	36129	1.05908	0.0999618	0.565807	NA
CAD	DM	BiLEVE	MT-HV1	CR:HVS1/HV1	Hypervariable segment 1 [classic:16024-16365]	16362	rs62581341	T	C	C	4563	1.28932	0.163879	0.120993	NA
CAD	Overall	UKB	MT-HV1	CR:HVS1/HV1	Hypervariable segment 1 [classic:16024-16365]	16362	rs62581341	T	C	C	336581	0.927897	0.0371309	0.043861	NA
CAD	noDM	UKB	MT-HV1	CR:HVS1/HV1	Hypervariable segment 1 [classic:16024-16365]	16362	rs62581341	T	C	C	304849	0.930736	0.0415668	0.0841937	NA
CAD	DM	UKB	MT-HV1	CR:HVS1/HV1	Hypervariable segment 1 [classic:16024-16365]	16362	rs62581341	T	C	C	31732	0.913585	0.0823891	0.272649	NA
CAD	Overall	UKB	NA	CR:HVS2	Hypervariable segment 2 [classic:73-340 ]	16391	rs869031877	G	A	A	336381	1.1191	0.0530017	0.0337544	NA
CAD	noDM	UKB	NA	CR:HVS2	Hypervariable segment 2 [classic:73-340 ]	16391	rs869031877	G	A	A	304647	1.08574	0.0602451	0.172104	NA
CAD	DM	UKB	NA	CR:HVS2	Hypervariable segment 2 [classic:73-340 ]	16391	rs869031877	G	A	A	31734	1.25116	0.112056	0.0455402	NA

## Sheet: CVD
PHENO	COHORT	ARRAY	GENE	REGION	DESCRIPTION	BP	RS	REF	ALT	A1	OBS_CT	OR.or.BETA	SE.or.LOG(OR)_SE	P	SP2
CVD	Overall	BiLEVE	MT-HV2	CR:HVS2	Hypervariable segment 2 [classic:73-340 ]	73	rs869183622	G	A	A	40766	0.995315	0.0215748	0.827691	NA
CVD	noDM	BiLEVE	MT-HV2	CR:HVS2	Hypervariable segment 2 [classic:73-340 ]	73	rs869183622	G	A	A	36199	0.986253	0.022937	0.546175	NA
CVD	DM	BiLEVE	MT-HV2	CR:HVS2	Hypervariable segment 2 [classic:73-340 ]	73	rs869183622	G	A	A	4567	1.06816	0.063921	0.302301	NA
CVD	Overall	UKB	MT-HV2	CR:HVS2	Hypervariable segment 2 [classic:73-340 ]	73	rs869183622	G	A	A	337090	1.00448	0.00760556	0.556513	NA
CVD	noDM	UKB	MT-HV2	CR:HVS2	Hypervariable segment 2 [classic:73-340 ]	73	rs869183622	G	A	A	305316	1.00735	0.00802342	0.361654	NA
CVD	DM	UKB	MT-HV2	CR:HVS2	Hypervariable segment 2 [classic:73-340 ]	73	rs869183622	G	A	A	31774	0.979855	0.0239311	0.395104	NA
CVD	Overall	BiLEVE	MT-OHR	CR:OH	H-strand origins	150	rs62581312	C	T	T	40740	0.987803	0.0367976	0.738754	NA
CVD	noDM	BiLEVE	MT-OHR	CR:OH	H-strand origins	150	rs62581312	C	T	T	36177	1.00352	0.0390173	0.928328	NA
CVD	DM	BiLEVE	MT-OHR	CR:OH	H-strand origins	150	rs62581312	C	T	T	4563	0.874851	0.108831	0.21925	NA
CVD	Overall	UKB	MT-OHR	CR:OH	H-strand origins	150	rs62581312	C	T	T	336915	0.999789	0.0130828	0.987142	NA
CVD	noDM	UKB	MT-OHR	CR:OH	H-strand origins	150	rs62581312	C	T	T	305139	0.993719	0.0138102	0.648192	NA
CVD	DM	UKB	MT-OHR	CR:OH	H-strand origins	150	rs62581312	C	T	T	31776	1.05495	0.0413379	0.195611	NA
CVD	Overall	BiLEVE	MT-OHR	CR:OH	H-strand origins	228	rs41323649	G	A	A	40720	1.02884	0.0434093	0.512432	NA
CVD	noDM	BiLEVE	MT-OHR	CR:OH	H-strand origins	228	rs41323649	G	A	A	36157	1.02763	0.0459995	0.553524	NA
CVD	DM	BiLEVE	MT-OHR	CR:OH	H-strand origins	228	rs41323649	G	A	A	4563	1.03702	0.131889	0.782846	NA
CVD	Overall	UKB	MT-OHR	CR:OH	H-strand origins	228	rs41323649	G	A	A	336678	0.997877	0.0153964	0.890227	NA
CVD	noDM	UKB	MT-OHR	CR:OH	H-strand origins	228	rs41323649	G	A	A	304919	0.995265	0.0162711	0.770513	NA
CVD	DM	UKB	MT-OHR	CR:OH	H-strand origins	228	rs41323649	G	A	A	31759	1.02057	0.0479137	0.670893	NA
CVD	Overall	BiLEVE	MT-TFX	CR:TFX	mtTF1 binding site	239	rs879149197	T	C	C	40737	0.958504	0.0638681	0.50696	NA
CVD	noDM	BiLEVE	MT-TFX	CR:TFX	mtTF1 binding site	239	rs879149197	T	C	C	36170	0.968875	0.0676376	0.640148	NA
CVD	DM	BiLEVE	MT-TFX	CR:TFX	mtTF1 binding site	239	rs879149197	T	C	C	4567	0.887087	0.191666	0.531899	NA
CVD	Overall	BiLEVE	MT-OHR	CR:OH	H-strand origins	263	rs2853515	G	A	A	40797	0.928076	0.102529	0.46661	NA
CVD	noDM	BiLEVE	MT-OHR	CR:OH	H-strand origins	263	rs2853515	G	A	A	36230	0.965128	0.107698	0.74172	NA
CVD	DM	BiLEVE	MT-OHR	CR:OH	H-strand origins	263	rs2853515	G	A	A	4567	0.642185	0.312878	0.156923	NA
CVD	Overall	UKB	MT-TFY	CR:TFY	mtTF1 binding site	295	rs41528348	C	T	T	334942	1.00228	0.0122062	0.852198	NA
CVD	noDM	UKB	MT-TFY	CR:TFY	mtTF1 binding site	295	rs41528348	C	T	T	303341	0.998639	0.0128928	0.915866	NA
CVD	DM	UKB	MT-TFY	CR:TFY	mtTF1 binding site	295	rs41528348	C	T	T	31601	1.03106	0.038215	0.423422	NA
CVD	Overall	BiLEVE	MT-HV3	CR:HVS3	Hypervariable segment 3	456	rs41356551	C	T	T	40692	1.00559	0.0550496	0.919331	NA
CVD	noDM	BiLEVE	MT-HV3	CR:HVS3	Hypervariable segment 3	456	rs41356551	C	T	T	36134	1.02708	0.0584111	0.647381	NA
CVD	DM	BiLEVE	MT-HV3	CR:HVS3	Hypervariable segment 3	456	rs41356551	C	T	T	4558	0.862394	0.160116	0.355173	NA
CVD	Overall	BiLEVE	MT-HV3	CR:HVS3	Hypervariable segment 3	497	rs28660704	C	T	T	40808	1.0583	0.0497936	0.255168	NA
CVD	noDM	BiLEVE	MT-HV3	CR:HVS3	Hypervariable segment 3	497	rs28660704	C	T	T	36235	1.07109	0.0526889	0.192413	NA
CVD	DM	BiLEVE	MT-HV3	CR:HVS3	Hypervariable segment 3	497	rs28660704	C	T	T	4573	0.961477	0.150117	0.793556	NA
CVD	Overall	UKB	MT-HV3	CR:HVS3	Hypervariable segment 3	497	rs28660704	C	T	T	337374	1.02861	0.0177525	0.112019	NA
CVD	noDM	UKB	MT-HV3	CR:HVS3	Hypervariable segment 3	497	rs28660704	C	T	T	305563	1.03545	0.0186806	0.0622207	NA
CVD	DM	UKB	MT-HV3	CR:HVS3	Hypervariable segment 3	497	rs28660704	C	T	T	31811	0.969432	0.0565298	0.582884	NA
CVD	Overall	BiLEVE	MT-RNR1	12S	12S ribosomal RNA	709	rs2853517	G	A	A	40647	1.06441	0.0301329	0.0383085	NA
CVD	noDM	BiLEVE	MT-RNR1	12S	12S ribosomal RNA	709	rs2853517	G	A	A	36097	1.07603	0.0319816	0.021945	NA
CVD	DM	BiLEVE	MT-RNR1	12S	12S ribosomal RNA	709	rs2853517	G	A	A	4550	0.972252	0.0891469	0.752261	NA
CVD	Overall	UKB	MT-RNR1	12S	12S ribosomal RNA	709	rs2853517	G	A	A	335789	1.03336	0.0106973	0.00215952	NA
CVD	noDM	UKB	MT-RNR1	12S	12S ribosomal RNA	709	rs2853517	G	A	A	304121	1.03114	0.0112829	0.00656628	NA
CVD	DM	UKB	MT-RNR1	12S	12S ribosomal RNA	709	rs2853517	G	A	A	31668	1.0547	0.0338034	0.115124	NA
CVD	Overall	UKB	MT-RNR1	12S	12S ribosomal RNA	750	rs2853518	G	A	A	330209	0.938463	0.029676	0.0323403	NA
CVD	noDM	UKB	MT-RNR1	12S	12S ribosomal RNA	750	rs2853518	G	A	A	299195	0.943729	0.0312931	0.0642011	NA
CVD	DM	UKB	MT-RNR1	12S	12S ribosomal RNA	750	rs2853518	G	A	A	31014	0.895238	0.0929863	0.233995	NA
CVD	Overall	BiLEVE	MT-RNR1	12S	12S ribosomal RNA	1243	rs28358572	T	C	C	40828	1.02376	0.0787274	0.765524	NA
CVD	noDM	BiLEVE	MT-RNR1	12S	12S ribosomal RNA	1243	rs28358572	T	C	C	36253	1.06028	0.0839898	0.48586	NA
CVD	DM	BiLEVE	MT-RNR1	12S	12S ribosomal RNA	1243	rs28358572	T	C	C	4575	0.808646	0.217315	0.328394	NA
CVD	Overall	UKB	MT-RNR1	12S	12S ribosomal RNA	1243	rs28358572	T	C	C	337626	1.01603	0.0271765	0.558522	NA
CVD	noDM	UKB	MT-RNR1	12S	12S ribosomal RNA	1243	rs28358572	T	C	C	305793	1.00252	0.0287038	0.930137	NA
CVD	DM	UKB	MT-RNR1	12S	12S ribosomal RNA	1243	rs28358572	T	C	C	31833	1.15551	0.0866967	0.0954694	NA
CVD	Overall	BiLEVE	MT-RNR1	12S	12S ribosomal RNA	1438	rs2001030	G	A	A	40762	1.06864	0.0645504	0.303727	NA
CVD	noDM	BiLEVE	MT-RNR1	12S	12S ribosomal RNA	1438	rs2001030	G	A	A	36194	1.05115	0.0688453	0.468717	NA
CVD	DM	BiLEVE	MT-RNR1	12S	12S ribosomal RNA	1438	rs2001030	G	A	A	4568	1.16261	0.19184	0.432225	NA
CVD	Overall	UKB	MT-RNR1	12S	12S ribosomal RNA	1438	rs2001030	G	A	A	336989	0.944092	0.0230593	0.012598	NA
CVD	noDM	UKB	MT-RNR1	12S	12S ribosomal RNA	1438	rs2001030	G	A	A	305208	0.946824	0.0244081	0.0251752	NA
CVD	DM	UKB	MT-RNR1	12S	12S ribosomal RNA	1438	rs2001030	G	A	A	31781	0.922526	0.070336	0.251592	NA
CVD	Overall	BiLEVE	MT-RNR2	16S	16S ribosomal RNA	1719	rs3928305	G	A	A	40743	0.958716	0.0391946	0.282073	NA
CVD	noDM	BiLEVE	MT-RNR2	16S	16S ribosomal RNA	1719	rs3928305	G	A	A	36175	0.962345	0.0415722	0.355872	NA
CVD	DM	BiLEVE	MT-RNR2	16S	16S ribosomal RNA	1719	rs3928305	G	A	A	4568	0.936582	0.117339	0.576598	NA
CVD	Overall	UKB	MT-RNR2	16S	16S ribosomal RNA	1719	rs3928305	G	A	A	336999	0.967875	0.0138013	0.0179881	NA
CVD	noDM	UKB	MT-RNR2	16S	16S ribosomal RNA	1719	rs3928305	G	A	A	305220	0.973305	0.0145465	0.0628717	NA
CVD	DM	UKB	MT-RNR2	16S	16S ribosomal RNA	1719	rs3928305	G	A	A	31779	0.919062	0.0434406	0.052024	NA
CVD	Overall	BiLEVE	MT-RNR2	16S	16S ribosomal RNA	1721	rs200626438	C	T	T	40823	0.977078	0.0664898	0.727274	NA
CVD	noDM	BiLEVE	MT-RNR2	16S	16S ribosomal RNA	1721	rs200626438	C	T	T	36248	0.992833	0.0705796	0.918831	NA
CVD	DM	BiLEVE	MT-RNR2	16S	16S ribosomal RNA	1721	rs200626438	C	T	T	4575	0.868371	0.193966	0.466839	NA
CVD	Overall	UKB	MT-RNR2	16S	16S ribosomal RNA	1721	rs200626438	C	T	T	337524	0.984142	0.023541	0.497122	NA
CVD	noDM	UKB	MT-RNR2	16S	16S ribosomal RNA	1721	rs200626438	C	T	T	305691	0.985864	0.0248276	0.566342	NA
CVD	DM	UKB	MT-RNR2	16S	16S ribosomal RNA	1721	rs200626438	C	T	T	31833	0.97029	0.0740866	0.683938	NA
CVD	Overall	BiLEVE	MT-RNR2	16S	16S ribosomal RNA	1811	rs28358576	A	G	G	40791	0.992163	0.0319873	0.805705	NA
CVD	noDM	BiLEVE	MT-RNR2	16S	16S ribosomal RNA	1811	rs28358576	A	G	G	36220	0.997336	0.0338867	0.937265	NA
CVD	DM	BiLEVE	MT-RNR2	16S	16S ribosomal RNA	1811	rs28358576	A	G	G	4571	0.945184	0.0966681	0.55977	NA
CVD	Overall	UKB	MT-RNR2	16S	16S ribosomal RNA	2158	rs41349444	T	C	C	337625	1.07009	0.031893	0.0336676	NA
CVD	noDM	UKB	MT-RNR2	16S	16S ribosomal RNA	2158	rs41349444	T	C	C	305788	1.06488	0.0336364	0.0616403	NA
CVD	DM	UKB	MT-RNR2	16S	16S ribosomal RNA	2158	rs41349444	T	C	C	31837	1.11019	0.101512	0.303116	NA
CVD	Overall	BiLEVE	MT-RNR2	16S	16S ribosomal RNA	2706	rs2854128	G	A	A	40789	0.999185	0.0216227	0.969925	NA
CVD	noDM	BiLEVE	MT-RNR2	16S	16S ribosomal RNA	2706	rs2854128	G	A	A	36214	0.996247	0.0229861	0.870066	NA
CVD	DM	BiLEVE	MT-RNR2	16S	16S ribosomal RNA	2706	rs2854128	G	A	A	4575	1.02219	0.0640872	0.732031	NA
CVD	Overall	UKB	MT-RNR2	16S	16S ribosomal RNA	2706	rs2854128	G	A	A	337187	0.997172	0.0076239	0.710269	NA
CVD	noDM	UKB	MT-RNR2	16S	16S ribosomal RNA	2706	rs2854128	G	A	A	305392	0.998089	0.00804276	0.812056	NA
CVD	DM	UKB	MT-RNR2	16S	16S ribosomal RNA	2706	rs2854128	G	A	A	31795	0.990269	0.0239975	0.683645	NA
CVD	Overall	BiLEVE	MT-RNR2	16S	16S ribosomal RNA	3010	rs3928306	G	A	A	40770	0.986175	0.0244401	0.56895	NA
CVD	noDM	BiLEVE	MT-RNR2	16S	16S ribosomal RNA	3010	rs3928306	G	A	A	36203	0.982468	0.0259778	0.495965	NA
CVD	DM	BiLEVE	MT-RNR2	16S	16S ribosomal RNA	3010	rs3928306	G	A	A	4567	1.01366	0.0726071	0.851759	NA
CVD	Overall	UKB	MT-RNR2	16S	16S ribosomal RNA	3010	rs3928306	G	A	A	336907	0.99081	0.00863333	0.284897	NA
CVD	noDM	UKB	MT-RNR2	16S	16S ribosomal RNA	3010	rs3928306	G	A	A	305142	0.984262	0.00911439	0.0817797	NA
CVD	DM	UKB	MT-RNR2	16S	16S ribosomal RNA	3010	rs3928306	G	A	A	31765	1.04943	0.02716	0.0756477	NA
CVD	Overall	BiLEVE	MT-RNR2	16S	16S ribosomal RNA	3197	rs2854131	T	C	C	40716	0.992335	0.0371669	0.835985	NA
CVD	noDM	BiLEVE	MT-RNR2	16S	16S ribosomal RNA	3197	rs2854131	T	C	C	36153	1.01179	0.0394783	0.766493	NA
CVD	DM	BiLEVE	MT-RNR2	16S	16S ribosomal RNA	3197	rs2854131	T	C	C	4563	0.864881	0.108138	0.179472	NA
CVD	Overall	UKB	MT-RNR2	16S	16S ribosomal RNA	3197	rs2854131	T	C	C	336917	0.959464	0.0131865	0.00170036	NA
CVD	noDM	UKB	MT-RNR2	16S	16S ribosomal RNA	3197	rs2854131	T	C	C	305149	0.962644	0.0139168	0.00622507	NA
CVD	DM	UKB	MT-RNR2	16S	16S ribosomal RNA	3197	rs2854131	T	C	C	31768	0.933058	0.0411903	0.0925409	NA
CVD	Overall	UKB	MT-ND1	ND1	NADH Dehydrogenase subunit 1	3394	rs41460449	T	C	C	337027	1.03174	0.0313541	0.318971	NA
CVD	noDM	UKB	MT-ND1	ND1	NADH Dehydrogenase subunit 1	3394	rs41460449	T	C	C	305240	1.02893	0.0330782	0.388583	NA
CVD	DM	UKB	MT-ND1	ND1	NADH Dehydrogenase subunit 1	3394	rs41460449	T	C	C	31787	1.06036	0.0992178	0.554692	NA
CVD	Overall	BiLEVE	MT-ND1	ND1	NADH Dehydrogenase subunit 1	3480	rs28358584	A	G	G	40799	1.013	0.0382672	0.735803	NA
CVD	noDM	BiLEVE	MT-ND1	ND1	NADH Dehydrogenase subunit 1	3480	rs28358584	A	G	G	36226	1.01424	0.0404693	0.726827	NA
CVD	DM	BiLEVE	MT-ND1	ND1	NADH Dehydrogenase subunit 1	3480	rs28358584	A	G	G	4573	0.999207	0.118003	0.994636	NA
CVD	Overall	UKB	MT-ND1	ND1	NADH Dehydrogenase subunit 1	3480	rs28358584	A	G	G	337357	1.01351	0.013483	0.319536	NA
CVD	noDM	UKB	MT-ND1	ND1	NADH Dehydrogenase subunit 1	3480	rs28358584	A	G	G	305547	1.01601	0.0142073	0.263505	NA
CVD	DM	UKB	MT-ND1	ND1	NADH Dehydrogenase subunit 1	3480	rs28358584	A	G	G	31810	0.991802	0.0427044	0.847151	NA
CVD	Overall	UKB	MT-ND1	ND1	NADH Dehydrogenase subunit 1	3720	rs41355750	A	G	G	337032	0.998554	0.0348546	0.966884	NA
CVD	noDM	UKB	MT-ND1	ND1	NADH Dehydrogenase subunit 1	3720	rs41355750	A	G	G	305259	0.993665	0.036852	0.863073	NA
CVD	DM	UKB	MT-ND1	ND1	NADH Dehydrogenase subunit 1	3720	rs41355750	A	G	G	31773	1.04824	0.108681	0.664639	NA
CVD	Overall	BiLEVE	MT-ND1	ND1	NADH Dehydrogenase subunit 1	3796	rs28357970	A	G	G	40789	1.03857	0.084072	0.652613	NA
CVD	noDM	BiLEVE	MT-ND1	ND1	NADH Dehydrogenase subunit 1	3796	rs28357970	A	G	G	36216	1.02109	0.0899019	0.816419	NA
CVD	DM	BiLEVE	MT-ND1	ND1	NADH Dehydrogenase subunit 1	3796	rs28357970	A	G	G	4573	1.16282	0.241855	0.532823	NA
CVD	Overall	UKB	MT-ND1	ND1	NADH Dehydrogenase subunit 1	3796	rs28357970	A	G	G	337305	0.992157	0.0302837	0.794849	NA
CVD	noDM	UKB	MT-ND1	ND1	NADH Dehydrogenase subunit 1	3796	rs28357970	A	G	G	305499	0.986001	0.0319534	0.65906	NA
CVD	DM	UKB	MT-ND1	ND1	NADH Dehydrogenase subunit 1	3796	rs28357970	A	G	G	31806	1.04251	0.0961715	0.66508	NA
CVD	Overall	UKB	MT-ND1	ND1	NADH Dehydrogenase subunit 1	3915	rs41524046,COSM1138362,COSM1138363	G	A	A	337269	1.0046	0.0235389	0.845391	NA
CVD	noDM	UKB	MT-ND1	ND1	NADH Dehydrogenase subunit 1	3915	rs41524046,COSM1138362,COSM1138363	G	A	A	305457	1.01099	0.0248196	0.659534	NA
CVD	DM	UKB	MT-ND1	ND1	NADH Dehydrogenase subunit 1	3915	rs41524046,COSM1138362,COSM1138363	G	A	A	31812	0.951779	0.0736321	0.502086	NA
CVD	Overall	BiLEVE	MT-ND1	ND1	NADH Dehydrogenase subunit 1	3992	rs879051705	C	T	T	40806	1.01619	0.0710168	0.821109	NA
CVD	noDM	BiLEVE	MT-ND1	ND1	NADH Dehydrogenase subunit 1	3992	rs879051705	C	T	T	36233	1.00215	0.074924	0.977152	NA
CVD	DM	BiLEVE	MT-ND1	ND1	NADH Dehydrogenase subunit 1	3992	rs879051705	C	T	T	4573	1.15223	0.229431	0.536822	NA
CVD	Overall	UKB	MT-ND1	ND1	NADH Dehydrogenase subunit 1	3992	rs879051705	C	T	T	337330	0.979794	0.0252879	0.419529	NA
CVD	noDM	UKB	MT-ND1	ND1	NADH Dehydrogenase subunit 1	3992	rs879051705	C	T	T	305514	0.994949	0.0265848	0.84893	NA
CVD	DM	UKB	MT-ND1	ND1	NADH Dehydrogenase subunit 1	3992	rs879051705	C	T	T	31816	0.848951	0.080158	0.0410631	NA
CVD	Overall	BiLEVE	MT-ND1	ND1	NADH Dehydrogenase subunit 1	4024	-	A	G	G	40794	1.03705	0.0767727	0.635607	NA
CVD	noDM	BiLEVE	MT-ND1	ND1	NADH Dehydrogenase subunit 1	4024	-	A	G	G	36224	1.0113	0.0812789	0.890011	NA
CVD	DM	BiLEVE	MT-ND1	ND1	NADH Dehydrogenase subunit 1	4024	-	A	G	G	4570	1.28886	0.245747	0.301788	NA
CVD	Overall	UKB	MT-ND1	ND1	NADH Dehydrogenase subunit 1	4024	-	A	G	G	337415	0.989979	0.0274336	0.713521	NA
CVD	noDM	UKB	MT-ND1	ND1	NADH Dehydrogenase subunit 1	4024	-	A	G	G	305604	1.00913	0.0288167	0.752338	NA
CVD	DM	UKB	MT-ND1	ND1	NADH Dehydrogenase subunit 1	4024	-	A	G	G	31811	0.827548	0.0870861	0.0297373	NA
CVD	Overall	BiLEVE	MT-ND1	ND1	NADH Dehydrogenase subunit 1	4216	COSM1138370,COSM1138371	T	C	C	40749	1.0258	0.0260686	0.328507	NA
CVD	noDM	BiLEVE	MT-ND1	ND1	NADH Dehydrogenase subunit 1	4216	COSM1138370,COSM1138371	T	C	C	36184	1.0274	0.0276957	0.329039	NA
CVD	DM	BiLEVE	MT-ND1	ND1	NADH Dehydrogenase subunit 1	4216	COSM1138370,COSM1138371	T	C	C	4565	1.0137	0.0775528	0.860721	NA
CVD	Overall	UKB	MT-ND1	ND1	NADH Dehydrogenase subunit 1	4216	COSM1138370,COSM1138371	T	C	C	337149	1.02346	0.0092451	0.0121257	NA
CVD	noDM	UKB	MT-ND1	ND1	NADH Dehydrogenase subunit 1	4216	COSM1138370,COSM1138371	T	C	C	305358	1.02164	0.00975335	0.0281782	NA
CVD	DM	UKB	MT-ND1	ND1	NADH Dehydrogenase subunit 1	4216	COSM1138370,COSM1138371	T	C	C	31791	1.03841	0.0291448	0.195925	NA
CVD	Overall	BiLEVE	MT-TQ	Q	tRNA glutamine	4336	rs41456348	T	C	C	40747	0.892404	0.0716465	0.11209	NA
CVD	noDM	BiLEVE	MT-TQ	Q	tRNA glutamine	4336	rs41456348	T	C	C	36173	0.917031	0.0759516	0.254128	NA
CVD	DM	BiLEVE	MT-TQ	Q	tRNA glutamine	4336	rs41456348	T	C	C	4574	0.725552	0.207142	0.121428	NA
CVD	Overall	UKB	MT-TQ	Q	tRNA glutamine	4336	rs41456348	T	C	C	337302	1.05054	0.0244096	0.0433846	NA
CVD	noDM	UKB	MT-TQ	Q	tRNA glutamine	4336	rs41456348	T	C	C	305502	1.0502	0.0257436	0.0570988	NA
CVD	DM	UKB	MT-TQ	Q	tRNA glutamine	4336	rs41456348	T	C	C	31800	1.05148	0.0769901	0.51438	NA
CVD	Overall	UKB	MT-ND2	ND2	NADH dehydrogenase subunit 2	4529	-	A	T	T	337514	0.952581	0.0215781	0.0243623	NA
CVD	noDM	UKB	MT-ND2	ND2	NADH dehydrogenase subunit 2	4529	-	A	T	T	305685	0.956356	0.0227826	0.0501439	NA
CVD	DM	UKB	MT-ND2	ND2	NADH dehydrogenase subunit 2	4529	-	A	T	T	31829	0.917597	0.0670779	0.199828	NA
CVD	Overall	BiLEVE	MT-ND2	ND2	NADH dehydrogenase subunit 2	4561	-	T	C	C	40808	0.971103	0.0974376	0.763462	NA
CVD	noDM	BiLEVE	MT-ND2	ND2	NADH dehydrogenase subunit 2	4561	-	T	C	C	36236	0.953344	0.102937	0.642529	NA
CVD	DM	BiLEVE	MT-ND2	ND2	NADH dehydrogenase subunit 2	4561	-	T	C	C	4572	1.12626	0.315206	0.706004	NA
CVD	Overall	UKB	MT-ND2	ND2	NADH dehydrogenase subunit 2	4561	-	T	C	C	337357	0.984111	0.0343817	0.641324	NA
CVD	noDM	UKB	MT-ND2	ND2	NADH dehydrogenase subunit 2	4561	-	T	C	C	305547	0.976483	0.0363662	0.512849	NA
CVD	DM	UKB	MT-ND2	ND2	NADH dehydrogenase subunit 2	4561	-	T	C	C	31810	1.05321	0.107255	0.628843	NA
CVD	Overall	BiLEVE	MT-ND2	ND2	NADH dehydrogenase subunit 2	4580	-	G	A	A	40697	1.01355	0.0598533	0.822063	NA
CVD	noDM	BiLEVE	MT-ND2	ND2	NADH dehydrogenase subunit 2	4580	-	G	A	A	36140	0.982996	0.064113	0.789087	NA
CVD	DM	BiLEVE	MT-ND2	ND2	NADH dehydrogenase subunit 2	4580	-	G	A	A	4557	1.28012	0.176693	0.162221	NA
CVD	Overall	UKB	MT-ND2	ND2	NADH dehydrogenase subunit 2	4580	-	G	A	A	336505	1.01542	0.020939	0.464898	NA
CVD	noDM	UKB	MT-ND2	ND2	NADH dehydrogenase subunit 2	4580	-	G	A	A	304780	1.01827	0.0221017	0.412762	NA
CVD	DM	UKB	MT-ND2	ND2	NADH dehydrogenase subunit 2	4580	-	G	A	A	31725	0.985337	0.0652919	0.821019	NA
CVD	Overall	BiLEVE	MT-ND2	ND2	NADH dehydrogenase subunit 2	4646	rs375312364	T	C	C	40818	0.921465	0.0726938	0.260532	NA
CVD	noDM	BiLEVE	MT-ND2	ND2	NADH dehydrogenase subunit 2	4646	rs375312364	T	C	C	36244	0.942285	0.0770468	0.440366	NA
CVD	DM	BiLEVE	MT-ND2	ND2	NADH dehydrogenase subunit 2	4646	rs375312364	T	C	C	4574	0.772474	0.212067	0.223475	NA
CVD	Overall	BiLEVE	MT-ND2	ND2	NADH dehydrogenase subunit 2	4769	rs3021086	G	A	A	40765	1.04745	0.0685285	0.498737	NA
CVD	noDM	BiLEVE	MT-ND2	ND2	NADH dehydrogenase subunit 2	4769	rs3021086	G	A	A	36198	1.02976	0.0730431	0.688086	NA
CVD	DM	BiLEVE	MT-ND2	ND2	NADH dehydrogenase subunit 2	4769	rs3021086	G	A	A	4567	1.15023	0.205067	0.494924	NA
CVD	Overall	UKB	MT-ND2	ND2	NADH dehydrogenase subunit 2	4769	rs3021086	G	A	A	337323	0.941254	0.024154	0.0121938	NA
CVD	noDM	UKB	MT-ND2	ND2	NADH dehydrogenase subunit 2	4769	rs3021086	G	A	A	305516	0.949003	0.0255386	0.0404074	NA
CVD	DM	UKB	MT-ND2	ND2	NADH dehydrogenase subunit 2	4769	rs3021086	G	A	A	31807	0.881894	0.0738312	0.088697	NA
CVD	Overall	BiLEVE	MT-ND2	ND2	NADH dehydrogenase subunit 2	4793	-	A	G	G	40780	1.11415	0.092769	0.243956	NA
CVD	noDM	BiLEVE	MT-ND2	ND2	NADH dehydrogenase subunit 2	4793	-	A	G	G	36211	1.04896	0.0985536	0.627691	NA
CVD	DM	BiLEVE	MT-ND2	ND2	NADH dehydrogenase subunit 2	4793	-	A	G	G	4569	2.0397	0.317487	0.0247588	NA
CVD	Overall	UKB	MT-ND2	ND2	NADH dehydrogenase subunit 2	4793	-	A	G	G	337327	1.00611	0.0326008	0.851755	NA
CVD	noDM	UKB	MT-ND2	ND2	NADH dehydrogenase subunit 2	4793	-	A	G	G	305514	1.00044	0.0344211	0.98976	NA
CVD	DM	UKB	MT-ND2	ND2	NADH dehydrogenase subunit 2	4793	-	A	G	G	31813	1.06034	0.102903	0.569087	NA
CVD	Overall	BiLEVE	MT-ND2	ND2	NADH dehydrogenase subunit 2	4917	rs28357980	A	G	G	40754	1.09077	0.0356568	0.0148249	NA
CVD	noDM	BiLEVE	MT-ND2	ND2	NADH dehydrogenase subunit 2	4917	rs28357980	A	G	G	36185	1.10365	0.0378144	0.00910454	NA
CVD	DM	BiLEVE	MT-ND2	ND2	NADH dehydrogenase subunit 2	4917	rs28357980	A	G	G	4569	0.997003	0.10599	0.977409	NA
CVD	Overall	UKB	MT-ND2	ND2	NADH dehydrogenase subunit 2	4917	rs28357980	A	G	G	337098	1.03805	0.0126356	0.00312053	NA
CVD	noDM	UKB	MT-ND2	ND2	NADH dehydrogenase subunit 2	4917	rs28357980	A	G	G	305308	1.03803	0.0133185	0.0050741	NA
CVD	DM	UKB	MT-ND2	ND2	NADH dehydrogenase subunit 2	4917	rs28357980	A	G	G	31790	1.03812	0.040054	0.35034	NA
CVD	Overall	BiLEVE	MT-ND2	ND2	NADH dehydrogenase subunit 2	5004	-	T	C	C	40796	1.02514	0.0744324	0.738718	NA
CVD	noDM	BiLEVE	MT-ND2	ND2	NADH dehydrogenase subunit 2	5004	-	T	C	C	36224	1.00819	0.0788266	0.917609	NA
CVD	DM	BiLEVE	MT-ND2	ND2	NADH dehydrogenase subunit 2	5004	-	T	C	C	4572	1.18246	0.23368	0.47324	NA
CVD	Overall	UKB	MT-ND2	ND2	NADH dehydrogenase subunit 2	5004	-	T	C	C	337389	0.99605	0.0265894	0.881661	NA
CVD	noDM	UKB	MT-ND2	ND2	NADH dehydrogenase subunit 2	5004	-	T	C	C	305568	1.01571	0.0279345	0.576905	NA
CVD	DM	UKB	MT-ND2	ND2	NADH dehydrogenase subunit 2	5004	-	T	C	C	31821	0.832446	0.0842436	0.0294905	NA
CVD	Overall	UKB	MT-ND2	ND2	NADH dehydrogenase subunit 2	5046	rs878927053	G	A	A	336911	1.00734	0.0270548	0.786827	NA
CVD	noDM	UKB	MT-ND2	ND2	NADH dehydrogenase subunit 2	5046	rs878927053	G	A	A	305135	0.989067	0.0286013	0.700717	NA
CVD	DM	UKB	MT-ND2	ND2	NADH dehydrogenase subunit 2	5046	rs878927053	G	A	A	31776	1.19891	0.0864454	0.0358516	NA
CVD	Overall	BiLEVE	MT-ND2	ND2	NADH dehydrogenase subunit 2	5147	rs367778601	G	A	A	40768	1.082	0.0451913	0.0811707	NA
CVD	noDM	BiLEVE	MT-ND2	ND2	NADH dehydrogenase subunit 2	5147	rs367778601	G	A	A	36200	1.10537	0.0477045	0.0357212	NA
CVD	DM	BiLEVE	MT-ND2	ND2	NADH dehydrogenase subunit 2	5147	rs367778601	G	A	A	4568	0.917971	0.137311	0.533068	NA
CVD	Overall	UKB	MT-ND2	ND2	NADH dehydrogenase subunit 2	5147	rs367778601	G	A	A	337322	1.04536	0.0161505	0.00602414	NA
CVD	noDM	UKB	MT-ND2	ND2	NADH dehydrogenase subunit 2	5147	rs367778601	G	A	A	305520	1.05112	0.0170043	0.00337088	NA
CVD	DM	UKB	MT-ND2	ND2	NADH dehydrogenase subunit 2	5147	rs367778601	G	A	A	31802	0.996678	0.0512625	0.94825	NA
CVD	Overall	UKB	MT-ND2	ND2	NADH dehydrogenase subunit 2	5390	rs41333444	A	G	G	337474	0.996596	0.035245	0.922922	NA
CVD	noDM	UKB	MT-ND2	ND2	NADH dehydrogenase subunit 2	5390	rs41333444	A	G	G	305656	0.989562	0.0372957	0.778439	NA
CVD	DM	UKB	MT-ND2	ND2	NADH dehydrogenase subunit 2	5390	rs41333444	A	G	G	31818	1.06226	0.10955	0.581398	NA
CVD	Overall	UKB	MT-ND2	ND2	NADH dehydrogenase subunit 2	5495	rs3020602	T	C	C	337106	0.930965	0.0303077	0.0182625	NA
CVD	noDM	UKB	MT-ND2	ND2	NADH dehydrogenase subunit 2	5495	rs3020602	T	C	C	305315	0.942953	0.0318234	0.0649252	NA
CVD	DM	UKB	MT-ND2	ND2	NADH dehydrogenase subunit 2	5495	rs3020602	T	C	C	31791	0.822352	0.0975595	0.0449854	NA
CVD	Overall	BiLEVE	MT-NC4	NC4	non-coding nucleotides	5656	-	A	G	G	40801	1.09013	0.093414	0.355603	NA
CVD	noDM	BiLEVE	MT-NC4	NC4	non-coding nucleotides	5656	-	A	G	G	36230	1.11362	0.0986862	0.27548	NA
CVD	DM	BiLEVE	MT-NC4	NC4	non-coding nucleotides	5656	-	A	G	G	4571	0.893401	0.280324	0.687606	NA
CVD	Overall	UKB	MT-NC4	NC4	non-coding nucleotides	5656	-	A	G	G	337403	0.93763	0.0342482	0.0600545	NA
CVD	noDM	UKB	MT-NC4	NC4	non-coding nucleotides	5656	-	A	G	G	305582	0.933777	0.0364896	0.0604177	NA
CVD	DM	UKB	MT-NC4	NC4	non-coding nucleotides	5656	-	A	G	G	31821	0.969581	0.100267	0.758009	NA
CVD	Overall	UKB	MT-CO1	COI	Cytochrome c oxidase subunit I	5999	rs879118820	T	C	C	337245	0.960641	0.0267917	0.133934	NA
CVD	noDM	UKB	MT-CO1	COI	Cytochrome c oxidase subunit I	5999	rs879118820	T	C	C	305442	0.953968	0.02835	0.0964637	NA
CVD	DM	UKB	MT-CO1	COI	Cytochrome c oxidase subunit I	5999	rs879118820	T	C	C	31803	1.01795	0.0831846	0.830624	NA
CVD	Overall	UKB	MT-CO1	COI	Cytochrome c oxidase subunit I	6047	rs879104796	A	G	G	337394	0.961937	0.0267099	0.14626	NA
CVD	noDM	UKB	MT-CO1	COI	Cytochrome c oxidase subunit I	6047	rs879104796	A	G	G	305584	0.954468	0.0282455	0.0989705	NA
CVD	DM	UKB	MT-CO1	COI	Cytochrome c oxidase subunit I	6047	rs879104796	A	G	G	31810	1.03082	0.0835181	0.716295	NA
CVD	Overall	UKB	MT-CO1	COI	Cytochrome c oxidase subunit I	6221	rs370472320	T	C	C	337247	0.991928	0.0310189	0.793876	NA
CVD	noDM	UKB	MT-CO1	COI	Cytochrome c oxidase subunit I	6221	rs370472320	T	C	C	305447	0.999495	0.0326004	0.987649	NA
CVD	DM	UKB	MT-CO1	COI	Cytochrome c oxidase subunit I	6221	rs370472320	T	C	C	31800	0.919079	0.0995222	0.396501	NA
CVD	Overall	BiLEVE	MT-CO1	COI	Cytochrome c oxidase subunit I	6371	rs878870695	C	T	T	40766	0.934466	0.0920445	0.461496	NA
CVD	noDM	BiLEVE	MT-CO1	COI	Cytochrome c oxidase subunit I	6371	rs878870695	C	T	T	36196	0.912685	0.0971224	0.346851	NA
CVD	DM	BiLEVE	MT-CO1	COI	Cytochrome c oxidase subunit I	6371	rs878870695	C	T	T	4570	1.17918	0.305278	0.589276	NA
CVD	Overall	UKB	MT-CO1	COI	Cytochrome c oxidase subunit I	6371	rs878870695	C	T	T	337027	0.992205	0.0323539	0.808884	NA
CVD	noDM	UKB	MT-CO1	COI	Cytochrome c oxidase subunit I	6371	rs878870695	C	T	T	305246	1.00241	0.0339784	0.943421	NA
CVD	DM	UKB	MT-CO1	COI	Cytochrome c oxidase subunit I	6371	rs878870695	C	T	T	31781	0.895085	0.103977	0.286439	NA
CVD	Overall	BiLEVE	MT-CO1	COI	Cytochrome c oxidase subunit I	6734	-	G	A	A	40659	0.988487	0.106048	0.913047	NA
CVD	noDM	BiLEVE	MT-CO1	COI	Cytochrome c oxidase subunit I	6734	-	G	A	A	36104	1.05086	0.112651	0.659691	NA
CVD	DM	BiLEVE	MT-CO1	COI	Cytochrome c oxidase subunit I	6734	-	G	A	A	4555	0.646251	0.292587	0.135675	NA
CVD	Overall	UKB	MT-CO1	COI	Cytochrome c oxidase subunit I	6734	-	G	A	A	336634	0.955461	0.0372665	0.22149	NA
CVD	noDM	UKB	MT-CO1	COI	Cytochrome c oxidase subunit I	6734	-	G	A	A	304905	0.968318	0.0393974	0.413828	NA
CVD	DM	UKB	MT-CO1	COI	Cytochrome c oxidase subunit I	6734	-	G	A	A	31729	0.846536	0.113005	0.140403	NA
CVD	Overall	BiLEVE	MT-CO1	COI	Cytochrome c oxidase subunit I	6776	-	T	C	C	40786	0.999112	0.0478747	0.985199	NA
CVD	noDM	BiLEVE	MT-CO1	COI	Cytochrome c oxidase subunit I	6776	-	T	C	C	36215	1.01566	0.0508168	0.759737	NA
CVD	DM	BiLEVE	MT-CO1	COI	Cytochrome c oxidase subunit I	6776	-	T	C	C	4571	0.885517	0.140362	0.386372	NA
CVD	Overall	UKB	MT-CO1	COI	Cytochrome c oxidase subunit I	6776	-	T	C	C	337186	0.995442	0.0168535	0.786359	NA
CVD	noDM	UKB	MT-CO1	COI	Cytochrome c oxidase subunit I	6776	-	T	C	C	305387	0.996878	0.0177876	0.860459	NA
CVD	DM	UKB	MT-CO1	COI	Cytochrome c oxidase subunit I	6776	-	T	C	C	31799	0.985457	0.0527554	0.781242	NA
CVD	Overall	BiLEVE	MT-CO1	COI	Cytochrome c oxidase subunit I	7028	-	T	C	C	40789	1.00047	0.0216267	0.982582	NA
CVD	noDM	BiLEVE	MT-CO1	COI	Cytochrome c oxidase subunit I	7028	-	T	C	C	36220	0.996701	0.0229881	0.88569	NA
CVD	DM	BiLEVE	MT-CO1	COI	Cytochrome c oxidase subunit I	7028	-	T	C	C	4569	1.03062	0.0641568	0.638296	NA
CVD	Overall	UKB	MT-CO1	COI	Cytochrome c oxidase subunit I	7028	-	T	C	C	337247	0.997701	0.00762626	0.762793	NA
CVD	noDM	UKB	MT-CO1	COI	Cytochrome c oxidase subunit I	7028	-	T	C	C	305442	0.998704	0.00804537	0.871961	NA
CVD	DM	UKB	MT-CO1	COI	Cytochrome c oxidase subunit I	7028	-	T	C	C	31805	0.98989	0.0240008	0.672014	NA
CVD	Overall	BiLEVE	MT-TS1	S(UCN)	tRNA serine 1	7476	rs201950015	C	T	T	40802	0.88278	0.0780778	0.110296	NA
CVD	noDM	BiLEVE	MT-TS1	S(UCN)	tRNA serine 1	7476	rs201950015	C	T	T	36228	0.902972	0.083203	0.219942	NA
CVD	DM	BiLEVE	MT-TS1	S(UCN)	tRNA serine 1	7476	rs201950015	C	T	T	4574	0.757164	0.221333	0.208819	NA
CVD	Overall	UKB	MT-TS1	S(UCN)	tRNA serine 1	7476	rs201950015	C	T	T	337475	1.013	0.0280511	0.645166	NA
CVD	noDM	UKB	MT-TS1	S(UCN)	tRNA serine 1	7476	rs201950015	C	T	T	305654	1.01652	0.0295136	0.578772	NA
CVD	DM	UKB	MT-TS1	S(UCN)	tRNA serine 1	7476	rs201950015	C	T	T	31821	0.975795	0.0899131	0.785222	NA
CVD	Overall	BiLEVE	MT-CO2	COII	Cytochrome c oxidase subunit II	7768	rs41534044	A	G	G	40813	1.02158	0.0531788	0.688046	NA
CVD	noDM	BiLEVE	MT-CO2	COII	Cytochrome c oxidase subunit II	7768	rs41534044	A	G	G	36239	1.04363	0.056342	0.448458	NA
CVD	DM	BiLEVE	MT-CO2	COII	Cytochrome c oxidase subunit II	7768	rs41534044	A	G	G	4574	0.859758	0.156435	0.334083	NA
CVD	Overall	UKB	MT-CO2	COII	Cytochrome c oxidase subunit II	7768	rs41534044	A	G	G	337473	0.974472	0.0190383	0.174381	NA
CVD	noDM	UKB	MT-CO2	COII	Cytochrome c oxidase subunit II	7768	rs41534044	A	G	G	305650	0.973987	0.0201349	0.190514	NA
CVD	DM	UKB	MT-CO2	COII	Cytochrome c oxidase subunit II	7768	rs41534044	A	G	G	31823	0.980906	0.0587053	0.742607	NA
CVD	Overall	BiLEVE	MT-CO2	COII	Cytochrome c oxidase subunit II	8251	rs3021089	G	A	A	40784	0.965013	0.0464268	0.443029	NA
CVD	noDM	BiLEVE	MT-CO2	COII	Cytochrome c oxidase subunit II	8251	rs3021089	G	A	A	36211	0.982143	0.0492366	0.714395	NA
CVD	DM	BiLEVE	MT-CO2	COII	Cytochrome c oxidase subunit II	8251	rs3021089	G	A	A	4573	0.843464	0.136419	0.212066	NA
CVD	Overall	BiLEVE	MT-CO2	COII	Cytochrome c oxidase subunit II	8269	-	G	A	A	40775	0.970034	0.0597451	0.610594	NA
CVD	noDM	BiLEVE	MT-CO2	COII	Cytochrome c oxidase subunit II	8269	-	G	A	A	36205	0.943079	0.0637713	0.358096	NA
CVD	DM	BiLEVE	MT-CO2	COII	Cytochrome c oxidase subunit II	8269	-	G	A	A	4570	1.22263	0.179869	0.263772	NA
CVD	Overall	UKB	MT-CO2	COII	Cytochrome c oxidase subunit II	8269	-	G	A	A	336856	1.02005	0.0213055	0.351549	NA
CVD	noDM	UKB	MT-CO2	COII	Cytochrome c oxidase subunit II	8269	-	G	A	A	305097	1.03082	0.0224019	0.175457	NA
CVD	DM	UKB	MT-CO2	COII	Cytochrome c oxidase subunit II	8269	-	G	A	A	31759	0.919694	0.0678921	0.217555	NA
CVD	Overall	UKB	MT-ATP8	ATPase8	ATP synthase F0 subunit 8	8448	rs879056797	T	C	C	337521	1.04182	0.0338457	0.226064	NA
CVD	noDM	UKB	MT-ATP8	ATPase8	ATP synthase F0 subunit 8	8448	rs879056797	T	C	C	305693	1.04686	0.0355823	0.198113	NA
CVD	DM	UKB	MT-ATP8	ATPase8	ATP synthase F0 subunit 8	8448	rs879056797	T	C	C	31828	1.00008	0.108814	0.999437	NA
CVD	Overall	BiLEVE	MT-ATP6	ATPase6	ATP synthase F0 subunit 6	8697	rs879233543	G	A	A	40752	1.07922	0.0356107	0.0322799	NA
CVD	noDM	BiLEVE	MT-ATP6	ATPase6	ATP synthase F0 subunit 6	8697	rs879233543	G	A	A	36185	1.09157	0.0377709	0.0203577	NA
CVD	DM	BiLEVE	MT-ATP6	ATPase6	ATP synthase F0 subunit 6	8697	rs879233543	G	A	A	4567	0.988789	0.105748	0.915098	NA
CVD	Overall	UKB	MT-ATP6	ATPase6	ATP synthase F0 subunit 6	8697	rs879233543	G	A	A	337150	1.04273	0.012616	0.000911659	NONE
CVD	noDM	UKB	MT-ATP6	ATPase6	ATP synthase F0 subunit 6	8697	rs879233543	G	A	A	305361	1.04337	0.0132957	0.00140662	NA
CVD	DM	UKB	MT-ATP6	ATPase6	ATP synthase F0 subunit 6	8697	rs879233543	G	A	A	31789	1.03652	0.0400125	0.370006	NA
CVD	Overall	BiLEVE	MT-ATP6	ATPase6	ATP synthase F0 subunit 6	8994	rs28358887,COSM6716156,COSM6716157	G	A	A	40637	1.00517	0.072967	0.943641	NA
CVD	noDM	BiLEVE	MT-ATP6	ATPase6	ATP synthase F0 subunit 6	8994	rs28358887,COSM6716156,COSM6716157	G	A	A	36083	1.02794	0.0781515	0.724365	NA
CVD	DM	BiLEVE	MT-ATP6	ATPase6	ATP synthase F0 subunit 6	8994	rs28358887,COSM6716156,COSM6716157	G	A	A	4554	0.856296	0.198389	0.434219	NA
CVD	Overall	UKB	MT-ATP6	ATPase6	ATP synthase F0 subunit 6	8994	rs28358887,COSM6716156,COSM6716157	G	A	A	337466	1.02166	0.025369	0.398191	NA
CVD	noDM	UKB	MT-ATP6	ATPase6	ATP synthase F0 subunit 6	8994	rs28358887,COSM6716156,COSM6716157	G	A	A	305650	1.00802	0.0268048	0.765783	NA
CVD	DM	UKB	MT-ATP6	ATPase6	ATP synthase F0 subunit 6	8994	rs28358887,COSM6716156,COSM6716157	G	A	A	31816	1.16111	0.0806573	0.0640292	NA
CVD	Overall	BiLEVE	MT-ATP6	ATPase6	ATP synthase F0 subunit 6	9055	rs193303045	G	A	A	40771	1.01115	0.0374369	0.767055	NA
CVD	noDM	BiLEVE	MT-ATP6	ATPase6	ATP synthase F0 subunit 6	9055	rs193303045	G	A	A	36201	1.0147	0.039595	0.712457	NA
CVD	DM	BiLEVE	MT-ATP6	ATPase6	ATP synthase F0 subunit 6	9055	rs193303045	G	A	A	4570	0.978202	0.115013	0.848035	NA
CVD	Overall	UKB	MT-ATP6	ATPase6	ATP synthase F0 subunit 6	9055	rs193303045	G	A	A	336893	1.01979	0.0132059	0.137803	NA
CVD	noDM	UKB	MT-ATP6	ATPase6	ATP synthase F0 subunit 6	9055	rs193303045	G	A	A	305137	1.02174	0.013913	0.122114	NA
CVD	DM	UKB	MT-ATP6	ATPase6	ATP synthase F0 subunit 6	9055	rs193303045	G	A	A	31756	1.00298	0.0419285	0.943407	NA
CVD	Overall	UKB	MT-ATP6	ATPase6	ATP synthase F0 subunit 6	9123	COSM1155692,COSM1155693	G	A	A	337261	0.979549	0.0271187	0.446086	NA
CVD	noDM	UKB	MT-ATP6	ATPase6	ATP synthase F0 subunit 6	9123	COSM1155692,COSM1155693	G	A	A	305454	1.00092	0.0284838	0.97424	NA
CVD	DM	UKB	MT-ATP6	ATPase6	ATP synthase F0 subunit 6	9123	COSM1155692,COSM1155693	G	A	A	31807	0.803136	0.0858655	0.010674	NA
CVD	Overall	BiLEVE	MT-CO3	COIII	Cytochrome c oxidase subunit III	9477	rs2853825	G	A	A	40791	0.990062	0.0370923	0.78773	NA
CVD	noDM	BiLEVE	MT-CO3	COIII	Cytochrome c oxidase subunit III	9477	rs2853825	G	A	A	36221	1.00521	0.0394318	0.895056	NA
CVD	DM	BiLEVE	MT-CO3	COIII	Cytochrome c oxidase subunit III	9477	rs2853825	G	A	A	4570	0.889942	0.10773	0.279107	NA
CVD	Overall	UKB	MT-CO3	COIII	Cytochrome c oxidase subunit III	9667	rs41482146	A	G	G	337231	0.904163	0.0344533	0.00345442	NA
CVD	noDM	UKB	MT-CO3	COIII	Cytochrome c oxidase subunit III	9667	rs41482146	A	G	G	305423	0.922616	0.0363323	0.0266356	NA
CVD	DM	UKB	MT-CO3	COIII	Cytochrome c oxidase subunit III	9667	rs41482146	A	G	G	31808	0.763511	0.105509	0.0105463	NA
CVD	Overall	BiLEVE	MT-CO3	COIII	Cytochrome c oxidase subunit III	9698	-	T	C	C	40678	1.029	0.0384111	0.456767	NA
CVD	noDM	BiLEVE	MT-CO3	COIII	Cytochrome c oxidase subunit III	9698	-	T	C	C	36119	1.03223	0.0405834	0.434444	NA
CVD	DM	BiLEVE	MT-CO3	COIII	Cytochrome c oxidase subunit III	9698	-	T	C	C	4559	0.995716	0.118984	0.971214	NA
CVD	Overall	UKB	MT-CO3	COIII	Cytochrome c oxidase subunit III	9698	-	T	C	C	336487	1.01087	0.0135154	0.423733	NA
CVD	noDM	UKB	MT-CO3	COIII	Cytochrome c oxidase subunit III	9698	-	T	C	C	304772	1.01292	0.0142398	0.3675	NA
CVD	DM	UKB	MT-CO3	COIII	Cytochrome c oxidase subunit III	9698	-	T	C	C	31715	0.992883	0.0428863	0.867728	NA
CVD	Overall	BiLEVE	MT-CO3	COIII	Cytochrome c oxidase subunit III	9716	rs41502750	T	C	C	40810	0.901913	0.0872084	0.236495	NA
CVD	noDM	BiLEVE	MT-CO3	COIII	Cytochrome c oxidase subunit III	9716	rs41502750	T	C	C	36235	0.881663	0.0930787	0.176022	NA
CVD	DM	BiLEVE	MT-CO3	COIII	Cytochrome c oxidase subunit III	9716	rs41502750	T	C	C	4575	1.07032	0.262331	0.79559	NA
CVD	Overall	UKB	MT-CO3	COIII	Cytochrome c oxidase subunit III	9716	rs41502750	T	C	C	337447	0.957456	0.0307395	0.157269	NA
CVD	noDM	UKB	MT-CO3	COIII	Cytochrome c oxidase subunit III	9716	rs41502750	T	C	C	305627	0.952783	0.0325245	0.136978	NA
CVD	DM	UKB	MT-CO3	COIII	Cytochrome c oxidase subunit III	9716	rs41502750	T	C	C	31820	0.999677	0.0950766	0.997291	NA
CVD	Overall	UKB	MT-CO3	COIII	Cytochrome c oxidase subunit III	9899	rs41345446	T	C	C	337386	0.996637	0.0287869	0.906848	NA
CVD	noDM	UKB	MT-CO3	COIII	Cytochrome c oxidase subunit III	9899	rs41345446	T	C	C	305577	0.990685	0.0304145	0.758309	NA
CVD	DM	UKB	MT-CO3	COIII	Cytochrome c oxidase subunit III	9899	rs41345446	T	C	C	31809	1.04423	0.0904333	0.632229	NA
CVD	Overall	BiLEVE	MT-ND3	ND3	NADH dehydrogenase subunit 3	10238	-	T	C	C	40692	0.945803	0.059157	0.346239	NA
CVD	noDM	BiLEVE	MT-ND3	ND3	NADH dehydrogenase subunit 3	10238	-	T	C	C	36136	0.95046	0.0625382	0.416535	NA
CVD	DM	BiLEVE	MT-ND3	ND3	NADH dehydrogenase subunit 3	10238	-	T	C	C	4556	0.903792	0.181648	0.577608	NA
CVD	Overall	UKB	MT-ND3	ND3	NADH dehydrogenase subunit 3	10238	-	T	C	C	336977	0.951366	0.0207758	0.0164057	NA
CVD	noDM	UKB	MT-ND3	ND3	NADH dehydrogenase subunit 3	10238	-	T	C	C	305195	0.95615	0.0219196	0.0407892	NA
CVD	DM	UKB	MT-ND3	ND3	NADH dehydrogenase subunit 3	10238	-	T	C	C	31782	0.908304	0.0648699	0.138181	NA
CVD	Overall	BiLEVE	MT-ND3	ND3	NADH dehydrogenase subunit 3	10398	rs2853826	A	G	G	40648	0.977005	0.0263384	0.377109	NA
CVD	noDM	BiLEVE	MT-ND3	ND3	NADH dehydrogenase subunit 3	10398	rs2853826	A	G	G	36097	0.976549	0.0279386	0.395678	NA
CVD	DM	BiLEVE	MT-ND3	ND3	NADH dehydrogenase subunit 3	10398	rs2853826	A	G	G	4551	0.980849	0.0794423	0.80769	NA
CVD	Overall	UKB	MT-ND3	ND3	NADH dehydrogenase subunit 3	10398	rs2853826	A	G	G	336023	1.00022	0.00931943	0.980934	NA
CVD	noDM	UKB	MT-ND3	ND3	NADH dehydrogenase subunit 3	10398	rs2853826	A	G	G	304348	0.999774	0.00983173	0.981685	NA
CVD	DM	UKB	MT-ND3	ND3	NADH dehydrogenase subunit 3	10398	rs2853826	A	G	G	31675	1.00245	0.0293454	0.933532	NA
CVD	Overall	UKB	MT-ND3	ND3	NADH dehydrogenase subunit 3	10400	rs28358278	C	T	T	337373	0.860727	0.098512	0.1279	NA
CVD	noDM	UKB	MT-ND3	ND3	NADH dehydrogenase subunit 3	10400	rs28358278	C	T	T	305555	0.807682	0.105496	0.0429079	NA
CVD	DM	UKB	MT-ND3	ND3	NADH dehydrogenase subunit 3	10400	rs28358278	C	T	T	31818	1.4961	0.315338	0.201406	NA
CVD	Overall	BiLEVE	MT-TR	R	tRNA arginine	10463	rs28358279	T	C	C	40699	1.07518	0.0345405	0.0358538	NA
CVD	noDM	BiLEVE	MT-TR	R	tRNA arginine	10463	rs28358279	T	C	C	36134	1.08493	0.0366099	0.0259697	NA
CVD	DM	BiLEVE	MT-TR	R	tRNA arginine	10463	rs28358279	T	C	C	4565	1.0018	0.103433	0.986135	NA
CVD	Overall	UKB	MT-TR	R	tRNA arginine	10463	rs28358279	T	C	C	336633	1.04131	0.0122757	0.000975991	Affx-79381685(1)
CVD	noDM	UKB	MT-TR	R	tRNA arginine	10463	rs28358279	T	C	C	304880	1.04079	0.0129394	0.00200245	NA
CVD	DM	UKB	MT-TR	R	tRNA arginine	10463	rs28358279	T	C	C	31753	1.04591	0.0389387	0.248973	NA
CVD	Overall	BiLEVE	MT-ND4L	ND4L	NADH dehydrogenase subunit 4L	10550	rs28358280	A	G	G	40802	1.01309	0.0383442	0.734479	NA
CVD	noDM	BiLEVE	MT-ND4L	ND4L	NADH dehydrogenase subunit 4L	10550	rs28358280	A	G	G	36228	1.01591	0.0405408	0.696956	NA
CVD	DM	BiLEVE	MT-ND4L	ND4L	NADH dehydrogenase subunit 4L	10550	rs28358280	A	G	G	4574	0.986808	0.118192	0.910541	NA
CVD	Overall	UKB	MT-ND4L	ND4L	NADH dehydrogenase subunit 4L	10550	rs28358280	A	G	G	337428	1.01371	0.013515	0.313696	NA
CVD	noDM	UKB	MT-ND4L	ND4L	NADH dehydrogenase subunit 4L	10550	rs28358280	A	G	G	305621	1.01618	0.01424	0.259782	NA
CVD	DM	UKB	MT-ND4L	ND4L	NADH dehydrogenase subunit 4L	10550	rs28358280	A	G	G	31807	0.992402	0.0428374	0.858694	NA
CVD	Overall	UKB	MT-ND4	ND4	NADH dehydrogenase subunit 4	10819	rs28358283	A	G	G	337414	0.9358	0.0443445	0.134571	NA
CVD	noDM	UKB	MT-ND4	ND4	NADH dehydrogenase subunit 4	10819	rs28358283	A	G	G	305586	0.927154	0.0468869	0.106713	NA
CVD	DM	UKB	MT-ND4	ND4	NADH dehydrogenase subunit 4	10819	rs28358283	A	G	G	31828	1.00981	0.139344	0.94415	NA
CVD	Overall	UKB	MT-ND4	ND4	NADH dehydrogenase subunit 4	10873	rs2857284	T	C	C	337228	0.941615	0.0617612	0.330034	NA
CVD	noDM	UKB	MT-ND4	ND4	NADH dehydrogenase subunit 4	10873	rs2857284	T	C	C	305424	0.901868	0.0658482	0.11675	NA
CVD	DM	UKB	MT-ND4	ND4	NADH dehydrogenase subunit 4	10873	rs2857284	T	C	C	31804	1.35985	0.19425	0.113567	NA
CVD	Overall	UKB	MT-ND4	ND4	NADH dehydrogenase subunit 4	10915	rs2857285	T	C	C	337291	0.966554	0.0345529	0.324865	NA
CVD	noDM	UKB	MT-ND4	ND4	NADH dehydrogenase subunit 4	10915	rs2857285	T	C	C	305484	0.968667	0.03652	0.38338	NA
CVD	DM	UKB	MT-ND4	ND4	NADH dehydrogenase subunit 4	10915	rs2857285	T	C	C	31807	0.942439	0.106777	0.578748	NA
CVD	Overall	BiLEVE	MT-ND4	ND4	NADH dehydrogenase subunit 4	11251	rs869096886,COSM1138232	A	G	G	40708	1.01991	0.0262499	0.452591	NA
CVD	noDM	BiLEVE	MT-ND4	ND4	NADH dehydrogenase subunit 4	11251	rs869096886,COSM1138232	A	G	G	36146	1.02008	0.0278978	0.475969	NA
CVD	DM	BiLEVE	MT-ND4	ND4	NADH dehydrogenase subunit 4	11251	rs869096886,COSM1138232	A	G	G	4562	1.01888	0.0779882	0.810486	NA
CVD	Overall	UKB	MT-ND4	ND4	NADH dehydrogenase subunit 4	11251	rs869096886,COSM1138232	A	G	G	336649	1.02475	0.00931342	0.00866812	NA
CVD	noDM	UKB	MT-ND4	ND4	NADH dehydrogenase subunit 4	11251	rs869096886,COSM1138232	A	G	G	304898	1.0226	0.00982626	0.0229551	NA
CVD	DM	UKB	MT-ND4	ND4	NADH dehydrogenase subunit 4	11251	rs869096886,COSM1138232	A	G	G	31751	1.04246	0.0293488	0.156565	NA
CVD	Overall	BiLEVE	MT-ND4	ND4	NADH dehydrogenase subunit 4	11299	rs28358285	T	C	C	40802	1.00982	0.038235	0.798306	NA
CVD	noDM	BiLEVE	MT-ND4	ND4	NADH dehydrogenase subunit 4	11299	rs28358285	T	C	C	36233	1.01418	0.0404186	0.727538	NA
CVD	DM	BiLEVE	MT-ND4	ND4	NADH dehydrogenase subunit 4	11299	rs28358285	T	C	C	4569	0.971959	0.117778	0.809182	NA
CVD	Overall	UKB	MT-ND4	ND4	NADH dehydrogenase subunit 4	11299	rs28358285	T	C	C	337413	1.01284	0.0134779	0.343763	NA
CVD	noDM	UKB	MT-ND4	ND4	NADH dehydrogenase subunit 4	11299	rs28358285	T	C	C	305600	1.01466	0.0142028	0.305523	NA
CVD	DM	UKB	MT-ND4	ND4	NADH dehydrogenase subunit 4	11299	rs28358285	T	C	C	31813	0.997101	0.0427067	0.945797	NA
CVD	Overall	UKB	MT-ND4	ND4	NADH dehydrogenase subunit 4	11332	rs55714831	C	T	T	337436	0.965123	0.0266556	0.182933	NA
CVD	noDM	UKB	MT-ND4	ND4	NADH dehydrogenase subunit 4	11332	rs55714831	C	T	T	305623	0.956661	0.0281819	0.115912	NA
CVD	DM	UKB	MT-ND4	ND4	NADH dehydrogenase subunit 4	11332	rs55714831	C	T	T	31813	1.04389	0.0836585	0.607659	NA
CVD	Overall	BiLEVE	MT-ND4	ND4	NADH dehydrogenase subunit 4	11377	rs193302938	G	A	A	40760	0.942507	0.0811727	0.465722	NA
CVD	noDM	BiLEVE	MT-ND4	ND4	NADH dehydrogenase subunit 4	11377	rs193302938	G	A	A	36198	0.936641	0.0866666	0.450097	NA
CVD	DM	BiLEVE	MT-ND4	ND4	NADH dehydrogenase subunit 4	11377	rs193302938	G	A	A	4562	0.995674	0.235887	0.985337	NA
CVD	Overall	UKB	MT-ND4	ND4	NADH dehydrogenase subunit 4	11377	rs193302938	G	A	A	336834	1.0199	0.0286015	0.490851	NA
CVD	noDM	UKB	MT-ND4	ND4	NADH dehydrogenase subunit 4	11377	rs193302938	G	A	A	305062	1.03116	0.0300632	0.307408	NA
CVD	DM	UKB	MT-ND4	ND4	NADH dehydrogenase subunit 4	11377	rs193302938	G	A	A	31772	0.921973	0.0912395	0.373251	NA
CVD	Overall	BiLEVE	MT-ND4	ND4	NADH dehydrogenase subunit 4	11467	rs2853493,COSM6716752,COSM6716753	A	G	G	40721	0.997226	0.0257955	0.914241	NA
CVD	noDM	BiLEVE	MT-ND4	ND4	NADH dehydrogenase subunit 4	11467	rs2853493,COSM6716752,COSM6716753	A	G	G	36157	1.00905	0.027372	0.741998	NA
CVD	DM	BiLEVE	MT-ND4	ND4	NADH dehydrogenase subunit 4	11467	rs2853493,COSM6716752,COSM6716753	A	G	G	4564	0.909616	0.0766069	0.216234	NA
CVD	Overall	UKB	MT-ND4	ND4	NADH dehydrogenase subunit 4	11467	rs2853493,COSM6716752,COSM6716753	A	G	G	336776	0.978053	0.00910648	0.0148159	NA
CVD	noDM	UKB	MT-ND4	ND4	NADH dehydrogenase subunit 4	11467	rs2853493,COSM6716752,COSM6716753	A	G	G	305019	0.977787	0.00961006	0.0194127	NA
CVD	DM	UKB	MT-ND4	ND4	NADH dehydrogenase subunit 4	11467	rs2853493,COSM6716752,COSM6716753	A	G	G	31757	0.981141	0.0285922	0.505486	NA
CVD	Overall	BiLEVE	MT-ND4	ND4	NADH dehydrogenase subunit 4	11485	-	T	C	C	40775	1.01355	0.0757251	0.858914	NA
CVD	noDM	BiLEVE	MT-ND4	ND4	NADH dehydrogenase subunit 4	11485	-	T	C	C	36202	1.07364	0.0804075	0.376868	NA
CVD	DM	BiLEVE	MT-ND4	ND4	NADH dehydrogenase subunit 4	11485	-	T	C	C	4573	0.669403	0.210255	0.0562667	NA
CVD	Overall	BiLEVE	MT-ND4	ND4	NADH dehydrogenase subunit 4	11674	rs28358286	C	T	T	40795	1.03191	0.0774877	0.68524	NA
CVD	noDM	BiLEVE	MT-ND4	ND4	NADH dehydrogenase subunit 4	11674	rs28358286	C	T	T	36224	1.0637	0.0825686	0.454507	NA
CVD	DM	BiLEVE	MT-ND4	ND4	NADH dehydrogenase subunit 4	11674	rs28358286	C	T	T	4571	0.835289	0.216745	0.406331	NA
CVD	Overall	UKB	MT-ND4	ND4	NADH dehydrogenase subunit 4	11674	rs28358286	C	T	T	337518	1.01599	0.0269355	0.555975	NA
CVD	noDM	UKB	MT-ND4	ND4	NADH dehydrogenase subunit 4	11674	rs28358286	C	T	T	305688	1.00059	0.0284548	0.983484	NA
CVD	DM	UKB	MT-ND4	ND4	NADH dehydrogenase subunit 4	11674	rs28358286	C	T	T	31830	1.17602	0.0861147	0.0597323	NA
CVD	Overall	BiLEVE	MT-ND4	ND4	NADH dehydrogenase subunit 4	11719	rs2853495	A	G	G	40770	1.00272	0.0214695	0.899497	NA
CVD	noDM	BiLEVE	MT-ND4	ND4	NADH dehydrogenase subunit 4	11719	rs2853495	A	G	G	36202	0.993112	0.0228208	0.761986	NA
CVD	DM	BiLEVE	MT-ND4	ND4	NADH dehydrogenase subunit 4	11719	rs2853495	A	G	G	4568	1.0805	0.0637111	0.224299	NA
CVD	Overall	BiLEVE	MT-ND4	ND4	NADH dehydrogenase subunit 4	11812	rs3088053	A	G	G	40776	1.08988	0.0390023	0.0273339	NA
CVD	noDM	BiLEVE	MT-ND4	ND4	NADH dehydrogenase subunit 4	11812	rs3088053	A	G	G	36205	1.087	0.0413506	0.0436517	NA
CVD	DM	BiLEVE	MT-ND4	ND4	NADH dehydrogenase subunit 4	11812	rs3088053	A	G	G	4571	1.12461	0.118594	0.322049	NA
CVD	Overall	UKB	MT-ND4	ND4	NADH dehydrogenase subunit 4	11812	rs3088053	A	G	G	337289	1.04936	0.0138834	0.000519901	Affx-34461623(1)
CVD	noDM	UKB	MT-ND4	ND4	NADH dehydrogenase subunit 4	11812	rs3088053	A	G	G	305484	1.05021	0.0146254	0.000809944	Affx-34461623(1)
CVD	DM	UKB	MT-ND4	ND4	NADH dehydrogenase subunit 4	11812	rs3088053	A	G	G	31805	1.04308	0.0441702	0.339611	NA
CVD	Overall	UKB	MT-ND4	ND4	NADH dehydrogenase subunit 4	11914	rs2853496,COSM1155517	G	A	A	336670	1.03318	0.0285229	0.252465	NA
CVD	noDM	UKB	MT-ND4	ND4	NADH dehydrogenase subunit 4	11914	rs2853496,COSM1155517	G	A	A	304929	1.04659	0.0299747	0.12871	NA
CVD	DM	UKB	MT-ND4	ND4	NADH dehydrogenase subunit 4	11914	rs2853496,COSM1155517	G	A	A	31741	0.923937	0.0910234	0.384777	NA
CVD	Overall	UKB	MT-ND4	ND4	NADH dehydrogenase subunit 4	11947	rs28359168	A	G	G	337413	1.01656	0.0274669	0.549874	NA
CVD	noDM	UKB	MT-ND4	ND4	NADH dehydrogenase subunit 4	11947	rs28359168	A	G	G	305594	0.999988	0.0290363	0.999673	NA
CVD	DM	UKB	MT-ND4	ND4	NADH dehydrogenase subunit 4	11947	rs28359168	A	G	G	31819	1.18683	0.0874749	0.0502133	NA
CVD	Overall	BiLEVE	MT-TL2	L(CUN)	tRNA leucine2	12308	rs2853498	A	G	G	40803	0.993176	0.0257268	0.790113	NA
CVD	noDM	BiLEVE	MT-TL2	L(CUN)	tRNA leucine2	12308	rs2853498	A	G	G	36229	1.00577	0.0272989	0.833197	NA
CVD	DM	BiLEVE	MT-TL2	L(CUN)	tRNA leucine2	12308	rs2853498	A	G	G	4574	0.899889	0.0763631	0.167173	NA
CVD	Overall	BiLEVE	MT-ND5	ND5	NADH dehydrogenase subunit 5	12372	rs2853499	G	A	A	40781	0.995793	0.0257107	0.869737	NA
CVD	noDM	BiLEVE	MT-ND5	ND5	NADH dehydrogenase subunit 5	12372	rs2853499	G	A	A	36207	1.00902	0.0272802	0.742003	NA
CVD	DM	BiLEVE	MT-ND5	ND5	NADH dehydrogenase subunit 5	12372	rs2853499	G	A	A	4574	0.898208	0.0763042	0.159452	NA
CVD	Overall	UKB	MT-ND5	ND5	NADH dehydrogenase subunit 5	12372	rs2853499	G	A	A	337192	0.980757	0.00908154	0.0323939	NA
CVD	noDM	UKB	MT-ND5	ND5	NADH dehydrogenase subunit 5	12372	rs2853499	G	A	A	305399	0.980906	0.00958194	0.0442256	NA
CVD	DM	UKB	MT-ND5	ND5	NADH dehydrogenase subunit 5	12372	rs2853499	G	A	A	31793	0.980166	0.0285476	0.48284	NA
CVD	Overall	BiLEVE	MT-ND5	ND5	NADH dehydrogenase subunit 5	12501	rs28397767	G	A	A	40795	0.936006	0.0582068	0.255878	NA
CVD	noDM	BiLEVE	MT-ND5	ND5	NADH dehydrogenase subunit 5	12501	rs28397767	G	A	A	36225	0.937015	0.0616138	0.291031	NA
CVD	DM	BiLEVE	MT-ND5	ND5	NADH dehydrogenase subunit 5	12501	rs28397767	G	A	A	4570	0.922987	0.17804	0.652622	NA
CVD	Overall	UKB	MT-ND5	ND5	NADH dehydrogenase subunit 5	12501	rs28397767	G	A	A	337120	0.955428	0.0204708	0.025922	NA
CVD	noDM	UKB	MT-ND5	ND5	NADH dehydrogenase subunit 5	12501	rs28397767	G	A	A	305331	0.958093	0.0215995	0.0474797	NA
CVD	DM	UKB	MT-ND5	ND5	NADH dehydrogenase subunit 5	12501	rs28397767	G	A	A	31789	0.929728	0.0640883	0.255574	NA
CVD	Overall	BiLEVE	MT-ND5	ND5	NADH dehydrogenase subunit 5	12612	rs28359172	A	G	G	40736	0.963021	0.0339197	0.266632	NA
CVD	noDM	BiLEVE	MT-ND5	ND5	NADH dehydrogenase subunit 5	12612	rs28359172	A	G	G	36175	0.953947	0.0361192	0.19178	NA
CVD	DM	BiLEVE	MT-ND5	ND5	NADH dehydrogenase subunit 5	12612	rs28359172	A	G	G	4561	1.03353	0.100638	0.743162	NA
CVD	Overall	UKB	MT-ND5	ND5	NADH dehydrogenase subunit 5	12612	rs28359172	A	G	G	336789	1.00083	0.0120818	0.945206	NA
CVD	noDM	UKB	MT-ND5	ND5	NADH dehydrogenase subunit 5	12612	rs28359172	A	G	G	305037	0.998645	0.0127567	0.915371	NA
CVD	DM	UKB	MT-ND5	ND5	NADH dehydrogenase subunit 5	12612	rs28359172	A	G	G	31752	1.01784	0.0378647	0.640513	NA
CVD	Overall	BiLEVE	MT-ND5	ND5	NADH dehydrogenase subunit 5	12633	rs3926883	C	A	A	40705	1.06063	0.0794763	0.458927	NA
CVD	noDM	BiLEVE	MT-ND5	ND5	NADH dehydrogenase subunit 5	12633	rs3926883	C	A	A	36148	1.12039	0.0844217	0.178115	NA
CVD	DM	BiLEVE	MT-ND5	ND5	NADH dehydrogenase subunit 5	12633	rs3926883	C	A	A	4557	0.708768	0.220847	0.119075	NA
CVD	Overall	UKB	MT-ND5	ND5	NADH dehydrogenase subunit 5	12633	rs3926883	C	A	A	337334	1.00265	0.0275807	0.923601	NA
CVD	noDM	UKB	MT-ND5	ND5	NADH dehydrogenase subunit 5	12633	rs3926883	C	A	A	305512	0.997348	0.0291413	0.927395	NA
CVD	DM	UKB	MT-ND5	ND5	NADH dehydrogenase subunit 5	12633	rs3926883	C	A	A	31822	1.04292	0.0864453	0.626849	NA
CVD	Overall	BiLEVE	MT-ND5	ND5	NADH dehydrogenase subunit 5	12705	rs193302956,COSM1155526	C	T	T	40752	0.954989	0.0419689	0.272477	NA
CVD	noDM	BiLEVE	MT-ND5	ND5	NADH dehydrogenase subunit 5	12705	rs193302956,COSM1155526	C	T	T	36182	0.961311	0.0444962	0.375215	NA
CVD	DM	BiLEVE	MT-ND5	ND5	NADH dehydrogenase subunit 5	12705	rs193302956,COSM1155526	C	T	T	4570	0.906914	0.12544	0.436029	NA
CVD	Overall	UKB	MT-ND5	ND5	NADH dehydrogenase subunit 5	12705	rs193302956,COSM1155526	C	T	T	337183	0.97738	0.0146372	0.118018	NA
CVD	noDM	UKB	MT-ND5	ND5	NADH dehydrogenase subunit 5	12705	rs193302956,COSM1155526	C	T	T	305393	0.974052	0.0154443	0.0887067	NA
CVD	DM	UKB	MT-ND5	ND5	NADH dehydrogenase subunit 5	12705	rs193302956,COSM1155526	C	T	T	31790	1.00652	0.0462408	0.888164	NA
CVD	Overall	UKB	MT-ND5	ND5	NADH dehydrogenase subunit 5	13020	rs75577869	T	C	C	337356	0.998396	0.0333001	0.961543	NA
CVD	noDM	UKB	MT-ND5	ND5	NADH dehydrogenase subunit 5	13020	rs75577869	T	C	C	305548	0.9994	0.0351381	0.986374	NA
CVD	DM	UKB	MT-ND5	ND5	NADH dehydrogenase subunit 5	13020	rs75577869	T	C	C	31808	0.992884	0.104535	0.945531	NA
CVD	Overall	UKB	MT-ND5	ND5	NADH dehydrogenase subunit 5	13104	rs878871104	A	G	G	336339	1.00493	0.0384846	0.898311	NA
CVD	noDM	UKB	MT-ND5	ND5	NADH dehydrogenase subunit 5	13104	rs878871104	A	G	G	304633	1.01559	0.0406374	0.703499	NA
CVD	DM	UKB	MT-ND5	ND5	NADH dehydrogenase subunit 5	13104	rs878871104	A	G	G	31706	0.912688	0.118068	0.439046	NA
CVD	Overall	BiLEVE	MT-ND5	ND5	NADH dehydrogenase subunit 5	13105	rs2853501,COSM6716789	A	G	G	40731	0.913575	0.101588	0.37359	NA
CVD	noDM	BiLEVE	MT-ND5	ND5	NADH dehydrogenase subunit 5	13105	rs2853501,COSM6716789	A	G	G	36169	0.887333	0.109136	0.27339	NA
CVD	DM	BiLEVE	MT-ND5	ND5	NADH dehydrogenase subunit 5	13105	rs2853501,COSM6716789	A	G	G	4562	1.09149	0.293502	0.765487	NA
CVD	Overall	UKB	MT-ND5	ND5	NADH dehydrogenase subunit 5	13105	rs2853501,COSM6716789	A	G	G	336797	0.957132	0.0351582	0.212696	NA
CVD	noDM	UKB	MT-ND5	ND5	NADH dehydrogenase subunit 5	13105	rs2853501,COSM6716789	A	G	G	305031	0.968606	0.0371179	0.390145	NA
CVD	DM	UKB	MT-ND5	ND5	NADH dehydrogenase subunit 5	13105	rs2853501,COSM6716789	A	G	G	31766	0.860827	0.10785	0.164672	NA
CVD	Overall	BiLEVE	MT-ND5	ND5	NADH dehydrogenase subunit 5	13617	rs2853503	T	C	C	40775	1.00517	0.0369063	0.888774	NA
CVD	noDM	BiLEVE	MT-ND5	ND5	NADH dehydrogenase subunit 5	13617	rs2853503	T	C	C	36203	1.02287	0.0391901	0.563988	NA
CVD	DM	BiLEVE	MT-ND5	ND5	NADH dehydrogenase subunit 5	13617	rs2853503	T	C	C	4572	0.888319	0.107818	0.272039	NA
CVD	Overall	UKB	MT-ND5	ND5	NADH dehydrogenase subunit 5	13617	rs2853503	T	C	C	337176	0.956914	0.0131291	0.000795111	NONE
CVD	noDM	UKB	MT-ND5	ND5	NADH dehydrogenase subunit 5	13617	rs2853503	T	C	C	305387	0.96103	0.0138529	0.00411239	NA
CVD	DM	UKB	MT-ND5	ND5	NADH dehydrogenase subunit 5	13617	rs2853503	T	C	C	31789	0.922266	0.0410369	0.0486199	NA
CVD	Overall	BiLEVE	MT-ND5	ND5	NADH dehydrogenase subunit 5	13708	rs28359178	G	A	A	40675	0.975165	0.0318518	0.429797	NA
CVD	noDM	BiLEVE	MT-ND5	ND5	NADH dehydrogenase subunit 5	13708	rs28359178	G	A	A	36115	0.961661	0.0338799	0.248552	NA
CVD	DM	BiLEVE	MT-ND5	ND5	NADH dehydrogenase subunit 5	13708	rs28359178	G	A	A	4560	1.08248	0.0958361	0.408248	NA
CVD	Overall	UKB	MT-ND5	ND5	NADH dehydrogenase subunit 5	13708	rs28359178	G	A	A	336271	1.00295	0.011371	0.795655	NA
CVD	noDM	UKB	MT-ND5	ND5	NADH dehydrogenase subunit 5	13708	rs28359178	G	A	A	304553	1.00277	0.0120037	0.817889	NA
CVD	DM	UKB	MT-ND5	ND5	NADH dehydrogenase subunit 5	13708	rs28359178	G	A	A	31718	1.00296	0.0356014	0.933933	NA
CVD	Overall	UKB	MT-ND5	ND5	NADH dehydrogenase subunit 5	13759	rs386420024	G	A	A	336171	1.04356	0.0294963	0.148293	NA
CVD	noDM	UKB	MT-ND5	ND5	NADH dehydrogenase subunit 5	13759	rs386420024	G	A	A	304462	1.04246	0.0310327	0.180221	NA
CVD	DM	UKB	MT-ND5	ND5	NADH dehydrogenase subunit 5	13759	rs386420024	G	A	A	31709	1.05629	0.0951511	0.564921	NA
CVD	Overall	UKB	MT-ND5	ND5	NADH dehydrogenase subunit 5	13780	rs41358152	A	G	G	337265	0.951458	0.0211484	0.0186286	NA
CVD	noDM	UKB	MT-ND5	ND5	NADH dehydrogenase subunit 5	13780	rs41358152	A	G	G	305468	0.954984	0.0223307	0.0391449	NA
CVD	DM	UKB	MT-ND5	ND5	NADH dehydrogenase subunit 5	13780	rs41358152	A	G	G	31797	0.919554	0.0657236	0.20194	NA
CVD	Overall	BiLEVE	MT-ND5	ND5	NADH dehydrogenase subunit 5	13879	rs879087566	T	C	C	40730	0.860677	0.0886724	0.0906419	NA
CVD	noDM	BiLEVE	MT-ND5	ND5	NADH dehydrogenase subunit 5	13879	rs879087566	T	C	C	36166	0.863764	0.0949705	0.123044	NA
CVD	DM	BiLEVE	MT-ND5	ND5	NADH dehydrogenase subunit 5	13879	rs879087566	T	C	C	4564	0.856782	0.248586	0.53407	NA
CVD	Overall	UKB	MT-ND5	ND5	NADH dehydrogenase subunit 5	13879	rs879087566	T	C	C	336608	1.07294	0.0315061	0.025451	NA
CVD	noDM	UKB	MT-ND5	ND5	NADH dehydrogenase subunit 5	13879	rs879087566	T	C	C	304855	1.07231	0.0331767	0.0353495	NA
CVD	DM	UKB	MT-ND5	ND5	NADH dehydrogenase subunit 5	13879	rs879087566	T	C	C	31753	1.07024	0.100839	0.500819	NA
CVD	Overall	BiLEVE	MT-ND5	ND5	NADH dehydrogenase subunit 5	13965	rs869156190	T	C	C	40709	1.18128	0.0949925	0.0794609	NA
CVD	noDM	BiLEVE	MT-ND5	ND5	NADH dehydrogenase subunit 5	13965	rs869156190	T	C	C	36145	1.1324	0.102125	0.223422	NA
CVD	DM	BiLEVE	MT-ND5	ND5	NADH dehydrogenase subunit 5	13965	rs869156190	T	C	C	4564	1.65866	0.28059	0.07133	NA
CVD	Overall	UKB	MT-ND5	ND5	NADH dehydrogenase subunit 5	13965	rs869156190	T	C	C	336864	1.02153	0.0344956	0.536914	NA
CVD	noDM	UKB	MT-ND5	ND5	NADH dehydrogenase subunit 5	13965	rs869156190	T	C	C	305101	1.01262	0.0363834	0.730253	NA
CVD	DM	UKB	MT-ND5	ND5	NADH dehydrogenase subunit 5	13965	rs869156190	T	C	C	31763	1.11089	0.11051	0.341315	NA
CVD	Overall	BiLEVE	MT-ND5	ND5	NADH dehydrogenase subunit 5	13966	rs41535848	A	G	G	40803	0.955485	0.0809515	0.573766	NA
CVD	noDM	BiLEVE	MT-ND5	ND5	NADH dehydrogenase subunit 5	13966	rs41535848	A	G	G	36229	0.908154	0.086077	0.263035	NA
CVD	DM	BiLEVE	MT-ND5	ND5	NADH dehydrogenase subunit 5	13966	rs41535848	A	G	G	4574	1.52968	0.26795	0.112661	NA
CVD	Overall	UKB	MT-ND5	ND5	NADH dehydrogenase subunit 5	13966	rs41535848	A	G	G	337316	1.01289	0.0284521	0.652582	NA
CVD	noDM	UKB	MT-ND5	ND5	NADH dehydrogenase subunit 5	13966	rs41535848	A	G	G	305517	1.02058	0.0298712	0.495223	NA
CVD	DM	UKB	MT-ND5	ND5	NADH dehydrogenase subunit 5	13966	rs41535848	A	G	G	31799	0.940728	0.0921637	0.507357	NA
CVD	Overall	BiLEVE	MT-ND5	ND5	NADH dehydrogenase subunit 5	14133	rs879100848	A	G	G	40753	0.925091	0.102935	0.449391	NA
CVD	noDM	BiLEVE	MT-ND5	ND5	NADH dehydrogenase subunit 5	14133	rs879100848	A	G	G	36184	0.93266	0.110456	0.527942	NA
CVD	DM	BiLEVE	MT-ND5	ND5	NADH dehydrogenase subunit 5	14133	rs879100848	A	G	G	4569	0.873714	0.283991	0.634521	NA
CVD	Overall	BiLEVE	MT-ND6	ND6	NADH dehydrogenase subunit 6	14167	rs193302977	C	T	T	40806	1.01363	0.0383607	0.724219	NA
CVD	noDM	BiLEVE	MT-ND6	ND6	NADH dehydrogenase subunit 6	14167	rs193302977	C	T	T	36232	1.01495	0.0405795	0.714549	NA
CVD	DM	BiLEVE	MT-ND6	ND6	NADH dehydrogenase subunit 6	14167	rs193302977	C	T	T	4574	0.999246	0.117991	0.994901	NA
CVD	Overall	UKB	MT-ND6	ND6	NADH dehydrogenase subunit 6	14167	rs193302977	C	T	T	337434	1.0134	0.0135211	0.324804	NA
CVD	noDM	UKB	MT-ND6	ND6	NADH dehydrogenase subunit 6	14167	rs193302977	C	T	T	305615	1.01611	0.0142473	0.262104	NA
CVD	DM	UKB	MT-ND6	ND6	NADH dehydrogenase subunit 6	14167	rs193302977	C	T	T	31819	0.990243	0.0428192	0.81889	NA
CVD	Overall	BiLEVE	MT-ND6	ND6	NADH dehydrogenase subunit 6	14233	rs3915611,COSM1138250,COSM1138251	A	G	G	40796	1.08645	0.0387955	0.0325686	NA
CVD	noDM	BiLEVE	MT-ND6	ND6	NADH dehydrogenase subunit 6	14233	rs3915611,COSM1138250,COSM1138251	A	G	G	36223	1.08347	0.0411435	0.0513519	NA
CVD	DM	BiLEVE	MT-ND6	ND6	NADH dehydrogenase subunit 6	14233	rs3915611,COSM1138250,COSM1138251	A	G	G	4573	1.12221	0.117716	0.327341	NA
CVD	Overall	UKB	MT-ND6	ND6	NADH dehydrogenase subunit 6	14582	rs41354845	A	G	G	333552	0.983777	0.028179	0.561623	NA
CVD	noDM	UKB	MT-ND6	ND6	NADH dehydrogenase subunit 6	14582	rs41354845	A	G	G	302147	1.00243	0.0296084	0.934747	NA
CVD	DM	UKB	MT-ND6	ND6	NADH dehydrogenase subunit 6	14582	rs41354845	A	G	G	31405	0.827097	0.0892505	0.0334222	NA
CVD	Overall	UKB	MT-ND6	ND6	NADH dehydrogenase subunit 6	14620	rs879141731,COSM6716820,COSM6716821	C	T	T	337263	0.966105	0.0264772	0.192794	NA
CVD	noDM	UKB	MT-ND6	ND6	NADH dehydrogenase subunit 6	14620	rs879141731,COSM6716820,COSM6716821	C	T	T	305468	0.958529	0.0279932	0.13026	NA
CVD	DM	UKB	MT-ND6	ND6	NADH dehydrogenase subunit 6	14620	rs879141731,COSM6716820,COSM6716821	C	T	T	31795	1.03695	0.0829614	0.66184	NA
CVD	Overall	BiLEVE	MT-CYB	Cytb	Cytochrome b	14766	rs193302980,rs527236041	T	C	C	40758	0.998222	0.0214697	0.933937	NA
CVD	noDM	BiLEVE	MT-CYB	Cytb	Cytochrome b	14766	rs193302980,rs527236041	T	C	C	36190	0.987971	0.0228225	0.59594	NA
CVD	DM	BiLEVE	MT-CYB	Cytb	Cytochrome b	14766	rs193302980,rs527236041	T	C	C	4568	1.08207	0.0636522	0.215283	NA
CVD	Overall	BiLEVE	MT-CYB	Cytb	Cytochrome b	14793	rs2853504	A	G	G	40745	0.988455	0.0486119	0.811199	NA
CVD	noDM	BiLEVE	MT-CYB	Cytb	Cytochrome b	14793	rs2853504	A	G	G	36182	0.996419	0.0517353	0.944723	NA
CVD	DM	BiLEVE	MT-CYB	Cytb	Cytochrome b	14793	rs2853504	A	G	G	4563	0.948131	0.141393	0.706394	NA
CVD	Overall	BiLEVE	MT-CYB	Cytb	Cytochrome b	14798	rs28357681	T	C	C	40804	1.00485	0.028948	0.867162	NA
CVD	noDM	BiLEVE	MT-CYB	Cytb	Cytochrome b	14798	rs28357681	T	C	C	36235	0.997339	0.0306914	0.930821	NA
CVD	DM	BiLEVE	MT-CYB	Cytb	Cytochrome b	14798	rs28357681	T	C	C	4569	1.06228	0.0884315	0.49447	NA
CVD	Overall	UKB	MT-CYB	Cytb	Cytochrome b	14798	rs28357681	T	C	C	337303	1.0017	0.0102307	0.868086	NA
CVD	noDM	UKB	MT-CYB	Cytb	Cytochrome b	14798	rs28357681	T	C	C	305499	1.00071	0.0107954	0.947442	NA
CVD	DM	UKB	MT-CYB	Cytb	Cytochrome b	14798	rs28357681	T	C	C	31804	1.0106	0.0321675	0.743012	NA
CVD	Overall	UKB	MT-CYB	Cytb	Cytochrome b	14869	rs879218419	G	A	A	321909	1.00372	0.0369202	0.919837	NA
CVD	noDM	UKB	MT-CYB	Cytb	Cytochrome b	14869	rs879218419	G	A	A	291486	1.00403	0.0388774	0.91765	NA
CVD	DM	UKB	MT-CYB	Cytb	Cytochrome b	14869	rs879218419	G	A	A	30423	1.00685	0.11808	0.953924	NA
CVD	Overall	UKB	MT-CYB	Cytb	Cytochrome b	14872	rs878879194,COSM1133253,COSM1133254	C	T	T	337463	1.00951	0.0378566	0.802495	NA
CVD	noDM	UKB	MT-CYB	Cytb	Cytochrome b	14872	rs878879194,COSM1133253,COSM1133254	C	T	T	305647	1.0176	0.0397662	0.660847	NA
CVD	DM	UKB	MT-CYB	Cytb	Cytochrome b	14872	rs878879194,COSM1133253,COSM1133254	C	T	T	31816	0.941256	0.122137	0.620125	NA
CVD	Overall	BiLEVE	MT-CYB	Cytb	Cytochrome b	14905	rs193302983,rs527236203	G	A	A	40745	1.07958	0.035404	0.0305611	NA
CVD	noDM	BiLEVE	MT-CYB	Cytb	Cytochrome b	14905	rs193302983,rs527236203	G	A	A	36181	1.09159	0.0375429	0.0195815	NA
CVD	DM	BiLEVE	MT-CYB	Cytb	Cytochrome b	14905	rs193302983,rs527236203	G	A	A	4564	0.989413	0.105407	0.919569	NA
CVD	Overall	UKB	MT-CYB	Cytb	Cytochrome b	14905	rs193302983,rs527236203	G	A	A	337098	1.04285	0.012558	0.000833669	Affx-79381705(1)
CVD	noDM	UKB	MT-CYB	Cytb	Cytochrome b	14905	rs193302983,rs527236203	G	A	A	305311	1.04301	0.0132334	0.00146175	NA
CVD	DM	UKB	MT-CYB	Cytb	Cytochrome b	14905	rs193302983,rs527236203	G	A	A	31787	1.04152	0.0398853	0.307721	NA
CVD	Overall	BiLEVE	MT-CYB	Cytb	Cytochrome b	15043	rs193302985,rs527236043	G	A	A	40738	0.986795	0.0542275	0.806351	NA
CVD	noDM	BiLEVE	MT-CYB	Cytb	Cytochrome b	15043	rs193302985,rs527236043	G	A	A	36169	0.978287	0.0574834	0.702548	NA
CVD	DM	BiLEVE	MT-CYB	Cytb	Cytochrome b	15043	rs193302985,rs527236043	G	A	A	4569	1.0638	0.166889	0.710932	NA
CVD	Overall	UKB	MT-CYB	Cytb	Cytochrome b	15043	rs193302985,rs527236043	G	A	A	336918	0.957443	0.0190502	0.022439	NA
CVD	noDM	UKB	MT-CYB	Cytb	Cytochrome b	15043	rs193302985,rs527236043	G	A	A	305147	0.956721	0.0201322	0.0279758	NA
CVD	DM	UKB	MT-CYB	Cytb	Cytochrome b	15043	rs193302985,rs527236043	G	A	A	31771	0.960583	0.0592132	0.497044	NA
CVD	Overall	BiLEVE	MT-CYB	Cytb	Cytochrome b	15218	rs2853506	A	G	G	40735	0.999658	0.0549764	0.995037	NA
CVD	noDM	BiLEVE	MT-CYB	Cytb	Cytochrome b	15218	rs2853506	A	G	G	36172	1.00878	0.0586669	0.881527	NA
CVD	DM	BiLEVE	MT-CYB	Cytb	Cytochrome b	15218	rs2853506	A	G	G	4563	0.953904	0.156578	0.763112	NA
CVD	Overall	UKB	MT-CYB	Cytb	Cytochrome b	15218	rs2853506	A	G	G	337119	0.937865	0.0194872	0.000995308	NONE
CVD	noDM	UKB	MT-CYB	Cytb	Cytochrome b	15218	rs2853506	A	G	G	305332	0.948842	0.0205184	0.0104883	NA
CVD	DM	UKB	MT-CYB	Cytb	Cytochrome b	15218	rs2853506	A	G	G	31787	0.843405	0.0613011	0.00546584	NA
CVD	Overall	BiLEVE	MT-CYB	Cytb	Cytochrome b	15257	rs41518645,COSM1138306,COSM1138307	G	A	A	40771	0.88943	0.0723895	0.105519	NA
CVD	noDM	BiLEVE	MT-CYB	Cytb	Cytochrome b	15257	rs41518645,COSM1138306,COSM1138307	G	A	A	36201	0.900206	0.077366	0.17418	NA
CVD	DM	BiLEVE	MT-CYB	Cytb	Cytochrome b	15257	rs41518645,COSM1138306,COSM1138307	G	A	A	4570	0.814531	0.203758	0.314034	NA
CVD	Overall	UKB	MT-CYB	Cytb	Cytochrome b	15257	rs41518645,COSM1138306,COSM1138307	G	A	A	337281	1.01258	0.0259698	0.630135	NA
CVD	noDM	UKB	MT-CYB	Cytb	Cytochrome b	15257	rs41518645,COSM1138306,COSM1138307	G	A	A	305485	1.01636	0.027332	0.55279	NA
CVD	DM	UKB	MT-CYB	Cytb	Cytochrome b	15257	rs41518645,COSM1138306,COSM1138307	G	A	A	31796	0.975849	0.0829995	0.768334	NA
CVD	Overall	UKB	MT-CYB	Cytb	Cytochrome b	15301	rs193302991,rs527236045	G	A	A	337222	0.99796	0.0474975	0.965714	NA
CVD	noDM	UKB	MT-CYB	Cytb	Cytochrome b	15301	rs193302991,rs527236045	G	A	A	305419	0.984133	0.0503846	0.750903	NA
CVD	DM	UKB	MT-CYB	Cytb	Cytochrome b	15301	rs193302991,rs527236045	G	A	A	31803	1.12046	0.146342	0.437043	NA
CVD	Overall	BiLEVE	MT-CYB	Cytb	Cytochrome b	15452	rs193302994,rs527236209	C	A	A	40631	1.0221	0.0262528	0.404995	NA
CVD	noDM	BiLEVE	MT-CYB	Cytb	Cytochrome b	15452	rs193302994,rs527236209	C	A	A	36076	1.02263	0.0278953	0.422445	NA
CVD	DM	BiLEVE	MT-CYB	Cytb	Cytochrome b	15452	rs193302994,rs527236209	C	A	A	4555	1.01738	0.0781006	0.825365	NA
CVD	Overall	UKB	MT-CYB	Cytb	Cytochrome b	15452	rs193302994,rs527236209	C	A	A	336212	1.02303	0.00931265	0.0145006	NA
CVD	noDM	UKB	MT-CYB	Cytb	Cytochrome b	15452	rs193302994,rs527236209	C	A	A	304510	1.02109	0.00982562	0.0336895	NA
CVD	DM	UKB	MT-CYB	Cytb	Cytochrome b	15452	rs193302994,rs527236209	C	A	A	31702	1.03888	0.0293375	0.193503	NA
CVD	Overall	BiLEVE	MT-CYB	Cytb	Cytochrome b	15693	rs200975632,COSM6716259,COSM6716260	T	C	C	40815	0.889606	0.0754728	0.121163	NA
CVD	noDM	BiLEVE	MT-CYB	Cytb	Cytochrome b	15693	rs200975632,COSM6716259,COSM6716260	T	C	C	36243	0.90824	0.0802114	0.230176	NA
CVD	DM	BiLEVE	MT-CYB	Cytb	Cytochrome b	15693	rs200975632,COSM6716259,COSM6716260	T	C	C	4572	0.763299	0.216383	0.211931	NA
CVD	Overall	UKB	MT-CYB	Cytb	Cytochrome b	15693	rs200975632,COSM6716259,COSM6716260	T	C	C	337521	0.962932	0.0266742	0.156762	NA
CVD	noDM	UKB	MT-CYB	Cytb	Cytochrome b	15693	rs200975632,COSM6716259,COSM6716260	T	C	C	305693	0.954593	0.0282065	0.0994576	NA
CVD	DM	UKB	MT-CYB	Cytb	Cytochrome b	15693	rs200975632,COSM6716259,COSM6716260	T	C	C	31828	1.0406	0.0835688	0.633895	NA
CVD	Overall	BiLEVE	MT-CYB	Cytb	Cytochrome b	15758	rs527236193	A	G	G	40791	0.868339	0.0786991	0.0728404	NA
CVD	noDM	BiLEVE	MT-CYB	Cytb	Cytochrome b	15758	rs527236193	A	G	G	36222	0.87688	0.0833764	0.115072	NA
CVD	DM	BiLEVE	MT-CYB	Cytb	Cytochrome b	15758	rs527236193	A	G	G	4569	0.818978	0.236046	0.397546	NA
CVD	Overall	UKB	MT-CYB	Cytb	Cytochrome b	15758	rs527236193	A	G	G	337313	0.958152	0.0276365	0.121903	NA
CVD	noDM	UKB	MT-CYB	Cytb	Cytochrome b	15758	rs527236193	A	G	G	305509	0.960586	0.0291267	0.167408	NA
CVD	DM	UKB	MT-CYB	Cytb	Cytochrome b	15758	rs527236193	A	G	G	31804	0.940244	0.0874372	0.481007	NA
CVD	Overall	BiLEVE	MT-CYB	Cytb	Cytochrome b	15833	rs41504845	C	T	T	40783	0.914843	0.0780228	0.253983	NA
CVD	noDM	BiLEVE	MT-CYB	Cytb	Cytochrome b	15833	rs41504845	C	T	T	36215	0.95473	0.0824098	0.574011	NA
CVD	DM	BiLEVE	MT-CYB	Cytb	Cytochrome b	15833	rs41504845	C	T	T	4568	0.657578	0.227533	0.0654259	NA
CVD	Overall	UKB	MT-CYB	Cytb	Cytochrome b	15833	rs41504845	C	T	T	337226	1.05842	0.0270472	0.0358039	NA
CVD	noDM	UKB	MT-CYB	Cytb	Cytochrome b	15833	rs41504845	C	T	T	305435	1.05916	0.0284979	0.0437196	NA
CVD	DM	UKB	MT-CYB	Cytb	Cytochrome b	15833	rs41504845	C	T	T	31791	1.04824	0.0858991	0.583339	NA
CVD	Overall	BiLEVE	MT-CYB	Cytb	Cytochrome b	15884	rs527236195	G	A	A	40727	1.05341	0.0926886	0.574542	NA
CVD	noDM	BiLEVE	MT-CYB	Cytb	Cytochrome b	15884	rs527236195	G	A	A	36160	0.988409	0.10055	0.90769	NA
CVD	DM	BiLEVE	MT-CYB	Cytb	Cytochrome b	15884	rs527236195	G	A	A	4567	1.58087	0.265958	0.0850719	NA
CVD	Overall	UKB	MT-CYB	Cytb	Cytochrome b	15884	rs527236195	G	A	A	336825	1.00262	0.0328553	0.936463	NA
CVD	noDM	UKB	MT-CYB	Cytb	Cytochrome b	15884	rs527236195	G	A	A	305061	1.01309	0.034471	0.705962	NA
CVD	DM	UKB	MT-CYB	Cytb	Cytochrome b	15884	rs527236195	G	A	A	31764	0.903405	0.106791	0.341478	NA
CVD	Overall	UKB	MT-TT	T	tRNA threonine	15924	-	A	G	G	336397	0.954502	0.0160731	0.00376618	NA
CVD	noDM	UKB	MT-TT	T	tRNA threonine	15924	-	A	G	G	304678	0.95957	0.0169443	0.0148667	NA
CVD	DM	UKB	MT-TT	T	tRNA threonine	15924	-	A	G	G	31719	0.90855	0.0505335	0.057714	NA
CVD	Overall	BiLEVE	MT-TT	T	tRNA threonine	15928	rs527236198	G	A	A	40579	1.08782	0.0354858	0.0176928	NA
CVD	noDM	BiLEVE	MT-TT	T	tRNA threonine	15928	rs527236198	G	A	A	36038	1.09734	0.037624	0.0135568	NA
CVD	DM	BiLEVE	MT-TT	T	tRNA threonine	15928	rs527236198	G	A	A	4541	1.01462	0.106042	0.891108	NA
CVD	Overall	UKB	MT-TT	T	tRNA threonine	15928	rs527236198	G	A	A	335683	1.04319	0.0125985	0.000789513	Affx-34461828(1)
CVD	noDM	UKB	MT-TT	T	tRNA threonine	15928	rs527236198	G	A	A	304030	1.04348	0.0132789	0.00134814	NA
CVD	DM	UKB	MT-TT	T	tRNA threonine	15928	rs527236198	G	A	A	31653	1.0399	0.0399309	0.327155	NA
CVD	Overall	UKB	MT-HV1	CR:HVS1/HV1	Hypervariable segment 1 [classic:16024-16365]	16145	rs41419246	G	A	A	337056	1.04161	0.0209171	0.0513132	NA
CVD	noDM	UKB	MT-HV1	CR:HVS1/HV1	Hypervariable segment 1 [classic:16024-16365]	16145	rs41419246	G	A	A	305271	1.04362	0.0220053	0.0523283	NA
CVD	DM	UKB	MT-HV1	CR:HVS1/HV1	Hypervariable segment 1 [classic:16024-16365]	16145	rs41419246	G	A	A	31785	1.02004	0.0672595	0.767949	NA
CVD	Overall	BiLEVE	MT-TAS	CR:TAS	termination-associated sequence	16162	rs41466049	A	G	G	40728	1.02615	0.0697091	0.711142	NA
CVD	noDM	BiLEVE	MT-TAS	CR:TAS	termination-associated sequence	16162	rs41466049	A	G	G	36161	1.02415	0.0739446	0.746949	NA
CVD	DM	BiLEVE	MT-TAS	CR:TAS	termination-associated sequence	16162	rs41466049	A	G	G	4567	1.04656	0.210273	0.82867	NA
CVD	Overall	BiLEVE	MT-TAS	CR:TAS	termination-associated sequence	16172	rs2853817	T	C	C	40695	0.881554	0.0552692	0.0225484	NA
CVD	noDM	BiLEVE	MT-TAS	CR:TAS	termination-associated sequence	16172	rs2853817	T	C	C	36125	0.880105	0.0589635	0.0303127	NA
CVD	DM	BiLEVE	MT-TAS	CR:TAS	termination-associated sequence	16172	rs2853817	T	C	C	4570	0.896745	0.160084	0.496004	NA
CVD	Overall	BiLEVE	MT-HV1	CR:HVS1/HV1	Hypervariable segment 1 [classic:16024-16365]	16193	rs879091650	C	T	T	40651	0.930163	0.0897643	0.419954	NA
CVD	noDM	BiLEVE	MT-HV1	CR:HVS1/HV1	Hypervariable segment 1 [classic:16024-16365]	16193	rs879091650	C	T	T	36098	0.956638	0.0948508	0.640237	NA
CVD	DM	BiLEVE	MT-HV1	CR:HVS1/HV1	Hypervariable segment 1 [classic:16024-16365]	16193	rs879091650	C	T	T	4553	0.748125	0.26647	0.276156	NA
CVD	Overall	UKB	MT-HV1	CR:HVS1/HV1	Hypervariable segment 1 [classic:16024-16365]	16193	rs879091650	C	T	T	336441	1.02153	0.0334865	0.524605	NA
CVD	noDM	UKB	MT-HV1	CR:HVS1/HV1	Hypervariable segment 1 [classic:16024-16365]	16193	rs879091650	C	T	T	304725	1.01599	0.0353495	0.653693	NA
CVD	DM	UKB	MT-HV1	CR:HVS1/HV1	Hypervariable segment 1 [classic:16024-16365]	16193	rs879091650	C	T	T	31716	1.05879	0.105905	0.589595	NA
CVD	Overall	BiLEVE	MT-HV1	CR:HVS1/HV1	Hypervariable segment 1 [classic:16024-16365]	16223	rs2853513	C	T	T	40715	0.974724	0.041461	0.536926	NA
CVD	noDM	BiLEVE	MT-HV1	CR:HVS1/HV1	Hypervariable segment 1 [classic:16024-16365]	16223	rs2853513	C	T	T	36157	0.977124	0.0439614	0.598607	NA
CVD	DM	BiLEVE	MT-HV1	CR:HVS1/HV1	Hypervariable segment 1 [classic:16024-16365]	16223	rs2853513	C	T	T	4558	0.954794	0.124598	0.710438	NA
CVD	Overall	UKB	MT-HV1	CR:HVS1/HV1	Hypervariable segment 1 [classic:16024-16365]	16270	rs2857290	C	T	T	336507	0.959655	0.0133989	0.00211562	NA
CVD	noDM	UKB	MT-HV1	CR:HVS1/HV1	Hypervariable segment 1 [classic:16024-16365]	16270	rs2857290	C	T	T	304770	0.963608	0.0141354	0.00872749	NA
CVD	DM	UKB	MT-HV1	CR:HVS1/HV1	Hypervariable segment 1 [classic:16024-16365]	16270	rs2857290	C	T	T	31737	0.92542	0.0419412	0.0646012	NA
CVD	Overall	BiLEVE	MT-HV1	CR:HVS1/HV1	Hypervariable segment 1 [classic:16024-16365]	16298	rs148377232	T	C	C	40751	1.00006	0.0534525	0.999092	NA
CVD	noDM	BiLEVE	MT-HV1	CR:HVS1/HV1	Hypervariable segment 1 [classic:16024-16365]	16298	rs148377232	T	C	C	36187	0.97965	0.0572354	0.719438	NA
CVD	DM	BiLEVE	MT-HV1	CR:HVS1/HV1	Hypervariable segment 1 [classic:16024-16365]	16298	rs148377232	T	C	C	4564	1.16067	0.154806	0.335807	NA
CVD	Overall	BiLEVE	MT-HV1	CR:HVS1/HV1	Hypervariable segment 1 [classic:16024-16365]	16356	rs62581340	T	C	C	40599	0.958841	0.0543811	0.439594	NA
CVD	noDM	BiLEVE	MT-HV1	CR:HVS1/HV1	Hypervariable segment 1 [classic:16024-16365]	16356	rs62581340	T	C	C	36043	0.962654	0.0579547	0.511343	NA
CVD	DM	BiLEVE	MT-HV1	CR:HVS1/HV1	Hypervariable segment 1 [classic:16024-16365]	16356	rs62581340	T	C	C	4556	0.93565	0.156668	0.671162	NA
CVD	Overall	UKB	MT-HV1	CR:HVS1/HV1	Hypervariable segment 1 [classic:16024-16365]	16356	rs62581340	T	C	C	335804	0.981542	0.0192446	0.333	NA
CVD	noDM	UKB	MT-HV1	CR:HVS1/HV1	Hypervariable segment 1 [classic:16024-16365]	16356	rs62581340	T	C	C	304173	0.977116	0.0202957	0.254015	NA
CVD	DM	UKB	MT-HV1	CR:HVS1/HV1	Hypervariable segment 1 [classic:16024-16365]	16356	rs62581340	T	C	C	31631	1.01837	0.0612157	0.766187	NA
CVD	Overall	BiLEVE	MT-HV1	CR:HVS1/HV1	Hypervariable segment 1 [classic:16024-16365]	16362	rs62581341	T	C	C	40695	0.999427	0.038754	0.988193	NA
CVD	noDM	BiLEVE	MT-HV1	CR:HVS1/HV1	Hypervariable segment 1 [classic:16024-16365]	16362	rs62581341	T	C	C	36132	1.00435	0.0414702	0.916615	NA
CVD	DM	BiLEVE	MT-HV1	CR:HVS1/HV1	Hypervariable segment 1 [classic:16024-16365]	16362	rs62581341	T	C	C	4563	0.960218	0.10866	0.708703	NA
CVD	Overall	UKB	MT-HV1	CR:HVS1/HV1	Hypervariable segment 1 [classic:16024-16365]	16362	rs62581341	T	C	C	336598	0.993046	0.0137516	0.611821	NA
CVD	noDM	UKB	MT-HV1	CR:HVS1/HV1	Hypervariable segment 1 [classic:16024-16365]	16362	rs62581341	T	C	C	304866	0.987142	0.0145159	0.372641	NA
CVD	DM	UKB	MT-HV1	CR:HVS1/HV1	Hypervariable segment 1 [classic:16024-16365]	16362	rs62581341	T	C	C	31732	1.04723	0.0434474	0.288206	NA
CVD	Overall	UKB	NA	CR:HVS2	Hypervariable segment 2 [classic:73-340 ]	16391	rs869031877	G	A	A	336398	0.961195	0.0212325	0.0623166	NA
CVD	noDM	UKB	NA	CR:HVS2	Hypervariable segment 2 [classic:73-340 ]	16391	rs869031877	G	A	A	304664	0.966001	0.0224076	0.122663	NA
CVD	DM	UKB	NA	CR:HVS2	Hypervariable segment 2 [classic:73-340 ]	16391	rs869031877	G	A	A	31734	0.918556	0.0661434	0.199014	NA

## Sheet: Hypertension
PHENO	COHORT	ARRAY	GENE	REGION	DESCRIPTION	BP	RS	REF	ALT	A1	OBS_CT	OR.or.BETA	SE.or.LOG(OR)_SE	P	SP2
Hypertension	Overall	BiLEVE	MT-HV2	CR:HVS2	Hypervariable segment 2 [classic:73-340 ]	73	rs869183622	G	A	A	40729	0.990535	0.0269308	0.723985	NA
Hypertension	noDM	BiLEVE	MT-HV2	CR:HVS2	Hypervariable segment 2 [classic:73-340 ]	73	rs869183622	G	A	A	36164	0.97601	0.0279337	0.384683	NA
Hypertension	DM	BiLEVE	MT-HV2	CR:HVS2	Hypervariable segment 2 [classic:73-340 ]	73	rs869183622	G	A	A	4565	1.19783	0.102	0.0767674	NA
Hypertension	Overall	UKB	MT-HV2	CR:HVS2	Hypervariable segment 2 [classic:73-340 ]	73	rs869183622	G	A	A	336776	0.994191	0.00896752	0.515874	NA
Hypertension	noDM	UKB	MT-HV2	CR:HVS2	Hypervariable segment 2 [classic:73-340 ]	73	rs869183622	G	A	A	305052	0.990562	0.00927965	0.30683	NA
Hypertension	DM	UKB	MT-HV2	CR:HVS2	Hypervariable segment 2 [classic:73-340 ]	73	rs869183622	G	A	A	31724	1.04877	0.0348265	0.171501	NA
Hypertension	Overall	BiLEVE	MT-OHR	CR:OH	H-strand origins	150	rs62581312	C	T	T	40703	1.07822	0.0468578	0.107989	NA
Hypertension	noDM	BiLEVE	MT-OHR	CR:OH	H-strand origins	150	rs62581312	C	T	T	36142	1.06425	0.0484643	0.198827	NA
Hypertension	DM	BiLEVE	MT-OHR	CR:OH	H-strand origins	150	rs62581312	C	T	T	4561	1.31523	0.186826	0.142468	NA
Hypertension	Overall	UKB	MT-OHR	CR:OH	H-strand origins	150	rs62581312	C	T	T	336601	1.03429	0.0155379	0.0300261	NA
Hypertension	noDM	UKB	MT-OHR	CR:OH	H-strand origins	150	rs62581312	C	T	T	304876	1.03018	0.0160614	0.0641514	NA
Hypertension	DM	UKB	MT-OHR	CR:OH	H-strand origins	150	rs62581312	C	T	T	31725	1.09251	0.0614339	0.149788	NA
Hypertension	Overall	BiLEVE	MT-OHR	CR:OH	H-strand origins	228	rs41323649	G	A	A	40683	0.914826	0.0528827	0.0923017	NA
Hypertension	noDM	BiLEVE	MT-OHR	CR:OH	H-strand origins	228	rs41323649	G	A	A	36122	0.912069	0.0546892	0.0923824	NA
Hypertension	DM	BiLEVE	MT-OHR	CR:OH	H-strand origins	228	rs41323649	G	A	A	4561	0.969079	0.208659	0.880346	NA
Hypertension	Overall	UKB	MT-OHR	CR:OH	H-strand origins	228	rs41323649	G	A	A	336365	1.00309	0.0181787	0.865388	NA
Hypertension	noDM	UKB	MT-OHR	CR:OH	H-strand origins	228	rs41323649	G	A	A	304657	1.00726	0.0188452	0.701145	NA
Hypertension	DM	UKB	MT-OHR	CR:OH	H-strand origins	228	rs41323649	G	A	A	31708	0.946611	0.0686657	0.424263	NA
Hypertension	Overall	BiLEVE	MT-TFX	CR:TFX	mtTF1 binding site	239	rs879149197	T	C	C	40700	1.08609	0.0814799	0.310786	NA
Hypertension	noDM	BiLEVE	MT-TFX	CR:TFX	mtTF1 binding site	239	rs879149197	T	C	C	36135	1.07185	0.0841868	0.409802	NA
Hypertension	DM	BiLEVE	MT-TFX	CR:TFX	mtTF1 binding site	239	rs879149197	T	C	C	4565	1.28282	0.328687	0.448598	NA
Hypertension	Overall	BiLEVE	MT-OHR	CR:OH	H-strand origins	263	rs2853515	G	A	A	40760	0.854239	0.124416	0.205415	NA
Hypertension	noDM	BiLEVE	MT-OHR	CR:OH	H-strand origins	263	rs2853515	G	A	A	36195	0.859283	0.12841	0.237589	NA
Hypertension	DM	BiLEVE	MT-OHR	CR:OH	H-strand origins	263	rs2853515	G	A	A	4565	0.764361	0.501417	0.59202	NA
Hypertension	Overall	UKB	MT-TFY	CR:TFY	mtTF1 binding site	295	rs41528348	C	T	T	334628	1.00157	0.0143982	0.913386	NA
Hypertension	noDM	UKB	MT-TFY	CR:TFY	mtTF1 binding site	295	rs41528348	C	T	T	303077	1.00265	0.014906	0.85906	NA
Hypertension	DM	UKB	MT-TFY	CR:TFY	mtTF1 binding site	295	rs41528348	C	T	T	31551	0.982031	0.0555029	0.743894	NA
Hypertension	Overall	BiLEVE	MT-HV3	CR:HVS3	Hypervariable segment 3	456	rs41356551	C	T	T	40655	1.01086	0.069198	0.875936	NA
Hypertension	noDM	BiLEVE	MT-HV3	CR:HVS3	Hypervariable segment 3	456	rs41356551	C	T	T	36099	1.03664	0.0722748	0.618587	NA
Hypertension	DM	BiLEVE	MT-HV3	CR:HVS3	Hypervariable segment 3	456	rs41356551	C	T	T	4556	0.754394	0.236648	0.233665	NA
Hypertension	Overall	BiLEVE	MT-HV3	CR:HVS3	Hypervariable segment 3	497	rs28660704	C	T	T	40771	0.970744	0.0621227	0.632677	NA
Hypertension	noDM	BiLEVE	MT-HV3	CR:HVS3	Hypervariable segment 3	497	rs28660704	C	T	T	36200	0.977207	0.0645348	0.720885	NA
Hypertension	DM	BiLEVE	MT-HV3	CR:HVS3	Hypervariable segment 3	497	rs28660704	C	T	T	4571	0.872571	0.228315	0.550486	NA
Hypertension	Overall	UKB	MT-HV3	CR:HVS3	Hypervariable segment 3	497	rs28660704	C	T	T	337059	1.00578	0.0209653	0.783453	NA
Hypertension	noDM	UKB	MT-HV3	CR:HVS3	Hypervariable segment 3	497	rs28660704	C	T	T	305299	0.993456	0.0216194	0.76135	NA
Hypertension	DM	UKB	MT-HV3	CR:HVS3	Hypervariable segment 3	497	rs28660704	C	T	T	31760	1.21114	0.0868482	0.0274049	NA
Hypertension	Overall	BiLEVE	MT-RNR1	12S	12S ribosomal RNA	709	rs2853517	G	A	A	40611	1.04753	0.0383156	0.225506	NA
Hypertension	noDM	BiLEVE	MT-RNR1	12S	12S ribosomal RNA	709	rs2853517	G	A	A	36063	1.05658	0.0398239	0.167	NA
Hypertension	DM	BiLEVE	MT-RNR1	12S	12S ribosomal RNA	709	rs2853517	G	A	A	4548	0.928207	0.140043	0.594738	NA
Hypertension	Overall	UKB	MT-RNR1	12S	12S ribosomal RNA	709	rs2853517	G	A	A	335475	1.01091	0.0126614	0.391452	NA
Hypertension	noDM	UKB	MT-RNR1	12S	12S ribosomal RNA	709	rs2853517	G	A	A	303858	1.01599	0.0131132	0.226348	NA
Hypertension	DM	UKB	MT-RNR1	12S	12S ribosomal RNA	709	rs2853517	G	A	A	31617	0.942544	0.0484297	0.221773	NA
Hypertension	Overall	UKB	MT-RNR1	12S	12S ribosomal RNA	750	rs2853518	G	A	A	329896	0.926069	0.0341642	0.024566	NA
Hypertension	noDM	UKB	MT-RNR1	12S	12S ribosomal RNA	750	rs2853518	G	A	A	298932	0.934402	0.035445	0.055595	NA
Hypertension	DM	UKB	MT-RNR1	12S	12S ribosomal RNA	750	rs2853518	G	A	A	30964	0.827863	0.127317	0.137873	NA
Hypertension	Overall	BiLEVE	MT-RNR1	12S	12S ribosomal RNA	1243	rs28358572	T	C	C	40791	0.914708	0.0972339	0.359213	NA
Hypertension	noDM	BiLEVE	MT-RNR1	12S	12S ribosomal RNA	1243	rs28358572	T	C	C	36218	0.903566	0.101571	0.318096	NA
Hypertension	DM	BiLEVE	MT-RNR1	12S	12S ribosomal RNA	1243	rs28358572	T	C	C	4573	1.04524	0.34095	0.896747	NA
Hypertension	Overall	UKB	MT-RNR1	12S	12S ribosomal RNA	1243	rs28358572	T	C	C	337311	1.0081	0.0323801	0.80327	NA
Hypertension	noDM	UKB	MT-RNR1	12S	12S ribosomal RNA	1243	rs28358572	T	C	C	305529	1.00412	0.0334739	0.902212	NA
Hypertension	DM	UKB	MT-RNR1	12S	12S ribosomal RNA	1243	rs28358572	T	C	C	31782	1.0624	0.127942	0.636121	NA
Hypertension	Overall	BiLEVE	MT-RNR1	12S	12S ribosomal RNA	1438	rs2001030	G	A	A	40725	1.04056	0.0817564	0.626725	NA
Hypertension	noDM	BiLEVE	MT-RNR1	12S	12S ribosomal RNA	1438	rs2001030	G	A	A	36159	1.06038	0.0850954	0.490828	NA
Hypertension	DM	BiLEVE	MT-RNR1	12S	12S ribosomal RNA	1438	rs2001030	G	A	A	4566	0.799863	0.290761	0.442465	NA
Hypertension	Overall	UKB	MT-RNR1	12S	12S ribosomal RNA	1438	rs2001030	G	A	A	336674	0.994225	0.0270277	0.83032	NA
Hypertension	noDM	UKB	MT-RNR1	12S	12S ribosomal RNA	1438	rs2001030	G	A	A	304944	1.01307	0.0281543	0.644576	NA
Hypertension	DM	UKB	MT-RNR1	12S	12S ribosomal RNA	1438	rs2001030	G	A	A	31730	0.793923	0.0955775	0.0157581	NA
Hypertension	Overall	BiLEVE	MT-RNR2	16S	16S ribosomal RNA	1719	rs3928305	G	A	A	40706	1.05379	0.0493688	0.288549	NA
Hypertension	noDM	BiLEVE	MT-RNR2	16S	16S ribosomal RNA	1719	rs3928305	G	A	A	36140	1.03461	0.0509125	0.503926	NA
Hypertension	DM	BiLEVE	MT-RNR2	16S	16S ribosomal RNA	1719	rs3928305	G	A	A	4566	1.40092	0.207625	0.104429	NA
Hypertension	Overall	UKB	MT-RNR2	16S	16S ribosomal RNA	1719	rs3928305	G	A	A	336686	0.968677	0.0161029	0.0481235	NA
Hypertension	noDM	UKB	MT-RNR2	16S	16S ribosomal RNA	1719	rs3928305	G	A	A	304958	0.968621	0.0166559	0.0555988	NA
Hypertension	DM	UKB	MT-RNR2	16S	16S ribosomal RNA	1719	rs3928305	G	A	A	31728	0.968745	0.0628905	0.613628	NA
Hypertension	Overall	BiLEVE	MT-RNR2	16S	16S ribosomal RNA	1721	rs200626438	C	T	T	40786	1.09518	0.0855239	0.287758	NA
Hypertension	noDM	BiLEVE	MT-RNR2	16S	16S ribosomal RNA	1721	rs200626438	C	T	T	36213	1.08131	0.0885976	0.377603	NA
Hypertension	DM	BiLEVE	MT-RNR2	16S	16S ribosomal RNA	1721	rs200626438	C	T	T	4573	1.27914	0.332425	0.458947	NA
Hypertension	Overall	UKB	MT-RNR2	16S	16S ribosomal RNA	1721	rs200626438	C	T	T	337209	0.99377	0.027705	0.821521	NA
Hypertension	noDM	UKB	MT-RNR2	16S	16S ribosomal RNA	1721	rs200626438	C	T	T	305427	0.981394	0.0285905	0.511241	NA
Hypertension	DM	UKB	MT-RNR2	16S	16S ribosomal RNA	1721	rs200626438	C	T	T	31782	1.19891	0.113468	0.109868	NA
Hypertension	Overall	BiLEVE	MT-RNR2	16S	16S ribosomal RNA	1811	rs28358576	A	G	G	40754	1.03672	0.0401131	0.36861	NA
Hypertension	noDM	BiLEVE	MT-RNR2	16S	16S ribosomal RNA	1811	rs28358576	A	G	G	36185	1.04098	0.0415375	0.333575	NA
Hypertension	DM	BiLEVE	MT-RNR2	16S	16S ribosomal RNA	1811	rs28358576	A	G	G	4569	0.96396	0.154184	0.811831	NA
Hypertension	Overall	UKB	MT-RNR2	16S	16S ribosomal RNA	2158	rs41349444	T	C	C	337310	1.04382	0.0382635	0.262375	NA
Hypertension	noDM	UKB	MT-RNR2	16S	16S ribosomal RNA	2158	rs41349444	T	C	C	305524	1.03698	0.0394794	0.357698	NA
Hypertension	DM	UKB	MT-RNR2	16S	16S ribosomal RNA	2158	rs41349444	T	C	C	31786	1.13954	0.156114	0.402743	NA
Hypertension	Overall	BiLEVE	MT-RNR2	16S	16S ribosomal RNA	2706	rs2854128	G	A	A	40752	0.977535	0.0269738	0.399592	NA
Hypertension	noDM	BiLEVE	MT-RNR2	16S	16S ribosomal RNA	2706	rs2854128	G	A	A	36179	0.971004	0.0279811	0.292986	NA
Hypertension	DM	BiLEVE	MT-RNR2	16S	16S ribosomal RNA	2706	rs2854128	G	A	A	4573	1.06234	0.101869	0.552752	NA
Hypertension	Overall	UKB	MT-RNR2	16S	16S ribosomal RNA	2706	rs2854128	G	A	A	336875	0.999454	0.00898996	0.951556	NA
Hypertension	noDM	UKB	MT-RNR2	16S	16S ribosomal RNA	2706	rs2854128	G	A	A	305131	0.993478	0.00930175	0.481799	NA
Hypertension	DM	UKB	MT-RNR2	16S	16S ribosomal RNA	2706	rs2854128	G	A	A	31744	1.09022	0.0350004	0.0135936	NA
Hypertension	Overall	BiLEVE	MT-RNR2	16S	16S ribosomal RNA	3010	rs3928306	G	A	A	40733	0.974287	0.0304052	0.391597	NA
Hypertension	noDM	BiLEVE	MT-RNR2	16S	16S ribosomal RNA	3010	rs3928306	G	A	A	36168	0.971941	0.0315237	0.366621	NA
Hypertension	DM	BiLEVE	MT-RNR2	16S	16S ribosomal RNA	3010	rs3928306	G	A	A	4565	1.01447	0.115639	0.90115	NA
Hypertension	Overall	UKB	MT-RNR2	16S	16S ribosomal RNA	3010	rs3928306	G	A	A	336592	1.00094	0.0101822	0.926691	NA
Hypertension	noDM	UKB	MT-RNR2	16S	16S ribosomal RNA	3010	rs3928306	G	A	A	304878	0.996441	0.0105308	0.734944	NA
Hypertension	DM	UKB	MT-RNR2	16S	16S ribosomal RNA	3010	rs3928306	G	A	A	31714	1.06513	0.0399249	0.11404	NA
Hypertension	Overall	BiLEVE	MT-RNR2	16S	16S ribosomal RNA	3197	rs2854131	T	C	C	40679	0.935792	0.0456906	0.146388	NA
Hypertension	noDM	BiLEVE	MT-RNR2	16S	16S ribosomal RNA	3197	rs2854131	T	C	C	36118	0.940986	0.0475643	0.200955	NA
Hypertension	DM	BiLEVE	MT-RNR2	16S	16S ribosomal RNA	3197	rs2854131	T	C	C	4561	0.897542	0.164834	0.511962	NA
Hypertension	Overall	UKB	MT-RNR2	16S	16S ribosomal RNA	3197	rs2854131	T	C	C	336603	0.997507	0.0154741	0.871829	NA
Hypertension	noDM	UKB	MT-RNR2	16S	16S ribosomal RNA	3197	rs2854131	T	C	C	304886	1.00158	0.0160324	0.921316	NA
Hypertension	DM	UKB	MT-RNR2	16S	16S ribosomal RNA	3197	rs2854131	T	C	C	31717	0.945475	0.0589076	0.341204	NA
Hypertension	Overall	UKB	MT-ND1	ND1	NADH Dehydrogenase subunit 1	3394	rs41460449	T	C	C	336712	1.06323	0.0379439	0.106151	NA
Hypertension	noDM	UKB	MT-ND1	ND1	NADH Dehydrogenase subunit 1	3394	rs41460449	T	C	C	304976	1.07173	0.0393988	0.0786829	NA
Hypertension	DM	UKB	MT-ND1	ND1	NADH Dehydrogenase subunit 1	3394	rs41460449	T	C	C	31736	0.964327	0.140368	0.7958	NA
Hypertension	Overall	BiLEVE	MT-ND1	ND1	NADH Dehydrogenase subunit 1	3480	rs28358584	A	G	G	40762	1.00908	0.047818	0.850055	NA
Hypertension	noDM	BiLEVE	MT-ND1	ND1	NADH Dehydrogenase subunit 1	3480	rs28358584	A	G	G	36191	1.01362	0.0494993	0.784618	NA
Hypertension	DM	BiLEVE	MT-ND1	ND1	NADH Dehydrogenase subunit 1	3480	rs28358584	A	G	G	4571	0.936399	0.184827	0.722183	NA
Hypertension	Overall	UKB	MT-ND1	ND1	NADH Dehydrogenase subunit 1	3480	rs28358584	A	G	G	337043	0.986273	0.0158444	0.383013	NA
Hypertension	noDM	UKB	MT-ND1	ND1	NADH Dehydrogenase subunit 1	3480	rs28358584	A	G	G	305284	0.98386	0.0163819	0.320567	NA
Hypertension	DM	UKB	MT-ND1	ND1	NADH Dehydrogenase subunit 1	3480	rs28358584	A	G	G	31759	1.02018	0.0623274	0.748563	NA
Hypertension	Overall	UKB	MT-ND1	ND1	NADH Dehydrogenase subunit 1	3720	rs41355750	A	G	G	336718	1.0236	0.0414063	0.573148	NA
Hypertension	noDM	UKB	MT-ND1	ND1	NADH Dehydrogenase subunit 1	3720	rs41355750	A	G	G	304996	1.02738	0.0429516	0.529405	NA
Hypertension	DM	UKB	MT-ND1	ND1	NADH Dehydrogenase subunit 1	3720	rs41355750	A	G	G	31722	0.978565	0.155224	0.888982	NA
Hypertension	Overall	BiLEVE	MT-ND1	ND1	NADH Dehydrogenase subunit 1	3796	rs28357970	A	G	G	40752	1.273	0.114003	0.0342384	NA
Hypertension	noDM	BiLEVE	MT-ND1	ND1	NADH Dehydrogenase subunit 1	3796	rs28357970	A	G	G	36181	1.21202	0.11726	0.101029	NA
Hypertension	DM	BiLEVE	MT-ND1	ND1	NADH Dehydrogenase subunit 1	3796	rs28357970	A	G	G	4571	2.73213	0.526973	0.0564851	NA
Hypertension	Overall	UKB	MT-ND1	ND1	NADH Dehydrogenase subunit 1	3796	rs28357970	A	G	G	336990	0.991124	0.0357213	0.802909	NA
Hypertension	noDM	UKB	MT-ND1	ND1	NADH Dehydrogenase subunit 1	3796	rs28357970	A	G	G	305235	0.983351	0.0368638	0.648801	NA
Hypertension	DM	UKB	MT-ND1	ND1	NADH Dehydrogenase subunit 1	3796	rs28357970	A	G	G	31755	1.11028	0.145511	0.472172	NA
Hypertension	Overall	UKB	MT-ND1	ND1	NADH Dehydrogenase subunit 1	3915	rs41524046,COSM1138362,COSM1138363	G	A	A	336955	0.970152	0.0274971	0.270446	NA
Hypertension	noDM	UKB	MT-ND1	ND1	NADH Dehydrogenase subunit 1	3915	rs41524046,COSM1138362,COSM1138363	G	A	A	305194	0.965123	0.0284197	0.211626	NA
Hypertension	DM	UKB	MT-ND1	ND1	NADH Dehydrogenase subunit 1	3915	rs41524046,COSM1138362,COSM1138363	G	A	A	31761	1.04366	0.109261	0.695683	NA
Hypertension	Overall	BiLEVE	MT-ND1	ND1	NADH Dehydrogenase subunit 1	3992	rs879051705	C	T	T	40769	1.15346	0.0897802	0.111791	NA
Hypertension	noDM	BiLEVE	MT-ND1	ND1	NADH Dehydrogenase subunit 1	3992	rs879051705	C	T	T	36198	1.16293	0.0927694	0.103715	NA
Hypertension	DM	BiLEVE	MT-ND1	ND1	NADH Dehydrogenase subunit 1	3992	rs879051705	C	T	T	4571	1.05186	0.354646	0.886634	NA
Hypertension	Overall	UKB	MT-ND1	ND1	NADH Dehydrogenase subunit 1	3992	rs879051705	C	T	T	337015	1.01862	0.0298544	0.536554	NA
Hypertension	noDM	UKB	MT-ND1	ND1	NADH Dehydrogenase subunit 1	3992	rs879051705	C	T	T	305250	1.00371	0.0307474	0.904031	NA
Hypertension	DM	UKB	MT-ND1	ND1	NADH Dehydrogenase subunit 1	3992	rs879051705	C	T	T	31765	1.28548	0.12674	0.047534	NA
Hypertension	Overall	BiLEVE	MT-ND1	ND1	NADH Dehydrogenase subunit 1	4024	-	A	G	G	40757	1.11551	0.0964932	0.257288	NA
Hypertension	noDM	BiLEVE	MT-ND1	ND1	NADH Dehydrogenase subunit 1	4024	-	A	G	G	36189	1.1296	0.100119	0.223546	NA
Hypertension	DM	BiLEVE	MT-ND1	ND1	NADH Dehydrogenase subunit 1	4024	-	A	G	G	4568	0.95785	0.359149	0.904559	NA
Hypertension	Overall	UKB	MT-ND1	ND1	NADH Dehydrogenase subunit 1	4024	-	A	G	G	337100	1.02692	0.0324656	0.4133	NA
Hypertension	noDM	UKB	MT-ND1	ND1	NADH Dehydrogenase subunit 1	4024	-	A	G	G	305340	1.01758	0.0334729	0.602565	NA
Hypertension	DM	UKB	MT-ND1	ND1	NADH Dehydrogenase subunit 1	4024	-	A	G	G	31760	1.18025	0.134332	0.21732	NA
Hypertension	Overall	BiLEVE	MT-ND1	ND1	NADH Dehydrogenase subunit 1	4216	COSM1138370,COSM1138371	T	C	C	40712	1.02945	0.0327863	0.376089	NA
Hypertension	noDM	BiLEVE	MT-ND1	ND1	NADH Dehydrogenase subunit 1	4216	COSM1138370,COSM1138371	T	C	C	36149	1.04538	0.0340728	0.192729	NA
Hypertension	DM	BiLEVE	MT-ND1	ND1	NADH Dehydrogenase subunit 1	4216	COSM1138370,COSM1138371	T	C	C	4563	0.853952	0.120069	0.188539	NA
Hypertension	Overall	UKB	MT-ND1	ND1	NADH Dehydrogenase subunit 1	4216	COSM1138370,COSM1138371	T	C	C	336834	1.01027	0.010926	0.349495	NA
Hypertension	noDM	UKB	MT-ND1	ND1	NADH Dehydrogenase subunit 1	4216	COSM1138370,COSM1138371	T	C	C	305094	1.01782	0.0113184	0.11857	NA
Hypertension	DM	UKB	MT-ND1	ND1	NADH Dehydrogenase subunit 1	4216	COSM1138370,COSM1138371	T	C	C	31740	0.910361	0.0416648	0.0241938	NA
Hypertension	Overall	BiLEVE	MT-TQ	Q	tRNA glutamine	4336	rs41456348	T	C	C	40710	0.949259	0.0869494	0.549243	NA
Hypertension	noDM	BiLEVE	MT-TQ	Q	tRNA glutamine	4336	rs41456348	T	C	C	36138	1.00299	0.091063	0.973847	NA
Hypertension	DM	BiLEVE	MT-TQ	Q	tRNA glutamine	4336	rs41456348	T	C	C	4572	0.501405	0.283352	0.0148365	NA
Hypertension	Overall	UKB	MT-TQ	Q	tRNA glutamine	4336	rs41456348	T	C	C	336988	1.07623	0.0293862	0.0124229	NA
Hypertension	noDM	UKB	MT-TQ	Q	tRNA glutamine	4336	rs41456348	T	C	C	305239	1.06818	0.0303554	0.0297949	NA
Hypertension	DM	UKB	MT-TQ	Q	tRNA glutamine	4336	rs41456348	T	C	C	31749	1.19856	0.117876	0.124402	NA
Hypertension	Overall	UKB	MT-ND2	ND2	NADH dehydrogenase subunit 2	4529	-	A	T	T	337199	0.977357	0.0252518	0.364407	NA
Hypertension	noDM	UKB	MT-ND2	ND2	NADH dehydrogenase subunit 2	4529	-	A	T	T	305421	0.981749	0.0261583	0.481345	NA
Hypertension	DM	UKB	MT-ND2	ND2	NADH dehydrogenase subunit 2	4529	-	A	T	T	31778	0.919016	0.0963562	0.380785	NA
Hypertension	Overall	BiLEVE	MT-ND2	ND2	NADH dehydrogenase subunit 2	4561	-	T	C	C	40771	1.00034	0.122578	0.997819	NA
Hypertension	noDM	BiLEVE	MT-ND2	ND2	NADH dehydrogenase subunit 2	4561	-	T	C	C	36201	1.00391	0.126455	0.975369	NA
Hypertension	DM	BiLEVE	MT-ND2	ND2	NADH dehydrogenase subunit 2	4561	-	T	C	C	4570	0.944616	0.496597	0.908655	NA
Hypertension	Overall	UKB	MT-ND2	ND2	NADH dehydrogenase subunit 2	4561	-	T	C	C	337042	1.03108	0.0405951	0.450903	NA
Hypertension	noDM	UKB	MT-ND2	ND2	NADH dehydrogenase subunit 2	4561	-	T	C	C	305283	1.02448	0.0419668	0.564409	NA
Hypertension	DM	UKB	MT-ND2	ND2	NADH dehydrogenase subunit 2	4561	-	T	C	C	31759	1.13063	0.160724	0.44493	NA
Hypertension	Overall	BiLEVE	MT-ND2	ND2	NADH dehydrogenase subunit 2	4580	-	G	A	A	40660	0.943179	0.0743981	0.431694	NA
Hypertension	noDM	BiLEVE	MT-ND2	ND2	NADH dehydrogenase subunit 2	4580	-	G	A	A	36105	0.930123	0.0770424	0.347096	NA
Hypertension	DM	BiLEVE	MT-ND2	ND2	NADH dehydrogenase subunit 2	4580	-	G	A	A	4555	1.13173	0.292389	0.672139	NA
Hypertension	Overall	UKB	MT-ND2	ND2	NADH dehydrogenase subunit 2	4580	-	G	A	A	336190	0.96949	0.0246128	0.208057	NA
Hypertension	noDM	UKB	MT-ND2	ND2	NADH dehydrogenase subunit 2	4580	-	G	A	A	304516	0.968338	0.0254694	0.206503	NA
Hypertension	DM	UKB	MT-ND2	ND2	NADH dehydrogenase subunit 2	4580	-	G	A	A	31674	0.980466	0.0957713	0.836808	NA
Hypertension	Overall	BiLEVE	MT-ND2	ND2	NADH dehydrogenase subunit 2	4646	rs375312364	T	C	C	40781	1.01844	0.0899237	0.839004	NA
Hypertension	noDM	BiLEVE	MT-ND2	ND2	NADH dehydrogenase subunit 2	4646	rs375312364	T	C	C	36209	1.05884	0.0938369	0.542343	NA
Hypertension	DM	BiLEVE	MT-ND2	ND2	NADH dehydrogenase subunit 2	4646	rs375312364	T	C	C	4572	0.620675	0.306689	0.11991	NA
Hypertension	Overall	BiLEVE	MT-ND2	ND2	NADH dehydrogenase subunit 2	4769	rs3021086	G	A	A	40728	1.00046	0.0859769	0.995694	NA
Hypertension	noDM	BiLEVE	MT-ND2	ND2	NADH dehydrogenase subunit 2	4769	rs3021086	G	A	A	36163	1.01691	0.0893542	0.851161	NA
Hypertension	DM	BiLEVE	MT-ND2	ND2	NADH dehydrogenase subunit 2	4769	rs3021086	G	A	A	4565	0.782459	0.310942	0.43015	NA
Hypertension	Overall	UKB	MT-ND2	ND2	NADH dehydrogenase subunit 2	4769	rs3021086	G	A	A	337008	0.98375	0.0282434	0.561861	NA
Hypertension	noDM	UKB	MT-ND2	ND2	NADH dehydrogenase subunit 2	4769	rs3021086	G	A	A	305252	0.999022	0.0294169	0.973455	NA
Hypertension	DM	UKB	MT-ND2	ND2	NADH dehydrogenase subunit 2	4769	rs3021086	G	A	A	31756	0.824958	0.100294	0.0550364	NA
Hypertension	Overall	BiLEVE	MT-ND2	ND2	NADH dehydrogenase subunit 2	4793	-	A	G	G	40743	1.08598	0.117585	0.483025	NA
Hypertension	noDM	BiLEVE	MT-ND2	ND2	NADH dehydrogenase subunit 2	4793	-	A	G	G	36176	1.08103	0.121776	0.522303	NA
Hypertension	DM	BiLEVE	MT-ND2	ND2	NADH dehydrogenase subunit 2	4793	-	A	G	G	4567	1.15215	0.453729	0.754931	NA
Hypertension	Overall	UKB	MT-ND2	ND2	NADH dehydrogenase subunit 2	4793	-	A	G	G	337012	1.0634	0.0389454	0.114499	NA
Hypertension	noDM	UKB	MT-ND2	ND2	NADH dehydrogenase subunit 2	4793	-	A	G	G	305250	1.059	0.0402697	0.154607	NA
Hypertension	DM	UKB	MT-ND2	ND2	NADH dehydrogenase subunit 2	4793	-	A	G	G	31762	1.12892	0.153595	0.429829	NA
Hypertension	Overall	BiLEVE	MT-ND2	ND2	NADH dehydrogenase subunit 2	4917	rs28357980	A	G	G	40717	1.13178	0.0462606	0.00745004	NA
Hypertension	noDM	BiLEVE	MT-ND2	ND2	NADH dehydrogenase subunit 2	4917	rs28357980	A	G	G	36150	1.15047	0.0481207	0.00358122	NA
Hypertension	DM	BiLEVE	MT-ND2	ND2	NADH dehydrogenase subunit 2	4917	rs28357980	A	G	G	4567	0.906233	0.166336	0.553898	NA
Hypertension	Overall	UKB	MT-ND2	ND2	NADH dehydrogenase subunit 2	4917	rs28357980	A	G	G	336784	1.01468	0.0149787	0.330747	NA
Hypertension	noDM	UKB	MT-ND2	ND2	NADH dehydrogenase subunit 2	4917	rs28357980	A	G	G	305045	1.02464	0.0155266	0.117017	NA
Hypertension	DM	UKB	MT-ND2	ND2	NADH dehydrogenase subunit 2	4917	rs28357980	A	G	G	31739	0.888351	0.0564757	0.0360583	NA
Hypertension	Overall	BiLEVE	MT-ND2	ND2	NADH dehydrogenase subunit 2	5004	-	T	C	C	40759	1.13587	0.0938156	0.174479	NA
Hypertension	noDM	BiLEVE	MT-ND2	ND2	NADH dehydrogenase subunit 2	5004	-	T	C	C	36189	1.15453	0.0974574	0.14037	NA
Hypertension	DM	BiLEVE	MT-ND2	ND2	NADH dehydrogenase subunit 2	5004	-	T	C	C	4570	0.932175	0.342877	0.837698	NA
Hypertension	Overall	UKB	MT-ND2	ND2	NADH dehydrogenase subunit 2	5004	-	T	C	C	337074	1.0312	0.0314663	0.328852	NA
Hypertension	noDM	UKB	MT-ND2	ND2	NADH dehydrogenase subunit 2	5004	-	T	C	C	305304	1.02105	0.0324495	0.520894	NA
Hypertension	DM	UKB	MT-ND2	ND2	NADH dehydrogenase subunit 2	5004	-	T	C	C	31770	1.19904	0.12987	0.16219	NA
Hypertension	Overall	UKB	MT-ND2	ND2	NADH dehydrogenase subunit 2	5046	rs878927053	G	A	A	336596	1.02048	0.0323206	0.53051	NA
Hypertension	noDM	UKB	MT-ND2	ND2	NADH dehydrogenase subunit 2	5046	rs878927053	G	A	A	304871	1.01223	0.0333861	0.715795	NA
Hypertension	DM	UKB	MT-ND2	ND2	NADH dehydrogenase subunit 2	5046	rs878927053	G	A	A	31725	1.14531	0.129774	0.295808	NA
Hypertension	Overall	BiLEVE	MT-ND2	ND2	NADH dehydrogenase subunit 2	5147	rs367778601	G	A	A	40731	1.16256	0.0590439	0.0107381	NA
Hypertension	noDM	BiLEVE	MT-ND2	ND2	NADH dehydrogenase subunit 2	5147	rs367778601	G	A	A	36165	1.17097	0.0611596	0.00986276	NA
Hypertension	DM	BiLEVE	MT-ND2	ND2	NADH dehydrogenase subunit 2	5147	rs367778601	G	A	A	4566	1.04292	0.224839	0.851733	NA
Hypertension	Overall	UKB	MT-ND2	ND2	NADH dehydrogenase subunit 2	5147	rs367778601	G	A	A	337007	1.03407	0.0192704	0.082103	NA
Hypertension	noDM	UKB	MT-ND2	ND2	NADH dehydrogenase subunit 2	5147	rs367778601	G	A	A	305256	1.04123	0.0199626	0.0429926	NA
Hypertension	DM	UKB	MT-ND2	ND2	NADH dehydrogenase subunit 2	5147	rs367778601	G	A	A	31751	0.940571	0.0733103	0.403301	NA
Hypertension	Overall	UKB	MT-ND2	ND2	NADH dehydrogenase subunit 2	5390	rs41333444	A	G	G	337159	1.02322	0.0419629	0.584445	NA
Hypertension	noDM	UKB	MT-ND2	ND2	NADH dehydrogenase subunit 2	5390	rs41333444	A	G	G	305392	1.02256	0.0434787	0.60791	NA
Hypertension	DM	UKB	MT-ND2	ND2	NADH dehydrogenase subunit 2	5390	rs41333444	A	G	G	31767	1.03354	0.160283	0.836942	NA
Hypertension	Overall	UKB	MT-ND2	ND2	NADH dehydrogenase subunit 2	5495	rs3020602	T	C	C	336791	0.914124	0.0346981	0.00966122	NA
Hypertension	noDM	UKB	MT-ND2	ND2	NADH dehydrogenase subunit 2	5495	rs3020602	T	C	C	305051	0.939676	0.0360526	0.0843786	NA
Hypertension	DM	UKB	MT-ND2	ND2	NADH dehydrogenase subunit 2	5495	rs3020602	T	C	C	31740	0.63225	0.126076	0.000276404	NONE
Hypertension	Overall	BiLEVE	MT-NC4	NC4	non-coding nucleotides	5656	-	A	G	G	40764	1.00791	0.119287	0.94734	NA
Hypertension	noDM	BiLEVE	MT-NC4	NC4	non-coding nucleotides	5656	-	A	G	G	36195	1.03444	0.124036	0.784869	NA
Hypertension	DM	BiLEVE	MT-NC4	NC4	non-coding nucleotides	5656	-	A	G	G	4569	0.717368	0.430047	0.43988	NA
Hypertension	Overall	UKB	MT-NC4	NC4	non-coding nucleotides	5656	-	A	G	G	337090	1.02081	0.0404399	0.610593	NA
Hypertension	noDM	UKB	MT-NC4	NC4	non-coding nucleotides	5656	-	A	G	G	305320	1.01666	0.0420208	0.694226	NA
Hypertension	DM	UKB	MT-NC4	NC4	non-coding nucleotides	5656	-	A	G	G	31770	1.06829	0.149279	0.658131	NA
Hypertension	Overall	UKB	MT-CO1	COI	Cytochrome c oxidase subunit I	5999	rs879118820	T	C	C	336930	1.04503	0.0318107	0.16616	NA
Hypertension	noDM	UKB	MT-CO1	COI	Cytochrome c oxidase subunit I	5999	rs879118820	T	C	C	305178	1.05467	0.0330147	0.106883	NA
Hypertension	DM	UKB	MT-CO1	COI	Cytochrome c oxidase subunit I	5999	rs879118820	T	C	C	31752	0.928134	0.118129	0.527821	NA
Hypertension	Overall	UKB	MT-CO1	COI	Cytochrome c oxidase subunit I	6047	rs879104796	A	G	G	337079	1.05377	0.0318107	0.0996523	NA
Hypertension	noDM	UKB	MT-CO1	COI	Cytochrome c oxidase subunit I	6047	rs879104796	A	G	G	305320	1.06132	0.0329953	0.0712584	NA
Hypertension	DM	UKB	MT-CO1	COI	Cytochrome c oxidase subunit I	6047	rs879104796	A	G	G	31759	0.963983	0.119216	0.758317	NA
Hypertension	Overall	UKB	MT-CO1	COI	Cytochrome c oxidase subunit I	6221	rs370472320	T	C	C	336932	0.944151	0.035691	0.107355	NA
Hypertension	noDM	UKB	MT-CO1	COI	Cytochrome c oxidase subunit I	6221	rs370472320	T	C	C	305183	0.950606	0.0369125	0.169969	NA
Hypertension	DM	UKB	MT-CO1	COI	Cytochrome c oxidase subunit I	6221	rs370472320	T	C	C	31749	0.852304	0.138538	0.248681	NA
Hypertension	Overall	BiLEVE	MT-CO1	COI	Cytochrome c oxidase subunit I	6371	rs878870695	C	T	T	40729	1.2371	0.121046	0.0787904	NA
Hypertension	noDM	BiLEVE	MT-CO1	COI	Cytochrome c oxidase subunit I	6371	rs878870695	C	T	T	36161	1.21065	0.123727	0.122351	NA
Hypertension	DM	BiLEVE	MT-CO1	COI	Cytochrome c oxidase subunit I	6371	rs878870695	C	T	T	4568	1.99002	0.609851	0.259159	NA
Hypertension	Overall	UKB	MT-CO1	COI	Cytochrome c oxidase subunit I	6371	rs878870695	C	T	T	336713	0.948116	0.0372286	0.152398	NA
Hypertension	noDM	UKB	MT-CO1	COI	Cytochrome c oxidase subunit I	6371	rs878870695	C	T	T	304983	0.963503	0.0385563	0.334904	NA
Hypertension	DM	UKB	MT-CO1	COI	Cytochrome c oxidase subunit I	6371	rs878870695	C	T	T	31730	0.74718	0.140629	0.0382222	NA
Hypertension	Overall	BiLEVE	MT-CO1	COI	Cytochrome c oxidase subunit I	6734	-	G	A	A	40623	1.03159	0.134362	0.816926	NA
Hypertension	noDM	BiLEVE	MT-CO1	COI	Cytochrome c oxidase subunit I	6734	-	G	A	A	36070	1.02903	0.139674	0.83765	NA
Hypertension	DM	BiLEVE	MT-CO1	COI	Cytochrome c oxidase subunit I	6734	-	G	A	A	4553	1.11854	0.503538	0.823951	NA
Hypertension	Overall	UKB	MT-CO1	COI	Cytochrome c oxidase subunit I	6734	-	G	A	A	336319	0.941647	0.0428723	0.16079	NA
Hypertension	noDM	UKB	MT-CO1	COI	Cytochrome c oxidase subunit I	6734	-	G	A	A	304641	0.937376	0.0444101	0.145335	NA
Hypertension	DM	UKB	MT-CO1	COI	Cytochrome c oxidase subunit I	6734	-	G	A	A	31678	1.00907	0.165343	0.956457	NA
Hypertension	Overall	BiLEVE	MT-CO1	COI	Cytochrome c oxidase subunit I	6776	-	T	C	C	40749	0.927322	0.0586845	0.198524	NA
Hypertension	noDM	BiLEVE	MT-CO1	COI	Cytochrome c oxidase subunit I	6776	-	T	C	C	36180	0.905983	0.0606423	0.103495	NA
Hypertension	DM	BiLEVE	MT-CO1	COI	Cytochrome c oxidase subunit I	6776	-	T	C	C	4569	1.28573	0.242379	0.299777	NA
Hypertension	Overall	UKB	MT-CO1	COI	Cytochrome c oxidase subunit I	6776	-	T	C	C	336873	0.981986	0.0198076	0.358768	NA
Hypertension	noDM	UKB	MT-CO1	COI	Cytochrome c oxidase subunit I	6776	-	T	C	C	305125	0.978097	0.0205039	0.2801	NA
Hypertension	DM	UKB	MT-CO1	COI	Cytochrome c oxidase subunit I	6776	-	T	C	C	31748	1.045	0.0768575	0.566875	NA
Hypertension	Overall	BiLEVE	MT-CO1	COI	Cytochrome c oxidase subunit I	7028	-	T	C	C	40752	0.972999	0.0269806	0.310333	NA
Hypertension	noDM	BiLEVE	MT-CO1	COI	Cytochrome c oxidase subunit I	7028	-	T	C	C	36185	0.966898	0.0279859	0.229044	NA
Hypertension	DM	BiLEVE	MT-CO1	COI	Cytochrome c oxidase subunit I	7028	-	T	C	C	4567	1.05123	0.101993	0.62426	NA
Hypertension	Overall	UKB	MT-CO1	COI	Cytochrome c oxidase subunit I	7028	-	T	C	C	336933	0.998918	0.00899191	0.904147	NA
Hypertension	noDM	UKB	MT-CO1	COI	Cytochrome c oxidase subunit I	7028	-	T	C	C	305179	0.993138	0.00930387	0.459245	NA
Hypertension	DM	UKB	MT-CO1	COI	Cytochrome c oxidase subunit I	7028	-	T	C	C	31754	1.08637	0.0350008	0.0179452	NA
Hypertension	Overall	BiLEVE	MT-TS1	S(UCN)	tRNA serine 1	7476	rs201950015	C	T	T	40765	1.12088	0.0997846	0.252786	NA
Hypertension	noDM	BiLEVE	MT-TS1	S(UCN)	tRNA serine 1	7476	rs201950015	C	T	T	36193	1.14888	0.104659	0.18482	NA
Hypertension	DM	BiLEVE	MT-TS1	S(UCN)	tRNA serine 1	7476	rs201950015	C	T	T	4572	0.907877	0.329034	0.768966	NA
Hypertension	Overall	UKB	MT-TS1	S(UCN)	tRNA serine 1	7476	rs201950015	C	T	T	337160	1.03367	0.0333493	0.320751	NA
Hypertension	noDM	UKB	MT-TS1	S(UCN)	tRNA serine 1	7476	rs201950015	C	T	T	305390	1.03596	0.03448	0.305502	NA
Hypertension	DM	UKB	MT-TS1	S(UCN)	tRNA serine 1	7476	rs201950015	C	T	T	31770	0.999161	0.130802	0.99488	NA
Hypertension	Overall	BiLEVE	MT-CO2	COII	Cytochrome c oxidase subunit II	7768	rs41534044	A	G	G	40776	1.05585	0.0680637	0.424625	NA
Hypertension	noDM	BiLEVE	MT-CO2	COII	Cytochrome c oxidase subunit II	7768	rs41534044	A	G	G	36204	1.0552	0.07059	0.446545	NA
Hypertension	DM	BiLEVE	MT-CO2	COII	Cytochrome c oxidase subunit II	7768	rs41534044	A	G	G	4572	1.05549	0.25779	0.834065	NA
Hypertension	Overall	UKB	MT-CO2	COII	Cytochrome c oxidase subunit II	7768	rs41534044	A	G	G	337158	1.00249	0.0224522	0.911665	NA
Hypertension	noDM	UKB	MT-CO2	COII	Cytochrome c oxidase subunit II	7768	rs41534044	A	G	G	305386	0.994187	0.0232256	0.801797	NA
Hypertension	DM	UKB	MT-CO2	COII	Cytochrome c oxidase subunit II	7768	rs41534044	A	G	G	31772	1.12509	0.0882537	0.181717	NA
Hypertension	Overall	BiLEVE	MT-CO2	COII	Cytochrome c oxidase subunit II	8251	rs3021089	G	A	A	40747	0.970661	0.0574263	0.604077	NA
Hypertension	noDM	BiLEVE	MT-CO2	COII	Cytochrome c oxidase subunit II	8251	rs3021089	G	A	A	36176	0.94866	0.0592432	0.373659	NA
Hypertension	DM	BiLEVE	MT-CO2	COII	Cytochrome c oxidase subunit II	8251	rs3021089	G	A	A	4571	1.38468	0.242985	0.180421	NA
Hypertension	Overall	BiLEVE	MT-CO2	COII	Cytochrome c oxidase subunit II	8269	-	G	A	A	40738	1.0527	0.0747541	0.492075	NA
Hypertension	noDM	BiLEVE	MT-CO2	COII	Cytochrome c oxidase subunit II	8269	-	G	A	A	36170	1.07206	0.0779407	0.372014	NA
Hypertension	DM	BiLEVE	MT-CO2	COII	Cytochrome c oxidase subunit II	8269	-	G	A	A	4568	0.876084	0.262075	0.613704	NA
Hypertension	Overall	UKB	MT-CO2	COII	Cytochrome c oxidase subunit II	8269	-	G	A	A	336541	1.03205	0.0253466	0.213264	NA
Hypertension	noDM	UKB	MT-CO2	COII	Cytochrome c oxidase subunit II	8269	-	G	A	A	304833	1.02842	0.0261533	0.28395	NA
Hypertension	DM	UKB	MT-CO2	COII	Cytochrome c oxidase subunit II	8269	-	G	A	A	31708	1.07979	0.102878	0.455566	NA
Hypertension	Overall	UKB	MT-ATP8	ATPase8	ATP synthase F0 subunit 8	8448	rs879056797	T	C	C	337206	1.00831	0.0403171	0.837398	NA
Hypertension	noDM	UKB	MT-ATP8	ATPase8	ATP synthase F0 subunit 8	8448	rs879056797	T	C	C	305429	1.00237	0.0416058	0.954544	NA
Hypertension	DM	UKB	MT-ATP8	ATPase8	ATP synthase F0 subunit 8	8448	rs879056797	T	C	C	31777	1.10335	0.163868	0.54839	NA
Hypertension	Overall	BiLEVE	MT-ATP6	ATPase6	ATP synthase F0 subunit 6	8697	rs879233543	G	A	A	40715	1.11386	0.0460259	0.0191371	NA
Hypertension	noDM	BiLEVE	MT-ATP6	ATPase6	ATP synthase F0 subunit 6	8697	rs879233543	G	A	A	36150	1.13588	0.0479102	0.00783036	NA
Hypertension	DM	BiLEVE	MT-ATP6	ATPase6	ATP synthase F0 subunit 6	8697	rs879233543	G	A	A	4565	0.858667	0.163884	0.352492	NA
Hypertension	Overall	UKB	MT-ATP6	ATPase6	ATP synthase F0 subunit 6	8697	rs879233543	G	A	A	336835	1.01922	0.0149752	0.203668	NA
Hypertension	noDM	UKB	MT-ATP6	ATPase6	ATP synthase F0 subunit 6	8697	rs879233543	G	A	A	305097	1.02924	0.0155236	0.0633873	NA
Hypertension	DM	UKB	MT-ATP6	ATPase6	ATP synthase F0 subunit 6	8697	rs879233543	G	A	A	31738	0.89213	0.0564416	0.0431425	NA
Hypertension	Overall	BiLEVE	MT-ATP6	ATPase6	ATP synthase F0 subunit 6	8994	rs28358887,COSM6716156,COSM6716157	G	A	A	40600	0.949411	0.0903855	0.565728	NA
Hypertension	noDM	BiLEVE	MT-ATP6	ATPase6	ATP synthase F0 subunit 6	8994	rs28358887,COSM6716156,COSM6716157	G	A	A	36048	0.933986	0.0942813	0.46884	NA
Hypertension	DM	BiLEVE	MT-ATP6	ATPase6	ATP synthase F0 subunit 6	8994	rs28358887,COSM6716156,COSM6716157	G	A	A	4552	1.12592	0.323574	0.713977	NA
Hypertension	Overall	UKB	MT-ATP6	ATPase6	ATP synthase F0 subunit 6	8994	rs28358887,COSM6716156,COSM6716157	G	A	A	337151	1.00618	0.0301959	0.838406	NA
Hypertension	noDM	UKB	MT-ATP6	ATPase6	ATP synthase F0 subunit 6	8994	rs28358887,COSM6716156,COSM6716157	G	A	A	305386	1.00067	0.0312134	0.982797	NA
Hypertension	DM	UKB	MT-ATP6	ATPase6	ATP synthase F0 subunit 6	8994	rs28358887,COSM6716156,COSM6716157	G	A	A	31765	1.0832	0.119641	0.50412	NA
Hypertension	Overall	BiLEVE	MT-ATP6	ATPase6	ATP synthase F0 subunit 6	9055	rs193303045	G	A	A	40734	0.997473	0.0467243	0.956816	NA
Hypertension	noDM	BiLEVE	MT-ATP6	ATPase6	ATP synthase F0 subunit 6	9055	rs193303045	G	A	A	36166	1.00584	0.0484165	0.904298	NA
Hypertension	DM	BiLEVE	MT-ATP6	ATPase6	ATP synthase F0 subunit 6	9055	rs193303045	G	A	A	4568	0.878283	0.177557	0.464806	NA
Hypertension	Overall	UKB	MT-ATP6	ATPase6	ATP synthase F0 subunit 6	9055	rs193303045	G	A	A	336579	0.98528	0.0155281	0.339573	NA
Hypertension	noDM	UKB	MT-ATP6	ATPase6	ATP synthase F0 subunit 6	9055	rs193303045	G	A	A	304874	0.983137	0.0160548	0.289459	NA
Hypertension	DM	UKB	MT-ATP6	ATPase6	ATP synthase F0 subunit 6	9055	rs193303045	G	A	A	31705	1.01525	0.0610724	0.804222	NA
Hypertension	Overall	UKB	MT-ATP6	ATPase6	ATP synthase F0 subunit 6	9123	COSM1155692,COSM1155693	G	A	A	336946	1.02316	0.032026	0.474703	NA
Hypertension	noDM	UKB	MT-ATP6	ATPase6	ATP synthase F0 subunit 6	9123	COSM1155692,COSM1155693	G	A	A	305190	1.01303	0.0330225	0.694945	NA
Hypertension	DM	UKB	MT-ATP6	ATPase6	ATP synthase F0 subunit 6	9123	COSM1155692,COSM1155693	G	A	A	31756	1.19087	0.132452	0.187223	NA
Hypertension	Overall	BiLEVE	MT-CO3	COIII	Cytochrome c oxidase subunit III	9477	rs2853825	G	A	A	40754	0.938565	0.0456188	0.164576	NA
Hypertension	noDM	BiLEVE	MT-CO3	COIII	Cytochrome c oxidase subunit III	9477	rs2853825	G	A	A	36186	0.94019	0.047444	0.193631	NA
Hypertension	DM	BiLEVE	MT-CO3	COIII	Cytochrome c oxidase subunit III	9477	rs2853825	G	A	A	4568	0.940299	0.166924	0.712295	NA
Hypertension	Overall	UKB	MT-CO3	COIII	Cytochrome c oxidase subunit III	9667	rs41482146	A	G	G	336916	1.06222	0.040527	0.136398	NA
Hypertension	noDM	UKB	MT-CO3	COIII	Cytochrome c oxidase subunit III	9667	rs41482146	A	G	G	305159	1.06718	0.0419993	0.121615	NA
Hypertension	DM	UKB	MT-CO3	COIII	Cytochrome c oxidase subunit III	9667	rs41482146	A	G	G	31757	0.997845	0.153833	0.988811	NA
Hypertension	Overall	BiLEVE	MT-CO3	COIII	Cytochrome c oxidase subunit III	9698	-	T	C	C	40641	1.02118	0.0481801	0.663501	NA
Hypertension	noDM	BiLEVE	MT-CO3	COIII	Cytochrome c oxidase subunit III	9698	-	T	C	C	36084	1.02292	0.0498342	0.649316	NA
Hypertension	DM	BiLEVE	MT-CO3	COIII	Cytochrome c oxidase subunit III	9698	-	T	C	C	4557	0.980704	0.188874	0.917836	NA
Hypertension	Overall	UKB	MT-CO3	COIII	Cytochrome c oxidase subunit III	9698	-	T	C	C	336172	0.988071	0.0158904	0.450119	NA
Hypertension	noDM	UKB	MT-CO3	COIII	Cytochrome c oxidase subunit III	9698	-	T	C	C	304508	0.985682	0.0164269	0.379978	NA
Hypertension	DM	UKB	MT-CO3	COIII	Cytochrome c oxidase subunit III	9698	-	T	C	C	31664	1.02223	0.0626598	0.725724	NA
Hypertension	Overall	BiLEVE	MT-CO3	COIII	Cytochrome c oxidase subunit III	9716	rs41502750	T	C	C	40773	0.879024	0.104809	0.218598	NA
Hypertension	noDM	BiLEVE	MT-CO3	COIII	Cytochrome c oxidase subunit III	9716	rs41502750	T	C	C	36200	0.865948	0.108034	0.182774	NA
Hypertension	DM	BiLEVE	MT-CO3	COIII	Cytochrome c oxidase subunit III	9716	rs41502750	T	C	C	4573	1.15918	0.448436	0.741852	NA
Hypertension	Overall	UKB	MT-CO3	COIII	Cytochrome c oxidase subunit III	9716	rs41502750	T	C	C	337132	0.973186	0.0355895	0.445047	NA
Hypertension	noDM	UKB	MT-CO3	COIII	Cytochrome c oxidase subunit III	9716	rs41502750	T	C	C	305363	0.969189	0.0368435	0.395645	NA
Hypertension	DM	UKB	MT-CO3	COIII	Cytochrome c oxidase subunit III	9716	rs41502750	T	C	C	31769	1.03206	0.13784	0.818938	NA
Hypertension	Overall	UKB	MT-CO3	COIII	Cytochrome c oxidase subunit III	9899	rs41345446	T	C	C	337071	0.950658	0.0333593	0.129303	NA
Hypertension	noDM	UKB	MT-CO3	COIII	Cytochrome c oxidase subunit III	9899	rs41345446	T	C	C	305313	0.950677	0.0345506	0.143204	NA
Hypertension	DM	UKB	MT-CO3	COIII	Cytochrome c oxidase subunit III	9899	rs41345446	T	C	C	31758	0.956939	0.128191	0.731327	NA
Hypertension	Overall	BiLEVE	MT-ND3	ND3	NADH dehydrogenase subunit 3	10238	-	T	C	C	40655	1.01855	0.073562	0.802705	NA
Hypertension	noDM	BiLEVE	MT-ND3	ND3	NADH dehydrogenase subunit 3	10238	-	T	C	C	36101	0.992481	0.0753862	0.920256	NA
Hypertension	DM	BiLEVE	MT-ND3	ND3	NADH dehydrogenase subunit 3	10238	-	T	C	C	4554	1.68459	0.360395	0.147871	NA
Hypertension	Overall	UKB	MT-ND3	ND3	NADH dehydrogenase subunit 3	10238	-	T	C	C	336662	0.975603	0.0242817	0.309051	NA
Hypertension	noDM	UKB	MT-ND3	ND3	NADH dehydrogenase subunit 3	10238	-	T	C	C	304931	0.978059	0.025135	0.377421	NA
Hypertension	DM	UKB	MT-ND3	ND3	NADH dehydrogenase subunit 3	10238	-	T	C	C	31731	0.942164	0.0936758	0.524789	NA
Hypertension	Overall	BiLEVE	MT-ND3	ND3	NADH dehydrogenase subunit 3	10398	rs2853826	A	G	G	40611	0.984597	0.0326916	0.634919	NA
Hypertension	noDM	BiLEVE	MT-ND3	ND3	NADH dehydrogenase subunit 3	10398	rs2853826	A	G	G	36062	0.994314	0.0339019	0.866423	NA
Hypertension	DM	BiLEVE	MT-ND3	ND3	NADH dehydrogenase subunit 3	10398	rs2853826	A	G	G	4549	0.867883	0.123218	0.250151	NA
Hypertension	Overall	UKB	MT-ND3	ND3	NADH dehydrogenase subunit 3	10398	rs2853826	A	G	G	335709	0.996104	0.0109792	0.722155	NA
Hypertension	noDM	UKB	MT-ND3	ND3	NADH dehydrogenase subunit 3	10398	rs2853826	A	G	G	304085	0.996972	0.0113611	0.789535	NA
Hypertension	DM	UKB	MT-ND3	ND3	NADH dehydrogenase subunit 3	10398	rs2853826	A	G	G	31624	0.980576	0.0426034	0.645217	NA
Hypertension	Overall	UKB	MT-ND3	ND3	NADH dehydrogenase subunit 3	10400	rs28358278	C	T	T	337059	1.09882	0.11672	0.419466	NA
Hypertension	noDM	UKB	MT-ND3	ND3	NADH dehydrogenase subunit 3	10400	rs28358278	C	T	T	305291	1.01213	0.118169	0.9187	NA
Hypertension	DM	UKB	MT-ND3	ND3	NADH dehydrogenase subunit 3	10400	rs28358278	C	T	T	31768	16.0198	1.45186	0.0560643	NA
Hypertension	Overall	BiLEVE	MT-TR	R	tRNA arginine	10463	rs28358279	T	C	C	40662	1.08129	0.0442663	0.0774703	NA
Hypertension	noDM	BiLEVE	MT-TR	R	tRNA arginine	10463	rs28358279	T	C	C	36099	1.09918	0.0460263	0.0399174	NA
Hypertension	DM	BiLEVE	MT-TR	R	tRNA arginine	10463	rs28358279	T	C	C	4563	0.859315	0.159974	0.343244	NA
Hypertension	Overall	UKB	MT-TR	R	tRNA arginine	10463	rs28358279	T	C	C	336318	1.01977	0.014576	0.179184	NA
Hypertension	noDM	UKB	MT-TR	R	tRNA arginine	10463	rs28358279	T	C	C	304616	1.02784	0.0151027	0.0690708	NA
Hypertension	DM	UKB	MT-TR	R	tRNA arginine	10463	rs28358279	T	C	C	31702	0.914987	0.0553362	0.108371	NA
Hypertension	Overall	BiLEVE	MT-ND4L	ND4L	NADH dehydrogenase subunit 4L	10550	rs28358280	A	G	G	40765	1.01752	0.0479959	0.717401	NA
Hypertension	noDM	BiLEVE	MT-ND4L	ND4L	NADH dehydrogenase subunit 4L	10550	rs28358280	A	G	G	36193	1.02331	0.0496895	0.642781	NA
Hypertension	DM	BiLEVE	MT-ND4L	ND4L	NADH dehydrogenase subunit 4L	10550	rs28358280	A	G	G	4572	0.926821	0.184958	0.681162	NA
Hypertension	Overall	UKB	MT-ND4L	ND4L	NADH dehydrogenase subunit 4L	10550	rs28358280	A	G	G	337113	0.987298	0.0158873	0.421027	NA
Hypertension	noDM	UKB	MT-ND4L	ND4L	NADH dehydrogenase subunit 4L	10550	rs28358280	A	G	G	305357	0.985576	0.0164278	0.376464	NA
Hypertension	DM	UKB	MT-ND4L	ND4L	NADH dehydrogenase subunit 4L	10550	rs28358280	A	G	G	31756	1.01116	0.0623757	0.858768	NA
Hypertension	Overall	UKB	MT-ND4	ND4	NADH dehydrogenase subunit 4	10819	rs28358283	A	G	G	337099	0.966412	0.0519406	0.510684	NA
Hypertension	noDM	UKB	MT-ND4	ND4	NADH dehydrogenase subunit 4	10819	rs28358283	A	G	G	305322	0.976224	0.0538309	0.654861	NA
Hypertension	DM	UKB	MT-ND4	ND4	NADH dehydrogenase subunit 4	10819	rs28358283	A	G	G	31777	0.84121	0.195867	0.377336	NA
Hypertension	Overall	UKB	MT-ND4	ND4	NADH dehydrogenase subunit 4	10873	rs2857284	T	C	C	336914	0.948609	0.0714358	0.460182	NA
Hypertension	noDM	UKB	MT-ND4	ND4	NADH dehydrogenase subunit 4	10873	rs2857284	T	C	C	305161	0.915421	0.0733549	0.228317	NA
Hypertension	DM	UKB	MT-ND4	ND4	NADH dehydrogenase subunit 4	10873	rs2857284	T	C	C	31753	1.71561	0.339437	0.11179	NA
Hypertension	Overall	UKB	MT-ND4	ND4	NADH dehydrogenase subunit 4	10915	rs2857285	T	C	C	336976	0.93218	0.0397677	0.0773978	NA
Hypertension	noDM	UKB	MT-ND4	ND4	NADH dehydrogenase subunit 4	10915	rs2857285	T	C	C	305220	0.925688	0.0411527	0.0606024	NA
Hypertension	DM	UKB	MT-ND4	ND4	NADH dehydrogenase subunit 4	10915	rs2857285	T	C	C	31756	1.03625	0.155803	0.819229	NA
Hypertension	Overall	BiLEVE	MT-ND4	ND4	NADH dehydrogenase subunit 4	11251	rs869096886,COSM1138232	A	G	G	40671	1.02916	0.0330032	0.383848	NA
Hypertension	noDM	BiLEVE	MT-ND4	ND4	NADH dehydrogenase subunit 4	11251	rs869096886,COSM1138232	A	G	G	36111	1.04607	0.0343158	0.189383	NA
Hypertension	DM	BiLEVE	MT-ND4	ND4	NADH dehydrogenase subunit 4	11251	rs869096886,COSM1138232	A	G	G	4560	0.844392	0.120105	0.159056	NA
Hypertension	Overall	UKB	MT-ND4	ND4	NADH dehydrogenase subunit 4	11251	rs869096886,COSM1138232	A	G	G	336334	1.00941	0.0110089	0.394803	NA
Hypertension	noDM	UKB	MT-ND4	ND4	NADH dehydrogenase subunit 4	11251	rs869096886,COSM1138232	A	G	G	304634	1.0165	0.0114041	0.15135	NA
Hypertension	DM	UKB	MT-ND4	ND4	NADH dehydrogenase subunit 4	11251	rs869096886,COSM1138232	A	G	G	31700	0.915049	0.0419985	0.0345293	NA
Hypertension	Overall	BiLEVE	MT-ND4	ND4	NADH dehydrogenase subunit 4	11299	rs28358285	T	C	C	40765	1.00818	0.0477582	0.864565	NA
Hypertension	noDM	BiLEVE	MT-ND4	ND4	NADH dehydrogenase subunit 4	11299	rs28358285	T	C	C	36198	1.01506	0.0494586	0.762516	NA
Hypertension	DM	BiLEVE	MT-ND4	ND4	NADH dehydrogenase subunit 4	11299	rs28358285	T	C	C	4567	0.90759	0.183164	0.596544	NA
Hypertension	Overall	UKB	MT-ND4	ND4	NADH dehydrogenase subunit 4	11299	rs28358285	T	C	C	337098	0.98158	0.0158174	0.239825	NA
Hypertension	noDM	UKB	MT-ND4	ND4	NADH dehydrogenase subunit 4	11299	rs28358285	T	C	C	305336	0.979787	0.0163561	0.21185	NA
Hypertension	DM	UKB	MT-ND4	ND4	NADH dehydrogenase subunit 4	11299	rs28358285	T	C	C	31762	1.00659	0.062074	0.915787	NA
Hypertension	Overall	UKB	MT-ND4	ND4	NADH dehydrogenase subunit 4	11332	rs55714831	C	T	T	337122	1.05498	0.0317707	0.0920657	NA
Hypertension	noDM	UKB	MT-ND4	ND4	NADH dehydrogenase subunit 4	11332	rs55714831	C	T	T	305360	1.06204	0.0329406	0.067676	NA
Hypertension	DM	UKB	MT-ND4	ND4	NADH dehydrogenase subunit 4	11332	rs55714831	C	T	T	31762	0.969564	0.119699	0.796235	NA
Hypertension	Overall	BiLEVE	MT-ND4	ND4	NADH dehydrogenase subunit 4	11377	rs193302938	G	A	A	40723	1.0553	0.102895	0.600929	NA
Hypertension	noDM	BiLEVE	MT-ND4	ND4	NADH dehydrogenase subunit 4	11377	rs193302938	G	A	A	36163	1.04996	0.107182	0.649196	NA
Hypertension	DM	BiLEVE	MT-ND4	ND4	NADH dehydrogenase subunit 4	11377	rs193302938	G	A	A	4560	1.16241	0.372042	0.685839	NA
Hypertension	Overall	UKB	MT-ND4	ND4	NADH dehydrogenase subunit 4	11377	rs193302938	G	A	A	336520	1.03472	0.0341155	0.317152	NA
Hypertension	noDM	UKB	MT-ND4	ND4	NADH dehydrogenase subunit 4	11377	rs193302938	G	A	A	304799	1.05513	0.035425	0.129838	NA
Hypertension	DM	UKB	MT-ND4	ND4	NADH dehydrogenase subunit 4	11377	rs193302938	G	A	A	31721	0.792493	0.124856	0.0625021	NA
Hypertension	Overall	BiLEVE	MT-ND4	ND4	NADH dehydrogenase subunit 4	11467	rs2853493,COSM6716752,COSM6716753	A	G	G	40684	0.993488	0.0321012	0.83872	NA
Hypertension	noDM	BiLEVE	MT-ND4	ND4	NADH dehydrogenase subunit 4	11467	rs2853493,COSM6716752,COSM6716753	A	G	G	36122	0.996634	0.0332975	0.919342	NA
Hypertension	DM	BiLEVE	MT-ND4	ND4	NADH dehydrogenase subunit 4	11467	rs2853493,COSM6716752,COSM6716753	A	G	G	4562	0.956502	0.120955	0.713115	NA
Hypertension	Overall	UKB	MT-ND4	ND4	NADH dehydrogenase subunit 4	11467	rs2853493,COSM6716752,COSM6716753	A	G	G	336463	1.00443	0.0107259	0.679967	NA
Hypertension	noDM	UKB	MT-ND4	ND4	NADH dehydrogenase subunit 4	11467	rs2853493,COSM6716752,COSM6716753	A	G	G	304757	1.00556	0.0111019	0.617719	NA
Hypertension	DM	UKB	MT-ND4	ND4	NADH dehydrogenase subunit 4	11467	rs2853493,COSM6716752,COSM6716753	A	G	G	31706	0.98957	0.0414653	0.800379	NA
Hypertension	Overall	BiLEVE	MT-ND4	ND4	NADH dehydrogenase subunit 4	11485	-	T	C	C	40738	0.941175	0.0943616	0.52056	NA
Hypertension	noDM	BiLEVE	MT-ND4	ND4	NADH dehydrogenase subunit 4	11485	-	T	C	C	36167	0.984375	0.0995698	0.874328	NA
Hypertension	DM	BiLEVE	MT-ND4	ND4	NADH dehydrogenase subunit 4	11485	-	T	C	C	4571	0.578074	0.290691	0.059383	NA
Hypertension	Overall	BiLEVE	MT-ND4	ND4	NADH dehydrogenase subunit 4	11674	rs28358286	C	T	T	40758	0.929345	0.0961192	0.445861	NA
Hypertension	noDM	BiLEVE	MT-ND4	ND4	NADH dehydrogenase subunit 4	11674	rs28358286	C	T	T	36189	0.925781	0.100541	0.443067	NA
Hypertension	DM	BiLEVE	MT-ND4	ND4	NADH dehydrogenase subunit 4	11674	rs28358286	C	T	T	4569	0.973768	0.330203	0.935837	NA
Hypertension	Overall	UKB	MT-ND4	ND4	NADH dehydrogenase subunit 4	11674	rs28358286	C	T	T	337203	1.01831	0.0321715	0.572679	NA
Hypertension	noDM	UKB	MT-ND4	ND4	NADH dehydrogenase subunit 4	11674	rs28358286	C	T	T	305424	1.01357	0.0332495	0.685203	NA
Hypertension	DM	UKB	MT-ND4	ND4	NADH dehydrogenase subunit 4	11674	rs28358286	C	T	T	31779	1.08513	0.127714	0.522379	NA
Hypertension	Overall	BiLEVE	MT-ND4	ND4	NADH dehydrogenase subunit 4	11719	rs2853495	A	G	G	40733	0.970266	0.0268052	0.260137	NA
Hypertension	noDM	BiLEVE	MT-ND4	ND4	NADH dehydrogenase subunit 4	11719	rs2853495	A	G	G	36167	0.961125	0.0278075	0.153898	NA
Hypertension	DM	BiLEVE	MT-ND4	ND4	NADH dehydrogenase subunit 4	11719	rs2853495	A	G	G	4566	1.09071	0.101124	0.390543	NA
Hypertension	Overall	BiLEVE	MT-ND4	ND4	NADH dehydrogenase subunit 4	11812	rs3088053	A	G	G	40739	1.12563	0.0504657	0.0190262	NA
Hypertension	noDM	BiLEVE	MT-ND4	ND4	NADH dehydrogenase subunit 4	11812	rs3088053	A	G	G	36170	1.135	0.0523638	0.0155917	NA
Hypertension	DM	BiLEVE	MT-ND4	ND4	NADH dehydrogenase subunit 4	11812	rs3088053	A	G	G	4569	1.01373	0.188028	0.942201	NA
Hypertension	Overall	UKB	MT-ND4	ND4	NADH dehydrogenase subunit 4	11812	rs3088053	A	G	G	336974	1.0315	0.0165411	0.0608301	NA
Hypertension	noDM	UKB	MT-ND4	ND4	NADH dehydrogenase subunit 4	11812	rs3088053	A	G	G	305220	1.04374	0.017152	0.0125617	NA
Hypertension	DM	UKB	MT-ND4	ND4	NADH dehydrogenase subunit 4	11812	rs3088053	A	G	G	31754	0.87772	0.0619893	0.0353756	NA
Hypertension	Overall	UKB	MT-ND4	ND4	NADH dehydrogenase subunit 4	11914	rs2853496,COSM1155517	G	A	A	336356	0.991738	0.0337083	0.805594	NA
Hypertension	noDM	UKB	MT-ND4	ND4	NADH dehydrogenase subunit 4	11914	rs2853496,COSM1155517	G	A	A	304666	0.995638	0.0349052	0.900344	NA
Hypertension	DM	UKB	MT-ND4	ND4	NADH dehydrogenase subunit 4	11914	rs2853496,COSM1155517	G	A	A	31690	0.946101	0.129447	0.668638	NA
Hypertension	Overall	UKB	MT-ND4	ND4	NADH dehydrogenase subunit 4	11947	rs28359168	A	G	G	337098	1.01007	0.0327528	0.759712	NA
Hypertension	noDM	UKB	MT-ND4	ND4	NADH dehydrogenase subunit 4	11947	rs28359168	A	G	G	305330	1.00509	0.0338615	0.880801	NA
Hypertension	DM	UKB	MT-ND4	ND4	NADH dehydrogenase subunit 4	11947	rs28359168	A	G	G	31768	1.07927	0.129436	0.555625	NA
Hypertension	Overall	BiLEVE	MT-TL2	L(CUN)	tRNA leucine2	12308	rs2853498	A	G	G	40766	0.995697	0.0320392	0.892927	NA
Hypertension	noDM	BiLEVE	MT-TL2	L(CUN)	tRNA leucine2	12308	rs2853498	A	G	G	36194	1.00013	0.0332416	0.996835	NA
Hypertension	DM	BiLEVE	MT-TL2	L(CUN)	tRNA leucine2	12308	rs2853498	A	G	G	4572	0.942564	0.120254	0.622799	NA
Hypertension	Overall	BiLEVE	MT-ND5	ND5	NADH dehydrogenase subunit 5	12372	rs2853499	G	A	A	40744	0.996096	0.0320343	0.902809	NA
Hypertension	noDM	BiLEVE	MT-ND5	ND5	NADH dehydrogenase subunit 5	12372	rs2853499	G	A	A	36172	1.00043	0.033237	0.989731	NA
Hypertension	DM	BiLEVE	MT-ND5	ND5	NADH dehydrogenase subunit 5	12372	rs2853499	G	A	A	4572	0.943934	0.120221	0.63127	NA
Hypertension	Overall	UKB	MT-ND5	ND5	NADH dehydrogenase subunit 5	12372	rs2853499	G	A	A	336877	1.00342	0.0106968	0.749596	NA
Hypertension	noDM	UKB	MT-ND5	ND5	NADH dehydrogenase subunit 5	12372	rs2853499	G	A	A	305135	1.00455	0.011071	0.681682	NA
Hypertension	DM	UKB	MT-ND5	ND5	NADH dehydrogenase subunit 5	12372	rs2853499	G	A	A	31742	0.988116	0.0413924	0.772715	NA
Hypertension	Overall	BiLEVE	MT-ND5	ND5	NADH dehydrogenase subunit 5	12501	rs28397767	G	A	A	40758	1.02141	0.0724326	0.769901	NA
Hypertension	noDM	BiLEVE	MT-ND5	ND5	NADH dehydrogenase subunit 5	12501	rs28397767	G	A	A	36190	0.99221	0.0742168	0.916079	NA
Hypertension	DM	BiLEVE	MT-ND5	ND5	NADH dehydrogenase subunit 5	12501	rs28397767	G	A	A	4568	1.77048	0.359251	0.111808	NA
Hypertension	Overall	UKB	MT-ND5	ND5	NADH dehydrogenase subunit 5	12501	rs28397767	G	A	A	336805	0.978568	0.0239399	0.365474	NA
Hypertension	noDM	UKB	MT-ND5	ND5	NADH dehydrogenase subunit 5	12501	rs28397767	G	A	A	305067	0.981058	0.0247748	0.440184	NA
Hypertension	DM	UKB	MT-ND5	ND5	NADH dehydrogenase subunit 5	12501	rs28397767	G	A	A	31738	0.942374	0.0926524	0.521785	NA
Hypertension	Overall	BiLEVE	MT-ND5	ND5	NADH dehydrogenase subunit 5	12612	rs28359172	A	G	G	40699	0.951497	0.04181	0.234375	NA
Hypertension	noDM	BiLEVE	MT-ND5	ND5	NADH dehydrogenase subunit 5	12612	rs28359172	A	G	G	36140	0.962644	0.0434882	0.381335	NA
Hypertension	DM	BiLEVE	MT-ND5	ND5	NADH dehydrogenase subunit 5	12612	rs28359172	A	G	G	4559	0.845112	0.151673	0.267201	NA
Hypertension	Overall	UKB	MT-ND5	ND5	NADH dehydrogenase subunit 5	12612	rs28359172	A	G	G	336474	0.999297	0.0142418	0.960608	NA
Hypertension	noDM	UKB	MT-ND5	ND5	NADH dehydrogenase subunit 5	12612	rs28359172	A	G	G	304773	1.00271	0.0147511	0.854225	NA
Hypertension	DM	UKB	MT-ND5	ND5	NADH dehydrogenase subunit 5	12612	rs28359172	A	G	G	31701	0.950676	0.0544646	0.353041	NA
Hypertension	Overall	BiLEVE	MT-ND5	ND5	NADH dehydrogenase subunit 5	12633	rs3926883	C	A	A	40668	1.07861	0.10334	0.464001	NA
Hypertension	noDM	BiLEVE	MT-ND5	ND5	NADH dehydrogenase subunit 5	12633	rs3926883	C	A	A	36113	1.12703	0.10863	0.270944	NA
Hypertension	DM	BiLEVE	MT-ND5	ND5	NADH dehydrogenase subunit 5	12633	rs3926883	C	A	A	4555	0.612487	0.32721	0.134079	NA
Hypertension	Overall	UKB	MT-ND5	ND5	NADH dehydrogenase subunit 5	12633	rs3926883	C	A	A	337019	0.959922	0.0321028	0.202621	NA
Hypertension	noDM	UKB	MT-ND5	ND5	NADH dehydrogenase subunit 5	12633	rs3926883	C	A	A	305248	0.960319	0.0332475	0.223291	NA
Hypertension	DM	UKB	MT-ND5	ND5	NADH dehydrogenase subunit 5	12633	rs3926883	C	A	A	31771	0.958504	0.123341	0.731136	NA
Hypertension	Overall	BiLEVE	MT-ND5	ND5	NADH dehydrogenase subunit 5	12705	rs193302956,COSM1155526	C	T	T	40715	1.03869	0.0526151	0.470583	NA
Hypertension	noDM	BiLEVE	MT-ND5	ND5	NADH dehydrogenase subunit 5	12705	rs193302956,COSM1155526	C	T	T	36147	1.02686	0.0543491	0.625803	NA
Hypertension	DM	BiLEVE	MT-ND5	ND5	NADH dehydrogenase subunit 5	12705	rs193302956,COSM1155526	C	T	T	4568	1.23967	0.213551	0.314384	NA
Hypertension	Overall	UKB	MT-ND5	ND5	NADH dehydrogenase subunit 5	12705	rs193302956,COSM1155526	C	T	T	336869	0.981315	0.0171695	0.271955	NA
Hypertension	noDM	UKB	MT-ND5	ND5	NADH dehydrogenase subunit 5	12705	rs193302956,COSM1155526	C	T	T	305130	0.981121	0.0177532	0.283	NA
Hypertension	DM	UKB	MT-ND5	ND5	NADH dehydrogenase subunit 5	12705	rs193302956,COSM1155526	C	T	T	31739	0.98037	0.0673797	0.768587	NA
Hypertension	Overall	UKB	MT-ND5	ND5	NADH dehydrogenase subunit 5	13020	rs75577869	T	C	C	337041	1.02208	0.0397577	0.582836	NA
Hypertension	noDM	UKB	MT-ND5	ND5	NADH dehydrogenase subunit 5	13020	rs75577869	T	C	C	305284	1.02071	0.0411525	0.618429	NA
Hypertension	DM	UKB	MT-ND5	ND5	NADH dehydrogenase subunit 5	13020	rs75577869	T	C	C	31757	1.04364	0.15397	0.781449	NA
Hypertension	Overall	UKB	MT-ND5	ND5	NADH dehydrogenase subunit 5	13104	rs878871104	A	G	G	336025	0.95947	0.0451504	0.359472	NA
Hypertension	noDM	UKB	MT-ND5	ND5	NADH dehydrogenase subunit 5	13104	rs878871104	A	G	G	304370	0.945807	0.046607	0.231908	NA
Hypertension	DM	UKB	MT-ND5	ND5	NADH dehydrogenase subunit 5	13104	rs878871104	A	G	G	31655	1.17359	0.185168	0.387338	NA
Hypertension	Overall	BiLEVE	MT-ND5	ND5	NADH dehydrogenase subunit 5	13105	rs2853501,COSM6716789	A	G	G	40694	0.843302	0.11954	0.153948	NA
Hypertension	noDM	BiLEVE	MT-ND5	ND5	NADH dehydrogenase subunit 5	13105	rs2853501,COSM6716789	A	G	G	36134	0.837335	0.12406	0.152429	NA
Hypertension	DM	BiLEVE	MT-ND5	ND5	NADH dehydrogenase subunit 5	13105	rs2853501,COSM6716789	A	G	G	4560	0.91115	0.45077	0.836464	NA
Hypertension	Overall	UKB	MT-ND5	ND5	NADH dehydrogenase subunit 5	13105	rs2853501,COSM6716789	A	G	G	336484	0.912811	0.0405283	0.0243903	NA
Hypertension	noDM	UKB	MT-ND5	ND5	NADH dehydrogenase subunit 5	13105	rs2853501,COSM6716789	A	G	G	304769	0.921936	0.0420674	0.0533453	NA
Hypertension	DM	UKB	MT-ND5	ND5	NADH dehydrogenase subunit 5	13105	rs2853501,COSM6716789	A	G	G	31715	0.794524	0.149859	0.124818	NA
Hypertension	Overall	BiLEVE	MT-ND5	ND5	NADH dehydrogenase subunit 5	13617	rs2853503	T	C	C	40738	0.937289	0.0454279	0.153971	NA
Hypertension	noDM	BiLEVE	MT-ND5	ND5	NADH dehydrogenase subunit 5	13617	rs2853503	T	C	C	36168	0.939795	0.0472528	0.188824	NA
Hypertension	DM	BiLEVE	MT-ND5	ND5	NADH dehydrogenase subunit 5	13617	rs2853503	T	C	C	4570	0.927952	0.165758	0.65191	NA
Hypertension	Overall	UKB	MT-ND5	ND5	NADH dehydrogenase subunit 5	13617	rs2853503	T	C	C	336861	0.997077	0.0154056	0.84931	NA
Hypertension	noDM	UKB	MT-ND5	ND5	NADH dehydrogenase subunit 5	13617	rs2853503	T	C	C	305123	1.00141	0.015959	0.929522	NA
Hypertension	DM	UKB	MT-ND5	ND5	NADH dehydrogenase subunit 5	13617	rs2853503	T	C	C	31738	0.940526	0.0587426	0.296575	NA
Hypertension	Overall	BiLEVE	MT-ND5	ND5	NADH dehydrogenase subunit 5	13708	rs28359178	G	A	A	40638	0.997888	0.039609	0.957435	NA
Hypertension	noDM	BiLEVE	MT-ND5	ND5	NADH dehydrogenase subunit 5	13708	rs28359178	G	A	A	36080	1.00908	0.0411399	0.826082	NA
Hypertension	DM	BiLEVE	MT-ND5	ND5	NADH dehydrogenase subunit 5	13708	rs28359178	G	A	A	4558	0.884039	0.146192	0.399174	NA
Hypertension	Overall	UKB	MT-ND5	ND5	NADH dehydrogenase subunit 5	13708	rs28359178	G	A	A	335960	1.00001	0.0134044	0.999252	NA
Hypertension	noDM	UKB	MT-ND5	ND5	NADH dehydrogenase subunit 5	13708	rs28359178	G	A	A	304293	1.00243	0.0138809	0.861248	NA
Hypertension	DM	UKB	MT-ND5	ND5	NADH dehydrogenase subunit 5	13708	rs28359178	G	A	A	31667	0.965085	0.0514343	0.489594	NA
Hypertension	Overall	UKB	MT-ND5	ND5	NADH dehydrogenase subunit 5	13759	rs386420024	G	A	A	335856	1.02365	0.0351339	0.505786	NA
Hypertension	noDM	UKB	MT-ND5	ND5	NADH dehydrogenase subunit 5	13759	rs386420024	G	A	A	304198	1.0099	0.0361738	0.785342	NA
Hypertension	DM	UKB	MT-ND5	ND5	NADH dehydrogenase subunit 5	13759	rs386420024	G	A	A	31658	1.26332	0.149655	0.118319	NA
Hypertension	Overall	UKB	MT-ND5	ND5	NADH dehydrogenase subunit 5	13780	rs41358152	A	G	G	336950	0.97833	0.024751	0.37607	NA
Hypertension	noDM	UKB	MT-ND5	ND5	NADH dehydrogenase subunit 5	13780	rs41358152	A	G	G	305204	0.981022	0.0256328	0.45476	NA
Hypertension	DM	UKB	MT-ND5	ND5	NADH dehydrogenase subunit 5	13780	rs41358152	A	G	G	31746	0.941954	0.0948889	0.528566	NA
Hypertension	Overall	BiLEVE	MT-ND5	ND5	NADH dehydrogenase subunit 5	13879	rs879087566	T	C	C	40693	0.89002	0.107417	0.27807	NA
Hypertension	noDM	BiLEVE	MT-ND5	ND5	NADH dehydrogenase subunit 5	13879	rs879087566	T	C	C	36131	0.92539	0.112773	0.49172	NA
Hypertension	DM	BiLEVE	MT-ND5	ND5	NADH dehydrogenase subunit 5	13879	rs879087566	T	C	C	4562	0.621573	0.3458	0.169108	NA
Hypertension	Overall	UKB	MT-ND5	ND5	NADH dehydrogenase subunit 5	13879	rs879087566	T	C	C	336294	1.04299	0.0377772	0.265156	NA
Hypertension	noDM	UKB	MT-ND5	ND5	NADH dehydrogenase subunit 5	13879	rs879087566	T	C	C	304592	1.03712	0.0389642	0.349558	NA
Hypertension	DM	UKB	MT-ND5	ND5	NADH dehydrogenase subunit 5	13879	rs879087566	T	C	C	31702	1.12355	0.154757	0.451583	NA
Hypertension	Overall	BiLEVE	MT-ND5	ND5	NADH dehydrogenase subunit 5	13965	rs869156190	T	C	C	40672	1.27222	0.126919	0.0578277	NA
Hypertension	noDM	BiLEVE	MT-ND5	ND5	NADH dehydrogenase subunit 5	13965	rs869156190	T	C	C	36110	1.2986	0.133062	0.0495677	NA
Hypertension	DM	BiLEVE	MT-ND5	ND5	NADH dehydrogenase subunit 5	13965	rs869156190	T	C	C	4562	1.10996	0.418637	0.803199	NA
Hypertension	Overall	UKB	MT-ND5	ND5	NADH dehydrogenase subunit 5	13965	rs869156190	T	C	C	336549	1.01538	0.0408495	0.708724	NA
Hypertension	noDM	UKB	MT-ND5	ND5	NADH dehydrogenase subunit 5	13965	rs869156190	T	C	C	304837	1.01996	0.0422946	0.640252	NA
Hypertension	DM	UKB	MT-ND5	ND5	NADH dehydrogenase subunit 5	13965	rs869156190	T	C	C	31712	0.949926	0.156552	0.742804	NA
Hypertension	Overall	BiLEVE	MT-ND5	ND5	NADH dehydrogenase subunit 5	13966	rs41535848	A	G	G	40766	1.22574	0.105643	0.0540139	NA
Hypertension	noDM	BiLEVE	MT-ND5	ND5	NADH dehydrogenase subunit 5	13966	rs41535848	A	G	G	36194	1.19194	0.108109	0.10435	NA
Hypertension	DM	BiLEVE	MT-ND5	ND5	NADH dehydrogenase subunit 5	13966	rs41535848	A	G	G	4572	2.15959	0.528386	0.145085	NA
Hypertension	Overall	UKB	MT-ND5	ND5	NADH dehydrogenase subunit 5	13966	rs41535848	A	G	G	337001	0.946947	0.0328577	0.0971106	NA
Hypertension	noDM	UKB	MT-ND5	ND5	NADH dehydrogenase subunit 5	13966	rs41535848	A	G	G	305253	0.959803	0.0340172	0.227792	NA
Hypertension	DM	UKB	MT-ND5	ND5	NADH dehydrogenase subunit 5	13966	rs41535848	A	G	G	31748	0.776378	0.124975	0.0428333	NA
Hypertension	Overall	BiLEVE	MT-ND5	ND5	NADH dehydrogenase subunit 5	14133	rs879100848	A	G	G	40716	0.993579	0.131573	0.960949	NA
Hypertension	noDM	BiLEVE	MT-ND5	ND5	NADH dehydrogenase subunit 5	14133	rs879100848	A	G	G	36149	0.971605	0.137718	0.834317	NA
Hypertension	DM	BiLEVE	MT-ND5	ND5	NADH dehydrogenase subunit 5	14133	rs879100848	A	G	G	4567	1.31359	0.454872	0.548738	NA
Hypertension	Overall	BiLEVE	MT-ND6	ND6	NADH dehydrogenase subunit 6	14167	rs193302977	C	T	T	40769	1.0167	0.0480268	0.730253	NA
Hypertension	noDM	BiLEVE	MT-ND6	ND6	NADH dehydrogenase subunit 6	14167	rs193302977	C	T	T	36197	1.02183	0.0497293	0.664136	NA
Hypertension	DM	BiLEVE	MT-ND6	ND6	NADH dehydrogenase subunit 6	14167	rs193302977	C	T	T	4572	0.936495	0.184832	0.722606	NA
Hypertension	Overall	UKB	MT-ND6	ND6	NADH dehydrogenase subunit 6	14167	rs193302977	C	T	T	337119	0.98693	0.0158922	0.407753	NA
Hypertension	noDM	UKB	MT-ND6	ND6	NADH dehydrogenase subunit 6	14167	rs193302977	C	T	T	305351	0.984498	0.0164318	0.341715	NA
Hypertension	DM	UKB	MT-ND6	ND6	NADH dehydrogenase subunit 6	14167	rs193302977	C	T	T	31768	1.02133	0.0624952	0.735632	NA
Hypertension	Overall	BiLEVE	MT-ND6	ND6	NADH dehydrogenase subunit 6	14233	rs3915611,COSM1138250,COSM1138251	A	G	G	40759	1.12881	0.0503135	0.0160334	NA
Hypertension	noDM	BiLEVE	MT-ND6	ND6	NADH dehydrogenase subunit 6	14233	rs3915611,COSM1138250,COSM1138251	A	G	G	36188	1.13724	0.0522019	0.0137549	NA
Hypertension	DM	BiLEVE	MT-ND6	ND6	NADH dehydrogenase subunit 6	14233	rs3915611,COSM1138250,COSM1138251	A	G	G	4571	1.02782	0.187807	0.883839	NA
Hypertension	Overall	UKB	MT-ND6	ND6	NADH dehydrogenase subunit 6	14582	rs41354845	A	G	G	333241	1.01041	0.0331637	0.754748	NA
Hypertension	noDM	UKB	MT-ND6	ND6	NADH dehydrogenase subunit 6	14582	rs41354845	A	G	G	301887	1.00046	0.0341924	0.989322	NA
Hypertension	DM	UKB	MT-ND6	ND6	NADH dehydrogenase subunit 6	14582	rs41354845	A	G	G	31354	1.17424	0.137384	0.242343	NA
Hypertension	Overall	UKB	MT-ND6	ND6	NADH dehydrogenase subunit 6	14620	rs879141731,COSM6716820,COSM6716821	C	T	T	336948	1.05735	0.0316143	0.0777351	NA
Hypertension	noDM	UKB	MT-ND6	ND6	NADH dehydrogenase subunit 6	14620	rs879141731,COSM6716820,COSM6716821	C	T	T	305204	1.06287	0.032773	0.0628322	NA
Hypertension	DM	UKB	MT-ND6	ND6	NADH dehydrogenase subunit 6	14620	rs879141731,COSM6716820,COSM6716821	C	T	T	31744	0.991645	0.119481	0.944017	NA
Hypertension	Overall	BiLEVE	MT-CYB	Cytb	Cytochrome b	14766	rs193302980,rs527236041	T	C	C	40722	0.968144	0.0268041	0.227117	NA
Hypertension	noDM	BiLEVE	MT-CYB	Cytb	Cytochrome b	14766	rs193302980,rs527236041	T	C	C	36156	0.957476	0.0278089	0.118142	NA
Hypertension	DM	BiLEVE	MT-CYB	Cytb	Cytochrome b	14766	rs193302980,rs527236041	T	C	C	4566	1.10908	0.101022	0.305431	NA
Hypertension	Overall	BiLEVE	MT-CYB	Cytb	Cytochrome b	14793	rs2853504	A	G	G	40708	0.867533	0.0580899	0.0144359	NA
Hypertension	noDM	BiLEVE	MT-CYB	Cytb	Cytochrome b	14793	rs2853504	A	G	G	36147	0.870051	0.0605441	0.0214934	NA
Hypertension	DM	BiLEVE	MT-CYB	Cytb	Cytochrome b	14793	rs2853504	A	G	G	4561	0.870573	0.207517	0.504188	NA
Hypertension	Overall	BiLEVE	MT-CYB	Cytb	Cytochrome b	14798	rs28357681	T	C	C	40767	0.975191	0.0358972	0.484027	NA
Hypertension	noDM	BiLEVE	MT-CYB	Cytb	Cytochrome b	14798	rs28357681	T	C	C	36200	0.981636	0.0372062	0.618372	NA
Hypertension	DM	BiLEVE	MT-CYB	Cytb	Cytochrome b	14798	rs28357681	T	C	C	4567	0.891671	0.136418	0.400635	NA
Hypertension	Overall	UKB	MT-CYB	Cytb	Cytochrome b	14798	rs28357681	T	C	C	336988	0.983102	0.0120173	0.156142	NA
Hypertension	noDM	UKB	MT-CYB	Cytb	Cytochrome b	14798	rs28357681	T	C	C	305235	0.984027	0.0124395	0.195517	NA
Hypertension	DM	UKB	MT-CYB	Cytb	Cytochrome b	14798	rs28357681	T	C	C	31753	0.968662	0.0464005	0.492587	NA
Hypertension	Overall	UKB	MT-CYB	Cytb	Cytochrome b	14869	rs879218419	G	A	A	321602	1.03046	0.0440588	0.495911	NA
Hypertension	noDM	UKB	MT-CYB	Cytb	Cytochrome b	14869	rs879218419	G	A	A	291229	1.04858	0.0457727	0.300001	NA
Hypertension	DM	UKB	MT-CYB	Cytb	Cytochrome b	14869	rs879218419	G	A	A	30373	0.819746	0.160715	0.21619	NA
Hypertension	Overall	UKB	MT-CYB	Cytb	Cytochrome b	14872	rs878879194,COSM1133253,COSM1133254	C	T	T	337148	0.98478	0.0446317	0.73112	NA
Hypertension	noDM	UKB	MT-CYB	Cytb	Cytochrome b	14872	rs878879194,COSM1133253,COSM1133254	C	T	T	305383	0.995258	0.0462607	0.918168	NA
Hypertension	DM	UKB	MT-CYB	Cytb	Cytochrome b	14872	rs878879194,COSM1133253,COSM1133254	C	T	T	31765	0.85356	0.16803	0.346026	NA
Hypertension	Overall	BiLEVE	MT-CYB	Cytb	Cytochrome b	14905	rs193302983,rs527236203	G	A	A	40708	1.12038	0.0458051	0.0130802	NA
Hypertension	noDM	BiLEVE	MT-CYB	Cytb	Cytochrome b	14905	rs193302983,rs527236203	G	A	A	36146	1.13967	0.0476408	0.00606541	NA
Hypertension	DM	BiLEVE	MT-CYB	Cytb	Cytochrome b	14905	rs193302983,rs527236203	G	A	A	4562	0.884851	0.164929	0.458239	NA
Hypertension	Overall	UKB	MT-CYB	Cytb	Cytochrome b	14905	rs193302983,rs527236203	G	A	A	336784	1.01863	0.0149018	0.215583	NA
Hypertension	noDM	UKB	MT-CYB	Cytb	Cytochrome b	14905	rs193302983,rs527236203	G	A	A	305048	1.02864	0.0154463	0.0675492	NA
Hypertension	DM	UKB	MT-CYB	Cytb	Cytochrome b	14905	rs193302983,rs527236203	G	A	A	31736	0.891332	0.0562183	0.0407295	NA
Hypertension	Overall	BiLEVE	MT-CYB	Cytb	Cytochrome b	15043	rs193302985,rs527236043	G	A	A	40701	1.01136	0.0675199	0.867093	NA
Hypertension	noDM	BiLEVE	MT-CYB	Cytb	Cytochrome b	15043	rs193302985,rs527236043	G	A	A	36134	1.00666	0.0697449	0.924131	NA
Hypertension	DM	BiLEVE	MT-CYB	Cytb	Cytochrome b	15043	rs193302985,rs527236043	G	A	A	4567	1.09452	0.27294	0.740727	NA
Hypertension	Overall	UKB	MT-CYB	Cytb	Cytochrome b	15043	rs193302985,rs527236043	G	A	A	336604	0.98873	0.0223559	0.612173	NA
Hypertension	noDM	UKB	MT-CYB	Cytb	Cytochrome b	15043	rs193302985,rs527236043	G	A	A	304884	0.989758	0.023147	0.656504	NA
Hypertension	DM	UKB	MT-CYB	Cytb	Cytochrome b	15043	rs193302985,rs527236043	G	A	A	31720	0.974578	0.0860989	0.76488	NA
Hypertension	Overall	BiLEVE	MT-CYB	Cytb	Cytochrome b	15218	rs2853506	A	G	G	40698	0.83483	0.0651779	0.00560978	NA
Hypertension	noDM	BiLEVE	MT-CYB	Cytb	Cytochrome b	15218	rs2853506	A	G	G	36137	0.83821	0.0680327	0.00948271	NA
Hypertension	DM	BiLEVE	MT-CYB	Cytb	Cytochrome b	15218	rs2853506	A	G	G	4561	0.828326	0.228707	0.410204	NA
Hypertension	Overall	UKB	MT-CYB	Cytb	Cytochrome b	15218	rs2853506	A	G	G	336804	0.991041	0.0226711	0.691411	NA
Hypertension	noDM	UKB	MT-CYB	Cytb	Cytochrome b	15218	rs2853506	A	G	G	305068	1.00985	0.0235348	0.677182	NA
Hypertension	DM	UKB	MT-CYB	Cytb	Cytochrome b	15218	rs2853506	A	G	G	31736	0.769011	0.0834929	0.00165646	NA
Hypertension	Overall	BiLEVE	MT-CYB	Cytb	Cytochrome b	15257	rs41518645,COSM1138306,COSM1138307	G	A	A	40734	1.14249	0.0932896	0.153312	NA
Hypertension	noDM	BiLEVE	MT-CYB	Cytb	Cytochrome b	15257	rs41518645,COSM1138306,COSM1138307	G	A	A	36166	1.16632	0.0979502	0.116235	NA
Hypertension	DM	BiLEVE	MT-CYB	Cytb	Cytochrome b	15257	rs41518645,COSM1138306,COSM1138307	G	A	A	4568	0.960869	0.305477	0.896034	NA
Hypertension	Overall	UKB	MT-CYB	Cytb	Cytochrome b	15257	rs41518645,COSM1138306,COSM1138307	G	A	A	336966	1.02144	0.0308441	0.491644	NA
Hypertension	noDM	UKB	MT-CYB	Cytb	Cytochrome b	15257	rs41518645,COSM1138306,COSM1138307	G	A	A	305221	1.02399	0.0319089	0.457465	NA
Hypertension	DM	UKB	MT-CYB	Cytb	Cytochrome b	15257	rs41518645,COSM1138306,COSM1138307	G	A	A	31745	0.98631	0.119952	0.908513	NA
Hypertension	Overall	UKB	MT-CYB	Cytb	Cytochrome b	15301	rs193302991,rs527236045	G	A	A	336908	0.979819	0.0559018	0.71533	NA
Hypertension	noDM	UKB	MT-CYB	Cytb	Cytochrome b	15301	rs193302991,rs527236045	G	A	A	305156	0.987175	0.0580858	0.824142	NA
Hypertension	DM	UKB	MT-CYB	Cytb	Cytochrome b	15301	rs193302991,rs527236045	G	A	A	31752	0.892616	0.204524	0.578599	NA
Hypertension	Overall	BiLEVE	MT-CYB	Cytb	Cytochrome b	15452	rs193302994,rs527236209	C	A	A	40594	1.03383	0.0330223	0.31363	NA
Hypertension	noDM	BiLEVE	MT-CYB	Cytb	Cytochrome b	15452	rs193302994,rs527236209	C	A	A	36041	1.04975	0.0343198	0.157159	NA
Hypertension	DM	BiLEVE	MT-CYB	Cytb	Cytochrome b	15452	rs193302994,rs527236209	C	A	A	4553	0.856842	0.120887	0.201226	NA
Hypertension	Overall	UKB	MT-CYB	Cytb	Cytochrome b	15452	rs193302994,rs527236209	C	A	A	335897	1.00948	0.0110062	0.391188	NA
Hypertension	noDM	UKB	MT-CYB	Cytb	Cytochrome b	15452	rs193302994,rs527236209	C	A	A	304246	1.01635	0.0114013	0.15483	NA
Hypertension	DM	UKB	MT-CYB	Cytb	Cytochrome b	15452	rs193302994,rs527236209	C	A	A	31651	0.918003	0.0419916	0.0416072	NA
Hypertension	Overall	BiLEVE	MT-CYB	Cytb	Cytochrome b	15693	rs200975632,COSM6716259,COSM6716260	T	C	C	40778	1.03353	0.0938008	0.725178	NA
Hypertension	noDM	BiLEVE	MT-CYB	Cytb	Cytochrome b	15693	rs200975632,COSM6716259,COSM6716260	T	C	C	36208	1.08609	0.0982027	0.400382	NA
Hypertension	DM	BiLEVE	MT-CYB	Cytb	Cytochrome b	15693	rs200975632,COSM6716259,COSM6716260	T	C	C	4570	0.569028	0.308478	0.0675847	NA
Hypertension	Overall	UKB	MT-CYB	Cytb	Cytochrome b	15693	rs200975632,COSM6716259,COSM6716260	T	C	C	337206	1.05691	0.0318	0.0817614	NA
Hypertension	noDM	UKB	MT-CYB	Cytb	Cytochrome b	15693	rs200975632,COSM6716259,COSM6716260	T	C	C	305429	1.06399	0.0329735	0.0599662	NA
Hypertension	DM	UKB	MT-CYB	Cytb	Cytochrome b	15693	rs200975632,COSM6716259,COSM6716260	T	C	C	31777	0.971316	0.119679	0.807866	NA
Hypertension	Overall	BiLEVE	MT-CYB	Cytb	Cytochrome b	15758	rs527236193	A	G	G	40754	0.968532	0.0952717	0.737168	NA
Hypertension	noDM	BiLEVE	MT-CYB	Cytb	Cytochrome b	15758	rs527236193	A	G	G	36187	0.947833	0.0975692	0.582923	NA
Hypertension	DM	BiLEVE	MT-CYB	Cytb	Cytochrome b	15758	rs527236193	A	G	G	4567	1.52097	0.474998	0.377325	NA
Hypertension	Overall	UKB	MT-CYB	Cytb	Cytochrome b	15758	rs527236193	A	G	G	336998	1.03035	0.0328018	0.36206	NA
Hypertension	noDM	UKB	MT-CYB	Cytb	Cytochrome b	15758	rs527236193	A	G	G	305245	1.03515	0.0339485	0.308872	NA
Hypertension	DM	UKB	MT-CYB	Cytb	Cytochrome b	15758	rs527236193	A	G	G	31753	0.96823	0.126534	0.798605	NA
Hypertension	Overall	BiLEVE	MT-CYB	Cytb	Cytochrome b	15833	rs41504845	C	T	T	40747	0.876928	0.0939002	0.161926	NA
Hypertension	noDM	BiLEVE	MT-CYB	Cytb	Cytochrome b	15833	rs41504845	C	T	T	36181	0.935544	0.0986579	0.499462	NA
Hypertension	DM	BiLEVE	MT-CYB	Cytb	Cytochrome b	15833	rs41504845	C	T	T	4566	0.433912	0.297293	0.00497904	NA
Hypertension	Overall	UKB	MT-CYB	Cytb	Cytochrome b	15833	rs41504845	C	T	T	336911	1.08462	0.0326842	0.012944	NA
Hypertension	noDM	UKB	MT-CYB	Cytb	Cytochrome b	15833	rs41504845	C	T	T	305171	1.0771	0.0337436	0.027739	NA
Hypertension	DM	UKB	MT-CYB	Cytb	Cytochrome b	15833	rs41504845	C	T	T	31740	1.19845	0.132103	0.17058	NA
Hypertension	Overall	BiLEVE	MT-CYB	Cytb	Cytochrome b	15884	rs527236195	G	A	A	40690	0.988481	0.11633	0.920664	NA
Hypertension	noDM	BiLEVE	MT-CYB	Cytb	Cytochrome b	15884	rs527236195	G	A	A	36125	0.961801	0.120925	0.747389	NA
Hypertension	DM	BiLEVE	MT-CYB	Cytb	Cytochrome b	15884	rs527236195	G	A	A	4565	1.34022	0.442309	0.507939	NA
Hypertension	Overall	UKB	MT-CYB	Cytb	Cytochrome b	15884	rs527236195	G	A	A	336511	0.989766	0.0386136	0.789932	NA
Hypertension	noDM	UKB	MT-CYB	Cytb	Cytochrome b	15884	rs527236195	G	A	A	304798	0.990559	0.0398675	0.811939	NA
Hypertension	DM	UKB	MT-CYB	Cytb	Cytochrome b	15884	rs527236195	G	A	A	31713	0.979392	0.154549	0.892823	NA
Hypertension	Overall	UKB	MT-TT	T	tRNA threonine	15924	-	A	G	G	336083	0.967247	0.0187603	0.0758782	NA
Hypertension	noDM	UKB	MT-TT	T	tRNA threonine	15924	-	A	G	G	304415	0.97852	0.0194497	0.264247	NA
Hypertension	DM	UKB	MT-TT	T	tRNA threonine	15924	-	A	G	G	31668	0.825378	0.0705066	0.00649024	NA
Hypertension	Overall	BiLEVE	MT-TT	T	tRNA threonine	15928	rs527236198	G	A	A	40542	1.11697	0.0458687	0.0158806	NA
Hypertension	noDM	BiLEVE	MT-TT	T	tRNA threonine	15928	rs527236198	G	A	A	36003	1.13705	0.0477049	0.00709395	NA
Hypertension	DM	BiLEVE	MT-TT	T	tRNA threonine	15928	rs527236198	G	A	A	4539	0.871379	0.165087	0.404297	NA
Hypertension	Overall	UKB	MT-TT	T	tRNA threonine	15928	rs527236198	G	A	A	335371	1.01961	0.0149491	0.193853	NA
Hypertension	noDM	UKB	MT-TT	T	tRNA threonine	15928	rs527236198	G	A	A	303769	1.02999	0.0154977	0.056525	NA
Hypertension	DM	UKB	MT-TT	T	tRNA threonine	15928	rs527236198	G	A	A	31602	0.887775	0.0562716	0.0343963	NA
Hypertension	Overall	UKB	MT-HV1	CR:HVS1/HV1	Hypervariable segment 1 [classic:16024-16365]	16145	rs41419246	G	A	A	336743	1.0117	0.0248169	0.639297	NA
Hypertension	noDM	UKB	MT-HV1	CR:HVS1/HV1	Hypervariable segment 1 [classic:16024-16365]	16145	rs41419246	G	A	A	305009	1.01327	0.0256447	0.607328	NA
Hypertension	DM	UKB	MT-HV1	CR:HVS1/HV1	Hypervariable segment 1 [classic:16024-16365]	16145	rs41419246	G	A	A	31734	0.981007	0.0980356	0.844928	NA
Hypertension	Overall	BiLEVE	MT-TAS	CR:TAS	termination-associated sequence	16162	rs41466049	A	G	G	40691	0.866765	0.0838501	0.0881429	NA
Hypertension	noDM	BiLEVE	MT-TAS	CR:TAS	termination-associated sequence	16162	rs41466049	A	G	G	36126	0.885884	0.0874577	0.165913	NA
Hypertension	DM	BiLEVE	MT-TAS	CR:TAS	termination-associated sequence	16162	rs41466049	A	G	G	4565	0.642347	0.290803	0.127988	NA
Hypertension	Overall	BiLEVE	MT-TAS	CR:TAS	termination-associated sequence	16172	rs2853817	T	C	C	40659	0.956858	0.0682948	0.518447	NA
Hypertension	noDM	BiLEVE	MT-TAS	CR:TAS	termination-associated sequence	16172	rs2853817	T	C	C	36091	0.975943	0.0711908	0.732309	NA
Hypertension	DM	BiLEVE	MT-TAS	CR:TAS	termination-associated sequence	16172	rs2853817	T	C	C	4568	0.760623	0.240237	0.254724	NA
Hypertension	Overall	BiLEVE	MT-HV1	CR:HVS1/HV1	Hypervariable segment 1 [classic:16024-16365]	16193	rs879091650	C	T	T	40614	1.05489	0.1115	0.631749	NA
Hypertension	noDM	BiLEVE	MT-HV1	CR:HVS1/HV1	Hypervariable segment 1 [classic:16024-16365]	16193	rs879091650	C	T	T	36063	1.08779	0.115917	0.467882	NA
Hypertension	DM	BiLEVE	MT-HV1	CR:HVS1/HV1	Hypervariable segment 1 [classic:16024-16365]	16193	rs879091650	C	T	T	4551	0.702633	0.395874	0.372663	NA
Hypertension	Overall	UKB	MT-HV1	CR:HVS1/HV1	Hypervariable segment 1 [classic:16024-16365]	16193	rs879091650	C	T	T	336129	1.08942	0.0401314	0.0328274	NA
Hypertension	noDM	UKB	MT-HV1	CR:HVS1/HV1	Hypervariable segment 1 [classic:16024-16365]	16193	rs879091650	C	T	T	304464	1.09497	0.0415163	0.0288618	NA
Hypertension	DM	UKB	MT-HV1	CR:HVS1/HV1	Hypervariable segment 1 [classic:16024-16365]	16193	rs879091650	C	T	T	31665	1.00328	0.155666	0.983219	NA
Hypertension	Overall	BiLEVE	MT-HV1	CR:HVS1/HV1	Hypervariable segment 1 [classic:16024-16365]	16223	rs2853513	C	T	T	40678	1.02436	0.0519658	0.643303	NA
Hypertension	noDM	BiLEVE	MT-HV1	CR:HVS1/HV1	Hypervariable segment 1 [classic:16024-16365]	16223	rs2853513	C	T	T	36122	1.00941	0.0536549	0.861468	NA
Hypertension	DM	BiLEVE	MT-HV1	CR:HVS1/HV1	Hypervariable segment 1 [classic:16024-16365]	16223	rs2853513	C	T	T	4556	1.28249	0.213218	0.243253	NA
Hypertension	Overall	UKB	MT-HV1	CR:HVS1/HV1	Hypervariable segment 1 [classic:16024-16365]	16270	rs2857290	C	T	T	336192	0.991754	0.0156855	0.597577	NA
Hypertension	noDM	UKB	MT-HV1	CR:HVS1/HV1	Hypervariable segment 1 [classic:16024-16365]	16270	rs2857290	C	T	T	304506	0.995469	0.0162458	0.779846	NA
Hypertension	DM	UKB	MT-HV1	CR:HVS1/HV1	Hypervariable segment 1 [classic:16024-16365]	16270	rs2857290	C	T	T	31686	0.943657	0.0599979	0.333753	NA
Hypertension	Overall	BiLEVE	MT-HV1	CR:HVS1/HV1	Hypervariable segment 1 [classic:16024-16365]	16298	rs148377232	T	C	C	40714	0.945306	0.0660223	0.394251	NA
Hypertension	noDM	BiLEVE	MT-HV1	CR:HVS1/HV1	Hypervariable segment 1 [classic:16024-16365]	16298	rs148377232	T	C	C	36152	0.919413	0.0682433	0.218255	NA
Hypertension	DM	BiLEVE	MT-HV1	CR:HVS1/HV1	Hypervariable segment 1 [classic:16024-16365]	16298	rs148377232	T	C	C	4562	1.34995	0.272142	0.270199	NA
Hypertension	Overall	BiLEVE	MT-HV1	CR:HVS1/HV1	Hypervariable segment 1 [classic:16024-16365]	16356	rs62581340	T	C	C	40562	1.10711	0.069586	0.143656	NA
Hypertension	noDM	BiLEVE	MT-HV1	CR:HVS1/HV1	Hypervariable segment 1 [classic:16024-16365]	16356	rs62581340	T	C	C	36008	1.11212	0.0722817	0.141524	NA
Hypertension	DM	BiLEVE	MT-HV1	CR:HVS1/HV1	Hypervariable segment 1 [classic:16024-16365]	16356	rs62581340	T	C	C	4554	1.04348	0.256591	0.868246	NA
Hypertension	Overall	UKB	MT-HV1	CR:HVS1/HV1	Hypervariable segment 1 [classic:16024-16365]	16356	rs62581340	T	C	C	335493	1.04371	0.0229443	0.0622198	NA
Hypertension	noDM	UKB	MT-HV1	CR:HVS1/HV1	Hypervariable segment 1 [classic:16024-16365]	16356	rs62581340	T	C	C	303912	1.04347	0.0237145	0.0727666	NA
Hypertension	DM	UKB	MT-HV1	CR:HVS1/HV1	Hypervariable segment 1 [classic:16024-16365]	16356	rs62581340	T	C	C	31581	1.0469	0.090611	0.612991	NA
Hypertension	Overall	BiLEVE	MT-HV1	CR:HVS1/HV1	Hypervariable segment 1 [classic:16024-16365]	16362	rs62581341	T	C	C	40658	1.05048	0.0490423	0.315252	NA
Hypertension	noDM	BiLEVE	MT-HV1	CR:HVS1/HV1	Hypervariable segment 1 [classic:16024-16365]	16362	rs62581341	T	C	C	36097	1.0195	0.050814	0.703868	NA
Hypertension	DM	BiLEVE	MT-HV1	CR:HVS1/HV1	Hypervariable segment 1 [classic:16024-16365]	16362	rs62581341	T	C	C	4561	1.55598	0.194528	0.023044	NA
Hypertension	Overall	UKB	MT-HV1	CR:HVS1/HV1	Hypervariable segment 1 [classic:16024-16365]	16362	rs62581341	T	C	C	336286	0.994065	0.016206	0.71339	NA
Hypertension	noDM	UKB	MT-HV1	CR:HVS1/HV1	Hypervariable segment 1 [classic:16024-16365]	16362	rs62581341	T	C	C	304604	0.986556	0.0167389	0.41875	NA
Hypertension	DM	UKB	MT-HV1	CR:HVS1/HV1	Hypervariable segment 1 [classic:16024-16365]	16362	rs62581341	T	C	C	31682	1.1075	0.0650575	0.116533	NA
Hypertension	Overall	UKB	NA	CR:HVS2	Hypervariable segment 2 [classic:73-340 ]	16391	rs869031877	G	A	A	336083	0.982873	0.0249038	0.487868	NA
Hypertension	noDM	UKB	NA	CR:HVS2	Hypervariable segment 2 [classic:73-340 ]	16391	rs869031877	G	A	A	304400	0.985762	0.0257905	0.578201	NA
Hypertension	DM	UKB	NA	CR:HVS2	Hypervariable segment 2 [classic:73-340 ]	16391	rs869031877	G	A	A	31683	0.944405	0.0954799	0.549118	NA

## Sheet: Chol
PHENO	COHORT	ARRAY	GENE	REGION	DESCRIPTION	BP	RS	REF	ALT	A1	OBS_CT	OR.or.BETA	SE.or.LOG(OR)_SE	P	SP2
Chol	Overall	BiLEVE	MT-HV2	CR:HVS2	Hypervariable segment 2 [classic:73-340 ]	73	rs869183622	G	A	A	38893	0.00951924	0.00976386	0.329593	NA
Chol	noDM	BiLEVE	MT-HV2	CR:HVS2	Hypervariable segment 2 [classic:73-340 ]	73	rs869183622	G	A	A	34556	0.00715102	0.010643	0.501652	NA
Chol	DM	BiLEVE	MT-HV2	CR:HVS2	Hypervariable segment 2 [classic:73-340 ]	73	rs869183622	G	A	A	4337	0.0218555	0.0292185	0.4545	NA
Chol	Overall	UKB	MT-HV2	CR:HVS2	Hypervariable segment 2 [classic:73-340 ]	73	rs869183622	G	A	A	321470	0.00378892	0.00342272	0.268298	NA
Chol	noDM	UKB	MT-HV2	CR:HVS2	Hypervariable segment 2 [classic:73-340 ]	73	rs869183622	G	A	A	291813	0.00326679	0.0036544	0.371358	NA
Chol	DM	UKB	MT-HV2	CR:HVS2	Hypervariable segment 2 [classic:73-340 ]	73	rs869183622	G	A	A	29657	0.00812561	0.0111864	0.46761	NA
Chol	Overall	BiLEVE	MT-OHR	CR:OH	H-strand origins	150	rs62581312	C	T	T	38872	-0.0075658	0.0166962	0.650446	NA
Chol	noDM	BiLEVE	MT-OHR	CR:OH	H-strand origins	150	rs62581312	C	T	T	34538	-0.0243782	0.0181869	0.180116	NA
Chol	DM	BiLEVE	MT-OHR	CR:OH	H-strand origins	150	rs62581312	C	T	T	4334	0.113462	0.0502167	0.0239058	NA
Chol	Overall	UKB	MT-OHR	CR:OH	H-strand origins	150	rs62581312	C	T	T	321302	0.00488408	0.00588854	0.406867	NA
Chol	noDM	UKB	MT-OHR	CR:OH	H-strand origins	150	rs62581312	C	T	T	291640	0.005218	0.00628564	0.406457	NA
Chol	DM	UKB	MT-OHR	CR:OH	H-strand origins	150	rs62581312	C	T	T	29662	0.0029187	0.0192929	0.879753	NA
Chol	Overall	BiLEVE	MT-OHR	CR:OH	H-strand origins	228	rs41323649	G	A	A	38848	-0.0440326	0.0195959	0.024644	NA
Chol	noDM	BiLEVE	MT-OHR	CR:OH	H-strand origins	228	rs41323649	G	A	A	34515	-0.0297975	0.0212898	0.161638	NA
Chol	DM	BiLEVE	MT-OHR	CR:OH	H-strand origins	228	rs41323649	G	A	A	4333	-0.13061	0.060305	0.0303785	NA
Chol	Overall	UKB	MT-OHR	CR:OH	H-strand origins	228	rs41323649	G	A	A	321081	-0.020386	0.00692705	0.00325114	NA
Chol	noDM	UKB	MT-OHR	CR:OH	H-strand origins	228	rs41323649	G	A	A	291437	-0.020789	0.00740327	0.00498411	NA
Chol	DM	UKB	MT-OHR	CR:OH	H-strand origins	228	rs41323649	G	A	A	29644	-0.024167	0.0224173	0.28102	NA
Chol	Overall	BiLEVE	MT-TFX	CR:TFX	mtTF1 binding site	239	rs879149197	T	C	C	38865	0.0106361	0.0290443	0.714216	NA
Chol	noDM	BiLEVE	MT-TFX	CR:TFX	mtTF1 binding site	239	rs879149197	T	C	C	34528	0.00152281	0.0315958	0.96156	NA
Chol	DM	BiLEVE	MT-TFX	CR:TFX	mtTF1 binding site	239	rs879149197	T	C	C	4337	0.0512758	0.0883691	0.561779	NA
Chol	Overall	BiLEVE	MT-OHR	CR:OH	H-strand origins	263	rs2853515	G	A	A	38923	0.099947	0.0463889	0.0312034	NA
Chol	noDM	BiLEVE	MT-OHR	CR:OH	H-strand origins	263	rs2853515	G	A	A	34586	0.0996965	0.0502312	0.04718	NA
Chol	DM	BiLEVE	MT-OHR	CR:OH	H-strand origins	263	rs2853515	G	A	A	4337	0.155449	0.146815	0.289747	NA
Chol	Overall	UKB	MT-TFY	CR:TFY	mtTF1 binding site	295	rs41528348	C	T	T	319435	-0.0167354	0.0054921	0.00231016	NA
Chol	noDM	UKB	MT-TFY	CR:TFY	mtTF1 binding site	295	rs41528348	C	T	T	289932	-0.0155348	0.00586794	0.00811162	NA
Chol	DM	UKB	MT-TFY	CR:TFY	mtTF1 binding site	295	rs41528348	C	T	T	29503	-0.0271329	0.0178272	0.12802	NA
Chol	Overall	BiLEVE	MT-HV3	CR:HVS3	Hypervariable segment 3	456	rs41356551	C	T	T	38819	-0.0110283	0.0249557	0.658553	NA
Chol	noDM	BiLEVE	MT-HV3	CR:HVS3	Hypervariable segment 3	456	rs41356551	C	T	T	34490	-0.0227182	0.0272282	0.404082	NA
Chol	DM	BiLEVE	MT-HV3	CR:HVS3	Hypervariable segment 3	456	rs41356551	C	T	T	4329	0.0592126	0.0741849	0.424812	NA
Chol	Overall	BiLEVE	MT-HV3	CR:HVS3	Hypervariable segment 3	497	rs28660704	C	T	T	38934	0.0464819	0.0227803	0.0413128	NA
Chol	noDM	BiLEVE	MT-HV3	CR:HVS3	Hypervariable segment 3	497	rs28660704	C	T	T	34591	0.0392261	0.02476	0.113145	NA
Chol	DM	BiLEVE	MT-HV3	CR:HVS3	Hypervariable segment 3	497	rs28660704	C	T	T	4343	0.0900233	0.0698669	0.197642	NA
Chol	Overall	UKB	MT-HV3	CR:HVS3	Hypervariable segment 3	497	rs28660704	C	T	T	321751	-0.00599064	0.00799889	0.453898	NA
Chol	noDM	UKB	MT-HV3	CR:HVS3	Hypervariable segment 3	497	rs28660704	C	T	T	292058	-0.00181107	0.00853168	0.831892	NA
Chol	DM	UKB	MT-HV3	CR:HVS3	Hypervariable segment 3	497	rs28660704	C	T	T	29693	-0.0440494	0.0264062	0.0952972	NA
Chol	Overall	BiLEVE	MT-RNR1	12S	12S ribosomal RNA	709	rs2853517	G	A	A	38786	0.0107551	0.013691	0.432127	NA
Chol	noDM	BiLEVE	MT-RNR1	12S	12S ribosomal RNA	709	rs2853517	G	A	A	34464	0.012408	0.0149358	0.406115	NA
Chol	DM	BiLEVE	MT-RNR1	12S	12S ribosomal RNA	709	rs2853517	G	A	A	4322	-0.000917783	0.0407422	0.982029	NA
Chol	Overall	UKB	MT-RNR1	12S	12S ribosomal RNA	709	rs2853517	G	A	A	320240	-0.00283981	0.00482519	0.556171	NA
Chol	noDM	UKB	MT-RNR1	12S	12S ribosomal RNA	709	rs2853517	G	A	A	290678	-0.00252061	0.00515231	0.624686	NA
Chol	DM	UKB	MT-RNR1	12S	12S ribosomal RNA	709	rs2853517	G	A	A	29562	-0.00632176	0.0157528	0.688194	NA
Chol	Overall	UKB	MT-RNR1	12S	12S ribosomal RNA	750	rs2853518	G	A	A	314988	-0.00769684	0.0132779	0.562134	NA
Chol	noDM	UKB	MT-RNR1	12S	12S ribosomal RNA	750	rs2853518	G	A	A	286030	-0.00482843	0.0141671	0.733239	NA
Chol	DM	UKB	MT-RNR1	12S	12S ribosomal RNA	750	rs2853518	G	A	A	28958	-0.0425258	0.0437108	0.330616	NA
Chol	Overall	BiLEVE	MT-RNR1	12S	12S ribosomal RNA	1243	rs28358572	T	C	C	38955	0.0106869	0.0358026	0.765327	NA
Chol	noDM	BiLEVE	MT-RNR1	12S	12S ribosomal RNA	1243	rs28358572	T	C	C	34610	0.0119058	0.0394341	0.762717	NA
Chol	DM	BiLEVE	MT-RNR1	12S	12S ribosomal RNA	1243	rs28358572	T	C	C	4345	-0.013292	0.0992876	0.893508	NA
Chol	Overall	UKB	MT-RNR1	12S	12S ribosomal RNA	1243	rs28358572	T	C	C	321984	-0.0158704	0.0122937	0.196729	NA
Chol	noDM	UKB	MT-RNR1	12S	12S ribosomal RNA	1243	rs28358572	T	C	C	292270	-0.00571312	0.0131179	0.663184	NA
Chol	DM	UKB	MT-RNR1	12S	12S ribosomal RNA	1243	rs28358572	T	C	C	29714	-0.112153	0.0404187	0.00552724	NA
Chol	Overall	BiLEVE	MT-RNR1	12S	12S ribosomal RNA	1438	rs2001030	G	A	A	38889	0.0563375	0.0292745	0.0543047	NA
Chol	noDM	BiLEVE	MT-RNR1	12S	12S ribosomal RNA	1438	rs2001030	G	A	A	34549	0.0522505	0.0320049	0.102567	NA
Chol	DM	BiLEVE	MT-RNR1	12S	12S ribosomal RNA	1438	rs2001030	G	A	A	4340	0.121413	0.0856273	0.156284	NA
Chol	Overall	UKB	MT-RNR1	12S	12S ribosomal RNA	1438	rs2001030	G	A	A	321377	-0.0117853	0.0103156	0.253257	NA
Chol	noDM	UKB	MT-RNR1	12S	12S ribosomal RNA	1438	rs2001030	G	A	A	291713	-0.00937578	0.0110461	0.395999	NA
Chol	DM	UKB	MT-RNR1	12S	12S ribosomal RNA	1438	rs2001030	G	A	A	29664	-0.0383546	0.0327839	0.242042	NA
Chol	Overall	BiLEVE	MT-RNR2	16S	16S ribosomal RNA	1719	rs3928305	G	A	A	38872	-0.0354711	0.0176849	0.0448922	NA
Chol	noDM	BiLEVE	MT-RNR2	16S	16S ribosomal RNA	1719	rs3928305	G	A	A	34534	-0.0308945	0.0192247	0.108059	NA
Chol	DM	BiLEVE	MT-RNR2	16S	16S ribosomal RNA	1719	rs3928305	G	A	A	4338	-0.075028	0.0541099	0.165639	NA
Chol	Overall	UKB	MT-RNR2	16S	16S ribosomal RNA	1719	rs3928305	G	A	A	321391	0.00621222	0.00618631	0.315289	NA
Chol	noDM	UKB	MT-RNR2	16S	16S ribosomal RNA	1719	rs3928305	G	A	A	291726	0.00450036	0.00660106	0.495389	NA
Chol	DM	UKB	MT-RNR2	16S	16S ribosomal RNA	1719	rs3928305	G	A	A	29665	0.0227422	0.0203367	0.263453	NA
Chol	Overall	BiLEVE	MT-RNR2	16S	16S ribosomal RNA	1721	rs200626438	C	T	T	38949	-0.0526387	0.0302466	0.0818111	NA
Chol	noDM	BiLEVE	MT-RNR2	16S	16S ribosomal RNA	1721	rs200626438	C	T	T	34604	-0.0683625	0.0328995	0.037724	NA
Chol	DM	BiLEVE	MT-RNR2	16S	16S ribosomal RNA	1721	rs200626438	C	T	T	4345	0.0397652	0.0920942	0.665917	NA
Chol	Overall	UKB	MT-RNR2	16S	16S ribosomal RNA	1721	rs200626438	C	T	T	321889	0.00733661	0.0106016	0.48892	NA
Chol	noDM	UKB	MT-RNR2	16S	16S ribosomal RNA	1721	rs200626438	C	T	T	292174	0.00707775	0.0113143	0.531607	NA
Chol	DM	UKB	MT-RNR2	16S	16S ribosomal RNA	1721	rs200626438	C	T	T	29715	0.00402325	0.0347936	0.907945	NA
Chol	Overall	BiLEVE	MT-RNR2	16S	16S ribosomal RNA	1811	rs28358576	A	G	G	38917	0.0295913	0.0144664	0.0408107	NA
Chol	noDM	BiLEVE	MT-RNR2	16S	16S ribosomal RNA	1811	rs28358576	A	G	G	34576	0.0245965	0.0157235	0.117753	NA
Chol	DM	BiLEVE	MT-RNR2	16S	16S ribosomal RNA	1811	rs28358576	A	G	G	4341	0.0763204	0.0443313	0.0852148	NA
Chol	Overall	UKB	MT-RNR2	16S	16S ribosomal RNA	2158	rs41349444	T	C	C	321984	-0.0253467	0.0144617	0.0796576	NA
Chol	noDM	UKB	MT-RNR2	16S	16S ribosomal RNA	2158	rs41349444	T	C	C	292266	-0.0253328	0.0154505	0.101087	NA
Chol	DM	UKB	MT-RNR2	16S	16S ribosomal RNA	2158	rs41349444	T	C	C	29718	-0.0140461	0.0469783	0.764949	NA
Chol	Overall	BiLEVE	MT-RNR2	16S	16S ribosomal RNA	2706	rs2854128	G	A	A	38915	0.0117487	0.00978099	0.229688	NA
Chol	noDM	BiLEVE	MT-RNR2	16S	16S ribosomal RNA	2706	rs2854128	G	A	A	34570	0.00863952	0.0106627	0.417798	NA
Chol	DM	BiLEVE	MT-RNR2	16S	16S ribosomal RNA	2706	rs2854128	G	A	A	4345	0.0283933	0.0292848	0.332322	NA
Chol	Overall	UKB	MT-RNR2	16S	16S ribosomal RNA	2706	rs2854128	G	A	A	321572	0.00398847	0.00343051	0.244974	NA
Chol	noDM	UKB	MT-RNR2	16S	16S ribosomal RNA	2706	rs2854128	G	A	A	291889	0.00287905	0.00366263	0.431833	NA
Chol	DM	UKB	MT-RNR2	16S	16S ribosomal RNA	2706	rs2854128	G	A	A	29683	0.0128349	0.0112153	0.252463	NA
Chol	Overall	BiLEVE	MT-RNR2	16S	16S ribosomal RNA	3010	rs3928306	G	A	A	38895	-0.00117972	0.0110506	0.914983	NA
Chol	noDM	BiLEVE	MT-RNR2	16S	16S ribosomal RNA	3010	rs3928306	G	A	A	34558	0.00551444	0.0120411	0.64698	NA
Chol	DM	BiLEVE	MT-RNR2	16S	16S ribosomal RNA	3010	rs3928306	G	A	A	4337	-0.0386462	0.0331457	0.243699	NA
Chol	Overall	UKB	MT-RNR2	16S	16S ribosomal RNA	3010	rs3928306	G	A	A	321298	-0.00521961	0.0038824	0.178811	NA
Chol	noDM	UKB	MT-RNR2	16S	16S ribosomal RNA	3010	rs3928306	G	A	A	291648	-0.00511616	0.00414538	0.217135	NA
Chol	DM	UKB	MT-RNR2	16S	16S ribosomal RNA	3010	rs3928306	G	A	A	29650	-0.00528588	0.0126828	0.676846	NA
Chol	Overall	BiLEVE	MT-RNR2	16S	16S ribosomal RNA	3197	rs2854131	T	C	C	38845	-0.0278417	0.0168226	0.0979301	NA
Chol	noDM	BiLEVE	MT-RNR2	16S	16S ribosomal RNA	3197	rs2854131	T	C	C	34512	-0.0320915	0.0183529	0.080373	NA
Chol	DM	BiLEVE	MT-RNR2	16S	16S ribosomal RNA	3197	rs2854131	T	C	C	4333	-0.00414797	0.0499888	0.933873	NA
Chol	Overall	UKB	MT-RNR2	16S	16S ribosomal RNA	3197	rs2854131	T	C	C	321295	0.0141683	0.00591283	0.0165667	NA
Chol	noDM	UKB	MT-RNR2	16S	16S ribosomal RNA	3197	rs2854131	T	C	C	291643	0.0115596	0.00631298	0.0670888	NA
Chol	DM	UKB	MT-RNR2	16S	16S ribosomal RNA	3197	rs2854131	T	C	C	29652	0.0372608	0.0193274	0.0538805	NA
Chol	Overall	UKB	MT-ND1	ND1	NADH Dehydrogenase subunit 1	3394	rs41460449	T	C	C	321406	-0.0215178	0.0142094	0.129941	NA
Chol	noDM	UKB	MT-ND1	ND1	NADH Dehydrogenase subunit 1	3394	rs41460449	T	C	C	291736	-0.0182321	0.0151801	0.229731	NA
Chol	DM	UKB	MT-ND1	ND1	NADH Dehydrogenase subunit 1	3394	rs41460449	T	C	C	29670	-0.0641186	0.0461686	0.164907	NA
Chol	Overall	BiLEVE	MT-ND1	ND1	NADH Dehydrogenase subunit 1	3480	rs28358584	A	G	G	38925	0.0397094	0.01734	0.0220239	NA
Chol	noDM	BiLEVE	MT-ND1	ND1	NADH Dehydrogenase subunit 1	3480	rs28358584	A	G	G	34582	0.0339449	0.0188134	0.071193	NA
Chol	DM	BiLEVE	MT-ND1	ND1	NADH Dehydrogenase subunit 1	3480	rs28358584	A	G	G	4343	0.087655	0.0540062	0.104651	NA
Chol	Overall	UKB	MT-ND1	ND1	NADH Dehydrogenase subunit 1	3480	rs28358584	A	G	G	321723	-0.00773749	0.00607282	0.202622	NA
Chol	noDM	UKB	MT-ND1	ND1	NADH Dehydrogenase subunit 1	3480	rs28358584	A	G	G	292032	-0.00676185	0.00648116	0.296806	NA
Chol	DM	UKB	MT-ND1	ND1	NADH Dehydrogenase subunit 1	3480	rs28358584	A	G	G	29691	-0.0179032	0.0199261	0.368937	NA
Chol	Overall	UKB	MT-ND1	ND1	NADH Dehydrogenase subunit 1	3720	rs41355750	A	G	G	321417	-0.00162492	0.015706	0.917599	NA
Chol	noDM	UKB	MT-ND1	ND1	NADH Dehydrogenase subunit 1	3720	rs41355750	A	G	G	291761	0.00194933	0.016795	0.9076	NA
Chol	DM	UKB	MT-ND1	ND1	NADH Dehydrogenase subunit 1	3720	rs41355750	A	G	G	29656	-0.0436536	0.0505605	0.387928	NA
Chol	Overall	BiLEVE	MT-ND1	ND1	NADH Dehydrogenase subunit 1	3796	rs28357970	A	G	G	38914	-0.00486513	0.0383092	0.898944	NA
Chol	noDM	BiLEVE	MT-ND1	ND1	NADH Dehydrogenase subunit 1	3796	rs28357970	A	G	G	34571	-0.0193279	0.0419781	0.645212	NA
Chol	DM	BiLEVE	MT-ND1	ND1	NADH Dehydrogenase subunit 1	3796	rs28357970	A	G	G	4343	0.0628335	0.110232	0.568699	NA
Chol	Overall	UKB	MT-ND1	ND1	NADH Dehydrogenase subunit 1	3796	rs28357970	A	G	G	321689	0.0079311	0.0136198	0.56035	NA
Chol	noDM	UKB	MT-ND1	ND1	NADH Dehydrogenase subunit 1	3796	rs28357970	A	G	G	291996	0.0128329	0.0145236	0.376918	NA
Chol	DM	UKB	MT-ND1	ND1	NADH Dehydrogenase subunit 1	3796	rs28357970	A	G	G	29693	-0.0272432	0.0450588	0.54544	NA
Chol	Overall	UKB	MT-ND1	ND1	NADH Dehydrogenase subunit 1	3915	rs41524046,COSM1138362,COSM1138363	G	A	A	321638	0.00241265	0.0105883	0.819756	NA
Chol	noDM	UKB	MT-ND1	ND1	NADH Dehydrogenase subunit 1	3915	rs41524046,COSM1138362,COSM1138363	G	A	A	291943	-3.92217e-05	0.011307	0.997232	NA
Chol	DM	UKB	MT-ND1	ND1	NADH Dehydrogenase subunit 1	3915	rs41524046,COSM1138362,COSM1138363	G	A	A	29695	0.0330386	0.0345457	0.33889	NA
Chol	Overall	BiLEVE	MT-ND1	ND1	NADH Dehydrogenase subunit 1	3992	rs879051705	C	T	T	38932	0.0140594	0.0320592	0.660993	NA
Chol	noDM	BiLEVE	MT-ND1	ND1	NADH Dehydrogenase subunit 1	3992	rs879051705	C	T	T	34588	0.0126689	0.0345527	0.713878	NA
Chol	DM	BiLEVE	MT-ND1	ND1	NADH Dehydrogenase subunit 1	3992	rs879051705	C	T	T	4344	0.0277081	0.106128	0.794041	NA
Chol	Overall	UKB	MT-ND1	ND1	NADH Dehydrogenase subunit 1	3992	rs879051705	C	T	T	321701	0.00930536	0.0113592	0.412679	NA
Chol	noDM	UKB	MT-ND1	ND1	NADH Dehydrogenase subunit 1	3992	rs879051705	C	T	T	292001	0.0113205	0.012119	0.350244	NA
Chol	DM	UKB	MT-ND1	ND1	NADH Dehydrogenase subunit 1	3992	rs879051705	C	T	T	29700	-0.00092878	0.0374005	0.980188	NA
Chol	Overall	BiLEVE	MT-ND1	ND1	NADH Dehydrogenase subunit 1	4024	-	A	G	G	38922	0.00977414	0.0347695	0.778626	NA
Chol	noDM	BiLEVE	MT-ND1	ND1	NADH Dehydrogenase subunit 1	4024	-	A	G	G	34582	0.0185721	0.0375656	0.621034	NA
Chol	DM	BiLEVE	MT-ND1	ND1	NADH Dehydrogenase subunit 1	4024	-	A	G	G	4340	-0.0690478	0.112396	0.539031	NA
Chol	Overall	UKB	MT-ND1	ND1	NADH Dehydrogenase subunit 1	4024	-	A	G	G	321782	0.00411235	0.0123428	0.738999	NA
Chol	noDM	UKB	MT-ND1	ND1	NADH Dehydrogenase subunit 1	4024	-	A	G	G	292086	0.00347716	0.0131673	0.791722	NA
Chol	DM	UKB	MT-ND1	ND1	NADH Dehydrogenase subunit 1	4024	-	A	G	G	29696	0.0167975	0.0406709	0.679601	NA
Chol	Overall	BiLEVE	MT-ND1	ND1	NADH Dehydrogenase subunit 1	4216	COSM1138370,COSM1138371	T	C	C	38877	-0.013592	0.0118137	0.249933	NA
Chol	noDM	BiLEVE	MT-ND1	ND1	NADH Dehydrogenase subunit 1	4216	COSM1138370,COSM1138371	T	C	C	34541	-0.00979871	0.0128822	0.446878	NA
Chol	DM	BiLEVE	MT-ND1	ND1	NADH Dehydrogenase subunit 1	4216	COSM1138370,COSM1138371	T	C	C	4336	-0.0367334	0.0353058	0.298197	NA
Chol	Overall	UKB	MT-ND1	ND1	NADH Dehydrogenase subunit 1	4216	COSM1138370,COSM1138371	T	C	C	321526	-0.0119773	0.00416512	0.00403256	NA
Chol	noDM	UKB	MT-ND1	ND1	NADH Dehydrogenase subunit 1	4216	COSM1138370,COSM1138371	T	C	C	291851	-0.0115088	0.00444743	0.00966091	NA
Chol	DM	UKB	MT-ND1	ND1	NADH Dehydrogenase subunit 1	4216	COSM1138370,COSM1138371	T	C	C	29675	-0.0169955	0.0136026	0.211517	NA
Chol	Overall	BiLEVE	MT-TQ	Q	tRNA glutamine	4336	rs41456348	T	C	C	38879	0.039876	0.0320202	0.213015	NA
Chol	noDM	BiLEVE	MT-TQ	Q	tRNA glutamine	4336	rs41456348	T	C	C	34535	0.0126123	0.0348152	0.717157	NA
Chol	DM	BiLEVE	MT-TQ	Q	tRNA glutamine	4336	rs41456348	T	C	C	4344	0.259688	0.097837	0.00797657	NA
Chol	Overall	UKB	MT-TQ	Q	tRNA glutamine	4336	rs41456348	T	C	C	321668	0.0108039	0.0110312	0.327387	NA
Chol	noDM	UKB	MT-TQ	Q	tRNA glutamine	4336	rs41456348	T	C	C	291986	0.0106725	0.0117751	0.364747	NA
Chol	DM	UKB	MT-TQ	Q	tRNA glutamine	4336	rs41456348	T	C	C	29682	0.0162743	0.0361385	0.652475	NA
Chol	Overall	UKB	MT-ND2	ND2	NADH dehydrogenase subunit 2	4529	-	A	T	T	321873	0.0210255	0.00965153	0.0293725	NA
Chol	noDM	UKB	MT-ND2	ND2	NADH dehydrogenase subunit 2	4529	-	A	T	T	292163	0.0215969	0.0103084	0.0361647	NA
Chol	DM	UKB	MT-ND2	ND2	NADH dehydrogenase subunit 2	4529	-	A	T	T	29710	0.0237214	0.0314362	0.450501	NA
Chol	Overall	BiLEVE	MT-ND2	ND2	NADH dehydrogenase subunit 2	4561	-	T	C	C	38935	0.0624922	0.043597	0.15175	NA
Chol	noDM	BiLEVE	MT-ND2	ND2	NADH dehydrogenase subunit 2	4561	-	T	C	C	34591	0.082038	0.0471205	0.081688	NA
Chol	DM	BiLEVE	MT-ND2	ND2	NADH dehydrogenase subunit 2	4561	-	T	C	C	4344	-0.071529	0.140407	0.610469	NA
Chol	Overall	UKB	MT-ND2	ND2	NADH dehydrogenase subunit 2	4561	-	T	C	C	321732	0.0221804	0.0154092	0.150031	NA
Chol	noDM	UKB	MT-ND2	ND2	NADH dehydrogenase subunit 2	4561	-	T	C	C	292038	0.0214209	0.0164782	0.193619	NA
Chol	DM	UKB	MT-ND2	ND2	NADH dehydrogenase subunit 2	4561	-	T	C	C	29694	0.0271286	0.0495942	0.584375	NA
Chol	Overall	BiLEVE	MT-ND2	ND2	NADH dehydrogenase subunit 2	4580	-	G	A	A	38829	-0.0132937	0.0271836	0.62482	NA
Chol	noDM	BiLEVE	MT-ND2	ND2	NADH dehydrogenase subunit 2	4580	-	G	A	A	34499	-0.00233348	0.0297278	0.937435	NA
Chol	DM	BiLEVE	MT-ND2	ND2	NADH dehydrogenase subunit 2	4580	-	G	A	A	4330	-0.0899848	0.079277	0.25641	NA
Chol	Overall	UKB	MT-ND2	ND2	NADH dehydrogenase subunit 2	4580	-	G	A	A	320932	-0.00650324	0.00943839	0.490811	NA
Chol	noDM	UKB	MT-ND2	ND2	NADH dehydrogenase subunit 2	4580	-	G	A	A	291319	-0.00154426	0.0100872	0.878326	NA
Chol	DM	UKB	MT-ND2	ND2	NADH dehydrogenase subunit 2	4580	-	G	A	A	29613	-0.0418634	0.0305562	0.170683	NA
Chol	Overall	BiLEVE	MT-ND2	ND2	NADH dehydrogenase subunit 2	4646	rs375312364	T	C	C	38944	0.0360588	0.0326674	0.269679	NA
Chol	noDM	BiLEVE	MT-ND2	ND2	NADH dehydrogenase subunit 2	4646	rs375312364	T	C	C	34600	0.0443098	0.0355818	0.213032	NA
Chol	DM	BiLEVE	MT-ND2	ND2	NADH dehydrogenase subunit 2	4646	rs375312364	T	C	C	4344	0.0149771	0.0983413	0.87896	NA
Chol	Overall	BiLEVE	MT-ND2	ND2	NADH dehydrogenase subunit 2	4769	rs3021086	G	A	A	38892	0.0667748	0.0310419	0.031473	NA
Chol	noDM	BiLEVE	MT-ND2	ND2	NADH dehydrogenase subunit 2	4769	rs3021086	G	A	A	34555	0.0586959	0.0338922	0.0833111	NA
Chol	DM	BiLEVE	MT-ND2	ND2	NADH dehydrogenase subunit 2	4769	rs3021086	G	A	A	4337	0.173371	0.0917122	0.0587739	NA
Chol	Overall	UKB	MT-ND2	ND2	NADH dehydrogenase subunit 2	4769	rs3021086	G	A	A	321696	-0.0108154	0.010806	0.31689	NA
Chol	noDM	UKB	MT-ND2	ND2	NADH dehydrogenase subunit 2	4769	rs3021086	G	A	A	292004	-0.0096273	0.0115673	0.405249	NA
Chol	DM	UKB	MT-ND2	ND2	NADH dehydrogenase subunit 2	4769	rs3021086	G	A	A	29692	-0.0331823	0.0344572	0.335554	NA
Chol	Overall	BiLEVE	MT-ND2	ND2	NADH dehydrogenase subunit 2	4793	-	A	G	G	38905	-0.0341432	0.0417277	0.413226	NA
Chol	noDM	BiLEVE	MT-ND2	ND2	NADH dehydrogenase subunit 2	4793	-	A	G	G	34566	-0.0188063	0.0452209	0.677503	NA
Chol	DM	BiLEVE	MT-ND2	ND2	NADH dehydrogenase subunit 2	4793	-	A	G	G	4339	-0.190135	0.131043	0.146871	NA
Chol	Overall	UKB	MT-ND2	ND2	NADH dehydrogenase subunit 2	4793	-	A	G	G	321695	-0.0174951	0.0147049	0.234147	NA
Chol	noDM	UKB	MT-ND2	ND2	NADH dehydrogenase subunit 2	4793	-	A	G	G	292000	-0.0195421	0.0157108	0.213551	NA
Chol	DM	UKB	MT-ND2	ND2	NADH dehydrogenase subunit 2	4793	-	A	G	G	29695	0.00216585	0.0477447	0.963818	NA
Chol	Overall	BiLEVE	MT-ND2	ND2	NADH dehydrogenase subunit 2	4917	rs28357980	A	G	G	38882	-0.00172439	0.0162311	0.915392	NA
Chol	noDM	BiLEVE	MT-ND2	ND2	NADH dehydrogenase subunit 2	4917	rs28357980	A	G	G	34542	-0.00853964	0.0177114	0.629699	NA
Chol	DM	BiLEVE	MT-ND2	ND2	NADH dehydrogenase subunit 2	4917	rs28357980	A	G	G	4340	0.0489119	0.0482272	0.310544	NA
Chol	Overall	UKB	MT-ND2	ND2	NADH dehydrogenase subunit 2	4917	rs28357980	A	G	G	321482	-0.00209099	0.00570448	0.713953	NA
Chol	noDM	UKB	MT-ND2	ND2	NADH dehydrogenase subunit 2	4917	rs28357980	A	G	G	291808	-0.00204243	0.00608918	0.737308	NA
Chol	DM	UKB	MT-ND2	ND2	NADH dehydrogenase subunit 2	4917	rs28357980	A	G	G	29674	-0.00190988	0.018687	0.918596	NA
Chol	Overall	BiLEVE	MT-ND2	ND2	NADH dehydrogenase subunit 2	5004	-	T	C	C	38924	0.0153122	0.033647	0.649051	NA
Chol	noDM	BiLEVE	MT-ND2	ND2	NADH dehydrogenase subunit 2	5004	-	T	C	C	34582	0.0212261	0.0364217	0.560042	NA
Chol	DM	BiLEVE	MT-ND2	ND2	NADH dehydrogenase subunit 2	5004	-	T	C	C	4342	-0.0430858	0.106913	0.686968	NA
Chol	Overall	UKB	MT-ND2	ND2	NADH dehydrogenase subunit 2	5004	-	T	C	C	321764	0.00522375	0.0119651	0.662415	NA
Chol	noDM	UKB	MT-ND2	ND2	NADH dehydrogenase subunit 2	5004	-	T	C	C	292060	0.00654243	0.012767	0.608339	NA
Chol	DM	UKB	MT-ND2	ND2	NADH dehydrogenase subunit 2	5004	-	T	C	C	29704	0.000431633	0.0393442	0.991247	NA
Chol	Overall	UKB	MT-ND2	ND2	NADH dehydrogenase subunit 2	5046	rs878927053	G	A	A	321308	-0.0154771	0.0122241	0.205472	NA
Chol	noDM	UKB	MT-ND2	ND2	NADH dehydrogenase subunit 2	5046	rs878927053	G	A	A	291644	-0.00585585	0.0130464	0.653541	NA
Chol	DM	UKB	MT-ND2	ND2	NADH dehydrogenase subunit 2	5046	rs878927053	G	A	A	29664	-0.109408	0.0401036	0.00637315	NA
Chol	Overall	BiLEVE	MT-ND2	ND2	NADH dehydrogenase subunit 2	5147	rs367778601	G	A	A	38896	0.00255865	0.0205826	0.901069	NA
Chol	noDM	BiLEVE	MT-ND2	ND2	NADH dehydrogenase subunit 2	5147	rs367778601	G	A	A	34558	0.00749359	0.0223731	0.737674	NA
Chol	DM	BiLEVE	MT-ND2	ND2	NADH dehydrogenase subunit 2	5147	rs367778601	G	A	A	4338	-0.0283668	0.0631458	0.653291	NA
Chol	Overall	UKB	MT-ND2	ND2	NADH dehydrogenase subunit 2	5147	rs367778601	G	A	A	321702	-0.00192582	0.00730043	0.791938	NA
Chol	noDM	UKB	MT-ND2	ND2	NADH dehydrogenase subunit 2	5147	rs367778601	G	A	A	292015	-0.0024086	0.00778895	0.757145	NA
Chol	DM	UKB	MT-ND2	ND2	NADH dehydrogenase subunit 2	5147	rs367778601	G	A	A	29687	0.000416065	0.0240329	0.986188	NA
Chol	Overall	UKB	MT-ND2	ND2	NADH dehydrogenase subunit 2	5390	rs41333444	A	G	G	321838	-0.00168046	0.0158866	0.915758	NA
Chol	noDM	UKB	MT-ND2	ND2	NADH dehydrogenase subunit 2	5390	rs41333444	A	G	G	292138	0.000957223	0.0169995	0.955096	NA
Chol	DM	UKB	MT-ND2	ND2	NADH dehydrogenase subunit 2	5390	rs41333444	A	G	G	29700	-0.0296919	0.0508288	0.55912	NA
Chol	Overall	UKB	MT-ND2	ND2	NADH dehydrogenase subunit 2	5495	rs3020602	T	C	C	321486	0.0174459	0.013523	0.19702	NA
Chol	noDM	UKB	MT-ND2	ND2	NADH dehydrogenase subunit 2	5495	rs3020602	T	C	C	291813	0.0139859	0.0143857	0.330946	NA
Chol	DM	UKB	MT-ND2	ND2	NADH dehydrogenase subunit 2	5495	rs3020602	T	C	C	29673	0.0590724	0.045887	0.197984	NA
Chol	Overall	BiLEVE	MT-NC4	NC4	non-coding nucleotides	5656	-	A	G	G	38928	-0.0551873	0.0426928	0.196137	NA
Chol	noDM	BiLEVE	MT-NC4	NC4	non-coding nucleotides	5656	-	A	G	G	34586	-0.0426793	0.0465884	0.359625	NA
Chol	DM	BiLEVE	MT-NC4	NC4	non-coding nucleotides	5656	-	A	G	G	4342	-0.107924	0.12668	0.394296	NA
Chol	Overall	UKB	MT-NC4	NC4	non-coding nucleotides	5656	-	A	G	G	321775	0.00826436	0.015316	0.58948	NA
Chol	noDM	UKB	MT-NC4	NC4	non-coding nucleotides	5656	-	A	G	G	292072	0.0061919	0.0164492	0.706601	NA
Chol	DM	UKB	MT-NC4	NC4	non-coding nucleotides	5656	-	A	G	G	29703	0.0270174	0.0474051	0.568733	NA
Chol	Overall	UKB	MT-CO1	COI	Cytochrome c oxidase subunit I	5999	rs879118820	T	C	C	321628	0.00557726	0.0120049	0.642232	NA
Chol	noDM	UKB	MT-CO1	COI	Cytochrome c oxidase subunit I	5999	rs879118820	T	C	C	291939	0.00329782	0.0128361	0.797242	NA
Chol	DM	UKB	MT-CO1	COI	Cytochrome c oxidase subunit I	5999	rs879118820	T	C	C	29689	0.0248543	0.0386911	0.520632	NA
Chol	Overall	UKB	MT-CO1	COI	Cytochrome c oxidase subunit I	6047	rs879104796	A	G	G	321764	0.00588127	0.011979	0.623453	NA
Chol	noDM	UKB	MT-CO1	COI	Cytochrome c oxidase subunit I	6047	rs879104796	A	G	G	292070	0.00397309	0.0127996	0.756251	NA
Chol	DM	UKB	MT-CO1	COI	Cytochrome c oxidase subunit I	6047	rs879104796	A	G	G	29694	0.0204733	0.0388665	0.598363	NA
Chol	Overall	UKB	MT-CO1	COI	Cytochrome c oxidase subunit I	6221	rs370472320	T	C	C	321621	-0.00486358	0.013889	0.726208	NA
Chol	noDM	UKB	MT-CO1	COI	Cytochrome c oxidase subunit I	6221	rs370472320	T	C	C	291940	-0.00492769	0.0147964	0.73911	NA
Chol	DM	UKB	MT-CO1	COI	Cytochrome c oxidase subunit I	6221	rs370472320	T	C	C	29681	-0.00377203	0.0464184	0.935235	NA
Chol	Overall	BiLEVE	MT-CO1	COI	Cytochrome c oxidase subunit I	6371	rs878870695	C	T	T	38894	-0.0753391	0.0413901	0.0687336	NA
Chol	noDM	BiLEVE	MT-CO1	COI	Cytochrome c oxidase subunit I	6371	rs878870695	C	T	T	34554	-0.0553222	0.0445917	0.214747	NA
Chol	DM	BiLEVE	MT-CO1	COI	Cytochrome c oxidase subunit I	6371	rs878870695	C	T	T	4340	-0.277851	0.137515	0.0433919	NA
Chol	Overall	UKB	MT-CO1	COI	Cytochrome c oxidase subunit I	6371	rs878870695	C	T	T	321406	-0.0103768	0.0144841	0.473729	NA
Chol	noDM	UKB	MT-CO1	COI	Cytochrome c oxidase subunit I	6371	rs878870695	C	T	T	291743	-0.0134118	0.0154255	0.384599	NA
Chol	DM	UKB	MT-CO1	COI	Cytochrome c oxidase subunit I	6371	rs878870695	C	T	T	29663	0.02074	0.0485655	0.669344	NA
Chol	Overall	BiLEVE	MT-CO1	COI	Cytochrome c oxidase subunit I	6734	-	G	A	A	38793	0.0118881	0.0481699	0.805068	NA
Chol	noDM	BiLEVE	MT-CO1	COI	Cytochrome c oxidase subunit I	6734	-	G	A	A	34467	0.00778278	0.0528133	0.882845	NA
Chol	DM	BiLEVE	MT-CO1	COI	Cytochrome c oxidase subunit I	6734	-	G	A	A	4326	0.0250171	0.138138	0.856296	NA
Chol	Overall	UKB	MT-CO1	COI	Cytochrome c oxidase subunit I	6734	-	G	A	A	321037	0.00466359	0.0165977	0.778728	NA
Chol	noDM	UKB	MT-CO1	COI	Cytochrome c oxidase subunit I	6734	-	G	A	A	291416	0.0104398	0.0177998	0.557533	NA
Chol	DM	UKB	MT-CO1	COI	Cytochrome c oxidase subunit I	6734	-	G	A	A	29621	-0.0326828	0.0520347	0.529946	NA
Chol	Overall	BiLEVE	MT-CO1	COI	Cytochrome c oxidase subunit I	6776	-	T	C	C	38912	-0.0125974	0.0216745	0.561103	NA
Chol	noDM	BiLEVE	MT-CO1	COI	Cytochrome c oxidase subunit I	6776	-	T	C	C	34571	-0.0244981	0.0236136	0.29953	NA
Chol	DM	BiLEVE	MT-CO1	COI	Cytochrome c oxidase subunit I	6776	-	T	C	C	4341	0.059822	0.065149	0.358548	NA
Chol	Overall	UKB	MT-CO1	COI	Cytochrome c oxidase subunit I	6776	-	T	C	C	321565	-0.00312799	0.00758195	0.679931	NA
Chol	noDM	UKB	MT-CO1	COI	Cytochrome c oxidase subunit I	6776	-	T	C	C	291880	-0.00403981	0.00809991	0.617957	NA
Chol	DM	UKB	MT-CO1	COI	Cytochrome c oxidase subunit I	6776	-	T	C	C	29685	-0.00598424	0.0246359	0.808079	NA
Chol	Overall	BiLEVE	MT-CO1	COI	Cytochrome c oxidase subunit I	7028	-	T	C	C	38918	0.0114078	0.00978498	0.243684	NA
Chol	noDM	BiLEVE	MT-CO1	COI	Cytochrome c oxidase subunit I	7028	-	T	C	C	34579	0.00841571	0.0106667	0.430133	NA
Chol	DM	BiLEVE	MT-CO1	COI	Cytochrome c oxidase subunit I	7028	-	T	C	C	4339	0.0269814	0.0293066	0.35728	NA
Chol	Overall	UKB	MT-CO1	COI	Cytochrome c oxidase subunit I	7028	-	T	C	C	321622	0.0039477	0.0034312	0.249926	NA
Chol	noDM	UKB	MT-CO1	COI	Cytochrome c oxidase subunit I	7028	-	T	C	C	291933	0.00269916	0.00366335	0.461244	NA
Chol	DM	UKB	MT-CO1	COI	Cytochrome c oxidase subunit I	7028	-	T	C	C	29689	0.0140807	0.0112171	0.209386	NA
Chol	Overall	BiLEVE	MT-TS1	S(UCN)	tRNA serine 1	7476	rs201950015	C	T	T	38928	0.0531053	0.035096	0.130251	NA
Chol	noDM	BiLEVE	MT-TS1	S(UCN)	tRNA serine 1	7476	rs201950015	C	T	T	34584	0.0261587	0.0383182	0.494819	NA
Chol	DM	BiLEVE	MT-TS1	S(UCN)	tRNA serine 1	7476	rs201950015	C	T	T	4344	0.22148	0.103678	0.0327174	NA
Chol	Overall	UKB	MT-TS1	S(UCN)	tRNA serine 1	7476	rs201950015	C	T	T	321841	-0.0132959	0.0126204	0.292102	NA
Chol	noDM	UKB	MT-TS1	S(UCN)	tRNA serine 1	7476	rs201950015	C	T	T	292137	-0.0100186	0.0134577	0.456605	NA
Chol	DM	UKB	MT-TS1	S(UCN)	tRNA serine 1	7476	rs201950015	C	T	T	29704	-0.040126	0.0417667	0.336703	NA
Chol	Overall	BiLEVE	MT-CO2	COII	Cytochrome c oxidase subunit II	7768	rs41534044	A	G	G	38939	-0.0593592	0.0242286	0.0142914	NA
Chol	noDM	BiLEVE	MT-CO2	COII	Cytochrome c oxidase subunit II	7768	rs41534044	A	G	G	34595	-0.0711023	0.0263925	0.00706267	NA
Chol	DM	BiLEVE	MT-CO2	COII	Cytochrome c oxidase subunit II	7768	rs41534044	A	G	G	4344	0.0184042	0.0728771	0.800637	NA
Chol	Overall	UKB	MT-CO2	COII	Cytochrome c oxidase subunit II	7768	rs41534044	A	G	G	321839	0.00801083	0.00856073	0.349395	NA
Chol	noDM	UKB	MT-CO2	COII	Cytochrome c oxidase subunit II	7768	rs41534044	A	G	G	292133	0.00720559	0.00915249	0.431118	NA
Chol	DM	UKB	MT-CO2	COII	Cytochrome c oxidase subunit II	7768	rs41534044	A	G	G	29706	0.0113023	0.0276148	0.682336	NA
Chol	Overall	BiLEVE	MT-CO2	COII	Cytochrome c oxidase subunit II	8251	rs3021089	G	A	A	38910	0.00200427	0.0209612	0.923824	NA
Chol	noDM	BiLEVE	MT-CO2	COII	Cytochrome c oxidase subunit II	8251	rs3021089	G	A	A	34567	0.00989199	0.0228572	0.665182	NA
Chol	DM	BiLEVE	MT-CO2	COII	Cytochrome c oxidase subunit II	8251	rs3021089	G	A	A	4343	-0.0483432	0.0625346	0.439527	NA
Chol	Overall	BiLEVE	MT-CO2	COII	Cytochrome c oxidase subunit II	8269	-	G	A	A	38907	0.00566763	0.0269979	0.833724	NA
Chol	noDM	BiLEVE	MT-CO2	COII	Cytochrome c oxidase subunit II	8269	-	G	A	A	34566	0.0309144	0.0293989	0.293015	NA
Chol	DM	BiLEVE	MT-CO2	COII	Cytochrome c oxidase subunit II	8269	-	G	A	A	4341	-0.19571	0.0813602	0.0161931	NA
Chol	Overall	UKB	MT-CO2	COII	Cytochrome c oxidase subunit II	8269	-	G	A	A	321257	-0.00936978	0.00961711	0.329917	NA
Chol	noDM	UKB	MT-CO2	COII	Cytochrome c oxidase subunit II	8269	-	G	A	A	291612	-0.0109565	0.0102583	0.285494	NA
Chol	DM	UKB	MT-CO2	COII	Cytochrome c oxidase subunit II	8269	-	G	A	A	29645	0.016358	0.0317366	0.606257	NA
Chol	Overall	UKB	MT-ATP8	ATPase8	ATP synthase F0 subunit 8	8448	rs879056797	T	C	C	321882	0.00145427	0.0153354	0.924449	NA
Chol	noDM	UKB	MT-ATP8	ATPase8	ATP synthase F0 subunit 8	8448	rs879056797	T	C	C	292173	0.00320587	0.0163452	0.844505	NA
Chol	DM	UKB	MT-ATP8	ATPase8	ATP synthase F0 subunit 8	8448	rs879056797	T	C	C	29709	-0.0182967	0.0509985	0.71977	NA
Chol	Overall	BiLEVE	MT-ATP6	ATPase6	ATP synthase F0 subunit 6	8697	rs879233543	G	A	A	38882	0.000506227	0.0161989	0.97507	NA
Chol	noDM	BiLEVE	MT-ATP6	ATPase6	ATP synthase F0 subunit 6	8697	rs879233543	G	A	A	34545	-0.00560098	0.0176725	0.751296	NA
Chol	DM	BiLEVE	MT-ATP6	ATPase6	ATP synthase F0 subunit 6	8697	rs879233543	G	A	A	4337	0.0495735	0.0482201	0.303976	NA
Chol	Overall	UKB	MT-ATP6	ATPase6	ATP synthase F0 subunit 6	8697	rs879233543	G	A	A	321541	-0.00245776	0.00569685	0.66616	NA
Chol	noDM	UKB	MT-ATP6	ATPase6	ATP synthase F0 subunit 6	8697	rs879233543	G	A	A	291866	-0.00245623	0.00608136	0.68629	NA
Chol	DM	UKB	MT-ATP6	ATPase6	ATP synthase F0 subunit 6	8697	rs879233543	G	A	A	29675	-0.00173263	0.0186519	0.925989	NA
Chol	Overall	BiLEVE	MT-ATP6	ATPase6	ATP synthase F0 subunit 6	8994	rs28358887,COSM6716156,COSM6716157	G	A	A	38770	-0.00856618	0.0331717	0.796225	NA
Chol	noDM	BiLEVE	MT-ATP6	ATPase6	ATP synthase F0 subunit 6	8994	rs28358887,COSM6716156,COSM6716157	G	A	A	34445	0.00764556	0.0366039	0.834549	NA
Chol	DM	BiLEVE	MT-ATP6	ATPase6	ATP synthase F0 subunit 6	8994	rs28358887,COSM6716156,COSM6716157	G	A	A	4325	-0.113743	0.0908887	0.210837	NA
Chol	Overall	UKB	MT-ATP6	ATPase6	ATP synthase F0 subunit 6	8994	rs28358887,COSM6716156,COSM6716157	G	A	A	321833	-0.0201559	0.0114829	0.0792094	NA
Chol	noDM	UKB	MT-ATP6	ATPase6	ATP synthase F0 subunit 6	8994	rs28358887,COSM6716156,COSM6716157	G	A	A	292132	-0.0120424	0.0122603	0.325991	NA
Chol	DM	UKB	MT-ATP6	ATPase6	ATP synthase F0 subunit 6	8994	rs28358887,COSM6716156,COSM6716157	G	A	A	29701	-0.0971449	0.0375274	0.00964035	NA
Chol	Overall	BiLEVE	MT-ATP6	ATPase6	ATP synthase F0 subunit 6	9055	rs193303045	G	A	A	38898	0.033847	0.0169592	0.0459635	NA
Chol	noDM	BiLEVE	MT-ATP6	ATPase6	ATP synthase F0 subunit 6	9055	rs193303045	G	A	A	34558	0.0282678	0.0184112	0.124704	NA
Chol	DM	BiLEVE	MT-ATP6	ATPase6	ATP synthase F0 subunit 6	9055	rs193303045	G	A	A	4340	0.0795226	0.0525683	0.130416	NA
Chol	Overall	UKB	MT-ATP6	ATPase6	ATP synthase F0 subunit 6	9055	rs193303045	G	A	A	321290	-0.0084085	0.00595048	0.157633	NA
Chol	noDM	UKB	MT-ATP6	ATPase6	ATP synthase F0 subunit 6	9055	rs193303045	G	A	A	291649	-0.00711939	0.00634982	0.262205	NA
Chol	DM	UKB	MT-ATP6	ATPase6	ATP synthase F0 subunit 6	9055	rs193303045	G	A	A	29641	-0.0224737	0.0195521	0.250388	NA
Chol	Overall	UKB	MT-ATP6	ATPase6	ATP synthase F0 subunit 6	9123	COSM1155692,COSM1155693	G	A	A	321643	0.00721715	0.0121873	0.553727	NA
Chol	noDM	UKB	MT-ATP6	ATPase6	ATP synthase F0 subunit 6	9123	COSM1155692,COSM1155693	G	A	A	291953	0.00673294	0.0130018	0.604567	NA
Chol	DM	UKB	MT-ATP6	ATPase6	ATP synthase F0 subunit 6	9123	COSM1155692,COSM1155693	G	A	A	29690	0.0175211	0.0401507	0.662561	NA
Chol	Overall	BiLEVE	MT-CO3	COIII	Cytochrome c oxidase subunit III	9477	rs2853825	G	A	A	38919	-0.0268456	0.0167812	0.109663	NA
Chol	noDM	BiLEVE	MT-CO3	COIII	Cytochrome c oxidase subunit III	9477	rs2853825	G	A	A	34579	-0.0300132	0.0183143	0.101267	NA
Chol	DM	BiLEVE	MT-CO3	COIII	Cytochrome c oxidase subunit III	9477	rs2853825	G	A	A	4340	-0.00761326	0.049727	0.878326	NA
Chol	Overall	UKB	MT-CO3	COIII	Cytochrome c oxidase subunit III	9667	rs41482146	A	G	G	321601	0.0272024	0.0152745	0.074929	NA
Chol	noDM	UKB	MT-CO3	COIII	Cytochrome c oxidase subunit III	9667	rs41482146	A	G	G	291912	0.0193879	0.016311	0.234583	NA
Chol	DM	UKB	MT-CO3	COIII	Cytochrome c oxidase subunit III	9667	rs41482146	A	G	G	29689	0.0994656	0.049839	0.0459716	NA
Chol	Overall	BiLEVE	MT-CO3	COIII	Cytochrome c oxidase subunit III	9698	-	T	C	C	38808	0.0387662	0.0174222	0.0260803	NA
Chol	noDM	BiLEVE	MT-CO3	COIII	Cytochrome c oxidase subunit III	9698	-	T	C	C	34478	0.0307959	0.0188925	0.103098	NA
Chol	DM	BiLEVE	MT-CO3	COIII	Cytochrome c oxidase subunit III	9698	-	T	C	C	4330	0.100212	0.0544932	0.0659877	NA
Chol	Overall	UKB	MT-CO3	COIII	Cytochrome c oxidase subunit III	9698	-	T	C	C	320902	-0.00648602	0.00608515	0.28648	NA
Chol	noDM	UKB	MT-CO3	COIII	Cytochrome c oxidase subunit III	9698	-	T	C	C	291301	-0.00450865	0.0064933	0.48746	NA
Chol	DM	UKB	MT-CO3	COIII	Cytochrome c oxidase subunit III	9698	-	T	C	C	29601	-0.0239459	0.0200051	0.231321	NA
Chol	Overall	BiLEVE	MT-CO3	COIII	Cytochrome c oxidase subunit III	9716	rs41502750	T	C	C	38937	0.0462504	0.0388619	0.234005	NA
Chol	noDM	BiLEVE	MT-CO3	COIII	Cytochrome c oxidase subunit III	9716	rs41502750	T	C	C	34592	0.068576	0.0423295	0.10523	NA
Chol	DM	BiLEVE	MT-CO3	COIII	Cytochrome c oxidase subunit III	9716	rs41502750	T	C	C	4345	-0.0775973	0.117001	0.507226	NA
Chol	Overall	UKB	MT-CO3	COIII	Cytochrome c oxidase subunit III	9716	rs41502750	T	C	C	321817	0.0142015	0.0137545	0.301842	NA
Chol	noDM	UKB	MT-CO3	COIII	Cytochrome c oxidase subunit III	9716	rs41502750	T	C	C	292115	0.0118169	0.0147119	0.421845	NA
Chol	DM	UKB	MT-CO3	COIII	Cytochrome c oxidase subunit III	9716	rs41502750	T	C	C	29702	0.030574	0.0441802	0.488925	NA
Chol	Overall	UKB	MT-CO3	COIII	Cytochrome c oxidase subunit III	9899	rs41345446	T	C	C	321753	-0.0105657	0.0129299	0.413839	NA
Chol	noDM	UKB	MT-CO3	COIII	Cytochrome c oxidase subunit III	9899	rs41345446	T	C	C	292063	-0.00597768	0.013817	0.665282	NA
Chol	DM	UKB	MT-CO3	COIII	Cytochrome c oxidase subunit III	9899	rs41345446	T	C	C	29690	-0.0533158	0.0419113	0.203344	NA
Chol	Overall	BiLEVE	MT-ND3	ND3	NADH dehydrogenase subunit 3	10238	-	T	C	C	38821	-0.00502305	0.0266532	0.850517	NA
Chol	noDM	BiLEVE	MT-ND3	ND3	NADH dehydrogenase subunit 3	10238	-	T	C	C	34495	0.0100068	0.0289033	0.729182	NA
Chol	DM	BiLEVE	MT-ND3	ND3	NADH dehydrogenase subunit 3	10238	-	T	C	C	4326	-0.104711	0.0832626	0.208603	NA
Chol	Overall	UKB	MT-ND3	ND3	NADH dehydrogenase subunit 3	10238	-	T	C	C	321371	0.0151736	0.00928537	0.10223	NA
Chol	noDM	UKB	MT-ND3	ND3	NADH dehydrogenase subunit 3	10238	-	T	C	C	291703	0.0151909	0.00991158	0.125364	NA
Chol	DM	UKB	MT-ND3	ND3	NADH dehydrogenase subunit 3	10238	-	T	C	C	29668	0.0205203	0.0304156	0.499895	NA
Chol	Overall	BiLEVE	MT-ND3	ND3	NADH dehydrogenase subunit 3	10398	rs2853826	A	G	G	38778	0.00110318	0.0119064	0.926179	NA
Chol	noDM	BiLEVE	MT-ND3	ND3	NADH dehydrogenase subunit 3	10398	rs2853826	A	G	G	34457	0.00521895	0.0129461	0.686855	NA
Chol	DM	BiLEVE	MT-ND3	ND3	NADH dehydrogenase subunit 3	10398	rs2853826	A	G	G	4321	-0.026374	0.0364051	0.468823	NA
Chol	Overall	UKB	MT-ND3	ND3	NADH dehydrogenase subunit 3	10398	rs2853826	A	G	G	320447	-0.0110789	0.0041926	0.00823037	NA
Chol	noDM	UKB	MT-ND3	ND3	NADH dehydrogenase subunit 3	10398	rs2853826	A	G	G	290883	-0.0098551	0.00447628	0.0276925	NA
Chol	DM	UKB	MT-ND3	ND3	NADH dehydrogenase subunit 3	10398	rs2853826	A	G	G	29564	-0.0219523	0.0137078	0.109288	NA
Chol	Overall	UKB	MT-ND3	ND3	NADH dehydrogenase subunit 3	10400	rs28358278	C	T	T	321741	0.0484272	0.0434505	0.265049	NA
Chol	noDM	UKB	MT-ND3	ND3	NADH dehydrogenase subunit 3	10400	rs28358278	C	T	T	292041	0.065449	0.0464084	0.158456	NA
Chol	DM	UKB	MT-ND3	ND3	NADH dehydrogenase subunit 3	10400	rs28358278	C	T	T	29700	-0.0934089	0.141502	0.509179	NA
Chol	Overall	BiLEVE	MT-TR	R	tRNA arginine	10463	rs28358279	T	C	C	38834	-0.00465449	0.0157118	0.767048	NA
Chol	noDM	BiLEVE	MT-TR	R	tRNA arginine	10463	rs28358279	T	C	C	34498	-0.00879107	0.0171235	0.607681	NA
Chol	DM	BiLEVE	MT-TR	R	tRNA arginine	10463	rs28358279	T	C	C	4336	0.025199	0.0471247	0.592864	NA
Chol	Overall	UKB	MT-TR	R	tRNA arginine	10463	rs28358279	T	C	C	321031	-0.00291842	0.00554358	0.598575	NA
Chol	noDM	UKB	MT-TR	R	tRNA arginine	10463	rs28358279	T	C	C	291386	-0.00317616	0.00591802	0.59148	NA
Chol	DM	UKB	MT-TR	R	tRNA arginine	10463	rs28358279	T	C	C	29645	0.00107592	0.0181395	0.952703	NA
Chol	Overall	BiLEVE	MT-ND4L	ND4L	NADH dehydrogenase subunit 4L	10550	rs28358280	A	G	G	38928	0.04227	0.0173792	0.015011	NA
Chol	noDM	BiLEVE	MT-ND4L	ND4L	NADH dehydrogenase subunit 4L	10550	rs28358280	A	G	G	34584	0.0364772	0.0188534	0.0530248	NA
Chol	DM	BiLEVE	MT-ND4L	ND4L	NADH dehydrogenase subunit 4L	10550	rs28358280	A	G	G	4344	0.0913038	0.0541805	0.0920262	NA
Chol	Overall	UKB	MT-ND4L	ND4L	NADH dehydrogenase subunit 4L	10550	rs28358280	A	G	G	321795	-0.00651676	0.00608741	0.284381	NA
Chol	noDM	UKB	MT-ND4L	ND4L	NADH dehydrogenase subunit 4L	10550	rs28358280	A	G	G	292106	-0.00527361	0.00649642	0.416923	NA
Chol	DM	UKB	MT-ND4L	ND4L	NADH dehydrogenase subunit 4L	10550	rs28358280	A	G	G	29689	-0.0188835	0.0199851	0.34473	NA
Chol	Overall	UKB	MT-ND4	ND4	NADH dehydrogenase subunit 4	10819	rs28358283	A	G	G	321780	0.0365701	0.019895	0.0660401	NA
Chol	noDM	UKB	MT-ND4	ND4	NADH dehydrogenase subunit 4	10819	rs28358283	A	G	G	292071	0.0351555	0.0212068	0.0973691	NA
Chol	DM	UKB	MT-ND4	ND4	NADH dehydrogenase subunit 4	10819	rs28358283	A	G	G	29709	0.0570033	0.0660909	0.38842	NA
Chol	Overall	UKB	MT-ND4	ND4	NADH dehydrogenase subunit 4	10873	rs2857284	T	C	C	321608	0.015562	0.027638	0.573392	NA
Chol	noDM	UKB	MT-ND4	ND4	NADH dehydrogenase subunit 4	10873	rs2857284	T	C	C	291922	0.0271748	0.0295862	0.358359	NA
Chol	DM	UKB	MT-ND4	ND4	NADH dehydrogenase subunit 4	10873	rs2857284	T	C	C	29686	-0.0739604	0.0880805	0.401089	NA
Chol	Overall	UKB	MT-ND4	ND4	NADH dehydrogenase subunit 4	10915	rs2857285	T	C	C	321668	-0.00858831	0.0154539	0.578391	NA
Chol	noDM	UKB	MT-ND4	ND4	NADH dehydrogenase subunit 4	10915	rs2857285	T	C	C	291977	-0.00422535	0.0165372	0.798332	NA
Chol	DM	UKB	MT-ND4	ND4	NADH dehydrogenase subunit 4	10915	rs2857285	T	C	C	29691	-0.0479578	0.0494186	0.331834	NA
Chol	Overall	BiLEVE	MT-ND4	ND4	NADH dehydrogenase subunit 4	11251	rs869096886,COSM1138232	A	G	G	38840	-0.0128819	0.0118887	0.278575	NA
Chol	noDM	BiLEVE	MT-ND4	ND4	NADH dehydrogenase subunit 4	11251	rs869096886,COSM1138232	A	G	G	34506	-0.00870402	0.0129619	0.5019	NA
Chol	DM	BiLEVE	MT-ND4	ND4	NADH dehydrogenase subunit 4	11251	rs869096886,COSM1138232	A	G	G	4334	-0.03877	0.0355644	0.275714	NA
Chol	Overall	UKB	MT-ND4	ND4	NADH dehydrogenase subunit 4	11251	rs869096886,COSM1138232	A	G	G	321056	-0.0123237	0.00419744	0.00332497	NA
Chol	noDM	UKB	MT-ND4	ND4	NADH dehydrogenase subunit 4	11251	rs869096886,COSM1138232	A	G	G	291420	-0.011934	0.00448236	0.00775807	NA
Chol	DM	UKB	MT-ND4	ND4	NADH dehydrogenase subunit 4	11251	rs869096886,COSM1138232	A	G	G	29636	-0.016588	0.0136963	0.225856	NA
Chol	Overall	BiLEVE	MT-ND4	ND4	NADH dehydrogenase subunit 4	11299	rs28358285	T	C	C	38928	0.0437455	0.0173212	0.0115557	NA
Chol	noDM	BiLEVE	MT-ND4	ND4	NADH dehydrogenase subunit 4	11299	rs28358285	T	C	C	34589	0.0377466	0.0187917	0.0445784	NA
Chol	DM	BiLEVE	MT-ND4	ND4	NADH dehydrogenase subunit 4	11299	rs28358285	T	C	C	4339	0.0946798	0.0539696	0.0794469	NA
Chol	Overall	UKB	MT-ND4	ND4	NADH dehydrogenase subunit 4	11299	rs28358285	T	C	C	321782	-0.00497848	0.00606965	0.412088	NA
Chol	noDM	UKB	MT-ND4	ND4	NADH dehydrogenase subunit 4	11299	rs28358285	T	C	C	292088	-0.00327818	0.00647765	0.612804	NA
Chol	DM	UKB	MT-ND4	ND4	NADH dehydrogenase subunit 4	11299	rs28358285	T	C	C	29694	-0.0207427	0.0199209	0.297768	NA
Chol	Overall	UKB	MT-ND4	ND4	NADH dehydrogenase subunit 4	11332	rs55714831	C	T	T	321802	0.00504513	0.011956	0.673043	NA
Chol	noDM	UKB	MT-ND4	ND4	NADH dehydrogenase subunit 4	11332	rs55714831	C	T	T	292107	0.00294829	0.0127737	0.817464	NA
Chol	DM	UKB	MT-ND4	ND4	NADH dehydrogenase subunit 4	11332	rs55714831	C	T	T	29695	0.0219056	0.0388304	0.572667	NA
Chol	Overall	BiLEVE	MT-ND4	ND4	NADH dehydrogenase subunit 4	11377	rs193302938	G	A	A	38889	0.0339126	0.0367714	0.356402	NA
Chol	noDM	BiLEVE	MT-ND4	ND4	NADH dehydrogenase subunit 4	11377	rs193302938	G	A	A	34556	-0.0089443	0.0402115	0.82398	NA
Chol	DM	BiLEVE	MT-ND4	ND4	NADH dehydrogenase subunit 4	11377	rs193302938	G	A	A	4333	0.287616	0.107275	0.00736601	NA
Chol	Overall	UKB	MT-ND4	ND4	NADH dehydrogenase subunit 4	11377	rs193302938	G	A	A	321227	-0.0173284	0.0129318	0.180252	NA
Chol	noDM	UKB	MT-ND4	ND4	NADH dehydrogenase subunit 4	11377	rs193302938	G	A	A	291572	-0.0155242	0.0137873	0.260174	NA
Chol	DM	UKB	MT-ND4	ND4	NADH dehydrogenase subunit 4	11377	rs193302938	G	A	A	29655	-0.038424	0.0428754	0.370165	NA
Chol	Overall	BiLEVE	MT-ND4	ND4	NADH dehydrogenase subunit 4	11467	rs2853493,COSM6716752,COSM6716753	A	G	G	38855	0.00517691	0.0116671	0.657248	NA
Chol	noDM	BiLEVE	MT-ND4	ND4	NADH dehydrogenase subunit 4	11467	rs2853493,COSM6716752,COSM6716753	A	G	G	34521	0.000981662	0.0127042	0.938409	NA
Chol	DM	BiLEVE	MT-ND4	ND4	NADH dehydrogenase subunit 4	11467	rs2853493,COSM6716752,COSM6716753	A	G	G	4334	0.0407338	0.035203	0.247291	NA
Chol	Overall	UKB	MT-ND4	ND4	NADH dehydrogenase subunit 4	11467	rs2853493,COSM6716752,COSM6716753	A	G	G	321170	0.00571702	0.00409215	0.162394	NA
Chol	noDM	UKB	MT-ND4	ND4	NADH dehydrogenase subunit 4	11467	rs2853493,COSM6716752,COSM6716753	A	G	G	291526	0.00510794	0.00436935	0.242389	NA
Chol	DM	UKB	MT-ND4	ND4	NADH dehydrogenase subunit 4	11467	rs2853493,COSM6716752,COSM6716753	A	G	G	29644	0.0109712	0.0133662	0.411757	NA
Chol	Overall	BiLEVE	MT-ND4	ND4	NADH dehydrogenase subunit 4	11485	-	T	C	C	38901	0.0151816	0.034506	0.659961	NA
Chol	noDM	BiLEVE	MT-ND4	ND4	NADH dehydrogenase subunit 4	11485	-	T	C	C	34558	-0.0197014	0.0378874	0.603068	NA
Chol	DM	BiLEVE	MT-ND4	ND4	NADH dehydrogenase subunit 4	11485	-	T	C	C	4343	0.201356	0.0979231	0.0398164	NA
Chol	Overall	BiLEVE	MT-ND4	ND4	NADH dehydrogenase subunit 4	11674	rs28358286	C	T	T	38923	0.00715773	0.0353584	0.839579	NA
Chol	noDM	BiLEVE	MT-ND4	ND4	NADH dehydrogenase subunit 4	11674	rs28358286	C	T	T	34582	0.00607517	0.0389011	0.8759	NA
Chol	DM	BiLEVE	MT-ND4	ND4	NADH dehydrogenase subunit 4	11674	rs28358286	C	T	T	4341	-0.00507108	0.0988042	0.959069	NA
Chol	Overall	UKB	MT-ND4	ND4	NADH dehydrogenase subunit 4	11674	rs28358286	C	T	T	321878	-0.0159993	0.012182	0.189065	NA
Chol	noDM	UKB	MT-ND4	ND4	NADH dehydrogenase subunit 4	11674	rs28358286	C	T	T	292167	-0.005541	0.0129967	0.669861	NA
Chol	DM	UKB	MT-ND4	ND4	NADH dehydrogenase subunit 4	11674	rs28358286	C	T	T	29711	-0.113943	0.040108	0.00450154	NA
Chol	Overall	BiLEVE	MT-ND4	ND4	NADH dehydrogenase subunit 4	11719	rs2853495	A	G	G	38900	0.0102589	0.00971649	0.291057	NA
Chol	noDM	BiLEVE	MT-ND4	ND4	NADH dehydrogenase subunit 4	11719	rs2853495	A	G	G	34561	0.00944527	0.0105921	0.372546	NA
Chol	DM	BiLEVE	MT-ND4	ND4	NADH dehydrogenase subunit 4	11719	rs2853495	A	G	G	4339	0.0108052	0.0291096	0.710513	NA
Chol	Overall	BiLEVE	MT-ND4	ND4	NADH dehydrogenase subunit 4	11812	rs3088053	A	G	G	38902	0.00890078	0.0177611	0.616275	NA
Chol	noDM	BiLEVE	MT-ND4	ND4	NADH dehydrogenase subunit 4	11812	rs3088053	A	G	G	34561	0.0130914	0.0193445	0.498568	NA
Chol	DM	BiLEVE	MT-ND4	ND4	NADH dehydrogenase subunit 4	11812	rs3088053	A	G	G	4341	-0.0154215	0.0536029	0.773591	NA
Chol	Overall	UKB	MT-ND4	ND4	NADH dehydrogenase subunit 4	11812	rs3088053	A	G	G	321665	-0.00192321	0.00627431	0.759208	NA
Chol	noDM	UKB	MT-ND4	ND4	NADH dehydrogenase subunit 4	11812	rs3088053	A	G	G	291978	-0.00250873	0.00669557	0.707896	NA
Chol	DM	UKB	MT-ND4	ND4	NADH dehydrogenase subunit 4	11812	rs3088053	A	G	G	29687	0.00395165	0.0206092	0.847946	NA
Chol	Overall	UKB	MT-ND4	ND4	NADH dehydrogenase subunit 4	11914	rs2853496,COSM1155517	G	A	A	321083	0.0138783	0.0128971	0.281894	NA
Chol	noDM	UKB	MT-ND4	ND4	NADH dehydrogenase subunit 4	11914	rs2853496,COSM1155517	G	A	A	291452	0.0163953	0.0137621	0.233522	NA
Chol	DM	UKB	MT-ND4	ND4	NADH dehydrogenase subunit 4	11914	rs2853496,COSM1155517	G	A	A	29631	-0.0108008	0.0423986	0.798923	NA
Chol	Overall	UKB	MT-ND4	ND4	NADH dehydrogenase subunit 4	11947	rs28359168	A	G	G	321786	-0.0131543	0.0124215	0.289605	NA
Chol	noDM	UKB	MT-ND4	ND4	NADH dehydrogenase subunit 4	11947	rs28359168	A	G	G	292085	-0.00243661	0.0132588	0.854192	NA
Chol	DM	UKB	MT-ND4	ND4	NADH dehydrogenase subunit 4	11947	rs28359168	A	G	G	29701	-0.111942	0.0406984	0.00595346	NA
Chol	Overall	BiLEVE	MT-TL2	L(CUN)	tRNA leucine2	12308	rs2853498	A	G	G	38929	0.00755336	0.0116381	0.516328	NA
Chol	noDM	BiLEVE	MT-TL2	L(CUN)	tRNA leucine2	12308	rs2853498	A	G	G	34585	0.00324307	0.012674	0.798042	NA
Chol	DM	BiLEVE	MT-TL2	L(CUN)	tRNA leucine2	12308	rs2853498	A	G	G	4344	0.0437688	0.0350803	0.212218	NA
Chol	Overall	BiLEVE	MT-ND5	ND5	NADH dehydrogenase subunit 5	12372	rs2853499	G	A	A	38907	0.00717637	0.0116383	0.537492	NA
Chol	noDM	BiLEVE	MT-ND5	ND5	NADH dehydrogenase subunit 5	12372	rs2853499	G	A	A	34563	0.0026724	0.0126743	0.833004	NA
Chol	DM	BiLEVE	MT-ND5	ND5	NADH dehydrogenase subunit 5	12372	rs2853499	G	A	A	4344	0.0437204	0.0350883	0.212828	NA
Chol	Overall	UKB	MT-ND5	ND5	NADH dehydrogenase subunit 5	12372	rs2853499	G	A	A	321573	0.00532244	0.00408134	0.192203	NA
Chol	noDM	UKB	MT-ND5	ND5	NADH dehydrogenase subunit 5	12372	rs2853499	G	A	A	291896	0.00473364	0.00435727	0.277312	NA
Chol	DM	UKB	MT-ND5	ND5	NADH dehydrogenase subunit 5	12372	rs2853499	G	A	A	29677	0.0104347	0.0133482	0.434379	NA
Chol	Overall	BiLEVE	MT-ND5	ND5	NADH dehydrogenase subunit 5	12501	rs28397767	G	A	A	38920	-0.00688373	0.0262155	0.792874	NA
Chol	noDM	BiLEVE	MT-ND5	ND5	NADH dehydrogenase subunit 5	12501	rs28397767	G	A	A	34580	0.00549085	0.028452	0.846971	NA
Chol	DM	BiLEVE	MT-ND5	ND5	NADH dehydrogenase subunit 5	12501	rs28397767	G	A	A	4340	-0.0826769	0.0813334	0.30944	NA
Chol	Overall	UKB	MT-ND5	ND5	NADH dehydrogenase subunit 5	12501	rs28397767	G	A	A	321507	0.0142865	0.00915263	0.118543	NA
Chol	noDM	UKB	MT-ND5	ND5	NADH dehydrogenase subunit 5	12501	rs28397767	G	A	A	291835	0.0148906	0.00976783	0.127397	NA
Chol	DM	UKB	MT-ND5	ND5	NADH dehydrogenase subunit 5	12501	rs28397767	G	A	A	29672	0.0154344	0.0300451	0.607459	NA
Chol	Overall	BiLEVE	MT-ND5	ND5	NADH dehydrogenase subunit 5	12612	rs28359172	A	G	G	38865	-0.0243951	0.0153133	0.111153	NA
Chol	noDM	BiLEVE	MT-ND5	ND5	NADH dehydrogenase subunit 5	12612	rs28359172	A	G	G	34533	-0.0132045	0.0166926	0.428927	NA
Chol	DM	BiLEVE	MT-ND5	ND5	NADH dehydrogenase subunit 5	12612	rs28359172	A	G	G	4332	-0.103256	0.0458607	0.0244034	NA
Chol	Overall	UKB	MT-ND5	ND5	NADH dehydrogenase subunit 5	12612	rs28359172	A	G	G	321188	-0.0186639	0.00543607	0.000596275	NONE
Chol	noDM	UKB	MT-ND5	ND5	NADH dehydrogenase subunit 5	12612	rs28359172	A	G	G	291548	-0.0183457	0.00580638	0.00158013	NA
Chol	DM	UKB	MT-ND5	ND5	NADH dehydrogenase subunit 5	12612	rs28359172	A	G	G	29640	-0.0246083	0.017696	0.164354	NA
Chol	Overall	BiLEVE	MT-ND5	ND5	NADH dehydrogenase subunit 5	12633	rs3926883	C	A	A	38839	-0.0399992	0.0360495	0.267195	NA
Chol	noDM	BiLEVE	MT-ND5	ND5	NADH dehydrogenase subunit 5	12633	rs3926883	C	A	A	34510	-0.0819146	0.0396187	0.0386873	NA
Chol	DM	BiLEVE	MT-ND5	ND5	NADH dehydrogenase subunit 5	12633	rs3926883	C	A	A	4329	0.219907	0.101513	0.0303429	NA
Chol	Overall	UKB	MT-ND5	ND5	NADH dehydrogenase subunit 5	12633	rs3926883	C	A	A	321706	-0.0108064	0.0124057	0.383711	NA
Chol	noDM	UKB	MT-ND5	ND5	NADH dehydrogenase subunit 5	12633	rs3926883	C	A	A	292001	-0.00814337	0.0132603	0.539138	NA
Chol	DM	UKB	MT-ND5	ND5	NADH dehydrogenase subunit 5	12633	rs3926883	C	A	A	29705	-0.0342298	0.0401118	0.393467	NA
Chol	Overall	BiLEVE	MT-ND5	ND5	NADH dehydrogenase subunit 5	12705	rs193302956,COSM1155526	C	T	T	38881	-0.0257122	0.0189285	0.174349	NA
Chol	noDM	BiLEVE	MT-ND5	ND5	NADH dehydrogenase subunit 5	12705	rs193302956,COSM1155526	C	T	T	34541	-0.0146721	0.0206032	0.476389	NA
Chol	DM	BiLEVE	MT-ND5	ND5	NADH dehydrogenase subunit 5	12705	rs193302956,COSM1155526	C	T	T	4340	-0.107685	0.0572757	0.0601603	NA
Chol	Overall	UKB	MT-ND5	ND5	NADH dehydrogenase subunit 5	12705	rs193302956,COSM1155526	C	T	T	321566	0.00283762	0.00656948	0.665785	NA
Chol	noDM	UKB	MT-ND5	ND5	NADH dehydrogenase subunit 5	12705	rs193302956,COSM1155526	C	T	T	291893	0.00562784	0.00700989	0.422066	NA
Chol	DM	UKB	MT-ND5	ND5	NADH dehydrogenase subunit 5	12705	rs193302956,COSM1155526	C	T	T	29673	-0.018035	0.0215978	0.403702	NA
Chol	Overall	UKB	MT-ND5	ND5	NADH dehydrogenase subunit 5	13020	rs75577869	T	C	C	321728	0.00360208	0.0150175	0.81044	NA
Chol	noDM	UKB	MT-ND5	ND5	NADH dehydrogenase subunit 5	13020	rs75577869	T	C	C	292036	0.00568959	0.0160451	0.722889	NA
Chol	DM	UKB	MT-ND5	ND5	NADH dehydrogenase subunit 5	13020	rs75577869	T	C	C	29692	-0.0219528	0.0487477	0.652472	NA
Chol	Overall	UKB	MT-ND5	ND5	NADH dehydrogenase subunit 5	13104	rs878871104	A	G	G	320749	-0.00845855	0.0173254	0.625397	NA
Chol	noDM	UKB	MT-ND5	ND5	NADH dehydrogenase subunit 5	13104	rs878871104	A	G	G	291157	-0.00355657	0.0185577	0.848017	NA
Chol	DM	UKB	MT-ND5	ND5	NADH dehydrogenase subunit 5	13104	rs878871104	A	G	G	29592	-0.0396097	0.0549393	0.470932	NA
Chol	Overall	BiLEVE	MT-ND5	ND5	NADH dehydrogenase subunit 5	13105	rs2853501,COSM6716789	A	G	G	38863	0.0856683	0.0452198	0.0581678	NA
Chol	noDM	BiLEVE	MT-ND5	ND5	NADH dehydrogenase subunit 5	13105	rs2853501,COSM6716789	A	G	G	34530	0.10775	0.0494288	0.0292719	NA
Chol	DM	BiLEVE	MT-ND5	ND5	NADH dehydrogenase subunit 5	13105	rs2853501,COSM6716789	A	G	G	4333	-0.063948	0.132417	0.62917	NA
Chol	Overall	UKB	MT-ND5	ND5	NADH dehydrogenase subunit 5	13105	rs2853501,COSM6716789	A	G	G	321190	0.00366079	0.0157266	0.815935	NA
Chol	noDM	UKB	MT-ND5	ND5	NADH dehydrogenase subunit 5	13105	rs2853501,COSM6716789	A	G	G	291539	0.00597027	0.0168311	0.722802	NA
Chol	DM	UKB	MT-ND5	ND5	NADH dehydrogenase subunit 5	13105	rs2853501,COSM6716789	A	G	G	29651	-0.0107371	0.0502521	0.83081	NA
Chol	Overall	BiLEVE	MT-ND5	ND5	NADH dehydrogenase subunit 5	13617	rs2853503	T	C	C	38901	-0.023316	0.0167249	0.163298	NA
Chol	noDM	BiLEVE	MT-ND5	ND5	NADH dehydrogenase subunit 5	13617	rs2853503	T	C	C	34558	-0.0265733	0.0182417	0.145198	NA
Chol	DM	BiLEVE	MT-ND5	ND5	NADH dehydrogenase subunit 5	13617	rs2853503	T	C	C	4343	-0.00585203	0.0497966	0.906454	NA
Chol	Overall	UKB	MT-ND5	ND5	NADH dehydrogenase subunit 5	13617	rs2853503	T	C	C	321557	0.0133251	0.00588409	0.0235384	NA
Chol	noDM	UKB	MT-ND5	ND5	NADH dehydrogenase subunit 5	13617	rs2853503	T	C	C	291886	0.0102242	0.00628074	0.103555	NA
Chol	DM	UKB	MT-ND5	ND5	NADH dehydrogenase subunit 5	13617	rs2853503	T	C	C	29671	0.0408609	0.0192769	0.034041	NA
Chol	Overall	BiLEVE	MT-ND5	ND5	NADH dehydrogenase subunit 5	13708	rs28359178	G	A	A	38806	-0.0208894	0.0143627	0.145839	NA
Chol	noDM	BiLEVE	MT-ND5	ND5	NADH dehydrogenase subunit 5	13708	rs28359178	G	A	A	34475	-0.00906706	0.0156437	0.562189	NA
Chol	DM	BiLEVE	MT-ND5	ND5	NADH dehydrogenase subunit 5	13708	rs28359178	G	A	A	4331	-0.100121	0.0432924	0.0207876	NA
Chol	Overall	UKB	MT-ND5	ND5	NADH dehydrogenase subunit 5	13708	rs28359178	G	A	A	320695	-0.0162785	0.00511645	0.00146479	NA
Chol	noDM	UKB	MT-ND5	ND5	NADH dehydrogenase subunit 5	13708	rs28359178	G	A	A	291084	-0.0165377	0.00546585	0.00248131	NA
Chol	DM	UKB	MT-ND5	ND5	NADH dehydrogenase subunit 5	13708	rs28359178	G	A	A	29611	-0.0164136	0.0166296	0.323645	NA
Chol	Overall	UKB	MT-ND5	ND5	NADH dehydrogenase subunit 5	13759	rs386420024	G	A	A	320598	0.00176973	0.0133437	0.894488	NA
Chol	noDM	UKB	MT-ND5	ND5	NADH dehydrogenase subunit 5	13759	rs386420024	G	A	A	291000	0.00169267	0.0142186	0.905238	NA
Chol	DM	UKB	MT-ND5	ND5	NADH dehydrogenase subunit 5	13759	rs386420024	G	A	A	29598	0.00439621	0.0444957	0.921297	NA
Chol	Overall	UKB	MT-ND5	ND5	NADH dehydrogenase subunit 5	13780	rs41358152	A	G	G	321643	0.0183837	0.00945734	0.0519144	NA
Chol	noDM	UKB	MT-ND5	ND5	NADH dehydrogenase subunit 5	13780	rs41358152	A	G	G	291963	0.018756	0.0101005	0.0633203	NA
Chol	DM	UKB	MT-ND5	ND5	NADH dehydrogenase subunit 5	13780	rs41358152	A	G	G	29680	0.0212109	0.0308193	0.491312	NA
Chol	Overall	BiLEVE	MT-ND5	ND5	NADH dehydrogenase subunit 5	13879	rs879087566	T	C	C	38865	0.0222263	0.0398674	0.577185	NA
Chol	noDM	BiLEVE	MT-ND5	ND5	NADH dehydrogenase subunit 5	13879	rs879087566	T	C	C	34531	0.0548248	0.0436876	0.209514	NA
Chol	DM	BiLEVE	MT-ND5	ND5	NADH dehydrogenase subunit 5	13879	rs879087566	T	C	C	4334	-0.192763	0.114545	0.0924736	NA
Chol	Overall	UKB	MT-ND5	ND5	NADH dehydrogenase subunit 5	13879	rs879087566	T	C	C	321009	-0.0236857	0.0142895	0.0974072	NA
Chol	noDM	UKB	MT-ND5	ND5	NADH dehydrogenase subunit 5	13879	rs879087566	T	C	C	291372	-0.0242417	0.0152508	0.111941	NA
Chol	DM	UKB	MT-ND5	ND5	NADH dehydrogenase subunit 5	13879	rs879087566	T	C	C	29637	-0.00828376	0.0468849	0.859759	NA
Chol	Overall	BiLEVE	MT-ND5	ND5	NADH dehydrogenase subunit 5	13965	rs869156190	T	C	C	38838	-0.0395295	0.0435912	0.364506	NA
Chol	noDM	BiLEVE	MT-ND5	ND5	NADH dehydrogenase subunit 5	13965	rs869156190	T	C	C	34504	-0.0672981	0.0480303	0.161176	NA
Chol	DM	BiLEVE	MT-ND5	ND5	NADH dehydrogenase subunit 5	13965	rs869156190	T	C	C	4334	0.10876	0.120662	0.367445	NA
Chol	Overall	UKB	MT-ND5	ND5	NADH dehydrogenase subunit 5	13965	rs869156190	T	C	C	321259	-0.0102672	0.0155724	0.50969	NA
Chol	noDM	UKB	MT-ND5	ND5	NADH dehydrogenase subunit 5	13965	rs869156190	T	C	C	291610	-0.00873681	0.016609	0.598868	NA
Chol	DM	UKB	MT-ND5	ND5	NADH dehydrogenase subunit 5	13965	rs869156190	T	C	C	29649	-0.0209252	0.0514247	0.684077	NA
Chol	Overall	BiLEVE	MT-ND5	ND5	NADH dehydrogenase subunit 5	13966	rs41535848	A	G	G	38929	-0.0573757	0.0363409	0.114386	NA
Chol	noDM	BiLEVE	MT-ND5	ND5	NADH dehydrogenase subunit 5	13966	rs41535848	A	G	G	34585	-0.0470142	0.0393153	0.231773	NA
Chol	DM	BiLEVE	MT-ND5	ND5	NADH dehydrogenase subunit 5	13966	rs41535848	A	G	G	4344	-0.163608	0.116036	0.158616	NA
Chol	Overall	UKB	MT-ND5	ND5	NADH dehydrogenase subunit 5	13966	rs41535848	A	G	G	321693	-0.0150083	0.0127844	0.240413	NA
Chol	noDM	UKB	MT-ND5	ND5	NADH dehydrogenase subunit 5	13966	rs41535848	A	G	G	292011	-0.0158952	0.0136085	0.242794	NA
Chol	DM	UKB	MT-ND5	ND5	NADH dehydrogenase subunit 5	13966	rs41535848	A	G	G	29682	-0.00815679	0.043088	0.849855	NA
Chol	Overall	BiLEVE	MT-ND5	ND5	NADH dehydrogenase subunit 5	14133	rs879100848	A	G	G	38882	0.00144601	0.0471579	0.975538	NA
Chol	noDM	BiLEVE	MT-ND5	ND5	NADH dehydrogenase subunit 5	14133	rs879100848	A	G	G	34542	-0.0430378	0.0518566	0.406579	NA
Chol	DM	BiLEVE	MT-ND5	ND5	NADH dehydrogenase subunit 5	14133	rs879100848	A	G	G	4340	0.206331	0.132271	0.118854	NA
Chol	Overall	BiLEVE	MT-ND6	ND6	NADH dehydrogenase subunit 6	14167	rs193302977	C	T	T	38934	0.0400189	0.0173837	0.021335	NA
Chol	noDM	BiLEVE	MT-ND6	ND6	NADH dehydrogenase subunit 6	14167	rs193302977	C	T	T	34590	0.0341501	0.0188655	0.0702757	NA
Chol	DM	BiLEVE	MT-ND6	ND6	NADH dehydrogenase subunit 6	14167	rs193302977	C	T	T	4344	0.0882773	0.0540359	0.102399	NA
Chol	Overall	UKB	MT-ND6	ND6	NADH dehydrogenase subunit 6	14167	rs193302977	C	T	T	321799	-0.00758235	0.00608984	0.213103	NA
Chol	noDM	UKB	MT-ND6	ND6	NADH dehydrogenase subunit 6	14167	rs193302977	C	T	T	292099	-0.00655314	0.00649939	0.313326	NA
Chol	DM	UKB	MT-ND6	ND6	NADH dehydrogenase subunit 6	14167	rs193302977	C	T	T	29700	-0.018482	0.0199813	0.354991	NA
Chol	Overall	BiLEVE	MT-ND6	ND6	NADH dehydrogenase subunit 6	14233	rs3915611,COSM1138250,COSM1138251	A	G	G	38925	0.00917083	0.0176697	0.603754	NA
Chol	noDM	BiLEVE	MT-ND6	ND6	NADH dehydrogenase subunit 6	14233	rs3915611,COSM1138250,COSM1138251	A	G	G	34582	0.0133524	0.0192546	0.488023	NA
Chol	DM	BiLEVE	MT-ND6	ND6	NADH dehydrogenase subunit 6	14233	rs3915611,COSM1138250,COSM1138251	A	G	G	4343	-0.0150119	0.0531377	0.777566	NA
Chol	Overall	UKB	MT-ND6	ND6	NADH dehydrogenase subunit 6	14582	rs41354845	A	G	G	318126	0.00506989	0.0126605	0.688826	NA
Chol	noDM	UKB	MT-ND6	ND6	NADH dehydrogenase subunit 6	14582	rs41354845	A	G	G	288806	0.0034723	0.0135079	0.797135	NA
Chol	DM	UKB	MT-ND6	ND6	NADH dehydrogenase subunit 6	14582	rs41354845	A	G	G	29320	0.025659	0.0416798	0.538148	NA
Chol	Overall	UKB	MT-ND6	ND6	NADH dehydrogenase subunit 6	14620	rs879141731,COSM6716820,COSM6716821	C	T	T	321640	0.00275051	0.0118841	0.81697	NA
Chol	noDM	UKB	MT-ND6	ND6	NADH dehydrogenase subunit 6	14620	rs879141731,COSM6716820,COSM6716821	C	T	T	291959	0.000664478	0.0126968	0.958262	NA
Chol	DM	UKB	MT-ND6	ND6	NADH dehydrogenase subunit 6	14620	rs879141731,COSM6716820,COSM6716821	C	T	T	29681	0.0189119	0.0385929	0.624112	NA
Chol	Overall	BiLEVE	MT-CYB	Cytb	Cytochrome b	14766	rs193302980,rs527236041	T	C	C	38886	0.0112242	0.00971352	0.247883	NA
Chol	noDM	BiLEVE	MT-CYB	Cytb	Cytochrome b	14766	rs193302980,rs527236041	T	C	C	34547	0.00919826	0.0105876	0.384976	NA
Chol	DM	BiLEVE	MT-CYB	Cytb	Cytochrome b	14766	rs193302980,rs527236041	T	C	C	4339	0.021496	0.0291117	0.460313	NA
Chol	Overall	BiLEVE	MT-CYB	Cytb	Cytochrome b	14793	rs2853504	A	G	G	38872	0.00483268	0.0219175	0.825488	NA
Chol	noDM	BiLEVE	MT-CYB	Cytb	Cytochrome b	14793	rs2853504	A	G	G	34537	0.00861263	0.0239292	0.718908	NA
Chol	DM	BiLEVE	MT-CYB	Cytb	Cytochrome b	14793	rs2853504	A	G	G	4335	-0.0261795	0.0647964	0.686213	NA
Chol	Overall	BiLEVE	MT-CYB	Cytb	Cytochrome b	14798	rs28357681	T	C	C	38931	0.00477152	0.0130907	0.71549	NA
Chol	noDM	BiLEVE	MT-CYB	Cytb	Cytochrome b	14798	rs28357681	T	C	C	34592	0.01152	0.0142251	0.41804	NA
Chol	DM	BiLEVE	MT-CYB	Cytb	Cytochrome b	14798	rs28357681	T	C	C	4339	-0.0371515	0.0402438	0.355975	NA
Chol	Overall	UKB	MT-CYB	Cytb	Cytochrome b	14798	rs28357681	T	C	C	321674	-0.0112853	0.00460327	0.0142236	NA
Chol	noDM	UKB	MT-CYB	Cytb	Cytochrome b	14798	rs28357681	T	C	C	291986	-0.0103536	0.00491535	0.0351731	NA
Chol	DM	UKB	MT-CYB	Cytb	Cytochrome b	14798	rs28357681	T	C	C	29688	-0.0232057	0.0150287	0.122576	NA
Chol	Overall	UKB	MT-CYB	Cytb	Cytochrome b	14869	rs879218419	G	A	A	306967	-0.00055132	0.0166733	0.973622	NA
Chol	noDM	UKB	MT-CYB	Cytb	Cytochrome b	14869	rs879218419	G	A	A	278583	0.0100099	0.017747	0.57273	NA
Chol	DM	UKB	MT-CYB	Cytb	Cytochrome b	14869	rs879218419	G	A	A	28384	-0.089157	0.0561884	0.11258	NA
Chol	Overall	UKB	MT-CYB	Cytb	Cytochrome b	14872	rs878879194,COSM1133253,COSM1133254	C	T	T	321828	-0.00347844	0.0171049	0.838855	NA
Chol	noDM	UKB	MT-CYB	Cytb	Cytochrome b	14872	rs878879194,COSM1133253,COSM1133254	C	T	T	292130	0.000606461	0.0181913	0.973405	NA
Chol	DM	UKB	MT-CYB	Cytb	Cytochrome b	14872	rs878879194,COSM1133253,COSM1133254	C	T	T	29698	-0.042959	0.0582021	0.46046	NA
Chol	Overall	BiLEVE	MT-CYB	Cytb	Cytochrome b	14905	rs193302983,rs527236203	G	A	A	38873	-0.000956017	0.0161061	0.952668	NA
Chol	noDM	BiLEVE	MT-CYB	Cytb	Cytochrome b	14905	rs193302983,rs527236203	G	A	A	34537	-0.00723491	0.0175663	0.680443	NA
Chol	DM	BiLEVE	MT-CYB	Cytb	Cytochrome b	14905	rs193302983,rs527236203	G	A	A	4336	0.0488286	0.0480439	0.309527	NA
Chol	Overall	UKB	MT-CYB	Cytb	Cytochrome b	14905	rs193302983,rs527236203	G	A	A	321483	-0.0031832	0.0056704	0.574545	NA
Chol	noDM	UKB	MT-CYB	Cytb	Cytochrome b	14905	rs193302983,rs527236203	G	A	A	291808	-0.00317593	0.00605232	0.59976	NA
Chol	DM	UKB	MT-CYB	Cytb	Cytochrome b	14905	rs193302983,rs527236203	G	A	A	29675	-0.00280322	0.0185903	0.880142	NA
Chol	Overall	BiLEVE	MT-CYB	Cytb	Cytochrome b	15043	rs193302985,rs527236043	G	A	A	38869	-0.0113002	0.0244655	0.64417	NA
Chol	noDM	BiLEVE	MT-CYB	Cytb	Cytochrome b	15043	rs193302985,rs527236043	G	A	A	34530	0.00402501	0.0265834	0.879653	NA
Chol	DM	BiLEVE	MT-CYB	Cytb	Cytochrome b	15043	rs193302985,rs527236043	G	A	A	4339	-0.119084	0.0751613	0.113179	NA
Chol	Overall	UKB	MT-CYB	Cytb	Cytochrome b	15043	rs193302985,rs527236043	G	A	A	321318	0.0136801	0.00852307	0.10848	NA
Chol	noDM	UKB	MT-CYB	Cytb	Cytochrome b	15043	rs193302985,rs527236043	G	A	A	291659	0.0153654	0.00910764	0.0915873	NA
Chol	DM	UKB	MT-CYB	Cytb	Cytochrome b	15043	rs193302985,rs527236043	G	A	A	29659	0.00609898	0.0276275	0.825283	NA
Chol	Overall	BiLEVE	MT-CYB	Cytb	Cytochrome b	15218	rs2853506	A	G	G	38865	-0.0207849	0.0247789	0.401578	NA
Chol	noDM	BiLEVE	MT-CYB	Cytb	Cytochrome b	15218	rs2853506	A	G	G	34532	-0.0199709	0.0271143	0.461404	NA
Chol	DM	BiLEVE	MT-CYB	Cytb	Cytochrome b	15218	rs2853506	A	G	G	4333	-0.0306484	0.0719895	0.670323	NA
Chol	Overall	UKB	MT-CYB	Cytb	Cytochrome b	15218	rs2853506	A	G	G	321496	0.0241233	0.00868614	0.00548296	NA
Chol	noDM	UKB	MT-CYB	Cytb	Cytochrome b	15218	rs2853506	A	G	G	291823	0.0195469	0.00925974	0.0347769	NA
Chol	DM	UKB	MT-CYB	Cytb	Cytochrome b	15218	rs2853506	A	G	G	29673	0.0749705	0.028826	0.00930535	NA
Chol	Overall	BiLEVE	MT-CYB	Cytb	Cytochrome b	15257	rs41518645,COSM1138306,COSM1138307	G	A	A	38900	0.0497224	0.0325371	0.126477	NA
Chol	noDM	BiLEVE	MT-CYB	Cytb	Cytochrome b	15257	rs41518645,COSM1138306,COSM1138307	G	A	A	34560	0.020535	0.0355772	0.56381	NA
Chol	DM	BiLEVE	MT-CYB	Cytb	Cytochrome b	15257	rs41518645,COSM1138306,COSM1138307	G	A	A	4340	0.226077	0.0950683	0.0174475	NA
Chol	Overall	UKB	MT-CYB	Cytb	Cytochrome b	15257	rs41518645,COSM1138306,COSM1138307	G	A	A	321666	-0.016831	0.0116949	0.150105	NA
Chol	noDM	UKB	MT-CYB	Cytb	Cytochrome b	15257	rs41518645,COSM1138306,COSM1138307	G	A	A	291980	-0.0141007	0.0124766	0.258404	NA
Chol	DM	UKB	MT-CYB	Cytb	Cytochrome b	15257	rs41518645,COSM1138306,COSM1138307	G	A	A	29686	-0.0425999	0.0385226	0.268803	NA
Chol	Overall	UKB	MT-CYB	Cytb	Cytochrome b	15301	rs193302991,rs527236045	G	A	A	321602	0.00181373	0.0214208	0.932522	NA
Chol	noDM	UKB	MT-CYB	Cytb	Cytochrome b	15301	rs193302991,rs527236045	G	A	A	291917	-0.000272425	0.0229705	0.990537	NA
Chol	DM	UKB	MT-CYB	Cytb	Cytochrome b	15301	rs193302991,rs527236045	G	A	A	29685	0.0205684	0.0671994	0.759546	NA
Chol	Overall	BiLEVE	MT-CYB	Cytb	Cytochrome b	15452	rs193302994,rs527236209	C	A	A	38765	-0.0137747	0.0118959	0.246894	NA
Chol	noDM	BiLEVE	MT-CYB	Cytb	Cytochrome b	15452	rs193302994,rs527236209	C	A	A	34440	-0.00999575	0.0129689	0.440862	NA
Chol	DM	BiLEVE	MT-CYB	Cytb	Cytochrome b	15452	rs193302994,rs527236209	C	A	A	4325	-0.0362875	0.0356231	0.308427	NA
Chol	Overall	UKB	MT-CYB	Cytb	Cytochrome b	15452	rs193302994,rs527236209	C	A	A	320639	-0.012245	0.00419598	0.00352017	NA
Chol	noDM	UKB	MT-CYB	Cytb	Cytochrome b	15452	rs193302994,rs527236209	C	A	A	291052	-0.0120656	0.00448057	0.0070844	NA
Chol	DM	UKB	MT-CYB	Cytb	Cytochrome b	15452	rs193302994,rs527236209	C	A	A	29587	-0.015154	0.0136975	0.268592	NA
Chol	Overall	BiLEVE	MT-CYB	Cytb	Cytochrome b	15693	rs200975632,COSM6716259,COSM6716260	T	C	C	38940	0.0421037	0.0338351	0.213367	NA
Chol	noDM	BiLEVE	MT-CYB	Cytb	Cytochrome b	15693	rs200975632,COSM6716259,COSM6716260	T	C	C	34598	0.0540114	0.0369219	0.143515	NA
Chol	DM	BiLEVE	MT-CYB	Cytb	Cytochrome b	15693	rs200975632,COSM6716259,COSM6716260	T	C	C	4342	0.00292593	0.100398	0.976752	NA
Chol	Overall	UKB	MT-CYB	Cytb	Cytochrome b	15693	rs200975632,COSM6716259,COSM6716260	T	C	C	321883	0.00569549	0.0119648	0.63406	NA
Chol	noDM	UKB	MT-CYB	Cytb	Cytochrome b	15693	rs200975632,COSM6716259,COSM6716260	T	C	C	292173	0.00373753	0.0127838	0.770008	NA
Chol	DM	UKB	MT-CYB	Cytb	Cytochrome b	15693	rs200975632,COSM6716259,COSM6716260	T	C	C	29710	0.0215901	0.0388327	0.578231	NA
Chol	Overall	BiLEVE	MT-CYB	Cytb	Cytochrome b	15758	rs527236193	A	G	G	38918	-0.0340507	0.0349366	0.329744	NA
Chol	noDM	BiLEVE	MT-CYB	Cytb	Cytochrome b	15758	rs527236193	A	G	G	34578	-0.0283405	0.0379013	0.45462	NA
Chol	DM	BiLEVE	MT-CYB	Cytb	Cytochrome b	15758	rs527236193	A	G	G	4340	-0.034829	0.108858	0.749023	NA
Chol	Overall	UKB	MT-CYB	Cytb	Cytochrome b	15758	rs527236193	A	G	G	321687	0.0240226	0.012362	0.0519843	NA
Chol	noDM	UKB	MT-CYB	Cytb	Cytochrome b	15758	rs527236193	A	G	G	292000	0.0259198	0.0131776	0.0491883	NA
Chol	DM	UKB	MT-CYB	Cytb	Cytochrome b	15758	rs527236193	A	G	G	29687	0.00727965	0.0410608	0.859282	NA
Chol	Overall	BiLEVE	MT-CYB	Cytb	Cytochrome b	15833	rs41504845	C	T	T	38911	0.0320049	0.0351196	0.362137	NA
Chol	noDM	BiLEVE	MT-CYB	Cytb	Cytochrome b	15833	rs41504845	C	T	T	34572	0.00149897	0.0381581	0.968665	NA
Chol	DM	BiLEVE	MT-CYB	Cytb	Cytochrome b	15833	rs41504845	C	T	T	4339	0.264162	0.107966	0.0144561	NA
Chol	Overall	UKB	MT-CYB	Cytb	Cytochrome b	15833	rs41504845	C	T	T	321601	0.0125991	0.0122279	0.302841	NA
Chol	noDM	UKB	MT-CYB	Cytb	Cytochrome b	15833	rs41504845	C	T	T	291923	0.0123188	0.0130509	0.345219	NA
Chol	DM	UKB	MT-CYB	Cytb	Cytochrome b	15833	rs41504845	C	T	T	29678	0.0243128	0.0401069	0.544388	NA
Chol	Overall	BiLEVE	MT-CYB	Cytb	Cytochrome b	15884	rs527236195	G	A	A	38858	-0.0281011	0.042211	0.505588	NA
Chol	noDM	BiLEVE	MT-CYB	Cytb	Cytochrome b	15884	rs527236195	G	A	A	34520	-0.0265856	0.0466441	0.568704	NA
Chol	DM	BiLEVE	MT-CYB	Cytb	Cytochrome b	15884	rs527236195	G	A	A	4338	-0.0576938	0.114635	0.614792	NA
Chol	Overall	UKB	MT-CYB	Cytb	Cytochrome b	15884	rs527236195	G	A	A	321221	0.00151749	0.0147568	0.918095	NA
Chol	noDM	UKB	MT-CYB	Cytb	Cytochrome b	15884	rs527236195	G	A	A	291573	0.00118808	0.0156992	0.939675	NA
Chol	DM	UKB	MT-CYB	Cytb	Cytochrome b	15884	rs527236195	G	A	A	29648	0.00722066	0.0500331	0.885251	NA
Chol	Overall	UKB	MT-TT	T	tRNA threonine	15924	-	A	G	G	320811	0.0192047	0.00719785	0.00762812	NA
Chol	noDM	UKB	MT-TT	T	tRNA threonine	15924	-	A	G	G	291201	0.0202701	0.00768076	0.00831366	NA
Chol	DM	UKB	MT-TT	T	tRNA threonine	15924	-	A	G	G	29610	0.0169752	0.023655	0.473	NA
Chol	Overall	BiLEVE	MT-TT	T	tRNA threonine	15928	rs527236198	G	A	A	38714	-0.00132456	0.0161496	0.934633	NA
Chol	noDM	BiLEVE	MT-TT	T	tRNA threonine	15928	rs527236198	G	A	A	34400	-0.00685195	0.0176171	0.697325	NA
Chol	DM	BiLEVE	MT-TT	T	tRNA threonine	15928	rs527236198	G	A	A	4314	0.043786	0.0481067	0.362776	NA
Chol	Overall	UKB	MT-TT	T	tRNA threonine	15928	rs527236198	G	A	A	320138	-0.00220814	0.00568821	0.697872	NA
Chol	noDM	UKB	MT-TT	T	tRNA threonine	15928	rs527236198	G	A	A	290593	-0.00207287	0.00607169	0.732804	NA
Chol	DM	UKB	MT-TT	T	tRNA threonine	15928	rs527236198	G	A	A	29545	-0.00259499	0.0186339	0.889244	NA
Chol	Overall	UKB	MT-HV1	CR:HVS1/HV1	Hypervariable segment 1 [classic:16024-16365]	16145	rs41419246	G	A	A	321446	-0.0215188	0.00944546	0.0227142	NA
Chol	noDM	UKB	MT-HV1	CR:HVS1/HV1	Hypervariable segment 1 [classic:16024-16365]	16145	rs41419246	G	A	A	291776	-0.0221239	0.0100693	0.0280091	NA
Chol	DM	UKB	MT-HV1	CR:HVS1/HV1	Hypervariable segment 1 [classic:16024-16365]	16145	rs41419246	G	A	A	29670	-0.0123822	0.0313492	0.692864	NA
Chol	Overall	BiLEVE	MT-TAS	CR:TAS	termination-associated sequence	16162	rs41466049	A	G	G	38855	0.0223401	0.0315524	0.478931	NA
Chol	noDM	BiLEVE	MT-TAS	CR:TAS	termination-associated sequence	16162	rs41466049	A	G	G	34518	0.0282469	0.0343254	0.410561	NA
Chol	DM	BiLEVE	MT-TAS	CR:TAS	termination-associated sequence	16162	rs41466049	A	G	G	4337	-0.0156601	0.0959337	0.870338	NA
Chol	Overall	BiLEVE	MT-TAS	CR:TAS	termination-associated sequence	16172	rs2853817	T	C	C	38824	-0.00588189	0.0248435	0.812846	NA
Chol	noDM	BiLEVE	MT-TAS	CR:TAS	termination-associated sequence	16172	rs2853817	T	C	C	34484	0.00251453	0.0271228	0.926135	NA
Chol	DM	BiLEVE	MT-TAS	CR:TAS	termination-associated sequence	16172	rs2853817	T	C	C	4340	-0.0690767	0.0733995	0.346703	NA
Chol	Overall	BiLEVE	MT-HV1	CR:HVS1/HV1	Hypervariable segment 1 [classic:16024-16365]	16193	rs879091650	C	T	T	38784	-0.00280814	0.0404145	0.944605	NA
Chol	noDM	BiLEVE	MT-HV1	CR:HVS1/HV1	Hypervariable segment 1 [classic:16024-16365]	16193	rs879091650	C	T	T	34461	0.00707815	0.0437274	0.871409	NA
Chol	DM	BiLEVE	MT-HV1	CR:HVS1/HV1	Hypervariable segment 1 [classic:16024-16365]	16193	rs879091650	C	T	T	4323	-0.075698	0.128813	0.556794	NA
Chol	Overall	UKB	MT-HV1	CR:HVS1/HV1	Hypervariable segment 1 [classic:16024-16365]	16193	rs879091650	C	T	T	320848	-0.00498258	0.0150435	0.740486	NA
Chol	noDM	UKB	MT-HV1	CR:HVS1/HV1	Hypervariable segment 1 [classic:16024-16365]	16193	rs879091650	C	T	T	291247	-0.00318937	0.0160753	0.842731	NA
Chol	DM	UKB	MT-HV1	CR:HVS1/HV1	Hypervariable segment 1 [classic:16024-16365]	16193	rs879091650	C	T	T	29601	0.00271207	0.0487812	0.955664	NA
Chol	Overall	BiLEVE	MT-HV1	CR:HVS1/HV1	Hypervariable segment 1 [classic:16024-16365]	16223	rs2853513	C	T	T	38848	-0.0219758	0.0187351	0.240814	NA
Chol	noDM	BiLEVE	MT-HV1	CR:HVS1/HV1	Hypervariable segment 1 [classic:16024-16365]	16223	rs2853513	C	T	T	34520	-0.0119918	0.0203904	0.556461	NA
Chol	DM	BiLEVE	MT-HV1	CR:HVS1/HV1	Hypervariable segment 1 [classic:16024-16365]	16223	rs2853513	C	T	T	4328	-0.096109	0.0567493	0.0904193	NA
Chol	Overall	UKB	MT-HV1	CR:HVS1/HV1	Hypervariable segment 1 [classic:16024-16365]	16270	rs2857290	C	T	T	320912	0.0134966	0.00600632	0.0246362	NA
Chol	noDM	UKB	MT-HV1	CR:HVS1/HV1	Hypervariable segment 1 [classic:16024-16365]	16270	rs2857290	C	T	T	291286	0.0109754	0.00641015	0.0868638	NA
Chol	DM	UKB	MT-HV1	CR:HVS1/HV1	Hypervariable segment 1 [classic:16024-16365]	16270	rs2857290	C	T	T	29626	0.0365957	0.0197099	0.0633613	NA
Chol	Overall	BiLEVE	MT-HV1	CR:HVS1/HV1	Hypervariable segment 1 [classic:16024-16365]	16298	rs148377232	T	C	C	38880	-0.0129619	0.0241866	0.592021	NA
Chol	noDM	BiLEVE	MT-HV1	CR:HVS1/HV1	Hypervariable segment 1 [classic:16024-16365]	16298	rs148377232	T	C	C	34546	-0.0103303	0.0264559	0.696189	NA
Chol	DM	BiLEVE	MT-HV1	CR:HVS1/HV1	Hypervariable segment 1 [classic:16024-16365]	16298	rs148377232	T	C	C	4334	-0.0352099	0.0704264	0.617134	NA
Chol	Overall	BiLEVE	MT-HV1	CR:HVS1/HV1	Hypervariable segment 1 [classic:16024-16365]	16356	rs62581340	T	C	C	38736	0.031925	0.024602	0.194413	NA
Chol	noDM	BiLEVE	MT-HV1	CR:HVS1/HV1	Hypervariable segment 1 [classic:16024-16365]	16356	rs62581340	T	C	C	34410	0.0332964	0.0268797	0.215457	NA
Chol	DM	BiLEVE	MT-HV1	CR:HVS1/HV1	Hypervariable segment 1 [classic:16024-16365]	16356	rs62581340	T	C	C	4326	0.0469688	0.0723343	0.51616	NA
Chol	Overall	UKB	MT-HV1	CR:HVS1/HV1	Hypervariable segment 1 [classic:16024-16365]	16356	rs62581340	T	C	C	320255	0.00264068	0.0086537	0.760252	NA
Chol	noDM	UKB	MT-HV1	CR:HVS1/HV1	Hypervariable segment 1 [classic:16024-16365]	16356	rs62581340	T	C	C	290729	-0.00122802	0.00922957	0.894152	NA
Chol	DM	UKB	MT-HV1	CR:HVS1/HV1	Hypervariable segment 1 [classic:16024-16365]	16356	rs62581340	T	C	C	29526	0.0423344	0.0285873	0.138649	NA
Chol	Overall	BiLEVE	MT-HV1	CR:HVS1/HV1	Hypervariable segment 1 [classic:16024-16365]	16362	rs62581341	T	C	C	38826	0.0129792	0.0175933	0.460679	NA
Chol	noDM	BiLEVE	MT-HV1	CR:HVS1/HV1	Hypervariable segment 1 [classic:16024-16365]	16362	rs62581341	T	C	C	34493	0.0095687	0.0193316	0.620619	NA
Chol	DM	BiLEVE	MT-HV1	CR:HVS1/HV1	Hypervariable segment 1 [classic:16024-16365]	16362	rs62581341	T	C	C	4333	0.02723	0.0496233	0.583216	NA
Chol	Overall	UKB	MT-HV1	CR:HVS1/HV1	Hypervariable segment 1 [classic:16024-16365]	16362	rs62581341	T	C	C	321006	-0.000437174	0.00618758	0.943674	NA
Chol	noDM	UKB	MT-HV1	CR:HVS1/HV1	Hypervariable segment 1 [classic:16024-16365]	16362	rs62581341	T	C	C	291383	0.0010438	0.00660391	0.874411	NA
Chol	DM	UKB	MT-HV1	CR:HVS1/HV1	Hypervariable segment 1 [classic:16024-16365]	16362	rs62581341	T	C	C	29623	-0.0112285	0.0202963	0.580111	NA
Chol	Overall	UKB	NA	CR:HVS2	Hypervariable segment 2 [classic:73-340 ]	16391	rs869031877	G	A	A	320814	0.0204064	0.00950868	0.031867	NA
Chol	noDM	UKB	NA	CR:HVS2	Hypervariable segment 2 [classic:73-340 ]	16391	rs869031877	G	A	A	291189	0.0185386	0.0101539	0.0678873	NA
Chol	DM	UKB	NA	CR:HVS2	Hypervariable segment 2 [classic:73-340 ]	16391	rs869031877	G	A	A	29625	0.0397193	0.0310266	0.200495	NA

## Sheet: DBP
PHENO	COHORT	ARRAY	GENE	REGION	DESCRIPTION	BP	RS	REF	ALT	A1	OBS_CT	OR.or.BETA	SE.or.LOG(OR)_SE	P	SP2
DBP	Overall	BiLEVE	MT-HV2	CR:HVS2	Hypervariable segment 2 [classic:73-340 ]	73	rs869183622	G	A	A	40726	0.0074311	0.00981211	0.448851	NA
DBP	noDM	BiLEVE	MT-HV2	CR:HVS2	Hypervariable segment 2 [classic:73-340 ]	73	rs869183622	G	A	A	36167	0.00044832	0.010403	0.965626	NA
DBP	DM	BiLEVE	MT-HV2	CR:HVS2	Hypervariable segment 2 [classic:73-340 ]	73	rs869183622	G	A	A	4559	0.0597889	0.0293251	0.0415246	NA
DBP	Overall	UKB	MT-HV2	CR:HVS2	Hypervariable segment 2 [classic:73-340 ]	73	rs869183622	G	A	A	336823	-5.52564e-05	0.0034102	0.987072	NA
DBP	noDM	UKB	MT-HV2	CR:HVS2	Hypervariable segment 2 [classic:73-340 ]	73	rs869183622	G	A	A	305086	-0.0021153	0.00357935	0.554539	NA
DBP	DM	UKB	MT-HV2	CR:HVS2	Hypervariable segment 2 [classic:73-340 ]	73	rs869183622	G	A	A	31737	0.0192762	0.01117	0.0844104	NA
DBP	Overall	BiLEVE	MT-OHR	CR:OH	H-strand origins	150	rs62581312	C	T	T	40700	0.0154486	0.0167446	0.356219	NA
DBP	noDM	BiLEVE	MT-OHR	CR:OH	H-strand origins	150	rs62581312	C	T	T	36145	0.0114605	0.0177444	0.518372	NA
DBP	DM	BiLEVE	MT-OHR	CR:OH	H-strand origins	150	rs62581312	C	T	T	4555	0.0473846	0.0502612	0.34585	NA
DBP	Overall	UKB	MT-OHR	CR:OH	H-strand origins	150	rs62581312	C	T	T	336648	0.00410404	0.00586629	0.48418	NA
DBP	noDM	UKB	MT-OHR	CR:OH	H-strand origins	150	rs62581312	C	T	T	304909	0.00324109	0.00615656	0.598579	NA
DBP	DM	UKB	MT-OHR	CR:OH	H-strand origins	150	rs62581312	C	T	T	31739	0.0138795	0.0192383	0.470639	NA
DBP	Overall	BiLEVE	MT-OHR	CR:OH	H-strand origins	228	rs41323649	G	A	A	40680	-0.0529054	0.0197019	0.00724957	NA
DBP	noDM	BiLEVE	MT-OHR	CR:OH	H-strand origins	228	rs41323649	G	A	A	36125	-0.046513	0.0208254	0.0255241	NA
DBP	DM	BiLEVE	MT-OHR	CR:OH	H-strand origins	228	rs41323649	G	A	A	4555	-0.095836	0.0604446	0.112918	NA
DBP	Overall	UKB	MT-OHR	CR:OH	H-strand origins	228	rs41323649	G	A	A	336412	-0.00304378	0.00690423	0.659317	NA
DBP	noDM	UKB	MT-OHR	CR:OH	H-strand origins	228	rs41323649	G	A	A	304690	-0.000191993	0.00725487	0.978887	NA
DBP	DM	UKB	MT-OHR	CR:OH	H-strand origins	228	rs41323649	G	A	A	31722	-0.0311445	0.0223739	0.163932	NA
DBP	Overall	BiLEVE	MT-TFX	CR:TFX	mtTF1 binding site	239	rs879149197	T	C	C	40697	0.0348732	0.0290592	0.230118	NA
DBP	noDM	BiLEVE	MT-TFX	CR:TFX	mtTF1 binding site	239	rs879149197	T	C	C	36138	0.0248154	0.0306962	0.418854	NA
DBP	DM	BiLEVE	MT-TFX	CR:TFX	mtTF1 binding site	239	rs879149197	T	C	C	4559	0.0981908	0.0896252	0.273324	NA
DBP	Overall	BiLEVE	MT-OHR	CR:OH	H-strand origins	263	rs2853515	G	A	A	40757	0.00250325	0.0465587	0.957122	NA
DBP	noDM	BiLEVE	MT-OHR	CR:OH	H-strand origins	263	rs2853515	G	A	A	36198	-0.0122595	0.0489983	0.802432	NA
DBP	DM	BiLEVE	MT-OHR	CR:OH	H-strand origins	263	rs2853515	G	A	A	4559	0.147832	0.148176	0.318489	NA
DBP	Overall	UKB	MT-TFY	CR:TFY	mtTF1 binding site	295	rs41528348	C	T	T	334674	-0.00497781	0.00547333	0.363104	NA
DBP	noDM	UKB	MT-TFY	CR:TFY	mtTF1 binding site	295	rs41528348	C	T	T	303110	-0.00404387	0.00574948	0.481841	NA
DBP	DM	UKB	MT-TFY	CR:TFY	mtTF1 binding site	295	rs41528348	C	T	T	31564	-0.0114155	0.0177913	0.521116	NA
DBP	Overall	BiLEVE	MT-HV3	CR:HVS3	Hypervariable segment 3	456	rs41356551	C	T	T	40652	0.0244963	0.0250348	0.327838	NA
DBP	noDM	BiLEVE	MT-HV3	CR:HVS3	Hypervariable segment 3	456	rs41356551	C	T	T	36102	0.0317477	0.0265642	0.232044	NA
DBP	DM	BiLEVE	MT-HV3	CR:HVS3	Hypervariable segment 3	456	rs41356551	C	T	T	4550	-0.0273277	0.0744261	0.713502	NA
DBP	Overall	BiLEVE	MT-HV3	CR:HVS3	Hypervariable segment 3	497	rs28660704	C	T	T	40768	0.0351283	0.0227718	0.122929	NA
DBP	noDM	BiLEVE	MT-HV3	CR:HVS3	Hypervariable segment 3	497	rs28660704	C	T	T	36203	0.03318	0.0240961	0.168525	NA
DBP	DM	BiLEVE	MT-HV3	CR:HVS3	Hypervariable segment 3	497	rs28660704	C	T	T	4565	0.0469352	0.0692477	0.497941	NA
DBP	Overall	UKB	MT-HV3	CR:HVS3	Hypervariable segment 3	497	rs28660704	C	T	T	337106	0.00146898	0.00797587	0.853874	NA
DBP	noDM	UKB	MT-HV3	CR:HVS3	Hypervariable segment 3	497	rs28660704	C	T	T	305332	-0.000625233	0.0083614	0.940393	NA
DBP	DM	UKB	MT-HV3	CR:HVS3	Hypervariable segment 3	497	rs28660704	C	T	T	31774	0.0216103	0.0264308	0.413581	NA
DBP	Overall	BiLEVE	MT-RNR1	12S	12S ribosomal RNA	709	rs2853517	G	A	A	40607	0.01053	0.0137707	0.444475	NA
DBP	noDM	BiLEVE	MT-RNR1	12S	12S ribosomal RNA	709	rs2853517	G	A	A	36065	0.0119604	0.0146113	0.413035	NA
DBP	DM	BiLEVE	MT-RNR1	12S	12S ribosomal RNA	709	rs2853517	G	A	A	4542	-0.00213304	0.0409453	0.958455	NA
DBP	Overall	UKB	MT-RNR1	12S	12S ribosomal RNA	709	rs2853517	G	A	A	335522	0.00512355	0.00480773	0.286565	NA
DBP	noDM	UKB	MT-RNR1	12S	12S ribosomal RNA	709	rs2853517	G	A	A	303891	0.00837047	0.00504592	0.097145	NA
DBP	DM	UKB	MT-RNR1	12S	12S ribosomal RNA	709	rs2853517	G	A	A	31631	-0.0265662	0.0157545	0.0917554	NA
DBP	Overall	UKB	MT-RNR1	12S	12S ribosomal RNA	750	rs2853518	G	A	A	329947	-0.0134081	0.0132123	0.310193	NA
DBP	noDM	UKB	MT-RNR1	12S	12S ribosomal RNA	750	rs2853518	G	A	A	298968	-0.0144707	0.0138537	0.296239	NA
DBP	DM	UKB	MT-RNR1	12S	12S ribosomal RNA	750	rs2853518	G	A	A	30979	-0.00913687	0.0436967	0.834374	NA
DBP	Overall	BiLEVE	MT-RNR1	12S	12S ribosomal RNA	1243	rs28358572	T	C	C	40788	0.003609	0.0359983	0.920143	NA
DBP	noDM	BiLEVE	MT-RNR1	12S	12S ribosomal RNA	1243	rs28358572	T	C	C	36221	0.0116796	0.038504	0.761638	NA
DBP	DM	BiLEVE	MT-RNR1	12S	12S ribosomal RNA	1243	rs28358572	T	C	C	4567	-0.0720022	0.1009	0.475512	NA
DBP	Overall	UKB	MT-RNR1	12S	12S ribosomal RNA	1243	rs28358572	T	C	C	337358	-0.00594509	0.0122314	0.626931	NA
DBP	noDM	UKB	MT-RNR1	12S	12S ribosomal RNA	1243	rs28358572	T	C	C	305562	0.000652241	0.0128307	0.959458	NA
DBP	DM	UKB	MT-RNR1	12S	12S ribosomal RNA	1243	rs28358572	T	C	C	31796	-0.0726933	0.0402863	0.0711754	NA
DBP	Overall	BiLEVE	MT-RNR1	12S	12S ribosomal RNA	1438	rs2001030	G	A	A	40722	0.00844811	0.0294719	0.774382	NA
DBP	noDM	BiLEVE	MT-RNR1	12S	12S ribosomal RNA	1438	rs2001030	G	A	A	36162	0.00565834	0.0313299	0.856678	NA
DBP	DM	BiLEVE	MT-RNR1	12S	12S ribosomal RNA	1438	rs2001030	G	A	A	4560	0.0361723	0.0863572	0.675332	NA
DBP	Overall	UKB	MT-RNR1	12S	12S ribosomal RNA	1438	rs2001030	G	A	A	336721	-0.00376768	0.0102747	0.713848	NA
DBP	noDM	UKB	MT-RNR1	12S	12S ribosomal RNA	1438	rs2001030	G	A	A	304977	0.000912312	0.0108094	0.932739	NA
DBP	DM	UKB	MT-RNR1	12S	12S ribosomal RNA	1438	rs2001030	G	A	A	31744	-0.0508562	0.0329312	0.122521	NA
DBP	Overall	BiLEVE	MT-RNR2	16S	16S ribosomal RNA	1719	rs3928305	G	A	A	40703	-0.00273868	0.0177548	0.877414	NA
DBP	noDM	BiLEVE	MT-RNR2	16S	16S ribosomal RNA	1719	rs3928305	G	A	A	36143	-0.00634293	0.0187713	0.735436	NA
DBP	DM	BiLEVE	MT-RNR2	16S	16S ribosomal RNA	1719	rs3928305	G	A	A	4560	0.0321175	0.0543276	0.554428	NA
DBP	Overall	UKB	MT-RNR2	16S	16S ribosomal RNA	1719	rs3928305	G	A	A	336733	-0.00811906	0.00616541	0.187883	NA
DBP	noDM	UKB	MT-RNR2	16S	16S ribosomal RNA	1719	rs3928305	G	A	A	304991	-0.00763799	0.00646689	0.237567	NA
DBP	DM	UKB	MT-RNR2	16S	16S ribosomal RNA	1719	rs3928305	G	A	A	31742	-0.0120246	0.0203257	0.554125	NA
DBP	Overall	BiLEVE	MT-RNR2	16S	16S ribosomal RNA	1721	rs200626438	C	T	T	40783	0.0292593	0.0302491	0.333412	NA
DBP	noDM	BiLEVE	MT-RNR2	16S	16S ribosomal RNA	1721	rs200626438	C	T	T	36216	0.0227108	0.0320762	0.478934	NA
DBP	DM	BiLEVE	MT-RNR2	16S	16S ribosomal RNA	1721	rs200626438	C	T	T	4567	0.0658378	0.0903465	0.466207	NA
DBP	Overall	UKB	MT-RNR2	16S	16S ribosomal RNA	1721	rs200626438	C	T	T	337257	0.00570812	0.0105405	0.588136	NA
DBP	noDM	UKB	MT-RNR2	16S	16S ribosomal RNA	1721	rs200626438	C	T	T	305461	0.00294143	0.0110591	0.79026	NA
DBP	DM	UKB	MT-RNR2	16S	16S ribosomal RNA	1721	rs200626438	C	T	T	31796	0.0308261	0.0346523	0.373697	NA
DBP	Overall	BiLEVE	MT-RNR2	16S	16S ribosomal RNA	1811	rs28358576	A	G	G	40751	0.0155689	0.0145303	0.283962	NA
DBP	noDM	BiLEVE	MT-RNR2	16S	16S ribosomal RNA	1811	rs28358576	A	G	G	36188	0.0186926	0.0153574	0.223545	NA
DBP	DM	BiLEVE	MT-RNR2	16S	16S ribosomal RNA	1811	rs28358576	A	G	G	4563	-0.00258492	0.0445806	0.953765	NA
DBP	Overall	UKB	MT-RNR2	16S	16S ribosomal RNA	2158	rs41349444	T	C	C	337357	0.0172818	0.0144143	0.230557	NA
DBP	noDM	UKB	MT-RNR2	16S	16S ribosomal RNA	2158	rs41349444	T	C	C	305557	0.0177253	0.0151375	0.241619	NA
DBP	DM	UKB	MT-RNR2	16S	16S ribosomal RNA	2158	rs41349444	T	C	C	31800	0.0225213	0.0469761	0.631643	NA
DBP	Overall	BiLEVE	MT-RNR2	16S	16S ribosomal RNA	2706	rs2854128	G	A	A	40749	0.00223314	0.00983287	0.82034	NA
DBP	noDM	BiLEVE	MT-RNR2	16S	16S ribosomal RNA	2706	rs2854128	G	A	A	36182	-0.00268785	0.0104228	0.796499	NA
DBP	DM	BiLEVE	MT-RNR2	16S	16S ribosomal RNA	2706	rs2854128	G	A	A	4567	0.0367092	0.0294772	0.21307	NA
DBP	Overall	UKB	MT-RNR2	16S	16S ribosomal RNA	2706	rs2854128	G	A	A	336921	0.00338759	0.00341878	0.321747	NA
DBP	noDM	UKB	MT-RNR2	16S	16S ribosomal RNA	2706	rs2854128	G	A	A	305163	0.0016513	0.0035882	0.64537	NA
DBP	DM	UKB	MT-RNR2	16S	16S ribosomal RNA	2706	rs2854128	G	A	A	31758	0.0189946	0.0112043	0.0900275	NA
DBP	Overall	BiLEVE	MT-RNR2	16S	16S ribosomal RNA	3010	rs3928306	G	A	A	40730	-0.0157603	0.0111081	0.155961	NA
DBP	noDM	BiLEVE	MT-RNR2	16S	16S ribosomal RNA	3010	rs3928306	G	A	A	36171	-0.0220528	0.0117695	0.0609768	NA
DBP	DM	BiLEVE	MT-RNR2	16S	16S ribosomal RNA	3010	rs3928306	G	A	A	4559	0.0404424	0.0333604	0.225465	NA
DBP	Overall	UKB	MT-RNR2	16S	16S ribosomal RNA	3010	rs3928306	G	A	A	336640	0.00450329	0.00386944	0.244502	NA
DBP	noDM	UKB	MT-RNR2	16S	16S ribosomal RNA	3010	rs3928306	G	A	A	304912	0.00376529	0.00406168	0.353913	NA
DBP	DM	UKB	MT-RNR2	16S	16S ribosomal RNA	3010	rs3928306	G	A	A	31728	0.013382	0.0126658	0.290725	NA
DBP	Overall	BiLEVE	MT-RNR2	16S	16S ribosomal RNA	3197	rs2854131	T	C	C	40676	-0.000148744	0.0168926	0.992975	NA
DBP	noDM	BiLEVE	MT-RNR2	16S	16S ribosomal RNA	3197	rs2854131	T	C	C	36121	0.00194409	0.0179251	0.913634	NA
DBP	DM	BiLEVE	MT-RNR2	16S	16S ribosomal RNA	3197	rs2854131	T	C	C	4555	-0.0261172	0.0501622	0.602632	NA
DBP	Overall	UKB	MT-RNR2	16S	16S ribosomal RNA	3197	rs2854131	T	C	C	336649	0.00291337	0.00588846	0.62077	NA
DBP	noDM	UKB	MT-RNR2	16S	16S ribosomal RNA	3197	rs2854131	T	C	C	304918	0.00466012	0.00618093	0.450879	NA
DBP	DM	UKB	MT-RNR2	16S	16S ribosomal RNA	3197	rs2854131	T	C	C	31731	-0.0158756	0.0192772	0.410205	NA
DBP	Overall	UKB	MT-ND1	ND1	NADH Dehydrogenase subunit 1	3394	rs41460449	T	C	C	336759	0.0220761	0.0141586	0.118949	NA
DBP	noDM	UKB	MT-ND1	ND1	NADH Dehydrogenase subunit 1	3394	rs41460449	T	C	C	305009	0.0298608	0.0148736	0.0446832	NA
DBP	DM	UKB	MT-ND1	ND1	NADH Dehydrogenase subunit 1	3394	rs41460449	T	C	C	31750	-0.0589144	0.0459977	0.200269	NA
DBP	Overall	BiLEVE	MT-ND1	ND1	NADH Dehydrogenase subunit 1	3480	rs28358584	A	G	G	40759	0.0282867	0.01742	0.104425	NA
DBP	noDM	BiLEVE	MT-ND1	ND1	NADH Dehydrogenase subunit 1	3480	rs28358584	A	G	G	36194	0.0285336	0.0183841	0.120651	NA
DBP	DM	BiLEVE	MT-ND1	ND1	NADH Dehydrogenase subunit 1	3480	rs28358584	A	G	G	4565	0.0338235	0.0541861	0.53252	NA
DBP	Overall	UKB	MT-ND1	ND1	NADH Dehydrogenase subunit 1	3480	rs28358584	A	G	G	337089	-0.00345862	0.00605008	0.567549	NA
DBP	noDM	UKB	MT-ND1	ND1	NADH Dehydrogenase subunit 1	3480	rs28358584	A	G	G	305316	-0.00386956	0.00634509	0.541961	NA
DBP	DM	UKB	MT-ND1	ND1	NADH Dehydrogenase subunit 1	3480	rs28358584	A	G	G	31773	-0.000183218	0.019969	0.992679	NA
DBP	Overall	UKB	MT-ND1	ND1	NADH Dehydrogenase subunit 1	3720	rs41355750	A	G	G	336765	0.0122315	0.0156443	0.434305	NA
DBP	noDM	UKB	MT-ND1	ND1	NADH Dehydrogenase subunit 1	3720	rs41355750	A	G	G	305029	0.0117574	0.0164438	0.474606	NA
DBP	DM	UKB	MT-ND1	ND1	NADH Dehydrogenase subunit 1	3720	rs41355750	A	G	G	31736	0.0144831	0.050552	0.774497	NA
DBP	Overall	BiLEVE	MT-ND1	ND1	NADH Dehydrogenase subunit 1	3796	rs28357970	A	G	G	40749	0.0627801	0.0385847	0.103729	NA
DBP	noDM	BiLEVE	MT-ND1	ND1	NADH Dehydrogenase subunit 1	3796	rs28357970	A	G	G	36184	0.0493085	0.0410923	0.230169	NA
DBP	DM	BiLEVE	MT-ND1	ND1	NADH Dehydrogenase subunit 1	3796	rs28357970	A	G	G	4565	0.138967	0.111596	0.213097	NA
DBP	Overall	UKB	MT-ND1	ND1	NADH Dehydrogenase subunit 1	3796	rs28357970	A	G	G	337037	-0.00137627	0.0135687	0.919209	NA
DBP	noDM	UKB	MT-ND1	ND1	NADH Dehydrogenase subunit 1	3796	rs28357970	A	G	G	305268	-0.00453641	0.0142328	0.749932	NA
DBP	DM	UKB	MT-ND1	ND1	NADH Dehydrogenase subunit 1	3796	rs28357970	A	G	G	31769	0.0329509	0.0447113	0.461145	NA
DBP	Overall	UKB	MT-ND1	ND1	NADH Dehydrogenase subunit 1	3915	rs41524046,COSM1138362,COSM1138363	G	A	A	337002	-0.0156755	0.0105506	0.13735	NA
DBP	noDM	UKB	MT-ND1	ND1	NADH Dehydrogenase subunit 1	3915	rs41524046,COSM1138362,COSM1138363	G	A	A	305227	-0.0148579	0.0110765	0.179794	NA
DBP	DM	UKB	MT-ND1	ND1	NADH Dehydrogenase subunit 1	3915	rs41524046,COSM1138362,COSM1138363	G	A	A	31775	-0.019703	0.0344847	0.567763	NA
DBP	Overall	BiLEVE	MT-ND1	ND1	NADH Dehydrogenase subunit 1	3992	rs879051705	C	T	T	40766	-0.000189087	0.0321763	0.995311	NA
DBP	noDM	BiLEVE	MT-ND1	ND1	NADH Dehydrogenase subunit 1	3992	rs879051705	C	T	T	36201	-0.0065787	0.0337802	0.84559	NA
DBP	DM	BiLEVE	MT-ND1	ND1	NADH Dehydrogenase subunit 1	3992	rs879051705	C	T	T	4565	0.0563359	0.104782	0.590847	NA
DBP	Overall	UKB	MT-ND1	ND1	NADH Dehydrogenase subunit 1	3992	rs879051705	C	T	T	337062	0.0223078	0.0113083	0.0485306	NA
DBP	noDM	UKB	MT-ND1	ND1	NADH Dehydrogenase subunit 1	3992	rs879051705	C	T	T	305283	0.0196132	0.0118531	0.0979877	NA
DBP	DM	UKB	MT-ND1	ND1	NADH Dehydrogenase subunit 1	3992	rs879051705	C	T	T	31779	0.0519001	0.0375328	0.166738	NA
DBP	Overall	BiLEVE	MT-ND1	ND1	NADH Dehydrogenase subunit 1	4024	-	A	G	G	40754	0.00352912	0.0348516	0.919343	NA
DBP	noDM	BiLEVE	MT-ND1	ND1	NADH Dehydrogenase subunit 1	4024	-	A	G	G	36192	-0.00237045	0.0366806	0.948474	NA
DBP	DM	BiLEVE	MT-ND1	ND1	NADH Dehydrogenase subunit 1	4024	-	A	G	G	4562	0.0400692	0.110888	0.717856	NA
DBP	Overall	UKB	MT-ND1	ND1	NADH Dehydrogenase subunit 1	4024	-	A	G	G	337147	0.0280669	0.0122781	0.0222594	NA
DBP	noDM	UKB	MT-ND1	ND1	NADH Dehydrogenase subunit 1	4024	-	A	G	G	305373	0.0288919	0.0128699	0.0247739	NA
DBP	DM	UKB	MT-ND1	ND1	NADH Dehydrogenase subunit 1	4024	-	A	G	G	31774	0.024324	0.0407469	0.550542	NA
DBP	Overall	BiLEVE	MT-ND1	ND1	NADH Dehydrogenase subunit 1	4216	COSM1138370,COSM1138371	T	C	C	40709	-0.0133794	0.0118714	0.259734	NA
DBP	noDM	BiLEVE	MT-ND1	ND1	NADH Dehydrogenase subunit 1	4216	COSM1138370,COSM1138371	T	C	C	36152	-0.0116138	0.0125876	0.356203	NA
DBP	DM	BiLEVE	MT-ND1	ND1	NADH Dehydrogenase subunit 1	4216	COSM1138370,COSM1138371	T	C	C	4557	-0.023925	0.0355256	0.500689	NA
DBP	Overall	UKB	MT-ND1	ND1	NADH Dehydrogenase subunit 1	4216	COSM1138370,COSM1138371	T	C	C	336881	0.000461484	0.00415075	0.911473	NA
DBP	noDM	UKB	MT-ND1	ND1	NADH Dehydrogenase subunit 1	4216	COSM1138370,COSM1138371	T	C	C	305127	0.0027657	0.00435718	0.525595	NA
DBP	DM	UKB	MT-ND1	ND1	NADH Dehydrogenase subunit 1	4216	COSM1138370,COSM1138371	T	C	C	31754	-0.0212822	0.0135794	0.117067	NA
DBP	Overall	BiLEVE	MT-TQ	Q	tRNA glutamine	4336	rs41456348	T	C	C	40707	0.0210525	0.0321223	0.512223	NA
DBP	noDM	BiLEVE	MT-TQ	Q	tRNA glutamine	4336	rs41456348	T	C	C	36141	0.0329631	0.0339897	0.332154	NA
DBP	DM	BiLEVE	MT-TQ	Q	tRNA glutamine	4336	rs41456348	T	C	C	4566	-0.0459644	0.0976747	0.637958	NA
DBP	Overall	UKB	MT-TQ	Q	tRNA glutamine	4336	rs41456348	T	C	C	337035	0.0203125	0.011003	0.0648793	NA
DBP	noDM	UKB	MT-TQ	Q	tRNA glutamine	4336	rs41456348	T	C	C	305272	0.0213943	0.0115522	0.0640319	NA
DBP	DM	UKB	MT-TQ	Q	tRNA glutamine	4336	rs41456348	T	C	C	31763	0.00696347	0.0359365	0.846356	NA
DBP	Overall	UKB	MT-ND2	ND2	NADH dehydrogenase subunit 2	4529	-	A	T	T	337246	-0.0160929	0.00963133	0.0947436	NA
DBP	noDM	UKB	MT-ND2	ND2	NADH dehydrogenase subunit 2	4529	-	A	T	T	305454	-0.010849	0.0101157	0.283499	NA
DBP	DM	UKB	MT-ND2	ND2	NADH dehydrogenase subunit 2	4529	-	A	T	T	31792	-0.0628627	0.0313487	0.0449421	NA
DBP	Overall	BiLEVE	MT-ND2	ND2	NADH dehydrogenase subunit 2	4561	-	T	C	C	40768	-0.0249539	0.0441983	0.572356	NA
DBP	noDM	BiLEVE	MT-ND2	ND2	NADH dehydrogenase subunit 2	4561	-	T	C	C	36204	-0.0282963	0.0465244	0.543057	NA
DBP	DM	BiLEVE	MT-ND2	ND2	NADH dehydrogenase subunit 2	4561	-	T	C	C	4564	0.0331778	0.140464	0.813287	NA
DBP	Overall	UKB	MT-ND2	ND2	NADH dehydrogenase subunit 2	4561	-	T	C	C	337089	0.0243582	0.0153613	0.112812	NA
DBP	noDM	UKB	MT-ND2	ND2	NADH dehydrogenase subunit 2	4561	-	T	C	C	305316	0.026263	0.0161301	0.103485	NA
DBP	DM	UKB	MT-ND2	ND2	NADH dehydrogenase subunit 2	4561	-	T	C	C	31773	0.00475091	0.0501073	0.924463	NA
DBP	Overall	BiLEVE	MT-ND2	ND2	NADH dehydrogenase subunit 2	4580	-	G	A	A	40657	-0.013193	0.0272888	0.628774	NA
DBP	noDM	BiLEVE	MT-ND2	ND2	NADH dehydrogenase subunit 2	4580	-	G	A	A	36108	-0.00715351	0.0290429	0.805445	NA
DBP	DM	BiLEVE	MT-ND2	ND2	NADH dehydrogenase subunit 2	4580	-	G	A	A	4549	-0.0551449	0.0792312	0.486465	NA
DBP	Overall	UKB	MT-ND2	ND2	NADH dehydrogenase subunit 2	4580	-	G	A	A	336237	-0.00757912	0.00940951	0.420547	NA
DBP	noDM	UKB	MT-ND2	ND2	NADH dehydrogenase subunit 2	4580	-	G	A	A	304549	-0.0121514	0.00988767	0.219095	NA
DBP	DM	UKB	MT-ND2	ND2	NADH dehydrogenase subunit 2	4580	-	G	A	A	31688	0.0403822	0.0304828	0.185262	NA
DBP	Overall	BiLEVE	MT-ND2	ND2	NADH dehydrogenase subunit 2	4646	rs375312364	T	C	C	40778	-0.00791312	0.0327191	0.808898	NA
DBP	noDM	BiLEVE	MT-ND2	ND2	NADH dehydrogenase subunit 2	4646	rs375312364	T	C	C	36212	0.0127715	0.0346201	0.712201	NA
DBP	DM	BiLEVE	MT-ND2	ND2	NADH dehydrogenase subunit 2	4646	rs375312364	T	C	C	4566	-0.158458	0.0994003	0.110975	NA
DBP	Overall	BiLEVE	MT-ND2	ND2	NADH dehydrogenase subunit 2	4769	rs3021086	G	A	A	40725	0.00965689	0.0312476	0.757289	NA
DBP	noDM	BiLEVE	MT-ND2	ND2	NADH dehydrogenase subunit 2	4769	rs3021086	G	A	A	36166	0.0132768	0.0331857	0.689104	NA
DBP	DM	BiLEVE	MT-ND2	ND2	NADH dehydrogenase subunit 2	4769	rs3021086	G	A	A	4559	-0.00700719	0.092232	0.939444	NA
DBP	Overall	UKB	MT-ND2	ND2	NADH dehydrogenase subunit 2	4769	rs3021086	G	A	A	337055	-0.00515459	0.0107651	0.632065	NA
DBP	noDM	UKB	MT-ND2	ND2	NADH dehydrogenase subunit 2	4769	rs3021086	G	A	A	305285	-0.00323708	0.0113238	0.774982	NA
DBP	DM	UKB	MT-ND2	ND2	NADH dehydrogenase subunit 2	4769	rs3021086	G	A	A	31770	-0.0311272	0.034549	0.367618	NA
DBP	Overall	BiLEVE	MT-ND2	ND2	NADH dehydrogenase subunit 2	4793	-	A	G	G	40741	-0.00972268	0.0424272	0.818745	NA
DBP	noDM	BiLEVE	MT-ND2	ND2	NADH dehydrogenase subunit 2	4793	-	A	G	G	36180	-0.00484096	0.0446398	0.913643	NA
DBP	DM	BiLEVE	MT-ND2	ND2	NADH dehydrogenase subunit 2	4793	-	A	G	G	4561	-0.0622424	0.135313	0.645547	NA
DBP	Overall	UKB	MT-ND2	ND2	NADH dehydrogenase subunit 2	4793	-	A	G	G	337059	-0.00133168	0.0146166	0.927407	NA
DBP	noDM	UKB	MT-ND2	ND2	NADH dehydrogenase subunit 2	4793	-	A	G	G	305283	-0.00640872	0.0153443	0.676195	NA
DBP	DM	UKB	MT-ND2	ND2	NADH dehydrogenase subunit 2	4793	-	A	G	G	31776	0.048223	0.0477958	0.313012	NA
DBP	Overall	BiLEVE	MT-ND2	ND2	NADH dehydrogenase subunit 2	4917	rs28357980	A	G	G	40714	0.029702	0.0163231	0.0688234	NA
DBP	noDM	BiLEVE	MT-ND2	ND2	NADH dehydrogenase subunit 2	4917	rs28357980	A	G	G	36153	0.0302096	0.0173185	0.0811061	NA
DBP	DM	BiLEVE	MT-ND2	ND2	NADH dehydrogenase subunit 2	4917	rs28357980	A	G	G	4561	0.030504	0.048606	0.530314	NA
DBP	Overall	UKB	MT-ND2	ND2	NADH dehydrogenase subunit 2	4917	rs28357980	A	G	G	336831	0.00222829	0.00568233	0.694953	NA
DBP	noDM	UKB	MT-ND2	ND2	NADH dehydrogenase subunit 2	4917	rs28357980	A	G	G	305078	0.00515673	0.00596247	0.387114	NA
DBP	DM	UKB	MT-ND2	ND2	NADH dehydrogenase subunit 2	4917	rs28357980	A	G	G	31753	-0.0263696	0.0186624	0.15767	NA
DBP	Overall	BiLEVE	MT-ND2	ND2	NADH dehydrogenase subunit 2	5004	-	T	C	C	40756	0.00169923	0.0337362	0.959829	NA
DBP	noDM	BiLEVE	MT-ND2	ND2	NADH dehydrogenase subunit 2	5004	-	T	C	C	36192	-0.00227639	0.0355375	0.948926	NA
DBP	DM	BiLEVE	MT-ND2	ND2	NADH dehydrogenase subunit 2	5004	-	T	C	C	4564	0.0202866	0.106536	0.848988	NA
DBP	Overall	UKB	MT-ND2	ND2	NADH dehydrogenase subunit 2	5004	-	T	C	C	337121	0.0259385	0.0119061	0.0293621	NA
DBP	noDM	UKB	MT-ND2	ND2	NADH dehydrogenase subunit 2	5004	-	T	C	C	305337	0.0252664	0.0124828	0.0429611	NA
DBP	DM	UKB	MT-ND2	ND2	NADH dehydrogenase subunit 2	5004	-	T	C	C	31784	0.0362413	0.0394218	0.357934	NA
DBP	Overall	UKB	MT-ND2	ND2	NADH dehydrogenase subunit 2	5046	rs878927053	G	A	A	336643	-0.00481498	0.0121686	0.692335	NA
DBP	noDM	UKB	MT-ND2	ND2	NADH dehydrogenase subunit 2	5046	rs878927053	G	A	A	304904	0.00159795	0.012765	0.90038	NA
DBP	DM	UKB	MT-ND2	ND2	NADH dehydrogenase subunit 2	5046	rs878927053	G	A	A	31739	-0.0711522	0.040075	0.0758288	NA
DBP	Overall	BiLEVE	MT-ND2	ND2	NADH dehydrogenase subunit 2	5147	rs367778601	G	A	A	40728	0.0333992	0.0206954	0.106568	NA
DBP	noDM	BiLEVE	MT-ND2	ND2	NADH dehydrogenase subunit 2	5147	rs367778601	G	A	A	36168	0.0366795	0.0218851	0.093747	NA
DBP	DM	BiLEVE	MT-ND2	ND2	NADH dehydrogenase subunit 2	5147	rs367778601	G	A	A	4560	0.0113974	0.0633175	0.857157	NA
DBP	Overall	UKB	MT-ND2	ND2	NADH dehydrogenase subunit 2	5147	rs367778601	G	A	A	337055	0.0124741	0.00727432	0.086379	NA
DBP	noDM	UKB	MT-ND2	ND2	NADH dehydrogenase subunit 2	5147	rs367778601	G	A	A	305290	0.0150659	0.00763087	0.048345	NA
DBP	DM	UKB	MT-ND2	ND2	NADH dehydrogenase subunit 2	5147	rs367778601	G	A	A	31765	-0.0143854	0.0239546	0.548159	NA
DBP	Overall	UKB	MT-ND2	ND2	NADH dehydrogenase subunit 2	5390	rs41333444	A	G	G	337206	0.01014	0.0158234	0.521637	NA
DBP	noDM	UKB	MT-ND2	ND2	NADH dehydrogenase subunit 2	5390	rs41333444	A	G	G	305425	0.00971777	0.0166411	0.559247	NA
DBP	DM	UKB	MT-ND2	ND2	NADH dehydrogenase subunit 2	5390	rs41333444	A	G	G	31781	0.014524	0.0508702	0.775254	NA
DBP	Overall	UKB	MT-ND2	ND2	NADH dehydrogenase subunit 2	5495	rs3020602	T	C	C	336838	-0.0215921	0.0134664	0.108846	NA
DBP	noDM	UKB	MT-ND2	ND2	NADH dehydrogenase subunit 2	5495	rs3020602	T	C	C	305084	-0.0128734	0.0140865	0.360779	NA
DBP	DM	UKB	MT-ND2	ND2	NADH dehydrogenase subunit 2	5495	rs3020602	T	C	C	31754	-0.112136	0.0456218	0.0139789	NA
DBP	Overall	BiLEVE	MT-NC4	NC4	non-coding nucleotides	5656	-	A	G	G	40761	0.0113052	0.0428643	0.791978	NA
DBP	noDM	BiLEVE	MT-NC4	NC4	non-coding nucleotides	5656	-	A	G	G	36198	0.0378316	0.0454791	0.405501	NA
DBP	DM	BiLEVE	MT-NC4	NC4	non-coding nucleotides	5656	-	A	G	G	4563	-0.169122	0.127428	0.18451	NA
DBP	Overall	UKB	MT-NC4	NC4	non-coding nucleotides	5656	-	A	G	G	337136	-0.0230423	0.0152502	0.130801	NA
DBP	noDM	UKB	MT-NC4	NC4	non-coding nucleotides	5656	-	A	G	G	305352	-0.0230971	0.016116	0.151808	NA
DBP	DM	UKB	MT-NC4	NC4	non-coding nucleotides	5656	-	A	G	G	31784	-0.0236128	0.0469982	0.615375	NA
DBP	Overall	UKB	MT-CO1	COI	Cytochrome c oxidase subunit I	5999	rs879118820	T	C	C	336977	-0.0100294	0.0119632	0.401832	NA
DBP	noDM	UKB	MT-CO1	COI	Cytochrome c oxidase subunit I	5999	rs879118820	T	C	C	305211	-0.0136144	0.0125705	0.27879	NA
DBP	DM	UKB	MT-CO1	COI	Cytochrome c oxidase subunit I	5999	rs879118820	T	C	C	31766	0.0240545	0.0387804	0.535082	NA
DBP	Overall	UKB	MT-CO1	COI	Cytochrome c oxidase subunit I	6047	rs879104796	A	G	G	337126	-0.00958227	0.0119323	0.421944	NA
DBP	noDM	UKB	MT-CO1	COI	Cytochrome c oxidase subunit I	6047	rs879104796	A	G	G	305353	-0.0131626	0.0125307	0.293522	NA
DBP	DM	UKB	MT-CO1	COI	Cytochrome c oxidase subunit I	6047	rs879104796	A	G	G	31773	0.0232082	0.0388904	0.550672	NA
DBP	Overall	UKB	MT-CO1	COI	Cytochrome c oxidase subunit I	6221	rs370472320	T	C	C	336979	-0.0136397	0.0138463	0.324587	NA
DBP	noDM	UKB	MT-CO1	COI	Cytochrome c oxidase subunit I	6221	rs370472320	T	C	C	305216	-0.0192994	0.0144906	0.18291	NA
DBP	DM	UKB	MT-CO1	COI	Cytochrome c oxidase subunit I	6221	rs370472320	T	C	C	31763	0.0485973	0.0466952	0.298006	NA
DBP	Overall	BiLEVE	MT-CO1	COI	Cytochrome c oxidase subunit I	6371	rs878870695	C	T	T	40726	-0.0124501	0.0416926	0.765234	NA
DBP	noDM	BiLEVE	MT-CO1	COI	Cytochrome c oxidase subunit I	6371	rs878870695	C	T	T	36164	0.000100184	0.0436587	0.998169	NA
DBP	DM	BiLEVE	MT-CO1	COI	Cytochrome c oxidase subunit I	6371	rs878870695	C	T	T	4562	-0.1193	0.139218	0.391528	NA
DBP	Overall	UKB	MT-CO1	COI	Cytochrome c oxidase subunit I	6371	rs878870695	C	T	T	336760	-0.0169053	0.0144388	0.24167	NA
DBP	noDM	UKB	MT-CO1	COI	Cytochrome c oxidase subunit I	6371	rs878870695	C	T	T	305016	-0.0200366	0.0151038	0.184645	NA
DBP	DM	UKB	MT-CO1	COI	Cytochrome c oxidase subunit I	6371	rs878870695	C	T	T	31744	0.0235407	0.0489203	0.630374	NA
DBP	Overall	BiLEVE	MT-CO1	COI	Cytochrome c oxidase subunit I	6734	-	G	A	A	40619	-0.000541619	0.0483046	0.991054	NA
DBP	noDM	BiLEVE	MT-CO1	COI	Cytochrome c oxidase subunit I	6734	-	G	A	A	36072	-0.00706719	0.051519	0.890892	NA
DBP	DM	BiLEVE	MT-CO1	COI	Cytochrome c oxidase subunit I	6734	-	G	A	A	4547	0.0389057	0.138347	0.778556	NA
DBP	Overall	UKB	MT-CO1	COI	Cytochrome c oxidase subunit I	6734	-	G	A	A	336367	-0.0156896	0.016583	0.344085	NA
DBP	noDM	UKB	MT-CO1	COI	Cytochrome c oxidase subunit I	6734	-	G	A	A	304675	-0.00950379	0.0174615	0.586255	NA
DBP	DM	UKB	MT-CO1	COI	Cytochrome c oxidase subunit I	6734	-	G	A	A	31692	-0.0670209	0.0527217	0.20366	NA
DBP	Overall	BiLEVE	MT-CO1	COI	Cytochrome c oxidase subunit I	6776	-	T	C	C	40746	-0.0322302	0.0217663	0.138684	NA
DBP	noDM	BiLEVE	MT-CO1	COI	Cytochrome c oxidase subunit I	6776	-	T	C	C	36183	-0.0423521	0.0230681	0.0663723	NA
DBP	DM	BiLEVE	MT-CO1	COI	Cytochrome c oxidase subunit I	6776	-	T	C	C	4563	0.0416883	0.0652942	0.523201	NA
DBP	Overall	UKB	MT-CO1	COI	Cytochrome c oxidase subunit I	6776	-	T	C	C	336919	-0.00708823	0.00755685	0.348252	NA
DBP	noDM	UKB	MT-CO1	COI	Cytochrome c oxidase subunit I	6776	-	T	C	C	305157	-0.00702453	0.00793687	0.37613	NA
DBP	DM	UKB	MT-CO1	COI	Cytochrome c oxidase subunit I	6776	-	T	C	C	31762	-0.0116969	0.0245972	0.634407	NA
DBP	Overall	BiLEVE	MT-CO1	COI	Cytochrome c oxidase subunit I	7028	-	T	C	C	40749	0.00137302	0.00983398	0.888961	NA
DBP	noDM	BiLEVE	MT-CO1	COI	Cytochrome c oxidase subunit I	7028	-	T	C	C	36188	-0.0038678	0.0104235	0.710591	NA
DBP	DM	BiLEVE	MT-CO1	COI	Cytochrome c oxidase subunit I	7028	-	T	C	C	4561	0.038288	0.0294909	0.19425	NA
DBP	Overall	UKB	MT-CO1	COI	Cytochrome c oxidase subunit I	7028	-	T	C	C	336980	0.00317406	0.00341902	0.353224	NA
DBP	noDM	UKB	MT-CO1	COI	Cytochrome c oxidase subunit I	7028	-	T	C	C	305211	0.00164395	0.00358838	0.646859	NA
DBP	DM	UKB	MT-CO1	COI	Cytochrome c oxidase subunit I	7028	-	T	C	C	31769	0.01689	0.0112064	0.131776	NA
DBP	Overall	BiLEVE	MT-TS1	S(UCN)	tRNA serine 1	7476	rs201950015	C	T	T	40762	0.0399952	0.0351878	0.255703	NA
DBP	noDM	BiLEVE	MT-TS1	S(UCN)	tRNA serine 1	7476	rs201950015	C	T	T	36196	0.0364774	0.0373847	0.329204	NA
DBP	DM	BiLEVE	MT-TS1	S(UCN)	tRNA serine 1	7476	rs201950015	C	T	T	4566	0.0478929	0.103575	0.643817	NA
DBP	Overall	UKB	MT-TS1	S(UCN)	tRNA serine 1	7476	rs201950015	C	T	T	337208	-0.00898844	0.0125921	0.475342	NA
DBP	noDM	UKB	MT-TS1	S(UCN)	tRNA serine 1	7476	rs201950015	C	T	T	305424	-0.0106954	0.0132002	0.417801	NA
DBP	DM	UKB	MT-TS1	S(UCN)	tRNA serine 1	7476	rs201950015	C	T	T	31784	0.0130839	0.0417487	0.753982	NA
DBP	Overall	BiLEVE	MT-CO2	COII	Cytochrome c oxidase subunit II	7768	rs41534044	A	G	G	40773	0.018149	0.0242889	0.454938	NA
DBP	noDM	BiLEVE	MT-CO2	COII	Cytochrome c oxidase subunit II	7768	rs41534044	A	G	G	36207	0.0203506	0.0257566	0.429466	NA
DBP	DM	BiLEVE	MT-CO2	COII	Cytochrome c oxidase subunit II	7768	rs41534044	A	G	G	4566	-0.00302323	0.072508	0.966744	NA
DBP	Overall	UKB	MT-CO2	COII	Cytochrome c oxidase subunit II	7768	rs41534044	A	G	G	337205	-0.00343543	0.00851872	0.686742	NA
DBP	noDM	UKB	MT-CO2	COII	Cytochrome c oxidase subunit II	7768	rs41534044	A	G	G	305419	-0.00451068	0.00895565	0.614494	NA
DBP	DM	UKB	MT-CO2	COII	Cytochrome c oxidase subunit II	7768	rs41534044	A	G	G	31786	0.00461819	0.0274805	0.866542	NA
DBP	Overall	BiLEVE	MT-CO2	COII	Cytochrome c oxidase subunit II	8251	rs3021089	G	A	A	40744	-0.00648033	0.0210425	0.758111	NA
DBP	noDM	BiLEVE	MT-CO2	COII	Cytochrome c oxidase subunit II	8251	rs3021089	G	A	A	36179	-0.00479647	0.0222946	0.829659	NA
DBP	DM	BiLEVE	MT-CO2	COII	Cytochrome c oxidase subunit II	8251	rs3021089	G	A	A	4565	-0.0165978	0.0632697	0.793076	NA
DBP	Overall	BiLEVE	MT-CO2	COII	Cytochrome c oxidase subunit II	8269	-	G	A	A	40735	-0.0367143	0.0270541	0.174767	NA
DBP	noDM	BiLEVE	MT-CO2	COII	Cytochrome c oxidase subunit II	8269	-	G	A	A	36173	-0.0338421	0.0286462	0.23746	NA
DBP	DM	BiLEVE	MT-CO2	COII	Cytochrome c oxidase subunit II	8269	-	G	A	A	4562	-0.0745669	0.0817429	0.361706	NA
DBP	Overall	UKB	MT-CO2	COII	Cytochrome c oxidase subunit II	8269	-	G	A	A	336588	0.0207854	0.00957394	0.0299288	NA
DBP	noDM	UKB	MT-CO2	COII	Cytochrome c oxidase subunit II	8269	-	G	A	A	304866	0.0209086	0.0100362	0.0372228	NA
DBP	DM	UKB	MT-CO2	COII	Cytochrome c oxidase subunit II	8269	-	G	A	A	31722	0.0274354	0.0317531	0.387582	NA
DBP	Overall	UKB	MT-ATP8	ATPase8	ATP synthase F0 subunit 8	8448	rs879056797	T	C	C	337253	0.00471198	0.0152684	0.757619	NA
DBP	noDM	UKB	MT-ATP8	ATPase8	ATP synthase F0 subunit 8	8448	rs879056797	T	C	C	305462	0.00195976	0.0159935	0.902476	NA
DBP	DM	UKB	MT-ATP8	ATPase8	ATP synthase F0 subunit 8	8448	rs879056797	T	C	C	31791	0.0274785	0.0510154	0.590145	NA
DBP	Overall	BiLEVE	MT-ATP6	ATPase6	ATP synthase F0 subunit 6	8697	rs879233543	G	A	A	40712	0.0250747	0.0162983	0.123938	NA
DBP	noDM	BiLEVE	MT-ATP6	ATPase6	ATP synthase F0 subunit 6	8697	rs879233543	G	A	A	36153	0.0262184	0.0172933	0.129502	NA
DBP	DM	BiLEVE	MT-ATP6	ATPase6	ATP synthase F0 subunit 6	8697	rs879233543	G	A	A	4559	0.0215472	0.0485086	0.656924	NA
DBP	Overall	UKB	MT-ATP6	ATPase6	ATP synthase F0 subunit 6	8697	rs879233543	G	A	A	336882	0.00422275	0.00567716	0.45699	NA
DBP	noDM	UKB	MT-ATP6	ATPase6	ATP synthase F0 subunit 6	8697	rs879233543	G	A	A	305130	0.00721036	0.00595741	0.226158	NA
DBP	DM	UKB	MT-ATP6	ATPase6	ATP synthase F0 subunit 6	8697	rs879233543	G	A	A	31752	-0.0250343	0.0186358	0.179168	NA
DBP	Overall	BiLEVE	MT-ATP6	ATPase6	ATP synthase F0 subunit 6	8994	rs28358887,COSM6716156,COSM6716157	G	A	A	40597	-0.00280817	0.0332394	0.932673	NA
DBP	noDM	BiLEVE	MT-ATP6	ATPase6	ATP synthase F0 subunit 6	8994	rs28358887,COSM6716156,COSM6716157	G	A	A	36051	0.0137337	0.0356349	0.699944	NA
DBP	DM	BiLEVE	MT-ATP6	ATPase6	ATP synthase F0 subunit 6	8994	rs28358887,COSM6716156,COSM6716157	G	A	A	4546	-0.122172	0.0917406	0.183023	NA
DBP	Overall	UKB	MT-ATP6	ATPase6	ATP synthase F0 subunit 6	8994	rs28358887,COSM6716156,COSM6716157	G	A	A	337198	-0.00357361	0.0114226	0.754391	NA
DBP	noDM	UKB	MT-ATP6	ATPase6	ATP synthase F0 subunit 6	8994	rs28358887,COSM6716156,COSM6716157	G	A	A	305419	0.00375554	0.0119873	0.754058	NA
DBP	DM	UKB	MT-ATP6	ATPase6	ATP synthase F0 subunit 6	8994	rs28358887,COSM6716156,COSM6716157	G	A	A	31779	-0.0762518	0.0374709	0.041863	NA
DBP	Overall	BiLEVE	MT-ATP6	ATPase6	ATP synthase F0 subunit 6	9055	rs193303045	G	A	A	40731	0.0251591	0.0170414	0.139858	NA
DBP	noDM	BiLEVE	MT-ATP6	ATPase6	ATP synthase F0 subunit 6	9055	rs193303045	G	A	A	36169	0.0272445	0.0179952	0.130039	NA
DBP	DM	BiLEVE	MT-ATP6	ATPase6	ATP synthase F0 subunit 6	9055	rs193303045	G	A	A	4562	0.0172767	0.0527357	0.743223	NA
DBP	Overall	UKB	MT-ATP6	ATPase6	ATP synthase F0 subunit 6	9055	rs193303045	G	A	A	336625	-0.00331386	0.00592882	0.576202	NA
DBP	noDM	UKB	MT-ATP6	ATPase6	ATP synthase F0 subunit 6	9055	rs193303045	G	A	A	304906	-0.00363985	0.00621748	0.558264	NA
DBP	DM	UKB	MT-ATP6	ATPase6	ATP synthase F0 subunit 6	9055	rs193303045	G	A	A	31719	-0.00150218	0.0195836	0.938858	NA
DBP	Overall	UKB	MT-ATP6	ATPase6	ATP synthase F0 subunit 6	9123	COSM1155692,COSM1155693	G	A	A	336993	0.0236049	0.0121235	0.0515321	NA
DBP	noDM	UKB	MT-ATP6	ATPase6	ATP synthase F0 subunit 6	9123	COSM1155692,COSM1155693	G	A	A	305223	0.0234179	0.012708	0.0653632	NA
DBP	DM	UKB	MT-ATP6	ATPase6	ATP synthase F0 subunit 6	9123	COSM1155692,COSM1155693	G	A	A	31770	0.0283422	0.0402302	0.481127	NA
DBP	Overall	BiLEVE	MT-CO3	COIII	Cytochrome c oxidase subunit III	9477	rs2853825	G	A	A	40751	0.00204818	0.0168503	0.903255	NA
DBP	noDM	BiLEVE	MT-CO3	COIII	Cytochrome c oxidase subunit III	9477	rs2853825	G	A	A	36189	0.00165073	0.0178868	0.92647	NA
DBP	DM	BiLEVE	MT-CO3	COIII	Cytochrome c oxidase subunit III	9477	rs2853825	G	A	A	4562	0.000181806	0.0498966	0.997093	NA
DBP	Overall	UKB	MT-CO3	COIII	Cytochrome c oxidase subunit III	9667	rs41482146	A	G	G	336964	0.0286313	0.0152328	0.060166	NA
DBP	noDM	UKB	MT-CO3	COIII	Cytochrome c oxidase subunit III	9667	rs41482146	A	G	G	305193	0.0312076	0.0159916	0.0509985	NA
DBP	DM	UKB	MT-CO3	COIII	Cytochrome c oxidase subunit III	9667	rs41482146	A	G	G	31771	0.000606941	0.0498025	0.990277	NA
DBP	Overall	BiLEVE	MT-CO3	COIII	Cytochrome c oxidase subunit III	9698	-	T	C	C	40638	0.0269528	0.0175005	0.123539	NA
DBP	noDM	BiLEVE	MT-CO3	COIII	Cytochrome c oxidase subunit III	9698	-	T	C	C	36087	0.0265057	0.0184587	0.151025	NA
DBP	DM	BiLEVE	MT-CO3	COIII	Cytochrome c oxidase subunit III	9698	-	T	C	C	4551	0.0362661	0.0546678	0.507115	NA
DBP	Overall	UKB	MT-CO3	COIII	Cytochrome c oxidase subunit III	9698	-	T	C	C	336220	-0.00171599	0.00606334	0.777169	NA
DBP	noDM	UKB	MT-CO3	COIII	Cytochrome c oxidase subunit III	9698	-	T	C	C	304542	-0.00219325	0.00635798	0.730125	NA
DBP	DM	UKB	MT-CO3	COIII	Cytochrome c oxidase subunit III	9698	-	T	C	C	31678	0.00238235	0.0200446	0.905393	NA
DBP	Overall	BiLEVE	MT-CO3	COIII	Cytochrome c oxidase subunit III	9716	rs41502750	T	C	C	40770	-0.02849	0.0393041	0.468541	NA
DBP	noDM	BiLEVE	MT-CO3	COIII	Cytochrome c oxidase subunit III	9716	rs41502750	T	C	C	36203	-0.0444684	0.0416088	0.2852	NA
DBP	DM	BiLEVE	MT-CO3	COIII	Cytochrome c oxidase subunit III	9716	rs41502750	T	C	C	4567	0.14006	0.119009	0.239303	NA
DBP	Overall	UKB	MT-CO3	COIII	Cytochrome c oxidase subunit III	9716	rs41502750	T	C	C	337180	0.00780883	0.0136788	0.568088	NA
DBP	noDM	UKB	MT-CO3	COIII	Cytochrome c oxidase subunit III	9716	rs41502750	T	C	C	305397	0.0116345	0.0143649	0.417986	NA
DBP	DM	UKB	MT-CO3	COIII	Cytochrome c oxidase subunit III	9716	rs41502750	T	C	C	31783	-0.0327968	0.0445761	0.461889	NA
DBP	Overall	UKB	MT-CO3	COIII	Cytochrome c oxidase subunit III	9899	rs41345446	T	C	C	337118	-0.0191872	0.012886	0.13649	NA
DBP	noDM	UKB	MT-CO3	COIII	Cytochrome c oxidase subunit III	9899	rs41345446	T	C	C	305346	-0.0160645	0.0135338	0.235234	NA
DBP	DM	UKB	MT-CO3	COIII	Cytochrome c oxidase subunit III	9899	rs41345446	T	C	C	31772	-0.0518022	0.0419555	0.216953	NA
DBP	Overall	BiLEVE	MT-ND3	ND3	NADH dehydrogenase subunit 3	10238	-	T	C	C	40652	-0.00165577	0.0267147	0.950579	NA
DBP	noDM	BiLEVE	MT-ND3	ND3	NADH dehydrogenase subunit 3	10238	-	T	C	C	36104	-0.000943146	0.0281616	0.973284	NA
DBP	DM	BiLEVE	MT-ND3	ND3	NADH dehydrogenase subunit 3	10238	-	T	C	C	4548	0.0074526	0.083816	0.929152	NA
DBP	Overall	UKB	MT-ND3	ND3	NADH dehydrogenase subunit 3	10238	-	T	C	C	336710	-0.0125873	0.00926851	0.174442	NA
DBP	noDM	UKB	MT-ND3	ND3	NADH dehydrogenase subunit 3	10238	-	T	C	C	304965	-0.0078654	0.00972858	0.418813	NA
DBP	DM	UKB	MT-ND3	ND3	NADH dehydrogenase subunit 3	10238	-	T	C	C	31745	-0.0561294	0.0303471	0.0643835	NA
DBP	Overall	BiLEVE	MT-ND3	ND3	NADH dehydrogenase subunit 3	10398	rs2853826	A	G	G	40608	-0.0125585	0.0119582	0.29363	NA
DBP	noDM	BiLEVE	MT-ND3	ND3	NADH dehydrogenase subunit 3	10398	rs2853826	A	G	G	36065	-0.00802736	0.0126462	0.525586	NA
DBP	DM	BiLEVE	MT-ND3	ND3	NADH dehydrogenase subunit 3	10398	rs2853826	A	G	G	4543	-0.0438753	0.0365255	0.229727	NA
DBP	Overall	UKB	MT-ND3	ND3	NADH dehydrogenase subunit 3	10398	rs2853826	A	G	G	335758	-0.00583613	0.00417852	0.162505	NA
DBP	noDM	UKB	MT-ND3	ND3	NADH dehydrogenase subunit 3	10398	rs2853826	A	G	G	304119	-0.0052539	0.00438525	0.230886	NA
DBP	DM	UKB	MT-ND3	ND3	NADH dehydrogenase subunit 3	10398	rs2853826	A	G	G	31639	-0.0101994	0.0137043	0.456732	NA
DBP	Overall	UKB	MT-ND3	ND3	NADH dehydrogenase subunit 3	10400	rs28358278	C	T	T	337105	0.0372385	0.0433636	0.390479	NA
DBP	noDM	UKB	MT-ND3	ND3	NADH dehydrogenase subunit 3	10400	rs28358278	C	T	T	305324	0.0279495	0.0454778	0.538836	NA
DBP	DM	UKB	MT-ND3	ND3	NADH dehydrogenase subunit 3	10400	rs28358278	C	T	T	31781	0.127647	0.14315	0.372559	NA
DBP	Overall	BiLEVE	MT-TR	R	tRNA arginine	10463	rs28358279	T	C	C	40659	0.0144941	0.0158064	0.359161	NA
DBP	noDM	BiLEVE	MT-TR	R	tRNA arginine	10463	rs28358279	T	C	C	36102	0.0143665	0.0167538	0.391172	NA
DBP	DM	BiLEVE	MT-TR	R	tRNA arginine	10463	rs28358279	T	C	C	4557	0.0184665	0.0474058	0.696894	NA
DBP	Overall	UKB	MT-TR	R	tRNA arginine	10463	rs28358279	T	C	C	336365	0.00600279	0.00552275	0.277073	NA
DBP	noDM	UKB	MT-TR	R	tRNA arginine	10463	rs28358279	T	C	C	304649	0.00908795	0.00579548	0.116856	NA
DBP	DM	UKB	MT-TR	R	tRNA arginine	10463	rs28358279	T	C	C	31716	-0.0238155	0.018126	0.188895	NA
DBP	Overall	BiLEVE	MT-ND4L	ND4L	NADH dehydrogenase subunit 4L	10550	rs28358280	A	G	G	40762	0.0302518	0.0174501	0.0829937	NA
DBP	noDM	BiLEVE	MT-ND4L	ND4L	NADH dehydrogenase subunit 4L	10550	rs28358280	A	G	G	36196	0.0308223	0.0184138	0.0941647	NA
DBP	DM	BiLEVE	MT-ND4L	ND4L	NADH dehydrogenase subunit 4L	10550	rs28358280	A	G	G	4566	0.0333525	0.0543241	0.539277	NA
DBP	Overall	UKB	MT-ND4L	ND4L	NADH dehydrogenase subunit 4L	10550	rs28358280	A	G	G	337160	-0.0033809	0.00606453	0.577195	NA
DBP	noDM	UKB	MT-ND4L	ND4L	NADH dehydrogenase subunit 4L	10550	rs28358280	A	G	G	305390	-0.0037649	0.00635975	0.553858	NA
DBP	DM	UKB	MT-ND4L	ND4L	NADH dehydrogenase subunit 4L	10550	rs28358280	A	G	G	31770	-0.000569999	0.0200322	0.9773	NA
DBP	Overall	UKB	MT-ND4	ND4	NADH dehydrogenase subunit 4	10819	rs28358283	A	G	G	337146	-0.00800483	0.0197916	0.685877	NA
DBP	noDM	UKB	MT-ND4	ND4	NADH dehydrogenase subunit 4	10819	rs28358283	A	G	G	305355	-0.00431126	0.0207623	0.835504	NA
DBP	DM	UKB	MT-ND4	ND4	NADH dehydrogenase subunit 4	10819	rs28358283	A	G	G	31791	-0.0408227	0.0651583	0.530981	NA
DBP	Overall	UKB	MT-ND4	ND4	NADH dehydrogenase subunit 4	10873	rs2857284	T	C	C	336960	0.00226837	0.0274612	0.934167	NA
DBP	noDM	UKB	MT-ND4	ND4	NADH dehydrogenase subunit 4	10873	rs2857284	T	C	C	305193	0.00378244	0.0288744	0.895778	NA
DBP	DM	UKB	MT-ND4	ND4	NADH dehydrogenase subunit 4	10873	rs2857284	T	C	C	31767	-0.00363369	0.0884518	0.967232	NA
DBP	Overall	UKB	MT-ND4	ND4	NADH dehydrogenase subunit 4	10915	rs2857285	T	C	C	337023	-0.0164087	0.0154125	0.287039	NA
DBP	noDM	UKB	MT-ND4	ND4	NADH dehydrogenase subunit 4	10915	rs2857285	T	C	C	305253	-0.0113279	0.0162033	0.484483	NA
DBP	DM	UKB	MT-ND4	ND4	NADH dehydrogenase subunit 4	10915	rs2857285	T	C	C	31770	-0.0631438	0.0497127	0.204032	NA
DBP	Overall	BiLEVE	MT-ND4	ND4	NADH dehydrogenase subunit 4	11251	rs869096886,COSM1138232	A	G	G	40668	-0.0147499	0.0119534	0.217227	NA
DBP	noDM	BiLEVE	MT-ND4	ND4	NADH dehydrogenase subunit 4	11251	rs869096886,COSM1138232	A	G	G	36114	-0.0123539	0.0126764	0.329787	NA
DBP	DM	BiLEVE	MT-ND4	ND4	NADH dehydrogenase subunit 4	11251	rs869096886,COSM1138232	A	G	G	4554	-0.0305617	0.0357289	0.392386	NA
DBP	Overall	UKB	MT-ND4	ND4	NADH dehydrogenase subunit 4	11251	rs869096886,COSM1138232	A	G	G	336381	0.000212558	0.00418243	0.959468	NA
DBP	noDM	UKB	MT-ND4	ND4	NADH dehydrogenase subunit 4	11251	rs869096886,COSM1138232	A	G	G	304667	0.00241868	0.00439061	0.581719	NA
DBP	DM	UKB	MT-ND4	ND4	NADH dehydrogenase subunit 4	11251	rs869096886,COSM1138232	A	G	G	31714	-0.020411	0.0136778	0.135638	NA
DBP	Overall	BiLEVE	MT-ND4	ND4	NADH dehydrogenase subunit 4	11299	rs28358285	T	C	C	40762	0.0286075	0.0173969	0.1001	NA
DBP	noDM	BiLEVE	MT-ND4	ND4	NADH dehydrogenase subunit 4	11299	rs28358285	T	C	C	36201	0.0295692	0.0183575	0.107244	NA
DBP	DM	BiLEVE	MT-ND4	ND4	NADH dehydrogenase subunit 4	11299	rs28358285	T	C	C	4561	0.0278478	0.0541644	0.607183	NA
DBP	Overall	UKB	MT-ND4	ND4	NADH dehydrogenase subunit 4	11299	rs28358285	T	C	C	337145	-0.0042099	0.00604652	0.486272	NA
DBP	noDM	UKB	MT-ND4	ND4	NADH dehydrogenase subunit 4	11299	rs28358285	T	C	C	305369	-0.00467433	0.00634116	0.461037	NA
DBP	DM	UKB	MT-ND4	ND4	NADH dehydrogenase subunit 4	11299	rs28358285	T	C	C	31776	-0.000549638	0.0199632	0.978035	NA
DBP	Overall	UKB	MT-ND4	ND4	NADH dehydrogenase subunit 4	11332	rs55714831	C	T	T	337169	-0.00907259	0.0119129	0.446312	NA
DBP	noDM	UKB	MT-ND4	ND4	NADH dehydrogenase subunit 4	11332	rs55714831	C	T	T	305393	-0.0124409	0.012507	0.319875	NA
DBP	DM	UKB	MT-ND4	ND4	NADH dehydrogenase subunit 4	11332	rs55714831	C	T	T	31776	0.0226797	0.0389251	0.560133	NA
DBP	Overall	BiLEVE	MT-ND4	ND4	NADH dehydrogenase subunit 4	11377	rs193302938	G	A	A	40720	-0.00703889	0.0368489	0.848511	NA
DBP	noDM	BiLEVE	MT-ND4	ND4	NADH dehydrogenase subunit 4	11377	rs193302938	G	A	A	36166	-0.00572693	0.0391301	0.883641	NA
DBP	DM	BiLEVE	MT-ND4	ND4	NADH dehydrogenase subunit 4	11377	rs193302938	G	A	A	4554	-0.0481974	0.108863	0.657978	NA
DBP	Overall	UKB	MT-ND4	ND4	NADH dehydrogenase subunit 4	11377	rs193302938	G	A	A	336568	0.000359853	0.0128679	0.97769	NA
DBP	noDM	UKB	MT-ND4	ND4	NADH dehydrogenase subunit 4	11377	rs193302938	G	A	A	304833	0.00534708	0.0134855	0.691732	NA
DBP	DM	UKB	MT-ND4	ND4	NADH dehydrogenase subunit 4	11377	rs193302938	G	A	A	31735	-0.0479129	0.0427833	0.262766	NA
DBP	Overall	BiLEVE	MT-ND4	ND4	NADH dehydrogenase subunit 4	11467	rs2853493,COSM6716752,COSM6716753	A	G	G	40681	0.0115935	0.0117233	0.322705	NA
DBP	noDM	BiLEVE	MT-ND4	ND4	NADH dehydrogenase subunit 4	11467	rs2853493,COSM6716752,COSM6716753	A	G	G	36125	0.0135478	0.0124152	0.275182	NA
DBP	DM	BiLEVE	MT-ND4	ND4	NADH dehydrogenase subunit 4	11467	rs2853493,COSM6716752,COSM6716753	A	G	G	4556	-0.00206895	0.0353726	0.953361	NA
DBP	Overall	UKB	MT-ND4	ND4	NADH dehydrogenase subunit 4	11467	rs2853493,COSM6716752,COSM6716753	A	G	G	336509	0.00104643	0.0040766	0.797417	NA
DBP	noDM	UKB	MT-ND4	ND4	NADH dehydrogenase subunit 4	11467	rs2853493,COSM6716752,COSM6716753	A	G	G	304789	0.000866904	0.00427849	0.839433	NA
DBP	DM	UKB	MT-ND4	ND4	NADH dehydrogenase subunit 4	11467	rs2853493,COSM6716752,COSM6716753	A	G	G	31720	0.00183353	0.0133617	0.890856	NA
DBP	Overall	BiLEVE	MT-ND4	ND4	NADH dehydrogenase subunit 4	11485	-	T	C	C	40735	0.0897739	0.034577	0.00942538	NA
DBP	noDM	BiLEVE	MT-ND4	ND4	NADH dehydrogenase subunit 4	11485	-	T	C	C	36170	0.0894358	0.0368524	0.0152347	NA
DBP	DM	BiLEVE	MT-ND4	ND4	NADH dehydrogenase subunit 4	11485	-	T	C	C	4565	0.082123	0.0995479	0.409438	NA
DBP	Overall	BiLEVE	MT-ND4	ND4	NADH dehydrogenase subunit 4	11674	rs28358286	C	T	T	40755	0.00655762	0.0354555	0.853266	NA
DBP	noDM	BiLEVE	MT-ND4	ND4	NADH dehydrogenase subunit 4	11674	rs28358286	C	T	T	36192	0.0154447	0.037868	0.683381	NA
DBP	DM	BiLEVE	MT-ND4	ND4	NADH dehydrogenase subunit 4	11674	rs28358286	C	T	T	4563	-0.0792526	0.100384	0.429862	NA
DBP	Overall	UKB	MT-ND4	ND4	NADH dehydrogenase subunit 4	11674	rs28358286	C	T	T	337250	-0.00193373	0.0121243	0.873281	NA
DBP	noDM	UKB	MT-ND4	ND4	NADH dehydrogenase subunit 4	11674	rs28358286	C	T	T	305457	0.00477771	0.0127179	0.707165	NA
DBP	DM	UKB	MT-ND4	ND4	NADH dehydrogenase subunit 4	11674	rs28358286	C	T	T	31793	-0.0695439	0.0399458	0.0817009	NA
DBP	Overall	BiLEVE	MT-ND4	ND4	NADH dehydrogenase subunit 4	11719	rs2853495	A	G	G	40730	-0.000637918	0.00976371	0.947907	NA
DBP	noDM	BiLEVE	MT-ND4	ND4	NADH dehydrogenase subunit 4	11719	rs2853495	A	G	G	36170	-0.00581559	0.0103486	0.57414	NA
DBP	DM	BiLEVE	MT-ND4	ND4	NADH dehydrogenase subunit 4	11719	rs2853495	A	G	G	4560	0.0360469	0.0292901	0.218504	NA
DBP	Overall	BiLEVE	MT-ND4	ND4	NADH dehydrogenase subunit 4	11812	rs3088053	A	G	G	40736	0.033874	0.0178664	0.0579717	NA
DBP	noDM	BiLEVE	MT-ND4	ND4	NADH dehydrogenase subunit 4	11812	rs3088053	A	G	G	36173	0.0324051	0.0189321	0.0869694	NA
DBP	DM	BiLEVE	MT-ND4	ND4	NADH dehydrogenase subunit 4	11812	rs3088053	A	G	G	4563	0.0503016	0.0537601	0.349494	NA
DBP	Overall	UKB	MT-ND4	ND4	NADH dehydrogenase subunit 4	11812	rs3088053	A	G	G	337021	0.00823056	0.00625259	0.188059	NA
DBP	noDM	UKB	MT-ND4	ND4	NADH dehydrogenase subunit 4	11812	rs3088053	A	G	G	305253	0.0116942	0.00655923	0.0746103	NA
DBP	DM	UKB	MT-ND4	ND4	NADH dehydrogenase subunit 4	11812	rs3088053	A	G	G	31768	-0.0258529	0.0205841	0.209138	NA
DBP	Overall	UKB	MT-ND4	ND4	NADH dehydrogenase subunit 4	11914	rs2853496,COSM1155517	G	A	A	336403	0.0146427	0.0128433	0.254244	NA
DBP	noDM	UKB	MT-ND4	ND4	NADH dehydrogenase subunit 4	11914	rs2853496,COSM1155517	G	A	A	304699	0.0176127	0.0134618	0.190757	NA
DBP	DM	UKB	MT-ND4	ND4	NADH dehydrogenase subunit 4	11914	rs2853496,COSM1155517	G	A	A	31704	-0.0166632	0.0426416	0.695968	NA
DBP	Overall	UKB	MT-ND4	ND4	NADH dehydrogenase subunit 4	11947	rs28359168	A	G	G	337145	-0.00329809	0.0123641	0.789663	NA
DBP	noDM	UKB	MT-ND4	ND4	NADH dehydrogenase subunit 4	11947	rs28359168	A	G	G	305363	0.00348721	0.0129755	0.788119	NA
DBP	DM	UKB	MT-ND4	ND4	NADH dehydrogenase subunit 4	11947	rs28359168	A	G	G	31782	-0.0707836	0.0405531	0.0809157	NA
DBP	Overall	BiLEVE	MT-TL2	L(CUN)	tRNA leucine2	12308	rs2853498	A	G	G	40763	0.0105342	0.0116933	0.367662	NA
DBP	noDM	BiLEVE	MT-TL2	L(CUN)	tRNA leucine2	12308	rs2853498	A	G	G	36197	0.0131353	0.0123844	0.288864	NA
DBP	DM	BiLEVE	MT-TL2	L(CUN)	tRNA leucine2	12308	rs2853498	A	G	G	4566	-0.00886019	0.0352663	0.801642	NA
DBP	Overall	BiLEVE	MT-ND5	ND5	NADH dehydrogenase subunit 5	12372	rs2853499	G	A	A	40741	0.0123776	0.0116882	0.289617	NA
DBP	noDM	BiLEVE	MT-ND5	ND5	NADH dehydrogenase subunit 5	12372	rs2853499	G	A	A	36175	0.0148787	0.0123778	0.229354	NA
DBP	DM	BiLEVE	MT-ND5	ND5	NADH dehydrogenase subunit 5	12372	rs2853499	G	A	A	4566	-0.00679941	0.0352707	0.847142	NA
DBP	Overall	UKB	MT-ND5	ND5	NADH dehydrogenase subunit 5	12372	rs2853499	G	A	A	336924	0.000922946	0.00406615	0.820437	NA
DBP	noDM	UKB	MT-ND5	ND5	NADH dehydrogenase subunit 5	12372	rs2853499	G	A	A	305168	0.000594486	0.0042672	0.889201	NA
DBP	DM	UKB	MT-ND5	ND5	NADH dehydrogenase subunit 5	12372	rs2853499	G	A	A	31756	0.00323418	0.013337	0.808397	NA
DBP	Overall	BiLEVE	MT-ND5	ND5	NADH dehydrogenase subunit 5	12501	rs28397767	G	A	A	40755	0.00130457	0.0262777	0.960405	NA
DBP	noDM	BiLEVE	MT-ND5	ND5	NADH dehydrogenase subunit 5	12501	rs28397767	G	A	A	36193	0.00322263	0.0277101	0.907417	NA
DBP	DM	BiLEVE	MT-ND5	ND5	NADH dehydrogenase subunit 5	12501	rs28397767	G	A	A	4562	0.00172323	0.0821951	0.983274	NA
DBP	Overall	UKB	MT-ND5	ND5	NADH dehydrogenase subunit 5	12501	rs28397767	G	A	A	336852	-0.0122374	0.00913541	0.180391	NA
DBP	noDM	UKB	MT-ND5	ND5	NADH dehydrogenase subunit 5	12501	rs28397767	G	A	A	305100	-0.00817367	0.00958692	0.39389	NA
DBP	DM	UKB	MT-ND5	ND5	NADH dehydrogenase subunit 5	12501	rs28397767	G	A	A	31752	-0.0489907	0.029969	0.102119	NA
DBP	Overall	BiLEVE	MT-ND5	ND5	NADH dehydrogenase subunit 5	12612	rs28359172	A	G	G	40696	-0.0473512	0.0153764	0.00207509	NA
DBP	noDM	BiLEVE	MT-ND5	ND5	NADH dehydrogenase subunit 5	12612	rs28359172	A	G	G	36143	-0.0431148	0.0163018	0.00817761	NA
DBP	DM	BiLEVE	MT-ND5	ND5	NADH dehydrogenase subunit 5	12612	rs28359172	A	G	G	4553	-0.0812986	0.0460514	0.0775654	NA
DBP	Overall	UKB	MT-ND5	ND5	NADH dehydrogenase subunit 5	12612	rs28359172	A	G	G	336521	-0.00372873	0.00541788	0.49131	NA
DBP	noDM	UKB	MT-ND5	ND5	NADH dehydrogenase subunit 5	12612	rs28359172	A	G	G	304806	-0.00288242	0.00568969	0.612433	NA
DBP	DM	UKB	MT-ND5	ND5	NADH dehydrogenase subunit 5	12612	rs28359172	A	G	G	31715	-0.0109097	0.0176568	0.536659	NA
DBP	Overall	BiLEVE	MT-ND5	ND5	NADH dehydrogenase subunit 5	12633	rs3926883	C	A	A	40665	-0.0201397	0.0363452	0.579498	NA
DBP	noDM	BiLEVE	MT-ND5	ND5	NADH dehydrogenase subunit 5	12633	rs3926883	C	A	A	36116	-0.00837105	0.0387882	0.829133	NA
DBP	DM	BiLEVE	MT-ND5	ND5	NADH dehydrogenase subunit 5	12633	rs3926883	C	A	A	4549	-0.0973734	0.103584	0.347245	NA
DBP	Overall	UKB	MT-ND5	ND5	NADH dehydrogenase subunit 5	12633	rs3926883	C	A	A	337066	-0.0112641	0.0123559	0.361961	NA
DBP	noDM	UKB	MT-ND5	ND5	NADH dehydrogenase subunit 5	12633	rs3926883	C	A	A	305281	-0.00824206	0.0129808	0.525467	NA
DBP	DM	UKB	MT-ND5	ND5	NADH dehydrogenase subunit 5	12633	rs3926883	C	A	A	31785	-0.0414796	0.0401198	0.301193	NA
DBP	Overall	BiLEVE	MT-ND5	ND5	NADH dehydrogenase subunit 5	12705	rs193302956,COSM1155526	C	T	T	40712	-0.0023223	0.0190042	0.902742	NA
DBP	noDM	BiLEVE	MT-ND5	ND5	NADH dehydrogenase subunit 5	12705	rs193302956,COSM1155526	C	T	T	36150	0.00688958	0.0200994	0.731769	NA
DBP	DM	BiLEVE	MT-ND5	ND5	NADH dehydrogenase subunit 5	12705	rs193302956,COSM1155526	C	T	T	4562	-0.0746644	0.0579478	0.197646	NA
DBP	Overall	UKB	MT-ND5	ND5	NADH dehydrogenase subunit 5	12705	rs193302956,COSM1155526	C	T	T	336916	-0.00842531	0.00654893	0.198263	NA
DBP	noDM	UKB	MT-ND5	ND5	NADH dehydrogenase subunit 5	12705	rs193302956,COSM1155526	C	T	T	305163	-0.00469894	0.00686923	0.493941	NA
DBP	DM	UKB	MT-ND5	ND5	NADH dehydrogenase subunit 5	12705	rs193302956,COSM1155526	C	T	T	31753	-0.0419041	0.0215871	0.0522474	NA
DBP	Overall	UKB	MT-ND5	ND5	NADH dehydrogenase subunit 5	13020	rs75577869	T	C	C	337088	0.00949186	0.0149732	0.526132	NA
DBP	noDM	UKB	MT-ND5	ND5	NADH dehydrogenase subunit 5	13020	rs75577869	T	C	C	305317	0.00869096	0.0157244	0.580465	NA
DBP	DM	UKB	MT-ND5	ND5	NADH dehydrogenase subunit 5	13020	rs75577869	T	C	C	31771	0.0150854	0.0487897	0.757178	NA
DBP	Overall	UKB	MT-ND5	ND5	NADH dehydrogenase subunit 5	13104	rs878871104	A	G	G	336072	-0.00580657	0.0172842	0.736912	NA
DBP	noDM	UKB	MT-ND5	ND5	NADH dehydrogenase subunit 5	13104	rs878871104	A	G	G	304403	-0.00758645	0.0181893	0.676617	NA
DBP	DM	UKB	MT-ND5	ND5	NADH dehydrogenase subunit 5	13104	rs878871104	A	G	G	31669	0.0154641	0.0552534	0.779575	NA
DBP	Overall	BiLEVE	MT-ND5	ND5	NADH dehydrogenase subunit 5	13105	rs2853501,COSM6716789	A	G	G	40691	-0.0492227	0.0455967	0.280362	NA
DBP	noDM	BiLEVE	MT-ND5	ND5	NADH dehydrogenase subunit 5	13105	rs2853501,COSM6716789	A	G	G	36137	-0.0197845	0.0483875	0.682633	NA
DBP	DM	BiLEVE	MT-ND5	ND5	NADH dehydrogenase subunit 5	13105	rs2853501,COSM6716789	A	G	G	4554	-0.287582	0.135354	0.0336687	NA
DBP	Overall	UKB	MT-ND5	ND5	NADH dehydrogenase subunit 5	13105	rs2853501,COSM6716789	A	G	G	336530	-0.0129075	0.0156996	0.410989	NA
DBP	noDM	UKB	MT-ND5	ND5	NADH dehydrogenase subunit 5	13105	rs2853501,COSM6716789	A	G	G	304801	-0.0127025	0.0165065	0.441572	NA
DBP	DM	UKB	MT-ND5	ND5	NADH dehydrogenase subunit 5	13105	rs2853501,COSM6716789	A	G	G	31729	-0.0116893	0.050614	0.817356	NA
DBP	Overall	BiLEVE	MT-ND5	ND5	NADH dehydrogenase subunit 5	13617	rs2853503	T	C	C	40735	0.00460164	0.0167931	0.784071	NA
DBP	noDM	BiLEVE	MT-ND5	ND5	NADH dehydrogenase subunit 5	13617	rs2853503	T	C	C	36171	0.00526607	0.017815	0.767539	NA
DBP	DM	BiLEVE	MT-ND5	ND5	NADH dehydrogenase subunit 5	13617	rs2853503	T	C	C	4564	-0.00935886	0.0499765	0.851461	NA
DBP	Overall	UKB	MT-ND5	ND5	NADH dehydrogenase subunit 5	13617	rs2853503	T	C	C	336908	0.00241487	0.00586128	0.680337	NA
DBP	noDM	UKB	MT-ND5	ND5	NADH dehydrogenase subunit 5	13617	rs2853503	T	C	C	305156	0.00358182	0.00615138	0.560379	NA
DBP	DM	UKB	MT-ND5	ND5	NADH dehydrogenase subunit 5	13617	rs2853503	T	C	C	31752	-0.0102797	0.0192178	0.59272	NA
DBP	Overall	BiLEVE	MT-ND5	ND5	NADH dehydrogenase subunit 5	13708	rs28359178	G	A	A	40635	-0.0337729	0.0144494	0.0194271	NA
DBP	noDM	BiLEVE	MT-ND5	ND5	NADH dehydrogenase subunit 5	13708	rs28359178	G	A	A	36083	-0.0302744	0.0153005	0.0478633	NA
DBP	DM	BiLEVE	MT-ND5	ND5	NADH dehydrogenase subunit 5	13708	rs28359178	G	A	A	4552	-0.0588128	0.0436798	0.178224	NA
DBP	Overall	UKB	MT-ND5	ND5	NADH dehydrogenase subunit 5	13708	rs28359178	G	A	A	336007	-0.00705398	0.00509943	0.166578	NA
DBP	noDM	UKB	MT-ND5	ND5	NADH dehydrogenase subunit 5	13708	rs28359178	G	A	A	304326	-0.00740754	0.00535564	0.166626	NA
DBP	DM	UKB	MT-ND5	ND5	NADH dehydrogenase subunit 5	13708	rs28359178	G	A	A	31681	-0.00279246	0.0166058	0.866457	NA
DBP	Overall	UKB	MT-ND5	ND5	NADH dehydrogenase subunit 5	13759	rs386420024	G	A	A	335903	0.0147708	0.0132893	0.266363	NA
DBP	noDM	UKB	MT-ND5	ND5	NADH dehydrogenase subunit 5	13759	rs386420024	G	A	A	304231	0.013309	0.0139175	0.338933	NA
DBP	DM	UKB	MT-ND5	ND5	NADH dehydrogenase subunit 5	13759	rs386420024	G	A	A	31672	0.0277004	0.0444982	0.533614	NA
DBP	Overall	UKB	MT-ND5	ND5	NADH dehydrogenase subunit 5	13780	rs41358152	A	G	G	336997	-0.0117734	0.00943754	0.212211	NA
DBP	noDM	UKB	MT-ND5	ND5	NADH dehydrogenase subunit 5	13780	rs41358152	A	G	G	305237	-0.00669875	0.00991193	0.499151	NA
DBP	DM	UKB	MT-ND5	ND5	NADH dehydrogenase subunit 5	13780	rs41358152	A	G	G	31760	-0.0580878	0.0307249	0.0586895	NA
DBP	Overall	BiLEVE	MT-ND5	ND5	NADH dehydrogenase subunit 5	13879	rs879087566	T	C	C	40690	-0.101319	0.0398287	0.0109667	NA
DBP	noDM	BiLEVE	MT-ND5	ND5	NADH dehydrogenase subunit 5	13879	rs879087566	T	C	C	36134	-0.0899637	0.0423476	0.0336424	NA
DBP	DM	BiLEVE	MT-ND5	ND5	NADH dehydrogenase subunit 5	13879	rs879087566	T	C	C	4556	-0.187035	0.116546	0.108604	NA
DBP	Overall	UKB	MT-ND5	ND5	NADH dehydrogenase subunit 5	13879	rs879087566	T	C	C	336341	0.0167519	0.0142441	0.239571	NA
DBP	noDM	UKB	MT-ND5	ND5	NADH dehydrogenase subunit 5	13879	rs879087566	T	C	C	304625	0.0166107	0.0149458	0.266399	NA
DBP	DM	UKB	MT-ND5	ND5	NADH dehydrogenase subunit 5	13879	rs879087566	T	C	C	31716	0.0269461	0.0468103	0.56486	NA
DBP	Overall	BiLEVE	MT-ND5	ND5	NADH dehydrogenase subunit 5	13965	rs869156190	T	C	C	40669	0.099682	0.043618	0.022298	NA
DBP	noDM	BiLEVE	MT-ND5	ND5	NADH dehydrogenase subunit 5	13965	rs869156190	T	C	C	36113	0.0776593	0.0466952	0.0962986	NA
DBP	DM	BiLEVE	MT-ND5	ND5	NADH dehydrogenase subunit 5	13965	rs869156190	T	C	C	4556	0.254944	0.121615	0.0361087	NA
DBP	Overall	UKB	MT-ND5	ND5	NADH dehydrogenase subunit 5	13965	rs869156190	T	C	C	336596	-0.0248431	0.0155024	0.109038	NA
DBP	noDM	UKB	MT-ND5	ND5	NADH dehydrogenase subunit 5	13965	rs869156190	T	C	C	304870	-0.0231228	0.0162551	0.154884	NA
DBP	DM	UKB	MT-ND5	ND5	NADH dehydrogenase subunit 5	13965	rs869156190	T	C	C	31726	-0.0411447	0.0512708	0.422272	NA
DBP	Overall	BiLEVE	MT-ND5	ND5	NADH dehydrogenase subunit 5	13966	rs41535848	A	G	G	40763	0.00724115	0.036636	0.843319	NA
DBP	noDM	BiLEVE	MT-ND5	ND5	NADH dehydrogenase subunit 5	13966	rs41535848	A	G	G	36197	0.00882875	0.0385288	0.818756	NA
DBP	DM	BiLEVE	MT-ND5	ND5	NADH dehydrogenase subunit 5	13966	rs41535848	A	G	G	4566	0.0105572	0.117357	0.928325	NA
DBP	Overall	UKB	MT-ND5	ND5	NADH dehydrogenase subunit 5	13966	rs41535848	A	G	G	337049	-0.0274565	0.0127389	0.0311375	NA
DBP	noDM	UKB	MT-ND5	ND5	NADH dehydrogenase subunit 5	13966	rs41535848	A	G	G	305287	-0.0297414	0.0133218	0.0255808	NA
DBP	DM	UKB	MT-ND5	ND5	NADH dehydrogenase subunit 5	13966	rs41535848	A	G	G	31762	0.00155827	0.0432885	0.971285	NA
DBP	Overall	BiLEVE	MT-ND5	ND5	NADH dehydrogenase subunit 5	14133	rs879100848	A	G	G	40713	-0.0346387	0.0470095	0.461221	NA
DBP	noDM	BiLEVE	MT-ND5	ND5	NADH dehydrogenase subunit 5	14133	rs879100848	A	G	G	36152	-0.0362848	0.0502846	0.470552	NA
DBP	DM	BiLEVE	MT-ND5	ND5	NADH dehydrogenase subunit 5	14133	rs879100848	A	G	G	4561	-0.0734044	0.131781	0.577543	NA
DBP	Overall	BiLEVE	MT-ND6	ND6	NADH dehydrogenase subunit 6	14167	rs193302977	C	T	T	40766	0.028039	0.0174611	0.108326	NA
DBP	noDM	BiLEVE	MT-ND6	ND6	NADH dehydrogenase subunit 6	14167	rs193302977	C	T	T	36200	0.0281126	0.0184334	0.127246	NA
DBP	DM	BiLEVE	MT-ND6	ND6	NADH dehydrogenase subunit 6	14167	rs193302977	C	T	T	4566	0.0348975	0.0541569	0.519363	NA
DBP	Overall	UKB	MT-ND6	ND6	NADH dehydrogenase subunit 6	14167	rs193302977	C	T	T	337166	-0.00318787	0.00606698	0.599274	NA
DBP	noDM	UKB	MT-ND6	ND6	NADH dehydrogenase subunit 6	14167	rs193302977	C	T	T	305384	-0.00387106	0.00636287	0.542935	NA
DBP	DM	UKB	MT-ND6	ND6	NADH dehydrogenase subunit 6	14167	rs193302977	C	T	T	31782	0.0025675	0.0200238	0.897974	NA
DBP	Overall	BiLEVE	MT-ND6	ND6	NADH dehydrogenase subunit 6	14233	rs3915611,COSM1138250,COSM1138251	A	G	G	40756	0.0347551	0.0177755	0.0505632	NA
DBP	noDM	BiLEVE	MT-ND6	ND6	NADH dehydrogenase subunit 6	14233	rs3915611,COSM1138250,COSM1138251	A	G	G	36191	0.034015	0.0188416	0.0710338	NA
DBP	DM	BiLEVE	MT-ND6	ND6	NADH dehydrogenase subunit 6	14233	rs3915611,COSM1138250,COSM1138251	A	G	G	4565	0.0450949	0.0533587	0.398084	NA
DBP	Overall	UKB	MT-ND6	ND6	NADH dehydrogenase subunit 6	14582	rs41354845	A	G	G	333286	0.0245189	0.0125979	0.0516227	NA
DBP	noDM	UKB	MT-ND6	ND6	NADH dehydrogenase subunit 6	14582	rs41354845	A	G	G	301918	0.0236572	0.0132049	0.0732071	NA
DBP	DM	UKB	MT-ND6	ND6	NADH dehydrogenase subunit 6	14582	rs41354845	A	G	G	31368	0.0375426	0.0418107	0.369235	NA
DBP	Overall	UKB	MT-ND6	ND6	NADH dehydrogenase subunit 6	14620	rs879141731,COSM6716820,COSM6716821	C	T	T	336995	-0.00940923	0.0118381	0.426715	NA
DBP	noDM	UKB	MT-ND6	ND6	NADH dehydrogenase subunit 6	14620	rs879141731,COSM6716820,COSM6716821	C	T	T	305237	-0.0123658	0.0124309	0.31985	NA
DBP	DM	UKB	MT-ND6	ND6	NADH dehydrogenase subunit 6	14620	rs879141731,COSM6716820,COSM6716821	C	T	T	31758	0.0177498	0.0386091	0.645713	NA
DBP	Overall	BiLEVE	MT-CYB	Cytb	Cytochrome b	14766	rs193302980,rs527236041	T	C	C	40719	-0.0012516	0.00976633	0.898028	NA
DBP	noDM	BiLEVE	MT-CYB	Cytb	Cytochrome b	14766	rs193302980,rs527236041	T	C	C	36159	-0.00689556	0.0103514	0.505321	NA
DBP	DM	BiLEVE	MT-CYB	Cytb	Cytochrome b	14766	rs193302980,rs527236041	T	C	C	4560	0.0403808	0.0292863	0.168015	NA
DBP	Overall	BiLEVE	MT-CYB	Cytb	Cytochrome b	14793	rs2853504	A	G	G	40705	-0.00595654	0.0220313	0.786879	NA
DBP	noDM	BiLEVE	MT-CYB	Cytb	Cytochrome b	14793	rs2853504	A	G	G	36150	-0.00715269	0.0233798	0.759656	NA
DBP	DM	BiLEVE	MT-CYB	Cytb	Cytochrome b	14793	rs2853504	A	G	G	4555	-0.00957652	0.0654285	0.883639	NA
DBP	Overall	BiLEVE	MT-CYB	Cytb	Cytochrome b	14798	rs28357681	T	C	C	40764	-0.00821863	0.0131567	0.532189	NA
DBP	noDM	BiLEVE	MT-CYB	Cytb	Cytochrome b	14798	rs28357681	T	C	C	36203	-0.00508466	0.0139062	0.714636	NA
DBP	DM	BiLEVE	MT-CYB	Cytb	Cytochrome b	14798	rs28357681	T	C	C	4561	-0.0287848	0.0403855	0.476037	NA
DBP	Overall	UKB	MT-CYB	Cytb	Cytochrome b	14798	rs28357681	T	C	C	337036	-0.00532808	0.00458631	0.245344	NA
DBP	noDM	UKB	MT-CYB	Cytb	Cytochrome b	14798	rs28357681	T	C	C	305269	-0.00487621	0.00481379	0.311077	NA
DBP	DM	UKB	MT-CYB	Cytb	Cytochrome b	14798	rs28357681	T	C	C	31767	-0.0108835	0.0150222	0.468767	NA
DBP	Overall	UKB	MT-CYB	Cytb	Cytochrome b	14869	rs879218419	G	A	A	321651	0.000138195	0.0165914	0.993354	NA
DBP	noDM	UKB	MT-CYB	Cytb	Cytochrome b	14869	rs879218419	G	A	A	291265	0.00165437	0.0173906	0.924211	NA
DBP	DM	UKB	MT-CYB	Cytb	Cytochrome b	14869	rs879218419	G	A	A	30386	-0.0184301	0.0550742	0.737898	NA
DBP	Overall	UKB	MT-CYB	Cytb	Cytochrome b	14872	rs878879194,COSM1133253,COSM1133254	C	T	T	337195	-0.00354012	0.0170203	0.835234	NA
DBP	noDM	UKB	MT-CYB	Cytb	Cytochrome b	14872	rs878879194,COSM1133253,COSM1133254	C	T	T	305416	-0.00715382	0.017818	0.688056	NA
DBP	DM	UKB	MT-CYB	Cytb	Cytochrome b	14872	rs878879194,COSM1133253,COSM1133254	C	T	T	31779	0.0262971	0.0572036	0.645727	NA
DBP	Overall	BiLEVE	MT-CYB	Cytb	Cytochrome b	14905	rs193302983,rs527236203	G	A	A	40705	0.0261778	0.0162019	0.106161	NA
DBP	noDM	BiLEVE	MT-CYB	Cytb	Cytochrome b	14905	rs193302983,rs527236203	G	A	A	36149	0.0260256	0.0171863	0.129954	NA
DBP	DM	BiLEVE	MT-CYB	Cytb	Cytochrome b	14905	rs193302983,rs527236203	G	A	A	4556	0.0335191	0.0483147	0.487865	NA
DBP	Overall	UKB	MT-CYB	Cytb	Cytochrome b	14905	rs193302983,rs527236203	G	A	A	336830	0.00429792	0.0056499	0.446833	NA
DBP	noDM	UKB	MT-CYB	Cytb	Cytochrome b	14905	rs193302983,rs527236203	G	A	A	305080	0.00746686	0.005928	0.207818	NA
DBP	DM	UKB	MT-CYB	Cytb	Cytochrome b	14905	rs193302983,rs527236203	G	A	A	31750	-0.0270531	0.0185695	0.145165	NA
DBP	Overall	BiLEVE	MT-CYB	Cytb	Cytochrome b	15043	rs193302985,rs527236043	G	A	A	40698	-0.00204892	0.0246019	0.933627	NA
DBP	noDM	BiLEVE	MT-CYB	Cytb	Cytochrome b	15043	rs193302985,rs527236043	G	A	A	36137	-0.000906398	0.0259844	0.972174	NA
DBP	DM	BiLEVE	MT-CYB	Cytb	Cytochrome b	15043	rs193302985,rs527236043	G	A	A	4561	-0.0079156	0.0759392	0.916987	NA
DBP	Overall	UKB	MT-CYB	Cytb	Cytochrome b	15043	rs193302985,rs527236043	G	A	A	336651	-0.0127287	0.00850711	0.134592	NA
DBP	noDM	UKB	MT-CYB	Cytb	Cytochrome b	15043	rs193302985,rs527236043	G	A	A	304917	-0.00932716	0.00893724	0.296658	NA
DBP	DM	UKB	MT-CYB	Cytb	Cytochrome b	15043	rs193302985,rs527236043	G	A	A	31734	-0.0422225	0.0276269	0.126445	NA
DBP	Overall	BiLEVE	MT-CYB	Cytb	Cytochrome b	15218	rs2853506	A	G	G	40695	-0.0198843	0.0249118	0.424767	NA
DBP	noDM	BiLEVE	MT-CYB	Cytb	Cytochrome b	15218	rs2853506	A	G	G	36140	-0.0225009	0.0265045	0.395917	NA
DBP	DM	BiLEVE	MT-CYB	Cytb	Cytochrome b	15218	rs2853506	A	G	G	4555	-0.00865961	0.0725596	0.905008	NA
DBP	Overall	UKB	MT-CYB	Cytb	Cytochrome b	15218	rs2853506	A	G	G	336851	0.00317687	0.00866066	0.713757	NA
DBP	noDM	UKB	MT-CYB	Cytb	Cytochrome b	15218	rs2853506	A	G	G	305101	0.00687222	0.00907721	0.449	NA
DBP	DM	UKB	MT-CYB	Cytb	Cytochrome b	15218	rs2853506	A	G	G	31750	-0.0325185	0.0287655	0.258288	NA
DBP	Overall	BiLEVE	MT-CYB	Cytb	Cytochrome b	15257	rs41518645,COSM1138306,COSM1138307	G	A	A	40731	0.0427603	0.0326867	0.190818	NA
DBP	noDM	BiLEVE	MT-CYB	Cytb	Cytochrome b	15257	rs41518645,COSM1138306,COSM1138307	G	A	A	36169	0.0386509	0.0347853	0.266521	NA
DBP	DM	BiLEVE	MT-CYB	Cytb	Cytochrome b	15257	rs41518645,COSM1138306,COSM1138307	G	A	A	4562	0.0483887	0.0950695	0.610789	NA
DBP	Overall	UKB	MT-CYB	Cytb	Cytochrome b	15257	rs41518645,COSM1138306,COSM1138307	G	A	A	337013	-0.00929188	0.011663	0.425627	NA
DBP	noDM	UKB	MT-CYB	Cytb	Cytochrome b	15257	rs41518645,COSM1138306,COSM1138307	G	A	A	305254	-0.0140254	0.0122292	0.251432	NA
DBP	DM	UKB	MT-CYB	Cytb	Cytochrome b	15257	rs41518645,COSM1138306,COSM1138307	G	A	A	31759	0.0396938	0.0385752	0.303489	NA
DBP	Overall	UKB	MT-CYB	Cytb	Cytochrome b	15301	rs193302991,rs527236045	G	A	A	336955	0.008787	0.0213182	0.680205	NA
DBP	noDM	UKB	MT-CYB	Cytb	Cytochrome b	15301	rs193302991,rs527236045	G	A	A	305189	0.0135478	0.022446	0.546129	NA
DBP	DM	UKB	MT-CYB	Cytb	Cytochrome b	15301	rs193302991,rs527236045	G	A	A	31766	-0.0332526	0.0678096	0.623867	NA
DBP	Overall	BiLEVE	MT-CYB	Cytb	Cytochrome b	15452	rs193302994,rs527236209	C	A	A	40591	-0.0131107	0.011953	0.272714	NA
DBP	noDM	BiLEVE	MT-CYB	Cytb	Cytochrome b	15452	rs193302994,rs527236209	C	A	A	36044	-0.0115798	0.0126725	0.360842	NA
DBP	DM	BiLEVE	MT-CYB	Cytb	Cytochrome b	15452	rs193302994,rs527236209	C	A	A	4547	-0.0222602	0.035809	0.534213	NA
DBP	Overall	UKB	MT-CYB	Cytb	Cytochrome b	15452	rs193302994,rs527236209	C	A	A	335946	-0.00018457	0.00418163	0.964794	NA
DBP	noDM	UKB	MT-CYB	Cytb	Cytochrome b	15452	rs193302994,rs527236209	C	A	A	304280	0.00174839	0.00438989	0.690427	NA
DBP	DM	UKB	MT-CYB	Cytb	Cytochrome b	15452	rs193302994,rs527236209	C	A	A	31666	-0.0183845	0.0136721	0.17874	NA
DBP	Overall	BiLEVE	MT-CYB	Cytb	Cytochrome b	15693	rs200975632,COSM6716259,COSM6716260	T	C	C	40775	-0.000513496	0.0338586	0.9879	NA
DBP	noDM	BiLEVE	MT-CYB	Cytb	Cytochrome b	15693	rs200975632,COSM6716259,COSM6716260	T	C	C	36211	0.0245087	0.0358894	0.494678	NA
DBP	DM	BiLEVE	MT-CYB	Cytb	Cytochrome b	15693	rs200975632,COSM6716259,COSM6716260	T	C	C	4564	-0.175702	0.101408	0.0832304	NA
DBP	Overall	UKB	MT-CYB	Cytb	Cytochrome b	15693	rs200975632,COSM6716259,COSM6716260	T	C	C	337253	-0.00875717	0.0119178	0.462462	NA
DBP	noDM	UKB	MT-CYB	Cytb	Cytochrome b	15693	rs200975632,COSM6716259,COSM6716260	T	C	C	305462	-0.011835	0.0125135	0.344261	NA
DBP	DM	UKB	MT-CYB	Cytb	Cytochrome b	15693	rs200975632,COSM6716259,COSM6716260	T	C	C	31791	0.0200321	0.0389019	0.606599	NA
DBP	Overall	BiLEVE	MT-CYB	Cytb	Cytochrome b	15758	rs527236193	A	G	G	40751	-0.0166348	0.0351399	0.635938	NA
DBP	noDM	BiLEVE	MT-CYB	Cytb	Cytochrome b	15758	rs527236193	A	G	G	36190	-0.00673114	0.0370675	0.855904	NA
DBP	DM	BiLEVE	MT-CYB	Cytb	Cytochrome b	15758	rs527236193	A	G	G	4561	-0.0674545	0.109662	0.538512	NA
DBP	Overall	UKB	MT-CYB	Cytb	Cytochrome b	15758	rs527236193	A	G	G	337045	0.00730383	0.0123513	0.554292	NA
DBP	noDM	UKB	MT-CYB	Cytb	Cytochrome b	15758	rs527236193	A	G	G	305278	0.0133785	0.012948	0.30149	NA
DBP	DM	UKB	MT-CYB	Cytb	Cytochrome b	15758	rs527236193	A	G	G	31767	-0.0550674	0.0409457	0.17867	NA
DBP	Overall	BiLEVE	MT-CYB	Cytb	Cytochrome b	15833	rs41504845	C	T	T	40743	-5.31994e-05	0.0351957	0.998794	NA
DBP	noDM	BiLEVE	MT-CYB	Cytb	Cytochrome b	15833	rs41504845	C	T	T	36183	0.0113291	0.0372113	0.760784	NA
DBP	DM	BiLEVE	MT-CYB	Cytb	Cytochrome b	15833	rs41504845	C	T	T	4560	-0.0719011	0.107714	0.504474	NA
DBP	Overall	UKB	MT-CYB	Cytb	Cytochrome b	15833	rs41504845	C	T	T	336959	0.0182701	0.012203	0.134346	NA
DBP	noDM	UKB	MT-CYB	Cytb	Cytochrome b	15833	rs41504845	C	T	T	305205	0.0209608	0.0128071	0.101703	NA
DBP	DM	UKB	MT-CYB	Cytb	Cytochrome b	15833	rs41504845	C	T	T	31754	-0.00855488	0.0400056	0.830671	NA
DBP	Overall	BiLEVE	MT-CYB	Cytb	Cytochrome b	15884	rs527236195	G	A	A	40687	0.0345988	0.0423104	0.413512	NA
DBP	noDM	BiLEVE	MT-CYB	Cytb	Cytochrome b	15884	rs527236195	G	A	A	36128	0.0221852	0.0454184	0.625225	NA
DBP	DM	BiLEVE	MT-CYB	Cytb	Cytochrome b	15884	rs527236195	G	A	A	4559	0.101177	0.11581	0.38236	NA
DBP	Overall	UKB	MT-CYB	Cytb	Cytochrome b	15884	rs527236195	G	A	A	336557	0.00375346	0.0147243	0.798787	NA
DBP	noDM	UKB	MT-CYB	Cytb	Cytochrome b	15884	rs527236195	G	A	A	304830	0.00489676	0.0153992	0.750495	NA
DBP	DM	UKB	MT-CYB	Cytb	Cytochrome b	15884	rs527236195	G	A	A	31727	-0.0101352	0.0499867	0.839326	NA
DBP	Overall	UKB	MT-TT	T	tRNA threonine	15924	-	A	G	G	336130	-0.0095406	0.00717529	0.183636	NA
DBP	noDM	UKB	MT-TT	T	tRNA threonine	15924	-	A	G	G	304448	-0.00445869	0.00752677	0.553598	NA
DBP	DM	UKB	MT-TT	T	tRNA threonine	15924	-	A	G	G	31682	-0.0569711	0.0236348	0.0159375	NA
DBP	Overall	BiLEVE	MT-TT	T	tRNA threonine	15928	rs527236198	G	A	A	40539	0.0242341	0.0162471	0.135813	NA
DBP	noDM	BiLEVE	MT-TT	T	tRNA threonine	15928	rs527236198	G	A	A	36006	0.0256472	0.017232	0.136668	NA
DBP	DM	BiLEVE	MT-TT	T	tRNA threonine	15928	rs527236198	G	A	A	4533	0.0192936	0.0484779	0.690658	NA
DBP	Overall	UKB	MT-TT	T	tRNA threonine	15928	rs527236198	G	A	A	335416	0.00485727	0.00566734	0.391411	NA
DBP	noDM	UKB	MT-TT	T	tRNA threonine	15928	rs527236198	G	A	A	303800	0.00823508	0.00594708	0.166137	NA
DBP	DM	UKB	MT-TT	T	tRNA threonine	15928	rs527236198	G	A	A	31616	-0.0280772	0.018602	0.131216	NA
DBP	Overall	UKB	MT-HV1	CR:HVS1/HV1	Hypervariable segment 1 [classic:16024-16365]	16145	rs41419246	G	A	A	336790	0.00360405	0.00942056	0.702037	NA
DBP	noDM	UKB	MT-HV1	CR:HVS1/HV1	Hypervariable segment 1 [classic:16024-16365]	16145	rs41419246	G	A	A	305042	0.00378156	0.00987312	0.701709	NA
DBP	DM	UKB	MT-HV1	CR:HVS1/HV1	Hypervariable segment 1 [classic:16024-16365]	16145	rs41419246	G	A	A	31748	0.00653611	0.0313113	0.834648	NA
DBP	Overall	BiLEVE	MT-TAS	CR:TAS	termination-associated sequence	16162	rs41466049	A	G	G	40689	-0.0325098	0.0316945	0.305028	NA
DBP	noDM	BiLEVE	MT-TAS	CR:TAS	termination-associated sequence	16162	rs41466049	A	G	G	36129	-0.0300249	0.0335574	0.370936	NA
DBP	DM	BiLEVE	MT-TAS	CR:TAS	termination-associated sequence	16162	rs41466049	A	G	G	4560	-0.0465153	0.0958312	0.627424	NA
DBP	Overall	BiLEVE	MT-TAS	CR:TAS	termination-associated sequence	16172	rs2853817	T	C	C	40656	-0.038929	0.0249084	0.118087	NA
DBP	noDM	BiLEVE	MT-TAS	CR:TAS	termination-associated sequence	16172	rs2853817	T	C	C	36094	-0.0376541	0.0264175	0.154066	NA
DBP	DM	BiLEVE	MT-TAS	CR:TAS	termination-associated sequence	16172	rs2853817	T	C	C	4562	-0.0474587	0.0742801	0.522911	NA
DBP	Overall	BiLEVE	MT-HV1	CR:HVS1/HV1	Hypervariable segment 1 [classic:16024-16365]	16193	rs879091650	C	T	T	40611	0.0314831	0.0404435	0.436311	NA
DBP	noDM	BiLEVE	MT-HV1	CR:HVS1/HV1	Hypervariable segment 1 [classic:16024-16365]	16193	rs879091650	C	T	T	36066	0.0328818	0.0426834	0.441089	NA
DBP	DM	BiLEVE	MT-HV1	CR:HVS1/HV1	Hypervariable segment 1 [classic:16024-16365]	16193	rs879091650	C	T	T	4545	0.0410773	0.125525	0.743499	NA
DBP	Overall	UKB	MT-HV1	CR:HVS1/HV1	Hypervariable segment 1 [classic:16024-16365]	16193	rs879091650	C	T	T	336177	0.00509348	0.0150111	0.734373	NA
DBP	noDM	UKB	MT-HV1	CR:HVS1/HV1	Hypervariable segment 1 [classic:16024-16365]	16193	rs879091650	C	T	T	304498	0.0108814	0.0157643	0.490033	NA
DBP	DM	UKB	MT-HV1	CR:HVS1/HV1	Hypervariable segment 1 [classic:16024-16365]	16193	rs879091650	C	T	T	31679	-0.0403298	0.0489181	0.409698	NA
DBP	Overall	BiLEVE	MT-HV1	CR:HVS1/HV1	Hypervariable segment 1 [classic:16024-16365]	16223	rs2853513	C	T	T	40675	0.00279667	0.0188185	0.88186	NA
DBP	noDM	BiLEVE	MT-HV1	CR:HVS1/HV1	Hypervariable segment 1 [classic:16024-16365]	16223	rs2853513	C	T	T	36125	0.00977721	0.0199042	0.623279	NA
DBP	DM	BiLEVE	MT-HV1	CR:HVS1/HV1	Hypervariable segment 1 [classic:16024-16365]	16223	rs2853513	C	T	T	4550	-0.0522964	0.0573503	0.361883	NA
DBP	Overall	UKB	MT-HV1	CR:HVS1/HV1	Hypervariable segment 1 [classic:16024-16365]	16270	rs2857290	C	T	T	336239	0.00170012	0.00598085	0.77621	NA
DBP	noDM	UKB	MT-HV1	CR:HVS1/HV1	Hypervariable segment 1 [classic:16024-16365]	16270	rs2857290	C	T	T	304539	0.00362502	0.00627624	0.563549	NA
DBP	DM	UKB	MT-HV1	CR:HVS1/HV1	Hypervariable segment 1 [classic:16024-16365]	16270	rs2857290	C	T	T	31700	-0.0185088	0.0196302	0.345754	NA
DBP	Overall	BiLEVE	MT-HV1	CR:HVS1/HV1	Hypervariable segment 1 [classic:16024-16365]	16298	rs148377232	T	C	C	40711	-0.0141512	0.0242957	0.560261	NA
DBP	noDM	BiLEVE	MT-HV1	CR:HVS1/HV1	Hypervariable segment 1 [classic:16024-16365]	16298	rs148377232	T	C	C	36155	-0.0212323	0.0258655	0.411723	NA
DBP	DM	BiLEVE	MT-HV1	CR:HVS1/HV1	Hypervariable segment 1 [classic:16024-16365]	16298	rs148377232	T	C	C	4556	0.0383013	0.0703525	0.586179	NA
DBP	Overall	BiLEVE	MT-HV1	CR:HVS1/HV1	Hypervariable segment 1 [classic:16024-16365]	16356	rs62581340	T	C	C	40559	0.0273493	0.0246432	0.267088	NA
DBP	noDM	BiLEVE	MT-HV1	CR:HVS1/HV1	Hypervariable segment 1 [classic:16024-16365]	16356	rs62581340	T	C	C	36011	0.0315998	0.0261795	0.227424	NA
DBP	DM	BiLEVE	MT-HV1	CR:HVS1/HV1	Hypervariable segment 1 [classic:16024-16365]	16356	rs62581340	T	C	C	4548	0.00637	0.0726343	0.930119	NA
DBP	Overall	UKB	MT-HV1	CR:HVS1/HV1	Hypervariable segment 1 [classic:16024-16365]	16356	rs62581340	T	C	C	335540	-0.00528439	0.00861658	0.539691	NA
DBP	noDM	UKB	MT-HV1	CR:HVS1/HV1	Hypervariable segment 1 [classic:16024-16365]	16356	rs62581340	T	C	C	303946	-0.00919918	0.00903508	0.308602	NA
DBP	DM	UKB	MT-HV1	CR:HVS1/HV1	Hypervariable segment 1 [classic:16024-16365]	16356	rs62581340	T	C	C	31594	0.0363381	0.0284941	0.202217	NA
DBP	Overall	BiLEVE	MT-HV1	CR:HVS1/HV1	Hypervariable segment 1 [classic:16024-16365]	16362	rs62581341	T	C	C	40655	0.0126747	0.0176391	0.472418	NA
DBP	noDM	BiLEVE	MT-HV1	CR:HVS1/HV1	Hypervariable segment 1 [classic:16024-16365]	16362	rs62581341	T	C	C	36100	0.00261821	0.0188263	0.889394	NA
DBP	DM	BiLEVE	MT-HV1	CR:HVS1/HV1	Hypervariable segment 1 [classic:16024-16365]	16362	rs62581341	T	C	C	4555	0.0751013	0.0502049	0.13475	NA
DBP	Overall	UKB	MT-HV1	CR:HVS1/HV1	Hypervariable segment 1 [classic:16024-16365]	16362	rs62581341	T	C	C	336332	-0.00623475	0.00616343	0.311744	NA
DBP	noDM	UKB	MT-HV1	CR:HVS1/HV1	Hypervariable segment 1 [classic:16024-16365]	16362	rs62581341	T	C	C	304636	-0.00791483	0.00646739	0.221027	NA
DBP	DM	UKB	MT-HV1	CR:HVS1/HV1	Hypervariable segment 1 [classic:16024-16365]	16362	rs62581341	T	C	C	31696	0.0115286	0.0202391	0.568938	NA
DBP	Overall	UKB	NA	CR:HVS2	Hypervariable segment 2 [classic:73-340 ]	16391	rs869031877	G	A	A	336131	-0.0135682	0.00948736	0.15268	NA
DBP	noDM	UKB	NA	CR:HVS2	Hypervariable segment 2 [classic:73-340 ]	16391	rs869031877	G	A	A	304434	-0.00913329	0.00996263	0.359272	NA
DBP	DM	UKB	NA	CR:HVS2	Hypervariable segment 2 [classic:73-340 ]	16391	rs869031877	G	A	A	31697	-0.0543885	0.0309341	0.0787226	NA

## Sheet: HDL
PHENO	COHORT	ARRAY	GENE	REGION	DESCRIPTION	BP	RS	REF	ALT	A1	OBS_CT	OR.or.BETA	SE.or.LOG(OR)_SE	P	SP2
HDL	Overall	BiLEVE	MT-HV2	CR:HVS2	Hypervariable segment 2 [classic:73-340 ]	73	rs869183622	G	A	A	35658	0.000110895	0.00966309	0.990844	NA
HDL	noDM	BiLEVE	MT-HV2	CR:HVS2	Hypervariable segment 2 [classic:73-340 ]	73	rs869183622	G	A	A	31655	-0.00385367	0.0103374	0.709306	NA
HDL	DM	BiLEVE	MT-HV2	CR:HVS2	Hypervariable segment 2 [classic:73-340 ]	73	rs869183622	G	A	A	4003	0.0278318	0.0296409	0.347806	NA
HDL	Overall	UKB	MT-HV2	CR:HVS2	Hypervariable segment 2 [classic:73-340 ]	73	rs869183622	G	A	A	294140	0.00215194	0.0033309	0.518244	NA
HDL	noDM	UKB	MT-HV2	CR:HVS2	Hypervariable segment 2 [classic:73-340 ]	73	rs869183622	G	A	A	266951	0.00163125	0.00351471	0.642562	NA
HDL	DM	UKB	MT-HV2	CR:HVS2	Hypervariable segment 2 [classic:73-340 ]	73	rs869183622	G	A	A	27189	0.0066264	0.011146	0.552176	NA
HDL	Overall	BiLEVE	MT-OHR	CR:OH	H-strand origins	150	rs62581312	C	T	T	35645	-0.00227722	0.0165242	0.89039	NA
HDL	noDM	BiLEVE	MT-OHR	CR:OH	H-strand origins	150	rs62581312	C	T	T	31644	-0.00754667	0.0176464	0.668901	NA
HDL	DM	BiLEVE	MT-OHR	CR:OH	H-strand origins	150	rs62581312	C	T	T	4001	0.0347925	0.0513889	0.498418	NA
HDL	Overall	UKB	MT-OHR	CR:OH	H-strand origins	150	rs62581312	C	T	T	294000	-0.00544236	0.00573529	0.342659	NA
HDL	noDM	UKB	MT-OHR	CR:OH	H-strand origins	150	rs62581312	C	T	T	266806	-0.00555541	0.00604988	0.35848	NA
HDL	DM	UKB	MT-OHR	CR:OH	H-strand origins	150	rs62581312	C	T	T	27194	-0.00486455	0.0192506	0.800505	NA
HDL	Overall	BiLEVE	MT-OHR	CR:OH	H-strand origins	228	rs41323649	G	A	A	35618	-0.0200043	0.0194099	0.302724	NA
HDL	noDM	BiLEVE	MT-OHR	CR:OH	H-strand origins	228	rs41323649	G	A	A	31621	-0.0210533	0.0207135	0.309445	NA
HDL	DM	BiLEVE	MT-OHR	CR:OH	H-strand origins	228	rs41323649	G	A	A	3997	-0.0159356	0.0607949	0.793243	NA
HDL	Overall	UKB	MT-OHR	CR:OH	H-strand origins	228	rs41323649	G	A	A	293787	-0.00178639	0.00675623	0.791467	NA
HDL	noDM	UKB	MT-OHR	CR:OH	H-strand origins	228	rs41323649	G	A	A	266614	-0.00329587	0.00713288	0.644034	NA
HDL	DM	UKB	MT-OHR	CR:OH	H-strand origins	228	rs41323649	G	A	A	27173	0.00993406	0.022487	0.65866	NA
HDL	Overall	BiLEVE	MT-TFX	CR:TFX	mtTF1 binding site	239	rs879149197	T	C	C	35636	0.0236954	0.0287867	0.410435	NA
HDL	noDM	BiLEVE	MT-TFX	CR:TFX	mtTF1 binding site	239	rs879149197	T	C	C	31635	0.00133054	0.0307604	0.965499	NA
HDL	DM	BiLEVE	MT-TFX	CR:TFX	mtTF1 binding site	239	rs879149197	T	C	C	4001	0.181772	0.0891449	0.0415097	NA
HDL	Overall	BiLEVE	MT-OHR	CR:OH	H-strand origins	263	rs2853515	G	A	A	35688	0.0271357	0.0458731	0.554163	NA
HDL	noDM	BiLEVE	MT-OHR	CR:OH	H-strand origins	263	rs2853515	G	A	A	31686	0.00449964	0.0488978	0.926682	NA
HDL	DM	BiLEVE	MT-OHR	CR:OH	H-strand origins	263	rs2853515	G	A	A	4002	0.202246	0.144816	0.162619	NA
HDL	Overall	UKB	MT-TFY	CR:TFY	mtTF1 binding site	295	rs41528348	C	T	T	292281	-0.00162753	0.00535289	0.761092	NA
HDL	noDM	UKB	MT-TFY	CR:TFY	mtTF1 binding site	295	rs41528348	C	T	T	265232	-0.00281058	0.00565217	0.619008	NA
HDL	DM	UKB	MT-TFY	CR:TFY	mtTF1 binding site	295	rs41528348	C	T	T	27049	0.00820125	0.0177913	0.644825	NA
HDL	Overall	BiLEVE	MT-HV3	CR:HVS3	Hypervariable segment 3	456	rs41356551	C	T	T	35594	0.0110048	0.0245672	0.654195	NA
HDL	noDM	BiLEVE	MT-HV3	CR:HVS3	Hypervariable segment 3	456	rs41356551	C	T	T	31600	0.0129444	0.0263256	0.62293	NA
HDL	DM	BiLEVE	MT-HV3	CR:HVS3	Hypervariable segment 3	456	rs41356551	C	T	T	3994	0.00441558	0.074432	0.952697	NA
HDL	Overall	BiLEVE	MT-HV3	CR:HVS3	Hypervariable segment 3	497	rs28660704	C	T	T	35696	-0.0133314	0.0225494	0.554383	NA
HDL	noDM	BiLEVE	MT-HV3	CR:HVS3	Hypervariable segment 3	497	rs28660704	C	T	T	31689	0.00177096	0.0240214	0.94123	NA
HDL	DM	BiLEVE	MT-HV3	CR:HVS3	Hypervariable segment 3	497	rs28660704	C	T	T	4007	-0.134387	0.0716163	0.0606612	NA
HDL	Overall	UKB	MT-HV3	CR:HVS3	Hypervariable segment 3	497	rs28660704	C	T	T	294406	0.0021849	0.00778826	0.779065	NA
HDL	noDM	UKB	MT-HV3	CR:HVS3	Hypervariable segment 3	497	rs28660704	C	T	T	267185	0.00966579	0.00821052	0.239099	NA
HDL	DM	UKB	MT-HV3	CR:HVS3	Hypervariable segment 3	497	rs28660704	C	T	T	27221	-0.0667023	0.0262936	0.0111916	NA
HDL	Overall	BiLEVE	MT-RNR1	12S	12S ribosomal RNA	709	rs2853517	G	A	A	35559	0.0083619	0.0135615	0.537508	NA
HDL	noDM	BiLEVE	MT-RNR1	12S	12S ribosomal RNA	709	rs2853517	G	A	A	31571	0.0133701	0.0145345	0.357637	NA
HDL	DM	BiLEVE	MT-RNR1	12S	12S ribosomal RNA	709	rs2853517	G	A	A	3988	-0.026056	0.0410237	0.525372	NA
HDL	Overall	UKB	MT-RNR1	12S	12S ribosomal RNA	709	rs2853517	G	A	A	293024	-0.00416313	0.00469791	0.375529	NA
HDL	noDM	UKB	MT-RNR1	12S	12S ribosomal RNA	709	rs2853517	G	A	A	265922	-0.00367338	0.00495821	0.458774	NA
HDL	DM	UKB	MT-RNR1	12S	12S ribosomal RNA	709	rs2853517	G	A	A	27102	-0.00868593	0.0156825	0.579678	NA
HDL	Overall	UKB	MT-RNR1	12S	12S ribosomal RNA	750	rs2853518	G	A	A	288164	0.00627855	0.0129301	0.627267	NA
HDL	noDM	UKB	MT-RNR1	12S	12S ribosomal RNA	750	rs2853518	G	A	A	261633	0.00500674	0.0136313	0.713397	NA
HDL	DM	UKB	MT-RNR1	12S	12S ribosomal RNA	750	rs2853518	G	A	A	26531	0.0131035	0.0436672	0.764121	NA
HDL	Overall	BiLEVE	MT-RNR1	12S	12S ribosomal RNA	1243	rs28358572	T	C	C	35716	0.0422593	0.0353706	0.23219	NA
HDL	noDM	BiLEVE	MT-RNR1	12S	12S ribosomal RNA	1243	rs28358572	T	C	C	31706	0.0561694	0.0383273	0.142789	NA
HDL	DM	BiLEVE	MT-RNR1	12S	12S ribosomal RNA	1243	rs28358572	T	C	C	4010	-0.0544873	0.0989939	0.582069	NA
HDL	Overall	UKB	MT-RNR1	12S	12S ribosomal RNA	1243	rs28358572	T	C	C	294615	-0.0108167	0.0119931	0.367103	NA
HDL	noDM	UKB	MT-RNR1	12S	12S ribosomal RNA	1243	rs28358572	T	C	C	267375	-0.00586785	0.0126521	0.642804	NA
HDL	DM	UKB	MT-RNR1	12S	12S ribosomal RNA	1243	rs28358572	T	C	C	27240	-0.059134	0.0402113	0.141415	NA
HDL	Overall	BiLEVE	MT-RNR1	12S	12S ribosomal RNA	1438	rs2001030	G	A	A	35652	0.052594	0.0292537	0.0722077	NA
HDL	noDM	BiLEVE	MT-RNR1	12S	12S ribosomal RNA	1438	rs2001030	G	A	A	31648	0.0239422	0.0314057	0.445856	NA
HDL	DM	BiLEVE	MT-RNR1	12S	12S ribosomal RNA	1438	rs2001030	G	A	A	4004	0.251642	0.0872469	0.00394442	NA
HDL	Overall	UKB	MT-RNR1	12S	12S ribosomal RNA	1438	rs2001030	G	A	A	294045	-0.0109723	0.0100207	0.273533	NA
HDL	noDM	UKB	MT-RNR1	12S	12S ribosomal RNA	1438	rs2001030	G	A	A	266851	-0.00929904	0.0106071	0.380661	NA
HDL	DM	UKB	MT-RNR1	12S	12S ribosomal RNA	1438	rs2001030	G	A	A	27194	-0.0316504	0.0325382	0.330703	NA
HDL	Overall	BiLEVE	MT-RNR2	16S	16S ribosomal RNA	1719	rs3928305	G	A	A	35644	-0.0124514	0.0175735	0.478618	NA
HDL	noDM	BiLEVE	MT-RNR2	16S	16S ribosomal RNA	1719	rs3928305	G	A	A	31641	-0.0116447	0.0187336	0.534212	NA
HDL	DM	BiLEVE	MT-RNR2	16S	16S ribosomal RNA	1719	rs3928305	G	A	A	4003	-0.0196107	0.0555036	0.723865	NA
HDL	Overall	UKB	MT-RNR2	16S	16S ribosomal RNA	1719	rs3928305	G	A	A	294074	0.00356081	0.00602397	0.55445	NA
HDL	noDM	UKB	MT-RNR2	16S	16S ribosomal RNA	1719	rs3928305	G	A	A	266878	0.00492417	0.00635	0.438069	NA
HDL	DM	UKB	MT-RNR2	16S	16S ribosomal RNA	1719	rs3928305	G	A	A	27196	-0.00853875	0.0203559	0.674873	NA
HDL	Overall	BiLEVE	MT-RNR2	16S	16S ribosomal RNA	1721	rs200626438	C	T	T	35712	-0.00385976	0.0300589	0.897828	NA
HDL	noDM	BiLEVE	MT-RNR2	16S	16S ribosomal RNA	1721	rs200626438	C	T	T	31703	-0.00920403	0.032038	0.773896	NA
HDL	DM	BiLEVE	MT-RNR2	16S	16S ribosomal RNA	1721	rs200626438	C	T	T	4009	0.0209231	0.0949949	0.825684	NA
HDL	Overall	UKB	MT-RNR2	16S	16S ribosomal RNA	1721	rs200626438	C	T	T	294521	-0.0070983	0.0103779	0.493986	NA
HDL	noDM	UKB	MT-RNR2	16S	16S ribosomal RNA	1721	rs200626438	C	T	T	267279	-0.00375766	0.0109429	0.731306	NA
HDL	DM	UKB	MT-RNR2	16S	16S ribosomal RNA	1721	rs200626438	C	T	T	27242	-0.0384901	0.0349606	0.270925	NA
HDL	Overall	BiLEVE	MT-RNR2	16S	16S ribosomal RNA	1811	rs28358576	A	G	G	35679	-0.00778669	0.0143373	0.587059	NA
HDL	noDM	BiLEVE	MT-RNR2	16S	16S ribosomal RNA	1811	rs28358576	A	G	G	31674	-0.00472361	0.0152807	0.757231	NA
HDL	DM	BiLEVE	MT-RNR2	16S	16S ribosomal RNA	1811	rs28358576	A	G	G	4005	-0.0296593	0.0453377	0.513029	NA
HDL	Overall	UKB	MT-RNR2	16S	16S ribosomal RNA	2158	rs41349444	T	C	C	294615	-0.0353362	0.0141066	0.0122476	NA
HDL	noDM	UKB	MT-RNR2	16S	16S ribosomal RNA	2158	rs41349444	T	C	C	267371	-0.0361153	0.0148961	0.015331	NA
HDL	DM	UKB	MT-RNR2	16S	16S ribosomal RNA	2158	rs41349444	T	C	C	27244	-0.0302377	0.0468657	0.518803	NA
HDL	Overall	BiLEVE	MT-RNR2	16S	16S ribosomal RNA	2706	rs2854128	G	A	A	35681	0.00979104	0.00967981	0.311788	NA
HDL	noDM	BiLEVE	MT-RNR2	16S	16S ribosomal RNA	2706	rs2854128	G	A	A	31672	0.00427699	0.0103552	0.679589	NA
HDL	DM	BiLEVE	MT-RNR2	16S	16S ribosomal RNA	2706	rs2854128	G	A	A	4009	0.049466	0.029725	0.0961669	NA
HDL	Overall	UKB	MT-RNR2	16S	16S ribosomal RNA	2706	rs2854128	G	A	A	294233	0.00238157	0.00333902	0.47569	NA
HDL	noDM	UKB	MT-RNR2	16S	16S ribosomal RNA	2706	rs2854128	G	A	A	267022	0.00173885	0.00352312	0.621622	NA
HDL	DM	UKB	MT-RNR2	16S	16S ribosomal RNA	2706	rs2854128	G	A	A	27211	0.00772754	0.0111775	0.489352	NA
HDL	Overall	BiLEVE	MT-RNR2	16S	16S ribosomal RNA	3010	rs3928306	G	A	A	35664	0.000221867	0.010931	0.983806	NA
HDL	noDM	BiLEVE	MT-RNR2	16S	16S ribosomal RNA	3010	rs3928306	G	A	A	31663	0.000161629	0.0116877	0.988967	NA
HDL	DM	BiLEVE	MT-RNR2	16S	16S ribosomal RNA	3010	rs3928306	G	A	A	4001	-5.28135e-05	0.033652	0.998748	NA
HDL	Overall	UKB	MT-RNR2	16S	16S ribosomal RNA	3010	rs3928306	G	A	A	293994	-0.000850408	0.00378036	0.822015	NA
HDL	noDM	UKB	MT-RNR2	16S	16S ribosomal RNA	3010	rs3928306	G	A	A	266811	-0.000750128	0.00398917	0.850844	NA
HDL	DM	UKB	MT-RNR2	16S	16S ribosomal RNA	3010	rs3928306	G	A	A	27183	-0.00226455	0.0126417	0.857834	NA
HDL	Overall	BiLEVE	MT-RNR2	16S	16S ribosomal RNA	3197	rs2854131	T	C	C	35612	0.0103816	0.0165977	0.531656	NA
HDL	noDM	BiLEVE	MT-RNR2	16S	16S ribosomal RNA	3197	rs2854131	T	C	C	31613	0.00687148	0.0177541	0.698732	NA
HDL	DM	BiLEVE	MT-RNR2	16S	16S ribosomal RNA	3197	rs2854131	T	C	C	3999	0.0330761	0.0509266	0.516061	NA
HDL	Overall	UKB	MT-RNR2	16S	16S ribosomal RNA	3197	rs2854131	T	C	C	293984	-0.00245744	0.00576941	0.670149	NA
HDL	noDM	UKB	MT-RNR2	16S	16S ribosomal RNA	3197	rs2854131	T	C	C	266802	-0.00301294	0.00608542	0.620524	NA
HDL	DM	UKB	MT-RNR2	16S	16S ribosomal RNA	3197	rs2854131	T	C	C	27182	0.0030627	0.0193772	0.874413	NA
HDL	Overall	UKB	MT-ND1	ND1	NADH Dehydrogenase subunit 1	3394	rs41460449	T	C	C	294080	-0.0102119	0.0138708	0.4616	NA
HDL	noDM	UKB	MT-ND1	ND1	NADH Dehydrogenase subunit 1	3394	rs41460449	T	C	C	266878	-0.0106068	0.0146428	0.468839	NA
HDL	DM	UKB	MT-ND1	ND1	NADH Dehydrogenase subunit 1	3394	rs41460449	T	C	C	27202	-0.0123536	0.0462048	0.789189	NA
HDL	Overall	BiLEVE	MT-ND1	ND1	NADH Dehydrogenase subunit 1	3480	rs28358584	A	G	G	35686	-0.0220016	0.0171669	0.199981	NA
HDL	noDM	BiLEVE	MT-ND1	ND1	NADH Dehydrogenase subunit 1	3480	rs28358584	A	G	G	31679	-0.0174677	0.018271	0.339061	NA
HDL	DM	BiLEVE	MT-ND1	ND1	NADH Dehydrogenase subunit 1	3480	rs28358584	A	G	G	4007	-0.0579763	0.0549779	0.2917	NA
HDL	Overall	UKB	MT-ND1	ND1	NADH Dehydrogenase subunit 1	3480	rs28358584	A	G	G	294379	-0.00318523	0.0059116	0.590018	NA
HDL	noDM	UKB	MT-ND1	ND1	NADH Dehydrogenase subunit 1	3480	rs28358584	A	G	G	267157	0.000152686	0.00623725	0.98047	NA
HDL	DM	UKB	MT-ND1	ND1	NADH Dehydrogenase subunit 1	3480	rs28358584	A	G	G	27222	-0.0327767	0.0197933	0.097744	NA
HDL	Overall	UKB	MT-ND1	ND1	NADH Dehydrogenase subunit 1	3720	rs41355750	A	G	G	294097	0.0231201	0.0152936	0.130598	NA
HDL	noDM	UKB	MT-ND1	ND1	NADH Dehydrogenase subunit 1	3720	rs41355750	A	G	G	266910	0.0246638	0.0161749	0.127304	NA
HDL	DM	UKB	MT-ND1	ND1	NADH Dehydrogenase subunit 1	3720	rs41355750	A	G	G	27187	0.0093375	0.0500498	0.852004	NA
HDL	Overall	BiLEVE	MT-ND1	ND1	NADH Dehydrogenase subunit 1	3796	rs28357970	A	G	G	35679	-0.0260885	0.0382162	0.494828	NA
HDL	noDM	BiLEVE	MT-ND1	ND1	NADH Dehydrogenase subunit 1	3796	rs28357970	A	G	G	31672	-0.0303199	0.0410586	0.460245	NA
HDL	DM	BiLEVE	MT-ND1	ND1	NADH Dehydrogenase subunit 1	3796	rs28357970	A	G	G	4007	-0.0118925	0.113501	0.916557	NA
HDL	Overall	UKB	MT-ND1	ND1	NADH Dehydrogenase subunit 1	3796	rs28357970	A	G	G	294342	0.0105106	0.01327	0.428328	NA
HDL	noDM	UKB	MT-ND1	ND1	NADH Dehydrogenase subunit 1	3796	rs28357970	A	G	G	267122	0.0141825	0.0139955	0.310889	NA
HDL	DM	UKB	MT-ND1	ND1	NADH Dehydrogenase subunit 1	3796	rs28357970	A	G	G	27220	-0.0218469	0.0446114	0.624339	NA
HDL	Overall	UKB	MT-ND1	ND1	NADH Dehydrogenase subunit 1	3915	rs41524046,COSM1138362,COSM1138363	G	A	A	294298	0.00314316	0.0103071	0.760404	NA
HDL	noDM	UKB	MT-ND1	ND1	NADH Dehydrogenase subunit 1	3915	rs41524046,COSM1138362,COSM1138363	G	A	A	267074	-8.99819e-07	0.01088	0.999934	NA
HDL	DM	UKB	MT-ND1	ND1	NADH Dehydrogenase subunit 1	3915	rs41524046,COSM1138362,COSM1138363	G	A	A	27224	0.0370018	0.034362	0.281568	NA
HDL	Overall	BiLEVE	MT-ND1	ND1	NADH Dehydrogenase subunit 1	3992	rs879051705	C	T	T	35697	0.0215566	0.031788	0.497691	NA
HDL	noDM	BiLEVE	MT-ND1	ND1	NADH Dehydrogenase subunit 1	3992	rs879051705	C	T	T	31689	0.0391731	0.0335845	0.243459	NA
HDL	DM	BiLEVE	MT-ND1	ND1	NADH Dehydrogenase subunit 1	3992	rs879051705	C	T	T	4008	-0.158052	0.108953	0.146959	NA
HDL	Overall	UKB	MT-ND1	ND1	NADH Dehydrogenase subunit 1	3992	rs879051705	C	T	T	294359	0.0201225	0.0110883	0.0695645	NA
HDL	noDM	UKB	MT-ND1	ND1	NADH Dehydrogenase subunit 1	3992	rs879051705	C	T	T	267133	0.0200101	0.0116892	0.0869261	NA
HDL	DM	UKB	MT-ND1	ND1	NADH Dehydrogenase subunit 1	3992	rs879051705	C	T	T	27226	0.0209753	0.0374481	0.575404	NA
HDL	Overall	BiLEVE	MT-ND1	ND1	NADH Dehydrogenase subunit 1	4024	-	A	G	G	35684	0.00389579	0.0344131	0.909867	NA
HDL	noDM	BiLEVE	MT-ND1	ND1	NADH Dehydrogenase subunit 1	4024	-	A	G	G	31680	0.024608	0.036418	0.49923	NA
HDL	DM	BiLEVE	MT-ND1	ND1	NADH Dehydrogenase subunit 1	4024	-	A	G	G	4004	-0.202703	0.116008	0.0806599	NA
HDL	Overall	UKB	MT-ND1	ND1	NADH Dehydrogenase subunit 1	4024	-	A	G	G	294434	0.0225445	0.0120451	0.061253	NA
HDL	noDM	UKB	MT-ND1	ND1	NADH Dehydrogenase subunit 1	4024	-	A	G	G	267211	0.0206833	0.0127006	0.103412	NA
HDL	DM	UKB	MT-ND1	ND1	NADH Dehydrogenase subunit 1	4024	-	A	G	G	27223	0.0410655	0.0405945	0.311737	NA
HDL	Overall	BiLEVE	MT-ND1	ND1	NADH Dehydrogenase subunit 1	4216	COSM1138370,COSM1138371	T	C	C	35646	-0.010976	0.0116882	0.347706	NA
HDL	noDM	BiLEVE	MT-ND1	ND1	NADH Dehydrogenase subunit 1	4216	COSM1138370,COSM1138371	T	C	C	31645	-0.00789992	0.012509	0.527692	NA
HDL	DM	BiLEVE	MT-ND1	ND1	NADH Dehydrogenase subunit 1	4216	COSM1138370,COSM1138371	T	C	C	4001	-0.0336552	0.0357886	0.347076	NA
HDL	Overall	UKB	MT-ND1	ND1	NADH Dehydrogenase subunit 1	4216	COSM1138370,COSM1138371	T	C	C	294199	-0.00324041	0.00405635	0.424379	NA
HDL	noDM	UKB	MT-ND1	ND1	NADH Dehydrogenase subunit 1	4216	COSM1138370,COSM1138371	T	C	C	266994	-0.00402284	0.00428098	0.347373	NA
HDL	DM	UKB	MT-ND1	ND1	NADH Dehydrogenase subunit 1	4216	COSM1138370,COSM1138371	T	C	C	27205	0.0032461	0.0135494	0.810662	NA
HDL	Overall	BiLEVE	MT-TQ	Q	tRNA glutamine	4336	rs41456348	T	C	C	35645	0.0209054	0.0315641	0.507774	NA
HDL	noDM	BiLEVE	MT-TQ	Q	tRNA glutamine	4336	rs41456348	T	C	C	31637	0.018237	0.0336937	0.588334	NA
HDL	DM	BiLEVE	MT-TQ	Q	tRNA glutamine	4336	rs41456348	T	C	C	4008	0.0625319	0.0985693	0.525859	NA
HDL	Overall	UKB	MT-TQ	Q	tRNA glutamine	4336	rs41456348	T	C	C	294326	-0.00159633	0.0107265	0.881695	NA
HDL	noDM	UKB	MT-TQ	Q	tRNA glutamine	4336	rs41456348	T	C	C	267115	-0.000520459	0.0113079	0.963289	NA
HDL	DM	UKB	MT-TQ	Q	tRNA glutamine	4336	rs41456348	T	C	C	27211	-0.00956493	0.0362227	0.791736	NA
HDL	Overall	UKB	MT-ND2	ND2	NADH dehydrogenase subunit 2	4529	-	A	T	T	294514	0.0235807	0.00938027	0.0119422	NA
HDL	noDM	UKB	MT-ND2	ND2	NADH dehydrogenase subunit 2	4529	-	A	T	T	267278	0.0271567	0.0098956	0.00606399	NA
HDL	DM	UKB	MT-ND2	ND2	NADH dehydrogenase subunit 2	4529	-	A	T	T	27236	-0.00558699	0.0314548	0.859023	NA
HDL	Overall	BiLEVE	MT-ND2	ND2	NADH dehydrogenase subunit 2	4561	-	T	C	C	35699	-0.0196705	0.0434058	0.650425	NA
HDL	noDM	BiLEVE	MT-ND2	ND2	NADH dehydrogenase subunit 2	4561	-	T	C	C	31691	-0.00733701	0.0462154	0.873861	NA
HDL	DM	BiLEVE	MT-ND2	ND2	NADH dehydrogenase subunit 2	4561	-	T	C	C	4008	-0.122248	0.138415	0.377183	NA
HDL	Overall	UKB	MT-ND2	ND2	NADH dehydrogenase subunit 2	4561	-	T	C	C	294382	0.0157458	0.014975	0.293042	NA
HDL	noDM	UKB	MT-ND2	ND2	NADH dehydrogenase subunit 2	4561	-	T	C	C	267161	0.02103	0.0158515	0.184613	NA
HDL	DM	UKB	MT-ND2	ND2	NADH dehydrogenase subunit 2	4561	-	T	C	C	27221	-0.0297477	0.0486167	0.540621	NA
HDL	Overall	BiLEVE	MT-ND2	ND2	NADH dehydrogenase subunit 2	4580	-	G	A	A	35601	-0.013455	0.0269232	0.61725	NA
HDL	noDM	BiLEVE	MT-ND2	ND2	NADH dehydrogenase subunit 2	4580	-	G	A	A	31606	0.00514095	0.0289105	0.858863	NA
HDL	DM	BiLEVE	MT-ND2	ND2	NADH dehydrogenase subunit 2	4580	-	G	A	A	3995	-0.141763	0.0801626	0.0770642	NA
HDL	Overall	UKB	MT-ND2	ND2	NADH dehydrogenase subunit 2	4580	-	G	A	A	293645	0.00626007	0.00918711	0.495621	NA
HDL	noDM	UKB	MT-ND2	ND2	NADH dehydrogenase subunit 2	4580	-	G	A	A	266501	0.00817617	0.0097064	0.399594	NA
HDL	DM	UKB	MT-ND2	ND2	NADH dehydrogenase subunit 2	4580	-	G	A	A	27144	-0.00761843	0.030367	0.80191	NA
HDL	Overall	BiLEVE	MT-ND2	ND2	NADH dehydrogenase subunit 2	4646	rs375312364	T	C	C	35706	0.0364432	0.0324293	0.261116	NA
HDL	noDM	BiLEVE	MT-ND2	ND2	NADH dehydrogenase subunit 2	4646	rs375312364	T	C	C	31698	0.0326707	0.0346396	0.345607	NA
HDL	DM	BiLEVE	MT-ND2	ND2	NADH dehydrogenase subunit 2	4646	rs375312364	T	C	C	4008	0.0709737	0.100636	0.480695	NA
HDL	Overall	BiLEVE	MT-ND2	ND2	NADH dehydrogenase subunit 2	4769	rs3021086	G	A	A	35656	0.0630236	0.0307476	0.0404005	NA
HDL	noDM	BiLEVE	MT-ND2	ND2	NADH dehydrogenase subunit 2	4769	rs3021086	G	A	A	31655	0.0278784	0.032983	0.397987	NA
HDL	DM	BiLEVE	MT-ND2	ND2	NADH dehydrogenase subunit 2	4769	rs3021086	G	A	A	4001	0.317014	0.0922245	0.000593304	NONE
HDL	Overall	UKB	MT-ND2	ND2	NADH dehydrogenase subunit 2	4769	rs3021086	G	A	A	294348	-0.0154611	0.0105137	0.14141	NA
HDL	noDM	UKB	MT-ND2	ND2	NADH dehydrogenase subunit 2	4769	rs3021086	G	A	A	267129	-0.0133566	0.0111256	0.229936	NA
HDL	DM	UKB	MT-ND2	ND2	NADH dehydrogenase subunit 2	4769	rs3021086	G	A	A	27219	-0.0429247	0.0342352	0.209919	NA
HDL	Overall	BiLEVE	MT-ND2	ND2	NADH dehydrogenase subunit 2	4793	-	A	G	G	35665	-0.0632315	0.0409401	0.122479	NA
HDL	noDM	BiLEVE	MT-ND2	ND2	NADH dehydrogenase subunit 2	4793	-	A	G	G	31662	-0.0607494	0.0437007	0.164501	NA
HDL	DM	BiLEVE	MT-ND2	ND2	NADH dehydrogenase subunit 2	4793	-	A	G	G	4003	-0.0767556	0.127751	0.547993	NA
HDL	Overall	UKB	MT-ND2	ND2	NADH dehydrogenase subunit 2	4793	-	A	G	G	294360	0.00744115	0.0143307	0.60359	NA
HDL	noDM	UKB	MT-ND2	ND2	NADH dehydrogenase subunit 2	4793	-	A	G	G	267138	0.0142298	0.0151339	0.347083	NA
HDL	DM	UKB	MT-ND2	ND2	NADH dehydrogenase subunit 2	4793	-	A	G	G	27222	-0.0472747	0.0475679	0.320312	NA
HDL	Overall	BiLEVE	MT-ND2	ND2	NADH dehydrogenase subunit 2	4917	rs28357980	A	G	G	35649	0.00435451	0.0160709	0.786426	NA
HDL	noDM	BiLEVE	MT-ND2	ND2	NADH dehydrogenase subunit 2	4917	rs28357980	A	G	G	31644	0.00833023	0.0172237	0.628638	NA
HDL	DM	BiLEVE	MT-ND2	ND2	NADH dehydrogenase subunit 2	4917	rs28357980	A	G	G	4005	-0.0183417	0.0486672	0.706283	NA
HDL	Overall	UKB	MT-ND2	ND2	NADH dehydrogenase subunit 2	4917	rs28357980	A	G	G	294157	-0.00304981	0.00555115	0.58273	NA
HDL	noDM	UKB	MT-ND2	ND2	NADH dehydrogenase subunit 2	4917	rs28357980	A	G	G	266953	-0.00350508	0.00585719	0.549558	NA
HDL	DM	UKB	MT-ND2	ND2	NADH dehydrogenase subunit 2	4917	rs28357980	A	G	G	27204	0.00146659	0.018581	0.937089	NA
HDL	Overall	BiLEVE	MT-ND2	ND2	NADH dehydrogenase subunit 2	5004	-	T	C	C	35690	0.00116529	0.0333722	0.972145	NA
HDL	noDM	BiLEVE	MT-ND2	ND2	NADH dehydrogenase subunit 2	5004	-	T	C	C	31682	0.0240715	0.0354104	0.496644	NA
HDL	DM	BiLEVE	MT-ND2	ND2	NADH dehydrogenase subunit 2	5004	-	T	C	C	4008	-0.216992	0.109718	0.0480271	NA
HDL	Overall	UKB	MT-ND2	ND2	NADH dehydrogenase subunit 2	5004	-	T	C	C	294410	0.027847	0.0116822	0.0171397	NA
HDL	noDM	UKB	MT-ND2	ND2	NADH dehydrogenase subunit 2	5004	-	T	C	C	267178	0.0267764	0.0123216	0.0297715	NA
HDL	DM	UKB	MT-ND2	ND2	NADH dehydrogenase subunit 2	5004	-	T	C	C	27232	0.0388593	0.039252	0.322185	NA
HDL	Overall	UKB	MT-ND2	ND2	NADH dehydrogenase subunit 2	5046	rs878927053	G	A	A	293993	-0.0124448	0.0119314	0.296934	NA
HDL	noDM	UKB	MT-ND2	ND2	NADH dehydrogenase subunit 2	5046	rs878927053	G	A	A	266802	-0.0067227	0.0125883	0.593313	NA
HDL	DM	UKB	MT-ND2	ND2	NADH dehydrogenase subunit 2	5046	rs878927053	G	A	A	27191	-0.06833	0.0399653	0.0873268	NA
HDL	Overall	BiLEVE	MT-ND2	ND2	NADH dehydrogenase subunit 2	5147	rs367778601	G	A	A	35662	-0.00539365	0.020359	0.791067	NA
HDL	noDM	BiLEVE	MT-ND2	ND2	NADH dehydrogenase subunit 2	5147	rs367778601	G	A	A	31660	-0.00909225	0.0217283	0.675619	NA
HDL	DM	BiLEVE	MT-ND2	ND2	NADH dehydrogenase subunit 2	5147	rs367778601	G	A	A	4002	0.0269589	0.0637465	0.672385	NA
HDL	Overall	UKB	MT-ND2	ND2	NADH dehydrogenase subunit 2	5147	rs367778601	G	A	A	294347	-0.00696094	0.00710762	0.327401	NA
HDL	noDM	UKB	MT-ND2	ND2	NADH dehydrogenase subunit 2	5147	rs367778601	G	A	A	267133	-0.00838234	0.00749447	0.263367	NA
HDL	DM	UKB	MT-ND2	ND2	NADH dehydrogenase subunit 2	5147	rs367778601	G	A	A	27214	0.0064794	0.0239473	0.786724	NA
HDL	Overall	UKB	MT-ND2	ND2	NADH dehydrogenase subunit 2	5390	rs41333444	A	G	G	294483	0.0255039	0.01547	0.0992287	NA
HDL	noDM	UKB	MT-ND2	ND2	NADH dehydrogenase subunit 2	5390	rs41333444	A	G	G	267256	0.0273001	0.01637	0.0953789	NA
HDL	DM	UKB	MT-ND2	ND2	NADH dehydrogenase subunit 2	5390	rs41333444	A	G	G	27227	0.0107502	0.0503767	0.831019	NA
HDL	Overall	UKB	MT-ND2	ND2	NADH dehydrogenase subunit 2	5495	rs3020602	T	C	C	294152	0.00131421	0.0131539	0.920416	NA
HDL	noDM	UKB	MT-ND2	ND2	NADH dehydrogenase subunit 2	5495	rs3020602	T	C	C	266950	0.000664091	0.0138241	0.961685	NA
HDL	DM	UKB	MT-ND2	ND2	NADH dehydrogenase subunit 2	5495	rs3020602	T	C	C	27202	0.00973445	0.0458616	0.831908	NA
HDL	Overall	BiLEVE	MT-NC4	NC4	non-coding nucleotides	5656	-	A	G	G	35692	-0.0123604	0.04206	0.768854	NA
HDL	noDM	BiLEVE	MT-NC4	NC4	non-coding nucleotides	5656	-	A	G	G	31686	-0.0179375	0.0450393	0.690439	NA
HDL	DM	BiLEVE	MT-NC4	NC4	non-coding nucleotides	5656	-	A	G	G	4006	0.0522806	0.128015	0.683006	NA
HDL	Overall	UKB	MT-NC4	NC4	non-coding nucleotides	5656	-	A	G	G	294421	0.00700297	0.0149413	0.639285	NA
HDL	noDM	UKB	MT-NC4	NC4	non-coding nucleotides	5656	-	A	G	G	267191	-0.00315782	0.015855	0.842131	NA
HDL	DM	UKB	MT-NC4	NC4	non-coding nucleotides	5656	-	A	G	G	27230	0.0908399	0.0474455	0.055552	NA
HDL	Overall	UKB	MT-CO1	COI	Cytochrome c oxidase subunit I	5999	rs879118820	T	C	C	294302	0.0208325	0.0116891	0.0747137	NA
HDL	noDM	UKB	MT-CO1	COI	Cytochrome c oxidase subunit I	5999	rs879118820	T	C	C	267080	0.0184317	0.0123662	0.136097	NA
HDL	DM	UKB	MT-CO1	COI	Cytochrome c oxidase subunit I	5999	rs879118820	T	C	C	27222	0.0415324	0.0381524	0.276344	NA
HDL	Overall	UKB	MT-CO1	COI	Cytochrome c oxidase subunit I	6047	rs879104796	A	G	G	294414	0.0214387	0.0116655	0.0660959	NA
HDL	noDM	UKB	MT-CO1	COI	Cytochrome c oxidase subunit I	6047	rs879104796	A	G	G	267192	0.0194198	0.0123313	0.115295	NA
HDL	DM	UKB	MT-CO1	COI	Cytochrome c oxidase subunit I	6047	rs879104796	A	G	G	27222	0.0385804	0.0383688	0.314658	NA
HDL	Overall	UKB	MT-CO1	COI	Cytochrome c oxidase subunit I	6221	rs370472320	T	C	C	294277	-0.0299436	0.0134986	0.0265368	NA
HDL	noDM	UKB	MT-CO1	COI	Cytochrome c oxidase subunit I	6221	rs370472320	T	C	C	267068	-0.0326055	0.0141957	0.0216279	NA
HDL	DM	UKB	MT-CO1	COI	Cytochrome c oxidase subunit I	6221	rs370472320	T	C	C	27209	-0.00853265	0.0467431	0.855157	NA
HDL	Overall	BiLEVE	MT-CO1	COI	Cytochrome c oxidase subunit I	6371	rs878870695	C	T	T	35658	0.0428262	0.0411721	0.298266	NA
HDL	noDM	BiLEVE	MT-CO1	COI	Cytochrome c oxidase subunit I	6371	rs878870695	C	T	T	31654	0.0551266	0.0434822	0.20488	NA
HDL	DM	BiLEVE	MT-CO1	COI	Cytochrome c oxidase subunit I	6371	rs878870695	C	T	T	4004	-0.0744955	0.141659	0.599002	NA
HDL	Overall	UKB	MT-CO1	COI	Cytochrome c oxidase subunit I	6371	rs878870695	C	T	T	294089	-0.035166	0.0140814	0.0125134	NA
HDL	noDM	UKB	MT-CO1	COI	Cytochrome c oxidase subunit I	6371	rs878870695	C	T	T	266899	-0.0361357	0.0148095	0.0146866	NA
HDL	DM	UKB	MT-CO1	COI	Cytochrome c oxidase subunit I	6371	rs878870695	C	T	T	27190	-0.0281701	0.0487362	0.563261	NA
HDL	Overall	BiLEVE	MT-CO1	COI	Cytochrome c oxidase subunit I	6734	-	G	A	A	35567	-0.00854045	0.0477364	0.85801	NA
HDL	noDM	BiLEVE	MT-CO1	COI	Cytochrome c oxidase subunit I	6734	-	G	A	A	31574	-0.00927971	0.0513535	0.856602	NA
HDL	DM	BiLEVE	MT-CO1	COI	Cytochrome c oxidase subunit I	6734	-	G	A	A	3993	0.000172105	0.140602	0.999023	NA
HDL	Overall	UKB	MT-CO1	COI	Cytochrome c oxidase subunit I	6734	-	G	A	A	293743	0.0256952	0.0161513	0.111632	NA
HDL	noDM	UKB	MT-CO1	COI	Cytochrome c oxidase subunit I	6734	-	G	A	A	266589	0.0257873	0.0171165	0.13192	NA
HDL	DM	UKB	MT-CO1	COI	Cytochrome c oxidase subunit I	6734	-	G	A	A	27154	0.0266357	0.0518916	0.60775	NA
HDL	Overall	BiLEVE	MT-CO1	COI	Cytochrome c oxidase subunit I	6776	-	T	C	C	35675	-0.0129817	0.0214891	0.545776	NA
HDL	noDM	BiLEVE	MT-CO1	COI	Cytochrome c oxidase subunit I	6776	-	T	C	C	31670	-0.0144029	0.0229628	0.530515	NA
HDL	DM	BiLEVE	MT-CO1	COI	Cytochrome c oxidase subunit I	6776	-	T	C	C	4005	-0.000968926	0.0664853	0.988373	NA
HDL	Overall	UKB	MT-CO1	COI	Cytochrome c oxidase subunit I	6776	-	T	C	C	294239	0.0103111	0.00736116	0.16129	NA
HDL	noDM	UKB	MT-CO1	COI	Cytochrome c oxidase subunit I	6776	-	T	C	C	267024	0.00897872	0.00777077	0.247908	NA
HDL	DM	UKB	MT-CO1	COI	Cytochrome c oxidase subunit I	6776	-	T	C	C	27215	0.0213887	0.024522	0.383094	NA
HDL	Overall	BiLEVE	MT-CO1	COI	Cytochrome c oxidase subunit I	7028	-	T	C	C	35683	0.0112033	0.0096842	0.247337	NA
HDL	noDM	BiLEVE	MT-CO1	COI	Cytochrome c oxidase subunit I	7028	-	T	C	C	31680	0.0054296	0.0103595	0.6002	NA
HDL	DM	BiLEVE	MT-CO1	COI	Cytochrome c oxidase subunit I	7028	-	T	C	C	4003	0.0534585	0.0297508	0.0724315	NA
HDL	Overall	UKB	MT-CO1	COI	Cytochrome c oxidase subunit I	7028	-	T	C	C	294285	0.00238768	0.00333959	0.474633	NA
HDL	noDM	UKB	MT-CO1	COI	Cytochrome c oxidase subunit I	7028	-	T	C	C	267070	0.00157069	0.00352366	0.655776	NA
HDL	DM	UKB	MT-CO1	COI	Cytochrome c oxidase subunit I	7028	-	T	C	C	27215	0.00939006	0.0111806	0.401	NA
HDL	Overall	BiLEVE	MT-TS1	S(UCN)	tRNA serine 1	7476	rs201950015	C	T	T	35690	-0.00274146	0.0348586	0.937315	NA
HDL	noDM	BiLEVE	MT-TS1	S(UCN)	tRNA serine 1	7476	rs201950015	C	T	T	31682	-0.0120795	0.0372942	0.746017	NA
HDL	DM	BiLEVE	MT-TS1	S(UCN)	tRNA serine 1	7476	rs201950015	C	T	T	4008	0.0559882	0.106819	0.600209	NA
HDL	Overall	UKB	MT-TS1	S(UCN)	tRNA serine 1	7476	rs201950015	C	T	T	294483	0.00504848	0.0122712	0.680774	NA
HDL	noDM	UKB	MT-TS1	S(UCN)	tRNA serine 1	7476	rs201950015	C	T	T	267252	0.00656726	0.012933	0.611601	NA
HDL	DM	UKB	MT-TS1	S(UCN)	tRNA serine 1	7476	rs201950015	C	T	T	27231	-0.00815177	0.0415473	0.844452	NA
HDL	Overall	BiLEVE	MT-CO2	COII	Cytochrome c oxidase subunit II	7768	rs41534044	A	G	G	35700	-0.00355916	0.0240303	0.882256	NA
HDL	noDM	BiLEVE	MT-CO2	COII	Cytochrome c oxidase subunit II	7768	rs41534044	A	G	G	31691	-0.00897087	0.0256634	0.726672	NA
HDL	DM	BiLEVE	MT-CO2	COII	Cytochrome c oxidase subunit II	7768	rs41534044	A	G	G	4009	0.0327554	0.0746923	0.661021	NA
HDL	Overall	UKB	MT-CO2	COII	Cytochrome c oxidase subunit II	7768	rs41534044	A	G	G	294478	-0.00295562	0.00836299	0.723777	NA
HDL	noDM	UKB	MT-CO2	COII	Cytochrome c oxidase subunit II	7768	rs41534044	A	G	G	267245	-0.00340011	0.00883333	0.700298	NA
HDL	DM	UKB	MT-CO2	COII	Cytochrome c oxidase subunit II	7768	rs41534044	A	G	G	27233	0.00126619	0.0277078	0.963551	NA
HDL	Overall	BiLEVE	MT-CO2	COII	Cytochrome c oxidase subunit II	8251	rs3021089	G	A	A	35674	-0.00717266	0.0207564	0.729673	NA
HDL	noDM	BiLEVE	MT-CO2	COII	Cytochrome c oxidase subunit II	8251	rs3021089	G	A	A	31667	-0.00233224	0.0222191	0.916404	NA
HDL	DM	BiLEVE	MT-CO2	COII	Cytochrome c oxidase subunit II	8251	rs3021089	G	A	A	4007	-0.0442423	0.0633211	0.484781	NA
HDL	Overall	BiLEVE	MT-CO2	COII	Cytochrome c oxidase subunit II	8269	-	G	A	A	35673	-0.0373037	0.0266095	0.160955	NA
HDL	noDM	BiLEVE	MT-CO2	COII	Cytochrome c oxidase subunit II	8269	-	G	A	A	31668	-0.00743316	0.0283963	0.793504	NA
HDL	DM	BiLEVE	MT-CO2	COII	Cytochrome c oxidase subunit II	8269	-	G	A	A	4005	-0.287319	0.083092	0.000550221	NONE
HDL	Overall	UKB	MT-CO2	COII	Cytochrome c oxidase subunit II	8269	-	G	A	A	293933	-0.00172607	0.00938404	0.854063	NA
HDL	noDM	UKB	MT-CO2	COII	Cytochrome c oxidase subunit II	8269	-	G	A	A	266758	-0.00553015	0.00989394	0.576201	NA
HDL	DM	UKB	MT-CO2	COII	Cytochrome c oxidase subunit II	8269	-	G	A	A	27175	0.0340254	0.0316543	0.282426	NA
HDL	Overall	UKB	MT-ATP8	ATPase8	ATP synthase F0 subunit 8	8448	rs879056797	T	C	C	294520	-0.007923	0.0149249	0.595517	NA
HDL	noDM	UKB	MT-ATP8	ATPase8	ATP synthase F0 subunit 8	8448	rs879056797	T	C	C	267285	-0.0129808	0.0157345	0.40938	NA
HDL	DM	UKB	MT-ATP8	ATPase8	ATP synthase F0 subunit 8	8448	rs879056797	T	C	C	27235	0.0367923	0.0503807	0.465222	NA
HDL	Overall	BiLEVE	MT-ATP6	ATPase6	ATP synthase F0 subunit 6	8697	rs879233543	G	A	A	35651	0.00911125	0.0160343	0.56988	NA
HDL	noDM	BiLEVE	MT-ATP6	ATPase6	ATP synthase F0 subunit 6	8697	rs879233543	G	A	A	31649	0.0119963	0.0171804	0.485022	NA
HDL	DM	BiLEVE	MT-ATP6	ATPase6	ATP synthase F0 subunit 6	8697	rs879233543	G	A	A	4002	-0.0057902	0.0486439	0.905256	NA
HDL	Overall	UKB	MT-ATP6	ATPase6	ATP synthase F0 subunit 6	8697	rs879233543	G	A	A	294200	-0.00446205	0.005545	0.420994	NA
HDL	noDM	UKB	MT-ATP6	ATPase6	ATP synthase F0 subunit 6	8697	rs879233543	G	A	A	266997	-0.00498011	0.00585119	0.394699	NA
HDL	DM	UKB	MT-ATP6	ATPase6	ATP synthase F0 subunit 6	8697	rs879233543	G	A	A	27203	0.000420559	0.0185462	0.981909	NA
HDL	Overall	BiLEVE	MT-ATP6	ATPase6	ATP synthase F0 subunit 6	8994	rs28358887,COSM6716156,COSM6716157	G	A	A	35548	0.0361003	0.0328185	0.271339	NA
HDL	noDM	BiLEVE	MT-ATP6	ATPase6	ATP synthase F0 subunit 6	8994	rs28358887,COSM6716156,COSM6716157	G	A	A	31556	0.0428885	0.0356368	0.228797	NA
HDL	DM	BiLEVE	MT-ATP6	ATPase6	ATP synthase F0 subunit 6	8994	rs28358887,COSM6716156,COSM6716157	G	A	A	3992	-0.0130176	0.0906628	0.885837	NA
HDL	Overall	UKB	MT-ATP6	ATPase6	ATP synthase F0 subunit 6	8994	rs28358887,COSM6716156,COSM6716157	G	A	A	294471	-0.0125684	0.0111956	0.2616	NA
HDL	noDM	UKB	MT-ATP6	ATPase6	ATP synthase F0 subunit 6	8994	rs28358887,COSM6716156,COSM6716157	G	A	A	267243	-0.0111698	0.0118149	0.344456	NA
HDL	DM	UKB	MT-ATP6	ATPase6	ATP synthase F0 subunit 6	8994	rs28358887,COSM6716156,COSM6716157	G	A	A	27228	-0.0285587	0.0374132	0.445271	NA
HDL	Overall	BiLEVE	MT-ATP6	ATPase6	ATP synthase F0 subunit 6	9055	rs193303045	G	A	A	35665	-0.0236882	0.0167947	0.158413	NA
HDL	noDM	BiLEVE	MT-ATP6	ATPase6	ATP synthase F0 subunit 6	9055	rs193303045	G	A	A	31661	-0.0207464	0.0178788	0.245898	NA
HDL	DM	BiLEVE	MT-ATP6	ATPase6	ATP synthase F0 subunit 6	9055	rs193303045	G	A	A	4004	-0.0455199	0.0537015	0.396685	NA
HDL	Overall	UKB	MT-ATP6	ATPase6	ATP synthase F0 subunit 6	9055	rs193303045	G	A	A	293972	-0.00282397	0.00579373	0.625963	NA
HDL	noDM	UKB	MT-ATP6	ATPase6	ATP synthase F0 subunit 6	9055	rs193303045	G	A	A	266796	-6.161e-05	0.00611248	0.991958	NA
HDL	DM	UKB	MT-ATP6	ATPase6	ATP synthase F0 subunit 6	9055	rs193303045	G	A	A	27176	-0.027197	0.0194145	0.161266	NA
HDL	Overall	UKB	MT-ATP6	ATPase6	ATP synthase F0 subunit 6	9123	COSM1155692,COSM1155693	G	A	A	294296	0.0256795	0.0118872	0.0307524	NA
HDL	noDM	UKB	MT-ATP6	ATPase6	ATP synthase F0 subunit 6	9123	COSM1155692,COSM1155693	G	A	A	267079	0.0228585	0.0125316	0.0681436	NA
HDL	DM	UKB	MT-ATP6	ATPase6	ATP synthase F0 subunit 6	9123	COSM1155692,COSM1155693	G	A	A	27217	0.052743	0.0401363	0.188825	NA
HDL	Overall	BiLEVE	MT-CO3	COIII	Cytochrome c oxidase subunit III	9477	rs2853825	G	A	A	35680	0.00982783	0.0165623	0.552926	NA
HDL	noDM	BiLEVE	MT-CO3	COIII	Cytochrome c oxidase subunit III	9477	rs2853825	G	A	A	31676	0.00579646	0.017721	0.743598	NA
HDL	DM	BiLEVE	MT-CO3	COIII	Cytochrome c oxidase subunit III	9477	rs2853825	G	A	A	4004	0.0393852	0.0507021	0.437326	NA
HDL	Overall	UKB	MT-CO3	COIII	Cytochrome c oxidase subunit III	9667	rs41482146	A	G	G	294268	0.00409422	0.0148754	0.783136	NA
HDL	noDM	UKB	MT-CO3	COIII	Cytochrome c oxidase subunit III	9667	rs41482146	A	G	G	267051	0.0023661	0.0156884	0.880119	NA
HDL	DM	UKB	MT-CO3	COIII	Cytochrome c oxidase subunit III	9667	rs41482146	A	G	G	27217	0.0188471	0.0500158	0.706308	NA
HDL	Overall	BiLEVE	MT-CO3	COIII	Cytochrome c oxidase subunit III	9698	-	T	C	C	35580	-0.0212951	0.0172616	0.217332	NA
HDL	noDM	BiLEVE	MT-CO3	COIII	Cytochrome c oxidase subunit III	9698	-	T	C	C	31583	-0.0195461	0.0183617	0.287108	NA
HDL	DM	BiLEVE	MT-CO3	COIII	Cytochrome c oxidase subunit III	9698	-	T	C	C	3997	-0.0352126	0.0555506	0.526194	NA
HDL	Overall	UKB	MT-CO3	COIII	Cytochrome c oxidase subunit III	9698	-	T	C	C	293633	-0.00272651	0.00592278	0.64527	NA
HDL	noDM	UKB	MT-CO3	COIII	Cytochrome c oxidase subunit III	9698	-	T	C	C	266497	-3.71341e-05	0.00624744	0.995257	NA
HDL	DM	UKB	MT-CO3	COIII	Cytochrome c oxidase subunit III	9698	-	T	C	C	27136	-0.0265765	0.0198836	0.181363	NA
HDL	Overall	BiLEVE	MT-CO3	COIII	Cytochrome c oxidase subunit III	9716	rs41502750	T	C	C	35700	-0.0439504	0.0387969	0.257293	NA
HDL	noDM	BiLEVE	MT-CO3	COIII	Cytochrome c oxidase subunit III	9716	rs41502750	T	C	C	31691	-0.0321804	0.0415661	0.438819	NA
HDL	DM	BiLEVE	MT-CO3	COIII	Cytochrome c oxidase subunit III	9716	rs41502750	T	C	C	4009	-0.133486	0.117614	0.256464	NA
HDL	Overall	UKB	MT-CO3	COIII	Cytochrome c oxidase subunit III	9716	rs41502750	T	C	C	294460	0.0224544	0.0133993	0.0937795	NA
HDL	noDM	UKB	MT-CO3	COIII	Cytochrome c oxidase subunit III	9716	rs41502750	T	C	C	267230	0.0250864	0.0141786	0.0768421	NA
HDL	DM	UKB	MT-CO3	COIII	Cytochrome c oxidase subunit III	9716	rs41502750	T	C	C	27230	-0.00126993	0.0436429	0.976787	NA
HDL	Overall	UKB	MT-CO3	COIII	Cytochrome c oxidase subunit III	9899	rs41345446	T	C	C	294407	0.0143765	0.0125781	0.253048	NA
HDL	noDM	UKB	MT-CO3	COIII	Cytochrome c oxidase subunit III	9899	rs41345446	T	C	C	267187	0.0174105	0.0132838	0.189976	NA
HDL	DM	UKB	MT-CO3	COIII	Cytochrome c oxidase subunit III	9899	rs41345446	T	C	C	27220	-0.0158777	0.0417383	0.703643	NA
HDL	Overall	BiLEVE	MT-ND3	ND3	NADH dehydrogenase subunit 3	10238	-	T	C	C	35589	-0.031954	0.0264716	0.2274	NA
HDL	noDM	BiLEVE	MT-ND3	ND3	NADH dehydrogenase subunit 3	10238	-	T	C	C	31595	-0.0269561	0.028141	0.338125	NA
HDL	DM	BiLEVE	MT-ND3	ND3	NADH dehydrogenase subunit 3	10238	-	T	C	C	3994	-0.0673493	0.0856229	0.431574	NA
HDL	Overall	UKB	MT-ND3	ND3	NADH dehydrogenase subunit 3	10238	-	T	C	C	294055	0.023478	0.0090216	0.00925712	NA
HDL	noDM	UKB	MT-ND3	ND3	NADH dehydrogenase subunit 3	10238	-	T	C	C	266854	0.0268235	0.0095115	0.0048011	NA
HDL	DM	UKB	MT-ND3	ND3	NADH dehydrogenase subunit 3	10238	-	T	C	C	27201	-0.00501921	0.030432	0.868999	NA
HDL	Overall	BiLEVE	MT-ND3	ND3	NADH dehydrogenase subunit 3	10398	rs2853826	A	G	G	35551	-0.0267977	0.0117803	0.0229245	NA
HDL	noDM	BiLEVE	MT-ND3	ND3	NADH dehydrogenase subunit 3	10398	rs2853826	A	G	G	31564	-0.0215438	0.0125659	0.0864518	NA
HDL	DM	BiLEVE	MT-ND3	ND3	NADH dehydrogenase subunit 3	10398	rs2853826	A	G	G	3987	-0.0687957	0.0370211	0.0632024	NA
HDL	Overall	UKB	MT-ND3	ND3	NADH dehydrogenase subunit 3	10398	rs2853826	A	G	G	293215	-0.000781548	0.00408255	0.848184	NA
HDL	noDM	UKB	MT-ND3	ND3	NADH dehydrogenase subunit 3	10398	rs2853826	A	G	G	266114	0.000455443	0.00430768	0.915798	NA
HDL	DM	UKB	MT-ND3	ND3	NADH dehydrogenase subunit 3	10398	rs2853826	A	G	G	27101	-0.0117832	0.0136668	0.388599	NA
HDL	Overall	UKB	MT-ND3	ND3	NADH dehydrogenase subunit 3	10400	rs28358278	C	T	T	294393	0.0557166	0.0425249	0.190126	NA
HDL	noDM	UKB	MT-ND3	ND3	NADH dehydrogenase subunit 3	10400	rs28358278	C	T	T	267165	0.0670301	0.0450162	0.136483	NA
HDL	DM	UKB	MT-ND3	ND3	NADH dehydrogenase subunit 3	10400	rs28358278	C	T	T	27228	-0.0383681	0.138002	0.780994	NA
HDL	Overall	BiLEVE	MT-TR	R	tRNA arginine	10463	rs28358279	T	C	C	35603	0.000100632	0.0155707	0.994843	NA
HDL	noDM	BiLEVE	MT-TR	R	tRNA arginine	10463	rs28358279	T	C	C	31603	0.00499954	0.0166667	0.764201	NA
HDL	DM	BiLEVE	MT-TR	R	tRNA arginine	10463	rs28358279	T	C	C	4000	-0.0304574	0.0475868	0.522185	NA
HDL	Overall	UKB	MT-TR	R	tRNA arginine	10463	rs28358279	T	C	C	293746	-0.00615774	0.00539629	0.253827	NA
HDL	noDM	UKB	MT-TR	R	tRNA arginine	10463	rs28358279	T	C	C	266565	-0.00727233	0.00569448	0.201573	NA
HDL	DM	UKB	MT-TR	R	tRNA arginine	10463	rs28358279	T	C	C	27181	0.00466428	0.0180426	0.796012	NA
HDL	Overall	BiLEVE	MT-ND4L	ND4L	NADH dehydrogenase subunit 4L	10550	rs28358280	A	G	G	35690	-0.0213634	0.0172071	0.214412	NA
HDL	noDM	BiLEVE	MT-ND4L	ND4L	NADH dehydrogenase subunit 4L	10550	rs28358280	A	G	G	31682	-0.017599	0.0183115	0.336515	NA
HDL	DM	BiLEVE	MT-ND4L	ND4L	NADH dehydrogenase subunit 4L	10550	rs28358280	A	G	G	4008	-0.0505229	0.0551601	0.359758	NA
HDL	Overall	UKB	MT-ND4L	ND4L	NADH dehydrogenase subunit 4L	10550	rs28358280	A	G	G	294447	-0.00262932	0.00592574	0.657251	NA
HDL	noDM	UKB	MT-ND4L	ND4L	NADH dehydrogenase subunit 4L	10550	rs28358280	A	G	G	267232	0.000843806	0.00625156	0.892632	NA
HDL	DM	UKB	MT-ND4L	ND4L	NADH dehydrogenase subunit 4L	10550	rs28358280	A	G	G	27215	-0.0334914	0.0198598	0.0917318	NA
HDL	Overall	UKB	MT-ND4	ND4	NADH dehydrogenase subunit 4	10819	rs28358283	A	G	G	294426	0.0458278	0.0193856	0.0180786	NA
HDL	noDM	UKB	MT-ND4	ND4	NADH dehydrogenase subunit 4	10819	rs28358283	A	G	G	267190	0.046764	0.020407	0.0219316	NA
HDL	DM	UKB	MT-ND4	ND4	NADH dehydrogenase subunit 4	10819	rs28358283	A	G	G	27236	0.0363873	0.0664223	0.583822	NA
HDL	Overall	UKB	MT-ND4	ND4	NADH dehydrogenase subunit 4	10873	rs2857284	T	C	C	294268	0.0560048	0.0270335	0.038296	NA
HDL	noDM	UKB	MT-ND4	ND4	NADH dehydrogenase subunit 4	10873	rs2857284	T	C	C	267053	0.0599191	0.0286283	0.0363502	NA
HDL	DM	UKB	MT-ND4	ND4	NADH dehydrogenase subunit 4	10873	rs2857284	T	C	C	27215	0.0280595	0.087407	0.748197	NA
HDL	Overall	UKB	MT-ND4	ND4	NADH dehydrogenase subunit 4	10915	rs2857285	T	C	C	294338	0.00799156	0.0150579	0.595611	NA
HDL	noDM	UKB	MT-ND4	ND4	NADH dehydrogenase subunit 4	10915	rs2857285	T	C	C	267116	0.0115689	0.015931	0.467725	NA
HDL	DM	UKB	MT-ND4	ND4	NADH dehydrogenase subunit 4	10915	rs2857285	T	C	C	27222	-0.0263748	0.0491171	0.591287	NA
HDL	Overall	BiLEVE	MT-ND4	ND4	NADH dehydrogenase subunit 4	11251	rs869096886,COSM1138232	A	G	G	35611	-0.0102611	0.011767	0.383201	NA
HDL	noDM	BiLEVE	MT-ND4	ND4	NADH dehydrogenase subunit 4	11251	rs869096886,COSM1138232	A	G	G	31612	-0.006207	0.0125936	0.622108	NA
HDL	DM	BiLEVE	MT-ND4	ND4	NADH dehydrogenase subunit 4	11251	rs869096886,COSM1138232	A	G	G	3999	-0.0399901	0.0360193	0.266963	NA
HDL	Overall	UKB	MT-ND4	ND4	NADH dehydrogenase subunit 4	11251	rs869096886,COSM1138232	A	G	G	293768	-0.00368292	0.0040877	0.367601	NA
HDL	noDM	UKB	MT-ND4	ND4	NADH dehydrogenase subunit 4	11251	rs869096886,COSM1138232	A	G	G	266597	-0.0045071	0.00431424	0.296161	NA
HDL	DM	UKB	MT-ND4	ND4	NADH dehydrogenase subunit 4	11251	rs869096886,COSM1138232	A	G	G	27171	0.00309191	0.0136486	0.820785	NA
HDL	Overall	BiLEVE	MT-ND4	ND4	NADH dehydrogenase subunit 4	11299	rs28358285	T	C	C	35693	-0.0195197	0.0171461	0.254949	NA
HDL	noDM	BiLEVE	MT-ND4	ND4	NADH dehydrogenase subunit 4	11299	rs28358285	T	C	C	31688	-0.0166539	0.0182483	0.361447	NA
HDL	DM	BiLEVE	MT-ND4	ND4	NADH dehydrogenase subunit 4	11299	rs28358285	T	C	C	4005	-0.0406627	0.0549383	0.459251	NA
HDL	Overall	UKB	MT-ND4	ND4	NADH dehydrogenase subunit 4	11299	rs28358285	T	C	C	294434	-0.00120042	0.00590823	0.838997	NA
HDL	noDM	UKB	MT-ND4	ND4	NADH dehydrogenase subunit 4	11299	rs28358285	T	C	C	267214	0.0025032	0.00623342	0.687995	NA
HDL	DM	UKB	MT-ND4	ND4	NADH dehydrogenase subunit 4	11299	rs28358285	T	C	C	27220	-0.0341158	0.0197911	0.0847566	NA
HDL	Overall	UKB	MT-ND4	ND4	NADH dehydrogenase subunit 4	11332	rs55714831	C	T	T	294450	0.0205315	0.0116397	0.0777461	NA
HDL	noDM	UKB	MT-ND4	ND4	NADH dehydrogenase subunit 4	11332	rs55714831	C	T	T	267229	0.0186058	0.0123017	0.13042	NA
HDL	DM	UKB	MT-ND4	ND4	NADH dehydrogenase subunit 4	11332	rs55714831	C	T	T	27221	0.037402	0.0383476	0.3294	NA
HDL	Overall	BiLEVE	MT-ND4	ND4	NADH dehydrogenase subunit 4	11377	rs193302938	G	A	A	35657	-0.0323097	0.0362315	0.372529	NA
HDL	noDM	BiLEVE	MT-ND4	ND4	NADH dehydrogenase subunit 4	11377	rs193302938	G	A	A	31659	-0.0454241	0.0389324	0.243324	NA
HDL	DM	BiLEVE	MT-ND4	ND4	NADH dehydrogenase subunit 4	11377	rs193302938	G	A	A	3998	0.0486978	0.107406	0.650286	NA
HDL	Overall	UKB	MT-ND4	ND4	NADH dehydrogenase subunit 4	11377	rs193302938	G	A	A	293926	-0.0256643	0.012572	0.0412137	NA
HDL	noDM	UKB	MT-ND4	ND4	NADH dehydrogenase subunit 4	11377	rs193302938	G	A	A	266738	-0.026856	0.0132555	0.0427627	NA
HDL	DM	UKB	MT-ND4	ND4	NADH dehydrogenase subunit 4	11377	rs193302938	G	A	A	27188	-0.0140085	0.0423871	0.741033	NA
HDL	Overall	BiLEVE	MT-ND4	ND4	NADH dehydrogenase subunit 4	11467	rs2853493,COSM6716752,COSM6716753	A	G	G	35626	-0.00387703	0.0115425	0.736954	NA
HDL	noDM	BiLEVE	MT-ND4	ND4	NADH dehydrogenase subunit 4	11467	rs2853493,COSM6716752,COSM6716753	A	G	G	31626	-0.00379525	0.0123284	0.758201	NA
HDL	DM	BiLEVE	MT-ND4	ND4	NADH dehydrogenase subunit 4	11467	rs2853493,COSM6716752,COSM6716753	A	G	G	4000	-0.00316672	0.0358659	0.929648	NA
HDL	Overall	UKB	MT-ND4	ND4	NADH dehydrogenase subunit 4	11467	rs2853493,COSM6716752,COSM6716753	A	G	G	293872	5.67168e-05	0.0039854	0.988646	NA
HDL	noDM	UKB	MT-ND4	ND4	NADH dehydrogenase subunit 4	11467	rs2853493,COSM6716752,COSM6716753	A	G	G	266695	0.00102789	0.00420592	0.806929	NA
HDL	DM	UKB	MT-ND4	ND4	NADH dehydrogenase subunit 4	11467	rs2853493,COSM6716752,COSM6716753	A	G	G	27177	-0.00802759	0.0133152	0.546586	NA
HDL	Overall	BiLEVE	MT-ND4	ND4	NADH dehydrogenase subunit 4	11485	-	T	C	C	35663	-0.012582	0.0341477	0.712533	NA
HDL	noDM	BiLEVE	MT-ND4	ND4	NADH dehydrogenase subunit 4	11485	-	T	C	C	31656	-0.0238402	0.0368163	0.517284	NA
HDL	DM	BiLEVE	MT-ND4	ND4	NADH dehydrogenase subunit 4	11485	-	T	C	C	4007	0.0644134	0.0990073	0.515347	NA
HDL	Overall	BiLEVE	MT-ND4	ND4	NADH dehydrogenase subunit 4	11674	rs28358286	C	T	T	35691	0.0492364	0.0349693	0.159143	NA
HDL	noDM	BiLEVE	MT-ND4	ND4	NADH dehydrogenase subunit 4	11674	rs28358286	C	T	T	31683	0.0620634	0.0378556	0.101124	NA
HDL	DM	BiLEVE	MT-ND4	ND4	NADH dehydrogenase subunit 4	11674	rs28358286	C	T	T	4008	-0.0433398	0.0984951	0.659946	NA
[truncated: 240 more rows]

## Sheet: LDL
PHENO	COHORT	ARRAY	GENE	REGION	DESCRIPTION	BP	RS	REF	ALT	A1	OBS_CT	OR.or.BETA	SE.or.LOG(OR)_SE	P	SP2
[truncated: 609 more rows]

## Sheet: SBP
PHENO	COHORT	ARRAY	GENE	REGION	DESCRIPTION	BP	RS	REF	ALT	A1	OBS_CT	OR.or.BETA	SE.or.LOG(OR)_SE	P	SP2
[truncated: 609 more rows]

[truncated: 1 more sheets: TG]
